# Supplementary material for: Microparticles from tumors exposed to radiation promote immune evasion in part by PD-L1
Source: PubMed Central journal article supplement (PMC6937213; doi:10.1038/s41388-019-0971-7), 2019-08-29

## **Supplemental Figures**

### **Figure S1: Breast cancer cell viability as well as TMP number and size in response to radiation.**

**A-C.** EMT/6, PyMT, 4T1, E0771, and DA3 breast carcinoma cell cultures were irradiated once at the indicated radiation doses. Forty-eight hours later, the number of TMPs present in the conditioned medium was evaluated by flow cytometry (**A**, n=5 biological repeats). Cell viability and apoptosis stages of EMT/6, PyMT, and 4T1 were evaluated by 7AAD and Annexin V using flow cytometry (**B**, n=3 biological repeats). The TMP fractions were analyzed for their size by Nanocyte NS300 system. Representative graphs of TMP size for each radiation dose are shown (**C**, n=3 biological repeats). \*p<0.05, #p<0.05 as one-way ANOVA followed by Tukey post-hoc test.

### **Figure S2: Total number of proteins detected in TMPs from control or radiotherapy-exposed cells.**

EMT/6 or PyMT cells were exposed to 2 Gy radiation (RT) or left untreated (control). TMPs were collected 48 h later and their protein content was analyzed by mass spectrometry. The total number of identified proteins was assessed using Perseus software. \*\*p<0.001, as assessed by Student's t-test.

### **Figure S3: Expression of PD-L1 on breast carcinoma TMPs.**

**A-B.** EMT/6, PyMT, 4T1, E0771, and DA3 breast carcinoma cell cultures were irradiated once at the indicated radiation doses. Forty-eight hours later, the percentage of TMPs expressing PD-L1 was assessed by flow cytometry. Representative dot-plots are provided for TMPs from EMT/6, PyMT and 4T1 cells (**A**). The intensity of PD-L1 expression in TMPs was assessed by flow cytometry using median fluorescence intensity (MFI) (**B**, n=3 biological repeats). **C.** MDA-MB-231 cells were implanted into the mammary fat pad of 8-10 week old female SCID mice (n=3/group). When tumors reached 100-200mm<sup>3</sup>, the mice were exposed to a single dose of 2 Gy radiation (2 Gy) or left untreated (Control). Blood was drawn 48 hours later and TMPs were extracted. TMPs were immunostained for human HLA and PD-L1. The percentage of PD-L1 positive TMPs from total HLA<sup>+</sup> TMPs was evaluated by flow cytometry. Naïve non-tumor bearing mice served as a negative control (Naïve). ND – non-detectable. \*\*p<0.01, as assessed by Student's t-test (between control and 2Gy radiation).

### **Figure S4: Validation of PD-L1 expression in PD-L1 KO breast cancer cells**

EMT/6, PyMT, and 4T1 cells were electroporated with pSpCas9-GFP-PD-L1 to generate PD-L1 knock-out (KO) cells. After 48 hours, cells were expanded and sorted for GFP-positive clones. PD-L1 expression of expanded colonies was measured by flow cytometry. The original cell cultures were used as WT control.

**Figure S5: CD8+ cell activity in the presence of TMPs originating from irradiated 4T1 breast carcinoma cells.**

**A.** Splenocytes isolated from naïve 8-10 week old BALB/c mice were cultured with CD3<sup>+</sup>/CD28<sup>+</sup> T cell activating beads in the absence (baseline) or presence of TMPs derived from control or irradiated WT or PD-L1 KO 4T1 cells as indicated in the Figure. Negative control (NC) refers to cultures in the absence of activation beads. Twenty-four hours later, the splenocytes were harvested and the percentage of activated cytotoxic T cells (CD8<sup>+</sup>/CD25<sup>+</sup>) was evaluated by flow cytometry. **B.** Granzyme B levels in conditioned medium of the cultures described in (A) were assessed by specific ELISA. The results represent 3 biological repeats. \*p<0.05, \*\*p<0.01, \*\*\*p<0.001, as assessed by one-way ANOVA followed by Tukey post-hoc test.

**Figure S6: TMPs from irradiated cells do not affect innate immune cells.**

Eight to ten-week-old SCID and 6 Gy sub-lethally irradiated C57Bl/6 mice (n=5/group) were injected with EMT/6 and PyMT cells, respectively (Control). In other groups, mice were co-injected with tumor cells mixed with splenocytes from untreated (Naïve) or tumor bearing mice (Activated) in a 100:1 ratio. In addition, a mixture of tumor cells with naïve splenocytes was co-injected with TMPs originated from control or 2 Gy irradiated cells (TMPs' groups). At endpoint, the percentages of MDSCs (CD11b<sup>+</sup>/Gr-1<sup>+</sup>, **A**) and macrophages (F4/80<sup>+</sup>, **B**) were analyzed in tumors.

**Figure S7: TMPs from 4T1 tumors do not affect immune cell activity.**

**A.** 4T1 tumor cells (5x10<sup>5</sup>/mouse) were orthotopically implanted into the mammary fat pad of 8-10 week old female BALB/c mice (n=4-5 mice/group). When tumors reached 100 mm<sup>3</sup>, mice were either intravenously injected with PBS (control) or TMPs derived from control or 2 Gy irradiated EMT/6 or PyMT cells every three days (indicated by arrows, 1x10<sup>5</sup> TMPs/mouse). Tumor volume was assessed twice weekly. **B–D.** At end point, blood was drawn and tumors and spleens were harvested. The percentage of activated CD8 cells (CD8<sup>+</sup>/CD25<sup>+</sup>) was evaluated in tumors (**B**), spleens (**C**) and peripheral blood (**D**) by flow cytometry. Statistical significance was assessed by one way ANOVA followed by Tukey post-hoc test.

**Figure S8: T cell activity in tumors from mice that underwent adoptive transfer with CD8+ cells cultured with TMPs.**

EMT/6 and PyMT tumors from the adoptive transfer experiment described in Figure 5, were harvested and prepared as single cell suspensions. The percentages of total CD8<sup>+</sup> cells and activated T cells (CD8<sup>+</sup>/CD25<sup>+</sup>) were assessed using flow cytometry. \*\*p<0.01, \*\*\*p<0.001, as assessed by one-way ANOVA followed by Tukey post-hoc test.

**Figure S9: Tumor growth in mice receiving radiation and anti-PD-1 therapy.**

EMT/6 cells were implanted to the mammary fat pad of 8-10 week old female BALB/c mice. When tumors reached 200 mm<sup>3</sup>, treatment with anti-PD-1, a single dose of 2 Gy radiation or the combination of the two, was initiated. Anti-PD-1 was administered twice weekly at a dose of 100µg/mouse. Control mice were injected with IgG control. Tumor growth was assessed twice weekly.

**Figure S1**

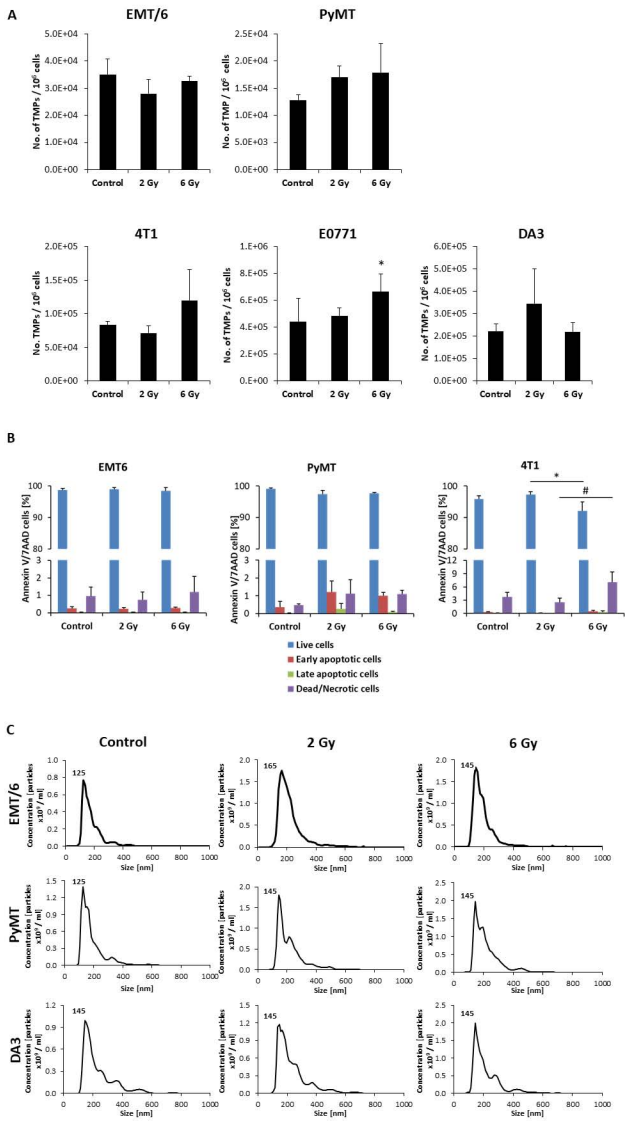

Figure S2

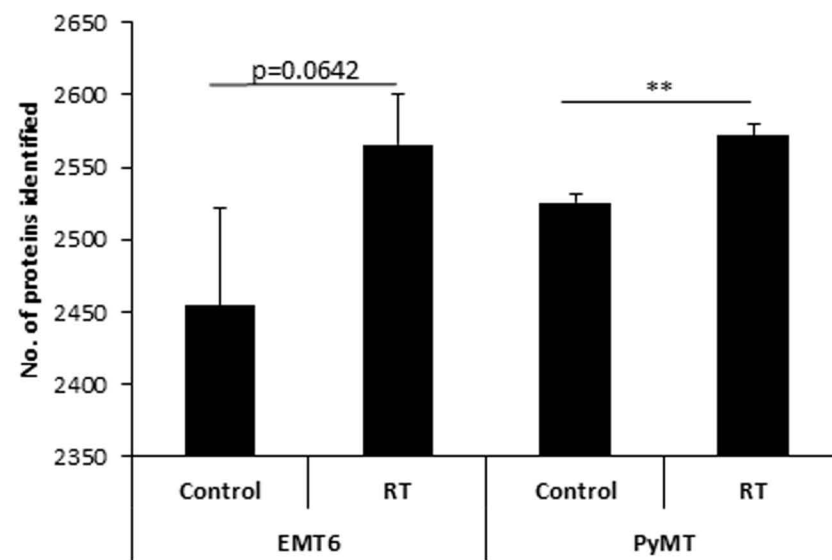

Figure S3

A

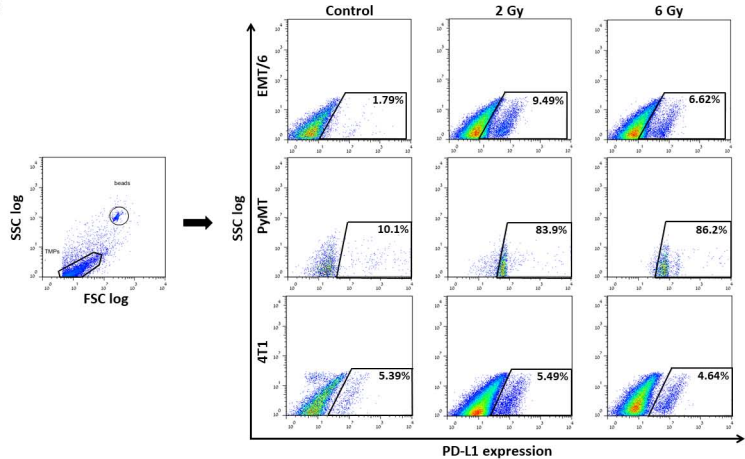

B

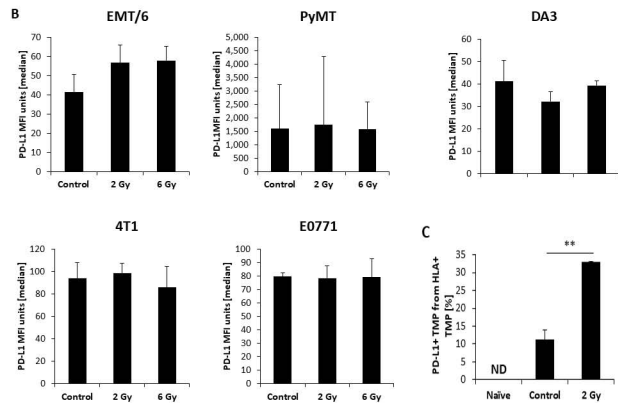

C

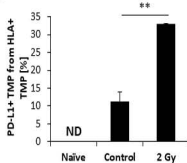

Figure S4

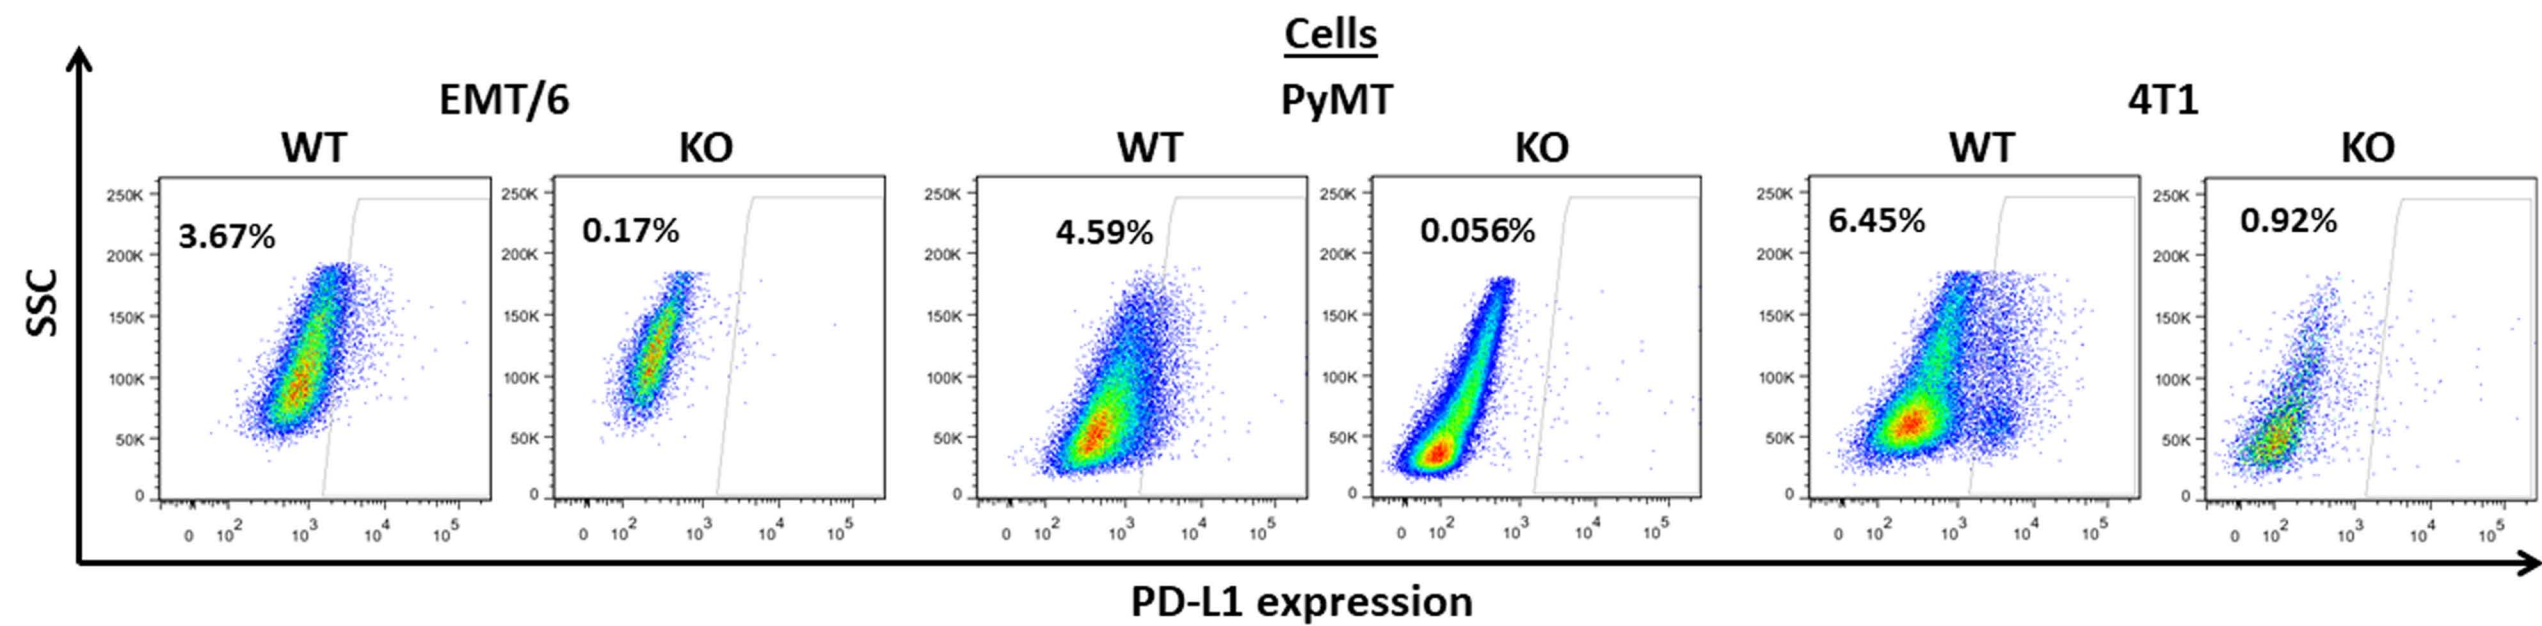

Figure S5

4T1

A

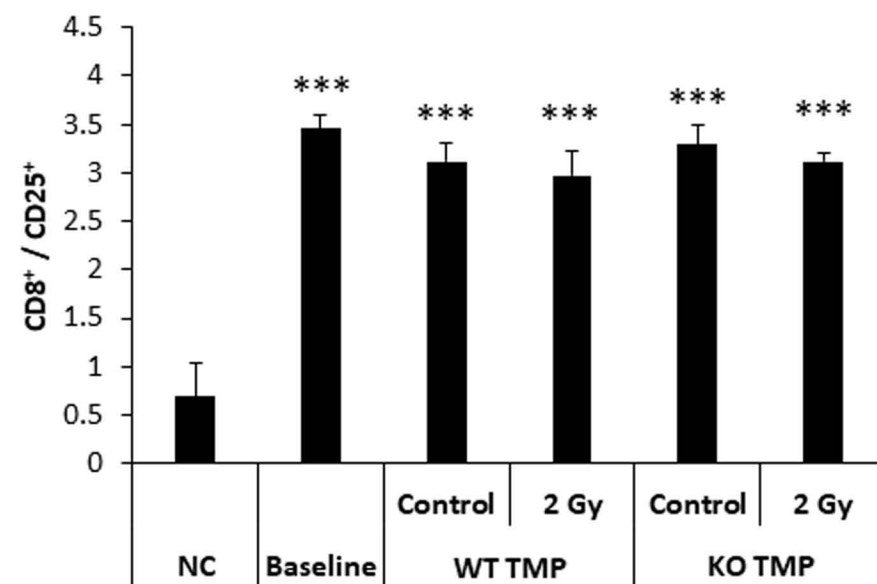

B

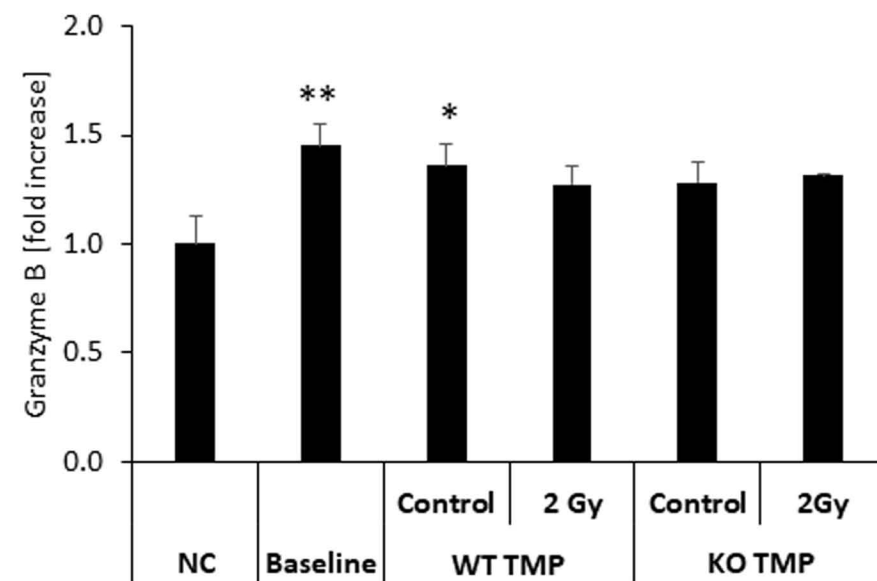



Figure S6

A

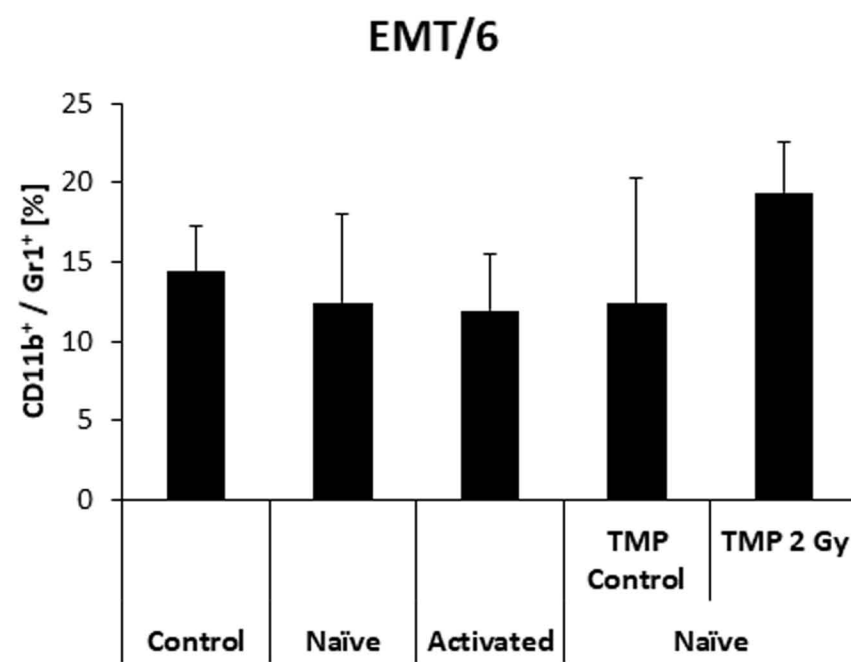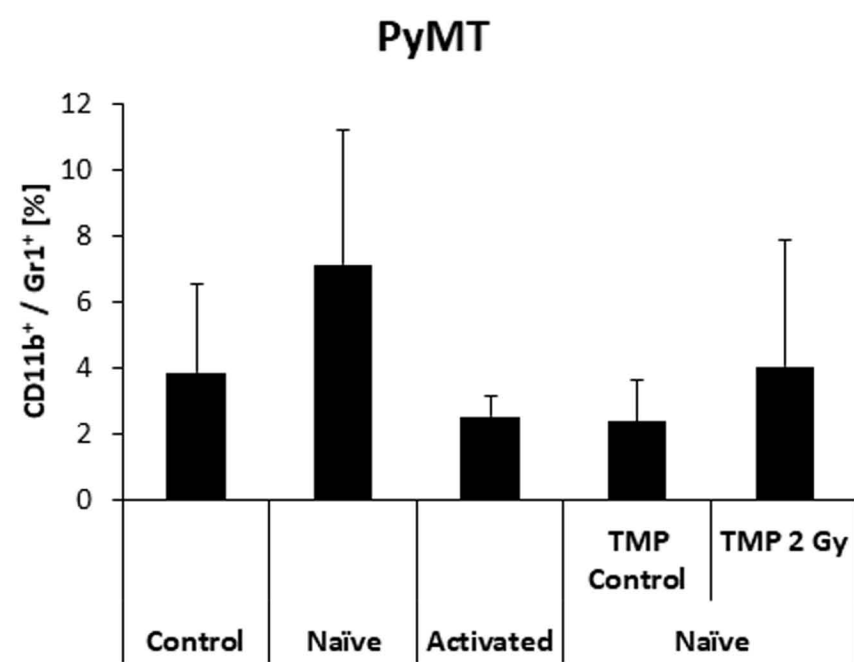

B

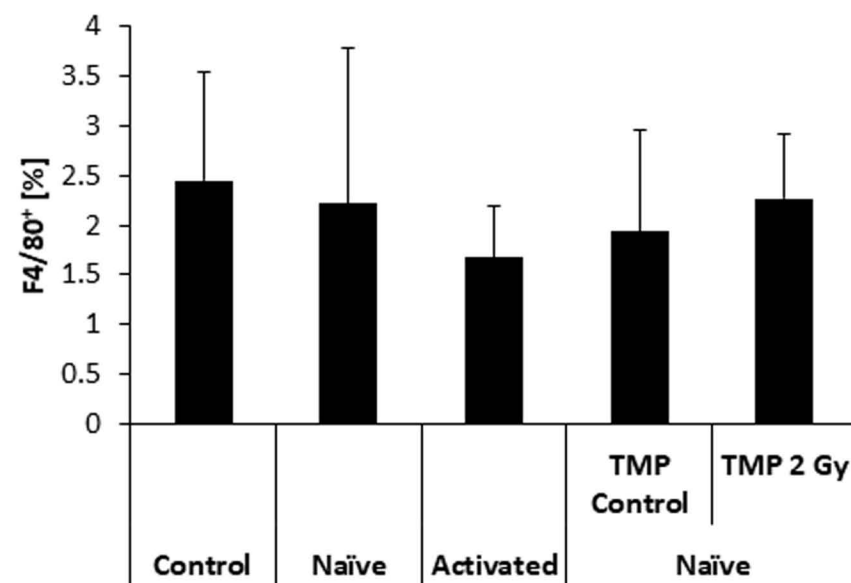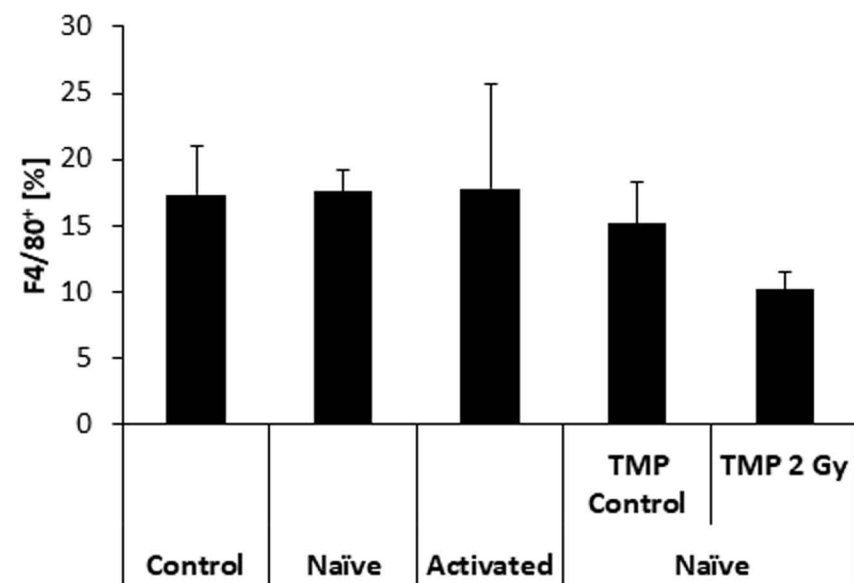

Figure S7

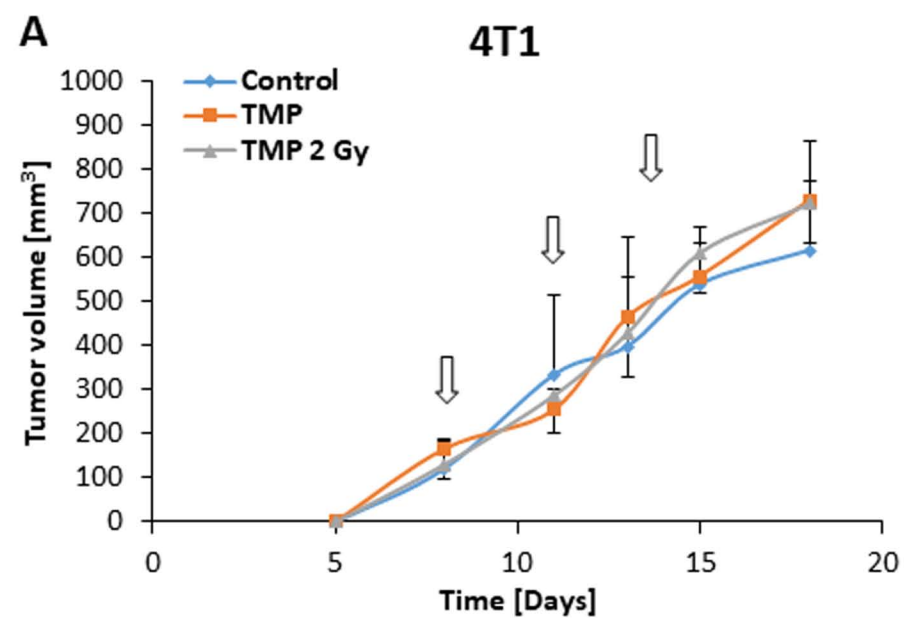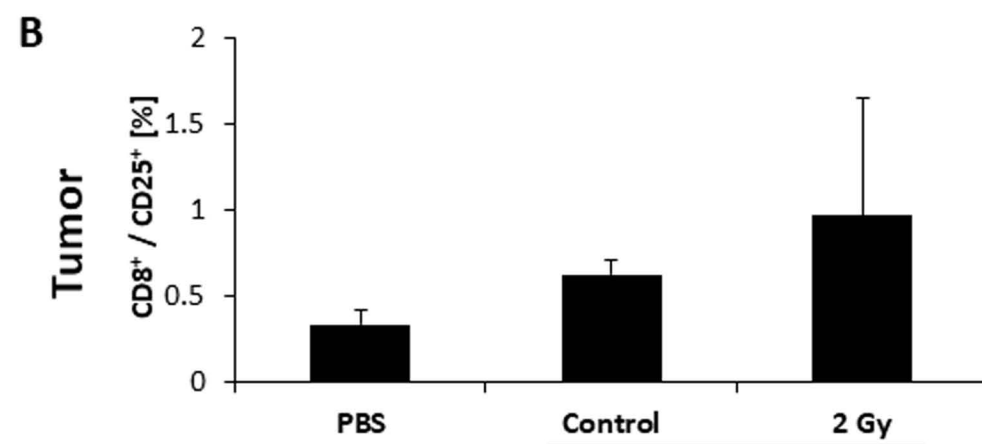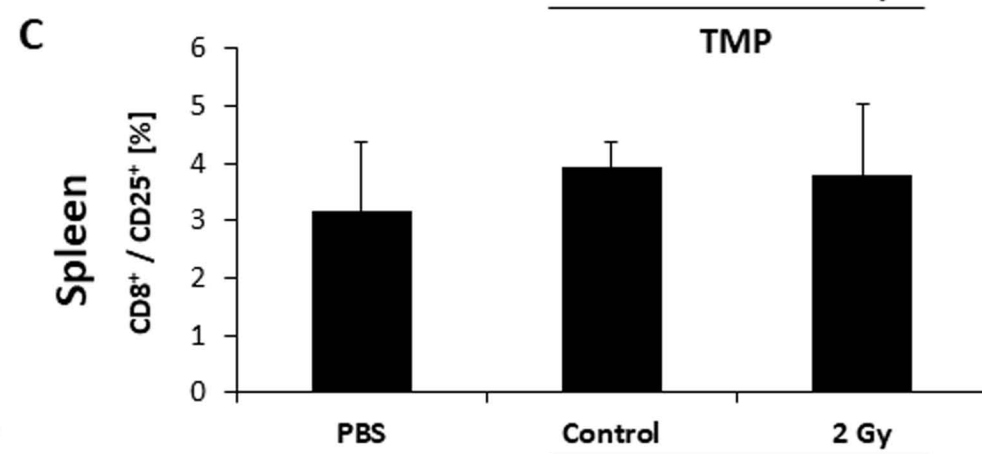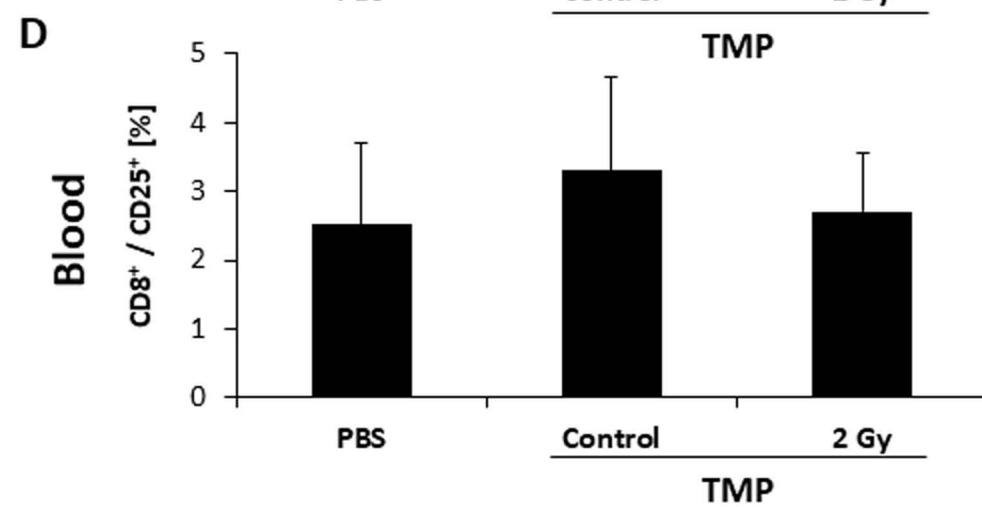

Figure S8

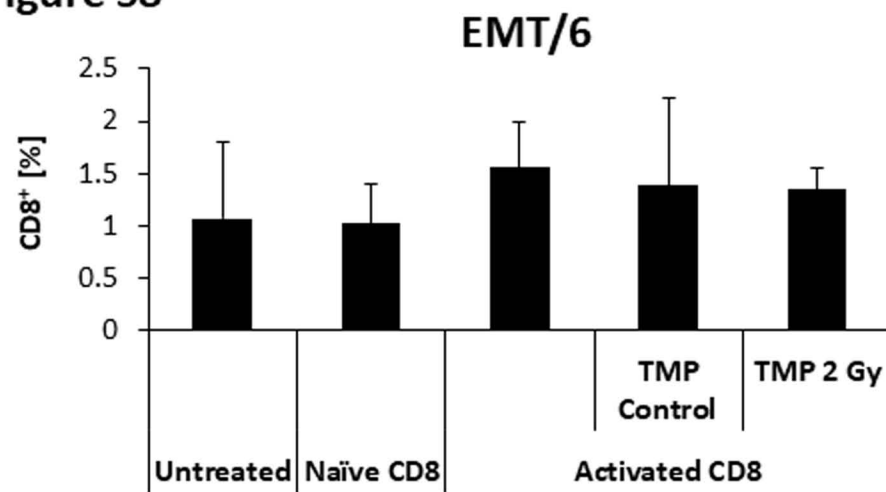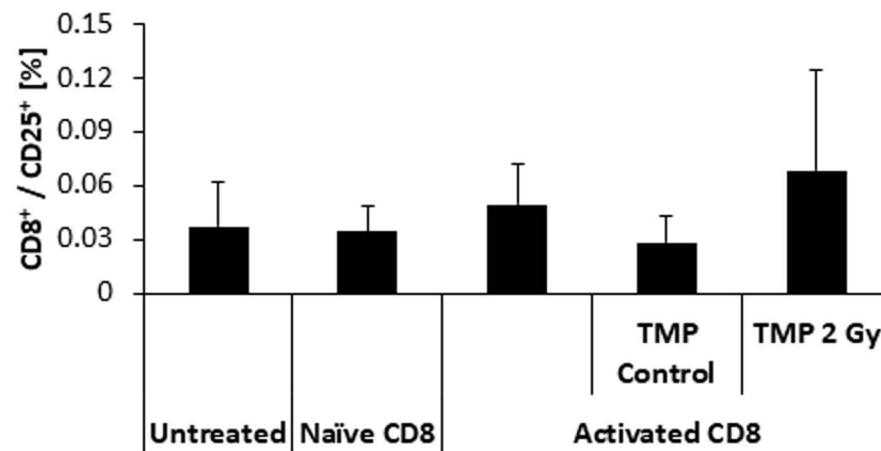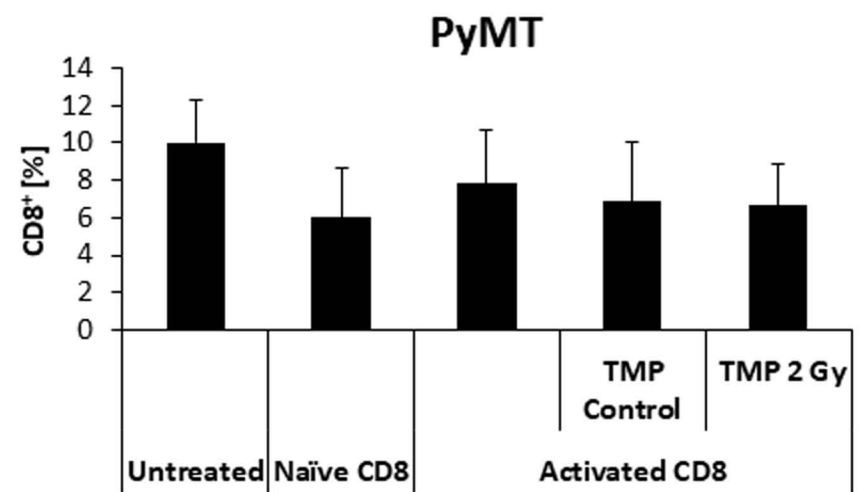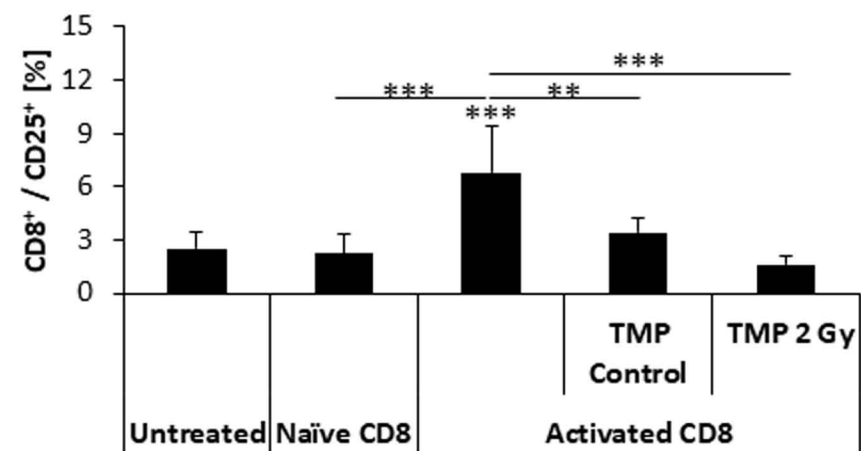

Figure S9

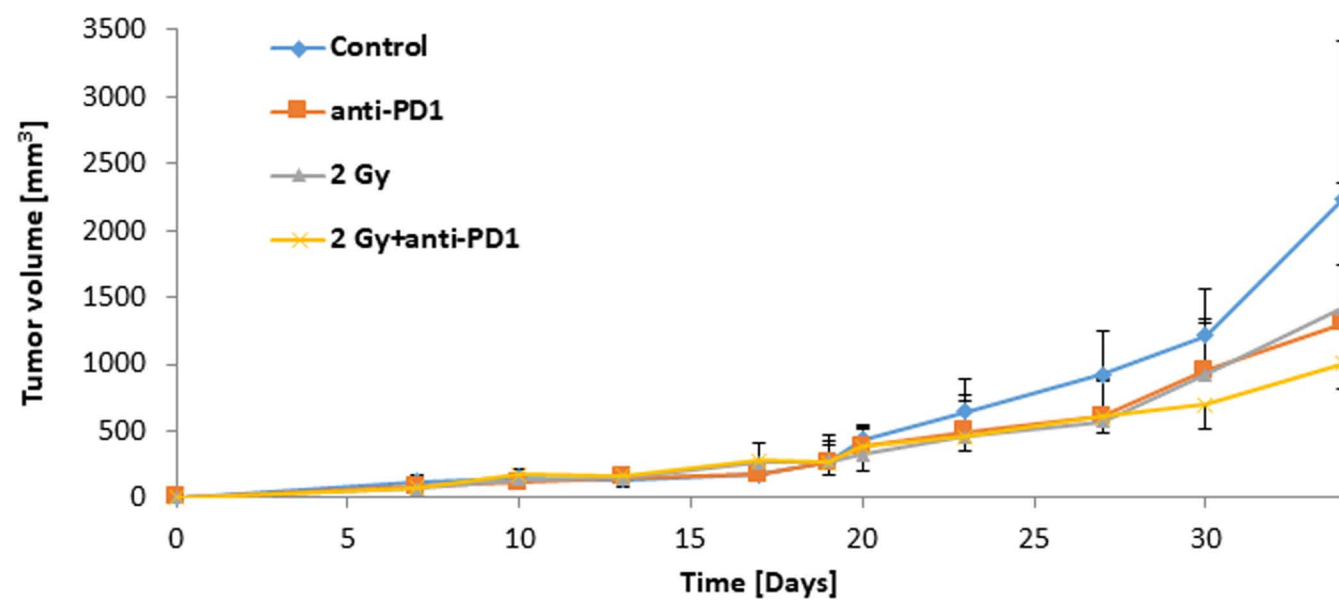

Supplement: 41388_2019_971_MOESM1_ESM.pdf [file 41388_2019_971_MOESM1_ESM.pdf]
