# Supplementary material for: Microparticles from tumors exposed to radiation promote immune evasion in part by PD-L1
Source: PubMed Central journal article supplement (PMC6937213; doi:10.1038/s41388-019-0971-7), 2019-08-29
Supplement: 41388_2019_971_MOESM2_ESM.pdf [file 41388_2019_971_MOESM2_ESM.pdf]

Supplemental table 1: Mass specrometry-based proteomic analysis of TMPs originated from EMT/6 and PyMT cells

| LQF Intensity<br>EMT6 Control1 | LQF Intensity<br>EMT6 Control2 | LQF Intensity<br>EMT6 Control3 | LQF Intensity<br>EMT6 RT1 | LQF Intensity<br>EMT6 RT2 | LQF Intensity<br>EMT6 RT3 | LQF Intensity<br>PYMT Control1 | LQF Intensity<br>PYMT Control2 | LQF Intensity<br>PYMT Control3 |
|--------------------------------|--------------------------------|--------------------------------|---------------------------|---------------------------|---------------------------|--------------------------------|--------------------------------|--------------------------------|
| 32.50142                       | 32.57317                       | 32.4775                        | 32.78293                  | 32.78098                  | 32.75732                  | 32.89374                       | 32.91171                       | 32.83281                       |
| 34.38278                       | 34.22647                       | 34.38921                       | 34.28967                  | 34.30334                  | 34.38278                  | 35.31352                       | 35.32697                       | 35.26192                       |
| 33.74535                       | 33.80424                       | 33.66289                       | 34.09899                  | 34.08322                  | 34.14528                  | 35.83045                       | 35.8186                        | 35.75782                       |
| 31.68395                       | 31.76525                       | 31.62418                       | 31.33031                  | 31.25912                  | 31.33031                  | 31.98142                       | 31.91883                       | 31.92592                       |
| 36.12809                       | 36.19564                       | 36.08124                       | 36.69177                  | 36.63882                  | 36.79217                  | 38.95535                       | 39.01109                       | 39.06477                       |
| 32.04791                       | 32.08639                       | 32.03157                       | 31.59779                  | 31.55728                  | 31.59335                  | 31.44825                       | 31.30878                       | 31.39305                       |
| 33.3956                        | 33.56411                       | 33.43341                       | 33.27586                  | 33.26192                  | 33.26192                  | 31.25912                       | 31.23649                       | 31.22504                       |
| 32.92238                       | 32.98651                       | 32.95913                       | 32.84221                  | 32.8347                   | 32.83658                  | 32.89374                       | 32.78488                       | 32.82335                       |
| 32.90992                       | 32.96774                       | 32.71088                       | 32.3956                   | 32.27864                  | 32.52262                  | 23.94949                       | 23.67573                       | 24.50446                       |
| 33.64151                       | 33.69437                       | 33.58665                       | 32.80424                  | 32.81574                  | 32.85712                  | 32.82904                       | 32.78098                       | 32.7272                        |
| 31.68813                       | 31.87555                       | 31.71702                       | 31.71702                  | 31.74935                  | 31.72517                  | 31.64581                       | 31.62418                       | 31.66289                       |
| 31.03486                       | 31.16639                       | 31.03486                       | 30.98821                  | 30.9746                   | 31.02168                  | 31.64581                       | 31.59335                       | 31.60664                       |
| 30.42342                       | 30.64581                       | 30.61105                       | 30.41337                  | 30.36202                  | 30.34096                  | 31.19601                       | 31.13001                       | 31.0927                        |
| 34.52962                       | 34.55842                       | 35.20478                       | 35.63612                  | 34.41463                  | 34.47629                  | 20.17035                       | 23.73892                       | 22.54745                       |
| 30.5389                        | 30.71293                       | 30.47267                       | 30.38278                  | 30.34096                  | 30.37244                  | 30.60222                       | 30.54812                       | 30.5389                        |
| 31.81574                       | 31.89735                       | 31.84969                       | 31.61105                  | 31.61544                  | 31.61982                  | 31.74134                       | 31.71293                       | 31.71293                       |
| 28.81421                       | 28.87701                       | 28.37451                       | 28.80193                  | 28.70965                  | 28.61456                  | 30.09899                       | 30.17236                       | 29.94                          |
| 32.13001                       | 32.28967                       | 32.23934                       | 31.74134                  | 31.61982                  | 31.80809                  | 26.99766                       | 25.98251                       | 26.45356                       |
| 33.11613                       | 33.08163                       | 33.2004                        | 32.82525                  | 32.85341                  | 32.91528                  | 32.79266                       | 32.84782                       | 32.80617                       |
| 33.28967                       | 33.31689                       | 33.78488                       | 33.45807                  | 33.40831                  | 33.40831                  | 20.2535                        | 22.55684                       | 20.1946                        |
| 33.63071                       | 33.65224                       | 33.75533                       | 33.58665                  | 33.58665                  | 33.65224                  | 33.65224                       | 33.64151                       | 33.61982                       |
| 31.94                          | 32.08639                       | 31.91528                       | 32.13614                  | 32.14224                  | 32.12694                  | 32.90275                       | 32.8792                        | 32.89193                       |
| 30.08639                       | 30.27586                       | 30.09899                       | 30.19601                  | 30.19601                  | 30.18423                  | 30.62854                       | 30.57542                       | 30.57542                       |
| 31.82335                       | 31.80424                       | 31.84221                       | 31.49667                  | 31.54812                  | 31.49667                  | 32.75732                       | 32.80424                       | 32.89374                       |
| 30.83092                       | 30.9746                        | 30.87555                       | 30.48232                  | 30.46295                  | 30.56638                  | 31.31959                       | 31.29242                       | 31.27031                       |
| 32.92415                       | 32.8347                        | 32.96258                       | 32.88649                  | 32.94349                  | 32.8792                   | 33.72517                       | 33.74535                       | 33.80424                       |
| 33.10368                       | 33.01339                       | 33.12848                       | 33.26192                  | 33.26192                  | 33.34361                  | 33.7751                        | 33.79459                       | 33.78488                       |
| 33.20624                       | 33.19601                       | 33.26192                       | 32.2106                   | 32.2106                   | 32.2106                   | 30.75334                       | 30.78488                       | 30.7211                        |
| 32.2814                        | 32.26752                       | 32.35678                       | 32.58442                  | 32.58889                  | 32.57768                  | 33.33031                       | 33.33031                       | 33.24785                       |
| 33.87004                       | 33.78488                       | 33.91528                       | 33.49429                  | 33.50616                  | 33.5527                   | 32.88467                       | 32.76327                       | 32.79071                       |
| 33.43341                       | 33.5527                        | 33.49429                       | 33.50616                  | 33.51794                  | 33.5527                   | 32.76327                       | 32.73529                       | 32.67556                       |
| 30.00838                       | 30.18423                       | 29.92592                       | 30.23078                  | 30.13614                  | 30.19601                  | 30.12386                       | 30.08639                       | 30.02168                       |
| 29.86821                       | 29.71457                       | 29.68479                       | 29.31743                  | 29.27808                  | 29.44332                  | 24.90885                       | 23.0258                        | 24.26069                       |
| 30.44332                       | 30.59335                       | 30.41337                       | 30.45317                  | 30.40324                  | 30.4334                   | 29.55545                       | 29.40121                       | 29.55545                       |
| 22.18253                       | 23.00196                       | 22.85567                       | 22.78556                  | 21.67573                  | 22.90793                  | 30.08639                       | 29.91171                       | 30.20769                       |
| 33.35678                       | 33.34361                       | 33.40831                       | 33.59779                  | 33.69437                  | 33.70471                  | 33.35678                       | 33.36984                       | 33.38278                       |
| 27.84446                       | 26.77706                       | 27.43936                       | 26.78955                  | 26.93157                  | 24.85281                  | 30.94                          | 30.86083                       | 31.04791                       |
| 32.49905                       | 32.53659                       | 32.51559                       | 31.90813                  | 31.91171                  | 31.9746                   | 31.4919                        | 31.57542                       | 31.48712                       |
| 31.94349                       | 32.04466                       | 32.06085                       | 31.48712                  | 31.51089                  | 31.52496                  | 31.20769                       | 31.20769                       | 31.25912                       |
| 30.79266                       | 31.0544                        | 30.80039                       | 30.94                     | 30.89012                  | 30.87555                  | 30.73731                       | 30.7692                        | 30.65438                       |
| 36.97417                       | 36.82809                       | 36.99538                       | 36.6116                   | 36.66554                  | 36.63882                  | 36.36496                       | 36.38439                       | 36.36169                       |
| 33.05278                       | 33.09428                       | 33.08163                       | 33.51794                  | 33.52962                  | 33.51794                  | 33.24785                       | 33.15587                       | 33.23363                       |
| 31.94698                       | 32.12078                       | 31.95046                       | 32.03485                  | 31.97117                  | 32.04791                  | 30.67135                       | 30.55728                       | 30.61105                       |
| 34.77999                       | 34.47629                       | 34.93737                       | 34.51794                  | 34.64151                  | 34.60885                  | 34.50024                       | 34.64151                       | 34.43341                       |
| 31.09899                       | 31.26472                       | 31.04791                       | 31.03486                  | 30.98821                  | 31.00169                  | 29.82335                       | 29.89157                       | 29.76129                       |
| 31.80809                       | 31.84969                       | 31.84221                       | 32.48712                  | 32.50142                  | 32.59557                  | 32.48712                       | 32.47024                       | 32.45317                       |
| 32.50142                       | 32.62418                       | 32.53659                       | 32.61982                  | 32.63504                  | 32.64367                  | 32.43092                       | 32.4919                        | 32.42091                       |
| 30.33031                       | 30.5389                        | 30.27586                       | 30.4334                   | 30.37244                  | 30.44332                  | 30.2535                        | 30.33031                       | 30.14831                       |
| 28.87408                       | 28.69975                       | 28.78955                       | 29.92592                  | 29.91171                  | 29.99496                  | 30.4334                        | 30.41337                       | 30.55728                       |
| 33.0927                        | 33.06085                       | 33.0927                        | 33.03321                  | 32.98651                  | 33.00001                  | 33.2135                        | 33.20624                       | 33.20332                       |
| 31.08005                       | 31.17831                       | 30.91883                       | 31.16639                  | 31.23649                  | 31.23078                  | 31.25912                       | 31.20186                       | 31.16639                       |
| 29.1866                        | 29.31959                       | 29.13124                       | 29.24672                  | 29.26472                  | 29.33245                  | 29.75812                       | 29.82941                       | 29.84146                       |
| 36.11458                       | 35.98905                       | 36.07328                       | 36.07128                  | 36.13958                  | 36.10681                  | 36.1107                        | 36.23006                       | 36.09703                       |
| 27.78955                       | 27.80809                       | 27.75812                       | 27.91456                  | 27.76446                  | 27.77077                  | 27.80809                       | 28.16039                       | 27.91456                       |
| 34.21205                       | 34.31689                       | 34.28967                       | 34.76525                  | 34.76525                  | 34.75035                  | 32.81                          | 32.85341                       | 32.88831                       |
| 30.08639                       | 30.28692                       | 30.03486                       | 30.42342                  | 30.34096                  | 30.41337                  | 29.98142                       | 29.92592                       | 29.76762                       |
| 31.40832                       | 31.45807                       | 31.52496                       | 31.38792                  | 31.28692                  | 31.26472                  | 31.86452                       | 31.91528                       | 31.86452                       |
| 28.82639                       | 29.08891                       | 28.72598                       | 28.98685                  | 28.97869                  | 29.05569                  | 29.66966                       | 29.57001                       | 29.61456                       |
| 29.61456                       | 29.62331                       | 29.42542                       | 29.72598                  | 29.75015                  | 29.7162                   | 30.59335                       | 30.67976                       | 30.59335                       |
| 35.36659                       | 35.38278                       | 35.386                         | 35.28278                  | 35.32362                  | 35.31689                  | 35.19381                       | 35.11846                       | 35.15285                       |
| 30.66289                       | 30.77706                       | 30.7211                        | 30.55728                  | 30.58441                  | 30.61105                  | 30.80039                       | 30.67976                       | 30.67976                       |
| 30.44332                       | 30.6372                        | 30.50142                       | 29.85192                  | 29.69644                  | 29.91171                  | 29.77706                       | 29.65096                       | 29.6764                        |
| 30.95394                       | 31.06728                       | 31.0414                        | 31.14224                  | 31.11148                  | 31.11768                  | 31.98821                       | 31.91171                       | 31.95046                       |
| 28.91741                       | 29.20303                       | 28.98142                       | 28.68979                  | 28.68311                  | 28.72923                  | 29.58799                       | 29.48424                       | 29.51277                       |
| 30.94                          | 31.06085                       | 30.9746                        | 30.87555                  | 30.91171                  | 30.94698                  | 28.4512                        | 28.63201                       | 28.22159                       |
| 30.81574                       | 30.93298                       | 30.88285                       | 30.88285                  | 30.86083                  | 30.81574                  | 30.52028                       | 30.52962                       | 30.46295                       |
| 29.04791                       | 29.08891                       | 28.94                          | 29.18187                  | 29.08385                  | 29.15557                  | 29.78644                       | 29.86673                       | 29.78019                       |
| 31.66712                       | 31.63288                       | 31.81192                       | 31.89374                  | 31.89735                  | 31.95394                  | 31.86083                       | 31.87555                       | 31.91883                       |
| 29.69146                       | 29.91171                       | 29.69644                       | 29.4919                   | 29.41337                  | 29.3452                   | 28.44332                       | 28.34096                       | 28.43539                       |
| 30.77706                       | 30.76129                       | 30.72923                       | 31.27031                  | 31.27586                  | 31.26472                  | 31.44825                       | 31.45317                       | 31.40324                       |
| 30.34096                       | 30.35153                       | 30.51089                       | 30.44332                  | 30.39305                  | 30.44332                  | 31.08639                       | 31.38278                       | 31.17831                       |
| 28.1795                        | 27.97596                       | 27.92025                       | 27.0296                   | 27.39917                  | 27.5969                   | 30.80809                       | 30.91171                       | 30.89735                       |
| 29.58082                       | 29.56638                       | 29.5389                        | 29.46684                  | 29.51277                  | 29.40933                  | 30.93298                       | 30.95394                       | 30.81574                       |
| 30.52962                       | 30.70471                       | 30.52962                       | 30.42342                  | 30.41337                  | 30.34096                  | 30.61982                       | 30.7211                        | 30.44332                       |
| 31.51559                       | 31.44825                       | 31.44332                       | 32.14224                  | 32.13919                  | 32.15738                  | 32.46782                       | 32.48232                       | 32.46539                       |
| 33.38278                       | 33.51794                       | 33.54121                       | 33.0927                   | 33.16339                  | 33.06085                  | 33.81383                       | 33.74535                       | 33.78488                       |
| 29.82487                       | 29.89735                       | 29.94                          | 29.73731                  | 29.85638                  | 29.89446                  | 30.33031                       | 30.4919                        | 30.31959                       |
| 28.37865                       | 28.52776                       | 28.06085                       | 29.02433                  | 29.00571                  | 28.76129                  | 29.89735                       | 29.94                          | 29.86083                       |
| 29.55179                       | 29.66797                       | 29.58262                       | 29.40324                  | 29.33458                  | 29.30008                  | 30.00838                       | 29.87262                       | 30.04791                       |
| 30.03486                       | 30.04791                       | 29.84446                       | 29.98142                  | 29.99496                  | 29.94                     | 29.30443                       | 29.54444                       | 29.28692                       |
| 30.33031                       | 30.33031                       | 30.4334                        | 30.67135                  | 30.71293                  | 30.86821                  | 25.45826                       | 25.1488                        | 25.78207                       |
| 29.391                         | 29.57001                       | 29.35363                       | 29.38895                  | 29.38072                  | 29.31095                  | 29.509                         | 29.54995                       | 29.49762                       |
| 29.54995                       | 29.71457                       | 29.54444                       | 29.61105                  | 29.60929                  | 29.55728                  | 30.61982                       | 30.66289                       | 30.62854                       |
| 31.44825                       | 31.45807                       | 31.45807                       | 31.28692                  | 31.38792                  | 31.40832                  | 31.56638                       | 31.55728                       | 31.54352                       |
| 31.00169                       | 31.12386                       | 31.17236                       | 31.35153                  | 31.32496                  | 31.40832                  | 29.49572                       | 29.59335                       | 29.60045                       |

|          |          |          |          |          |          |          |          |          |
|----------|----------|----------|----------|----------|----------|----------|----------|----------|
| 30.33031 | 30.34096 | 30.23078 | 29.80655 | 29.68311 | 29.67472 | 29.12386 | 28.95671 | 28.98956 |
| 31.19013 | 31.11768 | 31.08639 | 29.92592 | 29.31743 | 30.07368 | NaN      | 22.8839  | 21.46762 |
| 30.61982 | 30.59335 | 30.54812 | 30.51089 | 30.46295 | 30.54812 | 29.70306 | 27.75653 | 29.81421 |
| 32.85527 | 32.91705 | 33.00336 | 32.4919  | 32.4007  | 32.44825 | 32.81955 | 32.83658 | 32.8347  |
| 30.34096 | 30.47267 | 30.40324 | 30.85341 | 30.73731 | 30.83846 | 31.56638 | 31.4334  | 31.37762 |
| 36.58385 | 36.47327 | 36.55556 | 36.65224 | 36.67871 | 36.70471 | 36.37794 | 36.34856 | 36.41148 |
| 31.76129 | 31.81574 | 31.90096 | 31.38792 | 31.31959 | 31.33565 | 29.41337 | 29.33031 | 29.48424 |
| 28.11148 | 28.15557 | 28.04531 | 28.27142 | 28.23535 | 28.12633 | 27.76446 | 27.90885 | 27.77706 |
| 29.13369 | 29.19366 | 28.96499 | 29.15074 | 29.01903 | 28.99226 | 28.93719 | 28.79885 | 28.82335 |
| 29.91171 | 30.11148 | 30.06085 | 30.2535  | 30.19601 | 30.23078 | 30.11148 | 30.02168 | 30.11148 |
| 29.60576 | 29.77706 | 29.65779 | 29.48616 | 29.57542 | 29.54444 | 29.258   | 29.13614 | 29.19835 |
| 31.74134 | 30.40324 | 31.44332 | 30.82335 | 31.34625 | 31.25912 | 23.18101 | 21.48738 | 23.57542 |
| 28.81726 | 28.84446 | 28.79576 | 29.12633 | 29.07112 | 29.03223 | 29.60222 | 29.82031 | 29.52776 |
| 29.258   | 29.51277 | 29.36202 | 29.20769 | 29.30008 | 29.27364 | 29.87408 | 29.88867 | 29.83696 |
| 31.94349 | 32.09899 | 32.08322 | 31.68395 | 31.66289 | 31.69229 | 31.7211  | 31.57993 | 31.61544 |
| 28.4073  | 28.7357  | 28.52028 | 28.99766 | 28.92592 | 28.89446 | 28.91741 | 29.3452  | 28.89446 |
| 32.98142 | 32.8792  | 33.07208 | 32.45807 | 32.48951 | 32.44825 | 32.06085 | 32.09899 | 32.07048 |
| 30.95394 | 31.16639 | 31.13614 | 30.95394 | 30.86083 | 30.88285 | 31.50616 | 31.5389  | 31.4919  |
| 31.0927  | 31.2135  | 31.14224 | 31.02828 | 30.95394 | 31.06728 | 31.25912 | 31.18423 | 31.18423 |
| 30.04791 | 30.23078 | 30.08639 | 30.28692 | 30.26472 | 30.24218 | 29.38895 | 29.48424 | 29.42342 |
| 28.49381 | 28.53519 | 28.59335 | 28.29351 | 28.22619 | 28.31527 | 27.66628 | 27.84446 | 28.19835 |
| 32.22791 | 32.20186 | 32.16039 | 31.96086 | 31.92238 | 31.96086 | 29.92592 | 29.89735 | 29.83394 |
| 28.98414 | 29.29789 | 29.08639 | 29.26249 | 29.2957  | 29.22159 | 29.391   | 29.27364 | 29.21002 |
| 31.61982 | 31.67976 | 31.6501  | 32.04466 | 32.01837 | 31.90455 | 31.5389  | 31.47267 | 31.52496 |
| 30.18423 | 30.28692 | 30.26472 | 30.23078 | 30.27586 | 30.24218 | 31.28692 | 31.29242 | 31.25912 |
| 28.19366 | 28.3452  | 28.20303 | 28.05051 | 28.01903 | 27.97049 | 27.77706 | 27.99226 | 27.98685 |
| 30.80039 | 30.77706 | 30.75334 | 30.66289 | 30.61105 | 30.67976 | 30.86821 | 30.85341 | 30.82335 |
| 27.72598 | 27.99766 | 27.63201 | 27.93157 | 27.95394 | 28.06599 | 28.20769 | 28.24445 | 28.20303 |
| 30.61982 | 30.80039 | 30.65438 | 30.41337 | 30.50142 | 30.52028 | 30.78488 | 30.75334 | 30.76129 |
| 31.50142 | 31.61982 | 31.54352 | 31.19601 | 31.20186 | 31.18423 | 30.65438 | 30.58441 | 30.73731 |
| 30.91883 | 30.94698 | 30.94698 | 30.80039 | 30.88285 | 30.89012 | 31.21928 | 31.0414  | 31.0927  |
| 30.70471 | 30.73731 | 30.60222 | 30.61105 | 30.66289 | 30.61982 | 30.99496 | 30.93298 | 30.88285 |
| 30.48232 | 30.68813 | 30.48232 | 31.16639 | 31.18423 | 31.12386 | 31.19601 | 31.20186 | 31.16639 |
| 30.78488 | 30.61982 | 30.81574 | 30.47267 | 30.42342 | 30.42342 | 30.89735 | 30.85341 | 30.98821 |
| 28.27142 | 28.55728 | 28.32817 | 28.20303 | 28.1795  | 28.15557 | 29.15316 | 29.08891 | 29.09648 |
| 33.63071 | 33.72517 | 33.68395 | 32.79653 | 32.7692  | 32.76525 | 29.81421 | 29.70965 | 29.87262 |
| 30.24218 | 30.46295 | 30.27586 | 30.61105 | 30.62854 | 30.64581 | 30.41337 | 30.30878 | 30.40324 |
| 30.36202 | 30.4919  | 30.28692 | 30.20769 | 30.34096 | 30.38278 | 30.00838 | 29.92592 | 29.95394 |
| 30.62854 | 30.82335 | 30.62854 | 29.88867 | 29.87555 | 29.99496 | 30.66289 | 30.67135 | 30.54812 |
| 30.62854 | 30.72923 | 30.6372  | 30.74535 | 30.74535 | 30.78488 | 30.19601 | 30.20769 | 30.28692 |
| 32.49429 | 32.5038  | 32.55728 | 32.30878 | 32.20478 | 32.25068 | 31.43837 | 31.59779 | 31.39816 |
| 30.30878 | 30.4334  | 30.24218 | 30.24218 | 30.27586 | 30.19601 | 29.46684 | 29.48808 | 29.34731 |
| 29.30226 | 29.56092 | 29.30878 | 28.23991 | 28.16039 | 28.24898 | 30.80809 | 30.78488 | 31.02828 |
| 27.47846 | 27.5389  | 27.45513 | 27.43141 | 27.49381 | 27.39917 | 27.83846 | 27.69975 | 27.64581 |
| 30.96774 | 31.0414  | 31.0544  | 30.70471 | 30.70471 | 30.67135 | 30.84595 | 30.76129 | 30.73731 |
| 30.29789 | 30.07368 | 30.28692 | 30.16039 | 30.07368 | 30.20769 | 30.65438 | 30.86821 | 30.76129 |
| 30.68813 | 30.81574 | 30.75334 | 30.58441 | 30.57542 | 30.65438 | 29.19601 | 29.14102 | 29.34942 |
| 30.30878 | 30.27586 | 30.35153 | 30.51089 | 30.58441 | 30.76129 | 29.71947 | 29.76288 | 29.66119 |
| 29.05827 | 29.09396 | 28.98956 | 29.09396 | 29.12386 | 29.06085 | 29.56819 | 29.38278 | 29.48232 |
| 28.74855 | 28.92875 | 28.42742 | 28.80809 | 28.81115 | 28.86231 | 27.42342 | 27.66628 | 28.45513 |
| 29.62506 | 29.64924 | 29.69644 | 29.03748 | 29.08639 | 29.06856 | 28.27586 | 28.258   | 28.29351 |
| 29.84146 | 29.56638 | 30.08639 | 28.23991 | 27.63893 | 28.54995 | 26.38772 | 25.67303 | 27.07112 |
| 33.78488 | 33.69437 | 33.71498 | 34.05924 | 34.12232 | 34.02663 | 33.79459 | 33.81383 | 33.71498 |
| 34.10681 | 33.95913 | 34.15285 | 34.16788 | 34.16788 | 34.24785 | 34.03485 | 34.00169 | 34.02663 |
| 31.14224 | 31.16039 | 31.08005 | 30.86821 | 30.89735 | 30.84595 | 30.69644 | 30.74535 | 30.65438 |
| 29.16997 | 29.4073  | 29.12879 | 29.43738 | 29.509   | 29.49762 | 29.1795  | 29.24218 | 29.27586 |
| 29.96774 | 30.19601 | 30.09899 | 30.61982 | 30.71293 | 30.71293 | 29.83092 | 29.82183 | 29.7162  |
| 33.47024 | 32.83092 | 33.47024 | 33.69437 | 33.7751  | 33.68395 | 33.56411 | 33.75533 | 33.54121 |
| 29.33031 | 29.48232 | 29.32817 | 29.6372  | 29.44134 | 29.59156 | 29.58441 | 29.44727 | 29.41941 |
| 29.35363 | 29.5389  | 29.41135 | 29.26472 | 29.21928 | 29.20303 | 29.09396 | 29.26919 | 29.12139 |
| 29.88577 | 30.06085 | 29.83244 | 29.92592 | 29.96774 | 29.95394 | 30.36202 | 30.26472 | 30.33031 |
| 28.60399 | 28.99226 | 28.54628 | 28.80193 | 28.68979 | 28.61456 | 29.58441 | 29.4073  | 29.28692 |
| 29.61632 | 29.54812 | 29.55179 | 29.80962 | 29.82487 | 29.71947 | 29.95394 | 29.99496 | 29.92592 |
| 28.52776 | 28.58978 | 28.43539 | 28.7162  | 28.66289 | 28.76446 | 28.63547 | 28.56456 | 28.57903 |
| 26.35448 | 26.43619 | 25.77706 | 26.90885 | 26.77706 | 26.61807 | 29.13369 | 28.74535 | 29.48999 |
| 30.51089 | 30.6372  | 30.57542 | 30.30878 | 30.31959 | 30.35153 | 31.14224 | 31.10525 | 31.0414  |
| 32.82904 | 32.9574  | 32.86267 | 32.76129 | 32.81383 | 32.77706 | 31.76525 | 31.7692  | 31.80039 |
| 33.33031 | 33.44579 | 33.43341 | 33.36984 | 33.24785 | 33.31689 | 31.91883 | 32.01505 | 31.87921 |
| 32.4775  | 32.57768 | 32.65651 | 33.11613 | 33.08797 | 33.10212 | 31.81192 | 31.74134 | 31.72517 |
| 29.84595 | 30.08639 | 29.94    | 30.19601 | 30.11148 | 30.14831 | 30.24218 | 30.14831 | 30.21928 |
| 29.22389 | 29.46879 | 29.20769 | 28.70965 | 28.62157 | 28.70636 | 29.34308 | 29.21002 | 29.391   |
| 28.44727 | 28.63893 | 28.48616 | 28.86231 | 28.79885 | 28.64924 | 27.94838 | 28.02433 | 27.9428  |
| 30.82335 | 31.01505 | 30.92592 | 31.16639 | 31.26472 | 31.20186 | 30.84595 | 30.84595 | 30.69644 |
| 32.36463 | 32.42592 | 32.49429 | 32.14224 | 32.18423 | 32.17236 | 32.54812 | 32.40578 | 32.55041 |
| 28.97596 | 29.00035 | 28.92592 | 28.86821 | 28.81726 | 28.94838 | 28.70636 | 28.5969  | 28.57181 |
| 30.41337 | 30.60222 | 30.52962 | 30.00838 | 29.95394 | 29.98142 | 28.72598 | 28.66966 | 28.85043 |
| 31.74134 | 31.91883 | 31.75732 | 31.31419 | 31.24785 | 31.28692 | 29.45317 | 29.3869  | 29.60929 |
| 29.37451 | 29.52402 | 29.22159 | 29.44134 | 29.33671 | 29.3452  | 29.98142 | 29.86083 | 29.92592 |
| 29.27586 | 29.43936 | 29.30661 | 29.77077 | 29.71129 | 29.60045 | 29.92592 | 29.7162  | 29.84745 |
| 28.05569 | 28.27142 | 28.08132 | 28.39509 | 28.21697 | 28.23535 | 28.47846 | 28.58262 | 28.31959 |
| 29.18423 | 29.16997 | 29.22159 | 29.06343 | 29.22849 | 29.13124 | 29.70471 | 29.66628 | 29.68479 |
| 28.75494 | 28.91171 | 28.72598 | 28.60399 | 28.58262 | 28.61456 | 28.52028 | 28.66628 | 28.44727 |
| 31.97117 | 32.06407 | 32.08322 | 32.2135  | 32.22791 | 32.2814  | 32.06728 | 32.04466 | 31.95394 |
| 29.35993 | 29.2535  | 29.2007  | 29.36411 | 29.48999 | 29.53148 | 29.75653 | 29.99496 | 29.83846 |
| 30.82335 | 30.93298 | 30.69644 | 31.38278 | 31.39305 | 31.39816 | 31.43837 | 31.34096 | 31.40324 |
| 31.48712 | 31.55728 | 31.57091 | 32.13919 | 32.26472 | 32.29242 | 32.61105 | 32.69851 | 32.53194 |
| 31.39305 | 31.34096 | 31.40324 | 31.77706 | 31.75732 | 31.84595 | 31.45807 | 31.56638 | 31.5389  |
| 32.79266 | 32.91883 | 32.82904 | 32.7272  | 32.81955 | 32.78098 | 31.67976 | 31.74935 | 31.73328 |

|          |          |          |          |          |          |          |          |          |
|----------|----------|----------|----------|----------|----------|----------|----------|----------|
| 31.29242 | 31.28692 | 31.16039 | 31.16039 | 31.17831 | 31.14831 | 29.67472 | 29.64238 | 29.52776 |
| 28.84446 | 28.94559 | 28.83244 | 28.60399 | 28.51653 | 28.54259 | 29.30008 | 29.39305 | 29.41538 |
| 26.93157 | 26.23535 | 27.29789 | 27.34942 | 26.71293 | 26.76446 | 28.39509 | 29.04009 | 28.57903 |
| 29.46684 | 29.44727 | 29.35153 | 29.104   | 29.18187 | 29.13614 | 29.32603 | 29.13124 | 29.16997 |
| 27.34096 | 27.34096 | 26.86231 | 27.32389 | 27.13124 | 26.95394 | 27.96499 | 27.89157 | 27.92592 |
| 32.64796 | 32.3802  | 32.71088 | 32.9574  | 33.02663 | 32.66076 | 25.77706 | 25.93832 | 26.51803 |
| 30.68813 | 30.83092 | 30.52962 | 30.4919  | 30.52028 | 30.52962 | 28.45513 | 28.35363 | 28.31959 |
| 35.83281 | 36.01837 | 35.86544 | 35.72517 | 35.70985 | 35.66023 | 34.13001 | 34.03403 | 34.03485 |
| 31.78097 | 31.78488 | 31.77313 | 32.21928 | 32.2135  | 32.25068 | 31.86083 | 31.8347  | 31.88649 |
| 31.28692 | 31.35153 | 31.31959 | 31.61544 | 31.66289 | 31.69229 | 31.45317 | 31.38278 | 31.52962 |
| 27.3662  | 27.67976 | 27.29789 | 27.55362 | 27.43936 | 27.39917 | 28.89157 | 28.89157 | 28.90598 |
| 32.27309 | 32.37762 | 32.20186 | 32.12078 | 32.14224 | 32.19308 | 29.67472 | 29.66119 | 29.67472 |
| 30.09899 | 29.99496 | 30.04791 | 30.03486 | 29.89735 | 30.13614 | 30.08639 | 30.14831 | 30.02168 |
| 28.81726 | 29.01903 | 28.86526 | 29.33245 | 29.12633 | 29.19131 | 27.58978 | 27.85043 | 27.62506 |
| 28.37451 | 28.41941 | 28.42342 | 28.43141 | 28.47073 | 28.42742 | 26.9428  | 27.22619 | 27.75175 |
| 29.3452  | 29.37865 | 29.30878 | 29.1866  | 29.42542 | 29.2803  | 29.43936 | 29.65949 | 29.29351 |
| 29.02168 | 29.17236 | 29.01372 | 28.78955 | 28.80193 | 28.71293 | 29.27142 | 29.35363 | 29.38895 |
| 29.48999 | 29.59868 | 29.57723 | 29.76129 | 29.78176 | 29.77077 | 30.18423 | 30.13614 | 30.13614 |
| 31.82335 | 31.80809 | 31.7692  | 31.70882 | 31.68395 | 31.7211  | 31.34096 | 31.2535  | 31.41337 |
| 27.71947 | 26.80193 | 27.11148 | 26.83846 | 27.08132 | 26.89735 | 27.77077 | 27.71293 | 27.72598 |
| 31.61982 | 31.65864 | 31.54352 | 31.21928 | 31.28692 | 31.2814  | 31.52028 | 31.37762 | 31.37762 |
| 26.44095 | 23.56384 | 26.65949 | 26.30138 | 26.28207 | 26.30835 | 29.60222 | 29.33458 | 29.34096 |
| 29.89302 | 30.78488 | 29.96774 | 30.96086 | 29.72923 | 29.84296 | 19.92434 | 22.98815 | 21.78756 |
| 31.13614 | 31.27586 | 31.22504 | 31.4919  | 31.61544 | 31.5527  | 31.22504 | 31.25912 | 31.23078 |
| 30.08639 | 30.18423 | 30.12386 | 30.21928 | 30.33031 | 30.27586 | 28.09648 | 28.24445 | 28.11148 |
| 31.45317 | 31.30334 | 31.45807 | 31.81955 | 31.74535 | 31.80809 | 31.52496 | 31.46782 | 31.53427 |
| 28.82031 | 29.01903 | 28.83244 | 28.77392 | 28.96224 | 28.75494 | 29.69478 | 29.71457 | 29.76604 |
| 33.35678 | 33.38278 | 33.48232 | 33.05278 | 32.96086 | 32.90455 | 32.79071 | 32.98651 | 32.85712 |
| 31.29789 | 31.43837 | 31.37244 | 31.30334 | 31.19013 | 31.20769 | 31.08005 | 31.02828 | 31.0927  |
| 30.16039 | 30.11148 | 30.24218 | 29.78488 | 29.87262 | 29.89735 | 27.19835 | 27.82639 | 28.15557 |
| 29.53148 | 29.52962 | 29.66628 | 29.54628 | 29.69975 | 29.60399 | 30.14831 | 30.18423 | 30.17236 |
| 30.26472 | 30.45317 | 30.36202 | 29.92592 | 29.94    | 30.02168 | 29.85638 | 29.75812 | 29.89735 |
| 28.42742 | 28.72923 | 28.15557 | 28.43936 | 28.85043 | 28.39917 | 29.19601 | 28.69312 | 29.05051 |
| 28.37865 | 28.70965 | 28.06085 | 28.47846 | 28.51653 | 28.35783 | 27.72598 | 27.44727 | 27.34942 |
| 29.08132 | 29.48808 | 29.21466 | 29.55545 | 29.32389 | 29.45709 | 29.71293 | 29.71784 | 29.43539 |
| 30.62854 | 30.59335 | 30.46295 | 31.2814  | 31.34625 | 31.37244 | 31.46782 | 31.48712 | 31.53427 |
| 29.03223 | 28.86231 | 28.81726 | 29.35153 | 29.40527 | 29.52962 | 28.71293 | 28.88285 | 28.70965 |
| 28.11148 | 28.30226 | 28.10149 | 28.13124 | 28.18896 | 28.258   | 28.51653 | 28.56456 | 28.63201 |
| 29.08639 | 29.18896 | 28.87115 | 29.37865 | 29.47846 | 29.34942 | 32.03485 | 32.00169 | 32.02499 |
| 29.92592 | 30.06085 | 29.91171 | 29.72923 | 29.91171 | 29.86526 | 29.10899 | 29.07368 | 29.08639 |
| 29.1866  | 29.35993 | 29.0531  | 28.63547 | 28.65949 | 28.509   | 29.50332 | 29.26919 | 29.28692 |
| 31.64151 | 31.65864 | 31.71293 | 31.77313 | 31.87555 | 31.93298 | 31.62418 | 31.64151 | 31.65864 |
| 30.28692 | 30.44332 | 30.4334  | 30.98821 | 30.94698 | 30.91883 | 29.19131 | 29.24218 | 29.34308 |
| 29.18896 | 29.26919 | 29.21697 | 29.96774 | 29.91171 | 29.91171 | 29.88722 | 29.7911  | 29.81421 |
| 30.83846 | 30.94    | 31.0414  | 30.85341 | 30.83846 | 30.94    | 30.96086 | 31.0414  | 30.86821 |
| 30.02168 | 30.16039 | 30.02168 | 29.79885 | 29.80039 | 29.84146 | 28.74855 | 28.76129 | 28.87701 |
| 28.0296  | 28.41941 | 28.16997 | 27.83244 | 27.67976 | 27.83244 | 30.12386 | 30.04791 | 29.89735 |
| 30.44332 | 30.45317 | 30.46295 | 30.23078 | 30.2535  | 30.2535  | 29.99496 | 29.95394 | 29.84595 |
| 29.76129 | 29.78332 | 29.71457 | 29.63374 | 29.6372  | 29.73085 | 28.83244 | 28.62854 | 28.85638 |
| 30.18423 | 30.13614 | 30.2535  | 30.5389  | 30.46295 | 30.46295 | 30.87555 | 30.88285 | 30.86821 |
| 30.59335 | 30.62854 | 30.80039 | 30.27586 | 30.23078 | 30.24218 | 30.26472 | 30.35153 | 30.30878 |
| 28.01903 | 28.14102 | 28.09648 | 28.13614 | 28.23991 | 28.13614 | 28.43141 | 28.5389  | 28.68646 |
| 27.68646 | 27.18896 | 27.44727 | 27.13124 | 27.27142 | 27.43141 | 28.52028 | 28.41538 | 28.53519 |
| 28.84745 | 29.13858 | 29.03486 | 29.26696 | 29.27586 | 29.34096 | 29.42342 | 29.43141 | 29.45513 |
| 28.86821 | 29.08639 | 28.91741 | 28.88285 | 28.91741 | 28.85935 | 28.46684 | 28.48999 | 28.4746  |
| 27.66628 | 27.67303 | 27.90885 | 28.92875 | 29.0427  | 28.88867 | 29.64753 | 29.74214 | 29.55179 |
| 28.18423 | 28.21697 | 28.14589 | 28.38278 | 28.41135 | 28.56819 | 29.27586 | 29.21466 | 29.13614 |
| 34.23363 | 34.09113 | 34.52962 | 33.78488 | 33.82335 | 33.84221 | 32.67766 | 32.75334 | 32.81    |
| 34.42091 | 34.41463 | 34.48832 | 34.49429 | 34.58665 | 34.61982 | 33.89735 | 34.03485 | 30.00169 |
| 29.42342 | 29.59868 | 29.41135 | 29.4919  | 29.43539 | 29.5389  | 29.57001 | 29.47846 | 29.43141 |
| 33.68395 | 33.33031 | 33.73529 | 33.06728 | 33.07846 | 32.90992 | 31.36724 | 31.39816 | 31.40832 |
| 28.40324 | 28.36202 | 28.35783 | 28.5862  | 28.34942 | 28.33245 | 28.94559 | 28.78019 | 28.89735 |
| 28.48232 | 28.29789 | 28.19835 | 28.19366 | 28.16519 | 28.00838 | 28.73247 | 28.85638 | 28.64581 |
| 27.42342 | 28.34942 | 27.47073 | 28.22619 | 28.15074 | 28.29789 | 25.03591 | 25.33756 | 25.45199 |
| 27.92592 | 28.04531 | 28.04009 | 28.21697 | 28.36202 | 28.09144 | 28.64581 | 28.65267 | 28.75494 |
| 27.89735 | 28.13614 | 27.83244 | 28.19835 | 28.29789 | 28.16997 | 28.48616 | 28.46295 | 28.391   |
| 29.64924 | 29.4453  | 29.52962 | 29.3869  | 29.4512  | 29.40121 | 29.7973  | 29.74535 | 29.72923 |
| 27.98685 | 28.19366 | 27.95947 | 28.02433 | 27.88577 | 28.0296  | 29.4334  | 29.60929 | 29.41337 |
| 28.57542 | 28.93438 | 28.52776 | 28.62506 | 28.63547 | 28.65267 | 28.75175 | 28.4746  | 28.4746  |
| 29.33245 | 29.55362 | 29.41337 | 29.40527 | 29.43539 | 29.33884 | 28.75812 | 28.85638 | 28.81115 |
| 28.44332 | 28.43936 | 28.75175 | 28.65608 | 28.3869  | 28.29351 | 26.1776  | 27.14102 | 26.86231 |
| 31.18423 | 31.34096 | 31.16639 | 31.93649 | 31.92592 | 31.91528 | 31.56184 | 31.57091 | 31.50142 |
| 30.83092 | 31.08639 | 30.93298 | 30.72923 | 30.80809 | 30.67976 | 30.67976 | 30.61105 | 30.60222 |
| 28.27586 | 28.65949 | 28.3869  | 28.26696 | 28.31095 | 28.24445 | 27.91456 | 28.23991 | 27.93719 |
| 29.16997 | 29.44727 | 29.21928 | 28.87701 | 28.82941 | 28.95116 | 29.32817 | 29.45905 | 29.31095 |
| 31.34096 | 31.43837 | 31.40324 | 31.51089 | 31.50142 | 31.40324 | 30.4334  | 30.33031 | 30.4334  |
| 29.94    | 30.20769 | 29.91171 | 29.96774 | 29.86378 | 29.82639 | 31.41337 | 31.32496 | 31.30334 |
| 29.02168 | 28.99496 | 29.10899 | 28.7162  | 28.56092 | 28.68311 | 28.49762 | 28.54995 | 28.5389  |
| 30.84595 | 31.04791 | 30.89012 | 30.7211  | 30.7211  | 30.70471 | 30.83846 | 30.61982 | 30.6372  |
| 29.09396 | 29.01903 | 29.02697 | 28.81115 | 28.76762 | 28.72273 | 29.92592 | 29.92592 | 29.83394 |
| 25.85994 | 27.10149 | 26.73892 | 27.22619 | 27.21697 | 26.57542 | 28.45513 | 29.35153 | 28.7162  |
| 27.5389  | 27.77706 | 27.47846 | 27.80809 | 27.74535 | 28.02433 | 29.4174  | 29.17236 | 29.31095 |
| NaN      | 23.1379  | NaN      | NaN      | NaN      | NaN      | 27.86821 | 27.9428  | 28.65267 |
| 32.37762 | 32.41589 | 32.34096 | 31.79266 | 32.00169 | 31.92945 | 32.0414  | 32.11148 | 32.2106  |
| 29.39305 | 29.59156 | 29.30226 | 29.20536 | 29.07623 | 28.98956 | 28.85935 | 28.90024 | 28.71947 |
| 32.08004 | 32.15134 | 32.08322 | 31.85341 | 31.93298 | 31.82714 | 31.88649 | 31.75732 | 31.84595 |
| 31.25912 | 30.83092 | 31.37244 | 31.12386 | 31.11768 | 31.20186 | 31.53427 | 31.60664 | 31.56638 |
| 28.86821 | 28.92309 | 28.76762 | 29.0531  | 29.18423 | 29.04531 | 29.11644 | 29.06343 | 29.10649 |

|          |          |          |          |          |          |          |          |          |
|----------|----------|----------|----------|----------|----------|----------|----------|----------|
| 27.43936 | 27.66628 | 27.28912 | 27.69975 | 27.67303 | 27.57542 | 29.22849 | 29.31959 | 29.30226 |
| 27.90885 | 28.43539 | 28.14589 | 28.09648 | 28.22619 | 27.99226 | 28.08132 | 27.95947 | 28.00838 |
| 29.11148 | 29.07623 | 29.13369 | 28.83545 | 28.92592 | 28.96499 | 29.35993 | 29.4649  | 29.41538 |
| 29.02433 | 29.13369 | 28.86231 | 29.18187 | 29.35363 | 29.24445 | 29.13614 | 29.16039 | 29.06856 |
| 28.35363 | 28.51277 | 28.42742 | 28.90024 | 28.87701 | 29.01372 | 28.83545 | 28.93438 | 28.74535 |
| 28.56819 | 28.65949 | 28.61456 | 28.91171 | 28.91456 | 28.93438 | 29.84894 | 29.87115 | 29.83996 |
| 29.82487 | 30.04791 | 29.91171 | 29.69146 | 29.76288 | 29.91171 | 29.42142 | 29.53519 | 29.49381 |
| 29.88285 | 29.8814  | 29.70141 | 29.98142 | 30.00838 | 30.00838 | 30.35153 | 30.24218 | 30.29789 |
| 30.09899 | 30.17236 | 30.14831 | 31.0927  | 31.19013 | 31.15436 | 30.81574 | 30.57542 | 30.81574 |
| 29.80193 | 29.76762 | 29.83996 | 29.60929 | 29.65438 | 29.72273 | 29.63027 | 29.54075 | 29.52589 |
| 27.45513 | 27.80193 | 27.45513 | 27.52402 | 27.67303 | 27.61105 | 29.27808 | 29.25124 | 29.16279 |
| 26.57542 | 26.64581 | 26.85043 | 26.64581 | 26.92025 | 26.53297 | 27.30661 | 27.30661 | 27.13124 |
| 28.87115 | 29.37036 | 28.80809 | 28.92592 | 28.45513 | 28.15074 | 28.13614 | 27.22619 | 26.58978 |
| 28.4512  | 28.58262 | 28.29789 | 28.22619 | 28.43141 | 28.509   | 28.64581 | 29.08132 | 28.76129 |
| 27.47846 | 27.62506 | 27.50142 | 27.78955 | 27.80193 | 27.85638 | 28.08639 | 27.98142 | 28.11644 |
| 26.89735 | 27.18896 | 26.75175 | 27.2803  | 27.37451 | 27.22619 | 27.58978 | 27.48616 | 27.79576 |
| 29.7597  | 29.96774 | 29.7973  | 29.55728 | 29.56456 | 29.4334  | 29.0427  | 28.96224 | 29.13858 |
| 32.66076 | 32.69437 | 32.76722 | 32.68395 | 32.6372  | 32.79459 | 29.09144 | 28.53148 | 28.95947 |
| 29.06085 | 29.23535 | 29.09144 | 28.90885 | 28.88867 | 28.85638 | 28.35783 | 28.48232 | 28.51277 |
| 30.47267 | 30.58441 | 30.62854 | 31.20769 | 31.28692 | 31.24218 | 30.4334  | 30.42342 | 30.38278 |
| 31.69229 | 31.75732 | 31.82714 | 32.55728 | 32.56865 | 32.5038  | 31.57542 | 31.54352 | 31.60664 |
| 31.24218 | 31.23649 | 31.32496 | 30.83846 | 30.77706 | 30.71293 | 29.66458 | 29.40527 | 29.59335 |
| 30.29789 | 30.54812 | 30.42342 | 30.24218 | 30.34096 | 30.37244 | 30.31959 | 30.47267 | 30.35153 |
| 30.48232 | 30.54812 | 30.51089 | 30.4334  | 30.51089 | 30.4334  | 30.16039 | 30.27586 | 30.33031 |
| 31.0414  | 31.16639 | 30.98821 | 31.0927  | 31.09899 | 30.98142 | 31.26472 | 31.20769 | 31.12386 |
| 29.22159 | 29.30008 | 29.13614 | 29.2957  | 29.37036 | 29.37036 | 28.99226 | 29.02697 | 28.87701 |
| 28.51653 | 28.69644 | 28.40324 | 30.30878 | 30.45317 | 30.18423 | 31.73328 | 31.67556 | 31.6501  |
| 28.78644 | 29.19131 | 28.80809 | 28.37865 | 28.97869 | 28.68311 | 26.17379 | 25.68378 | 25.66221 |
| 30.44332 | 30.57542 | 30.52028 | 30.00838 | 30.02168 | 30.00838 | 29.92592 | 29.86673 | 29.91171 |
| 29.13369 | 29.26919 | 29.1866  | 29.26919 | 29.36202 | 29.31095 | 29.99496 | 29.86231 | 29.92592 |
| 28.75494 | 28.95671 | 28.68311 | 28.72923 | 28.69644 | 28.70636 | 29.30878 | 29.19131 | 29.20536 |
| 30.57542 | 30.81574 | 30.52028 | 30.45317 | 30.50142 | 30.35153 | 30.00838 | 30.02168 | 29.98142 |
| 28.18896 | 27.41538 | 27.16997 | 29.18423 | 29.13614 | 29.23991 | 22.52133 | 22.99162 | 23.04093 |
| 31.38792 | 31.44332 | 31.46782 | 31.61982 | 31.69644 | 31.68813 | 30.66289 | 30.61105 | 30.67976 |
| 28.83244 | 29.07623 | 28.87994 | 29.0531  | 29.19601 | 29.0531  | 29.09144 | 28.93157 | 28.90311 |
| 32.92592 | 32.90455 | 33.03321 | 32.74334 | 32.82714 | 32.81574 | 32.69851 | 32.74735 | 32.71088 |
| 28.04531 | 28.53519 | 28.09144 | 27.9428  | 28.06599 | 28.08132 | 28.41135 | 28.43936 | 28.20769 |
| 29.13858 | 29.11892 | 29.17712 | 29.46684 | 29.59513 | 29.56819 | 29.08132 | 29.04531 | 29.11396 |
| 28.34096 | 28.64581 | 28.49762 | 28.63201 | 28.62157 | 28.82941 | 28.75494 | 28.77392 | 28.78332 |
| 25.42342 | 26.26964 | 25.82396 | 21.91707 | 19.74878 | 21.98815 | 31.29789 | 31.22504 | 31.51089 |
| 29.83244 | 29.99496 | 29.84146 | 29.36411 | 29.27808 | 29.40324 | 28.12633 | 28.23078 | 28.23535 |
| 31.35153 | 31.2814  | 31.39816 | 30.69644 | 30.72923 | 30.87555 | 28.78019 | 28.91741 | 28.74535 |
| 31.22504 | 31.39305 | 31.33031 | 31.61544 | 31.61544 | 31.63288 | 31.42842 | 31.39305 | 31.52496 |
| 28.10649 | 27.98685 | 28.07623 | 28.07112 | 28.00838 | 28.14102 | 28.32817 | 28.90311 | 28.39917 |
| 28.08132 | 28.22619 | 27.83846 | 28.11148 | 28.18896 | 28.06599 | 28.68979 | 28.7357  | 28.61456 |
| 28.01372 | 28.15074 | 28.22619 | 28.03486 | 27.82639 | 27.78332 | 27.65267 | 27.91456 | 27.66628 |
| 29.03486 | 29.25124 | 29.06085 | 28.63201 | 28.6764  | 28.56092 | 28.15557 | 28.24445 | 28.11644 |
| 27.26249 | 27.29789 | 27.27142 | 27.21697 | 27.21697 | 27.48616 | 27.14102 | 27.13124 | 26.99766 |
| 29.61807 | 29.51841 | 29.54812 | 29.59513 | 29.5969  | 29.48808 | 29.98142 | 30.00838 | 29.91171 |
| 30.07368 | 30.28692 | 30.06085 | 30.82335 | 30.89735 | 30.81574 | 30.52028 | 30.44332 | 30.54812 |
| 28.34942 | 28.4512  | 28.2535  | 27.75175 | 27.65949 | 27.87994 | 28.04009 | 27.9428  | 28.10649 |
| 29.34731 | 29.42142 | 29.21002 | 29.43936 | 29.38895 | 29.40324 | 28.43936 | 28.31527 | 28.34942 |
| 27.56819 | 28.29789 | 28.16039 | 28.49381 | 28.68979 | 28.47846 | 24.58118 | 25.66763 | 24.06907 |
| 28.16519 | 28.2535  | 28.08132 | 27.98142 | 27.88577 | 27.79576 | 28.0296  | 28.09144 | 27.95947 |
| 32.01837 | 32.08639 | 32.15738 | 32.03157 | 31.88649 | 32.02168 | 31.76129 | 31.78097 | 31.90813 |
| 31.30334 | 31.47267 | 31.42842 | 31.22504 | 31.27031 | 31.01505 | 31.77313 | 31.67976 | 31.69644 |
| 28.31959 | 28.5389  | 28.47073 | 28.70965 | 28.73247 | 28.71947 | 29.30443 | 29.258   | 29.29351 |
| 27.33245 | 27.3662  | 27.10149 | 27.64581 | 27.77706 | 27.67976 | 28.11148 | 28.00303 | 28.12139 |
| 28.73247 | 28.75812 | 28.82335 | 28.87994 | 28.90024 | 29.00035 | 29.28692 | 29.16279 | 29.21002 |
| 29.461   | 29.5591  | 29.52776 | 29.30443 | 29.26024 | 29.32603 | 30.90455 | 31.00169 | 30.83092 |
| 29.73892 | 29.87555 | 29.80193 | 29.54444 | 29.57542 | 29.55545 | 30.26472 | 30.03486 | 29.96774 |
| 28.07623 | 28.41941 | 28.05569 | 28.21697 | 28.05569 | 28.04531 | 27.68646 | 27.97596 | 27.56092 |
| 29.45317 | 29.45905 | 29.40121 | 30.19601 | 30.30878 | 30.18423 | 29.96774 | 29.94    | 30.00838 |
| 28.06085 | 28.1795  | 28.08639 | 27.90885 | 28.23991 | 28.01903 | 28.29789 | 28.10649 | 28.391   |
| 31.54812 | 31.50142 | 31.51089 | 31.94349 | 31.87188 | 31.92592 | 31.65438 | 31.75334 | 31.65864 |
| 28.89157 | 29.01638 | 28.76446 | 29.19131 | 29.08639 | 29.13124 | 28.99226 | 29.02433 | 28.94838 |
| 28.82941 | 29.14346 | 28.89446 | 29.58441 | 29.48808 | 29.46879 | 28.50142 | 28.41941 | 28.49762 |
| 30.52028 | 30.56638 | 30.61982 | 30.94698 | 30.99496 | 31.03486 | 30.75334 | 30.76129 | 30.85341 |
| 24.65949 | 22.79749 | 22.37518 | 21.9061  | 22.73892 | 24.6811  | 28.08132 | 27.96499 | 27.91456 |
| 27.53148 | 28.13124 | 28.60752 | 26.85043 | 25.99981 | 26.92025 | 23.68646 | 22.97946 | 22.71188 |
| 22.84422 | 24.28207 | NaN      | 22.92434 | 22.1047  | NaN      | 29.62506 | 29.52962 | 29.47846 |
| 29.91171 | 29.96774 | 29.84296 | 29.78644 | 29.76446 | 29.84446 | 28.42342 | 28.49762 | 28.45905 |
| 27.1795  | 27.43141 | 27.21697 | 27.43936 | 27.33245 | 27.24445 | 27.75812 | 27.92592 | 27.79576 |
| 28.06085 | 28.26696 | 27.65949 | 28.31095 | 28.40324 | 28.30226 | 27.509   | 27.34942 | 27.391   |
| 27.69975 | 28.62506 | 28.22619 | 28.37036 | 27.83244 | 28.08132 | 30.48232 | 30.72923 | 30.57542 |
| 28.08639 | 28.21697 | 28.13614 | 28.88577 | 28.76129 | 28.79576 | 28.92875 | 29.09648 | 28.98956 |
| 28.97869 | 28.49381 | 28.97596 | 28.86231 | 28.84146 | 28.90885 | 29.15798 | 28.93719 | 29.08639 |
| 27.23535 | 27.13124 | 27.07112 | 27.52402 | 27.55362 | 27.56819 | 27.63201 | 27.52402 | 27.2803  |
| 28.69644 | 28.69975 | 28.51653 | 28.48232 | 28.5969  | 28.47846 | 28.54628 | 28.54628 | 28.63201 |
| 27.89157 | 28.04531 | 27.89735 | 27.31527 | 27.47073 | 27.55362 | 28.3869  | 28.21234 | 28.31527 |
| 28.51653 | 28.31527 | 28.33245 | 28.74214 | 28.78955 | 28.70965 | 28.63893 | 28.9428  | 28.68646 |
| 30.29789 | 30.29789 | 30.40324 | 30.79266 | 30.76129 | 30.69644 | 31.17831 | 31.24218 | 31.22504 |
| 30.67976 | 30.72923 | 30.75334 | 31.04791 | 31.17831 | 31.23649 | 30.91171 | 31.00838 | 30.88285 |
| 32.34625 | 32.35941 | 32.38278 | 31.25912 | 31.31419 | 31.33565 | 30.47267 | 30.52962 | 30.4919  |
| 30.40324 | 30.33031 | 30.40324 | 30.38278 | 30.18423 | 30.2535  | 30.74535 | 30.52962 | 30.62854 |
| 31.47267 | 31.59779 | 31.47267 | 31.8347  | 31.85341 | 31.88285 | 31.74935 | 31.66712 | 31.74535 |
| 28.55728 | 28.58978 | 28.48999 | 29.32174 | 29.27586 | 29.22849 | 28.90885 | 28.84745 | 28.81421 |
| 28.62157 | 28.67303 | 28.64924 | 28.87994 | 28.95116 | 28.98685 | 29.22159 | 29.09648 | 29.04531 |

|          |          |          |          |          |          |          |          |          |
|----------|----------|----------|----------|----------|----------|----------|----------|----------|
| 29.98142 | 30.17236 | 30.14831 | 29.83545 | 29.88867 | 29.98142 | 29.58978 | 29.708   | 29.6372  |
| 31.7211  | 31.85712 | 31.71293 | 31.89374 | 31.87188 | 31.88649 | 31.52028 | 31.44332 | 31.50142 |
| 29.74053 | 29.66628 | 29.42142 | 30.44332 | 30.42342 | 30.38278 | 30.64581 | 30.51089 | 30.52028 |
| 31.57091 | 31.57993 | 31.52962 | 31.83846 | 31.80039 | 31.76129 | 31.51559 | 31.47267 | 31.61982 |
| 30.83846 | 30.95394 | 30.98142 | 31.01505 | 31.02168 | 30.99496 | 30.89012 | 30.78488 | 30.94698 |
| 30.16039 | 30.20769 | 30.06085 | 30.66289 | 30.56638 | 30.57542 | 30.94698 | 30.94698 | 31.11148 |
| 28.10149 | 28.29789 | 28.11148 | 28.11148 | 28.24445 | 28.10649 | 27.85638 | 27.89157 | 27.65949 |
| 28.86526 | 29.20769 | 28.99226 | 29.04791 | 28.96499 | 28.96499 | 28.71293 | 28.62157 | 28.5862  |
| 26.76446 | 27.16039 | 26.96499 | 26.93157 | 27.04009 | 26.90885 | 27.5389  | 27.57542 | 27.86231 |
| 28.76446 | 28.79885 | 28.70965 | 28.73892 | 28.75494 | 28.68311 | 28.69644 | 28.64238 | 28.76129 |
| 31.81192 | 31.88285 | 31.7692  | 31.34096 | 31.2535  | 31.30334 | 30.78488 | 30.82335 | 30.79266 |
| 30.87555 | 30.86083 | 30.80809 | 30.54812 | 30.60222 | 30.61982 | 30.40324 | 30.4919  | 30.61105 |
| 28.49762 | 28.5862  | 28.46684 | 28.83846 | 28.85043 | 28.75812 | 28.95947 | 28.80809 | 28.63893 |
| 30.16039 | 30.35153 | 30.11148 | 30.50142 | 30.57542 | 30.50142 | 30.44332 | 30.47267 | 30.28692 |
| 26.2021  | 25.85519 | 25.62923 | 25.85043 | 24.86231 | 25.79699 | 27.47073 | 27.66628 | 27.34096 |
| 29.98142 | 30.20769 | 30.17236 | 29.98142 | 30.03486 | 30.14831 | 30.18423 | 30.03486 | 30.00838 |
| 28.98414 | 29.2535  | 29.05569 | 28.90311 | 28.79576 | 28.74855 | 29.23991 | 29.2957  | 29.09144 |
| 29.4174  | 28.74214 | 28.73892 | 28.391   | 29.36411 | 29.64065 | NaN      | NaN      | NaN      |
| 29.44332 | 29.56819 | 29.37865 | 28.77077 | 28.66966 | 28.64924 | 27.56092 | 27.47846 | 27.69975 |
| 29.89735 | 30.00838 | 30.08639 | 29.99496 | 29.98142 | 30.11148 | 29.62331 | 29.4073  | 29.52776 |
| 27.91456 | 27.99766 | 28.01372 | 28.03486 | 28.00838 | 28.05051 | 27.96499 | 28.02433 | 27.90885 |
| 30.80039 | 30.82335 | 30.68813 | 30.90455 | 30.83846 | 30.91171 | 31.15436 | 31.16039 | 31.04791 |
| 26.26785 | 27.391   | 26.34435 | 26.20769 | 25.80193 | 25.78955 | 26.77706 | 26.78955 | 26.99766 |
| 28.16039 | 28.04009 | 28.24898 | 27.87994 | 27.5389  | 27.82031 | 26.73892 | 26.82639 | 27.26249 |
| 26.99766 | 27.22619 | 27.2803  | 27.57542 | 27.83244 | 27.69312 | 28.72273 | 29.11396 | 28.62157 |
| 28.55362 | 29.01903 | 28.63201 | 28.50142 | 28.69975 | 28.6764  | 30.4919  | 30.39305 | 30.50142 |
| 29.06343 | 29.1866  | 29.26472 | 28.98414 | 29.05051 | 29.01638 | 29.68646 | 29.60752 | 29.82335 |
| 30.37244 | 30.58441 | 30.39305 | 30.59335 | 30.60222 | 30.57542 | 30.80809 | 30.80809 | 30.71293 |
| 27.43936 | 27.5969  | 27.26249 | 27.94838 | 27.83846 | 27.90311 | 27.90885 | 27.85638 | 27.95394 |
| 29.53705 | 29.6441  | 29.53334 | 29.48808 | 29.49762 | 29.61982 | 29.85638 | 29.88431 | 29.92592 |
| 27.99766 | 28.07112 | 28.08132 | 27.47073 | 27.75812 | 27.62506 | 28.65267 | 28.81726 | 28.54628 |
| 30.61105 | 30.78488 | 30.75334 | 30.52962 | 30.50142 | 30.42342 | 30.7211  | 30.60222 | 30.62854 |
| 28.59335 | 28.3869  | 28.37036 | 28.71947 | 28.79266 | 28.82941 | 28.44332 | 28.34942 | 28.29789 |
| 28.75494 | 29.05569 | 28.91456 | 29.10649 | 29.12879 | 29.11892 | 29.03223 | 28.78019 | 28.74535 |
| 31.06085 | 31.10525 | 31.06085 | 31.44825 | 31.40324 | 31.38278 | 31.19013 | 30.96774 | 31.06728 |
| 30.90455 | 30.95394 | 30.94    | 31.2814  | 31.22504 | 31.29242 | 30.74535 | 30.71293 | 30.72923 |
| 32.13614 | 31.88285 | 32.05116 | 31.86452 | 32.00169 | 31.9643  | 31.11148 | 31.35678 | 31.0414  |
| 27.9428  | 28.33245 | 28.12633 | 27.93719 | 28.19835 | 28.12139 | 28.77077 | 28.70965 | 28.69644 |
| 24.10149 | 22.53801 | 24.08537 | 21.7348  | 21.53564 | 22.09184 | 27.93157 | 27.48616 | 27.87408 |
| 27.39917 | 27.53148 | 27.16039 | 27.23535 | 27.2803  | 27.2535  | 27.11148 | 27.00838 | 26.88577 |
| 26.77706 | 26.75175 | 26.51051 | 26.06085 | 26.33586 | 26.37285 | 26.81421 | 26.20769 | 26.78955 |
| 31.91171 | 31.99833 | 31.86821 | 31.63288 | 31.65438 | 31.61544 | NaN      | NaN      | 21.68003 |
| 28.50522 | 28.72923 | 28.52776 | 28.55728 | 28.53148 | 28.50142 | 28.47073 | 28.41135 | 28.67303 |
| 26.14686 | 26.63201 | 26.48001 | 27.4073  | 27.5389  | 27.57542 | 27.35783 | 27.56819 | 27.26249 |
| 30.70471 | 30.55728 | 30.67976 | 31.08005 | 31.13614 | 31.18423 | 31.02168 | 31.02828 | 30.80039 |
| 28.52028 | 28.78955 | 28.57903 | 28.54259 | 28.37451 | 28.391   | 28.39917 | 28.35363 | 28.45513 |
| 27.2803  | 26.76446 | 27.34096 | 27.90311 | 28.20769 | 28.08639 | 28.53148 | 28.42342 | 28.50142 |
| 27.21697 | 27.44727 | 26.98685 | 27.65949 | 27.67976 | 27.82031 | 26.75175 | 26.82639 | 27.06085 |
| 26.86231 | 26.68646 | 25.82153 | 27.07112 | 27.34096 | 27.22619 | 27.22619 | 26.98685 | 27.509   |
| 27.42342 | 27.391   | 27.07112 | 27.08132 | 27.10149 | 26.95394 | 27.58262 | 27.68646 | 27.53148 |
| 27.73247 | 27.79576 | 27.63201 | 27.78955 | 27.95947 | 27.74535 | 28.29351 | 28.05569 | 28.06085 |
| 30.02168 | 29.77549 | 30.07368 | 30.4919  | 30.36202 | 30.51089 | 30.81574 | 30.79266 | 30.89735 |
| 28.04009 | 28.22159 | 28.04009 | 27.75175 | 27.80809 | 27.67976 | 26.89735 | 26.85043 | 26.68646 |
| 29.35993 | 29.36202 | 29.22389 | 29.19601 | 29.14589 | 29.18187 | 29.43738 | 29.4512  | 29.58799 |
| 25.05258 | 25.38113 | 24.47383 | 26.03591 | 26.24627 | 26.05051 | 27.90885 | 27.69312 | 27.98685 |
| 28.53519 | 28.5969  | 28.21697 | 28.74855 | 28.76762 | 28.74535 | 28.73247 | 28.72923 | 28.74535 |
| 28.42742 | 28.55728 | 28.37036 | 28.55362 | 28.61807 | 28.70636 | 28.10649 | 28.22619 | 27.99226 |
| 28.3662  | 28.77077 | 28.41538 | 28.67303 | 28.62854 | 28.66966 | 27.88577 | 28.09144 | 27.58978 |
| 29.07368 | 28.32817 | 28.88285 | 29.63201 | 29.57181 | 29.67303 | 29.00838 | 28.71293 | 28.96774 |
| 28.33671 | 28.31527 | 27.99226 | 28.47073 | 28.61105 | 28.82941 | 29.61807 | 29.66628 | 29.49572 |
| 30.04791 | 30.12386 | 29.96774 | 30.19601 | 30.17236 | 30.18423 | 32.23934 | 32.2106  | 32.2135  |
| NaN      | NaN      | 23.72858 | NaN      | NaN      | NaN      | NaN      | 28.97596 | 29.13614 |
| 28.43539 | 28.72923 | 28.4073  | 28.30661 | 28.4073  | 28.391   | 28.45905 | 28.63547 | 28.46295 |
| 27.76446 | 28.21234 | 27.80809 | 28.391   | 28.5389  | 28.27586 | 28.258   | 28.23535 | 28.35363 |
| 29.10149 | 29.19131 | 29.15074 | 28.84745 | 28.83545 | 28.81421 | 28.29351 | 28.22159 | 28.13614 |
| 28.32817 | 28.89157 | 28.45905 | 28.36202 | 28.91171 | 28.57181 | 26.65949 | 25.59263 | 26.68646 |
| 26.65949 | 27.06085 | 26.61807 | 26.39754 | 26.33074 | 26.28912 | 27.57542 | 27.32389 | 27.51653 |
| 27.07112 | 26.54333 | 26.90885 | 27.2803  | 27.35783 | 27.16997 | 27.16997 | 26.96499 | 27.01903 |
| 26.42502 | 26.54038 | 26.55801 | 26.92025 | 26.77706 | 26.82639 | 26.82639 | 27.57542 | 27.44727 |
| 27.33245 | 27.56092 | 27.46295 | 27.49381 | 27.55362 | 27.41538 | 27.41538 | 27.76446 | 27.58978 |
| 26.26428 | 26.33415 | 26.07521 | 26.08942 | 25.47692 | 25.89041 | 25.93607 | 25.95172 | 26.07112 |
| 29.00571 | 28.79266 | 28.80193 | 28.79885 | 28.76446 | 28.74855 | 28.80501 | 28.95394 | 28.72923 |
| 27.26249 | 27.58262 | 27.35783 | 26.97596 | 27.13124 | 27.12139 | 27.05051 | 26.75175 | 27.16997 |
| 30.65438 | 30.78488 | 30.59335 | 30.93298 | 30.90455 | 31.03486 | 30.86083 | 30.80809 | 30.82335 |
| 30.81574 | 31.0414  | 31.00169 | 30.74535 | 30.70471 | 30.83092 | 31.02168 | 30.96774 | 31.13001 |
| 28.74855 | 28.93157 | 28.83244 | 29.60222 | 29.53148 | 29.52962 | 28.95394 | 28.93157 | 29.05827 |
| 30.12386 | 30.19601 | 29.98142 | 30.14831 | 30.24218 | 30.12386 | 30.36202 | 30.46295 | 30.41337 |
| 29.13124 | 29.04009 | 29.10649 | 29.80039 | 29.77392 | 29.89735 | 30.19601 | 30.08639 | 30.03486 |
| 27.48616 | 27.61105 | 27.53148 | 27.32389 | 27.34096 | 27.14102 | 26.06907 | 26.10749 | 25.97378 |
| 29.27142 | 29.37244 | 29.24445 | 29.104   | 29.13369 | 29.01372 | 29.2803  | 29.20303 | 29.14346 |
| 29.14589 | 29.23535 | 29.34731 | 28.80809 | 28.67976 | 28.89446 | 29.17712 | 29.13614 | 28.87115 |
| 29.8814  | 30.19601 | 30.14831 | 30.07368 | 29.96774 | 30.03486 | 31.80039 | 31.80809 | 31.80039 |
| 28.64924 | 28.63547 | 28.76762 | 28.77077 | 28.79576 | 28.53519 | 28.34942 | 28.16997 | 28.37451 |
| 28.76129 | 28.56819 | 28.78644 | 28.48999 | 28.49762 | 28.4746  | 27.92592 | 27.85043 | 28.09144 |
| 27.00838 | 27.1795  | 26.90885 | 26.87408 | 26.92025 | 26.89735 | 28.52028 | 28.58979 | 28.42742 |
| 29.8279  | 30.00838 | 29.80347 | 29.31527 | 29.45905 | 29.29351 | 27.97049 | 28.14589 | 28.3662  |
| 28.07623 | 28.10649 | 27.80809 | 28.15074 | 28.16997 | 28.04531 | 27.73247 | 27.72598 | 27.75812 |
| 28.01903 | 28.2535  | 28.10149 | 27.90885 | 27.92025 | 28.09144 | 28.69312 | 28.58262 | 28.71947 |

|          |          |          |          |          |          |          |          |          |
|----------|----------|----------|----------|----------|----------|----------|----------|----------|
| 29.32389 | 29.50522 | 29.26024 | 29.30226 | 29.22159 | 29.15557 | 30.07368 | 30.08639 | 29.99496 |
| 29.65438 | 29.87408 | 29.73085 | 29.74053 | 29.77077 | 29.7357  | 28.56456 | 28.258   | 28.49381 |
| 28.18423 | 28.13614 | 28.08132 | 27.93157 | 27.83846 | 28.01372 | 28.50522 | 28.45905 | 28.57181 |
| 29.11892 | 29.2535  | 29.22389 | 29.41538 | 29.4334  | 29.37451 | 29.55179 | 29.44332 | 29.52589 |
| 28.24445 | 28.35783 | 28.3452  | 28.33671 | 28.26696 | 28.19366 | 27.97596 | 27.96499 | 28.14102 |
| 31.16639 | 30.76129 | 31.08005 | 31.35678 | 31.54352 | 31.39305 | 31.17236 | 31.28692 | 31.40832 |
| 30.55728 | 30.6372  | 30.5389  | 30.95394 | 30.89012 | 30.96774 | 30.68813 | 30.6372  | 30.67135 |
| 35.27239 | 35.20478 | 35.2931  | 34.38921 | 34.60885 | 34.48832 | 33.49429 | 33.51794 | 33.50616 |
| 31.83846 | 31.94    | 31.69229 | 31.51089 | 31.58441 | 31.44332 | 30.9746  | 30.95394 | 30.78488 |
| 27.67303 | 27.82031 | 27.54628 | 27.68646 | 27.56819 | 27.64581 | 28.47846 | 28.21697 | 28.56092 |
| 28.37451 | 28.15074 | 28.48616 | 28.53148 | 28.49381 | 28.45905 | 28.11644 | 28.13124 | 28.03486 |
| 27.1795  | 26.52999 | 26.93157 | 26.90885 | 27.10149 | 27.12139 | 27.95947 | 27.71947 | 27.91456 |
| 28.24445 | 28.49381 | 28.20303 | 27.80809 | 28.02433 | 28.0296  | 26.83846 | 26.86231 | 26.83846 |
| 29.69146 | 29.92592 | 29.80809 | 29.49953 | 29.50142 | 29.29351 | 29.62506 | 26.63547 | 29.6441  |
| 28.2803  | 28.54259 | 28.13124 | 28.19366 | 28.17474 | 28.2535  | 28.05051 | 28.11148 | 28.06599 |
| 29.98142 | 29.84296 | 29.96774 | 29.66458 | 29.65608 | 29.61456 | 29.52589 | 29.67808 | 29.67303 |
| 27.07112 | 27.33245 | 26.98685 | 26.51352 | 26.40568 | 26.55508 | 27.13124 | 26.42021 | 27.08132 |
| 27.68646 | 27.75175 | 27.71293 | 28.17474 | 28.14589 | 28.24898 | 28.4073  | 28.3452  | 28.45513 |
| 27.28912 | 27.55362 | 27.18896 | 27.35783 | 27.31527 | 27.2803  | 27.56092 | 27.34942 | 27.44727 |
| 28.05569 | 28.20769 | 27.94838 | 28.64924 | 28.59335 | 28.70636 | 28.44727 | 28.43539 | 28.51653 |
| 27.45513 | 27.49381 | 27.2535  | 27.94838 | 27.93719 | 28.08639 | 27.89735 | 27.85638 | 27.80193 |
| 29.4919  | 29.55362 | 29.48039 | 29.41135 | 29.3452  | 29.41941 | 29.72598 | 29.57542 | 29.56819 |
| 27.97049 | 27.94838 | 27.98685 | 27.77077 | 27.91456 | 28.09144 | 28.3869  | 28.23078 | 28.40324 |
| 27.44727 | 27.98685 | 27.54628 | 27.67976 | 27.77077 | 27.71293 | 26.92025 | 26.90885 | 26.61807 |
| 28.60045 | 28.70636 | 28.55362 | 28.74855 | 28.60045 | 28.77392 | 28.62854 | 28.80501 | 28.68979 |
| 27.09144 | 27.33245 | 27.16997 | 26.7706  | 27.01903 | 27.06085 | 26.2535  | 26.30313 | 26.04843 |
| 26.61807 | 26.75175 | 26.44253 | 26.55508 | 26.22619 | 26.01903 | 26.82639 | 26.85043 | 26.57542 |
| 27.83244 | 28.06085 | 27.97596 | 27.85043 | 27.80193 | 27.65949 | 28.20769 | 28.1795  | 28.21234 |
| 27.61105 | 27.82639 | 27.56092 | 27.89157 | 27.70636 | 27.89735 | 28.1795  | 28.07112 | 28.04531 |
| 27.05051 | 27.1795  | 27.04009 | 27.391   | 27.43141 | 27.42342 | 24.71293 | 25.09748 | 24.73376 |
| 28.34096 | 28.34096 | 28.34942 | 27.62506 | 27.54628 | 27.62506 | 27.05051 | 26.95394 | 27.00838 |
| 27.43141 | 27.43141 | 27.3662  | 27.55362 | 27.57542 | 27.63893 | 27.97596 | 28.32389 | 28.00838 |
| 29.14831 | 29.46879 | 29.22849 | 29.44924 | 29.63027 | 29.4649  | 29.37865 | 29.56819 | 29.4649  |
| 23.70767 | 24.39754 | 23.82881 | 25.48922 | 25.50142 | 25.41377 | 26.52103 | 26.57109 | 26.77706 |
| 24.47383 | 24.63755 | 23.78955 | 25.53445 | 25.60116 | 23.80931 | 26.97596 | 27.55362 | 26.80193 |
| 29.29789 | 29.35783 | 29.49572 | 29.20303 | 29.30226 | 29.42342 | 28.68311 | 28.509   | 28.63893 |
| 26.80193 | 26.96499 | 26.95394 | 27.2803  | 27.53148 | 27.33245 | 26.92025 | 27.18896 | 26.82639 |
| NaN      | NaN      | NaN      | NaN      | NaN      | NaN      | 26.82639 | 26.68646 | 26.69975 |
| 27.67303 | 28.4073  | 28.20303 | 27.58978 | 27.16997 | 27.07112 | 25.73892 | 25.1332  | 24.84805 |
| 28.13614 | 28.24898 | 28.01903 | 27.1795  | 27.31527 | 27.35783 | 28.04009 | 27.79576 | 27.95947 |
| 29.104   | 29.2007  | 29.0296  | 29.53148 | 29.55545 | 29.60929 | 29.69644 | 29.67303 | 29.79885 |
| 28.37036 | 28.37865 | 28.33245 | 27.87408 | 27.89157 | 27.94838 | 28.20303 | 28.01372 | 28.37036 |
| 30.12386 | 30.16039 | 30.08639 | 30.11148 | 30.20769 | 30.19601 | 30.81574 | 30.73731 | 30.76129 |
| NaN      | 22.97771 | 24.04427 | 22.24771 | 22.58233 | 20.48738 | 29.28912 | 30.65438 | 29.24898 |
| 28.31959 | 28.43539 | 28.44727 | 28.47846 | 28.51277 | 28.31527 | 26.67303 | 27.12139 | 27.2535  |
| 29.99496 | 30.12386 | 30.04791 | 29.94    | 29.87408 | 29.84745 | 30.02168 | 29.99496 | 29.99496 |
| 30.51089 | 30.67135 | 30.57542 | 30.84595 | 30.80809 | 30.90455 | 30.47267 | 30.39305 | 30.42342 |
| 27.60399 | 27.58262 | 27.45513 | 27.80193 | 27.95394 | 27.90885 | 28.4512  | 28.24445 | 28.2535  |
| 28.4512  | 28.79266 | 28.34096 | 29.09648 | 29.07368 | 29.11644 | 28.13124 | 28.0296  | 27.95947 |
| 30.96086 | 31.19013 | 31.11768 | 30.92592 | 30.91171 | 30.94698 | 29.12386 | 29.03223 | 29.16279 |
| 28.45513 | 28.80809 | 28.39509 | 28.47073 | 28.57542 | 28.52402 | 29.04791 | 29.11644 | 28.80809 |
| 29.7973  | 29.95394 | 29.79421 | 29.41941 | 29.26024 | 29.30443 | 29.58978 | 29.41337 | 29.60576 |
| 27.54628 | 27.80193 | 27.68646 | 25.4008  | 25.67573 | 25.84086 | 21.50688 | 23.48001 | 21.66709 |
| 29.35363 | 29.43141 | 29.23078 | 29.44332 | 29.39305 | 29.4174  | 28.12633 | 27.98685 | 28.16519 |
| 27.70636 | 27.56092 | 27.50142 | 27.61807 | 27.67303 | 27.94838 | 28.41538 | 28.44332 | 28.33245 |
| 28.95671 | 29.18896 | 28.97049 | 28.45905 | 28.48616 | 28.56819 | 28.88867 | 29.13614 | 28.5638  |
| 29.7597  | 29.92592 | 29.92592 | 29.88577 | 29.98142 | 30.03486 | 30.03486 | 30.11148 | 30.18423 |
| 30.42342 | 30.67135 | 30.59335 | 30.60222 | 30.61105 | 30.55728 | 31.08639 | 31.02168 | 31.03486 |
| 30.86083 | 30.55728 | 30.59335 | 29.72923 | 29.23078 | 29.78176 | 24.24627 | 26.57542 | 24.98033 |
| 26.2553  | 26.20583 | 25.60399 | 26.31527 | 25.6513  | 25.55215 | 26.80193 | 26.50446 | 26.42502 |
| 28.60399 | 28.06599 | 28.24898 | 28.50522 | 28.61105 | 28.66628 | 28.54995 | 28.391   | 28.84146 |
| NaN      | NaN      | NaN      | 23.35111 | NaN      | NaN      | 28.51277 | 28.5969  | 27.70636 |
| 29.61456 | 29.34096 | 29.63893 | 30.16039 | 30.23078 | 30.21928 | 29.66797 | 29.75015 | 30.02168 |
| 29.94    | 30.11148 | 29.94    | 29.59513 | 29.52402 | 29.60752 | 32.30334 | 32.34361 | 32.21928 |
| 28.01372 | 28.01372 | 27.70636 | 27.98142 | 27.99766 | 28.05569 | 27.46295 | 27.45513 | 27.22619 |
| 27.13124 | 27.22619 | 27.06085 | 27.57542 | 27.63201 | 27.62506 | 26.9428  | 26.60399 | 27.04009 |
| 28.92309 | 29.03486 | 28.76446 | 27.391   | 27.39917 | 27.33245 | 28.15557 | 28.28472 | 28.03486 |
| 26.72598 | 27.18896 | 26.77706 | 27.3662  | 26.68646 | 26.64581 | 27.11148 | 27.31527 | 27.19835 |
| 31.42842 | 31.67135 | 31.17236 | 31.70471 | 31.58889 | 31.6372  | 31.46295 | 31.46295 | 31.45317 |
| 30.00838 | 30.19601 | 30.20769 | 29.71457 | 29.68646 | 29.83846 | 29.99496 | 29.83244 | 29.78176 |
| 27.42342 | 26.52552 | 27.26249 | 27.75175 | 27.57542 | 27.69312 | 29.37865 | 29.40324 | 29.19366 |
| 27.64581 | 27.45513 | 27.15074 | 27.53148 | 27.46295 | 27.58262 | 28.01903 | 28.06599 | 27.97596 |
| 29.54995 | 29.79885 | 29.58082 | 29.04791 | 29.13858 | 29.07112 | 29.28251 | 29.18896 | 28.98142 |
| 27.47073 | 27.509   | 27.34942 | 27.3662  | 27.64581 | 27.35783 | 28.12139 | 28.01903 | 28.04009 |
| 27.97596 | 28.07623 | 27.88577 | 27.87408 | 27.96499 | 27.92592 | 28.34096 | 28.15557 | 28.07112 |
| 29.10899 | 29.13124 | 28.95394 | 28.88577 | 28.98956 | 28.85935 | 28.5389  | 28.39509 | 28.44332 |
| 29.31527 | 29.35363 | 29.36411 | 28.94    | 28.90885 | 28.96774 | 28.86821 | 28.99496 | 28.68979 |
| 28.0296  | 28.34096 | 27.84446 | 28.57903 | 28.55362 | 28.62854 | 27.99766 | 27.72598 | 27.84446 |
| 29.41538 | 29.60929 | 29.52589 | 29.4649  | 29.46295 | 29.46684 | 29.4453  | 29.5591  | 29.3869  |
| 25.62923 | 25.36786 | 24.83846 | 25.55508 | 25.62366 | 25.61526 | 26.28912 | 26.93157 | 26.1776  |
| 26.51352 | 26.61807 | 26.40568 | 26.18329 | 26.26607 | 26.3662  | 27.01903 | 26.60399 | 26.77706 |
| 28.43539 | 28.57903 | 28.65267 | 28.54259 | 28.57181 | 28.64924 | 28.22619 | 28.391   | 28.15557 |
| 27.62506 | 27.47846 | 27.73247 | 27.80809 | 27.14102 | 27.27142 | 25.38443 | 22.45262 | 24.85281 |
| 30.00838 | 30.26472 | 30.18423 | 30.02168 | 29.88577 | 29.8549  | 30.02168 | 30.12386 | 30.08639 |
| 27.91456 | 28.20769 | 27.97596 | 27.51653 | 27.72598 | 27.96499 | 24.03591 | 23.79947 | 23.85757 |
| 28.59335 | 28.7162  | 28.68311 | 28.85043 | 28.77077 | 28.97596 | 28.91741 | 28.86821 | 28.90311 |
| 29.01105 | 29.21234 | 29.17236 | 29.4453  | 29.49381 | 29.4919  | 29.34942 | 29.2535  | 29.3452  |
| 28.99496 | 28.61807 | 28.98956 | 27.54628 | 28.00838 | 27.77706 | 23.70767 | 23.63201 | 23.45513 |

|          |          |          |          |          |          |          |          |          |
|----------|----------|----------|----------|----------|----------|----------|----------|----------|
| 31.0927  | 31.0414  | 31.50142 | 30.91171 | 30.88285 | 30.96774 | 32.31149 | 32.44825 | 32.36984 |
| 33.00838 | 33.05924 | 33.15285 | 32.66713 | 32.74535 | 32.70058 | 33.74535 | 33.70471 | 33.65224 |
| 32.5038  | 32.48472 | 32.42342 | 31.89735 | 32.08004 | 31.93649 | 32.16339 | 32.29789 | 32.09585 |
| 38.02433 | 28.0296  | 28.04009 | 27.95947 | 27.84446 | 28.08639 | 28.30661 | 28.3662  | 28.4512  |
| 30.23078 | 30.46295 | 30.35153 | 30.40324 | 30.39305 | 30.35153 | 30.4334  | 30.36202 | 30.41337 |
| 27.2803  | 27.2535  | 27.00838 | 27.47073 | 27.52402 | 27.83244 | 26.61807 | 26.58978 | 26.13712 |
| 22.61414 | 23.68646 | 21.57773 | 21.73066 | 22.48493 | 22.35917 | 28.44332 | 28.47846 | 28.80501 |
| 28.56819 | 28.62157 | 28.35363 | 28.60752 | 28.76762 | 28.66628 | 28.15557 | 28.16997 | 28.10649 |
| 30.52962 | 30.5389  | 30.44332 | 30.26472 | 30.20769 | 30.19601 | 30.00838 | 29.89735 | 29.99496 |
| 29.0296  | 29.16279 | 29.12633 | 29.15074 | 28.93438 | 28.87994 | 29.67472 | 29.7211  | 29.708   |
| 32.71702 | 31.28692 | 32.45562 | 32.86636 | 32.68186 | 33.03321 | 31.74535 | 31.60222 | 31.60222 |
| 28.30661 | 28.68646 | 28.54259 | 28.16519 | 28.24445 | 27.97049 | 23.86703 | 24.09346 | 24.15653 |
| 27.13124 | 27.18896 | 27.20769 | 27.68646 | 27.70636 | 27.56092 | 27.73892 | 27.53148 | 27.60399 |
| 28.85341 | 28.81115 | 28.79885 | 28.5862  | 28.509   | 28.50522 | 26.98685 | 26.88577 | 27.04009 |
| 26.76446 | 26.96499 | 27.24445 | 27.27142 | 27.77706 | 27.43141 | 28.07623 | 28.35783 | 27.99226 |
| 27.51653 | 27.96499 | 27.9428  | 27.41538 | 27.0296  | 26.85043 | 24.1332  | 25.61807 | 24.30313 |
| 28.12139 | 28.2535  | 28.258   | 27.87994 | 27.94838 | 28.13614 | 28.16519 | 27.95394 | 28.24898 |
| NaN      | 23.391   | NaN      | 24.42342 | 22.11108 | 23.37782 | 26.82639 | 27.15074 | 26.95394 |
| 28.06085 | 25.07316 | 28.10649 | 28.65949 | 28.01372 | 28.29351 | 28.97323 | 28.57903 | 29.09144 |
| 26.13907 | 25.99766 | 26.06085 | 25.9157  | 26.36453 | 24.72858 | 26.76446 | 27.3662  | 27.06085 |
| 27.38278 | 27.391   | 27.09144 | 27.95947 | 27.95394 | 27.90885 | 28.11148 | 27.97596 | 28.14589 |
| 25.96719 | 25.88577 | 25.56092 | 26.18139 | 25.73892 | 25.49838 | 26.24989 | 26.85043 | 26.43936 |
| 27.53148 | 27.70636 | 27.391   | 27.97049 | 28.04531 | 27.97049 | 27.16997 | 27.31527 | 27.43936 |
| 27.80193 | 27.74535 | 27.58978 | 27.63893 | 27.70636 | 27.76446 | 27.96499 | 27.78332 | 27.73892 |
| 28.4073  | 28.48616 | 28.32389 | 28.5389  | 28.65267 | 28.56456 | 28.3662  | 28.33671 | 28.37036 |
| 27.00838 | 27.27142 | 27.33245 | 26.76446 | 27.37451 | 26.80193 | 27.38278 | 27.26249 | 27.43141 |
| 29.49953 | 29.30443 | 29.31527 | 29.85341 | 29.91171 | 29.91171 | 28.78955 | 28.98142 | 28.65949 |
| 27.67303 | 28.04531 | 27.73247 | 27.95394 | 27.82031 | 27.75812 | 28.41538 | 28.39509 | 28.52028 |
| 28.61105 | 28.63547 | 28.80193 | 29.0296  | 28.85935 | 28.91456 | 28.82335 | 28.72598 | 28.84446 |
| 26.31354 | 26.42982 | 26.32389 | 27.13124 | 27.16039 | 27.63201 | 28.24898 | 28.26696 | 28.31095 |
| 27.47073 | 27.75812 | 27.01903 | 27.92592 | 28.10649 | 27.93157 | 27.93157 | 28.04531 | 27.92592 |
| 26.87408 | 26.83846 | 26.44884 | 27.07112 | 26.9428  | 26.98685 | 27.27142 | 27.37451 | 27.26249 |
| 30.71293 | 30.52962 | 30.64581 | 30.62854 | 30.61105 | 30.64581 | 28.35783 | 28.45513 | 28.63201 |
| 30.60222 | 30.5389  | 30.70471 | 30.67135 | 30.60222 | 30.52962 | 30.12386 | 30.29789 | 30.11148 |
| 27.63201 | 27.73247 | 27.62506 | 27.95394 | 27.80193 | 27.73247 | 26.75175 | 26.82639 | 26.81421 |
| 27.48616 | 27.35783 | 27.4073  | 27.92025 | 28.03486 | 27.90311 | 27.92025 | 27.85638 | 28.0296  |
| 28.76762 | 28.84146 | 28.84146 | 28.18423 | 28.10149 | 28.20303 | 29.05051 | 28.94559 | 29.05827 |
| 29.22389 | 29.34096 | 29.3452  | 29.24445 | 29.28912 | 29.22849 | 29.31311 | 29.21466 | 29.19835 |
| 26.47228 | 27.0296  | 26.55069 | 26.89735 | 26.89735 | 26.90885 | 27.69312 | 27.24445 | 27.28912 |
| 26.64581 | 27.05051 | 26.87408 | 25.75175 | 25.73376 | 25.92025 | 25.48922 | 25.28912 | 26.18896 |
| 28.43936 | 28.47073 | 28.19366 | 28.08639 | 28.27586 | 28.63547 | 25.81665 | 26.12139 | 25.21697 |
| 26.85043 | 27.00838 | 26.60399 | 27.00838 | 26.80193 | 26.87408 | 25.65676 | 25.97596 | 26.13516 |
| 26.45199 | 27.00838 | 26.61807 | 26.98685 | 26.92025 | 27.12139 | 25.58405 | 26.43778 | 26.0296  |
| 28.57903 | 28.7357  | 28.68646 | 28.75494 | 28.57542 | 28.63547 | 29.33031 | 29.07623 | 29.4334  |
| 27.76446 | 28.07112 | 28.06085 | 27.23535 | 27.30661 | 27.61105 | 22.40406 | 22.86703 | 24.2535  |
| 26.4186  | 26.55069 | 25.77957 | 26.17188 | 26.239   | 26.27853 | 25.38772 | 25.65949 | 26.5949  |
| 26.09949 | 26.40406 | 26.63201 | 26.77706 | 26.78955 | 26.68646 | 26.85043 | 26.68646 | 26.85043 |
| 26.64581 | 26.87408 | 26.72598 | 26.39917 | 26.4008  | 26.55508 | 26.41538 | 26.46607 | 26.33245 |
| 26.31008 | 26.63201 | 26.43301 | 26.43778 | 26.50142 | 26.24264 | 26.78955 | 26.80193 | 26.64581 |
| 31.17236 | 31.27031 | 31.2814  | 31.60664 | 31.50616 | 31.48232 | 31.17831 | 31.09899 | 31.31419 |
| 26.93157 | 27.18896 | 26.90885 | 26.95394 | 26.72598 | 26.82639 | 27.43936 | 27.24445 | 27.391   |
| 27.13124 | 26.73892 | 27.16997 | 27.13124 | 26.93157 | 26.88577 | 27.10149 | 26.88577 | 26.99766 |
| 27.67976 | 28.01903 | 27.80809 | 27.66628 | 27.509   | 27.35783 | 26.86231 | 27.13124 | 27.01903 |
| 32.9574  | 32.96086 | 33.16788 | 32.92415 | 33.03485 | 33.08955 | 30.4919  | 30.40324 | 30.33031 |
| 26.64581 | 26.43619 | 26.47846 | 26.36453 | 26.03171 | 26.08335 | 25.62366 | 25.30313 | 25.40406 |
| 26.82639 | 26.9428  | 26.89735 | 26.55655 | 26.61807 | 26.82639 | 27.44727 | 27.43141 | 27.42342 |
| 28.50142 | 29.11644 | 28.90311 | 28.86821 | 28.85341 | 29.02433 | 29.26249 | 29.45905 | 28.82335 |
| 29.31743 | 29.43141 | 29.24218 | 29.3869  | 29.42142 | 29.53519 | 29.10149 | 28.85638 | 29.01638 |
| 30.88285 | 30.85341 | 30.80809 | 30.74535 | 30.68813 | 30.92592 | 29.75175 | 29.99496 | 29.99496 |
| 30.60222 | 30.72923 | 30.66289 | 30.37244 | 30.37244 | 30.30878 | 29.74214 | 29.51277 | 29.63374 |
| 28.13614 | 28.59335 | 28.09144 | 27.95947 | 27.85638 | 27.64581 | 26.72598 | 26.68646 | 26.78955 |
| 27.71293 | 27.97049 | 27.63201 | 27.54628 | 27.66628 | 27.5389  | 27.89157 | 27.89157 | 28.15074 |
| 28.70965 | 29.04791 | 28.72598 | 28.62157 | 28.64238 | 28.63893 | 29.00838 | 28.80193 | 28.92592 |
| 28.52028 | 28.45513 | 28.48232 | 28.78644 | 29.0296  | 28.85341 | 28.3869  | 28.26696 | 28.41941 |
| 28.4746  | 28.7357  | 28.48616 | 28.79576 | 28.69312 | 28.72273 | 29.23078 | 29.14346 | 29.18423 |
| 29.55728 | 29.87555 | 29.52776 | 29.94    | 30.03486 | 30.03486 | 29.64238 | 29.46295 | 29.54628 |
| 28.81726 | 29.14589 | 28.83545 | 29.24898 | 29.07112 | 29.03748 | 28.05051 | 27.93157 | 27.96499 |
| 31.27031 | 31.38792 | 31.16639 | 30.70471 | 30.70471 | 30.74535 | 30.30878 | 30.41337 | 30.21928 |
| 30.21928 | 30.06085 | 30.20769 | 30.64581 | 30.62854 | 30.56638 | 30.39305 | 30.08639 | 30.28692 |
| 30.54812 | 30.4334  | 30.61982 | 30.79266 | 30.82335 | 31.02168 | 30.66289 | 30.89012 | 30.52028 |
| 29.76762 | 29.33671 | 29.77077 | 30.13614 | 30.18423 | 30.31959 | 29.87848 | 29.87262 | 29.75494 |
| 30.35153 | 29.67976 | 30.37244 | 30.00838 | 29.94    | 30.11148 | 29.73247 | 29.95394 | 29.7692  |
| 30.90455 | 30.89012 | 30.88285 | 30.9746  | 30.94    | 30.96774 | 30.06085 | 30.03486 | 30.04791 |
| 28.68646 | 28.88577 | 28.72923 | 28.37451 | 28.21697 | 28.28472 | 28.76129 | 28.6764  | 28.7357  |
| 26.39754 | 26.33756 | 25.91114 | 25.75685 | 25.51953 | 25.2535  | 26.0041  | 26.77706 | 26.15074 |
| 27.20769 | 27.38278 | 27.28912 | 27.09144 | 27.07112 | 26.97596 | 26.85043 | 26.64581 | 26.78955 |
| 27.45513 | 27.69312 | 27.5389  | 27.57542 | 27.65949 | 27.98142 | 26.35111 | 26.98685 | 26.54333 |
| 29.99496 | 29.98142 | 30.16039 | 29.64065 | 29.6981  | 29.71947 | 29.57903 | 29.65267 | 29.77706 |
| 24.79947 | 25.53445 | 23.96719 | 25.7024  | 26.01903 | 25.88344 | 27.09144 | 27.19835 | 27.16039 |
| 25.56092 | 26.04009 | 25.09346 | 26.01478 | 25.62087 | 25.73376 | 26.0874  | 26.16615 | 26.27853 |
| 30.08639 | 30.26472 | 30.34096 | 29.98142 | 29.94    | 29.88431 | 29.62854 | 29.4512  | 29.57903 |
| 30.04791 | 30.03486 | 30.26472 | 30.16039 | 30.36202 | 30.35153 | 30.68813 | 30.52028 | 30.47267 |
| 27.30661 | 27.43141 | 27.11148 | 26.85043 | 26.99766 | 27.11148 | 27.27142 | 26.98685 | 26.99766 |
| 27.70636 | 27.49381 | 27.78955 | 27.71293 | 27.83244 | 28.06599 | 27.91456 | 28.14589 | 28.07623 |
| 30.29789 | 29.7973  | 30.36202 | 30.52962 | 30.52962 | 30.46295 | 29.06599 | 28.92025 | 29.19835 |
| 28.18423 | 28.07623 | 28.00303 | 28.19835 | 28.17474 | 28.07623 | 28.37036 | 28.2803  | 28.34096 |
| 26.34773 | 26.86231 | 26.32903 | 26.71293 | 26.56819 | 26.72598 | 26.55947 | 26.60399 | 26.38772 |
| 26.24264 | 27.19835 | 26.36786 | 26.96499 | 27.04009 | 26.60399 | 26.88577 | 27.15074 | 26.64581 |

|          |          |          |          |          |          |          |           |          |
|----------|----------|----------|----------|----------|----------|----------|-----------|----------|
| 26.01478 | 26.65949 | 26.01265 | 26.38772 | 26.72598 | 26.64581 | 27.80809 | 27.73892  | 27.81421 |
| 28.77077 | 28.53519 | 28.50522 | 28.37451 | 28.44332 | 28.54995 | 28.5389  | 28.81115  | 28.45513 |
| 26.92025 | 27.10149 | 26.9428  | 26.90885 | 26.98685 | 27.00838 | 26.49228 | 26.78955  | 26.69975 |
| 27.19835 | 27.3662  | 27.24445 | 27.42342 | 27.61807 | 27.53148 | 26.82639 | 26.83846  | 26.9428  |
| 27.05051 | 27.34942 | 27.34942 | 27.39917 | 27.47846 | 27.45513 | 28.06085 | 28.14589  | 28.05569 |
| 27.48616 | 27.5969  | 27.64581 | 27.22619 | 27.47846 | 27.27142 | 27.16039 | 27.5389   | 27.10149 |
| 28.5969  | 29.19835 | 28.87408 | 28.65267 | 28.48616 | 28.60045 | 27.65949 | 27.63893  | 27.90311 |
| 28.81726 | 29.06343 | 28.87994 | 28.82941 | 28.42342 | 28.63201 | 26.77706 | 26.9428   | 25.9428  |
| 30.09899 | 29.96774 | 30.08639 | 30.29789 | 30.35153 | 30.52028 | 29.66966 | 29.88867  | 29.55545 |
| 26.1488  | 25.82153 | 26.11347 | 26.34604 | 26.34266 | 26.38936 | 26.60399 | 26.50142  | 26.21512 |
| 30.35153 | 30.35153 | 30.40324 | 30.03486 | 30.03486 | 29.87848 | 30.7211  | 30.82335  | 30.61982 |
| 28.50142 | 28.68311 | 28.52028 | 28.20769 | 28.16039 | 28.02433 | 26.4346  | 26.20769  | 26.23169 |
| 26.03171 | 25.95394 | 25.83123 | 25.82639 | 26.14686 | 25.38443 | 27.05051 | 27.81421  | 27.37451 |
| 30.18423 | 30.11148 | 30.2535  | 30.42342 | 30.38278 | 30.52028 | 30.34096 | 30.21928  | 30.31959 |
| 28.15557 | 28.30226 | 28.05569 | 27.75175 | 27.56819 | 27.56819 | 28.15557 | 28.07623  | 28.18896 |
| 26.37782 | 26.86231 | 26.56092 | 27.55362 | 27.74535 | 27.61807 | 28.52028 | 28.4073   | 28.52776 |
| 27.15074 | 27.71293 | 27.32389 | 27.67976 | 27.63893 | 27.75812 | 28.391   | 28.40324  | 28.4512  |
| 29.91171 | 30.06085 | 29.83092 | 29.8549  | 29.99496 | 30.03486 | 28.66966 | 28.78332  | 28.68646 |
| 25.94056 | 26.06291 | 27.11148 | 26.85043 | 27.30661 | 28.06599 | 23.71816 | 23.88577  | 22.82104 |
| 27.1795  | 27.05051 | 27.0296  | 27.13124 | 26.64581 | 27.12139 | 26.35783 | 27.01903  | 26.16615 |
| 27.3662  | 27.75812 | 27.48616 | 27.60399 | 27.66628 | 27.5969  | 27.42342 | 27.70636  | 27.29789 |
| 27.66628 | 28.24898 | 27.76446 | 27.49381 | 27.33245 | 27.65949 | 27.76446 | 27.71947  | 27.65267 |
| 26.13712 | 26.27675 | 26.42982 | 26.13907 | 26.21697 | 26.14492 | 28.12139 | 28.07623  | 27.96499 |
| 26.33415 | 26.57109 | 26.18518 | 26.12928 | 26.35616 | 26.36119 | NaN      | NaN       | NaN      |
| 26.391   | 26.9428  | 26.09346 | 27.00838 | 26.98685 | 26.53297 | 24.98902 | 24.77455  | 25.86703 |
| 26.80193 | 26.96499 | 27.27142 | 26.76446 | 26.95394 | 26.68646 | 26.81421 | 26.63201  | 26.64581 |
| 26.18139 | 26.72598 | 27.08132 | 25.80931 | 26.32732 | 26.46451 | 24.8811  | 25.24264  | 24.90426 |
| 28.45905 | 28.54259 | 28.5389  | 28.43936 | 28.33245 | 28.41135 | 29.21234 | 29.06343  | 29.15557 |
| 26.72598 | 26.75175 | 26.71293 | 27.16039 | 27.05051 | 27.37451 | 26.56529 | 26.54038  | 26.83846 |
| 25.47692 | 26.09748 | 25.4073  | 26.49228 | 26.60399 | 27.0296  | 24.10149 | 26.502749 | 24.21697 |
| 27.66628 | 27.89735 | 27.70636 | 27.32389 | 27.32389 | 27.2803  | 27.00838 | 27.3662   | 26.90885 |
| 26.63201 | 27.0296  | 26.93157 | 26.92025 | 26.75175 | 26.77706 | 27.77706 | 28.43141  | 27.90885 |
| 27.12139 | 27.43141 | 27.15074 | 27.30661 | 27.45513 | 27.48616 | 27.95947 | 27.86821  | 28.00303 |
| 29.29351 | 28.85935 | 29.60752 | 28.84745 | 29.05827 | 29.27142 | 22.84613 | 23.42982  | 24.79452 |
| 30.45317 | 30.4919  | 30.55728 | 30.42342 | 30.4919  | 30.55728 | 30.36202 | 30.21928  | 30.31959 |
| 27.1795  | 27.52402 | 27.0296  | 26.87408 | 26.78955 | 26.99766 | 27.34942 | 27.31527  | 27.45513 |
| 29.91171 | 30.08639 | 29.91171 | 30.2535  | 30.27586 | 30.37244 | 29.89446 | 29.82941  | 29.92592 |
| 25.30661 | 26.03171 | 25.84086 | 25.56674 | 25.61526 | 26.1035  | 26.26785 | 26.75175  | 26.55947 |
| 27.22619 | 27.2535  | 26.90885 | 27.08132 | 27.16997 | 27.14102 | 27.18896 | 27.56092  | 27.16997 |
| 28.58978 | 28.85043 | 28.86821 | 28.96499 | 28.82639 | 28.95947 | 29.37451 | 29.33671  | 29.28912 |
| NaN      | NaN      | NaN      | NaN      | NaN      | 24.28912 | 29.5969  | 28.60752  | 29.56275 |
| 30.17236 | 30.16039 | 30.23078 | 30.61105 | 30.52962 | 30.76129 | 30.28692 | 30.06085  | 30.17236 |
| 29.13614 | 29.23763 | 29.27808 | 28.66289 | 28.51653 | 28.86526 | 26.27853 | 26.32732  | 25.85519 |
| 27.21697 | 27.23535 | 27.31527 | 27.19835 | 27.23535 | 27.1795  | NaN      | NaN       | NaN      |
| 29.64238 | 29.80193 | 29.68646 | 29.41135 | 29.31095 | 29.33458 | 27.84446 | 27.98142  | 27.94838 |
| 29.81574 | 29.70471 | 29.78176 | 30.06085 | 29.95394 | 30.21928 | 29.7692  | 29.73731  | 29.75653 |
| 29.92592 | 29.77863 | 29.83092 | 29.96774 | 30.06085 | 30.13614 | 30.14831 | 30.08639  | 30.14831 |
| 28.58262 | 28.62854 | 28.58262 | 28.41941 | 28.4746  | 28.4073  | 29.14831 | 29.02433  | 29.22849 |
| 25.77706 | 26.16231 | 25.70504 | 26.09949 | 26.36453 | 26.2021  | 25.9428  | 25.86703  | 26.02538 |
| 26.63201 | 27.15074 | 26.81421 | 26.87408 | 26.83846 | 26.58978 | 27.2803  | 27.39917  | 27.18896 |
| 27.43141 | 24.6971  | 27.53148 | 23.62087 | 25.56964 | 27.75812 | 26.05258 | 26.73892  | 25.95394 |
| 26.89735 | 26.71293 | 26.73892 | 26.55069 | 26.4186  | 26.28383 | 27.509   | 27.00838  | 27.16039 |
| 27.07112 | 27.0296  | 27.28912 | 27.06085 | 27.2803  | 27.20769 | 27.09144 | 27.24445  | 27.08132 |
| 30.19601 | 30.33031 | 30.36202 | 31.00169 | 31.0544  | 31.0927  | 30.4919  | 30.47267  | 30.51089 |
| 26.58978 | 26.38113 | 26.65949 | 26.85043 | 26.75175 | 27.07112 | 27.07112 | 26.99766  | 26.96499 |
| 27.51653 | 26.73892 | 27.16039 | 27.61105 | 28.14102 | 26.90885 | 26.82639 | 26.54038  | 26.24989 |
| 28.28472 | 28.2535  | 28.32817 | 28.39917 | 28.13124 | 28.258   | 28.07623 | 27.95947  | 27.90885 |
| 29.88577 | 29.98142 | 30.09899 | 30.03486 | 30.19601 | 29.94    | 30.7211  | 30.7692   | 30.73731 |
| 29.61281 | 29.4746  | 29.64924 | 29.70965 | 29.76604 | 29.75175 | 29.6774  | 30.02168  | 29.95394 |
| 25.28912 | 26.04635 | 26.09346 | 26.2553  | 25.94726 | 26.29964 | 26.9428  | 26.77706  | 27.06085 |
| 26.22803 | 25.77706 | 25.7543  | 25.72338 | 25.14492 | 24.98902 | 25.94949 | 26.22435  | 26.1488  |
| 28.79576 | 28.58262 | 28.71293 | 28.61807 | 29.00838 | 28.97323 | 26.9428  | 27.00838  | 27.04009 |
| 27.19835 | 26.96499 | 27.16997 | 27.24445 | 27.47073 | 27.57542 | 27.509   | 27.52402  | 27.29789 |
| 28.29351 | 28.42742 | 28.35783 | 28.70636 | 28.67976 | 28.61456 | 28.31095 | 28.31527  | 28.26696 |
| 27.12139 | 27.09144 | 26.96499 | 27.09144 | 27.05051 | 26.89735 | 26.89735 | 27.38278  | 27.27142 |
| 29.75334 | 29.80655 | 29.95394 | 29.76446 | 29.61632 | 29.66458 | 28.74214 | 29.13369  | 28.78019 |
| 29.11644 | 29.35363 | 29.29132 | 29.71947 | 29.75812 | 29.80347 | 29.59335 | 29.53334  | 29.31959 |
| 25.51051 | 24.02749 | 25.87877 | 25.73376 | 26.09346 | 25.92025 | 26.55215 | 26.86231  | 26.93157 |
| 21.40145 | 21.3538  | 21.25926 | 21.29894 | 20.9812  | 23.25061 | 28.42342 | 28.4073   | 28.35783 |
| 25.94056 | 25.97596 | 26.16039 | 25.88809 | 25.73376 | 25.80931 | 26.00838 | 25.32732  | 25.71293 |
| 28.18423 | 28.42742 | 28.31959 | 27.99226 | 28.2803  | 28.12139 | 28.14589 | 28.22619  | 28.26696 |
| 27.47846 | 27.83846 | 27.30661 | 27.63201 | 27.77077 | 27.81421 | 26.82639 | 26.86231  | 26.11148 |
| 26.23535 | 26.46762 | 26.30138 | 26.80193 | 26.76446 | 26.57542 | 26.51953 | 26.19835  | 25.69975 |
| 28.37036 | 28.70306 | 28.43539 | 28.42742 | 28.48232 | 28.55362 | 27.28912 | 27.16997  | 26.80193 |
| 26.92025 | 26.82639 | 27.04009 | 27.29789 | 27.42342 | 27.35783 | 27.70636 | 27.61105  | 27.75175 |
| 28.31095 | 28.34096 | 28.11148 | 28.76129 | 29.00303 | 28.87408 | 28.23078 | 28.35783  | 27.90311 |
| 23.29614 | 22.26499 | 24.47383 | 25.50749 | 25.26069 | 25.62645 | 26.83846 | 26.72598  | 26.75175 |
| 27.67303 | 27.98685 | 27.89735 | 27.50142 | 27.30661 | 27.3662  | 27.16039 | 27.12139  | 27.11148 |
| 28.01372 | 28.18423 | 27.86231 | 28.28912 | 28.16997 | 28.19835 | 27.77706 | 27.47846  | 27.49381 |
| 27.34942 | 27.45513 | 27.15074 | 27.2535  | 27.3662  | 27.34942 | 27.89157 | 27.93157  | 27.99766 |
| 29.08385 | 29.2535  | 29.22159 | 29.04791 | 29.02697 | 28.91741 | 29.07877 | 28.89735  | 29.20536 |
| 29.29351 | 29.34096 | 29.2535  | 29.61807 | 29.55728 | 29.53148 | 28.83545 | 28.66628  | 28.98685 |
| 29.24672 | 29.33671 | 29.4174  | 29.14831 | 29.24898 | 29.24672 | 29.62157 | 29.52776  | 29.509   |
| 28.51277 | 28.2535  | 28.41538 | 28.23078 | 28.39917 | 28.41538 | 28.4746  | 28.71293  | 28.57542 |
| 28.32389 | 28.57181 | 28.47073 | 28.81421 | 28.509   | 28.56819 | 29.30661 | 29.20536  | 29.30661 |
| 26.89735 | 26.76446 | 26.87408 | 26.88577 | 26.88577 | 26.85043 | 26.99766 | 26.67303  | 26.88577 |
| 28.05051 | 28.12139 | 28.08639 | 27.82639 | 27.97049 | 27.99226 | 28.44727 | 28.41538  | 28.43936 |
| 27.91456 | 27.78332 | 27.76446 | 27.43141 | 27.39917 | 27.29789 | 27.63201 | 27.37451  | 27.63201 |

|          |          |          |          |          |          |          |          |          |
|----------|----------|----------|----------|----------|----------|----------|----------|----------|
| 29.70306 | 29.85638 | 29.5862  | 28.52402 | 28.68311 | 28.60752 | 28.55362 | 28.5969  | 28.5389  |
| 26.58978 | 26.26785 | 26.33586 | 26.56092 | 26.65949 | 26.57542 | 24.45513 | 24.59833 | NaN      |
| 27.28912 | 27.39917 | 27.29789 | 27.23535 | 27.21697 | 27.16039 | 27.0296  | 27.05051 | 27.21697 |
| 26.4186  | 26.77706 | 26.317   | 26.239   | 26.16231 | 26.25169 | 27.00838 | 27.05051 | 26.67303 |
| 25.59263 | 25.98251 | 25.66763 | 25.81176 | 25.65403 | 25.84805 | 26.29964 | 26.1757  | 26.16039 |
| 27.19835 | 27.20769 | 27.50142 | 26.82639 | 27.08132 | 27.01903 | 25.54628 | 25.73892 | 24.55801 |
| 26.64581 | 26.86231 | 26.51352 | 26.34266 | 26.80193 | 26.49838 | 27.73247 | 28.31527 | 27.41538 |
| 28.94838 | 29.17712 | 28.97869 | 28.82031 | 28.77706 | 28.89157 | 29.02697 | 28.87408 | 29.01105 |
| NaN      | 25.01903 | 24.93157 | 24.35111 | 25.28207 | 24.59263 | 25.12139 | 26.50294 | 25.87408 |
| 26.75175 | 25.67842 | 26.9428  | 27.07112 | 26.55801 | 26.61807 | 27.509   | 27.16039 | 26.01903 |
| 28.87701 | 29.05051 | 28.94838 | 28.31527 | 28.23535 | 28.29351 | 28.67976 | 28.57903 | 28.65608 |
| 27.09144 | 27.19835 | 26.93157 | 27.12139 | 27.23535 | 27.1795  | 29.04791 | 29.09648 | 29.25575 |
| 27.2803  | 27.35783 | 27.39917 | 28.11148 | 28.07623 | 28.11644 | 28.35783 | 28.16039 | 28.2535  |
| 28.10649 | 28.24898 | 28.14102 | 28.05569 | 27.99766 | 28.01903 | 27.08132 | 27.00838 | 27.15074 |
| 26.89735 | 27.10149 | 26.61807 | 27.35783 | 27.5389  | 27.31527 | 26.44884 | 26.61807 | 26.67303 |
| 29.69975 | 29.53334 | 29.89735 | 29.48039 | 29.35153 | 29.46879 | 29.34942 | 29.2803  | 29.2007  |
| 29.68979 | 29.68144 | 29.87262 | 30.14831 | 30.19601 | 30.2535  | 29.71784 | 29.6268  | 29.98142 |
| NaN      | NaN      | NaN      | NaN      | NaN      | NaN      | 29.16758 | 28.95394 | 29.16997 |
| 29.08132 | 29.44134 | 29.71947 | 28.89735 | 29.01903 | 28.82639 | 27.33245 | 27.3662  | 27.29789 |
| 28.00303 | 28.12633 | 28.02433 | 28.95947 | 28.92592 | 29.11148 | 29.11148 | 28.4073  | 28.24898 |
| 28.22159 | 28.61807 | 28.391   | 28.28912 | 28.21234 | 28.05051 | 28.84446 | 28.87994 | 28.75494 |
| 28.53519 | 28.68979 | 28.60399 | 28.4073  | 28.60045 | 28.35783 | 28.82031 | 28.52776 | 28.65608 |
| 26.48462 | 26.71293 | 26.58978 | 26.35279 | 26.15267 | 26.29088 | 25.30313 | 25.26428 | 24.78457 |
| 27.89735 | 27.85638 | 27.84446 | 27.94838 | 27.71947 | 27.82639 | 27.39917 | 27.34942 | 27.42342 |
| 28.95394 | 28.99766 | 28.67976 | 28.86231 | 28.5389  | 28.75175 | 25.31008 | 25.60682 | 25.65676 |
| 29.87408 | 29.8814  | 29.8814  | 29.65438 | 29.64238 | 29.57181 | NaN      | NaN      | 21.32663 |
| 29.22389 | 29.08639 | 29.18423 | 29.29132 | 29.21697 | 29.26919 | 29.2803  | 29.33884 | 28.96224 |
| 27.12139 | 26.99766 | 26.83846 | 26.69975 | 26.56529 | 26.83846 | 27.38278 | 27.47073 | 27.65267 |
| 26.85043 | 26.57109 | 26.93157 | 27.34096 | 27.61807 | 27.53148 | 27.32389 | 27.31527 | 27.16039 |
| 26.61807 | 27.06085 | 26.58978 | 27.00838 | 26.90885 | 26.81421 | 27.37451 | 27.29789 | 27.16039 |
| 27.07112 | 27.19835 | 26.98685 | 26.72598 | 27.23535 | 26.82639 | 26.23535 | 26.71293 | 26.57254 |
| 30.45317 | 30.45317 | 30.36202 | 29.78332 | 29.73409 | 29.79266 | NaN      | NaN      | NaN      |
| 27.61807 | 27.80809 | 27.63893 | 27.28912 | 27.23535 | 27.2803  | 26.90885 | 27.32389 | 26.93157 |
| 30.58441 | 30.58441 | 30.60222 | 30.4919  | 30.38278 | 30.4919  | 30.52962 | 30.35153 | 30.61105 |
| 27.48616 | 27.27142 | 27.04009 | 26.92025 | 26.68646 | 26.60399 | 27.13124 | 27.71293 | 27.66628 |
| 30.42342 | 30.42342 | 30.47267 | 30.73731 | 30.7692  | 30.79266 | 30.64581 | 30.27586 | 30.42342 |
| 28.77392 | 29.00035 | 28.98414 | 29.33671 | 29.26696 | 29.4073  | 29.62331 | 29.39917 | 29.61281 |
| 31.55728 | 31.57091 | 31.38278 | 31.37244 | 31.44332 | 31.50616 | 30.29789 | 30.28692 | 30.20769 |
| 30.00838 | 29.39917 | 30.12386 | 30.28692 | 30.12386 | 30.34096 | 29.99496 | 30.08639 | 30.02168 |
| 26.1035  | 24.54628 | 26.1035  | 26.1946  | 26.27853 | 25.87643 | 27.33245 | 27.47846 | 27.26249 |
| 27.96499 | 28.2803  | 27.24445 | 27.61807 | 27.45513 | 27.29789 | 28.33671 | 28.66628 | 28.43539 |
| 29.48616 | 29.31959 | 29.41538 | 29.461   | 29.4512  | 29.64753 | 30.28692 | 30.36202 | 30.12386 |
| 28.01903 | 28.13614 | 28.05051 | 27.86821 | 27.87408 | 27.78955 | 28.16997 | 27.9428  | 28.20769 |
| 27.58978 | 27.91456 | 27.84446 | 27.67976 | 27.89735 | 27.32389 | 28.14102 | 28.19366 | 28.45513 |
| NaN      | NaN      | NaN      | NaN      | 24.81421 | NaN      | 27.509   | 26.67303 | 26.77706 |
| 26.9428  | 26.81421 | 26.90885 | 26.22803 | 26.28207 | 26.01903 | 24.10949 | 23.62087 | 24.33074 |
| 29.81268 | 29.98142 | 29.87994 | 29.46295 | 29.50142 | 29.6981  | 29.37036 | 29.32174 | 29.27808 |
| 28.20769 | 28.258   | 28.12139 | 27.80193 | 27.68646 | 27.80809 | 26.61807 | 26.65949 | 26.56384 |
| 27.34942 | 26.98685 | 27.5389  | 26.317   | 27.26249 | 26.57109 | NaN      | 25.01052 | 23.19761 |
| 28.54259 | 28.42742 | 28.62157 | 28.06085 | 28.04009 | 27.90885 | 26.65949 | 26.85043 | 26.54481 |
| 25.89504 | 25.85519 | 26.21512 | 26.52701 | 26.54922 | 26.69975 | 25.84086 | 25.56674 | 25.77706 |
| 27.06085 | 26.26428 | 26.92025 | 26.9428  | 26.89735 | 26.98685 | 27.73247 | 28.13124 | 27.73247 |
| 27.07112 | 27.57542 | 26.9428  | 26.78955 | 26.52103 | 26.88577 | 26.48769 | 26.54185 | 26.42822 |
| 30.19601 | 30.26472 | 30.11148 | 29.83996 | 29.80655 | 29.84446 | 31.08639 | 30.83092 | 31.0414  |
| 27.14102 | 27.39917 | 27.11148 | 27.74535 | 27.83846 | 27.90311 | 28.35783 | 28.26696 | 28.28472 |
| 27.89735 | 28.28472 | 28.10149 | 27.80809 | 27.9428  | 27.71293 | 27.07112 | 26.44727 | 26.69975 |
| 25.36453 | 25.17188 | 26.08132 | 26.44095 | 26.1332  | 26.03171 | 26.86231 | 26.46139 | 26.60399 |
| 26.61807 | 26.57542 | 26.60399 | 26.69975 | 26.76446 | 26.55362 | 26.53148 | 26.51051 | 26.24082 |
| 27.51653 | 27.29789 | 26.68646 | 26.00196 | 26.97596 | 27.39917 | 26.89735 | 26.52103 | 26.46139 |
| 26.67303 | 27.00838 | 26.88577 | 26.52701 | 26.83846 | 26.65949 | 26.50749 | 26.52253 | 26.31872 |
| 27.80193 | 27.76446 | 27.82031 | 28.07623 | 27.93719 | 27.93719 | 28.1795  | 28.1795  | 28.391   |
| 27.81421 | 27.9428  | 27.87994 | 27.47846 | 27.45513 | 27.29789 | 27.29789 | 27.92025 | 27.38278 |
| 26.68646 | 26.99766 | 26.48769 | 26.27142 | 26.14297 | 26.26607 | 26.30835 | 26.2553  | 26.31008 |
| 28.20303 | 27.32389 | 28.06599 | 27.38278 | 27.15074 | 27.74535 | 25.89735 | 25.74663 | 25.90656 |
| 27.82031 | 27.98142 | 27.80193 | 27.87408 | 27.81421 | 27.83244 | 27.85043 | 28.00838 | 27.71947 |
| 27.41538 | 28.08639 | 27.43141 | 27.0296  | 27.07112 | 26.67303 | 27.0296  | 27.41538 | 27.0296  |
| 28.89735 | 28.98956 | 28.95671 | 28.96774 | 29.08132 | 29.18896 | 28.15074 | 28.09648 | 28.24898 |
| 28.16997 | 28.2803  | 28.11644 | 28.2803  | 27.9428  | 28.09648 | 26.73892 | 26.38607 | 26.71293 |
| 27.50142 | 27.83846 | 27.57542 | 27.61807 | 27.4073  | 27.56092 | 27.11148 | 26.83846 | 26.87408 |
| 26.33245 | 26.05672 | 25.60682 | 26.39917 | 27.1795  | 26.77706 | 25.16423 | 25.09748 | 25.04427 |
| NaN      | NaN      | 24.84805 | 24.15653 | NaN      | 24.48001 | 25.16806 | 25.63755 | 25.34096 |
| 27.26249 | 27.15074 | 26.85043 | 27.69975 | 27.60399 | 27.51653 | 26.93157 | 27.15074 | 26.96499 |
| 33.65224 | 33.40831 | 33.7751  | 33.33031 | 33.35678 | 33.43341 | 33.64151 | 33.86083 | 33.81383 |
| 27.5969  | 27.53148 | 27.68646 | 28.14589 | 28.15074 | 28.20769 | 28.06085 | 27.80193 | 27.66628 |
| 31.90813 | 31.9574  | 31.99496 | 31.88285 | 31.91883 | 31.92592 | 32.27586 | 32.44332 | 32.19308 |
| 26.26964 | 26.17379 | 25.96058 | 26.07112 | 25.97158 | 26.26249 | 27.20769 | 26.95394 | 27.23535 |
| 25.70767 | 25.61807 | 25.32389 | 25.1795  | 25.48616 | 25.45199 | 25.03591 | 25.07316 | 24.08537 |
| 22.90242 | NaN      | 24.33074 | NaN      | NaN      | 23.391   | 24.44253 | 24.74919 | 24.56384 |
| 26.07928 | 26.61807 | 26.14686 | 27.20769 | 26.89735 | 26.63201 | 25.2021  | 24.01052 | 25.20583 |
| 26.317   | 26.61807 | 26.29964 | 26.43141 | 26.46451 | 26.64581 | 25.89735 | 26.03381 | 25.77957 |
| 26.21327 | 26.22803 | 26.15074 | 25.56384 | 26.05051 | 25.49534 | 26.4186  | 26.24082 | 26.07725 |
| 27.39917 | 27.58262 | 27.41538 | 27.1795  | 27.509   | 27.3662  | 26.80193 | 26.31008 | 26.64581 |
| 27.58262 | 27.86821 | 27.77077 | 27.09144 | 27.27142 | 27.15074 | 27.91456 | 27.90311 | 27.89735 |
| 24.59263 | 24.64306 | 24.84326 | 26.76446 | 26.1946  | 25.90656 | 25.83605 | 25.83123 | 25.93832 |
| 25.9955  | 26.07928 | 26.2021  | 24.33074 | 24.30313 | 23.51653 | 26.67303 | 26.2856  | 26.19648 |
| NaN      | 25.317   | 22.75735 | 25.89966 | 25.54333 | 25.66221 | 25.33415 | 26.09346 | 25.52253 |
| 26.17379 | 25.56092 | 25.74663 | 25.82639 | 25.76192 | 25.72078 | 26.83846 | 26.47383 | 26.52103 |
| 28.94    | 28.37451 | 29.0296  | 28.03486 | 27.51653 | 28.14102 | 24.08537 | 22.89874 | 21.83461 |

|          |          |          |          |          |          |          |          |          |
|----------|----------|----------|----------|----------|----------|----------|----------|----------|
| 26.69975 | 27.07112 | 26.77706 | 27.07112 | 27.00838 | 27.10149 | 27.85638 | 27.65949 | 27.83244 |
| 28.55362 | 29.00303 | 28.86231 | 28.70636 | 28.74855 | 28.81421 | 28.65949 | 28.66289 | 28.53148 |
| 24.15653 | 23.63201 | 23.91342 | 25.05258 | 25.22803 | 23.94056 | 26.00624 | 27.16997 | 26.64581 |
| 25.99335 | 25.15653 | 26.29789 | 25.11347 | 24.60399 | 24.7543  | 26.54922 | 26.97596 | 27.01903 |
| 25.87173 | 25.04843 | 26.1795  | 26.2553  | 25.47073 | 25.54922 | 25.29614 | 25.73117 | 25.4073  |
| 29.67135 | 30.18423 | 29.72598 | 29.62506 | 29.62157 | 29.60399 | 29.43141 | 29.61105 | 29.68646 |
| 28.37036 | 28.45905 | 28.3452  | 28.31959 | 28.37036 | 28.44332 | NaN      | NaN      | NaN      |
| 27.4073  | 27.05051 | 27.16039 | 27.16997 | 27.13124 | 27.44727 | 25.73892 | 25.57254 | 25.81421 |
| 22.37518 | 22.95482 | 24.21697 | 24.01052 | 23.42982 | 27.83846 | 27.85043 | 27.47073 | 28.05569 |
| 28.391   | 28.6764  | 28.44332 | 28.61105 | 28.67303 | 28.55362 | 28.37036 | 28.46295 | 28.35783 |
| 26.83846 | 27.21697 | 26.97596 | 26.60399 | 26.5285  | 26.60399 | 26.28912 | 26.28912 | 26.29789 |
| 26.60399 | 26.33586 | 26.02538 | 26.85043 | 26.85043 | 26.87408 | 26.16039 | 26.04218 | 25.73376 |
| 27.32389 | 27.1795  | 27.26249 | 27.05051 | 26.85043 | 26.83846 | 27.15074 | 27.00838 | 26.73892 |
| 27.11148 | 26.56092 | 27.13124 | 26.86231 | 27.00838 | 26.89735 | 27.90885 | 27.93157 | 27.86231 |
| 27.12139 | 26.55215 | 27.72598 | 26.86231 | 26.89735 | 26.92025 | NaN      | 23.32389 | NaN      |
| NaN      | NaN      | 21.04926 | NaN      | NaN      | NaN      | 27.47073 | 28.61105 | 28.80809 |
| 32.73933 | 32.52729 | 32.81765 | 31.86083 | 32.0414  | 32.03813 | 30.86083 | 30.86821 | 30.89735 |
| 31.81192 | 31.68813 | 31.98142 | 31.73731 | 31.81192 | 31.64151 | 31.25912 | 31.17236 | 31.17236 |
| 27.19835 | 27.18896 | 26.82639 | 26.77706 | 26.60399 | 26.57542 | 26.02327 | 25.8044  | 26.18707 |
| 29.64753 | 29.66119 | 29.73085 | 29.58082 | 29.52402 | 29.29351 | 28.55728 | 28.49381 | 28.65267 |
| 27.2803  | 27.20769 | 27.24445 | 27.49381 | 27.19835 | 27.18896 | 25.49228 | 25.45199 | 25.59833 |
| 26.23352 | 25.9157  | 26.43778 | 26.72598 | 26.61807 | 26.69975 | 26.96499 | 26.82639 | 26.93157 |
| 26.95394 | 27.10149 | 27.07112 | 26.58978 | 26.64581 | 26.83846 | 26.98685 | 26.65949 | 26.75175 |
| 29.62157 | 29.92592 | 29.68311 | 29.7911  | 29.78332 | 29.66458 | 30.27586 | 30.06085 | 30.03486 |
| 30.51089 | 30.71293 | 30.59335 | 29.58441 | 29.54995 | 29.49572 | 28.7162  | 28.78644 | 28.65949 |
| 21.43237 | 24.79452 | 24.63201 | 23.12218 | 24.65949 | 23.36453 | 28.51653 | 27.92592 | 28.12633 |
| 26.86231 | 27.19835 | 26.88577 | 26.63201 | 26.64581 | 26.65949 | 26.98685 | 27.21697 | 27.09144 |
| 27.5389  | 27.86231 | 27.56819 | 27.46295 | 27.35783 | 27.28912 | 26.23169 | 26.61807 | 26.24445 |
| 28.52776 | 28.75494 | 28.40324 | 29.22849 | 29.23991 | 29.34308 | 29.60222 | 29.44727 | 29.7211  |
| 27.2535  | 27.29789 | 26.86231 | 27.44727 | 27.56819 | 27.84446 | 28.20303 | 28.1795  | 28.12633 |
| 28.87701 | 28.84146 | 28.92592 | 28.88577 | 28.57903 | 28.79266 | 28.22159 | 28.24898 | 28.1795  |
| 29.15557 | 29.3662  | 29.22619 | 29.4453  | 29.50142 | 29.43141 | 29.87408 | 29.82335 | 29.89157 |
| 27.83846 | 27.76446 | 27.49381 | 27.66628 | 27.50142 | 27.75175 | 27.65949 | 27.62506 | 27.90885 |
| 29.15316 | 29.14102 | 29.18896 | 29.02168 | 28.97869 | 28.98685 | 29.14102 | 29.18896 | 29.10649 |
| 27.76446 | 27.99226 | 27.73247 | 27.34096 | 27.34096 | 27.13124 | 28.01903 | 27.68646 | 27.73892 |
| 29.67135 | 29.87555 | 29.65096 | 29.99496 | 29.87262 | 30.04791 | 29.77235 | 29.6981  | 29.64238 |
| 29.80501 | 29.73409 | 29.94    | 30.17236 | 30.41337 | 30.37244 | 29.73409 | 29.66458 | 29.61632 |
| 27.9428  | 28.10149 | 27.98142 | 27.69312 | 27.73247 | 27.82639 | 28.09144 | 28.08132 | 28.14102 |
| 28.16519 | 28.42342 | 28.48999 | 28.21234 | 28.09648 | 28.1795  | 27.29789 | 27.43936 | 27.22619 |
| 27.43141 | 27.48616 | 27.16039 | 27.06085 | 26.95394 | 27.20769 | 26.77706 | 26.63201 | 27.06085 |
| 29.32603 | 29.3662  | 29.31095 | 29.06343 | 29.17236 | 28.99226 | 28.65608 | 28.83244 | 28.68646 |
| 25.82881 | 26.02327 | 25.69445 | 25.88577 | 25.83846 | 25.46139 | 26.08537 | 26.77706 | 25.98033 |
| 25.22435 | 25.84326 | 25.21327 | 25.21327 | 24.39754 | 24.14102 | 24.49838 | 24.60399 | 25.33415 |
| 26.97596 | 26.73892 | 27.00838 | 26.73892 | 26.57398 | 26.98685 | 27.22619 | 27.08132 | 27.15074 |
| 27.44727 | 27.55362 | 27.87994 | 27.56819 | 27.72598 | 27.89735 | 25.73635 | 25.29614 | 25.44253 |
| 30.89735 | 30.93298 | 30.72923 | 30.57542 | 30.55728 | 30.61982 | 29.50711 | 29.43141 | 29.64753 |
| 24.81909 | 25.21327 | 25.06085 | 24.84326 | 24.65403 | 24.95394 | 26.43936 | 26.88577 | 26.3662  |
| 27.12139 | 27.31527 | 27.0296  | 27.05051 | 26.96499 | 26.97596 | 26.68646 | 26.49076 | 26.99766 |
| 26.44411 | 26.69975 | 26.85043 | 26.95394 | 27.18896 | 27.19835 | 26.47846 | 26.08132 | 25.15267 |
| 27.11148 | 27.20769 | 26.88577 | 26.93157 | 26.80193 | 26.71293 | 27.41538 | 27.2803  | 27.30661 |
| 25.11744 | 25.2571  | 25.11744 | 25.46139 | 25.22066 | 25.32732 | 27.52402 | 27.391   | 27.39917 |
| 28.34942 | 28.5389  | 28.68311 | 28.54259 | 28.69312 | 28.68646 | 28.31959 | 28.50522 | 28.31095 |
| 26.06702 | 26.30835 | 26.35951 | 26.05879 | 26.35783 | 26.08942 | 26.98685 | 26.61807 | 27.04009 |
| 27.90885 | 28.12139 | 27.97596 | 27.38278 | 27.47846 | 27.51653 | 27.44727 | 27.58262 | 27.2535  |
| 27.78332 | 28.15074 | 27.75812 | 27.83846 | 27.73247 | 27.85043 | NaN      | NaN      | NaN      |
| 26.37948 | 26.2803  | 26.04009 | 26.36786 | 26.98685 | 26.72598 | 25.33415 | 25.82639 | 25.52552 |
| 26.12731 | 26.09144 | 25.92931 | 26.42662 | 25.99766 | 26.2535  | 27.28912 | 27.16997 | 27.00838 |
| 26.40892 | 26.30835 | 26.05879 | 26.29263 | 25.93382 | 26.34096 | 25.92931 | 26.19084 | 25.73892 |
| 29.54075 | 29.78799 | 29.51465 | 29.06343 | 28.75175 | 28.75494 | 27.98142 | 27.88577 | 27.74535 |
| NaN      | NaN      | NaN      | NaN      | NaN      | NaN      | 25.75175 | 26.24989 | 26.38443 |
| 27.4073  | 27.61807 | 27.15074 | 27.32389 | 27.38278 | 27.33245 | 27.57542 | 27.49381 | 27.60399 |
| 27.22619 | NaN      | 27.08132 | 26.41054 | 26.87408 | 25.84805 | 27.60399 | 27.47073 | 28.2803  |
| 27.72598 | 27.71947 | 27.5969  | 27.01903 | 27.06085 | 26.93157 | 25.75175 | 25.11744 | 25.38113 |
| 29.3662  | 29.61632 | 29.391   | 30.03486 | 29.95394 | 30.02168 | 29.43141 | 29.3869  | 29.6981  |
| 27.29789 | 27.2803  | 27.44727 | 27.76446 | 27.73892 | 27.80809 | 27.74535 | 27.68646 | 28.05569 |
| 27.2535  | 27.62506 | 27.27142 | 26.56674 | 26.54628 | 26.71293 | 24.75939 | 24.99766 | 24.28207 |
| 28.00303 | 27.30661 | 27.87994 | 28.53148 | 28.29351 | 27.69312 | NaN      | 22.2006  | NaN      |
| 26.92025 | 27.08132 | 27.04009 | 27.24445 | 27.13124 | 27.44727 | 27.63893 | 27.66628 | 27.45513 |
| 25.32045 | 26.96499 | 26.14492 | 25.99766 | 26.33415 | 26.16039 | 27.30661 | 26.97596 | 27.35783 |
| 23.2535  | 24.91798 | 22.38574 | 23.94056 | 25.65403 | NaN      | 26.33245 | 26.92025 | 26.71293 |
| 27.63201 | 27.69975 | 27.48616 | 27.82639 | 27.57542 | 27.50142 | 27.42342 | 27.4073  | 27.54628 |
| 26.95394 | 26.75175 | 26.78955 | 26.50749 | 26.32732 | 26.29789 | 23.76951 | 23.59833 | 23.64306 |
| 26.28383 | 25.71816 | 25.56384 | 25.65676 | 25.38443 | 25.65949 | 26.52999 | 26.41538 | 26.4073  |
| 27.41538 | 27.38278 | 27.18896 | 28.11644 | 28.06599 | 28.07623 | 27.35783 | 27.35783 | 27.23535 |
| 27.23535 | 27.49381 | 27.06085 | 26.95394 | 26.71293 | 26.80193 | 27.56092 | 27.20769 | 27.2803  |
| 27.66628 | 28.3869  | 27.99226 | 27.69312 | 27.24445 | 27.77706 | 28.32389 | 28.64238 | 28.19366 |
| 25.32732 | 25.73117 | 25.24627 | 25.86231 | 25.53742 | 25.54922 | 25.77706 | 25.7415  | 25.45826 |
| 29.66797 | 29.46879 | 29.68646 | 29.94    | 30.12386 | 30.06085 | 29.70141 | 29.6372  | 29.63201 |
| 27.53148 | 27.58978 | 27.53148 | 27.99226 | 28.04009 | 28.42342 | 28.33671 | 28.38278 | 28.47846 |
| 26.15267 | 25.86231 | 25.7024  | 26.10949 | 25.92025 | 25.68913 | 26.57542 | 26.48155 | 26.55801 |
| 26.09346 | 26.1776  | 25.85043 | 26.52701 | 26.67303 | 26.76446 | 26.99766 | 27.0296  | 26.92025 |
| 27.509   | 27.53148 | 27.63201 | 25.7543  | 25.37782 | 26.2021  | 23.09668 | 21.6584  | 21.75532 |
| 28.46295 | 28.258   | 28.49381 | 29.11644 | 29.08132 | 29.258   | 29.31527 | 29.28912 | 29.16279 |
| 25.6811  | 25.89735 | 25.87408 | 25.38443 | 25.83605 | 25.83605 | 26.60399 | 26.90885 | 26.58978 |
| 25.65949 | 25.42662 | 24.98033 | 25.71555 | 26.11148 | 26.11148 | 25.63201 | 25.92479 | 26.15074 |
| 26.16423 | 26.19084 | 25.98468 | 26.2553  | 26.17379 | 26.34942 | 26.67303 | 26.53742 | 26.83846 |
| 32.59779 | 32.29789 | 32.49429 | 32.28967 | 30.82335 | 32.06407 | 32.25068 | 32.63287 | 31.81955 |
| 28.56092 | 28.3869  | 28.55362 | 28.33245 | 28.45513 | 28.48999 | 27.27142 | 27.16039 | 27.14102 |

|          |          |          |          |          |          |          |          |          |
|----------|----------|----------|----------|----------|----------|----------|----------|----------|
| 29.26472 | 29.49953 | 29.42542 | 29.26472 | 29.32174 | 29.22849 | 28.27142 | 28.35363 | 28.17474 |
| 24.35783 | 23.60964 | 24.84805 | 24.60964 | NaN      | 23.59833 | 27.35783 | 26.57398 | 27.53148 |
| 28.32817 | 28.09144 | 28.29789 | 28.39509 | 28.15074 | 28.70965 | 28.23991 | 28.07112 | 27.85638 |
| 27.77077 | 27.15074 | 27.9428  | 26.50749 | 26.90885 | 27.16997 | 24.27498 | 24.72858 | 25.53445 |
| 28.5969  | 28.41941 | 28.66628 | 28.36202 | 28.41941 | 28.28912 | 28.63893 | 28.4746  | 28.57903 |
| 29.78019 | 29.82941 | 29.83244 | 29.80193 | 29.83394 | 29.92592 | 29.7162  | 29.95394 | 29.89446 |
| 29.89157 | 30.38278 | 30.24218 | 30.19601 | 30.03486 | 30.09899 | 28.63547 | 28.66628 | 28.82941 |
| 26.04427 | 25.55801 | 25.36786 | 26.56238 | 26.49076 | 26.44884 | 26.82639 | 27.15074 | 26.40568 |
| 35.16414 | 35.14148 | 35.08718 | 34.05924 | 34.09899 | 34.15285 | 33.21928 | 33.30334 | 33.24785 |
| 25.72078 | 25.88577 | 25.9428  | 25.96719 | 25.28207 | 25.62645 | 25.64031 | 25.50446 | 25.65676 |
| 27.50142 | 27.80809 | 27.56819 | 28.13124 | 28.24445 | 26.93157 | 25.38443 | 25.81421 | 25.49838 |
| 24.73376 | 25.56384 | 25.09748 | 25.89041 | 25.90656 | 25.71293 | 25.93382 | 25.30661 | 25.71816 |
| 28.95116 | 29.04791 | 28.99496 | 29.19131 | 29.21002 | 29.33458 | 29.37865 | 29.56092 | 29.39305 |
| 26.81421 | 26.97596 | 26.61807 | 26.75175 | 26.97596 | 27.05051 | 27.38278 | 27.58978 | 27.37451 |
| 26.77706 | 26.80193 | 26.49381 | 27.16997 | 26.64581 | 26.86231 | 26.4186  | 26.18518 | 26.23169 |
| 26.63201 | 26.85043 | 26.38278 | 26.26785 | 26.45199 | 26.75175 | 25.92931 | 26.13124 | 25.22803 |
| 27.14102 | 26.78955 | 27.2535  | 27.2535  | 27.1795  | 27.3662  | 26.68646 | 26.96499 | 26.67303 |
| 26.49534 | 26.93157 | 26.71293 | 26.63201 | 26.50597 | 26.58978 | 25.89504 | 26.317   | 26.49076 |
| 26.317   | 26.48922 | 27.09144 | 26.28383 | 25.88344 | 25.88577 | 24.85757 | 24.47383 | NaN      |
| 25.52253 | 25.83605 | 26.21697 | 26.32903 | 26.61807 | 26.63201 | 25.06085 | 24.46762 | 24.49838 |
| 29.31095 | 29.42342 | 29.26696 | 28.12139 | 28.32817 | 28.2803  | 27.90885 | 28.00838 | 28.00838 |
| 27.43936 | 27.27142 | 27.20769 | 27.41538 | 27.33245 | 27.43141 | 28.1795  | 28.24445 | 28.18423 |
| 26.22803 | 26.04635 | 26.37617 | 26.15653 | 25.98902 | 26.13124 | 25.98468 | 26.1757  | 26.12337 |
| 26.23717 | 26.47073 | 25.91798 | 26.22803 | 25.90426 | 25.92025 | 26.20396 | 26.27598 | 26.28207 |
| 25.02327 | 25.32045 | 24.09346 | 24.18707 | 24.92705 | 24.72338 | 25.05672 | 25.67842 | 25.60964 |
| 23.04427 | 23.32389 | 24.61526 | 24.67034 | 25.00624 | 25.05672 | 27.63893 | 27.72598 | 27.43936 |
| 29.82941 | 29.7973  | 29.83996 | 30.33031 | 30.31959 | 30.29789 | 30.04791 | 29.92592 | 29.95394 |
| 32.15738 | 31.02828 | 32.20478 | 31.36202 | 31.25912 | 31.28692 | 29.05051 | 28.95394 | 29.12139 |
| 28.72923 | 29.00303 | 28.93719 | 29.04531 | 28.99766 | 29.04009 | 28.73247 | 28.5969  | 28.52776 |
| 25.98468 | 26.2856  | 26.3256  | 26.15267 | 26.02115 | 26.10949 | 26.18935 | 27.78332 | 28.41538 |
| 24.98033 | 25.40406 | 25.29964 | 25.01052 | 24.94056 | 25.02327 | 25.79203 | 24.97596 | 25.5285  |
| 28.28912 | 28.391   | 28.29789 | 28.16997 | 27.93719 | 28.16997 | 26.90885 | 26.73892 | 26.55655 |
| 27.91456 | 27.22619 | 27.44727 | 26.20955 | 27.06085 | 26.60399 | 23.58692 | 24.36453 | NaN      |
| 29.18187 | 29.31959 | 29.17474 | 29.12386 | 29.01903 | 29.04531 | 29.16279 | 29.19835 | 29.2803  |
| 26.12928 | NaN      | 25.22066 | 25.9955  | 26.22251 | 25.51653 | 27.2535  | 27.38278 | 27.56092 |
| 31.07368 | 31.0927  | 31.00838 | 31.31419 | 31.17831 | 31.27586 | 31.14224 | 31.09899 | 31.14831 |
| NaN      | NaN      | NaN      | 24.6971  | 28.49762 | NaN      | 25.44253 | 26.20023 | 25.86938 |
| 26.81421 | 26.95394 | 26.78955 | 27.06085 | 27.23535 | 27.43936 | 26.86231 | 26.239   | 26.65949 |
| 28.85638 | 29.0296  | 28.71293 | 29.12879 | 29.06856 | 29.26024 | 28.69312 | 28.62506 | 28.56092 |
| 25.56384 | 26.18707 | 25.85281 | 25.96939 | 25.48308 | 25.67303 | 25.9955  | 26.2856  | 26.09949 |
| 29.2803  | 29.38278 | 29.22389 | 29.68144 | 29.5862  | 29.69312 | 27.16997 | 27.69312 | 26.95394 |
| 24.6971  | 23.33756 | 24.1332  | 26.44095 | 26.4567  | 26.239   | 26.96499 | 27.05051 | 26.96499 |
| 26.07521 | 24.77957 | 26.60399 | 25.60964 | 24.73376 | 25.45826 | 27.64581 | 27.24445 | 27.12139 |
| 26.80193 | 26.80193 | 26.87408 | 26.31008 | 26.54333 | 26.60399 | 27.52402 | 27.3662  | 27.42342 |
| 25.23169 | 25.88344 | 25.86231 | 26.69975 | 26.01691 | 26.34096 | 24.44884 | 24.54628 | 24.99766 |
| 28.71947 | 29.01105 | 28.45513 | 28.36202 | 28.51277 | 28.52402 | 26.89735 | 26.80838 | 26.63201 |
| 29.81879 | 29.88867 | 29.92592 | 30.28692 | 30.2535  | 30.29789 | 30.02168 | 30.00838 | 30.11148 |
| 28.08132 | 28.34942 | 28.09648 | 28.19366 | 28.10149 | 28.12633 | 28.90885 | 28.80501 | 28.87994 |
| 26.25169 | 26.13516 | 26.46295 | 26.06907 | 25.90885 | 25.92252 | 26.42342 | 26.31181 | 26.87408 |
| 28.29789 | 28.16997 | 28.11644 | 28.09648 | 28.16997 | 28.16039 | 28.54259 | 28.64581 | 28.65608 |
| 23.42982 | 23.6971  | 23.391   | NaN      | 22.27355 | 25.11347 | 25.61526 | 25.54333 | 27.07112 |
| 31.39816 | 31.75334 | 31.40832 | 31.43837 | 31.37244 | 31.52028 | 30.7211  | 31.02168 | 30.87555 |
| 27.49381 | 27.82031 | 27.46295 | 27.55362 | 27.44727 | 27.16039 | 27.13124 | 26.99766 | 27.34942 |
| 26.58978 | 27.00838 | 26.47228 | 26.67303 | 26.60399 | 26.46139 | 26.42342 | 26.49838 | 26.15267 |
| 23.92252 | 24.23169 | 23.81909 | 21.18253 | 21.66275 | 21.65403 | 25.98251 | 26.78955 | 25.90426 |
| 27.63893 | 27.63201 | 27.62506 | 27.11148 | 27.24445 | 27.28912 | 26.9428  | 26.61807 | 26.71293 |
| 28.33245 | 28.43141 | 28.24898 | 28.62157 | 28.63547 | 28.57903 | 27.05051 | 28.03486 | 27.47073 |
| 26.72598 | 26.07316 | 26.81421 | 27.04009 | 27.01903 | 26.85043 | 26.87408 | 27.2803  | 27.39917 |
| 28.81726 | 28.91741 | 28.86526 | 28.62506 | 28.77706 | 28.70965 | 28.64238 | 28.66289 | 28.63201 |
| 26.86231 | 27.06085 | 26.77706 | 27.08132 | 26.92025 | 26.86231 | 26.60399 | 26.87408 | 26.73892 |
| 26.55215 | 26.83846 | 26.51202 | 26.75175 | 26.36786 | 26.35783 | 26.73892 | 27.0296  | 26.87408 |
| 25.74919 | 25.68913 | 25.10949 | 25.85994 | 25.7024  | 26.03591 | 25.85043 | 26.30487 | 25.74919 |
| 28.64238 | 28.94    | 28.70965 | 28.16519 | 27.98142 | 28.23535 | 26.71293 | 26.37285 | 26.73892 |
| 35.09899 | 35.02663 | 35.17905 | 34.22647 | 34.21928 | 34.38278 | 33.21928 | 33.33031 | 33.13155 |
| 27.5969  | 27.74535 | 27.69312 | 27.83846 | 27.71947 | 27.83244 | 27.78244 | 27.57542 | 27.93719 |
| 26.83846 | 25.64581 | 26.49686 | 26.69975 | 26.391   | 26.56384 | 27.16997 | 26.90885 | 27.57542 |
| 26.99766 | 27.22619 | 27.00838 | 27.0296  | 26.80193 | 26.89735 | NaN      | NaN      | NaN      |
| 26.86231 | 26.87408 | 26.97596 | 26.41538 | 26.31354 | 26.22803 | 26.85043 | 26.61807 | 26.83846 |
| 25.04009 | 25.1946  | 25.36786 | 26.50446 | 25.97378 | 26.38278 | 25.88344 | 25.65949 | 26.00196 |
| 27.10149 | 27.07112 | 26.80193 | 27.06085 | 27.04009 | 26.96499 | 27.34096 | 27.5389  | 27.68646 |
| 27.2803  | 27.10149 | 27.18896 | 26.81421 | 26.97596 | 26.9428  | 26.56092 | 26.40892 | 26.63201 |
| 29.30878 | 28.92592 | 29.06599 | 28.71947 | 28.78332 | 28.9428  | 26.72598 | 27.82031 | 27.19835 |
| 26.86231 | 27.3662  | 27.1795  | 27.43141 | 27.61105 | 27.509   | 22.58003 | 24.42982 | 24.417   |
| 25.82396 | 26.57398 | 26.02327 | 26.22066 | 26.58978 | 26.78955 | 27.27142 | 27.19835 | 27.20769 |
| 26.65949 | 27.19835 | 26.49686 | 27.61807 | 26.58978 | 27.15074 | 26.31354 | 25.75175 | 25.8811  |
| 27.00838 | 26.97596 | 27.15074 | 26.86231 | 26.68646 | 26.63201 | 26.69975 | 26.95394 | 26.85043 |
| 26.38113 | 25.12139 | 26.08335 | 26.26249 | 26.20583 | 26.78955 | 25.62087 | 25.06497 | 25.31354 |
| 26.20769 | 26.20769 | 25.93832 | 26.58978 | 26.61807 | 26.61807 | 26.51051 | 26.48155 | 26.57542 |
| 28.33671 | 28.52402 | 28.20303 | 28.34942 | 28.10649 | 28.34096 | 27.57542 | 27.75175 | 27.73247 |
| 26.78955 | 26.83846 | 27.2803  | 26.32732 | 26.37948 | 26.58978 | 26.51352 | 26.96499 | 26.61807 |
| 25.45199 | 25.39428 | 25.34773 | 25.52552 | 25.39428 | 25.71555 | 24.41054 | 24.91798 | 24.67034 |
| 27.67976 | 27.85043 | 27.67303 | 27.95947 | 27.85043 | 28.06599 | 27.95947 | 28.7408  | 28.03486 |
| 28.22619 | 28.38278 | 28.27142 | 28.23078 | 27.92025 | 28.00838 | 28.05051 | 27.99226 | 27.83846 |
| 25.54628 | 25.8811  | 24.87643 | 26.22435 | 26.23169 | 26.00838 | 26.96499 | 26.75175 | 26.61807 |
| 27.69312 | 28.0296  | 27.95947 | 28.18896 | 28.05051 | 28.04009 | 27.34942 | 27.14102 | 27.13124 |
| 27.41538 | 27.43141 | 27.57542 | 27.2535  | 27.43936 | 27.47846 | 27.52402 | 27.51653 | 27.45513 |
| 26.76446 | 26.24264 | 26.75175 | 26.45199 | 26.23535 | 26.61807 | 27.20769 | 26.61807 | 26.71293 |
| 27.93157 | 28.18423 | 28.07112 | 28.43936 | 28.4746  | 28.44332 | 28.46684 | 28.24898 | 28.32817 |

|          |          |          |          |          |          |          |          |          |
|----------|----------|----------|----------|----------|----------|----------|----------|----------|
| NaN      | 23.6971  | 24.60964 | 24.98468 | NaN      | 24.01903 | 26.32732 | 26.20583 | 26.23535 |
| 27.11148 | 27.65949 | 27.05051 | 27.52402 | 27.35783 | 27.45513 | 27.43141 | 27.5969  | 27.509   |
| 27.5389  | 27.78332 | 27.62506 | 27.71947 | 27.73247 | 27.87994 | 26.80193 | 26.48769 | 26.86231 |
| 27.67303 | 27.96499 | 25.65403 | 25.64856 | 26.42822 | 26.27142 | 26.37119 | 26.86231 | 26.14297 |
| 28.08132 | 28.63547 | 28.258   | 28.16039 | 28.22159 | 28.20769 | 27.63201 | 27.77077 | 27.73892 |
| 25.51953 | 24.71293 | 24.49228 | 25.84326 | 25.38772 | 24.76446 | 26.81421 | 26.92025 | 26.53297 |
| 26.16039 | 25.97378 | 26.15653 | 26.60399 | 26.27142 | 27.06085 | 25.44884 | 25.01478 | 25.53742 |
| 28.29351 | 28.33671 | 28.49762 | 28.4512  | 28.62854 | 28.41135 | 28.3662  | 28.27142 | 28.47846 |
| 29.53705 | 29.71293 | 29.509   | 29.04009 | 29.104   | 29.27586 | 29.07623 | 29.16279 | 28.91456 |
| 27.23535 | 27.58978 | 27.16997 | 27.27142 | 27.19835 | 27.04009 | 26.41538 | 26.61807 | 26.64581 |
| 25.83364 | 25.65949 | 25.56092 | 25.75685 | 26.68646 | 26.72598 | 25.9955  | 26.69975 | 26.2589  |
| 27.11148 | 27.30661 | 27.12139 | 27.16039 | 26.96499 | 27.19835 | 27.3662  | 27.2803  | 27.391   |
| 27.55362 | 28.59335 | 27.61807 | 27.31527 | 27.27142 | 26.95394 | NaN      | NaN      | NaN      |
| 27.57542 | 27.65267 | 27.81421 | 27.87994 | 27.78332 | 27.85638 | 27.91456 | 27.82031 | 27.99766 |
| 26.57542 | 26.23535 | 26.58978 | 26.61807 | 26.49228 | 26.43301 | 25.04009 | 24.98468 | 24.71816 |
| 23.51653 | 23.85757 | 23.82881 | 24.47383 | 23.48001 | 24.1946  | 25.51653 | 25.08537 | 25.59263 |
| 27.52402 | 27.73247 | 27.45513 | 26.97596 | 26.97596 | 27.09144 | 27.14102 | 27.04009 | 27.05051 |
| 28.82941 | 29.04009 | 29.06856 | 27.89157 | 28.48999 | 28.01903 | 27.47073 | 27.78332 | 27.77077 |
| 27.13124 | 27.28912 | 26.89735 | 27.56819 | 27.91456 | 27.05051 | 24.35111 | 23.32389 | 24.54038 |
| 25.1332  | 25.43301 | 25.12534 | 25.24627 | 25.37119 | 25.05672 | 25.59548 | 25.95188 | 25.76446 |
| 29.15798 | 29.40933 | 29.06599 | 29.20303 | 29.14589 | 29.1866  | 28.95394 | 28.78955 | 28.93438 |
| 29.19131 | 29.23535 | 29.06599 | 28.89446 | 29.08385 | 29.02168 | 28.95394 | 29.15557 | 28.81726 |
| 26.24808 | 26.54185 | 26.88577 | 27.16039 | 27.06085 | 27.20769 | 25.17188 | 25.45513 | 25.37119 |
| 28.71947 | 28.60399 | 28.52402 | 28.45513 | 28.42342 | 28.27586 | 26.90885 | 26.58978 | 26.54775 |
| 24.90426 | 25.51352 | 24.76446 | 24.89041 | 25.08132 | 24.84805 | 25.21697 | 24.97596 | 25.50142 |
| 25.98685 | 25.58118 | 25.44569 | 25.53148 | 25.67573 | 25.77706 | 25.17188 | 26.02538 | 25.75939 |
| 25.08132 | 25.02749 | 25.18329 | 24.91798 | 24.83846 | 24.90885 | 25.20955 | 25.07316 | 25.391   |
| 24.04427 | 24.34435 | 24.10149 | 23.63201 | 24.11744 | 23.50446 | 24.63201 | 24.78457 | 24.31008 |
| 27.34942 | 27.0296  | 27.30661 | 27.04009 | 27.2803  | 27.33245 | 27.15074 | 27.28912 | 27.1795  |
| 25.49838 | 25.52253 | 25.53148 | 25.30661 | NaN      | NaN      | NaN      | NaN      | NaN      |
| 27.48616 | 27.43141 | 27.19835 | 27.51653 | 27.5389  | 27.61807 | 27.80193 | 27.82639 | 27.78332 |
| 27.43936 | 27.35783 | 27.53148 | 27.81421 | 27.81421 | 28.19366 | 27.79576 | 27.14102 | 26.98685 |
| 26.61807 | 26.75175 | 26.4346  | 26.64581 | 26.82639 | 26.76446 | 27.5969  | 27.42342 | 27.42342 |
| 26.49534 | 25.9428  | 26.29439 | 26.85043 | 25.54922 | 26.35951 | 26.78955 | 26.65949 | 26.54628 |
| 25.24989 | 24.84326 | 24.65403 | 25.03171 | 24.86703 | 24.93157 | 25.31354 | 24.85281 | 25.239   |
| 27.06085 | 26.99766 | 26.95394 | 26.61807 | 26.53297 | 26.64581 | 26.21697 | 26.12731 | 26.07316 |
| 26.75175 | 26.58978 | 26.78955 | 26.38936 | 27.07112 | 27.45513 | 25.01052 | 24.85281 | 24.94949 |
| 26.61807 | 26.72598 | 26.39428 | 26.42982 | 26.86231 | 26.47846 | 27.47073 | 27.26249 | 27.391   |
| NaN      | 24.99766 | 25.05258 | 25.04009 | 24.98033 | 25.29614 | 25.60682 | 25.47692 | 25.27142 |
| 23.57542 | 23.56384 | NaN      | 22.69285 | 22.9812  | NaN      | 25.98033 | 26.12534 | 26.1795  |
| 25.22435 | 26.05258 | 25.96939 | 25.54922 | 25.83605 | 25.50749 | 25.76699 | 25.74919 | 25.76192 |
| 25.08942 | 25.1757  | 25.01903 | 24.50446 | 24.51653 | 24.67034 | 24.35783 | NaN      | 24.68646 |
| 28.04531 | 28.41941 | 28.31959 | 28.60045 | 28.63547 | 28.61456 | 28.94    | 28.94838 | 28.67303 |
| 26.65949 | 26.80193 | 26.67303 | 26.48769 | 26.44253 | 26.41216 | 26.76446 | 26.78955 | 26.78955 |
| 27.21697 | 26.72598 | 26.86231 | 26.53445 | 26.9428  | 26.63201 | 24.2535  | 23.92252 | 24.46139 |
| 28.58262 | 28.52776 | 28.27142 | 26.60399 | 26.65949 | 26.42982 | 21.8423  | NaN      | NaN      |
| 26.69975 | 26.67303 | 25.85519 | 26.24627 | 26.21141 | 26.17379 | 29.12386 | 29.15798 | 28.66628 |
| 27.69975 | 27.88577 | 27.34942 | 27.75812 | 27.47846 | 27.63893 | 27.74535 | 27.5969  | 27.5389  |
| 27.12139 | 27.13124 | 27.04009 | 26.51051 | 26.51503 | 26.67303 | 27.07112 | 27.08132 | 27.12139 |
| 23.93157 | NaN      | 24.17188 | 25.33415 | 25.54038 | 25.04009 | 26.42502 | 26.52402 | 26.26607 |
| 24.10949 | 24.08537 | 24.44884 | NaN      | 23.42982 | 23.87643 | 23.84805 | 24.06907 | NaN      |
| 32.16639 | 31.42842 | 32.11458 | 31.78097 | 31.6501  | 31.90096 | 30.40324 | 30.38278 | 30.91171 |
| NaN      | NaN      | 19.54321 | NaN      | NaN      | NaN      | 29.14346 | 28.84446 | 28.49381 |
| 28.4512  | 28.05569 | 28.509   | 27.83846 | 27.95947 | 28.05569 | 28.96224 | 28.72598 | 28.81726 |
| 29.31527 | 29.65438 | 29.48999 | 30.11148 | 29.92592 | 29.77863 | 28.85935 | 28.86231 | 28.83244 |
| 27.08132 | 26.60399 | 27.16039 | 27.47073 | 27.391   | 27.19835 | 25.7024  | 26.1757  | 26.1055  |
| 30.03486 | 30.21928 | 30.03486 | 30.26472 | 30.11148 | 30.16039 | 29.41337 | 29.3662  | 29.48999 |
| 26.68646 | 26.58978 | 26.60399 | 26.86231 | 26.55508 | 26.55801 | 26.51352 | 26.1946  | 26.31527 |
| 26.36786 | 26.55655 | 26.24445 | 26.86231 | 26.68646 | 26.69975 | 26.96499 | 26.80193 | 26.82639 |
| 28.37451 | 28.26249 | 28.391   | 27.29789 | 27.55362 | 27.57542 | 22.37782 | 23.57542 | 22.08537 |
| 26.72598 | 27.08132 | 26.97596 | 27.11148 | 26.55215 | 25.63201 | 25.83123 | 26.44411 | 25.87643 |
| 29.66628 | 29.5969  | 29.64581 | 29.43539 | 29.4073  | 29.32817 | 29.14589 | 29.07877 | 29.14831 |
| 28.63201 | 28.76762 | 28.69644 | 28.67976 | 28.52776 | 28.50522 | 28.77706 | 28.78019 | 28.82335 |
| 23.29614 | 24.41054 | 25.1055  | 23.71816 | 24.54038 | 24.07725 | 26.03171 | 25.83123 | 26.2856  |
| 25.32045 | 25.07316 | 25.73635 | 25.51352 | 25.84805 | 25.73892 | 25.01903 | 25.01903 | 25.05258 |
| 27.63201 | 27.56819 | 27.51653 | 28.02433 | 28.09144 | 28.31527 | 26.64581 | 26.56092 | 26.73892 |
| 26.09346 | 26.22619 | 26.41377 | 26.18329 | 25.9955  | 26.20955 | 25.36119 | 25.28207 | 25.32045 |
| 27.1795  | 26.83846 | 27.24445 | 26.77706 | 26.75175 | 26.45199 | 27.16997 | 27.34942 | 27.45513 |
| 25.45826 | 25.45826 | 25.91114 | 25.71555 | 25.99766 | 26.10949 | 24.80931 | 25.07316 | 24.51653 |
| 29.87115 | 29.54075 | 29.86378 | 29.61281 | 29.96774 | 29.7911  | 29.53334 | 29.7211  | 29.98142 |
| 27.0296  | 27.33245 | 27.09144 | 27.91456 | 27.58262 | 27.60399 | 26.41538 | 27.26249 | 26.69975 |
| 32.7751  | 32.6501  | 33.02168 | 32.36724 | 32.45807 | 32.55728 | 31.45807 | 31.80039 | 31.61982 |
| 26.43936 | 25.88577 | 26.04843 | 26.19084 | 26.63201 | 26.15846 | NaN      | 27.21697 | 24.54628 |
| 27.11148 | 26.99766 | 27.11148 | 27.391   | 27.56819 | 27.46295 | 27.14102 | 27.10149 | 27.19835 |
| 26.69975 | 26.83846 | 26.58978 | 26.72598 | 26.78955 | 26.42021 | 26.95394 | 26.95394 | 26.69975 |
| 27.2535  | 27.0296  | 27.12139 | 27.09144 | 27.10149 | 27.10149 | 27.5389  | 27.63201 | 27.53148 |
| 29.77549 | 29.77235 | 30.00838 | 30.28692 | 30.27586 | 30.4919  | 29.87555 | 29.87115 | 30.07368 |
| 25.36119 | 25.82396 | 25.73117 | 25.88809 | 25.43936 | 25.03171 | 26.15653 | 25.93607 | 26.24989 |
| 27.58262 | 28.0296  | 27.92592 | 28.60752 | 28.33245 | 28.2803  | 28.43539 | 28.41941 | 28.4746  |
| 30.48232 | 30.61982 | 30.4334  | 30.69644 | 30.51089 | 30.68813 | 31.16039 | 30.78488 | 30.9746  |
| 29.02168 | 29.13124 | 29.54995 | 29.16039 | 29.00035 | 29.21234 | 29.99496 | 29.98142 | 29.83394 |
| 24.97596 | NaN      | 24.42982 | 23.88577 | NaN      | 24.33756 | 26.12337 | 26.20583 | 27.09144 |
| 27.13124 | 27.09144 | 27.21697 | 26.63201 | 26.77706 | 27.0296  | 27.49381 | 27.32389 | 27.38278 |
| 26.67303 | 26.12139 | 26.12337 | 26.39591 | 26.4073  | 26.2856  | 25.4073  | 25.19084 | 24.91342 |
| 26.55508 | 27.19835 | 26.57542 | 27.67976 | 27.3662  | 27.07112 | 26.30835 | 27.13124 | 26.16806 |
| 26.69975 | 27.00838 | 27.39917 | 27.56819 | 27.56819 | 28.08639 | 28.22619 | 28.28912 | 28.00838 |
| 27.11148 | 26.9428  | 27.3662  | 26.83846 | 27.10149 | 27.10149 | 27.0296  | 27.15074 | 27.10149 |
| 27.20769 | 27.62506 | 27.33245 | 27.15074 | 27.34096 | 27.04009 | 27.35783 | 27.34096 | 27.34942 |

|          |          |          |          |          |          |          |          |          |
|----------|----------|----------|----------|----------|----------|----------|----------|----------|
| 26.50446 | 26.93157 | 26.98685 | 26.63201 | 26.55215 | 26.61807 | 27.35783 | 27.0296  | 27.19835 |
| 28.27142 | 28.29351 | 28.07623 | 26.77706 | 27.07112 | 27.391   | NaN      | 24.27498 | NaN      |
| 28.58978 | 26.90885 | 28.37036 | 28.86821 | 28.76129 | 28.95116 | NaN      | NaN      | NaN      |
| 24.98902 | 24.06907 | 24.35111 | NaN      | 24.33074 | 24.23169 | 26.11942 | 25.44253 | 25.53148 |
| 25.53148 | 25.317   | 25.24627 | 25.26428 | 25.8811  | 25.61807 | 26.20023 | 25.20955 | 25.22435 |
| 26.52402 | 27.15074 | 26.18518 | 26.38772 | 26.31527 | 26.37285 | NaN      | NaN      | NaN      |
| 27.42342 | 27.55362 | 27.37451 | 27.57542 | 27.1795  | 27.16997 | 26.97596 | 27.53148 | 27.66628 |
| 24.6971  | 25.6971  | 26.1035  | 26.00838 | 25.49228 | 25.30661 | 25.58692 | 26.65949 | 26.35616 |
| 25.12534 | 25.48922 | 25.239   | 25.12139 | 25.33756 | 25.03591 | 25.84566 | 25.9955  | 25.7103  |
| 28.37451 | 28.65267 | 28.06085 | 28.43141 | 28.5969  | 27.98142 | 29.11644 | 28.98956 | 29.34942 |
| 26.52552 | 26.04635 | 26.06085 | 26.33756 | 26.04843 | 25.90656 | 25.80193 | 26.63201 | 26.42982 |
| 26.52402 | 24.64306 | 26.36953 | 25.92705 | 25.88577 | 26.85043 | 27.2535  | 27.22619 | 27.31527 |
| 25.86938 | 26.05466 | 25.55215 | 26.1488  | 26.77706 | 26.97596 | 24.79452 | 24.55801 | 24.80931 |
| 26.77706 | 26.89735 | 27.24445 | 26.36786 | 26.36119 | 26.1757  | NaN      | NaN      | NaN      |
| 25.54038 | 24.89041 | 25.239   | 24.59263 | 25.12928 | 24.83846 | 25.14492 | 24.54628 | 24.07725 |
| 25.06085 | 25.53445 | 25.53742 | NaN      | 25.02749 | 25.54333 | 25.32045 | 25.54922 | 26.50294 |
| 27.80193 | 27.87408 | 27.78332 | 27.27142 | 27.2535  | 27.39917 | 27.01903 | 26.85043 | 26.68646 |
| 25.44884 | 25.67842 | 25.34773 | 25.56964 | 25.12534 | 25.38443 | 25.56674 | 25.48001 | 25.58692 |
| 29.0296  | 29.13124 | 28.85341 | 28.61807 | 28.57181 | 28.69644 | 27.00838 | 26.9428  | 27.01903 |
| 27.14102 | 27.09144 | 27.10149 | 27.28912 | 27.20769 | 27.43936 | 27.04009 | 26.85043 | 27.07112 |
| 27.26249 | 27.47073 | 27.22619 | 27.72598 | 27.66628 | 27.69975 | 26.85043 | 26.78955 | 26.86231 |
| 24.40406 | 24.23169 | 25.50446 | 24.2535  | 24.00196 | 23.391   | 25.57254 | 25.06085 | 24.50446 |
| NaN      | NaN      | NaN      | 24.91798 | NaN      | 23.94949 | 24.91342 | 25.32732 | 24.87643 |
| 25.65949 | 25.38443 | 25.22435 | 26.15846 | 25.93157 | 25.8811  | 26.72598 | 26.82639 | 26.90885 |
| 25.47383 | 25.72858 | 25.53742 | 25.52552 | 25.26785 | 25.49838 | 25.83364 | 26.08537 | 25.75685 |
| 26.41216 | 26.14686 | 26.21512 | 26.20583 | 26.29964 | 26.03171 | 24.45513 | 25.51953 | 25.22803 |
| 27.64581 | NaN      | 24.44253 | 22.78157 | 24.42342 | 26.63201 | 25.27853 | 23.66492 | 24.72858 |
| 25.58692 | 23.13946 | 25.22803 | 25.55508 | 25.56092 | 25.46139 | 26.03591 | 25.54628 | 26.05879 |
| 27.14102 | 26.53148 | 27.07112 | 26.04427 | 25.89041 | 26.4073  | 25.21327 | 24.82881 | 25.06907 |
| 26.45199 | 26.30835 | 26.37285 | 26.69975 | 26.88577 | 27.0296  | 26.11545 | 26.23352 | 25.72338 |
| 25.51352 | 25.70504 | 25.64581 | 25.97378 | 25.75175 | 25.72598 | 25.24627 | 25.16039 | 25.40406 |
| 25.94503 | 25.67573 | 25.61246 | 25.46451 | 25.51653 | 25.1332  | 25.81665 | 26.04635 | 25.86938 |
| 27.97596 | 27.97596 | 27.93157 | 28.16997 | 28.27142 | 28.1795  | 28.1795  | 28.39917 | 28.31527 |
| 26.23352 | 26.61807 | 26.03171 | 26.49381 | 26.39917 | 25.81909 | 26.18707 | 25.97596 | 26.05466 |
| 26.69975 | 27.04009 | 26.64581 | 27.1795  | 27.08132 | 27.14102 | 27.92592 | 27.83846 | 27.91456 |
| 25.64581 | 24.76446 | 26.56964 | 24.95394 | 26.26964 | 26.44884 | NaN      | 22.25638 | 21.26499 |
| 26.00624 | 25.96279 | 25.98902 | 26.27853 | 26.1035  | 26.00624 | 27.26249 | 26.93157 | 27.1795  |
| 26.27498 | 26.37782 | 26.27853 | 26.07725 | 26.19272 | 26.07521 | 26.35279 | 27.09144 | 25.95837 |
| 27.61807 | 27.77077 | 27.4073  | 25.33756 | 25.18329 | 25.81176 | NaN      | 22.70345 | NaN      |
| 28.60399 | 28.5969  | 28.53519 | 28.36202 | 28.33671 | 28.5862  | 22.47754 | NaN      | NaN      |
| 26.07725 | 25.74663 | 26.31008 | 26.391   | 26.41216 | 26.60399 | 27.24445 | 27.06085 | 27.05051 |
| 29.95394 | 29.88722 | 29.86231 | 30.2535  | 30.37244 | 30.45317 | 29.5591  | 29.391   | 29.3452  |
| 26.4008  | 25.85519 | 26.37285 | 26.69975 | 26.44884 | 26.54922 | NaN      | 22.38311 | 24.20955 |
| 26.77706 | 26.54775 | 26.41377 | 26.65949 | 26.55508 | 26.68646 | 27.2535  | 27.0296  | 27.35783 |
| 27.18896 | 27.08132 | 27.12139 | 27.43141 | 27.42342 | 27.50142 | 26.48155 | 26.73892 | 26.07928 |
| 25.1055  | 25.52253 | 25.1795  | 25.82153 | 25.66221 | 25.90426 | 26.46607 | 25.67573 | 26.29263 |
| NaN      | 25.35783 | NaN      | 24.98033 | NaN      | NaN      | 28.7162  | 28.6764  | 28.23078 |
| 28.72598 | 28.32389 | 28.52402 | 28.84146 | 28.79885 | 28.95671 | 28.53519 | 28.46295 | 28.4746  |
| 29.32603 | 29.33031 | 29.36202 | 29.61456 | 29.60399 | 29.7597  | 29.4453  | 29.23306 | 29.42542 |
| 25.58405 | 25.43619 | 25.79699 | 26.13124 | 26.98685 | 27.16997 | NaN      | 23.07235 | NaN      |
| 25.17188 | 25.50749 | 25.28912 | 25.04843 | 25.94726 | 25.73117 | 24.67034 | 24.97596 | 25.00624 |
| 26.63201 | 26.77706 | 26.83846 | 26.78955 | 26.75175 | 26.78955 | 27.29789 | 27.26249 | 27.19835 |
| 28.05051 | 28.01903 | 27.58978 | 27.47846 | 27.1795  | 27.43141 | NaN      | NaN      | NaN      |
| 26.24082 | 24.57542 | 24.32389 | 26.82639 | 26.99766 | 26.64581 | 27.52402 | 26.89735 | 27.55362 |
| 26.07725 | 26.45356 | 25.38443 | 26.63201 | 26.63201 | 26.30138 | 26.16997 | 26.53742 | 25.51051 |
| 25.90426 | 25.97596 | 25.76951 | 25.19084 | 25.28207 | 25.42021 | 25.45513 | 25.48922 | 25.66763 |
| 26.04218 | 26.00838 | 26.05879 | 25.79947 | 25.58692 | 25.85757 | 24.86703 | 25.42982 | 25.46762 |
| 25.45513 | 25.33756 | 25.46451 | 24.76446 | NaN      | 24.60964 | 25.27142 | 25.20583 | 25.63478 |
| 26.30487 | 25.78457 | 26.01903 | 26.18896 | 25.82396 | 26.0041  | 26.57254 | 26.32045 | 26.39754 |
| 26.22435 | 26.36453 | 26.12337 | 26.54333 | 26.61807 | 26.40406 | 26.26428 | 25.60682 | 25.97596 |
| 23.56384 | 24.42982 | NaN      | 25.08537 | 24.99335 | 25.07725 | 25.93157 | 25.83605 | 25.77455 |
| 25.88577 | 26.20583 | 25.85281 | 25.81909 | 25.4008  | 25.03171 | 26.13124 | 25.80686 | 26.04843 |
| 25.38772 | 25.79947 | 25.97378 | 25.96499 | 25.12534 | 25.1757  | 24.72338 | 24.31008 | 23.60964 |
| 23.32389 | 24.06907 | 24.79452 | 23.49228 | 23.44253 | 21.66275 | 26.46762 | 26.46295 | 26.55801 |
| 26.88577 | 27.33245 | 27.10149 | 26.88577 | 26.65949 | 26.58978 | 24.26069 | 24.01052 | 24.91798 |
| 25.08132 | 25.38113 | 24.84326 | 25.00624 | 24.92252 | 24.98033 | NaN      | NaN      | NaN      |
| 26.80193 | 27.12139 | 26.98685 | 26.82639 | 26.87408 | 26.86231 | 27.11148 | 27.391   | 27.11148 |
| 26.76446 | 27.12139 | 26.78955 | 27.19835 | 27.26249 | 27.14102 | 26.09346 | 26.04427 | 25.41054 |
| 25.73635 | 25.7024  | 26.03591 | 26.05879 | 26.038   | 26.05258 | 26.49686 | 26.55508 | 26.41216 |
| 24.62087 | 24.34435 | NaN      | 24.8044  | 23.67573 | 25.44253 | 24.32389 | 25.94056 | 25.69975 |
| 26.02538 | 24.59263 | 24.11744 | 24.1795  | NaN      | 24.58692 | 23.94949 | 24.33756 | NaN      |
| 24.79452 | 24.57542 | 23.2535  | 23.85757 | 26.38607 | 24.18707 | 25.30661 | 25.86467 | 25.90426 |
| NaN      | NaN      | NaN      | NaN      | NaN      | NaN      | 24.83846 | 24.81421 | 24.67573 |
| 24.93157 | 25.16423 | 24.37782 | 25.01052 | 24.76951 | 25.14492 | 25.84805 | 25.7543  | 25.69179 |
| 29.06343 | 29.68979 | 28.61456 | 28.5862  | 28.79885 | 28.35783 | 29.53148 | 29.07368 | 29.03486 |
| 23.71816 | 25.61807 | 23.99335 | 25.10149 | 25.26069 | 25.26069 | 26.34266 | 25.86231 | 26.01478 |
| 27.77077 | 28.15074 | 26.19272 | 25.16039 | 25.53742 | 25.16806 | 23.55215 | 21.61863 | NaN      |
| 27.67303 | 27.73892 | 27.65267 | 27.71293 | 27.64581 | 27.90885 | 27.28912 | 27.0296  | 27.42342 |
| 25.76446 | 25.61246 | 25.52253 | 26.29439 | 26.56092 | 26.05258 | 25.78706 | 26.34266 | 26.1488  |
| 26.44095 | 26.29263 | 26.45042 | 26.42502 | 26.45042 | 26.52999 | 26.48616 | 26.23352 | 26.30835 |
| 25.75175 | 27.30661 | 26.37285 | 26.12139 | 26.01478 | 27.30661 | 24.58692 | 24.50438 | 25.81909 |
| 25.09748 | 25.94503 | 24.97158 | 24.417   | 24.55215 | 25.42982 | NaN      | NaN      | NaN      |
| 26.48308 | 26.02749 | 26.78955 | 26.08132 | 27.12139 | 26.39591 | 24.81421 | 24.15653 | 24.07725 |
| 26.20396 | 26.0041  | 26.24808 | 26.44727 | 26.44727 | 26.72598 | 26.21327 | 26.82639 | 26.35279 |
| 25.30313 | 24.51051 | 25.2571  | 25.82153 | 25.46139 | 25.32045 | 25.4073  | 24.87173 | 25.69179 |
| 24.69179 | 24.94056 | 24.42982 | 24.94503 | 24.85281 | 24.88577 | 24.50446 | 24.44884 | 24.79452 |
| 25.62087 | 26.60399 | 25.37119 | 25.08942 | 25.54038 | 25.61807 | 25.35111 | 25.80193 | 25.42982 |
| 27.65267 | 27.19835 | 27.05051 | 26.58978 | 26.99766 | 27.15074 | 25.39428 | 25.8044  | NaN      |

|          |          |          |          |          |          |          |          |          |
|----------|----------|----------|----------|----------|----------|----------|----------|----------|
| 28.34096 | 28.53519 | 28.3452  | 28.44332 | 28.31095 | 28.56819 | NaN      | NaN      | NaN      |
| 27.76446 | 27.80193 | 27.47073 | 28.00303 | 28.06599 | 27.96499 | 26.99766 | 26.95394 | 26.9428  |
| 25.82153 | 24.7543  | 24.99766 | 24.8044  | 25.10949 | 25.75685 | 24.03591 | 23.31008 | 22.55918 |
| 25.16806 | 25.74919 | 25.92705 | 26.12139 | 26.54038 | 25.81665 | 24.1488  | 23.74919 | 23.95837 |
| 26.27142 | 26.44727 | 26.23535 | 26.69975 | 26.89735 | 26.72598 | 25.53445 | 25.77957 | 25.75685 |
| 29.04791 | 28.87701 | 28.92592 | 28.74535 | 28.87701 | 28.82335 | 28.92592 | 28.86526 | 28.78644 |
| 28.07112 | 28.41538 | 27.93157 | 28.07112 | 28.22159 | 28.26249 | 27.0296  | 27.13124 | 26.99766 |
| 24.79452 | 24.33074 | 24.57542 | 24.58692 | 24.97596 | 25.09748 | 24.56384 | 25.06907 | 25.16806 |
| 25.63755 | 25.95615 | 24.95394 | 25.07725 | 26.65949 | 25.08942 | 23.56384 | 23.72858 | NaN      |
| NaN      | NaN      | NaN      | NaN      | NaN      | NaN      | 28.48232 | 28.509   | 28.16997 |
| 26.21882 | 25.98902 | 26.19835 | 26.47228 | 26.55069 | 26.03171 | 26.12139 | 26.07521 | 25.87408 |
| 25.88577 | 26.00196 | 25.72598 | 25.95615 | 25.82639 | 25.92252 | 25.04427 | 24.87173 | 25.28912 |
| 31.08005 | 31.07368 | 31.16639 | 29.88577 | 30.03486 | 30.00838 | 29.21466 | 29.23763 | 29.14346 |
| 25.11347 | 25.6971  | 25.54628 | 25.71816 | 25.65949 | 25.50749 | 25.9955  | 26.48308 | 25.89966 |
| 29.57542 | 29.66966 | 29.40933 | 28.87408 | 28.60045 | 28.7357  | 27.98685 | 27.92025 | 28.0296  |
| 26.61807 | 26.61807 | 27.11148 | 26.239   | 26.25169 | 26.37948 | 25.24989 | 25.71816 | 25.56384 |
| 26.09748 | 26.0874  | 26.03591 | 26.08942 | 25.91114 | 26.16423 | 26.50294 | 26.27142 | 26.35616 |
| 26.47537 | 26.89735 | 26.35616 | 26.30487 | 26.24445 | 26.34435 | 25.77203 | 25.64306 | 25.69975 |
| 29.63027 | 29.76288 | 29.74855 | 29.71784 | 29.64924 | 29.59156 | NaN      | 22.87267 | 19.17035 |
| 25.71293 | 26.29964 | 25.81176 | 26.54481 | 26.19648 | 26.21882 | 27.28912 | 26.95394 | 27.29789 |
| 27.56092 | 27.58978 | 27.52402 | 27.35783 | 27.51653 | 27.61807 | 27.35783 | 27.05051 | 27.34096 |
| 27.75175 | 28.09648 | 27.54628 | 27.49381 | 27.71947 | 27.90311 | 27.31527 | 27.38278 | 27.21697 |
| 26.78955 | 27.08132 | 26.89735 | 26.60399 | 26.48616 | 26.2856  | 26.4567  | 26.01691 | 26.31527 |
| 27.96499 | 28.01903 | 28.19835 | 28.14589 | 28.21697 | 28.12139 | 27.86821 | 28.02433 | 27.90311 |
| 34.19014 | 34.36984 | 34.36333 | 33.38278 | 33.31689 | 33.44579 | 32.3802  | 32.51559 | 32.33565 |
| NaN      | NaN      | 25.1946  | 25.01478 | 24.94949 | 24.96279 | NaN      | 24.28912 | 24.29614 |
| 28.02433 | 28.05569 | 27.9428  | 27.33245 | 27.60399 | 27.31527 | 28.34096 | 28.5389  | 28.04009 |
| 27.48616 | 27.11148 | 29.00303 | 28.0296  | 26.28736 | 28.12633 | 24.83364 | 24.64306 | 25.79452 |
| 26.85043 | 27.27142 | 26.81421 | 26.54481 | 26.65949 | 26.75175 | 26.239   | 26.00838 | 26.09547 |
| 28.57903 | 28.72923 | 28.87701 | 28.46295 | 28.41135 | 28.32389 | 28.81421 | 28.74535 | 28.87115 |
| 31.29242 | 31.09899 | 31.27586 | 31.64581 | 31.86452 | 31.86821 | 31.00169 | 31.22504 | 31.09899 |
| 27.94838 | 28.39509 | 28.0296  | 27.96499 | 27.83846 | 27.80193 | 27.72598 | 27.90885 | 27.92025 |
| 30.20769 | 30.13614 | 30.39305 | 30.42342 | 30.38278 | 30.54812 | 30.27586 | 30.06085 | 30.38278 |
| 25.87408 | 25.75939 | 26.4008  | 25.72338 | 26.43619 | 27.08132 | 25.02749 | 25.56674 | 24.78457 |
| 23.99335 | NaN      | NaN      | NaN      | NaN      | NaN      | 25.56674 | 25.10949 | 25.65676 |
| 28.01372 | 27.75812 | 28.19366 | 28.05051 | 28.00838 | 27.99226 | 27.61807 | 27.65267 | 27.78332 |
| 24.91342 | 25.43619 | 25.08537 | 25.33756 | 25.13712 | 25.11347 | 25.94056 | 25.84326 | 25.7543  |
| 26.09144 | 26.06702 | 26.11545 | 26.2021  | 26.19084 | 26.04843 | 26.04009 | 26.0296  | 25.96719 |
| 26.26785 | 26.71293 | 26.10749 | 26.85043 | 26.78955 | 26.64581 | 25.74663 | 25.35783 | 25.96939 |
| 26.9428  | 27.09144 | 26.83846 | 26.93157 | 27.14102 | 26.88577 | 26.82639 | 26.82639 | 26.75175 |
| 26.16615 | 25.24264 | 25.27142 | 24.59833 | 23.50446 | 24.48616 | 24.76951 | 24.14102 | 23.72858 |
| 25.48922 | 26.41054 | 26.19835 | 26.05051 | 26.01903 | 26.26607 | 24.46139 | 23.23169 | 24.02749 |
| 27.23535 | 27.63201 | 27.84446 | 27.24445 | 27.01903 | 26.99766 | 24.49228 | NaN      | NaN      |
| 26.97596 | 27.10149 | 27.13124 | 27.2803  | 27.24445 | 27.34942 | 26.81421 | 26.73892 | 26.78955 |
| 27.0296  | 26.44095 | 26.69975 | 26.81421 | 26.57542 | 26.58978 | 25.22803 | 24.95837 | 24.36453 |
| 25.62087 | 25.57831 | 25.58978 | 23.87643 | NaN      | NaN      | 27.04009 | 26.99766 | 27.20769 |
| 27.78332 | 27.87408 | 27.82031 | 27.75175 | 27.99766 | 27.73892 | 27.34096 | 27.44727 | 27.39917 |
| 27.55362 | 27.33245 | 27.58262 | 26.88577 | 26.71293 | 26.71293 | 24.98033 | 24.10949 | 25.60399 |
| 27.07112 | 27.39917 | 27.21697 | 27.27142 | 26.88577 | 26.81421 | 25.89273 | 26.58978 | 26.44884 |
| 24.2535  | 23.07561 | 23.74919 | 23.96719 | 25.08537 | 24.00196 | 26.13124 | 26.07316 | 25.81909 |
| 25.82396 | 25.58692 | 25.76699 | 25.22803 | 25.03171 | 25.24989 | 24.56964 | 24.14102 | 24.64856 |
| 26.57254 | 26.83846 | 25.54922 | 26.63201 | 26.09949 | 26.18518 | 27.30661 | 27.06085 | 27.2535  |
| 26.78955 | 26.49838 | 26.98685 | 26.37617 | 26.73892 | 26.63201 | 26.39264 | 26.46762 | 26.317   |
| 27.30661 | 27.1795  | 27.28912 | 27.5969  | 27.41538 | 27.48616 | 26.97596 | 27.08132 | 26.96499 |
| NaN      | NaN      | NaN      | 25.42982 | 25.13712 | 24.99766 | 26.13516 | 26.34942 | 26.20955 |
| 26.04427 | 26.08335 | 26.16423 | 26.9428  | 27.14102 | 27.11148 | 27.11148 | 27.06085 | 27.29789 |
| 26.04009 | 25.04009 | 25.04843 | 24.83364 | 24.47383 | 25.43936 | 24.64856 | 23.07235 | 24.239   |
| 25.36119 | 25.24627 | 24.72338 | 25.52552 | 25.38772 | 24.80931 | 24.49838 | 25.35448 | 24.79452 |
| 27.16997 | 26.83846 | 26.93157 | 26.73892 | 26.60399 | 26.87408 | 27.45513 | 27.11148 | 27.43141 |
| 24.66492 | 25.59263 | 26.58978 | 25.79452 | 26.4567  | 27.08132 | 27.00838 | 26.93157 | 26.58978 |
| 27.05051 | 26.43141 | 27.391   | 28.04531 | 27.19835 | 27.26249 | 23.05755 | 22.47259 | NaN      |
| 24.2021  | 24.97596 | 23.77957 | 24.33756 | 24.34435 | 24.1488  | 25.30661 | 26.00838 | 25.317   |
| 24.72858 | 24.94503 | 24.5285  | 25.06907 | 24.88577 | 24.71293 | 26.09547 | 25.55215 | 26.00624 |
| NaN      | NaN      | NaN      | 24.06907 | 24.16423 | 23.79947 | 24.6811  | 24.48001 | 24.6811  |
| 28.01903 | 28.43936 | 28.15557 | 28.02433 | 28.10649 | 27.97596 | 27.63201 | 27.63201 | 27.3662  |
| NaN      | NaN      | NaN      | NaN      | NaN      | NaN      | 28.53148 | 28.30661 | 28.52028 |
| 24.53445 | 24.47383 | 24.50446 | 24.29614 | 23.07235 | 24.58692 | 24.55215 | 24.26785 | 23.78955 |
| 26.60399 | 25.90196 | 26.80193 | 27.60399 | 27.42342 | 27.47073 | 26.82639 | 26.47228 | 26.75175 |
| 26.60399 | 26.52999 | 26.49228 | 26.24445 | 26.06085 | 25.95172 | 25.7543  | 25.87408 | 25.47383 |
| NaN      | NaN      | NaN      | NaN      | 24.01052 | NaN      | 25.16423 | 25.18707 | 25.74919 |
| 25.96499 | 26.27498 | 26.2803  | 25.87173 | 25.76192 | 25.7024  | 25.34435 | 26.36119 | 26.02538 |
| 26.03591 | 25.96058 | 25.7543  | 24.42342 | 24.74919 | 25.04427 | NaN      | NaN      | NaN      |
| 29.16997 | 29.09144 | 29.34731 | 28.61456 | 28.74855 | 28.89446 | 29.4919  | 29.47653 | 29.57001 |
| 26.52999 | 26.86231 | 26.11148 | 26.87408 | 27.10149 | 26.99766 | 25.54922 | 25.89273 | 25.85281 |
| 21.85377 | NaN      | 21.21252 | 24.5285  | 23.391   | 23.87643 | 27.26249 | 26.72598 | 26.77706 |
| 25.53742 | 25.91798 | 24.92252 | 25.317   | 26.04009 | 25.59548 | NaN      | NaN      | NaN      |
| 27.77706 | 27.65949 | 27.3662  | 26.98685 | 27.21697 | 27.12139 | 26.63201 | 26.48616 | 26.43141 |
| 27.3662  | 27.77706 | 27.31527 | 27.58262 | 27.27142 | 27.391   | 28.01372 | 27.75812 | 27.61105 |
| 27.0296  | 27.2803  | 27.20769 | 26.69975 | 26.69975 | 25.62366 | 25.76192 | 25.14102 | 25.44569 |
| 26.11942 | 26.28912 | 26.28736 | 25.89735 | 25.71555 | 26.08537 | 25.94503 | 25.98685 | 26.21697 |
| 28.53148 | 28.58978 | 28.5389  | 28.73892 | 28.60045 | 28.64238 | 27.83244 | 27.89735 | 27.86821 |
| 25.55508 | 25.61246 | 25.98685 | 25.78207 | 25.8044  | 25.67303 | NaN      | 23.417   | 23.86703 |
| 25.66221 | 26.04009 | 25.77455 | 26.10749 | 26.16806 | 26.22435 | 26.16423 | 25.57542 | 25.7415  |
| 27.07112 | 26.68646 | 26.67303 | 26.02749 | 26.17188 | 25.57542 | 24.47383 | 24.54628 | 24.17188 |
| 27.30661 | 27.31527 | 27.35783 | 27.42342 | 27.61105 | 27.54628 | 27.33245 | 27.30661 | 27.21697 |
| 27.38278 | 26.78955 | 27.2803  | 27.78955 | 27.06085 | 27.30661 | 27.29789 | 27.10149 | 27.5389  |
| 25.96939 | 26.04843 | 26.37285 | 26.4008  | 25.90656 | 26.29439 | 25.41054 | 26.038   | 25.54922 |
| 23.98468 | 24.51051 | 24.47383 | 25.19084 | 24.93607 | 24.57542 | 24.82396 | 25.01052 | 24.94056 |

|          |          |          |          |          |          |          |          |          |
|----------|----------|----------|----------|----------|----------|----------|----------|----------|
| 27.86231 | 26.90885 | 28.0296  | 28.73247 | 28.41538 | 28.00303 | 28.53148 | 29.08385 | 28.84745 |
| 25.6513  | 25.08537 | 25.01478 | 25.64031 | 25.60964 | 25.58405 | 26.01691 | 26.28383 | 26.23717 |
| 28.76762 | 28.41135 | 28.57181 | 28.85341 | 28.65267 | 28.86231 | 29.11396 | 28.95394 | 29.30661 |
| 25.76192 | 26.06291 | 25.85043 | 25.46139 | 25.65949 | 25.77455 | 26.05879 | 26.01903 | 25.8044  |
| 24.97596 | 25.77455 | 25.81176 | 25.62087 | 25.39428 | 25.61526 | 25.77706 | 25.82639 | 25.58692 |
| 27.97049 | 28.14102 | 27.91456 | 27.71947 | 27.66628 | 27.75175 | 27.2535  | 26.75175 | 27.12139 |
| 25.93607 | 25.53742 | 25.82153 | 25.68646 | 25.4008  | 25.37451 | 26.34773 | 25.81665 | 26.12534 |
| 26.50749 | 26.27142 | 26.75175 | 25.28912 | 25.74407 | 25.92252 | 26.14297 | 25.44253 | 25.97158 |
| 26.52253 | 27.11148 | 27.58262 | 25.86938 | 24.28912 | 25.70767 | 28.12139 | 29.96774 | 29.104   |
| 27.84446 | 27.73892 | 27.79576 | 27.73892 | 27.78332 | 28.00838 | 26.82639 | 26.86231 | 26.9428  |
| 26.44569 | 26.22251 | 26.68646 | 26.85043 | 26.56238 | 26.75175 | 26.58978 | 26.75175 | 26.54333 |
| 24.79947 | 24.67573 | 24.92705 | 24.89041 | 24.95394 | 24.62087 | 24.91798 | 25.2856  | 25.31008 |
| 26.68646 | 27.05051 | 27.4073  | 27.08132 | 27.13124 | 26.73892 | 27.07112 | 27.95394 | 28.09144 |
| 26.86231 | 25.7024  | 26.88577 | 27.08132 | 26.22251 | 26.88577 | 19.83923 | 19.88911 | 22.84995 |
| 25.48616 | 25.63201 | 25.09346 | 25.13712 | 25.03171 | 25.04009 | 24.83364 | NaN      | 24.90885 |
| 28.96224 | 29.17474 | 28.95947 | 28.46684 | 28.54628 | 28.47073 | 27.47073 | 27.86821 | 27.97049 |
| 25.72598 | 25.78955 | 25.78955 | 25.72338 | 25.70767 | 25.80686 | 26.19272 | 26.19272 | 26.09346 |
| 24.97596 | 24.57542 | 25.08132 | 25.76446 | 25.65403 | 26.20396 | 24.94949 | 25.05258 | 25.23535 |
| 25.1795  | 25.48922 | 25.03171 | 25.33756 | 25.31008 | 25.30313 | 25.7024  | 25.37451 | 25.98033 |
| 24.55215 | 24.98033 | 24.49838 | 25.6971  | 25.1946  | 25.46139 | 24.55801 | 25.22435 | 24.51051 |
| NaN      | NaN      | 24.05258 | 23.93157 | 24.21697 | 24.37782 | 24.28912 | 24.43619 | 24.82881 |
| 25.55508 | 25.60399 | 25.64856 | 26.41054 | 26.73892 | 26.21512 | 26.75175 | 26.65949 | 26.58978 |
| 26.1795  | 26.47846 | 26.55508 | 26.4008  | 25.80686 | 26.53594 | 27.15074 | 27.05051 | 27.06085 |
| 25.51653 | 25.29614 | 25.41054 | 25.16423 | 25.20955 | 25.59833 | 25.82396 | 25.96719 | 25.7103  |
| 28.5969  | 28.54995 | 28.70965 | 29.01372 | 28.88285 | 28.98685 | 28.60399 | 28.38278 | 28.58262 |
| 27.11148 | 27.08132 | 26.61807 | 27.10149 | 26.81421 | 27.05051 | 26.06702 | 26.05051 | 26.23352 |
| 25.42021 | 26.08942 | 25.51953 | 25.94949 | 26.23352 | 26.13124 | 26.09144 | 26.11744 | 26.06907 |
| 26.58978 | 26.86231 | 27.60399 | 26.90885 | 27.07112 | 26.67303 | 24.98033 | 26.18139 | 26.30661 |
| 24.23169 | 24.61526 | 24.49838 | 24.79947 | 24.67034 | 24.239   | 23.64306 | 24.71293 | NaN      |
| 26.53148 | 26.85043 | 26.71293 | 26.71293 | 26.16423 | 26.20955 | 26.9428  | 27.08132 | 27.07112 |
| 25.2535  | 26.90885 | 27.06085 | 27.2803  | 27.53148 | 27.48616 | 22.46762 | 22.50446 | NaN      |
| 25.79947 | 26.03381 | 25.94056 | 26.26607 | 25.77455 | 25.16423 | 25.36786 | 25.33756 | 25.59833 |
| 28.57542 | 28.69975 | 28.55728 | 28.73892 | 28.47846 | 28.54995 | 27.3662  | 27.3662  | 27.61105 |
| 24.51653 | 24.78457 | 24.91798 | 24.77957 | 25.11744 | 25.2571  | 26.50597 | 25.99118 | 26.48001 |
| 26.40243 | 26.23352 | 26.21327 | 26.60399 | 25.92025 | 26.04427 | 24.90426 | 25.58118 | 24.76446 |
| 27.16039 | 27.12139 | 27.01903 | 26.83846 | 27.00838 | 26.87408 | 24.69179 | 25.06085 | 25.44884 |
| 25.29614 | 23.31008 | 24.89504 | 25.6513  | 25.33415 | 25.59263 | NaN      | 23.6971  | NaN      |
| 25.23169 | 22.13006 | 24.77957 | 24.98902 | 25.01478 | 23.97596 | 23.91342 | 24.59833 | 25.417   |
| 24.04427 | 24.37782 | 23.79947 | 24.67573 | 24.34435 | 24.10949 | 25.7103  | 25.87173 | 25.18329 |
| 24.51051 | 26.01478 | 24.11744 | 25.03591 | 25.79203 | 25.54038 | 25.78457 | 25.47073 | 26.16615 |
| 23.36453 | 24.08537 | NaN      | 24.27498 | 24.18707 | 24.73376 | 25.58692 | 25.02327 | 24.96719 |
| 29.73731 | 29.72923 | 29.77706 | 29.47846 | 29.29789 | 29.10899 | 24.14102 | 23.6971  | 22.01903 |
| 26.4186  | 24.87643 | 27.10149 | 26.03381 | 25.77706 | NaN      | 26.82639 | 28.57903 | NaN      |
| 24.42982 | 23.89504 | 24.72858 | 24.1946  | 23.51653 | 25.15653 | 22.80341 | 22.3073  | 22.1795  |
| 26.41054 | 25.77455 | 25.81665 | 25.96939 | 26.08537 | 25.62923 | 22.6971  | NaN      | NaN      |
| 26.06291 | 26.28383 | 26.03381 | 25.84566 | 26.038   | 26.08942 | 25.76699 | 25.5285  | 25.38113 |
| 27.93157 | 28.06085 | 27.83846 | 27.58978 | 27.71293 | 27.71293 | 27.92025 | 27.77706 | 27.87994 |
| 27.47073 | 27.47846 | 27.85043 | 27.39917 | 27.63201 | 27.71947 | 27.77706 | 27.34096 | 27.4073  |
| 25.31008 | 26.78955 | 26.20955 | 26.64581 | 24.2021  | 26.19272 | 26.99766 | 26.86231 | 27.07112 |
| 27.65949 | 26.68646 | 27.18896 | 27.26249 | 26.68646 | 26.47846 | 27.56819 | 27.27142 | 27.3662  |
| NaN      | NaN      | NaN      | NaN      | NaN      | NaN      | 25.92025 | 25.79452 | 25.71555 |
| NaN      | 23.32389 | 24.75939 | 23.73892 | NaN      | NaN      | 26.19272 | 26.86231 | 26.57542 |
| 23.97596 | 24.14102 | 24.35783 | 23.92252 | 23.93157 | 24.41054 | 23.66492 | 24.06085 | 24.44253 |
| NaN      | NaN      | NaN      | NaN      | NaN      | NaN      | 27.57542 | 27.46295 | 27.51653 |
| 25.55508 | 25.72858 | 25.1332  | 25.23535 | 24.97596 | 25.1946  | 25.90885 | 25.78207 | 25.68913 |
| 26.06907 | 26.45199 | 25.94726 | 25.86938 | 25.92252 | 25.79452 | 25.37119 | 25.41377 | 25.58692 |
| 26.47228 | 26.72598 | 26.30487 | 26.71293 | 26.68646 | 26.55069 | 26.04843 | 25.76699 | 26.13124 |
| NaN      | 24.58118 | NaN      | 25.1795  | 24.70767 | NaN      | 24.55801 | 25.9157  | 25.76446 |
| 30.65438 | 30.59335 | 30.64581 | 30.06085 | 30.07368 | 30.06085 | 30.38278 | 30.52962 | 30.41337 |
| 30.69644 | 30.78488 | 31.01505 | 30.58441 | 30.7692  | 30.41337 | 30.21928 | 30.4334  | 30.35153 |
| 26.90885 | 26.81421 | 26.80193 | 26.40243 | 26.60399 | 26.60399 | 27.61105 | 27.85043 | 27.55362 |
| 26.92025 | 26.92025 | 26.77706 | 27.06085 | 26.98685 | 26.61807 | 26.14297 | 26.391   | 26.82639 |
| 24.58692 | 24.67573 | 24.51051 | 25.26785 | 25.06085 | 25.23169 | 25.2535  | 24.81909 | 25.40406 |
| 29.29132 | 29.41538 | 29.37036 | 29.36828 | 29.33884 | 29.25575 | 29.30226 | 29.15074 | 29.33245 |
| 27.76446 | 27.84446 | 27.84446 | 29.28251 | 28.54628 | 28.63201 | 27.57542 | 27.65949 | 28.258   |
| 26.88577 | 26.96499 | 26.68646 | 26.07725 | 26.68646 | 25.62923 | 26.50749 | 26.28912 | 26.13712 |
| 26.75175 | 26.38607 | 26.58978 | 26.65949 | 26.63201 | 26.58978 | 27.28912 | 27.76446 | 27.32389 |
| 24.97158 | 25.31354 | 25.23535 | 24.86231 | 24.83846 | 25.06497 | 25.42662 | 25.46451 | 25.13712 |
| 27.75175 | 27.58978 | 28.51653 | 27.44727 | 27.85638 | 27.87408 | 27.09144 | 26.95394 | 27.53148 |
| 25.77203 | 25.34773 | 25.39428 | 25.87877 | 25.65949 | 25.56092 | 25.27853 | 24.91342 | 25.2856  |
| 26.33245 | 26.4346  | 26.24627 | 26.50749 | 26.64581 | 26.5389  | 26.509   | 26.13124 | 26.44095 |
| NaN      | NaN      | NaN      | 25.09748 | NaN      | 25.32732 | 25.83123 | 25.54038 | 25.87877 |
| 26.05672 | 25.97596 | 25.62923 | 25.32045 | 25.6811  | 25.90196 | 25.97158 | 26.11347 | 25.8044  |
| 25.73117 | 26.04009 | 25.95837 | 25.71816 | 25.83123 | 25.78955 | 25.51051 | 25.30313 | 25.2571  |
| 25.44569 | 25.26785 | 25.33756 | 24.76446 | 25.19084 | 25.1946  | NaN      | 24.26069 | NaN      |
| NaN      | 23.66492 | NaN      | 24.73376 | 24.55215 | 24.30313 | 25.03591 | 25.51051 | 25.14492 |
| 25.12928 | 24.94503 | 24.90885 | 25.61246 | 25.52552 | 25.53148 | 24.68646 | 25.05258 | 24.5285  |
| 30.04791 | 30.17236 | 30.04791 | 29.96774 | 30.02168 | 30.24218 | 29.89446 | 29.77077 | 29.98142 |
| 26.24082 | 26.45513 | 26.21512 | 25.82639 | 25.97158 | 26.18329 | 25.89273 | 25.7543  | 25.92252 |
| 24.51051 | 25.46762 | 24.97596 | 25.03591 | 25.16806 | 24.68646 | 25.58405 | 26.06702 | 25.62087 |
| 25.89966 | 26.38936 | 25.86703 | 26.17188 | 26.29263 | 25.73376 | 25.99118 | 25.85757 | 25.78706 |
| 28.2803  | 28.41941 | 28.51653 | 28.58978 | 28.51277 | 28.10149 | 27.22619 | 27.23535 | 27.30661 |
| 26.9428  | 26.65949 | 26.92025 | 26.29964 | 26.82639 | 26.9428  | 27.79576 | 27.81421 | 27.92592 |
| 26.97596 | 27.28912 | 26.81421 | 26.73892 | 26.64581 | 26.55947 | 26.80193 | 26.35279 | 26.24082 |
| 29.41337 | 29.32389 | 29.51653 | 29.27364 | 29.4649  | 29.19131 | 28.24445 | 28.04531 | 28.30226 |
| 26.92025 | 26.96499 | 26.64581 | 26.37617 | 26.26249 | 26.46918 | 26.17188 | 26.20955 | 26.0041  |
| 25.46139 | 26.17188 | 25.46139 | 26.85043 | 26.18707 | 27.27142 | 26.63201 | 26.93157 | 27.1795  |
| 25.04009 | 24.62645 | 25.19084 | 26.20583 | 26.30487 | 26.16997 | 26.04635 | 27.13124 | 26.46139 |

|          |          |          |          |          |          |          |          |          |
|----------|----------|----------|----------|----------|----------|----------|----------|----------|
| 28.3452  | 28.70636 | 28.49762 | 29.11148 | 28.80501 | 28.74214 | 27.71947 | 27.61807 | 27.75175 |
| 26.03591 | 25.70767 | 26.24989 | 25.90656 | 25.82153 | 25.35448 | 26.1332  | 25.38443 | 26.07725 |
| 25.6811  | 25.7103  | 25.32389 | 25.317   | 25.23169 | 25.44253 | 25.39754 | 25.4073  | 25.50749 |
| 28.03486 | 26.57542 | 27.71293 | 28.45513 | 28.46295 | 28.43539 | 28.74535 | 28.55362 | 28.70306 |
| 24.8044  | 24.6971  | 24.91798 | 23.87643 | 23.50446 | 23.1946  | 24.20955 | 24.42982 | 25.64581 |
| 26.21327 | 26.29789 | 26.1795  | 26.34773 | 26.55362 | 26.53297 | 24.67034 | 24.41054 | 25.1795  |
| NaN      | 24.98902 | 24.1488  | 23.88577 | NaN      | 23.92252 | 25.36119 | 25.27853 | 25.56964 |
| 25.78207 | 26.05258 | 26.0041  | 25.86703 | 25.83605 | 25.91114 | 25.7415  | 25.94949 | 25.88344 |
| 24.82396 | NaN      | 23.23023 | NaN      | 25.11347 | 25.24264 | NaN      | 26.038   | 24.82396 |
| 25.70504 | 25.80686 | 25.46762 | 25.74407 | 26.11347 | 25.79947 | 25.77706 | 26.55362 | 25.85281 |
| 25.15653 | 25.26069 | 24.97596 | 25.39754 | 25.2535  | 27.69312 | 25.04843 | 24.73892 | 25.01052 |
| 23.75939 | 24.15653 | 23.56384 | 23.91342 | 24.01052 | 24.21697 | 25.84086 | 26.04218 | 25.63478 |
| 26.36453 | 26.317   | 25.87408 | 27.21697 | 26.72598 | 26.71293 | 26.83846 | 27.09144 | 27.1795  |
| 23.80931 | 23.68646 | 23.50446 | 23.67573 | 24.03591 | 23.21104 | 25.22435 | 25.09346 | 24.5285  |
| NaN      | NaN      | NaN      | NaN      | NaN      | NaN      | 25.91114 | 26.16039 | 25.87408 |
| 24.63755 | 25.41054 | 25.35111 | 25.26428 | 24.87643 | 24.86231 | 25.04427 | 24.8811  | 25.18707 |
| 26.57254 | 26.65949 | 26.19648 | 26.64581 | 26.38278 | 26.29789 | 25.59548 | 25.53148 | 25.21327 |
| 25.62645 | 26.28912 | 26.13712 | 25.53445 | 25.28912 | 24.56384 | NaN      | NaN      | NaN      |
| 25.14492 | 25.32389 | 24.93157 | 24.96719 | 25.90426 | 25.21327 | 23.73892 | NaN      | NaN      |
| 24.89504 | NaN      | 24.60964 | 24.83846 | 24.93607 | 27.16039 | 27.20769 | 26.77706 | 26.93157 |
| 23.07887 | 24.06907 | 24.1946  | 24.317   | 24.35111 | 23.79947 | 25.83605 | 24.55801 | 25.84086 |
| 25.19084 | NaN      | NaN      | 24.45513 | 24.1946  | 24.91798 | 24.91798 | 25.1757  | 24.82396 |
| 26.16231 | 25.94056 | 25.99981 | 25.68913 | 26.44727 | 26.509   | 26.49534 | 26.39428 | 26.39264 |
| 26.61807 | 26.45042 | 26.32045 | 27.44727 | 27.1795  | 27.4073  | 26.49381 | 26.47228 | 26.31354 |
| 26.87408 | 26.83846 | 26.90885 | 26.73892 | 26.96499 | 26.63201 | 26.63201 | 26.75175 | 27.22619 |
| 26.97596 | 27.08132 | 26.98685 | 27.07112 | 27.06085 | 27.09144 | 28.03486 | 27.73247 | 28.06085 |
| 26.49076 | 26.88577 | 26.37782 | 26.41377 | 26.09144 | 26.11744 | 26.63201 | 26.48308 | 26.68646 |
| 25.93157 | 26.01052 | 25.34773 | 26.38772 | 26.05051 | 26.3256  | 26.08537 | 26.23717 | 26.04218 |
| 27.58978 | 28.1795  | 28.12633 | 27.68646 | 27.68646 | 27.71293 | 25.28912 | 24.67573 | 25.64306 |
| 25.31008 | 25.30313 | 25.14492 | 25.27498 | 25.61807 | 25.12534 | 25.67573 | 25.80686 | 25.43301 |
| 27.19835 | 27.77077 | 27.00838 | 27.56819 | 27.42342 | 27.43141 | 27.2803  | 27.07112 | 27.00838 |
| 26.1035  | 25.42982 | 25.2535  | 25.43936 | 26.02327 | 26.23352 | 25.98685 | 25.75939 | 25.64581 |
| 25.12534 | 25.239   | 25.47383 | 25.45199 | 25.42662 | 25.78706 | 24.96279 | 25.13712 | 25.21697 |
| 26.80193 | 27.16039 | 26.55655 | 26.58978 | 26.56674 | 26.55069 | 26.35951 | 26.61807 | 26.37451 |
| 25.20955 | 23.91342 | 25.53148 | 23.59833 | 24.417   | 24.01052 | 25.59548 | 25.24989 | 25.1055  |
| 27.07112 | 27.41538 | 27.26249 | 27.43141 | 27.44727 | 27.55362 | 27.56819 | 27.56092 | 27.58978 |
| 30.40324 | 30.55728 | 30.47267 | 30.70471 | 30.60222 | 30.69644 | 30.61105 | 30.41337 | 30.46295 |
| 28.39917 | 28.23535 | 28.67976 | 27.20769 | 27.1795  | 26.34435 | 24.62087 | NaN      | 25.52253 |
| 28.30226 | 27.89735 | 28.16519 | 29.0296  | 28.43539 | 28.56456 | 28.52028 | 28.04531 | 28.16997 |
| NaN      | 23.66492 | 23.37782 | 22.69073 | 22.11108 | 23.23169 | NaN      | NaN      | 24.94503 |
| 26.92025 | 26.69975 | 27.32389 | NaN      | 26.92025 | 25.32732 | 26.63201 | 26.24989 | 26.05258 |
| 23.81909 | 24.20955 | 23.92252 | 24.55215 | 24.59263 | 24.78457 | 24.50446 | 24.31008 | 24.42982 |
| 26.57254 | 26.76446 | 26.77706 | 26.81421 | 26.60399 | 26.55362 | 26.05051 | 26.44884 | 26.03591 |
| 26.40892 | 27.47073 | 26.56674 | 25.99981 | 26.05672 | 26.12337 | 26.50446 | 26.53445 | 26.49686 |
| 25.79203 | 26.18518 | 25.85757 | 26.04427 | 26.20955 | 26.46139 | 25.58692 | 25.38113 | 25.06907 |
| 25.52552 | 25.24627 | 25.2571  | 26.90885 | 26.57109 | 26.64581 | 27.42342 | 27.29789 | 27.62506 |
| 27.82031 | 28.06599 | 27.91456 | 27.79576 | 27.76446 | 27.69312 | NaN      | NaN      | NaN      |
| 26.35279 | 26.72598 | 26.10749 | 26.21512 | 26.31354 | 26.29439 | 25.92705 | 26.15074 | 25.88344 |
| 28.10149 | 27.69975 | 28.11644 | 28.44332 | 28.49762 | 28.55728 | 28.16997 | 28.13614 | 28.15557 |
| 26.50294 | 26.04218 | 25.60964 | 26.61807 | 26.43778 | 26.38936 | 25.88577 | 26.72598 | 26.239   |
| 26.07112 | 23.04926 | 26.37285 | 25.97378 | 25.64031 | 26.04218 | NaN      | 25.15653 | 25.79203 |
| 27.61105 | 27.07112 | 27.28912 | 27.86821 | 27.67303 | 27.69975 | 27.04009 | 26.9428  | 26.65949 |
| 23.88577 | 24.26785 | 23.42982 | 25.04009 | 25.21697 | 24.39754 | 22.16116 | 25.10949 | NaN      |
| 25.48922 | 25.89966 | 25.8044  | 24.66492 | 25.07316 | 24.74919 | 25.79452 | 25.41054 | 25.49228 |
| 24.53445 | 24.391   | 24.44253 | 24.54038 | 24.51653 | 24.417   | 25.7415  | 26.41377 | 25.89504 |
| 25.19084 | 24.29614 | NaN      | NaN      | 24.82396 | NaN      | 25.51051 | 25.7415  | 25.93157 |
| 25.95394 | 26.10949 | 25.94726 | 26.51953 | 26.20769 | 25.89504 | 26.83846 | 26.4999  | 26.49381 |
| 25.24264 | 23.71816 | 25.92931 | 26.69975 | 25.6971  | 26.58978 | 22.97596 | NaN      | 23.89504 |
| 24.09346 | NaN      | 24.43619 | 24.01052 | 24.04427 | 23.91342 | 24.06907 | 24.36453 | 24.239   |
| 24.84326 | 25.17188 | 24.67573 | 24.62645 | 24.42342 | 23.90426 | 25.48001 | 25.60964 | 25.44569 |
| 25.27498 | 24.239   | 25.38443 | 25.63201 | 25.40406 | 25.61807 | 24.79452 | 25.18329 | 24.54628 |
| 25.9955  | 26.37948 | 25.98033 | 25.54038 | 25.38113 | 25.82153 | NaN      | NaN      | NaN      |
| 26.92025 | 27.0296  | 26.87408 | 26.93157 | 26.68646 | 26.64581 | 26.37451 | 26.01478 | 25.84805 |
| 27.76446 | 27.83846 | 27.85043 | 27.77706 | 27.82031 | 27.5969  | 27.54628 | 27.66628 | 27.85043 |
| NaN      | NaN      | 24.84805 | NaN      | 24.01052 | 24.40406 | 24.59833 | 25.5046  | 25.2571  |
| 27.04009 | 27.07112 | 27.11148 | 27.4073  | 27.18896 | 27.08132 | 27.0296  | 26.80193 | 26.83846 |
| 26.48308 | 26.58978 | 26.4346  | 26.97596 | 26.95394 | 26.89735 | 26.2732  | 26.17379 | 26.56384 |
| NaN      | NaN      | 22.93517 | 23.51653 | 23.42982 | 23.77957 | 25.1757  | 24.59263 | 24.8044  |
| 25.59833 | 25.83605 | 25.84086 | 25.23535 | 25.36119 | 25.34773 | 25.85043 | 26.0874  | 25.61807 |
| 25.2856  | 25.38113 | 25.2021  | 26.13712 | 26.07928 | 25.95394 | 25.34773 | 25.78706 | 25.62923 |
| 23.26785 | NaN      | 23.86703 | 23.35111 | 23.01052 | 23.94056 | 24.09346 | 24.16423 | 23.60964 |
| 25.06085 | 24.77957 | 25.01903 | 25.27853 | 25.06907 | 25.08132 | 25.43301 | 25.15267 | 25.42662 |
| 26.65949 | 26.76446 | 26.82639 | 26.39428 | 26.41377 | 26.48155 | 27.10149 | 27.19835 | 27.01903 |
| 27.83244 | 27.55362 | 28.0296  | 27.45513 | 27.22619 | 27.48616 | 25.48616 | 25.16806 | 26.81421 |
| 24.391   | 24.26785 | 24.6971  | 24.2021  | 24.68646 | 24.83846 | 25.07316 | 24.81909 | 25.06907 |
| 28.26696 | 28.32817 | 28.3452  | 28.21697 | 28.16519 | 28.11644 | 27.11148 | 27.28912 | 27.1795  |
| 27.20769 | 26.96499 | 26.78955 | 26.78955 | 26.67303 | 25.87643 | 26.97596 | 26.9428  | 26.61807 |
| 24.78457 | 25.09346 | 24.76951 | 24.59263 | 24.58692 | 25.37451 | 24.98902 | 24.80931 | 25.317   |
| 26.01265 | 26.48155 | 25.93382 | 26.04635 | 25.72078 | 26.09748 | 26.42342 | 26.22435 | 26.417   |
| 25.1757  | 25.34096 | 24.85281 | 25.2535  | 25.35448 | 25.00624 | 25.1946  | 25.26785 | 25.30313 |
| NaN      | NaN      | 23.48001 | 23.98468 | NaN      | NaN      | 24.33074 | 24.28912 | 24.36453 |
| 25.31354 | 25.80193 | 25.30313 | 25.26785 | 25.49838 | 25.09346 | 24.92252 | 24.94056 | 25.06497 |
| 25.91798 | 26.35951 | 26.22803 | 25.71293 | 26.22435 | 26.14297 | 26.67303 | 27.06085 | 26.51352 |
| 23.50446 | NaN      | 23.55215 | 23.72858 | 23.42982 | 24.1332  | 24.5285  | 24.89041 | 24.62087 |
| 26.20955 | 26.26069 | 26.64581 | 25.77957 | 25.04843 | 25.76699 | 25.35783 | 24.96279 | 25.54038 |
| 23.97596 | 24.26069 | 23.86703 | 23.76951 | 23.54628 | 23.93157 | NaN      | 23.24771 | NaN      |
| 25.5285  | 27.89157 | 25.7543  | 25.70767 | 25.24989 | 25.24989 | 24.95837 | 24.54038 | 25.01052 |
| 25.13712 | 25.317   | 24.95837 | 25.60682 | 25.62923 | 25.56384 | 25.16806 | 25.42021 | 25.1757  |

|          |          |          |          |          |          |          |          |          |
|----------|----------|----------|----------|----------|----------|----------|----------|----------|
| 24.48616 | 26.33245 | 24.81421 | 26.37948 | 26.00624 | 25.79452 | 25.62087 | 25.93157 | 26.33245 |
| 24.27498 | 24.2535  | 23.88577 | 24.04427 | 24.28912 | 23.65403 | NaN      | NaN      | NaN      |
| 24.42982 | NaN      | 24.11744 | 24.03591 | 24.5285  | 24.56964 | 25.03591 | 25.79452 | 24.51051 |
| 23.65403 | 23.84805 | 23.65403 | 23.88577 | 23.67573 | 24.07725 | 24.5285  | 24.18707 | 24.35782 |
| 28.74535 | 28.91456 | 28.75494 | 28.52402 | 28.41941 | 28.41538 | 28.34942 | 28.32389 | 28.35363 |
| 23.44253 | 24.18707 | 23.94056 | 24.08537 | 24.1332  | 24.1488  | 24.2535  | NaN      | 23.76951 |
| 28.06599 | 27.97049 | 28.02433 | 28.13124 | 28.16997 | 28.07112 | 28.83244 | 28.69312 | 28.81726 |
| NaN      | 24.58692 | NaN      | 24.35783 | 23.81909 | 23.81909 | NaN      | 24.46139 | 24.35783 |
| NaN      | NaN      | 24.65949 | 24.86703 | 24.79947 | 24.95837 | 25.09346 | 24.60964 | 24.95394 |
| 25.24627 | 25.97158 | 25.65949 | 25.53148 | 25.82881 | 25.92479 | 25.86231 | 25.89504 | 25.81421 |
| NaN      | 24.16423 | NaN      | NaN      | 24.1946  | NaN      | 25.26428 | 25.03171 | 24.85757 |
| NaN      | NaN      | NaN      | NaN      | NaN      | NaN      | NaN      | 24.43619 | 24.18707 |
| 26.2021  | 25.19835 | 25.11744 | 24.71293 | 24.79947 | 24.84805 | 24.51051 | 24.37119 | 24.73376 |
| 24.75939 | 24.58692 | 24.66492 | 25.42982 | 25.08537 | 25.00624 | 24.5285  | NaN      | 24.77957 |
| NaN      | NaN      | NaN      | NaN      | NaN      | NaN      | 24.03591 | 24.35111 | 23.96719 |
| 25.26785 | 25.97158 | 25.65949 | 25.67034 | 24.97158 | 26.20583 | 25.08537 | 25.11347 | 25.29263 |
| NaN      | NaN      | NaN      | 23.6971  | NaN      | NaN      | 24.22435 | 25.04009 | 23.83846 |
| 27.5389  | 27.29789 | 27.58262 | 27.68646 | 27.49381 | 27.62506 | 27.65949 | 27.67303 | 28.14102 |
| 25.04427 | 24.391   | 24.95394 | 24.50446 | 24.06907 | 24.15653 | 25.54038 | 24.69179 | 25.00624 |
| 24.15653 | 24.45513 | 24.86703 | 24.33074 | 24.33074 | 24.42982 | 23.80931 | 24.48001 | 24.60964 |
| 27.97049 | 28.06085 | 27.78955 | 27.49381 | 27.61807 | 27.79576 | 27.98142 | 28.16039 | 27.81421 |
| NaN      | NaN      | NaN      | NaN      | NaN      | NaN      | 26.31181 | 26.317   | 26.14492 |
| 25.40406 | 25.88577 | 25.37451 | 25.19835 | 24.98033 | 25.66492 | 24.90885 | 24.74919 | 24.99335 |
| 27.78332 | 28.05051 | 27.72598 | 27.48616 | 27.24445 | 27.45513 | 27.82031 | 27.66628 | 27.73247 |
| 24.48001 | 24.09346 | 24.10949 | 25.16039 | 24.65949 | 25.72598 | NaN      | NaN      | NaN      |
| 25.28912 | 25.41054 | 24.97158 | 25.41377 | 24.27498 | 25.31008 | 26.21697 | 26.07112 | 26.00624 |
| 22.69498 | 22.58463 | NaN      | 22.98642 | 22.51653 | NaN      | 22.92252 | 26.07112 | 22.85186 |
| 24.15653 | 24.73892 | 24.26785 | 24.56964 | 23.2535  | 24.51051 | 26.46918 | 26.32045 | 26.46918 |
| 25.98685 | 25.7103  | 25.87643 | 26.44253 | 26.53594 | 26.58978 | 25.2021  | 25.42342 | 25.11347 |
| 23.55215 | NaN      | 23.82881 | 23.56384 | 23.88577 | 23.77957 | 24.77957 | 25.15267 | 24.28207 |
| NaN      | NaN      | NaN      | 25.81176 | 24.63201 | 25.54038 | 24.76446 | NaN      | NaN      |
| 26.82639 | NaN      | 26.69975 | 26.29439 | 26.57398 | 26.75175 | 26.71293 | 27.35783 | 27.20769 |
| 25.54922 | 25.60116 | 25.37451 | 26.1546  | 25.89273 | 25.42662 | 25.94503 | 26.2553  | 26.86231 |
| 26.76446 | 24.97158 | 26.97596 | 27.63893 | 27.509   | 27.81421 | 27.95947 | 27.96499 | 28.06085 |
| 24.90885 | 24.82396 | 25.04843 | 24.54628 | 24.59263 | 24.43619 | 28.13614 | 28.65608 | 28.37865 |
| NaN      | NaN      | 24.51653 | 25.13712 | 25.39428 | 25.2535  | NaN      | NaN      | NaN      |
| 28.68646 | 28.69975 | 28.90885 | 27.67303 | 27.48616 | 27.5969  | 27.53148 | 27.21697 | 27.34942 |
| 25.82881 | 25.35448 | 26.40568 | 27.09144 | 26.9428  | 26.95394 | 27.07112 | 27.70636 | 27.16039 |
| 26.98685 | 25.14492 | 27.11148 | 27.11148 | 26.80193 | 27.16997 | 24.51653 | 23.28207 | 24.31008 |
| 25.72858 | 25.30661 | 25.73117 | 26.56529 | 26.48462 | 27.07112 | 27.12139 | 27.12139 | 27.12139 |
| 26.67303 | 27.08132 | 26.51202 | 26.41377 | 26.68646 | 26.78955 | 25.85281 | 26.07521 | 26.1035  |
| 28.04009 | 27.41538 | 28.33671 | 27.00838 | 27.31527 | 27.19835 | 24.317   | NaN      | NaN      |
| 27.81421 | 27.76446 | 27.63893 | 26.50749 | 26.60399 | 26.89735 | NaN      | NaN      | NaN      |
| 25.81665 | 26.30313 | 25.92931 | 25.95172 | 26.01052 | 26.00624 | 25.1757  | 25.14102 | 24.84805 |
| 27.29789 | 27.15074 | 27.2803  | 27.05051 | 26.85043 | 26.98685 | NaN      | NaN      | NaN      |
| 25.16806 | 25.317   | 24.78955 | 24.87643 | 25.39428 | 24.8811  | 24.87643 | 25.46762 | 25.22066 |
| 28.69312 | 29.01372 | 28.82941 | 28.58262 | 28.68646 | 28.66289 | 28.08132 | 28.20769 | 27.98142 |
| 23.29614 | NaN      | NaN      | NaN      | NaN      | NaN      | 26.2553  | 27.6951  | 26.28383 |
| 32.18719 | 31.90813 | 32.34625 | 31.8347  | 31.49667 | 31.70058 | 31.98482 | 32.0927  | 32.14832 |
| 27.78332 | 27.74535 | 27.93157 | 26.21141 | 26.64581 | 26.60399 | 24.98033 | 24.14102 | 24.67573 |
| 26.46607 | 26.95394 | 26.06497 | 25.83123 | 25.84566 | 25.84326 | 26.53445 | 26.42662 | 25.82881 |
| 29.8279  | 30.28692 | 29.91171 | 30.54812 | 30.11148 | 30.11148 | 29.87701 | 30.88285 | 30.14831 |
| 24.01903 | 24.54038 | 23.87643 | 24.53445 | 24.48001 | 24.63201 | 25.90196 | 25.30661 | 25.42982 |
| 25.47383 | 25.48922 | 25.21327 | 25.48308 | 25.46762 | 24.90426 | 25.78207 | 26.0296  | 26.04843 |
| 25.92705 | 25.77203 | 26.00838 | 26.56674 | 26.48616 | 26.391   | 24.64856 | 26.02327 | 25.54038 |
| 28.42742 | 28.29789 | 28.63201 | 28.78019 | 28.71947 | 28.90024 | 28.74855 | 28.66289 | 28.76446 |
| 27.35783 | 27.66628 | 27.3662  | 27.27142 | 27.16039 | 27.26249 | 27.2535  | 27.15074 | 27.19835 |
| 25.7103  | 25.97378 | 25.68378 | 25.68913 | 25.78706 | 25.75685 | 25.2571  | 25.391   | 25.46451 |
| 28.42342 | 28.31527 | 28.83545 | 28.38278 | 28.26249 | 28.30661 | 28.42742 | 28.42742 | 28.56819 |
| 29.05827 | 27.38278 | 29.13858 | 29.4919  | 29.4334  | 29.47267 | 29.15798 | 29.39305 | 29.25124 |
| 29.77392 | 29.91171 | 29.64238 | 30.2535  | 30.47267 | 30.28692 | 30.16039 | 30.18423 | 30.31959 |
| 24.31008 | 24.98902 | 25.48922 | 25.79947 | 24.69179 | 23.57542 | 25.04009 | 26.68646 | 24.2021  |
| 26.58978 | 26.89735 | 27.06085 | 27.46295 | 27.24445 | 27.32389 | 27.31527 | 27.32389 | 27.30661 |
| 25.97378 | 26.22986 | 25.67842 | 25.97815 | 25.74919 | 26.03171 | 25.05672 | 25.04843 | 25.18329 |
| 24.87643 | 25.04427 | 24.94503 | 24.42342 | 24.42342 | 24.64856 | 24.1946  | NaN      | 24.14102 |
| 29.28472 | 29.57903 | 29.07623 | 28.69975 | 29.07112 | 28.86821 | 27.87994 | 28.23535 | 28.509   |
| 27.26249 | 27.20769 | 27.2803  | 26.05879 | 26.18707 | 26.40568 | 22.00196 | NaN      | NaN      |
| 24.70767 | 23.42982 | 24.95837 | NaN      | NaN      | NaN      | 24.55215 | 25.15653 | 25.77957 |
| 25.82153 | 25.71293 | 25.72078 | 25.76446 | 26.0296  | 25.88577 | 25.93832 | 25.94503 | 25.92479 |
| NaN      | 23.64306 | 23.82881 | 23.72858 | 23.22435 | 24.391   | 25.76699 | 25.01052 | 25.58405 |
| 26.03591 | 25.69445 | 26.18139 | 25.92931 | 26.05051 | 25.98251 | 24.12534 | 25.1055  | 24.72858 |
| 25.83364 | 26.26785 | 26.39591 | 26.23169 | 25.73892 | 25.58978 | 25.65676 | 25.317   | 25.79452 |
| 26.16423 | 26.3662  | 25.96279 | 26.40243 | 26.13712 | 25.97596 | 25.79947 | 25.57254 | 24.82881 |
| 24.1795  | 23.79947 | 24.5285  | 23.98468 | 24.31008 | 24.84326 | 24.53445 | 24.22435 | 24.18707 |
| 25.20583 | 24.95394 | 24.10149 | 25.43619 | 26.40406 | NaN      | 27.76446 | 28.06599 | 27.70777 |
| NaN      | NaN      | NaN      | NaN      | NaN      | NaN      | 26.43301 | 25.57542 | 26.06291 |
| NaN      | NaN      | NaN      | NaN      | NaN      | NaN      | NaN      | NaN      | NaN      |
| 23.66492 | 24.2535  | 23.45513 | 23.77957 | 22.81127 | 23.75939 | 25.03171 | 24.40406 | 24.15653 |
| 27.99226 | 28.27142 | 28.04009 | 28.15074 | 28.07623 | 28.23991 | 28.21697 | 28.09144 | 28.15557 |
| 28.40324 | 27.12139 | 28.20303 | 28.27142 | 27.97049 | 27.97049 | 26.72598 | 26.57542 | 26.87408 |
| 25.24264 | 25.33756 | 25.65949 | 25.02327 | 25.06085 | 25.1488  | 26.02115 | 26.60399 | 26.1055  |
| NaN      | 25.98468 | 25.47073 | 25.68646 | 24.67034 | NaN      | 26.01478 | 25.06907 | 26.0041  |
| NaN      | NaN      | NaN      | 24.44253 | 24.417   | NaN      | 24.91342 | 25.07316 | 25.05258 |
| NaN      | 24.34435 | 24.52253 | 25.15267 | 25.31354 | 24.92252 | 26.33756 | 26.33074 | 25.82639 |
| 24.26069 | NaN      | 23.80931 | 24.70767 | 24.67034 | 24.95837 | 25.15267 | 25.1055  | 25.08537 |
| NaN      | 24.59263 | 24.5285  | 23.83846 | 23.86703 | 23.78955 | 24.59833 | 24.58118 | 24.20955 |
| 28.47846 | 28.67303 | 28.45905 | 28.77706 | 28.7357  | 28.58262 | 28.89157 | 28.84745 | 28.92309 |
| 25.87408 | 25.89735 | 26.01478 | 24.98468 | 25.6971  | 25.42021 | 24.80931 | 24.98468 | 24.62087 |

|          |          |          |          |          |          |          |          |          |
|----------|----------|----------|----------|----------|----------|----------|----------|----------|
| 26.71293 | 26.42982 | 26.2803  | 26.51653 | 26.51653 | 26.96499 | 26.10749 | 26.04218 | 25.81176 |
| 24.28912 | 24.75939 | 24.63755 | 23.95837 | 24.33074 | 24.14102 | 24.35111 | NaN      | 24.31008 |
| 26.038   | NaN      | 26.13124 | 25.34096 | 25.56092 | 26.40568 | 22.01903 | 22.9968  | 23.44253 |
| 27.06085 | 27.52402 | 27.0296  | 26.52552 | 26.26607 | 26.15074 | 25.91342 | 26.24627 | 25.71555 |
| 25.55215 | 25.53445 | 25.37451 | 26.24989 | 25.34773 | 26.36286 | 26.35783 | 26.27675 | 25.78955 |
| 24.54628 | 25.27853 | 25.50749 | 25.37782 | 25.53445 | 25.8811  | 25.64031 | 26.61807 | 25.99766 |
| 26.60399 | 26.85043 | 26.81421 | 26.46762 | 26.54922 | 26.49076 | 26.47537 | 26.63201 | 26.73892 |
| 23.12376 | 23.86703 | 23.35111 | 22.60964 | 22.52373 | NaN      | 26.13907 | 24.86231 | 24.94949 |
| NaN      | NaN      | NaN      | NaN      | NaN      | NaN      | 26.31354 | 26.16039 | 26.31181 |
| 24.93607 | 25.60399 | 25.19835 | 24.92252 | 25.15653 | 25.20583 | 25.89504 | 25.95837 | 25.96939 |
| 24.77455 | 24.55801 | 24.34435 | 25.16806 | 25.33074 | 25.317   | 24.74407 | 24.76446 | 24.65949 |
| 25.43619 | 25.61807 | 25.61526 | 25.04009 | 25.14102 | 25.54038 | 26.23352 | 26.24445 | 26.09949 |
| 23.85757 | 24.35783 | 23.74919 | 24.55215 | 23.81909 | 24.37782 | 23.96719 | 24.10949 | 24.28207 |
| NaN      | NaN      | NaN      | NaN      | NaN      | NaN      | NaN      | NaN      | NaN      |
| 24.08537 | 24.00196 | 23.94949 | 24.2021  | 24.60964 | 24.239   | 23.57542 | 23.5285  | 24.41054 |
| 26.16615 | 25.98468 | 26.37451 | 26.64581 | 26.67303 | 26.78955 | 26.37451 | 26.78955 | 26.35448 |
| 27.01903 | 27.34096 | 27.14102 | 27.23535 | 27.37451 | 27.37451 | 25.76446 | 25.99335 | 26.23535 |
| 26.317   | 26.52999 | 26.48001 | 26.67303 | 26.30661 | 26.63201 | 25.55215 | 25.08537 | 25.1757  |
| 26.15653 | 24.58118 | 25.84566 | 25.42982 | 25.37119 | 25.41377 | NaN      | NaN      | NaN      |
| 27.27142 | 27.73892 | 27.46295 | 26.54628 | 26.13907 | 26.26249 | 25.64581 | 25.22435 | 25.42342 |
| 30.77706 | 30.57542 | 30.91171 | 30.38278 | 30.26472 | 30.68813 | 28.84446 | 28.81115 | 28.86526 |
| 25.74919 | 25.78207 | 26.23717 | 27.22619 | 26.75175 | 26.85043 | 27.92592 | 27.41538 | 28.35363 |
| NaN      | NaN      | NaN      | NaN      | NaN      | NaN      | 26.07316 | 26.06085 | 25.85281 |
| NaN      | NaN      | NaN      | NaN      | 25.41054 | 24.38443 | 24.94949 | 24.44253 | 24.20955 |
| 23.65403 | NaN      | 24.03591 | 23.57542 | NaN      | 24.29614 | 24.55215 | 25.11744 | 24.38443 |
| NaN      | NaN      | 23.07398 | 24.317   | 23.50446 | NaN      | 24.17188 | 24.30313 | 24.17188 |
| 23.98468 | NaN      | 24.04427 | 25.12139 | 23.79947 | 24.56384 | 24.55215 | 24.79947 | 24.99335 |
| 26.73892 | 27.22619 | 26.58978 | 27.10149 | 27.04009 | 26.97596 | 27.54628 | 27.3662  | 27.26249 |
| 26.35111 | 26.06907 | 26.2535  | 26.88577 | 26.58978 | 27.0296  | 27.00838 | 26.80193 | 26.75175 |
| NaN      | 25.89273 | NaN      | NaN      | NaN      | NaN      | 25.54922 | 25.87643 | 25.61246 |
| 25.37782 | 25.29964 | 25.37782 | 25.96279 | 25.94056 | 25.26428 | 25.44569 | 25.18707 | 25.22803 |
| 26.06497 | 25.72598 | 26.04427 | 25.84805 | 25.93832 | 25.48922 | 24.95394 | NaN      | 25.68913 |
| NaN      | NaN      | NaN      | 24.58118 | 24.65403 | 24.83364 | 25.79699 | 25.43301 | 25.60399 |
| 24.52253 | 25.02327 | 24.63755 | 25.36119 | 24.96719 | 24.99335 | 24.56384 | 24.44884 | 24.64306 |
| 25.72078 | NaN      | 25.7103  | 26.03381 | 26.54775 | 26.09949 | 24.92705 | 25.48616 | 26.24264 |
| 24.2021  | 24.48616 | 24.26785 | 24.58118 | 25.57254 | 24.1332  | 24.28207 | 23.68646 | 24.38443 |
| 25.09748 | 25.03591 | 25.35783 | 25.417   | 25.03171 | 25.33074 | 25.42982 | 24.96279 | 25.32732 |
| 26.33074 | 26.38936 | 26.09346 | 26.32045 | 25.85519 | 26.12337 | 25.9428  | 25.34435 | 26.05051 |
| 24.94503 | 25.21327 | 24.82396 | 24.85757 | 24.22435 | 24.87643 | 25.06907 | 25.27498 | 25.12139 |
| 25.13712 | 25.16806 | 24.90426 | 25.82881 | 25.86938 | 26.00624 | 26.23535 | 25.51953 | 26.64306 |
| 24.41054 | 24.69179 | 24.391   | 25.76446 | 24.60399 | 24.94503 | 25.64031 | 26.03381 | 25.55215 |
| 25.37119 | 25.82881 | 25.79947 | 26.22986 | 26.20583 | 26.1055  | 26.73892 | 26.95394 | 26.85043 |
| NaN      | 24.06907 | 23.84805 | 24.03591 | 23.83846 | 24.02749 | NaN      | 24.29614 | 23.97596 |
| 24.417   | 24.54628 | NaN      | 24.17188 | 23.97596 | 25.26428 | 23.83846 | 24.37119 | 23.58692 |
| 24.67573 | 24.50446 | NaN      | 24.66492 | 24.84326 | 24.91798 | 26.01478 | 26.19648 | 25.6971  |
| 23.94056 | 23.88577 | 23.54038 | 23.91342 | 24.00196 | 24.16423 | 23.29614 | 24.00196 | 23.417   |
| 27.00838 | 27.16039 | 27.4073  | 27.64581 | 27.42342 | 27.68646 | 27.4073  | 27.54628 | 27.15074 |
| 27.16039 | 25.33074 | 26.00196 | 25.78706 | 26.43619 | 26.69975 | 25.30313 | 25.20583 | 25.81176 |
| NaN      | NaN      | NaN      | NaN      | NaN      | NaN      | NaN      | NaN      | NaN      |
| 27.67976 | 26.45356 | 27.71947 | 27.31527 | 27.12139 | 27.391   | 25.97158 | 27.34942 | 26.71293 |
| 24.7543  | 25.06907 | 24.01903 | 24.8811  | 24.28912 | 24.44253 | 24.27498 | 24.84326 | 24.79947 |
| 28.72273 | 26.82639 | 28.78644 | 28.96224 | 29.14589 | 29.22159 | 29.13858 | 29.09144 | 29.28251 |
| 27.04009 | 27.48616 | 27.26249 | 27.65949 | 27.80193 | 27.65267 | 26.93157 | 26.93157 | 26.61807 |
| 25.35448 | 26.71293 | 25.33756 | 26.22435 | 26.68646 | 26.13516 | 27.46295 | 27.28912 | 26.95394 |
| 25.96719 | 26.4073  | 25.94726 | 26.43778 | 26.14297 | 25.7103  | 26.04635 | 26.0041  | 26.06907 |
| NaN      | NaN      | NaN      | NaN      | NaN      | NaN      | 24.8811  | 24.89966 | 24.85757 |
| 23.87643 | 23.93157 | 23.95837 | 23.16116 | 23.79947 | NaN      | 23.37782 | 23.46762 | 24.50446 |
| 27.42342 | 27.44727 | 27.31527 | 27.56819 | 27.80809 | 27.65267 | 26.57398 | 26.65949 | 26.71293 |
| 25.92931 | 26.20023 | 25.95615 | 25.70767 | 25.77957 | 25.85281 | 25.42021 | 25.72858 | 25.79699 |
| 26.72598 | 27.01903 | 26.95394 | 26.07316 | 26.61807 | 26.87408 | 26.82639 | 26.13712 | 26.31872 |
| 25.61807 | 25.85994 | 25.54628 | 26.15267 | 25.75685 | 25.67842 | 26.51202 | 26.46139 | 25.93607 |
| 28.45905 | 28.29351 | 28.80501 | 28.70306 | 28.73247 | 28.61807 | 28.37036 | 28.06599 | 28.21697 |
| 25.13712 | 25.08942 | 24.50446 | 26.11545 | 25.92705 | 25.76192 | 25.73892 | 25.68378 | 25.81421 |
| 27.14102 | 26.61807 | 27.38278 | 27.54628 | 27.56092 | 27.58978 | 27.28912 | 27.06085 | 26.9428  |
| 26.98685 | 27.19835 | 27.01903 | 26.45826 | 26.57542 | 27.05051 | 25.69445 | 25.78207 | 25.70504 |
| 26.04843 | 26.22435 | 26.02327 | 26.04009 | 26.35279 | 26.23535 | 22.65403 | NaN      | NaN      |
| 25.08942 | 25.02327 | 24.46139 | 24.83364 | 25.17188 | 24.97158 | 25.33756 | 25.22435 | 26.57109 |
| NaN      | 29.44332 | 28.99496 | 28.85638 | 27.95394 | 28.94838 | 28.28912 | 28.39509 | 28.51653 |
| NaN      | NaN      | 23.5285  | NaN      | NaN      | NaN      | 24.01903 | 24.01903 | NaN      |
| NaN      | NaN      | 22.1673  | NaN      | NaN      | NaN      | NaN      | NaN      | NaN      |
| 24.59263 | 24.7024  | 24.7543  | 24.42982 | 24.90426 | 25.12534 | 25.13712 | 25.78706 | 25.89504 |
| 24.39754 | 25.63478 | 24.38443 | NaN      | 24.18707 | NaN      | 24.28207 | 24.80931 | 24.5285  |
| NaN      | 24.42342 | 24.00196 | 23.97596 | NaN      | NaN      | 23.98468 | 24.34435 | NaN      |
| NaN      | 23.94056 | NaN      | NaN      | NaN      | NaN      | 24.65403 | NaN      | NaN      |
| 24.94503 | 24.88577 | 25.38113 | 24.84805 | 24.89966 | 24.7543  | 24.27498 | 24.56964 | 24.46762 |
| NaN      | NaN      | 24.33074 | NaN      | NaN      | 25.47383 | NaN      | NaN      | NaN      |
| 26.08335 | 26.23717 | 26.18707 | 24.92252 | 25.70504 | 25.73892 | 25.28912 | 25.12928 | 25.10149 |
| 24.89504 | 24.86231 | 24.6811  | 25.00624 | 23.95837 | 24.48001 | NaN      | NaN      | NaN      |
| 26.06497 | 25.71816 | 25.9955  | 25.55801 | 25.51051 | 25.80193 | 25.60682 | 26.00624 | 25.37451 |
| 25.36786 | 25.78955 | 25.1488  | 24.91798 | 25.2535  | 24.92705 | 25.67303 | 25.46762 | 25.64581 |
| 25.06907 | NaN      | 23.81909 | 23.89504 | 22.46762 | 22.77354 | 24.59263 | 24.34435 | 24.38443 |
| 25.86231 | 25.85043 | 25.6811  | 26.32389 | 25.93832 | 26.36453 | 24.73376 | 24.65403 | 24.86703 |
| 25.77957 | 26.35783 | 26.33586 | 26.77706 | 27.05051 | 26.82639 | 26.06291 | 26.57542 | 25.92025 |
| 24.54628 | 24.83846 | 24.96279 | 24.10149 | 24.1795  | 24.11744 | 23.94949 | 24.03591 | 24.46762 |
| 25.54038 | 25.21327 | 25.04427 | 24.98902 | 24.66492 | 25.15653 | 24.7024  | 23.29614 | 25.14492 |
| 23.06579 | NaN      | 22.17035 | 25.22803 | 24.26069 | 23.96719 | 24.87173 | 24.26069 | 24.16423 |
| 27.1795  | 27.42342 | 27.22619 | 26.55947 | 26.61807 | 26.64581 | NaN      | NaN      | NaN      |
| 24.96279 | 26.26964 | 24.72338 | 25.1795  | 25.10949 | 25.46451 | 24.391   | 24.30313 | 24.11744 |

|          |          |          |          |          |          |          |          |          |
|----------|----------|----------|----------|----------|----------|----------|----------|----------|
| 27.33245 | 27.56092 | 27.28912 | 27.55362 | 27.74535 | 27.54628 | 27.97049 | 27.85043 | 27.85638 |
| NaN      | 22.66926 | NaN      | 22.75532 | 21.71816 | NaN      | 23.15499 | 23.54038 | 22.25638 |
| 25.94949 | 25.91798 | 26.1946  | 25.93382 | 25.78207 | 26.15074 | 24.83846 | 24.26069 | 24.48616 |
| 24.55801 | NaN      | 24.28207 | 24.64856 | 24.1332  | 24.99335 | 25.09346 | 24.72338 | 24.69179 |
| 25.07725 | 26.04009 | 25.74407 | 25.31008 | 25.02749 | 25.28207 | 25.1946  | 25.14492 | 24.94056 |
| 25.31008 | 25.48308 | 25.03591 | 25.18707 | 25.48001 | 25.43936 | 25.08132 | 24.74919 | 25.13712 |
| 23.88577 | 24.31008 | 24.17188 | 24.76446 | 24.54628 | 24.65949 | 25.47383 | 25.32389 | 25.4073  |
| NaN      | 25.43301 | 25.34773 | 24.64856 | 24.391   | 24.56964 | NaN      | 25.17188 | 24.34435 |
| 24.76446 | 25.47383 | 25.4008  | 24.77455 | 25.4008  | 25.36119 | 26.52253 | 26.30313 | 26.12337 |
| 23.81909 | 24.18707 | 23.18101 | 22.93337 | 23.37782 | 23.51653 | 24.06085 | 24.06907 | 23.85757 |
| 24.1795  | NaN      | 24.72858 | NaN      | NaN      | NaN      | 24.54628 | 24.86231 | 24.44253 |
| NaN      | 23.68646 | 24.31008 | 24.44253 | 22.50203 | 23.57542 | 25.21327 | 25.59548 | 24.85757 |
| 23.89504 | NaN      | 23.79947 | 23.89504 | 23.93157 | 24.1332  | NaN      | 24.09346 | 24.16423 |
| NaN      | NaN      | NaN      | NaN      | NaN      | NaN      | NaN      | 24.22435 | 23.93157 |
| NaN      | 24.35783 | 23.65403 | 24.78457 | 24.79947 | 24.02749 | 23.87643 | 24.417   | 24.82396 |
| NaN      | 25.239   | 24.01903 | NaN      | NaN      | 24.7543  | 24.1795  | NaN      | NaN      |
| 24.29614 | 24.14102 | 23.60964 | 24.50446 | 23.65403 | 25.26785 | 25.1055  | 24.97158 | 24.49228 |
| 24.71816 | 23.99335 | 23.82881 | 24.02749 | 24.31008 | 24.51051 | 25.45826 | 24.26785 | 24.04427 |
| NaN      | NaN      | NaN      | 23.81909 | 23.48001 | NaN      | 24.8811  | 24.56384 | 24.85757 |
| NaN      | NaN      | NaN      | NaN      | 24.47383 | NaN      | 25.38772 | 25.1055  | 25.29263 |
| 24.94056 | 24.89966 | 25.22803 | 24.59833 | 24.89504 | 24.80931 | 24.05258 | 24.35111 | 24.29614 |
| NaN      | NaN      | NaN      | 23.04093 | NaN      | 23.49228 | 23.24191 | NaN      | NaN      |
| 24.78955 | 25.40406 | 25.36786 | 24.64856 | 25.21697 | 24.00196 | NaN      | NaN      | NaN      |
| 23.42982 | 24.51653 | 24.06907 | 24.01052 | NaN      | NaN      | 24.65949 | NaN      | 24.61526 |
| 26.58978 | 26.51653 | 27.64581 | 26.2803  | 26.04427 | 27.49381 | 26.60399 | 26.2732  | 27.41538 |
| 29.29789 | 28.52402 | 29.28692 | 29.78644 | 29.66628 | 29.54628 | 29.65267 | 29.53148 | 29.73085 |
| 25.62087 | 24.79947 | 24.35783 | 25.21697 | 25.02749 | 23.93157 | 25.64581 | 25.11347 | 25.29964 |
| NaN      | 25.26069 | NaN      | 24.82881 | 23.62087 | NaN      | 24.91342 | 24.96719 | 25.08537 |
| 26.02538 | 25.62645 | 25.72858 | 26.2571  | 26.31181 | 26.27853 | 25.30313 | 26.1946  | 25.63201 |
| NaN      | 26.391   | 24.94503 | 24.87643 | NaN      | NaN      | 24.79947 | 25.09748 | 24.70767 |
| 24.01052 | 24.23169 | 23.91342 | 24.317   | 24.02749 | 24.44884 | 24.04427 | 24.38443 | 24.22435 |
| 23.51653 | 24.10149 | 22.85567 | 23.6971  | 23.63201 | 24.69179 | 23.75939 | 24.54628 | 23.33756 |
| 25.58405 | NaN      | 24.82396 | 24.50446 | 24.8811  | 25.23169 | 24.6971  | 24.81909 | 24.2535  |
| 25.60964 | 26.30661 | 25.96499 | 25.21697 | 25.38772 | 25.60399 | NaN      | 24.68646 | NaN      |
| NaN      | NaN      | NaN      | NaN      | NaN      | NaN      | 25.14102 | NaN      | NaN      |
| 24.85757 | 25.27142 | 24.6811  | 25.66763 | 25.20583 | 25.27853 | 25.01478 | 25.26785 | 24.95837 |
| NaN      | NaN      | NaN      | NaN      | NaN      | NaN      | 23.65403 | 23.62087 | 23.15653 |
| NaN      | 24.77957 | 24.37782 | 24.48616 | 25.01052 | 24.91798 | NaN      | NaN      | NaN      |
| 23.88577 | NaN      | 24.59263 | 23.97596 | 23.73892 | 23.64306 | 25.03591 | 25.31008 | 24.70767 |
| 24.239   | 24.317   | 24.05258 | 23.62087 | 23.79947 | 23.72858 | 23.45513 | 22.79352 | 23.32389 |
| NaN      | NaN      | NaN      | 22.94949 | NaN      | NaN      | NaN      | NaN      | NaN      |
| 24.00196 | 24.32389 | 24.04427 | 23.76951 | 24.1795  | 24.23169 | 24.37119 | 25.45199 | 23.84805 |
| 25.08132 | 25.1055  | 24.27498 | 23.6971  | 23.64306 | 24.26785 | NaN      | NaN      | 23.31008 |
| 25.54333 | 25.68913 | 25.64581 | 25.72858 | 25.35111 | 25.63201 | 25.50446 | 26.56384 | NaN      |
| 23.6971  | NaN      | 24.17188 | 23.72858 | 23.5285  | 23.93157 | NaN      | NaN      | NaN      |
| 23.05424 | 23.46762 | NaN      | 23.0592  | 22.85567 | NaN      | 25.14492 | 24.84326 | 24.31008 |
| 23.98468 | 24.14102 | 23.06415 | NaN      | 25.13712 | 23.5285  | 25.42662 | 24.43619 | 24.00196 |
| 24.21697 | NaN      | 24.1795  | NaN      | NaN      | NaN      | NaN      | 24.6811  | 24.72338 |
| 23.91342 | 24.71816 | 24.11744 | 24.58692 | 24.11744 | 24.37119 | NaN      | 23.82881 | NaN      |
| 24.63201 | 24.54628 | 24.14102 | 24.52253 | 24.79452 | 24.77455 | NaN      | 24.36453 | NaN      |
| 27.07112 | 26.93157 | 27.52402 | 25.44569 | 25.55215 | 25.81176 | 23.75939 | 23.74919 | 23.92252 |
| 26.46295 | 26.75175 | 26.01265 | 25.88344 | 26.34942 | 26.16039 | 26.20583 | 26.21327 | 26.15267 |
| 25.00624 | 25.06497 | 24.66492 | 24.72858 | 25.10149 | 25.08537 | NaN      | NaN      | NaN      |
| NaN      | NaN      | NaN      | 25.07725 | 24.52253 | 25.49534 | NaN      | 23.94056 | 24.51051 |
| 26.54775 | 26.56964 | 24.95394 | 25.80193 | 26.33074 | 26.01265 | NaN      | 23.31008 | 23.62087 |
| 24.49838 | 24.65403 | 24.71293 | 25.76446 | 25.66492 | 25.91342 | 27.81421 | 27.71293 | 27.74535 |
| 26.24445 | 25.85519 | 25.47692 | 25.08132 | 25.63755 | 25.50446 | 25.68913 | 26.13712 | 25.8044  |
| 26.11148 | 26.39428 | 26.1546  | 25.84086 | 26.01903 | 26.33756 | 26.78955 | 26.56674 | 26.65949 |
| NaN      | NaN      | NaN      | 24.65403 | 23.50446 | 24.20955 | 25.10149 | 24.85281 | 25.24989 |
| 29.34942 | 29.28692 | 29.02697 | 28.65608 | 28.08639 | 29.14102 | 29.07877 | 29.00571 | 28.06085 |
| 24.80931 | 25.10149 | 24.73892 | 24.74919 | 25.02749 | 24.99335 | 24.99335 | 24.64856 | 24.73892 |
| 27.70636 | 27.43141 | 27.86821 | 27.75812 | 27.83846 | 28.05569 | 28.05569 | 28.12633 | 28.13614 |
| 26.88577 | 23.65403 | 27.20769 | 25.08942 | 27.43936 | 27.13124 | 25.417   | 26.73892 | 24.97158 |
| NaN      | 24.65403 | 24.86703 | 25.48308 | 25.98251 | 25.76446 | 24.68646 | 24.85757 | 24.76951 |
| 24.85281 | 30.04791 | 24.81909 | 24.89504 | 24.91798 | 24.98902 | 24.83364 | 24.1795  | 24.99335 |
| NaN      | 24.72338 | 24.88577 | 23.95837 | 23.84805 | 24.00196 | 27.08132 | 26.47692 | 27.0296  |
| 24.98902 | 25.18707 | 24.85281 | 25.1055  | 24.62645 | 24.94503 | 25.31354 | 24.95837 | 25.18329 |
| NaN      | NaN      | NaN      | NaN      | NaN      | NaN      | 24.34435 | 24.239   | NaN      |
| 25.55801 | 25.96499 | 24.94949 | 25.68378 | 25.48308 | 26.05672 | 25.27142 | 25.37782 | 25.07725 |
| 25.54333 | 25.63478 | 25.12928 | 25.29964 | 25.39754 | 24.81421 | 25.56092 | 25.65403 | 25.50749 |
| 25.03171 | 25.01903 | 25.03591 | 25.33415 | 25.19084 | 25.09748 | 24.70767 | 24.42342 | 24.26069 |
| 27.19835 | 26.97596 | 26.86231 | 26.76446 | 26.60399 | 26.71293 | 25.53445 | 25.57542 | 24.92252 |
| 24.82396 | 24.71816 | 24.28912 | 24.72858 | 24.63755 | 24.35783 | 25.48001 | 25.37119 | 25.22066 |
| 24.09346 | NaN      | NaN      | 24.28207 | 23.62087 | 23.84805 | 24.97596 | 25.04843 | 25.13712 |
| 25.32732 | 25.66492 | 25.2535  | 24.47383 | 23.82881 | 24.32389 | 27.3662  | 27.2803  | 27.2803  |
| 23.62087 | 24.16423 | 23.82881 | 24.26785 | 24.26069 | 24.18707 | 26.05879 | 25.91114 | 25.81665 |
| NaN      | NaN      | NaN      | NaN      | NaN      | NaN      | 25.05258 | 24.74407 | 25.37451 |
| 27.34942 | 27.22619 | 27.391   | 26.69975 | 26.90885 | 27.07112 | 26.63201 | 26.46139 | 26.55069 |
| 27.49381 | 27.20769 | 27.52402 | 26.92025 | 26.85043 | 26.82639 | 27.53148 | 27.54628 | 27.35783 |
| 26.20583 | 26.33415 | 26.03381 | NaN      | 26.60399 | 26.52253 | 24.41054 | 23.6971  | 23.92252 |
| 24.79947 | 24.31008 | 24.35111 | 24.69179 | 24.05258 | 23.99335 | 23.48001 | 23.71816 | 23.07071 |
| 22.94235 | NaN      | 23.01052 | 23.08699 | NaN      | 22.59605 | 23.03423 | 22.86325 | 22.89319 |
| 27.34942 | 27.35783 | 27.39917 | 27.01903 | 26.92025 | 26.92025 | 26.82639 | 26.81421 | 26.81421 |
| 24.60964 | NaN      | 24.35111 | 24.63201 | 24.74407 | 24.24627 | 24.12534 | 23.86703 | NaN      |
| 26.53594 | 25.84086 | 26.32732 | 26.63201 | 26.21141 | 25.9157  | 26.4581  | 26.29614 | 26.4346  |
| 25.18329 | 25.26785 | 25.57542 | 24.34435 | 23.99335 | 24.239   | NaN      | NaN      | NaN      |
| 25.64031 | 25.88809 | 25.57254 | 25.43301 | 25.51953 | 25.54333 | 24.71293 | 25.37782 | 25.29614 |
| 26.20583 | 26.07112 | 26.417   | 25.58978 | 25.60399 | 25.2535  | 25.34773 | 24.7024  | 25.10149 |

|          |          |          |          |          |          |          |          |          |
|----------|----------|----------|----------|----------|----------|----------|----------|----------|
| 23.66492 | 23.46762 | 23.76951 | NaN      | NaN      | 22.95305 | 24.57542 | 24.32389 | 23.94056 |
| 26.63201 | 26.5389  | 26.60399 | 26.87408 | 27.30661 | 27.3662  | 26.2589  | 26.76446 | 26.239   |
| 25.84326 | 24.81421 | 24.20955 | NaN      | 24.391   | NaN      | 24.74919 | 24.89966 | 24.91798 |
| 26.17379 | 26.57542 | 26.08942 | 26.3662  | 25.89273 | 25.71816 | 26.77706 | 26.37617 | 26.34266 |
| 27.88577 | 28.07623 | 28.15074 | 28.05569 | 27.90311 | 28.01372 | 27.56819 | 27.45513 | 27.53148 |
| 27.55362 | 27.82639 | 27.56092 | 27.29789 | 27.38278 | 27.22619 | 26.90885 | 27.12139 | 26.97596 |
| 25.11744 | 25.91798 | 25.59263 | 25.12139 | 25.48308 | 25.35111 | 26.61807 | 26.9428  | 26.81421 |
| 24.74919 | 25.16806 | 24.1795  | 25.02749 | 25.07316 | 24.94949 | 24.64856 | 24.77455 | 24.79452 |
| 24.11744 | 24.90885 | 23.89504 | 24.44884 | 25.33415 | 23.31008 | 24.94056 | 25.76699 | 24.59833 |
| 24.98902 | 24.88577 | 25.32045 | 25.64581 | 24.95394 | 25.51953 | 24.57542 | 25.07316 | 24.78457 |
| 27.49381 | 27.509   | 27.3662  | 27.9428  | 28.01372 | 28.01372 | 27.79576 | 27.73892 | 27.90885 |
| 23.33756 | 24.66492 | 24.06085 | 24.69179 | 24.66492 | 25.18707 | 22.54981 | 22.23023 | 22.82687 |
| 25.41377 | 25.86703 | 25.37782 | 24.94056 | 24.94949 | 25.02327 | NaN      | NaN      | 23.15345 |
| 24.74919 | 24.95837 | 24.83364 | 24.40406 | 24.79452 | 24.37782 | 24.36453 | 25.01478 | 24.86703 |
| 24.16423 | 24.27498 | 23.29614 | 23.72858 | 23.42982 | 23.68646 | 23.32389 | 23.84805 | 24.41054 |
| 25.29614 | 25.24264 | 24.75939 | 24.76951 | 24.93607 | 24.58118 | 24.63755 | 24.77957 | 24.28207 |
| 25.79947 | 25.91342 | 25.87173 | 26.2571  | 26.27675 | 26.49228 | 26.82639 | 26.41054 | 26.88577 |
| 22.35111 | 22.26213 | 22.79154 | NaN      | NaN      | 22.44    | 22.52373 | 23.0592  | 22.81127 |
| 26.10149 | 26.71293 | 26.09748 | 26.73892 | 26.69975 | 26.1488  | 26.13712 | 26.44095 | 26.19272 |
| 24.2021  | 24.23169 | 22.96719 | 23.73892 | 23.90426 | 23.31008 | 24.391   | 24.06085 | 24.55215 |
| 22.42726 | NaN      | 22.04593 | 22.73273 | NaN      | 22.51171 | 22.83461 | 22.21845 | NaN      |
| 29.42542 | 29.56456 | 29.40324 | 28.70636 | 28.45905 | 28.45905 | 28.22159 | 28.28912 | 28.29351 |
| 25.22066 | 25.00196 | 25.20955 | 24.83846 | 24.01903 | 24.93157 | 25.04427 | NaN      | NaN      |
| 24.6811  | 24.86703 | 24.82396 | 24.5285  | 24.42342 | 24.07725 | NaN      | 24.97596 | 23.73892 |
| 23.84805 | 24.14102 | 23.87643 | 23.73892 | 23.88577 | 23.75939 | 24.17188 | 24.2535  | 24.51653 |
| 24.74407 | 24.54628 | 24.34435 | 24.86703 | 24.90885 | 24.65403 | 24.88577 | 24.36453 | 24.46139 |
| 23.86703 | 23.87643 | 24.10149 | 24.02749 | 24.391   | 23.95837 | NaN      | 24.42342 | 23.64306 |
| NaN      | NaN      | NaN      | NaN      | NaN      | NaN      | 24.71816 | 24.65403 | 24.52253 |
| 24.28912 | 24.06907 | 23.417   | 24.00196 | 23.89504 | 23.79947 | NaN      | NaN      | NaN      |
| 24.81909 | NaN      | 24.08537 | 25.62645 | 24.63201 | 25.21697 | NaN      | 24.86231 | NaN      |
| 25.92479 | 26.39754 | 25.67573 | 26.00624 | 25.91798 | 25.24264 | 26.00624 | 26.53742 | 25.89041 |
| 26.43301 | 26.73892 | 26.33756 | 26.11942 | 25.7415  | 26.038   | NaN      | NaN      | NaN      |
| 24.40406 | 24.27498 | 24.55801 | 24.98033 | 24.85281 | 24.46762 | NaN      | NaN      | NaN      |
| 26.34096 | 25.62645 | 26.11942 | 26.05672 | 25.83364 | 25.5285  | 24.59833 | 25.2535  | 25.34096 |
| 25.90885 | 25.76192 | 25.87877 | 25.44884 | 25.27853 | 25.22435 | 24.94056 | 25.12534 | 24.69179 |
| 25.24627 | 25.56964 | 25.42021 | 25.239   | 25.12534 | 25.43936 | 24.64856 | 24.43619 | 24.40406 |
| 23.11744 | 22.42214 | NaN      | 23.59833 | 23.70767 | 24.24627 | NaN      | NaN      | NaN      |
| NaN      | 28.04531 | 24.2021  | 25.81909 | 25.92705 | 26.30487 | 25.32045 | 30.00838 | 25.2571  |
| 23.96719 | 24.317   | 24.24627 | 24.70767 | 24.5285  | 24.08537 | NaN      | NaN      | 23.32389 |
| 24.95837 | NaN      | 23.78955 | 25.34773 | 24.44884 | 24.14102 | 25.32389 | 25.03171 | 25.44569 |
| 23.44253 | NaN      | NaN      | NaN      | NaN      | NaN      | 23.40406 | NaN      | 23.50446 |
| 24.81909 | 24.95837 | 24.63201 | 24.2535  | 23.91342 | 24.84326 | 24.05258 | 24.29614 | 24.33756 |
| NaN      | NaN      | 23.46762 | 23.33756 | 23.33756 | 23.03591 | 23.32389 | 24.8616  | 23.92252 |
| 26.47383 | 26.69975 | 26.15653 | 25.79452 | 25.34096 | 25.51953 | 24.63755 | NaN      | NaN      |
| 24.51051 | 25.2856  | 24.95837 | 24.29614 | 25.00624 | 24.87173 | 24.98468 | 24.05258 | 24.74919 |
| 27.58262 | 27.19835 | 27.83846 | 27.89735 | 27.81421 | 28.01903 | 27.04009 | 26.92025 | 27.11148 |
| 28.92592 | 28.78644 | 28.85638 | 28.88867 | 28.57903 | 28.73892 | 27.77706 | 27.58978 | 27.61105 |
| 26.01478 | 26.33074 | 25.85994 | 26.23169 | 26.11744 | 26.15074 | 26.78955 | 26.81421 | 27.04009 |
| NaN      | NaN      | NaN      | NaN      | NaN      | NaN      | 24.60399 | 24.61719 | 24.84805 |
| 27.79576 | 27.90311 | 27.87994 | 27.58978 | 27.45513 | 27.52402 | 26.40568 | 25.84086 | 26.18329 |
| 22.72025 | 23.49228 | NaN      | NaN      | 23.68646 | 23.20658 | 24.07725 | NaN      | 23.78955 |
| 25.64856 | 25.97815 | 25.9428  | 25.45199 | NaN      | 25.31008 | NaN      | NaN      | 25.43619 |
| NaN      | 23.35111 | 23.15499 | 23.70767 | 23.12849 | 23.21845 | 23.87643 | NaN      | 24.6762  |
| 27.04009 | 26.64581 | 27.0296  | 26.40406 | 26.26964 | 26.33586 | 25.16039 | 25.34435 | 25.23535 |
| 26.65949 | 27.00838 | 26.57398 | 26.60399 | 26.68646 | 26.71293 | 26.33245 | 26.27853 | 26.30835 |
| 23.94056 | NaN      | NaN      | 22.94592 | 23.67573 | 24.54628 | 27.58978 | 26.98685 | 27.53148 |
| NaN      | 23.1031  | NaN      | NaN      | NaN      | 23.45513 | 25.53742 | 24.8044  | 25.65949 |
| 26.61807 | 25.20955 | 26.11347 | 25.73892 | 25.66221 | 25.62923 | 25.65949 | NaN      | NaN      |
| 25.51051 | 25.60116 | 25.47383 | 26.06291 | 25.99981 | 26.13712 | 25.52253 | 25.98902 | 25.85757 |
| 24.92705 | 24.50446 | 25.28912 | 24.37119 | 25.1332  | 24.05258 | 23.92252 | 24.00196 | 24.03591 |
| NaN      | 23.70767 | 23.62087 | 23.94949 | 23.81909 | 23.42982 | 23.93157 | 23.66492 | 23.89504 |
| NaN      | NaN      | NaN      | NaN      | NaN      | NaN      | 24.22435 | 23.96719 | 23.05258 |
| 25.06907 | NaN      | 24.75939 | 24.81909 | NaN      | 25.37782 | NaN      | NaN      | NaN      |
| 23.83846 | NaN      | NaN      | 24.01052 | 24.26785 | 24.21697 | NaN      | NaN      | NaN      |
| NaN      | NaN      | NaN      | 23.49228 | 22.81127 | 22.40925 | NaN      | NaN      | 23.15808 |
| NaN      | 24.29614 | 24.417   | 24.89041 | 24.72338 | 24.18707 | 24.391   | 25.05258 | 25.1055  |
| 24.89504 | 24.47383 | 24.65949 | 25.69975 | 25.42021 | 24.99335 | 24.74919 | 24.72858 | 24.60399 |
| 25.56674 | 25.07316 | 25.54922 | 25.77203 | 25.7103  | 25.66221 | 24.20955 | 23.72858 | 24.09346 |
| 25.77957 | 26.06702 | 25.7024  | 25.1946  | 24.89966 | 24.66492 | 24.05258 | 25.12928 | 24.1332  |
| 24.03591 | 26.09144 | 24.06907 | 24.07725 | 24.04427 | 24.12534 | 25.48922 | 24.85757 | 25.61526 |
| 25.16806 | 25.73635 | 25.32389 | 25.58405 | 25.59548 | 25.52552 | 25.67842 | 25.52552 | 25.94056 |
| 24.52253 | 24.08537 | 24.39754 | 24.01052 | 23.48001 | 23.66492 | 23.6971  | 24.86703 | 24.24627 |
| 24.26069 | 23.98468 | 23.6971  | 24.57542 | 24.97596 | 24.31008 | 22.53564 | 23.391   | NaN      |
| 25.83846 | 25.69445 | 25.70504 | 25.41054 | 25.20583 | 25.51352 | 23.65403 | NaN      | NaN      |
| 24.94949 | 24.71816 | 24.62645 | 24.76446 | 24.5285  | 24.68646 | 24.47383 | 24.85757 | 23.91342 |
| 25.83846 | 25.51051 | 25.46139 | 25.47383 | 25.46139 | 25.78207 | NaN      | NaN      | NaN      |
| 25.61526 | 26.05466 | 25.85757 | 25.59548 | 25.63755 | 26.05258 | NaN      | NaN      | NaN      |
| 26.00838 | 26.04218 | 25.95394 | 26.29614 | 26.28207 | 25.80193 | 24.46762 | 24.93607 | 25.03591 |
| 26.05879 | NaN      | 26.38443 | 26.2589  | 26.11942 | 26.22986 | 24.92705 | 25.02749 | 25.14102 |
| 24.92705 | 25.04843 | 24.71293 | 24.47383 | 24.50446 | 24.46762 | 24.83364 | 24.55801 | 24.6811  |
| 26.09346 | 24.63201 | 24.7543  | 24.317   | 25.87408 | 25.16806 | 25.57831 | 25.59833 | 25.83123 |
| 25.33415 | 25.55801 | 25.79699 | 25.18707 | 25.29614 | 25.52253 | 23.86703 | 25.68913 | 25.02749 |
| 24.43619 | 24.66492 | NaN      | 25.55801 | 25.75685 | 24.55215 | 26.64581 | 27.3662  | 26.60399 |
| NaN      | 24.43619 | NaN      | 24.7543  | NaN      | NaN      | 24.48616 | 24.82396 | 24.32389 |
| 22.52373 | NaN      | 22.9566  | 22.45513 | 22.68646 | 23.00024 | 23.97596 | 24.33756 | 23.48001 |
| 25.96279 | 26.64581 | 25.05258 | 25.34096 | 25.44884 | 25.45826 | 24.56964 | 24.1946  | 23.88577 |
| 23.59833 | 23.96719 | 24.21697 | 23.33756 | 23.62087 | 23.35111 | 24.42342 | 24.52253 | 24.239   |
| NaN      | NaN      | NaN      | 21.2535  | 22.70345 | NaN      | 23.88577 | 23.08537 | NaN      |

|          |          |          |          |          |          |          |          |          |
|----------|----------|----------|----------|----------|----------|----------|----------|----------|
| 24.6971  | 25.05672 | 23.91342 | 24.74407 | 24.33074 | 25.26069 | 26.33245 | 26.38278 | 26.38607 |
| 24.53445 | 24.64306 | 24.56384 | 24.98033 | 24.7543  | 24.74919 | 24.89041 | 24.51051 | 24.87643 |
| 26.21512 | 26.15267 | 26.06702 | 26.13124 | 26.28912 | 26.417   | NaN      | 25.80931 | 25.50446 |
| 25.56092 | 25.66221 | 25.6513  | 26.52103 | 26.60399 | 26.33586 | 27.38278 | 27.00838 | 27.22619 |
| 25.24627 | NaN      | 25.39754 | 25.75685 | 25.52253 | 25.59548 | 26.35616 | 26.47692 | 26.63201 |
| 24.98902 | 25.20583 | 25.57542 | 26.42502 | 26.14492 | 26.4008  | 26.2589  | 26.37617 | 26.71293 |
| 27.69312 | 27.79576 | 27.65949 | 27.94838 | 28.06085 | 27.80193 | 27.71293 | 27.20769 | 27.63893 |
| 27.43936 | 27.14102 | 27.50142 | 27.83846 | 28.04009 | 27.92025 | 28.37036 | 28.20769 | 28.59335 |
| 26.15267 | 26.46139 | 26.19272 | 26.19835 | 26.06702 | 26.2589  | 26.55508 | 26.5285  | 26.20396 |
| 24.65403 | 25.33756 | 24.64856 | 24.83364 | 25.33756 | 24.91342 | 24.52253 | 25.04843 | 24.66492 |
| 26.1946  | 26.09346 | 26.2535  | 26.10149 | 25.92931 | 25.94726 | 26.12731 | 26.39754 | 27.2803  |
| 26.54922 | 26.01265 | 26.87408 | 25.82153 | 25.12534 | 26.038   | 25.62366 | 25.54628 | 25.36119 |
| NaN      | 25.18707 | 24.79452 | 25.50446 | 25.62923 | 25.11347 | 25.29964 | 24.79452 | 26.0041  |
| NaN      | NaN      | NaN      | 23.83846 | NaN      | NaN      | 25.74407 | 26.08132 | 26.00838 |
| 25.88809 | 25.98468 | 25.87643 | 25.39428 | 25.62923 | 25.317   | 25.68646 | 25.391   | 25.34435 |
| 25.78457 | 24.89041 | 25.99118 | 26.99766 | 27.16997 | 27.28912 | 28.71947 | 28.57903 | 28.97049 |
| 23.63201 | NaN      | 24.06907 | 23.62087 | 24.1795  | 23.67573 | 24.26785 | 23.45513 | 23.28207 |
| 26.27498 | 26.88577 | 26.65949 | 27.12139 | 27.19835 | 26.98685 | 26.03381 | 26.0296  | 26.24627 |
| 24.87643 | 25.19084 | 25.09748 | 25.15267 | 25.317   | 25.48308 | 24.89966 | 24.89041 | 25.1332  |
| 26.36119 | 27.11148 | 27.13124 | 26.93157 | 26.56819 | 26.60399 | 23.11744 | NaN      | 22.95305 |
| 24.28912 | 23.65403 | 23.92252 | 24.04427 | 24.18707 | 24.39754 | 24.21697 | 24.42982 | 24.317   |
| 27.82639 | 28.00838 | 27.96499 | 28.24898 | 28.47073 | 28.29351 | 27.71293 | 27.80193 | 28.21234 |
| 24.57542 | 25.27142 | 24.09346 | 25.10949 | 24.94949 | 24.82396 | 25.12928 | 25.38113 | 24.99766 |
| NaN      | NaN      | NaN      | NaN      | NaN      | NaN      | 25.10149 | 24.99766 | 24.97158 |
| 25.1055  | 24.51653 | 24.83364 | 25.01052 | 25.11744 | 24.85757 | 24.96279 | 24.99335 | 24.92252 |
| 24.27498 | NaN      | 24.60399 | 24.6971  | 24.45513 | 24.49228 | 25.85757 | 25.2021  | 24.85757 |
| 25.78457 | 25.85281 | 25.32732 | 25.05672 | 25.42982 | 25.27498 | 25.62366 | 26.37855 | 25.50142 |
| 24.5285  | 24.1488  | 23.89504 | 24.28207 | 23.65403 | 23.62087 | 24.47383 | 24.00196 | 24.28207 |
| 24.7024  | 24.49228 | 24.2021  | 25.1055  | 24.58118 | 24.317   | 24.60399 | NaN      | 24.55215 |
| 26.37285 | 26.06702 | 26.15074 | 26.4567  | 26.15653 | 26.63201 | 25.56384 | 25.95615 | 25.68913 |
| 23.28207 | 24.6811  | 24.50446 | 24.21697 | 24.391   | NaN      | NaN      | NaN      | NaN      |
| 26.60399 | 26.21141 | 26.1776  | 25.72078 | 25.31008 | 26.1946  | 26.61807 | 25.97378 | 25.77957 |
| 25.04843 | NaN      | 24.76446 | 25.29263 | 25.68378 | 25.239   | 26.36286 | 26.35616 | 26.35951 |
| 24.92705 | 25.4008  | 24.96719 | 24.93157 | 24.94503 | 25.46762 | 23.84805 | 24.27498 | 23.72858 |
| 24.35783 | 24.28207 | 24.239   | 23.96719 | 24.15653 | 24.42982 | 24.42342 | 24.49228 | 23.83846 |
| 27.56092 | 28.15074 | 27.80193 | 27.18896 | 27.1795  | 27.05051 | NaN      | NaN      | NaN      |
| NaN      | NaN      | NaN      | 25.45826 | 24.38443 | 24.31008 | NaN      | NaN      | 23.24771 |
| NaN      | NaN      | 24.77455 | 24.98468 | 25.08942 | 25.26428 | 25.52552 | 24.1332  | 23.68646 |
| 25.86703 | 25.76699 | 26.1055  | 25.7415  | 25.95394 | 25.6971  | 25.56964 | 25.79947 | 25.45513 |
| 23.74919 | 25.1795  | 24.28912 | 24.01903 | 24.42342 | 25.14102 | 24.72338 | 24.81421 | 24.70767 |
| 26.57254 | 26.34266 | 26.60399 | 26.86231 | 26.47073 | 26.61807 | 26.04009 | 26.45199 | 26.22066 |
| 25.30661 | 24.78955 | 25.2856  | 25.38113 | 24.68646 | 25.67573 | 26.13124 | 25.03171 | 25.46139 |
| 25.76951 | 26.26607 | 26.00838 | 25.76446 | 25.56964 | 25.86703 | 24.66492 | 24.58118 | 24.5285  |
| 29.29351 | 29.258   | 29.59156 | 29.04531 | 28.82941 | 28.56092 | 28.09144 | 28.22159 | 28.57181 |
| 24.96279 | 25.44884 | 25.04843 | 25.56964 | 25.67034 | 25.6811  | 25.66492 | 25.73635 | 25.49228 |
| 24.43619 | 24.6971  | 23.96719 | 24.37119 | 24.45513 | 24.50446 | 24.10949 | NaN      | 24.17188 |
| 24.23169 | 24.24627 | 24.14102 | 24.44253 | 24.40406 | 24.391   | 24.58118 | 24.46139 | 24.62645 |
| 24.91342 | 24.37782 | NaN      | 24.51653 | 24.31008 | 24.6971  | 25.1488  | 25.317   | 25.23169 |
| 25.1332  | 25.2571  | 25.89504 | 25.02327 | 25.89966 | 25.91798 | 25.72858 | 25.50446 | 25.86467 |
| 28.42742 | 28.51277 | 28.4746  | 28.2535  | 28.22159 | 28.23991 | 29.94    | 29.95394 | 29.99496 |
| 26.72598 | 26.80193 | 26.47537 | 25.69975 | 25.92931 | 25.69179 | NaN      | NaN      | NaN      |
| 26.42021 | 26.46918 | 26.80193 | 26.07112 | 26.47537 | 26.18707 | 26.26428 | 26.48155 | 26.46139 |
| 26.36119 | 26.82639 | 26.67303 | 27.10149 | 27.04009 | 27.20769 | 26.1795  | 25.80686 | 26.2535  |
| 27.66628 | 27.98142 | 27.69312 | 28.10649 | 28.32817 | 28.37451 | 28.23535 | 28.07623 | 27.97049 |
| 25.86938 | 26.35783 | 26.12139 | 26.01052 | 26.02749 | 25.9157  | 25.73635 | 25.6811  | 25.80931 |
| 23.94056 | 24.10949 | 24.2535  | 24.35783 | 25.04009 | 24.239   | 24.417   | 24.85281 | 23.91342 |
| NaN      | NaN      | NaN      | NaN      | NaN      | NaN      | NaN      | NaN      | NaN      |
| 22.17646 | 20.5545  | NaN      | 23.56384 | 23.18404 | 22.11426 | 23.22729 | 23.60964 | 22.41957 |
| 28.16039 | 28.23535 | 28.52776 | 28.42742 | 28.36202 | 28.46684 | NaN      | NaN      | NaN      |
| 25.1757  | 25.62366 | 25.16423 | 24.95837 | 24.54038 | 24.35783 | 23.54038 | NaN      | NaN      |
| 24.58692 | 24.87643 | 24.6811  | 24.2021  | 24.10949 | 24.46139 | 23.80931 | 22.85186 | 24.04427 |
| 23.76951 | 24.10949 | 23.83846 | 24.1488  | 23.73892 | 24.39754 | 23.96719 | 24.41054 | 23.99335 |
| 24.51653 | 24.65403 | 24.74407 | 24.48001 | 24.70767 | 24.98033 | 23.68646 | 23.74919 | 23.93157 |
| 25.16423 | 24.96719 | 25.08942 | 24.40406 | 25.317   | 25.00196 | 24.41054 | 24.15653 | 24.5285  |
| NaN      | NaN      | 22.48493 | 23.40406 | NaN      | NaN      | NaN      | NaN      | 23.51653 |
| 24.82396 | 24.317   | 24.76446 | 24.417   | 24.64306 | 24.63201 | 23.77957 | 23.72858 | 23.28207 |
| 22.69922 | 21.93876 | 22.45764 | 22.66058 | NaN      | 22.41183 | NaN      | NaN      | 22.20658 |
| NaN      | NaN      | NaN      | NaN      | NaN      | NaN      | 24.83364 | 24.52253 | 25.59263 |
| 27.37451 | 27.49381 | 27.24445 | 26.65949 | 26.98685 | 27.08132 | 24.65403 | 25.2535  | 24.65949 |
| NaN      | NaN      | 23.78955 | 23.73892 | 23.49228 | 23.62087 | 23.98468 | 24.239   | 24.12534 |
| 22.90242 | 23.07398 | 23.14414 | 22.97246 | 23.19761 | 23.64306 | 22.34299 | 22.48738 | 22.23608 |
| 25.04009 | 24.76446 | 24.58692 | 24.43619 | 24.85757 | 24.37782 | NaN      | NaN      | NaN      |
| 23.65403 | 23.71816 | NaN      | NaN      | 23.06415 | NaN      | 23.33756 | 23.1673  | 23.1379  |
| 22.13634 | 22.1795  | 21.62756 | 22.2535  | 22.78955 | 21.83461 | 23.0559  | 22.61863 | 22.58003 |
| 24.65403 | 25.27142 | 24.71293 | 25.78955 | 25.6811  | 25.39754 | 23.82881 | 24.22435 | 24.33756 |
| 23.76951 | NaN      | 23.98468 | 23.26785 | 24.27498 | 24.1795  | 23.83846 | 23.88577 | 23.79947 |
| NaN      | NaN      | NaN      | NaN      | NaN      | NaN      | 23.37782 | NaN      | 23.96719 |
| NaN      | NaN      | NaN      | 23.10149 | 23.2535  | NaN      | 24.42982 | 25.09346 | 25.26069 |
| 25.51653 | 24.93607 | 25.55801 | 25.70767 | 25.28207 | 25.78207 | 25.69445 | 25.23169 | 25.19835 |
| 23.29614 | 23.74919 | 23.07071 | 22.83653 | 23.03758 | 22.67142 | 24.00196 | 24.02749 | 23.89504 |
| 25.66492 | 25.66221 | 26.46918 | 26.64581 | 26.69975 | 26.83846 | 26.12337 | 24.35783 | 25.9955  |
| 22.92071 | 23.17035 | 22.74098 | 23.35111 | 22.99162 | 23.31008 | NaN      | NaN      | 20.14569 |
| 24.49838 | 24.46139 | 24.60399 | 24.72858 | NaN      | 25.38113 | 25.37119 | 25.71293 | 25.61526 |
| 24.63755 | 22.82687 | 24.317   | NaN      | 24.56384 | 24.2021  | 24.26785 | 24.26069 | 24.1946  |
| 24.29614 | 24.56964 | 24.66492 | 24.2535  | 24.35111 | 24.46762 | 23.68646 | 23.88577 | 24.03591 |
| 25.2535  | NaN      | 24.98468 | NaN      | NaN      | NaN      | NaN      | NaN      | NaN      |
| NaN      | NaN      | 24.23169 | 24.06907 | 23.79947 | NaN      | NaN      | NaN      | NaN      |
| 25.23535 | 26.98685 | 25.64856 | 25.32732 | 25.08942 | 24.69179 | 24.88577 | 25.04843 | 24.80931 |

|          |          |          |          |          |          |          |          |          |
|----------|----------|----------|----------|----------|----------|----------|----------|----------|
| 25.96719 | 26.19272 | 25.71816 | 25.55801 | 25.86467 | 25.60399 | 26.75175 | 26.75175 | 26.48769 |
| 28.52776 | 24.35783 | 28.391   | 27.32389 | 25.99118 | 27.27142 | 28.01372 | 28.60399 | 27.4073  |
| 24.82396 | 24.23169 | 25.7543  | 24.01052 | NaN      | 23.79947 | NaN      | NaN      | NaN      |
| NaN      | NaN      | 21.82299 | NaN      | NaN      | NaN      | 25.239   | 25.08132 | 24.92252 |
| NaN      | NaN      | 22.95305 | NaN      | NaN      | NaN      | 24.01903 | 23.96719 | 24.06085 |
| 24.57542 | 24.72858 | 24.1488  | 24.51653 | 24.49838 | 24.55215 | 24.99766 | 24.8044  | 24.76446 |
| 23.66492 | 24.06907 | 24.00196 | 24.1795  | 24.47383 | 25.24627 | 24.18707 | 24.67034 | 24.48616 |
| 26.06085 | 26.1757  | 26.82639 | 26.85043 | 26.24264 | 26.51953 | 25.81176 | 25.96719 | 25.42021 |
| NaN      | NaN      | NaN      | NaN      | NaN      | NaN      | 24.39754 | 24.55801 | NaN      |
| NaN      | NaN      | NaN      | NaN      | NaN      | NaN      | 23.77957 | 23.54038 | 23.83846 |
| NaN      | NaN      | NaN      | NaN      | NaN      | NaN      | NaN      | NaN      | NaN      |
| 22.9812  | 24.07725 | 24.1488  | 24.72338 | 22.79352 | NaN      | 23.12534 | 24.62645 | NaN      |
| NaN      | 22.83074 | NaN      | 24.79947 | 22.93876 | NaN      | 21.79947 | 22.98815 | NaN      |
| 24.63201 | 24.46762 | 24.391   | 23.98468 | 23.0559  | 24.54628 | 22.38837 | 24.239   | 24.00196 |
| NaN      | NaN      | NaN      | NaN      | NaN      | NaN      | 25.50749 | 25.4073  | 25.36119 |
| NaN      | 21.97071 | 22.35111 | NaN      | NaN      | NaN      | 22.74919 | NaN      | 23.96719 |
| 24.1488  | 24.67573 | 23.68646 | 23.85757 | 24.54038 | 23.98468 | NaN      | NaN      | 24.07725 |
| NaN      | NaN      | NaN      | 23.46762 | 23.84805 | 23.65403 | 23.83846 | 22.92252 | 24.36453 |
| NaN      | NaN      | 25.80686 | 26.29964 | 26.18707 | NaN      | NaN      | 25.34096 | 26.4346  |
| 23.0426  | 23.75939 | 23.54038 | 23.95837 | 24.14102 | 23.23169 | 24.28912 | 24.85757 | 24.04427 |
| NaN      | NaN      | NaN      | 22.71398 | NaN      | NaN      | NaN      | NaN      | NaN      |
| 24.57542 | 24.31008 | 24.10949 | 24.317   | 24.18707 | 24.33756 | 25.27142 | 25.87643 | 25.39428 |
| NaN      | NaN      | NaN      | 24.05258 | 24.80931 | 27.0296  | 25.16039 | 24.18707 | 23.36453 |
| NaN      | NaN      | 25.36786 | NaN      | NaN      | NaN      | NaN      | NaN      | NaN      |
| 24.33756 | 25.2535  | 24.14102 | 24.46139 | 24.417   | 24.39754 | 23.93157 | 23.66492 | 24.46762 |
| 23.78955 | 24.93607 | 24.62645 | 25.02327 | 24.52253 | 24.42342 | NaN      | 24.90885 | 23.26785 |
| 27.69975 | 26.98685 | 27.32389 | 27.39917 | 27.13124 | 27.47073 | 27.31527 | 27.37451 | 27.46295 |
| 25.47692 | 25.48922 | 25.26785 | 25.76446 | 25.41054 | 25.32045 | 23.94949 | 24.96719 | 25.33415 |
| 22.48493 | 22.79947 | 22.239   | 22.23316 | 22.18858 | NaN      | 22.67573 | 22.82493 | 22.97771 |
| 23.85757 | 24.15653 | 23.73892 | 23.98468 | 24.15653 | 24.49228 | 24.97596 | 24.1488  | 24.17188 |
| 26.21141 | 25.86703 | 26.69975 | 26.11347 | 26.88577 | 26.51202 | 26.2732  | 26.47228 | 25.92252 |
| 23.55215 | NaN      | NaN      | NaN      | NaN      | 23.08861 | NaN      | 23.35111 | 23.86703 |
| NaN      | 24.38443 | 24.16423 | 24.15653 | 24.10949 | 24.06085 | NaN      | NaN      | NaN      |
| 24.35783 | 24.5285  | 24.48616 | 24.29614 | 24.417   | 24.77957 | 23.68646 | NaN      | 23.28207 |
| 27.24445 | 27.0296  | 27.35783 | 26.93157 | 26.52552 | 26.98685 | NaN      | NaN      | NaN      |
| 24.64856 | NaN      | 24.83846 | 24.58118 | 24.92252 | 24.67573 | 24.84805 | 25.51352 | 24.90426 |
| NaN      | 22.81714 | 23.22582 | 22.84805 | NaN      | NaN      | NaN      | NaN      | 22.39885 |
| 25.81176 | 26.29614 | 25.04843 | 25.63478 | 25.82396 | 26.25169 | 25.95837 | 25.68913 | 25.95172 |
| 24.69179 | 23.94056 | 25.36786 | 24.29614 | 23.66492 | 25.56964 | NaN      | 23.6971  | 23.07887 |
| NaN      | NaN      | NaN      | NaN      | NaN      | NaN      | 23.81909 | 23.80931 | 23.93157 |
| 26.1757  | 26.11744 | 26.02115 | 26.39264 | 26.50597 | 25.91342 | 25.73635 | 25.91798 | 26.61807 |
| 24.60399 | NaN      | 24.48616 | 24.23169 | 24.43619 | 24.45513 | 25.08132 | 24.85757 | 24.45513 |
| 26.77706 | 27.3662  | 26.82639 | 26.48308 | 26.52552 | 26.75175 | 26.4186  | 26.3662  | 26.0874  |
| 26.60399 | 25.98685 | 25.86231 | 26.28207 | 26.27675 | 26.05879 | 26.11744 | 25.87173 | 25.82881 |
| NaN      | 25.35111 | NaN      | 23.66492 | 24.37782 | 23.32389 | NaN      | 24.59263 | 23.28207 |
| 25.91798 | 24.48001 | 25.95172 | 25.98033 | 25.78457 | 26.22619 | 25.65676 | 25.26069 | 25.62645 |
| 23.93157 | 24.2021  | NaN      | 24.42982 | 24.55801 | 27.13124 | 24.6971  | 24.67034 | 24.21697 |
| 23.78955 | 24.38443 | 24.54038 | 25.81665 | 24.2021  | 25.1946  | 24.48616 | NaN      | 24.6811  |
| 23.55215 | 24.02749 | NaN      | 23.76951 | 23.20508 | 23.86703 | NaN      | 23.81909 | NaN      |
| 22.92615 | NaN      | NaN      | 23.46762 | 24.64306 | 23.5285  | 24.06085 | 22.70345 | NaN      |
| NaN      | 23.17798 | 23.31008 | 23.24336 | 23.42982 | 23.23608 | 22.86136 | NaN      | 22.97246 |
| NaN      | NaN      | NaN      | NaN      | NaN      | NaN      | NaN      | 24.54038 | NaN      |
| 23.97596 | NaN      | NaN      | NaN      | 23.90426 | 23.87643 | NaN      | NaN      | NaN      |
| NaN      | 23.90426 | 24.50446 | 23.81909 | 24.59833 | 24.77957 | 24.16423 | 24.96279 | 24.68646 |
| 23.92252 | NaN      | 24.2021  | 24.00196 | 24.06907 | NaN      | 24.05258 | NaN      | 23.94056 |
| 25.16039 | 24.58118 | 25.31008 | 23.83846 | 23.58692 | 23.65403 | 24.23169 | 23.95837 | 24.49838 |
| NaN      | NaN      | NaN      | NaN      | NaN      | NaN      | NaN      | NaN      | NaN      |
| 24.91798 | 25.42342 | 25.04843 | 25.239   | 25.00624 | 25.11744 | 25.29964 | 25.417   | 25.14102 |
| NaN      | NaN      | NaN      | 23.87643 | 24.47383 | 24.06907 | NaN      | NaN      | NaN      |
| 25.27853 | 25.36786 | 24.77455 | 24.36453 | 24.48616 | 23.86703 | 24.45513 | NaN      | NaN      |
| 23.49228 | 22.35917 | 24.30313 | 23.86703 | NaN      | 23.88577 | 25.33756 | 25.19084 | 24.93157 |
| 24.80931 | 22.49228 | NaN      | 25.06497 | 25.27853 | 25.35783 | 25.23169 | 25.43936 | 24.87173 |
| 22.44758 | NaN      | 21.60513 | 21.6231  | NaN      | 21.18858 | NaN      | NaN      | NaN      |
| 23.76951 | 24.41054 | 23.58692 | 24.04427 | 24.12534 | 23.80931 | 24.06907 | 24.98902 | 24.59263 |
| 22.80931 | 23.77957 | 22.81714 | 24.43619 | NaN      | NaN      | 22.84613 | 22.68859 | 22.9812  |
| 23.37782 | 24.2535  | 23.32389 | 23.94056 | NaN      | 24.08537 | 23.48001 | 23.31008 | 23.12218 |
| 24.00196 | 23.80931 | 24.12534 | 23.1488  | 24.05258 | 24.1946  | 25.14102 | 24.94503 | 24.73376 |
| 24.11744 | 24.48001 | 23.58692 | 23.89504 | 23.82881 | 24.28207 | 23.66492 | 22.23023 | 23.09828 |
| 26.86231 | 26.82639 | 26.96499 | 26.51202 | 26.54628 | 26.42021 | 26.67303 | 26.50597 | 26.98685 |
| 24.79452 | 24.90885 | 24.48001 | 25.23535 | 25.23169 | 25.42982 | 24.77455 | 25.10949 | 24.81421 |
| 26.45199 | 26.22986 | 26.48308 | 26.41377 | 26.20769 | 26.60399 | 25.35783 | 25.11347 | 25.7415  |
| 24.28207 | 24.73376 | 25.68646 | 24.95837 | 24.91342 | 24.98033 | 23.37782 | 25.18707 | 24.55215 |
| NaN      | NaN      | NaN      | 22.95305 | 24.10949 | 24.29614 | NaN      | NaN      | NaN      |
| 24.63755 | 24.83846 | 24.31008 | 24.49228 | 24.41054 | 24.37782 | 24.7024  | 24.37782 | 24.46762 |
| 22.49717 | 22.94235 | 21.79947 | 23.26785 | 22.66492 | 22.95127 | 22.5708  | 23.1931  | 23.19009 |
| 23.6971  | 23.97596 | 23.36453 | 23.91342 | 23.82881 | 23.90426 | 24.24627 | 23.92252 | 24.53445 |
| 25.17188 | 25.391   | 25.37782 | 24.8811  | 25.08942 | 24.76446 | 26.15074 | 25.69445 | 25.81909 |
| 24.27498 | 24.40406 | 24.92705 | 23.6971  | 23.77957 | 23.64306 | NaN      | NaN      | NaN      |
| 24.24627 | 24.26785 | 23.92252 | 24.01903 | 24.2021  | 23.58692 | 23.64306 | 23.55215 | 23.70767 |
| 23.29614 | 23.58692 | 22.95482 | 23.48001 | 23.56384 | 23.56384 | NaN      | NaN      | NaN      |
| 24.20955 | 24.43619 | 24.33074 | 24.17188 | 24.68646 | 24.5285  | NaN      | 23.391   | 23.33756 |
| 22.32389 | 22.29894 | NaN      | 22.16423 | 22.63423 | 22.35917 | 22.36185 | 22.49228 | NaN      |
| 24.71816 | 24.92705 | 24.24627 | 24.88577 | 24.22435 | 25.00624 | NaN      | NaN      | NaN      |
| 26.71293 | 26.81421 | 26.82639 | 26.27675 | 26.09748 | 26.29614 | NaN      | NaN      | NaN      |
| 24.7024  | 24.74919 | 24.75939 | 25.33756 | 25.00624 | 24.89504 | 24.66492 | NaN      | 24.5285  |
| 27.9428  | 28.15557 | 28.32817 | 27.98685 | 27.61807 | 28.12633 | 28.10149 | 28.19366 | 28.06599 |
| 26.11347 | 25.68378 | 26.44253 | 24.56964 | 25.51653 | 24.64306 | 26.72598 | 27.1795  | 27.2535  |
| NaN      | NaN      | NaN      | NaN      | NaN      | NaN      | 26.26249 | 26.64581 | 26.42822 |

|          |          |          |          |          |          |          |          |          |
|----------|----------|----------|----------|----------|----------|----------|----------|----------|
| NaN      | NaN      | NaN      | NaN      | NaN      | NaN      | 23.94056 | 23.78955 | NaN      |
| NaN      | NaN      | NaN      | NaN      | NaN      | NaN      | NaN      | NaN      | NaN      |
| 22.92796 | 23.26785 | 22.27923 | 23.59833 | 23.32389 | 23.417   | NaN      | 23.46762 | 23.94949 |
| 24.11744 | 24.08537 | 24.40406 | 24.08537 | 24.47383 | 23.89504 | 23.45513 | 24.06085 | 23.73892 |
| 30.27586 | 29.91171 | 30.47267 | 30.54812 | 30.40324 | 29.61807 | 30.44332 | 30.70471 | 30.39305 |
| 22.59149 | 22.49473 | 22.63201 | 22.52133 | 21.87643 | 22.28771 | NaN      | NaN      | NaN      |
| NaN      | NaN      | NaN      | 23.21401 | NaN      | NaN      | NaN      | NaN      | NaN      |
| 25.391   | 25.93382 | 25.76951 | 26.11545 | 25.61526 | 25.87173 | 24.28912 | 24.86231 | 24.239   |
| 25.7415  | 26.01478 | 25.34435 | 24.99766 | 25.05258 | 25.37782 | 25.91342 | 25.16806 | 25.83123 |
| 25.89735 | 25.89041 | 25.99981 | 27.01903 | 26.24082 | 26.61807 | 26.78955 | 26.71293 | 26.9428  |
| 26.06907 | 26.15074 | 26.34266 | 26.35616 | 26.50142 | 26.4073  | 26.61807 | 26.77706 | 27.21697 |
| 22.74098 | 22.83461 | 23.01563 | 23.29614 | 22.85377 | 23.68646 | 23.36453 | 23.40406 | 22.59377 |
| 23.88577 | NaN      | 23.77957 | 22.63644 | 23.88577 | 23.73892 | 23.77957 | 24.20955 | 23.20955 |
| 26.17188 | 25.97815 | 26.4073  | 24.82396 | 24.92252 | 24.33756 | 26.55362 | 26.44411 | 26.76446 |
| 26.07725 | 25.87643 | 25.90196 | 26.68646 | 26.38607 | 26.46295 | 26.87408 | 26.67303 | 26.82639 |
| NaN      | 25.4073  | 24.33756 | 24.73892 | NaN      | 24.18707 | 24.81909 | 25.47383 | NaN      |
| 24.89966 | 25.28912 | 24.82881 | 25.39428 | 25.27142 | 25.65403 | 25.54333 | 25.57254 | 25.36786 |
| 25.13712 | 25.43936 | 25.49228 | 24.84326 | 24.60399 | 24.87173 | 25.11744 | 25.85043 | 25.02327 |
| 26.10149 | 26.1546  | 26.09346 | 25.67034 | 25.65403 | 25.98468 | 24.60964 | 25.59833 | 24.7024  |
| 25.92931 | 26.07928 | 25.68913 | 26.87408 | 26.46607 | 26.58978 | 26.24082 | 26.05051 | 26.51352 |
| 24.52253 | 25.27498 | 24.91798 | 24.77957 | 24.51051 | 24.93157 | 24.87643 | 25.2856  | 24.87173 |
| 23.24627 | NaN      | NaN      | 22.53564 | 22.88948 | 23.20658 | NaN      | NaN      | 23.57542 |
| 27.58262 | 25.26785 | 27.22619 | 27.43141 | 27.47846 | 27.47846 | 27.29789 | 27.16039 | 27.19835 |
| 25.33756 | 24.71293 | 25.391   | 24.85757 | 24.98033 | 25.42982 | 25.72338 | 25.78457 | 25.87643 |
| 23.44253 | 23.91342 | 23.5285  | 23.48001 | 23.31008 | 23.81909 | 24.52253 | 24.46139 | 24.59833 |
| 26.47692 | 24.88577 | 26.52552 | 26.61807 | 26.24808 | 26.30661 | 25.61526 | 25.62923 | 25.27142 |
| 27.89157 | 27.5389  | 27.63893 | 27.2803  | 27.44727 | 27.48616 | 27.13124 | 27.38278 | 26.97596 |
| NaN      | NaN      | 23.48001 | NaN      | NaN      | 23.88577 | NaN      | 23.65403 | 24.11744 |
| 24.03591 | 24.6811  | 24.10149 | 24.00196 | 24.09346 | 23.75939 | 24.28207 | 24.239   | 24.33756 |
| 26.69975 | 26.43301 | 26.58978 | 26.40243 | 26.57109 | 26.82639 | 25.94949 | 26.4999  | 26.30138 |
| 26.71293 | 27.28912 | 26.85043 | 26.60399 | 26.80193 | 27.12139 | 26.10949 | 26.00196 | 25.94726 |
| 29.86673 | 29.0531  | 29.53705 | 29.82487 | 30.36202 | 30.14831 | 30.52028 | 30.36202 | 30.42342 |
| 24.1332  | 24.22435 | 23.84805 | 24.24627 | 24.26785 | 24.31008 | 24.33756 | 24.63201 | 24.37782 |
| 26.71293 | 27.97049 | 26.75175 | 26.65949 | 26.43619 | 26.88577 | 27.33245 | 26.64581 | 26.90885 |
| NaN      | NaN      | NaN      | 24.06907 | 23.81909 | 24.14102 | 24.41054 | 24.8811  | 24.46762 |
| 25.27498 | 25.8044  | 25.89735 | 24.72858 | 24.73892 | 24.66492 | 24.43619 | 24.72858 | 24.24627 |
| 27.01903 | 27.31527 | 26.81421 | 26.80193 | 26.80193 | 26.67303 | 26.75175 | 26.69975 | 26.86231 |
| 25.90196 | 25.77706 | 25.6513  | 25.98251 | 25.83123 | 25.79947 | 24.47383 | NaN      | 24.35783 |
| 26.17188 | 26.63201 | 26.06497 | 27.09144 | 26.9428  | 26.92025 | 27.16997 | 26.81421 | 26.98685 |
| NaN      | NaN      | NaN      | 22.19761 | NaN      | NaN      | NaN      | 23.67573 | 22.77957 |
| 23.07235 | NaN      | 25.11744 | 24.11744 | 24.46762 | NaN      | NaN      | NaN      | NaN      |
| NaN      | 23.75939 | 23.94056 | 23.54038 | NaN      | NaN      | 24.20955 | 23.60964 | 23.99335 |
| NaN      | NaN      | 21.8839  | 22.9812  | 22.95305 | 23.56384 | 23.96719 | 23.56384 | 23.86703 |
| 24.391   | 24.417   | 24.09346 | 23.98468 | 23.78955 | 23.98468 | 24.53445 | 23.73892 | 23.26785 |
| 25.06907 | 25.38772 | 25.47073 | 24.62087 | 24.85281 | 25.50749 | 24.42342 | 24.14102 | 24.42342 |
| NaN      | 23.89504 | 24.239   | 23.76951 | 23.97596 | NaN      | 25.32732 | NaN      | 26.37451 |
| NaN      | NaN      | NaN      | NaN      | NaN      | 21.80735 | NaN      | NaN      | NaN      |
| 24.43619 | NaN      | 24.60399 | 24.1488  | 24.26069 | 23.91342 | NaN      | NaN      | NaN      |
| 24.05258 | 24.51051 | 24.70767 | 23.93157 | 24.07725 | 24.22435 | NaN      | 24.39754 | 24.46139 |
| 24.78955 | 24.49228 | NaN      | NaN      | NaN      | 23.79947 | NaN      | NaN      | 23.13946 |
| 23.82881 | NaN      | 23.95837 | 24.07725 | 24.1488  | 23.85757 | 24.08537 | 24.07725 | 24.35111 |
| NaN      | 23.42982 | 23.0476  | 23.24627 | 23.40406 | 23.54038 | 22.9566  | NaN      | 22.80144 |
| 23.46762 | NaN      | 23.391   | 23.55215 | 23.55215 | 23.68646 | 24.1332  | NaN      | NaN      |
| 25.38443 | 25.19835 | 24.1488  | 24.65949 | 24.52253 | 25.08132 | NaN      | NaN      | NaN      |
| 23.01563 | 22.68432 | 21.43746 | 23.46762 | 23.12534 | 22.99335 | 22.09828 | 22.50446 | 22.34028 |
| NaN      | NaN      | NaN      | 23.2535  | 23.71816 | 23.417   | 24.04427 | 24.07725 | 23.77957 |
| 24.96279 | 25.48001 | 25.73117 | 25.52253 | 25.51051 | 25.56674 | NaN      | NaN      | NaN      |
| NaN      | NaN      | NaN      | NaN      | NaN      | NaN      | 24.92252 | 25.33074 | 25.13712 |
| 24.90885 | 24.71293 | 24.60399 | 24.74407 | 24.239   | 23.96719 | 25.33756 | 25.2571  | 25.02749 |
| 25.35783 | 25.31008 | 25.49534 | 25.60682 | 25.84566 | 25.79947 | 25.47692 | 25.49534 | 25.78706 |
| NaN      | NaN      | 23.49228 | NaN      | 23.66492 | NaN      | NaN      | NaN      | NaN      |
| 23.91342 | NaN      | 23.71816 | 23.81909 | 24.08537 | 24.44884 | 23.45513 | 23.32389 | NaN      |
| 23.46762 | NaN      | 23.417   | 23.391   | 23.45513 | 23.5285  | NaN      | 23.82881 | 23.65403 |
| 25.72078 | 24.317   | NaN      | 24.06907 | 25.05258 | 24.54038 | 23.0592  | 24.30313 | 23.29614 |
| 24.7024  | 24.64306 | 24.60399 | 24.75939 | 24.96279 | 24.1488  | 23.88577 | 23.84805 | 24.00196 |
| 24.74919 | NaN      | 24.32389 | NaN      | 23.37782 | 23.94056 | NaN      | 23.06579 | NaN      |
| 23.29614 | NaN      | 23.46762 | 22.96367 | 23.63201 | 23.48001 | 22.97771 | 23.29614 | NaN      |
| 27.23535 | 26.77706 | 27.32389 | 27.08132 | 26.83846 | 26.78955 | 25.64581 | 25.43619 | 25.42662 |
| NaN      | NaN      | NaN      | 24.34435 | 25.19084 | 25.19084 | 24.45513 | 25.47383 | 24.83846 |
| 22.81127 | NaN      | 23.01733 | 22.17646 | 23.1206  | 22.95482 | 22.97071 | 24.1795  | 23.21549 |
| NaN      | NaN      | NaN      | 22.82104 | NaN      | 22.76142 | 24.49228 | 24.33074 | 24.26069 |
| 25.23169 | 24.43619 | 26.07316 | 24.28207 | 24.28207 | NaN      | NaN      | 24.83846 | 24.09346 |
| NaN      | NaN      | 22.68432 | 22.74714 | NaN      | 23.33756 | NaN      | NaN      | 22.90793 |
| 22.86136 | NaN      | NaN      | NaN      | NaN      | NaN      | NaN      | NaN      | NaN      |
| 22.10789 | 22.23608 | 24.73892 | 24.39754 | 24.10149 | 24.57542 | 26.2571  | 27.15074 | 25.96939 |
| 26.52402 | 26.98685 | 27.21697 | 26.40568 | 26.81421 | 26.9428  | 26.54922 | 27.23535 | 26.77706 |
| 30.23078 | 30.33031 | 30.2535  | 29.34942 | 29.12139 | 29.32603 | 28.16997 | 28.14102 | 27.54628 |
| 24.05258 | 24.51051 | 24.54038 | 23.80931 | NaN      | NaN      | NaN      | NaN      | NaN      |
| 23.58692 | 23.75939 | 23.00539 | 23.83846 | 23.93157 | 23.79947 | NaN      | 22.76344 | 22.47507 |
| 27.0296  | 29.71129 | 26.36286 | 27.46295 | 26.92025 | 27.14102 | 27.11148 | 26.99766 | 27.19835 |
| 24.84326 | 24.20955 | NaN      | 24.23169 | NaN      | NaN      | 25.04009 | 24.91342 | 24.79452 |
| 23.31008 | 23.72858 | 23.23754 | 23.83846 | 23.49228 | 23.42982 | 23.48001 | 23.59833 | 23.67573 |
| 28.37036 | NaN      | 28.29351 | 26.44884 | 26.57542 | NaN      | 26.35951 | 26.46139 | NaN      |
| NaN      | NaN      | NaN      | NaN      | NaN      | NaN      | 25.71555 | 24.76446 | 25.37451 |
| 24.51653 | 24.93607 | 24.48616 | 24.56964 | 24.1795  | 24.6971  | 23.71816 | 23.07398 | 23.40406 |
| 23.37782 | 23.86703 | 22.89134 | 22.92615 | NaN      | 23.1673  | NaN      | NaN      | NaN      |
| 24.6811  | 25.22803 | 25.09748 | 25.23535 | 25.35783 | 25.31354 | 25.85519 | 25.78706 | 25.88344 |
| 25.46451 | 25.92479 | 25.39754 | 25.78706 | 25.92025 | 25.1795  | 26.55069 | 26.68646 | 25.87173 |

|          |          |          |          |          |          |          |          |          |
|----------|----------|----------|----------|----------|----------|----------|----------|----------|
| 24.91342 | NaN      | 24.1488  | 23.92252 | 24.12534 | 24.59263 | NaN      | NaN      | 24.26069 |
| 22.36453 | NaN      | 22.04593 | NaN      | NaN      | 23.16576 | NaN      | NaN      | NaN      |
| NaN      | 24.21697 | NaN      | NaN      | 25.96719 | NaN      | 26.82639 | 25.81665 | 26.17188 |
| 25.33415 | 23.80931 | 24.53445 | 24.56964 | 24.44253 | 25.04843 | 23.59833 | NaN      | NaN      |
| 23.86703 | 24.09346 | 23.40406 | 23.50446 | 23.68646 | 23.09184 | 24.2021  | 23.90426 | 24.93607 |
| NaN      | NaN      | 21.52133 | 21.84613 | NaN      | NaN      | 23.12534 | NaN      | 22.98989 |
| 25.80686 | 25.75685 | 26.18139 | 25.73635 | 25.44884 | 25.60682 | 25.48308 | 25.53445 | 25.63755 |
| NaN      | 24.85757 | NaN      | 23.84805 | 23.83846 | 23.6971  | NaN      | NaN      | NaN      |
| NaN      | NaN      | NaN      | NaN      | NaN      | NaN      | 24.16423 | 24.98468 | NaN      |
| 23.71816 | 23.75939 | 23.95837 | 23.76951 | 24.10149 | 24.1946  | 24.74919 | 24.98902 | 24.72338 |
| NaN      | NaN      | NaN      | NaN      | 24.32389 | 24.46762 | 25.53148 | 25.45513 | 25.65949 |
| NaN      | 23.84805 | NaN      | 23.98468 | 24.47383 | 24.76446 | 22.97421 | 23.391   | 23.64306 |
| 24.48616 | 24.51051 | 24.42982 | 24.34435 | 23.391   | 24.317   | 23.97596 | 24.05258 | 24.39754 |
| 23.97596 | 24.03591 | 23.2006  | 24.00196 | 24.17188 | 22.82299 | 24.1946  | 23.73892 | 24.68646 |
| 22.6584  | 23.33756 | 22.39885 | 23.42982 | 22.74919 | 22.88762 | NaN      | NaN      | 23.32389 |
| 22.95127 | 23.78955 | 23.63201 | 24.64856 | 23.65403 | 23.59833 | 22.53801 | 23.36453 | 23.49228 |
| NaN      | NaN      | NaN      | NaN      | NaN      | NaN      | 24.7543  | 25.14492 | 24.69179 |
| NaN      | 24.63755 | NaN      | 24.35783 | 24.79452 | NaN      | 24.97596 | 25.00624 | 25.19835 |
| NaN      | NaN      | NaN      | NaN      | NaN      | NaN      | 25.73635 | 26.76446 | 25.71293 |
| NaN      | NaN      | NaN      | NaN      | NaN      | NaN      | 23.64306 | 23.68646 | 23.66492 |
| NaN      | NaN      | NaN      | 21.47754 | NaN      | 23.82881 | 23.50446 | 23.12849 | 22.77354 |
| 24.1946  | 24.80931 | 24.09346 | 23.97596 | 23.77957 | 23.6971  | 22.37518 | 22.79749 | 23.59833 |
| 23.99335 | 24.46762 | 24.14102 | 24.36453 | 24.59263 | 24.47383 | 24.67573 | 24.48616 | 24.73376 |
| 24.5285  | 24.86231 | 24.48001 | 24.8811  | 24.82396 | 24.94503 | 24.35111 | 24.37119 | 24.76951 |
| 25.38443 | 24.52253 | 25.40406 | 25.43936 | 25.60399 | NaN      | 25.87173 | 26.16039 | 26.57254 |
| 22.47754 | 21.79551 | 22.58921 | NaN      | NaN      | 22.73892 | NaN      | NaN      | NaN      |
| 28.37036 | NaN      | 28.91741 | NaN      | NaN      | 28.55362 | 29.31743 | 28.48999 | 28.81115 |
| 24.84805 | 24.5285  | 24.93607 | 23.96719 | 24.32389 | 24.22435 | 23.75939 | 23.60964 | 24.33074 |
| 23.05258 | 23.74919 | 22.94949 | 23.49228 | 23.89504 | 24.04427 | 23.09507 | 22.42982 | 23.26785 |
| NaN      | NaN      | NaN      | NaN      | NaN      | NaN      | 23.66492 | 23.36453 | 22.98815 |
| NaN      | 24.24627 | 23.24771 | 24.31008 | 24.20955 | 24.38443 | 23.49228 | 23.86703 | 24.06085 |
| 23.26785 | 22.87455 | 23.2006  | 23.44253 | 23.391   | 23.1961  | NaN      | NaN      | NaN      |
| 25.92025 | 23.97596 | 25.66763 | 25.87643 | 26.46295 | 26.38772 | 25.87408 | 25.98251 | 26.06497 |
| NaN      | NaN      | NaN      | 23.50446 | 23.24916 | 23.18707 | 23.28207 | 24.01903 | 23.55215 |
| NaN      | NaN      | NaN      | NaN      | NaN      | NaN      | NaN      | 27.94838 | 27.99226 |
| NaN      | NaN      | NaN      | NaN      | NaN      | NaN      | 23.2535  | NaN      | NaN      |
| NaN      | 24.14102 | 24.1946  | 24.11744 | 24.45513 | 24.15653 | 24.65403 | 24.91342 | 24.42342 |
| 23.99335 | 24.23169 | 24.14102 | 22.88017 | 23.40406 | 23.37782 | NaN      | 23.99335 | 23.44253 |
| NaN      | NaN      | NaN      | 22.39624 | 22.239   | NaN      | 23.05755 | 22.92615 | 22.78157 |
| 24.78955 | 24.61526 | 24.77455 | 24.8044  | 24.2535  | 24.52253 | 25.24989 | 25.30661 | 25.16039 |
| 26.53148 | 27.37451 | 25.58118 | 25.37782 | NaN      | 24.94056 | 25.21697 | 25.06497 | 24.93607 |
| 24.8811  | 25.38113 | 26.24627 | 24.33074 | 24.2535  | NaN      | NaN      | NaN      | NaN      |
| NaN      | 25.4008  | NaN      | 24.96279 | 24.87173 | NaN      | NaN      | NaN      | NaN      |
| 25.76699 | NaN      | 25.26069 | NaN      | 25.50446 | NaN      | 25.04009 | 25.8044  | 25.32045 |
| 25.63201 | 25.32389 | 24.56384 | 25.30313 | 26.09144 | 25.39428 | 26.52552 | 26.71293 | 26.81421 |
| 25.27142 | 25.44569 | 25.12928 | 24.86231 | 25.04427 | 25.1488  | 24.51051 | 24.83846 | 24.49838 |
| 23.98468 | 25.08942 | 24.6971  | 24.04427 | 24.64306 | 24.85757 | 24.07725 | 24.391   | 24.06085 |
| 24.44884 | 23.83846 | 24.33756 | 25.2535  | 25.02749 | 25.2535  | 25.15653 | 24.73376 | 25.41377 |
| 24.04427 | 23.6971  | 24.00196 | 23.37782 | 23.07071 | 23.09184 | NaN      | NaN      | NaN      |
| 26.39917 | 26.1776  | 25.94503 | 25.76699 | 25.80931 | 26.01478 | 26.89735 | 26.57109 | 26.65949 |
| 22.74714 | NaN      | 23.50446 | 23.70767 | 23.65403 | 23.6971  | 23.89504 | 23.79947 | 23.6971  |
| NaN      | NaN      | NaN      | NaN      | NaN      | NaN      | NaN      | NaN      | NaN      |
| 23.66492 | 24.60399 | 24.16423 | 24.71293 | 23.90426 | 24.10149 | 23.19761 | 24.62087 | 23.18101 |
| 22.58463 | NaN      | 22.59605 | NaN      | 23.51653 | 23.26785 | 23.91342 | 23.74919 | 23.73892 |
| 24.78955 | 24.8044  | 24.26069 | 24.71816 | 24.33756 | 24.92705 | 24.98468 | NaN      | 24.7024  |
| 23.88577 | 24.09346 | 24.10949 | 23.12218 | 24.32389 | NaN      | 25.69179 | 24.49228 | 25.00624 |
| 26.04843 | NaN      | 26.4186  | 26.88577 | 26.27498 | 26.20023 | 26.05258 | 26.038   | 25.7543  |
| 25.88577 | 25.89735 | 25.67573 | 26.35111 | 25.56964 | 25.73117 | 24.87173 | 25.16039 | 24.85757 |
| 23.417   | 23.54038 | 23.417   | 23.21104 | 23.51653 | 23.44253 | 23.75939 | 23.57542 | 23.50446 |
| NaN      | 26.26428 | NaN      | 25.72338 | 26.1488  | NaN      | 26.02327 | 26.08942 | 26.40406 |
| 24.84805 | 25.16039 | 25.71816 | 25.02749 | 25.27498 | 25.42662 | 25.22066 | 24.49228 | 24.50446 |
| 24.64306 | NaN      | NaN      | 23.46762 | 22.89319 | NaN      | 23.87643 | 24.39754 | 24.56964 |
| 24.79947 | 24.45513 | 24.39754 | 24.18707 | 23.70767 | 24.03591 | 24.08537 | 24.07725 | 23.81909 |
| 24.49228 | 24.97158 | 25.08537 | 25.1488  | 25.27853 | 25.1332  | 25.19084 | 25.60116 | 25.15653 |
| 26.07521 | 25.73376 | 26.23169 | 24.12534 | 24.49838 | 25.49534 | 24.73892 | 25.19084 | 25.68646 |
| 24.54038 | 25.19084 | 24.89966 | 26.12928 | 25.83364 | 26.15267 | 26.35448 | 25.93382 | 26.24627 |
| 21.76344 | 22.1047  | 24.18707 | 24.18707 | 24.00196 | 24.01903 | 24.56964 | 24.52253 | 24.2021  |
| 25.01478 | 24.88577 | 21.9061  | 22.64306 | 22.1916  | 22.90242 | 22.60738 | NaN      | 22.72442 |
| NaN      | NaN      | 26.12139 | 25.93157 | 25.66221 | 25.29263 | NaN      | NaN      | NaN      |
| NaN      | NaN      | NaN      | NaN      | NaN      | NaN      | 24.88577 | NaN      | 24.391   |
| 24.51051 | 25.04843 | 24.91342 | 24.37119 | 24.62087 | 24.49228 | 24.91798 | 24.89966 | 24.71816 |
| 23.5285  | 23.45513 | NaN      | 22.20658 | NaN      | 23.92252 | 24.39754 | 25.16423 | 24.89041 |
| 24.45513 | NaN      | 24.34435 | NaN      | NaN      | NaN      | 25.67034 | 25.82396 | 25.89504 |
| 25.03591 | 24.96279 | 24.94056 | 25.32732 | 25.36453 | 25.16806 | 24.20955 | 24.74407 | 24.51653 |
| NaN      | 24.68646 | 24.98902 | 25.04009 | 25.417   | 25.42982 | 25.34435 | 25.20583 | 25.62645 |
| 23.58692 | 23.2535  | NaN      | 24.1946  | 23.57542 | 24.18707 | 25.77455 | 25.61526 | 26.29263 |
| NaN      | NaN      | 23.25205 | NaN      | NaN      | NaN      | 24.239   | 24.71293 | 24.06085 |
| 22.98989 | NaN      | 23.45513 | 23.77957 | NaN      | 21.76344 | NaN      | 23.73892 | NaN      |
| 24.47383 | 24.18707 | 24.74407 | 24.83364 | 25.38113 | 25.18707 | 24.24627 | 24.15653 | 24.21697 |
| 28.06085 | 27.78955 | 27.57542 | 27.93719 | 28.11644 | 27.71947 | 26.34773 | 26.73892 | 26.33756 |
| 24.95394 | 24.95837 | 24.87643 | 24.78457 | 24.95837 | 24.98033 | 24.79452 | 25.24989 | 25.18707 |
| 27.3662  | NaN      | 27.35783 | 26.81421 | 26.39264 | 27.09144 | 26.80193 | 27.92025 | 26.57542 |
| 25.76446 | 24.40406 | 25.60682 | 26.35111 | 26.82639 | 26.81421 | 27.00838 | 26.9428  | 27.27142 |
| 25.14492 | 24.98902 | 25.22066 | 25.09346 | 25.1332  | 25.29263 | 24.21697 | 23.57542 | 23.50446 |
| NaN      | 26.58978 | NaN      | 25.14102 | 25.2856  | 25.27142 | 25.92705 | 25.48001 | 25.61807 |
| 25.93832 | 26.87408 | 26.04218 | 26.48769 | 26.67303 | 26.26069 | 25.85281 | 25.92252 | 25.94949 |
| NaN      | NaN      | NaN      | NaN      | NaN      | NaN      | 24.1946  | NaN      | NaN      |
| 23.20359 | 23.28207 | NaN      | 23.84805 | 24.63755 | 24.18707 | 23.75939 | 23.391   | 22.98294 |

|          |          |          |          |          |          |          |          |          |
|----------|----------|----------|----------|----------|----------|----------|----------|----------|
| NaN      | NaN      | 23.29614 | 24.15653 | 24.06907 | 24.39754 | 24.65403 | 24.42342 | 24.04427 |
| 25.33074 | 24.95837 | 25.10149 | 25.87877 | 25.92479 | 26.10149 | 26.31181 | 26.24264 | 25.98033 |
| 24.96279 | 25.76951 | 25.63201 | 23.93157 | 23.99335 | 24.72338 | 23.29614 | 23.32389 | 23.24916 |
| 24.95837 | 25.32389 | 25.11744 | 24.83364 | 24.6971  | 24.85281 | 24.44884 | 24.2535  | 24.84805 |
| 25.08942 | 24.75939 | 24.51653 | 24.27498 | 24.417   | 24.44253 | 25.85757 | 25.43936 | 25.9157  |
| NaN      | NaN      | NaN      | NaN      | NaN      | NaN      | 24.37119 | NaN      | 24.54038 |
| 24.07725 | 23.94949 | 24.34435 | 25.62366 | 23.84805 | NaN      | 24.32389 | 24.23169 | NaN      |
| 26.07725 | 25.46139 | 26.15074 | 25.87877 | 25.92705 | 25.95837 | 25.09748 | 25.27498 | 25.08132 |
| 24.33756 | NaN      | 23.5285  | 23.391   | NaN      | 23.81909 | NaN      | NaN      | NaN      |
| 25.98685 | 25.06085 | 25.82881 | 25.65676 | 25.65676 | 25.82396 | NaN      | NaN      | NaN      |
| 23.68646 | NaN      | 24.239   | 24.29614 | 24.1488  | 24.20955 | 24.15653 | 23.97596 | 24.58118 |
| 25.01052 | 25.06907 | 25.19084 | 25.54333 | 25.19835 | 24.72338 | 25.07725 | 25.04843 | 25.12139 |
| 23.74919 | 23.93157 | 23.0625  | 22.42726 | NaN      | 23.2021  | 24.56964 | 26.49534 | 23.75939 |
| 23.81909 | 23.36453 | 23.49228 | 23.35111 | 22.76547 | 22.80931 | NaN      | NaN      | NaN      |
| NaN      | NaN      | NaN      | NaN      | NaN      | NaN      | 24.49838 | 24.55801 | 24.50446 |
| NaN      | 24.14102 | NaN      | NaN      | 23.82881 | 23.94949 | 25.01903 | 25.26428 | 24.75939 |
| 23.37782 | NaN      | 23.77957 | 24.1488  | 23.97596 | 24.37119 | 23.75939 | NaN      | NaN      |
| 25.73117 | NaN      | 25.81665 | 25.18329 | 25.11744 | 25.06907 | 24.40406 | 24.94949 | 24.96279 |
| 23.87643 | 24.20955 | 23.86703 | 24.61526 | 23.95837 | 24.49228 | 24.56384 | 24.34435 | 24.52253 |
| 22.239   | 24.44253 | 24.239   | 24.62087 | 24.14102 | 23.94056 | 24.83846 | 24.40406 | 25.29964 |
| 23.76951 | 23.89504 | 23.0258  | 24.317   | NaN      | 24.29614 | NaN      | 22.12376 | NaN      |
| 24.95394 | 24.91342 | 25.24264 | 25.20955 | 25.19835 | 24.81909 | 25.93382 | 25.15267 | 25.29614 |
| 24.39754 | 24.83364 | 23.81909 | NaN      | 24.18707 | 23.07561 | 24.74407 | 24.76446 | 24.60964 |
| NaN      | 23.78955 | NaN      | NaN      | NaN      | NaN      | NaN      | NaN      | 23.88577 |
| NaN      | NaN      | 23.28207 | NaN      | NaN      | NaN      | 24.1332  | NaN      | 22.97071 |
| 24.63201 | 24.91798 | 24.55801 | 24.98902 | 24.42342 | 24.84326 | 24.37782 | 24.05258 | 24.1332  |
| NaN      | NaN      | NaN      | NaN      | NaN      | NaN      | NaN      | NaN      | NaN      |
| NaN      | NaN      | NaN      | NaN      | NaN      | 23.55215 | 23.93157 | 23.81909 | 23.80931 |
| 23.81909 | 24.91342 | 24.2021  | 23.88577 | 24.98033 | 25.1488  | 23.95837 | 23.75939 | NaN      |
| 24.63755 | NaN      | 24.51051 | 24.57542 | 24.8044  | 24.85757 | 23.21697 | 23.08861 | 23.35111 |
| NaN      | NaN      | NaN      | NaN      | NaN      | 24.35783 | NaN      | NaN      | NaN      |
| 24.65403 | 25.1946  | 24.82396 | 25.54922 | 25.03171 | 25.2856  | NaN      | NaN      | NaN      |
| 25.38113 | 24.8811  | 25.28207 | 24.6811  | 22.68432 | 24.03591 | 24.6811  | 25.27142 | 24.68646 |
| NaN      | NaN      | NaN      | 20.70556 | NaN      | NaN      | NaN      | 24.10149 | 22.66492 |
| 22.31562 | NaN      | 22.40145 | 21.89134 | NaN      | 23.13006 | NaN      | 22.54038 | 22.6584  |
| NaN      | NaN      | 23.71816 | NaN      | NaN      | NaN      | NaN      | NaN      | NaN      |
| 26.98685 | 27.09144 | 26.76446 | 26.72598 | 26.55508 | 26.75175 | 27.06085 | 27.13124 | 27.1795  |
| 23.15808 | NaN      | NaN      | NaN      | NaN      | NaN      | 26.16423 | 22.39362 | 23.28207 |
| NaN      | 23.32389 | NaN      | NaN      | NaN      | NaN      | 22.33211 | NaN      | NaN      |
| NaN      | NaN      | 23.391   | 23.417   | 23.13946 | 23.59833 | 24.317   | 23.78955 | 23.63201 |
| NaN      | NaN      | NaN      | NaN      | NaN      | 22.93157 | NaN      | 22.27923 | NaN      |
| 23.89504 | NaN      | 23.55215 | 23.35111 | 23.83846 | NaN      | 23.81909 | NaN      | NaN      |
| NaN      | NaN      | 22.67788 | NaN      | NaN      | 23.6971  | NaN      | NaN      | NaN      |
| 24.34435 | NaN      | 24.6971  | 24.6971  | 24.33074 | 24.98033 | 24.06085 | NaN      | 24.17188 |
| 22.61414 | 23.42982 | 23.10789 | 23.63201 | 23.55215 | 23.28207 | 24.16423 | 23.89504 | 24.12534 |
| NaN      | 23.22582 | NaN      | NaN      | NaN      | NaN      | NaN      | NaN      | NaN      |
| NaN      | NaN      | NaN      | NaN      | NaN      | 24.34435 | NaN      | NaN      | NaN      |
| 23.2535  | 23.49228 | 23.28207 | 22.9812  | 22.97946 | 23.5285  | NaN      | NaN      | NaN      |
| NaN      | 23.73892 | NaN      | 23.82881 | NaN      | NaN      | NaN      | NaN      | NaN      |
| NaN      | 23.391   | NaN      | 23.49228 | 24.06085 | 23.36453 | 23.91342 | 22.43746 | NaN      |
| NaN      | NaN      | NaN      | NaN      | NaN      | NaN      | NaN      | NaN      | NaN      |
| NaN      | NaN      | 23.19009 | NaN      | 23.11585 | NaN      | NaN      | 23.71816 | 23.75939 |
| 22.46513 | 22.41442 | NaN      | 22.80931 | 23.03255 | 22.92976 | 22.67357 | 23.59833 | 23.23316 |
| 24.7543  | NaN      | 24.40406 | 24.1946  | 24.07725 | NaN      | NaN      | NaN      | 24.76951 |
| NaN      | NaN      | NaN      | 21.95305 | NaN      | 23.33756 | 23.32389 | 22.91159 | NaN      |
| 24.56964 | NaN      | 24.79452 | NaN      | NaN      | 25.13712 | 25.58118 | 25.55215 | 25.24989 |
| 23.49228 | 23.1931  | NaN      | 23.57542 | 22.94592 | 24.28207 | 23.59833 | 23.62087 | 23.45513 |
| 26.39917 | 27.07112 | 26.63201 | 26.78955 | 26.72598 | 26.73892 | 26.239   | 26.29439 | 26.13907 |
| 25.22803 | 24.89504 | NaN      | 24.76446 | 24.86231 | 25.21697 | NaN      | NaN      | 24.06085 |
| NaN      | NaN      | NaN      | NaN      | 23.33756 | NaN      | NaN      | 22.92976 | 22.73066 |
| 22.80735 | NaN      | 23.04926 | NaN      | NaN      | 23.02411 | NaN      | 22.58921 | 22.99852 |
| 25.42982 | 25.12534 | 25.18329 | 24.66492 | 24.54038 | 24.74919 | NaN      | NaN      | NaN      |
| NaN      | NaN      | NaN      | 23.57542 | 23.73892 | 23.33756 | 22.75124 | NaN      | 21.89874 |
| 23.58692 | NaN      | 23.5285  | 24.1946  | 23.66492 | 23.51653 | 24.15653 | 23.54038 | 24.09346 |
| NaN      | NaN      | NaN      | NaN      | NaN      | NaN      | NaN      | NaN      | NaN      |
| 21.81127 | NaN      | 20.95305 | 22.97421 | 22.13946 | 22.33756 | NaN      | NaN      | NaN      |
| 22.96543 | 23.2214  | 23.391   | 22.49228 | 22.36453 | 23.44253 | NaN      | NaN      | NaN      |
| 25.97815 | 24.62645 | 24.65403 | 24.2535  | 24.50446 | 24.22435 | 24.67034 | 26.35279 | 25.20955 |
| 23.92252 | 23.82881 | 23.417   | 23.85757 | 23.85757 | 24.60399 | 23.29614 | NaN      | NaN      |
| NaN      | NaN      | NaN      | NaN      | NaN      | 23.72858 | NaN      | NaN      | NaN      |
| 21.90242 | 22.87643 | 22.94414 | 22.94056 | 23.04093 | 22.87455 | 22.28489 | 23.33756 | 22.45513 |
| NaN      | NaN      | NaN      | NaN      | NaN      | NaN      | 25.14102 | NaN      | NaN      |
| 24.20955 | NaN      | 24.03591 | 24.34435 | 24.12534 | 24.05258 | 24.6811  | 24.97158 | 24.64306 |
| 24.21697 | 23.85757 | 23.49228 | 23.5285  | NaN      | 23.17798 | 22.74919 | 22.00539 | NaN      |
| 23.26785 | 24.94503 | 24.86231 | 23.75939 | 23.76951 | NaN      | 24.03591 | 24.16423 | 24.2021  |
| 24.94056 | NaN      | 24.74919 | 24.80931 | 24.82396 | 25.02749 | 23.88577 | 23.07235 | 23.73892 |
| 23.94949 | NaN      | 23.63201 | 23.40406 | 23.84805 | 23.80931 | 23.64306 | 23.46762 | 23.60964 |
| NaN      | 24.26069 | NaN      | 23.28207 | 23.1991  | 23.24045 | 22.63423 | 22.70978 | 22.77555 |
| 23.33756 | 23.45513 | 23.46762 | 23.60964 | 23.76951 | 23.48001 | 23.60964 | 24.15653 | 23.64306 |
| NaN      | NaN      | NaN      | 23.20508 | 23.93157 | NaN      | 23.66492 | 23.5285  | 22.47011 |
| 24.87173 | 25.24264 | 25.5285  | 27.45513 | 26.76446 | 25.56674 | 25.73376 | 25.10949 | 26.49686 |
| 27.56819 | 26.73892 | 26.89735 | 26.71293 | 26.81421 | 26.61807 | 27.30661 | 26.97596 | 27.06085 |
| 23.23169 | 24.06907 | 23.40406 | NaN      | NaN      | NaN      | NaN      | NaN      | NaN      |
| 23.74919 | 24.56964 | 24.35111 | 23.94056 | 23.86703 | 23.98468 | 23.391   | NaN      | 22.32937 |
| 22.63423 | 23.14414 | NaN      | 22.40145 | NaN      | 23.31008 | 22.3538  | NaN      | 22.05258 |
| 21.6971  | 24.84805 | 22.49717 | 25.1488  | 25.65676 | 24.10149 | 24.45513 | 26.34435 | 25.81176 |
| NaN      | NaN      | NaN      | NaN      | NaN      | 23.63201 | NaN      | NaN      | NaN      |
| 23.20359 | NaN      | 23.40406 | 23.79947 | 23.31008 | NaN      | NaN      | NaN      | 23.15499 |

|          |          |          |          |          |          |          |          |          |
|----------|----------|----------|----------|----------|----------|----------|----------|----------|
| NaN      | 23.51653 | NaN      | 23.1673  | 23.28207 | NaN      | 22.2764  | 23.44253 | 22.68217 |
| 26.89735 | 27.04009 | 26.89735 | 26.43141 | 26.31527 | 26.54185 | 26.90885 | 25.97158 | 26.54185 |
| NaN      | NaN      | NaN      | NaN      | NaN      | 22.7348  | 22.98468 | NaN      | 22.64306 |
| 22.32937 | NaN      | 22.00539 | 21.90976 | 21.89134 | 21.68859 | 21.9566  | NaN      | 22.61863 |
| 26.92025 | 24.7543  | 25.82639 | 25.97158 | 25.99981 | 25.60399 | 26.01478 | 25.62366 | 25.6811  |
| 24.09346 | NaN      | NaN      | NaN      | NaN      | NaN      | 21.30452 | 21.23608 | NaN      |
| 28.24898 | 28.5389  | 27.86231 | 28.13614 | 28.26696 | 28.2803  | 27.0296  | 27.61105 | 27.90311 |
| NaN      | 22.74919 | 22.26785 | 22.20658 | 22.71188 | 22.60964 | NaN      | NaN      | NaN      |
| 25.01903 | 25.54333 | 24.95837 | 24.60399 | 24.72338 | 24.34435 | 23.87643 | 24.26069 | 24.35783 |
| NaN      | 22.69498 | 23.03591 | 22.59149 | 22.64086 | 22.72234 | NaN      | NaN      | NaN      |
| 27.85043 | 28.3662  | 26.14492 | NaN      | NaN      | 26.63201 | 26.80193 | 28.16039 | 26.23535 |
| NaN      | NaN      | 21.27071 | NaN      | 22.51893 | 22.82493 | 23.09507 | 22.76142 | NaN      |
| 24.31008 | NaN      | 24.7024  | 24.96279 | 24.92705 | 25.16039 | 24.75939 | 25.06497 | 25.34773 |
| 21.89134 | NaN      | 22.3672  | 22.0426  | NaN      | 22.26499 | 22.27355 | NaN      | 22.3538  |
| NaN      | NaN      | NaN      | NaN      | NaN      | NaN      | 22.70345 | 23.12692 | 22.63865 |
| 23.48001 | NaN      | 23.28207 | 23.6971  | 23.48001 | 23.57542 | 23.31008 | 23.84805 | 22.98989 |
| NaN      | 24.391   | NaN      | 25.06497 | 25.01478 | 24.98902 | 23.71816 | 24.45513 | 24.02749 |
| NaN      | NaN      | NaN      | NaN      | NaN      | NaN      | 23.96719 | 23.77957 | 23.90426 |
| 24.16423 | 22.24771 | 24.89966 | 24.42982 | 24.71816 | 24.23169 | 25.02749 | 25.64306 | 25.09748 |
| 23.74919 | NaN      | NaN      | NaN      | 24.10949 | 23.91342 | 23.82881 | 23.2535  | 23.66492 |
| 23.74919 | 23.81909 | 23.417   | 23.90426 | 23.51653 | 23.71816 | 23.65403 | 23.33756 | 23.40406 |
| NaN      | NaN      | 23.45513 | NaN      | NaN      | NaN      | NaN      | NaN      | 23.75939 |
| NaN      | NaN      | NaN      | NaN      | NaN      | NaN      | 24.35111 | 25.80931 | 24.90426 |
| NaN      | NaN      | NaN      | NaN      | NaN      | NaN      | NaN      | NaN      | NaN      |
| NaN      | 23.33756 | 24.46139 | 23.50446 | 23.73892 | 23.44253 | 24.06907 | 23.86703 | NaN      |
| 22.20658 | 22.27355 | 22.1673  | 22.14258 | 22.18253 | 22.34841 | 22.67573 | 22.32937 | 22.1673  |
| NaN      | NaN      | NaN      | NaN      | NaN      | NaN      | NaN      | NaN      | NaN      |
| 23.97596 | 23.93157 | NaN      | 23.42982 | 23.44253 | 23.48001 | 24.22435 | 23.71816 | 23.76951 |
| NaN      | NaN      | NaN      | NaN      | NaN      | NaN      | 23.88577 | 23.85757 | 23.86703 |
| 23.6971  | 24.11744 | 23.95837 | 23.98468 | 24.49228 | 24.28912 | 22.58921 | 22.64746 | NaN      |
| 23.42982 | 23.71816 | 22.87079 | 23.48001 | 23.33756 | 23.62087 | 24.62645 | 24.90426 | 25.34435 |
| 23.87643 | 23.63201 | 22.89504 | 23.55215 | 23.59833 | 23.391   | 23.56384 | NaN      | 24.1795  |
| 22.46014 | NaN      | NaN      | NaN      | NaN      | NaN      | 24.05258 | 24.28912 | 24.36453 |
| 23.82881 | 23.64306 | 23.32389 | 23.90426 | 23.58692 | 24.20955 | 22.37252 | 24.46762 | 23.14569 |
| NaN      | NaN      | NaN      | NaN      | NaN      | NaN      | 23.11744 | 23.33756 | 23.33756 |
| 26.20023 | 25.78706 | 25.88809 | 26.24082 | 25.69445 | 27.46295 | 26.38278 | 26.96499 | 26.93157 |
| 24.98033 | 25.56964 | 24.83364 | 25.29964 | 25.2535  | 25.54333 | 24.57542 | 24.79947 | 25.14102 |
| 22.35649 | NaN      | 21.84995 | 21.97071 | 21.36986 | 21.9061  | NaN      | NaN      | 21.00881 |
| NaN      | 29.52776 | 28.81726 | 28.99766 | 28.96499 | 28.391   | 28.98685 | 28.78955 | 28.73247 |
| 24.2535  | NaN      | 24.60964 | 25.28912 | 24.54628 | 25.4008  | NaN      | 24.2021  | NaN      |
| NaN      | NaN      | NaN      | NaN      | NaN      | NaN      | NaN      | NaN      | 28.57542 |
| 23.0592  | 23.31008 | 23.04593 | 22.88577 | NaN      | 23.37782 | 22.76142 | 23.18101 | NaN      |
| NaN      | NaN      | NaN      | NaN      | NaN      | NaN      | NaN      | NaN      | 22.68217 |
| 25.38443 | 25.93607 | 25.2856  | 25.27142 | 25.26785 | 25.19835 | 25.70767 | 25.49838 | 25.51051 |
| NaN      | NaN      | NaN      | NaN      | 22.80144 | NaN      | NaN      | NaN      | 23.09184 |
| 24.44884 | 24.64856 | 24.26785 | 24.61526 | 24.81421 | 24.28912 | 24.77455 | 24.55215 | 24.46762 |
| NaN      | 22.30452 | 23.17493 | 23.42982 | 22.85186 | 22.73686 | 23.49228 | 23.86703 | 23.09989 |
| 24.37119 | 24.7543  | 24.65403 | 24.85757 | 25.06085 | 25.11347 | NaN      | NaN      | NaN      |
| 23.36453 | NaN      | 23.391   | 23.88577 | 23.66492 | 23.82881 | 23.2535  | NaN      | 23.08213 |
| NaN      | NaN      | NaN      | NaN      | NaN      | 22.73686 | 24.01903 | 23.6971  | 23.76951 |
| NaN      | 21.24191 | NaN      | 21.6584  | NaN      | NaN      | 21.73066 | 22.1916  | 22.1916  |
| NaN      | 23.58692 | 23.417   | 23.76951 | 22.56848 | NaN      | 22.91707 | NaN      | NaN      |
| NaN      | NaN      | NaN      | NaN      | NaN      | NaN      | 22.66058 | 22.98468 | 23.36453 |
| 25.46451 | 25.62087 | 25.00196 | 25.48001 | 24.97596 | 25.26428 | 24.46762 | 24.20955 | 24.417   |
| NaN      | NaN      | NaN      | NaN      | NaN      | NaN      | 22.1916  | NaN      | 24.09346 |
| 25.92025 | NaN      | 22.88017 | 25.13712 | NaN      | NaN      | 26.96499 | 25.47383 | 26.60399 |
| NaN      | NaN      | NaN      | NaN      | NaN      | NaN      | NaN      | NaN      | NaN      |
| NaN      | NaN      | NaN      | NaN      | NaN      | NaN      | NaN      | NaN      | NaN      |
| NaN      | NaN      | NaN      | NaN      | NaN      | NaN      | NaN      | NaN      | NaN      |
| NaN      | NaN      | NaN      | NaN      | NaN      | NaN      | NaN      | NaN      | NaN      |
| NaN      | NaN      | 24.8044  | 23.76951 | NaN      | NaN      | NaN      | NaN      | NaN      |
| 25.72338 | 24.97158 | 25.24627 | 24.68646 | 24.77455 | 25.08942 | 24.30313 | 24.01052 | 24.54038 |
| 25.27853 | 25.24989 | 25.08132 | 24.94056 | 24.96279 | 24.97596 | 25.34096 | 25.30313 | 25.45513 |
| 24.06085 | NaN      | 24.08537 | 25.09346 | 24.98033 | 24.58118 | NaN      | 24.64306 | 25.33756 |
| NaN      | NaN      | NaN      | NaN      | NaN      | NaN      | NaN      | 26.72598 | NaN      |
| 24.26785 | 24.60399 | 24.5285  | 24.33074 | 24.33756 | 24.32389 | 24.8811  | 24.87173 | 25.00624 |
| NaN      | NaN      | NaN      | NaN      | NaN      | NaN      | NaN      | 22.67788 | 22.04926 |
| 23.94949 | NaN      | NaN      | NaN      | NaN      | NaN      | 22.22729 | 23.92252 | NaN      |
| 23.73892 | 23.84805 | 23.78955 | 24.28912 | 23.75939 | 23.36453 | 24.98033 | 24.90885 | 24.73892 |
| NaN      | NaN      | NaN      | NaN      | NaN      | NaN      | NaN      | NaN      | NaN      |
| 24.2021  | NaN      | 24.22435 | 24.93157 | 24.1488  | 24.59263 | 23.72858 | NaN      | NaN      |
| 24.33756 | NaN      | 24.68646 | NaN      | 24.62645 | 25.90885 | NaN      | 24.06085 | NaN      |
| 23.04926 | 23.17493 | 23.2535  | 23.26785 | 22.92976 | 23.239   | NaN      | NaN      | NaN      |
| NaN      | NaN      | NaN      | NaN      | NaN      | NaN      | NaN      | 24.31008 | 23.6971  |
| NaN      | NaN      | NaN      | NaN      | NaN      | NaN      | NaN      | NaN      | NaN      |
| NaN      | NaN      | NaN      | NaN      | NaN      | NaN      | NaN      | NaN      | NaN      |
| NaN      | NaN      | NaN      | NaN      | NaN      | NaN      | NaN      | NaN      | NaN      |
| NaN      | NaN      | NaN      | NaN      | 22.99335 | 22.54274 | 23.68646 | 23.35111 | 24.01903 |
| 23.65403 | 24.02749 | 23.75939 | 23.55215 | 23.40406 | 23.26785 | 24.93157 | 25.08537 | 25.07725 |
| NaN      | NaN      | NaN      | 24.73376 | NaN      | NaN      | NaN      | NaN      | NaN      |
| NaN      | NaN      | NaN      | 22.39362 | 22.31562 | 22.5285  | 22.97421 | NaN      | 22.91889 |
| NaN      | NaN      | NaN      | 22.83653 | 22.50203 | 22.77555 | 23.23608 | 23.14569 | 23.18101 |
| NaN      | NaN      | NaN      | NaN      | NaN      | NaN      | NaN      | NaN      | NaN      |
| NaN      | NaN      | 24.01903 | NaN      | 23.35111 | 22.93517 | NaN      | NaN      | NaN      |
| 25.239   | 25.53148 | 25.42982 | 26.14686 | 25.92025 | 25.96279 | 26.30661 | 26.45199 | 26.06702 |
| NaN      | NaN      | NaN      | 22.29894 | NaN      | 21.86891 | 21.68003 | 21.38047 | NaN      |
| 25.91342 | 25.98685 | 25.77957 | 25.54922 | 25.68646 | 25.73635 | 24.18707 | 23.391   | 24.06085 |
| 27.51653 | 27.12139 | 27.30661 | 27.2535  | 27.12139 | 26.67303 | 27.05051 | 27.05051 | 27.39917 |
| 25.80193 | 25.71555 | NaN      | 25.76951 | 25.6971  | 26.26249 | 25.54038 | 25.42021 | 23.90426 |
| 22.85946 | 23.07887 | 22.58463 | 22.87267 | 22.8783  | NaN      | 22.51653 | 22.28489 | NaN      |

|          |          |          |          |          |          |          |          |          |
|----------|----------|----------|----------|----------|----------|----------|----------|----------|
| 25.72078 | 25.83364 | 25.99766 | 25.50142 | 25.95394 | 25.92025 | 26.1035  | 26.01052 | 25.77706 |
| 24.89504 | 24.54038 | 24.33756 | 24.45513 | 24.87173 | 24.10149 | 25.58118 | 24.99766 | 25.24627 |
| 24.06907 | NaN      | 24.35783 | NaN      | 23.417   | NaN      | NaN      | 23.12849 | 22.34571 |
| 23.50446 | 23.36453 | 23.40406 | 23.391   | 22.88762 | 22.96543 | NaN      | NaN      | NaN      |
| NaN      | NaN      | NaN      | NaN      | 24.96719 | 24.87643 | 24.93157 | 24.78955 | 25.26069 |
| NaN      | 24.59263 | NaN      | 22.63201 | NaN      | 26.13124 | NaN      | NaN      | NaN      |
| NaN      | 23.11267 | NaN      | NaN      | 21.36986 | NaN      | 23.04093 | 23.42982 | 23.26785 |
| 24.78457 | 24.87643 | 24.86703 | 24.35783 | 24.60964 | 24.15653 | NaN      | NaN      | NaN      |
| NaN      | NaN      | 23.97596 | 23.56384 | 24.11744 | 24.22435 | 24.35111 | 24.26069 | 24.1946  |
| NaN      | NaN      | NaN      | NaN      | NaN      | NaN      | 24.49228 | 24.391   | 24.01903 |
| 23.09184 | 23.29614 | 22.85377 | 23.09828 | 23.79947 | 23.80931 | 23.56384 | NaN      | 23.88577 |
| 22.98294 | NaN      | 22.97946 | 23.83846 | 23.32389 | 23.55215 | 24.03591 | 24.98468 | 24.06085 |
| NaN      | NaN      | NaN      | NaN      | NaN      | NaN      | NaN      | 24.10949 | 24.7024  |
| 22.87267 | NaN      | 23.84805 | NaN      | NaN      | NaN      | NaN      | NaN      | NaN      |
| 26.82639 | 26.77706 | 27.19835 | 27.28912 | 28.18423 | 27.88577 | 26.76446 | 27.509   | 26.49534 |
| NaN      | NaN      | NaN      | NaN      | NaN      | NaN      | 25.04009 | NaN      | NaN      |
| NaN      | NaN      | NaN      | NaN      | NaN      | NaN      | 25.96939 | 25.98033 | 26.20023 |
| 22.73686 | 23.42982 | 22.52133 | 23.31008 | 23.417   | NaN      | 21.8839  | 20.79551 | NaN      |
| 23.99335 | 24.2535  | 23.83846 | 24.17188 | 24.21697 | 24.56384 | 24.01052 | 24.16423 | 23.81909 |
| 24.23169 | 24.51051 | 24.62087 | 25.01052 | 25.39428 | 25.39754 | 24.91342 | 24.37119 | 24.46762 |
| NaN      | NaN      | NaN      | NaN      | NaN      | 22.83461 | 23.93157 | 23.54038 | 23.59833 |
| 24.78955 | 25.01903 | 24.54038 | 24.60964 | 24.54628 | NaN      | NaN      | 23.73892 | 24.64856 |
| 24.23169 | 22.31285 | 24.1488  | 22.24771 | 22.00539 | 23.44253 | NaN      | 23.51111 | 22.20658 |
| NaN      | 21.66275 | NaN      | NaN      | 20.76344 | NaN      | 23.04093 | 22.33211 | 23.04593 |
| 24.69179 | 24.27498 | 23.88577 | 23.66492 | 23.85757 | 24.05258 | 23.17188 | 23.99335 | 23.62087 |
| 22.78357 | 22.58233 | 22.18858 | 23.09507 | 22.65622 | 22.87267 | 24.59263 | 24.18707 | 23.42982 |
| NaN      | NaN      | 23.93157 | 24.12534 | 23.78955 | 23.44253 | 23.26785 | 23.26785 | 23.40406 |
| 23.37782 | NaN      | 23.0559  | 23.04427 | NaN      | NaN      | NaN      | NaN      | NaN      |
| NaN      | NaN      | NaN      | 24.98033 | 25.32732 | 24.76951 | NaN      | 24.84805 | 23.90426 |
| 23.57542 | NaN      | 23.23169 | 23.63201 | 23.62087 | 23.67573 | NaN      | NaN      | NaN      |
| NaN      | NaN      | NaN      | 23.11426 | 23.11267 | 23.1047  | NaN      | 23.46762 | 23.51653 |
| NaN      | NaN      | 23.75939 | 22.37518 | 23.23608 | 23.45513 | 23.71816 | 23.45513 | 23.5285  |
| 24.68646 | 25.15653 | 24.77957 | 24.99335 | 24.54038 | 24.28207 | 25.09346 | 24.89966 | 25.01903 |
| 23.93157 | 23.90426 | NaN      | 23.35111 | 23.46762 | 23.16423 | NaN      | NaN      | NaN      |
| 23.1031  | 24.87173 | 23.71816 | 24.10149 | 23.49228 | 23.97596 | 22.53801 | 24.10949 | 23.49228 |
| 25.56384 | 25.7024  | 25.69975 | 26.28912 | 26.38113 | 26.44253 | 26.39917 | 26.30835 | 26.60399 |
| 25.77455 | 24.56384 | 25.85757 | 25.07725 | 25.2856  | 25.56384 | 23.79947 | 23.84805 | 23.65403 |
| 24.07725 | NaN      | 22.80735 | 24.50446 | 24.35111 | 24.08537 | 24.22435 | 24.31008 | 24.08537 |
| 28.63547 | 25.02749 | 28.52402 | 28.08132 | 28.62506 | 28.10649 | NaN      | NaN      | NaN      |
| 25.7415  | 26.36953 | 25.2571  | 25.1946  | 24.82881 | 25.65949 | 25.27498 | 24.44884 | 25.06497 |
| NaN      | NaN      | NaN      | NaN      | NaN      | NaN      | 24.32389 | 24.34435 | 24.1795  |
| NaN      | NaN      | NaN      | NaN      | NaN      | 22.88762 | 25.239   | 24.22435 | 24.23169 |
| 24.89504 | 24.91798 | 24.96279 | 25.46139 | 25.90656 | 25.59548 | 26.36119 | 26.06085 | 26.33586 |
| NaN      | NaN      | NaN      | NaN      | 24.43619 | NaN      | 24.26069 | NaN      | 23.92252 |
| NaN      | 23.26785 | NaN      | NaN      | NaN      | NaN      | NaN      | NaN      | NaN      |
| 26.77706 | 26.57542 | 26.97596 | 26.80193 | 26.73892 | 26.38607 | 23.31008 | 23.32389 | NaN      |
| 26.75175 | 26.64581 | 25.94726 | 25.64581 | 25.39754 | 25.82881 | 26.19835 | 26.23352 | 25.87643 |
| NaN      | NaN      | NaN      | NaN      | NaN      | NaN      | NaN      | NaN      | NaN      |
| 25.29263 | NaN      | 25.37451 | 25.18707 | NaN      | NaN      | NaN      | NaN      | NaN      |
| 25.85994 | 26.20396 | 25.89735 | 26.90885 | 26.87408 | 26.63201 | 25.51352 | 25.07316 | 25.34773 |
| 24.57542 | 24.51653 | 24.83846 | 24.15653 | 24.38443 | 24.48616 | 24.77957 | 25.24989 | 24.89504 |
| 26.97596 | 26.71293 | 27.04009 | 26.9428  | 26.65949 | 26.52253 | 26.4999  | 25.39754 | 25.59263 |
| 23.92252 | 24.45513 | 23.80931 | 23.12692 | 22.68003 | 21.98468 | 22.83074 | 22.78756 | 22.87079 |
| 25.54333 | 25.66221 | 25.53148 | 25.36786 | NaN      | 25.00196 | NaN      | NaN      | NaN      |
| 28.87994 | 28.89735 | 29.14831 | 27.42342 | 27.58978 | 27.67976 | 26.85043 | 26.99766 | 26.78955 |
| NaN      | NaN      | 24.28912 | 23.36453 | 24.33074 | 24.58118 | 25.06497 | 25.317   | 25.00624 |
| NaN      | 23.20807 | NaN      | NaN      | NaN      | NaN      | 25.55801 | NaN      | 22.62979 |
| NaN      | NaN      | 23.11902 | 22.80538 | 23.73892 | 23.417   | NaN      | NaN      | 23.12218 |
| 24.83846 | 24.83364 | 24.76446 | 25.47692 | 25.48616 | 25.53445 | 25.79699 | 25.60964 | 25.82396 |
| 24.20955 | 23.51653 | 23.55215 | NaN      | 24.63201 | 23.64306 | 22.5545  | 23.58692 | 22.66492 |
| NaN      | 23.56384 | NaN      | 22.87455 | 22.93337 | 25.16039 | 22.09507 | 23.59833 | 23.391   |
| 24.06907 | 24.76446 | 24.46762 | 24.93607 | 24.74919 | 24.94949 | 23.44253 | 24.317   | 23.64306 |
| 24.86703 | 25.06497 | 24.99766 | 24.84326 | 24.86703 | 24.98468 | 25.49534 | 24.89504 | 25.44884 |
| 24.03591 | 23.90426 | 23.6971  | 23.64306 | 23.48001 | 23.19761 | 22.2214  | 22.11108 | NaN      |
| 25.01478 | 22.65185 | 24.89504 | 25.6513  | 25.88577 | 25.73376 | 26.07521 | 25.60116 | 25.94949 |
| 24.42342 | 25.78457 | 24.2535  | 24.09346 | 23.99335 | 23.97596 | 23.58692 | 23.26785 | 23.21401 |
| 22.37518 | 22.40925 | 22.04926 | NaN      | 22.09184 | 22.20359 | 22.18556 | 22.2535  | NaN      |
| 23.11744 | NaN      | NaN      | 22.98815 | NaN      | NaN      | 24.89504 | 24.23169 | NaN      |
| 22.99507 | NaN      | NaN      | NaN      | 22.52133 | NaN      | NaN      | NaN      | NaN      |
| 25.32732 | 25.48001 | 25.92025 | 25.18329 | 25.20955 | 25.58978 | 25.26069 | 25.08537 | 25.19835 |
| NaN      | NaN      | NaN      | 24.06907 | NaN      | 23.89504 | 23.59833 | 23.6971  | NaN      |
| 24.64856 | 24.71293 | 24.76446 | 24.23169 | 24.12534 | 24.46762 | 24.88577 | 24.37119 | 24.62087 |
| 24.1488  | 24.83364 | 23.85757 | NaN      | NaN      | NaN      | 25.44569 | 25.44884 | 25.05258 |
| NaN      | NaN      | NaN      | 24.94949 | 25.12534 | 25.08537 | 24.86231 | 25.29263 | 25.51051 |
| 24.77957 | 23.92252 | 24.57542 | 24.22435 | 24.02749 | 24.58692 | 24.37119 | 24.46139 | 23.33756 |
| NaN      | NaN      | NaN      | NaN      | NaN      | NaN      | 23.42982 | 24.64856 | 23.56384 |
| NaN      | NaN      | NaN      | 21.55918 | NaN      | NaN      | NaN      | NaN      | 22.40406 |
| 24.00196 | 22.85567 | 23.76951 | 23.71816 | NaN      | 23.54038 | 23.77957 | 23.50446 | 23.32389 |
| 22.43237 | NaN      | NaN      | 21.7265  | 22.47507 | 22.58003 | 21.22435 | 23.54038 | 23.56384 |
| 24.54628 | 23.77957 | 24.35783 | 25.71293 | 25.93607 | 26.26249 | 26.57398 | 27.07112 | 26.67303 |
| 21.3538  | 19.38785 | 21.59149 | 20.98815 | 21.86891 | 21.23608 | 23.87643 | 22.9566  | 24.72858 |
| 24.45513 | 24.04427 | 24.74407 | 24.42982 | 22.78756 | 24.84326 | 22.04593 | 24.68646 | 21.89134 |
| 24.58692 | 25.16806 | 24.417   | 25.04009 | 24.92252 | 24.71816 | NaN      | NaN      | NaN      |
| 22.38574 | NaN      | 20.53564 | NaN      | NaN      | NaN      | NaN      | NaN      | NaN      |
| 22.87643 | 23.391   | NaN      | 22.36185 | 22.25061 | NaN      | NaN      | NaN      | NaN      |
| 24.51051 | 23.70767 | NaN      | 24.239   | 24.68646 | NaN      | 24.46762 | 25.22803 | 25.24264 |
| 25.49534 | 25.89966 | 25.46451 | 25.06085 | 25.56964 | 25.35111 | 24.6811  | 25.29263 | 25.08132 |
| NaN      | NaN      | NaN      | NaN      | NaN      | NaN      | 23.96719 | NaN      | NaN      |





|          |          |          |          |          |          |          |          |          |
|----------|----------|----------|----------|----------|----------|----------|----------|----------|
| 25.07316 | 24.96719 | 23.70767 | NaN      | 23.67573 | 23.66492 | 24.30313 | 24.31008 | 24.28207 |
| 24.49838 | 23.46762 | 23.99335 | 23.79947 | 23.65403 | 22.77957 | 23.79947 | 23.42982 | 24.09346 |
| NaN      | 24.00196 | 23.80931 | 23.21993 | 23.97596 | 23.80931 | 24.64856 | 25.28912 | 24.71816 |
| 22.1519  | NaN      | NaN      | 22.6006  | NaN      | NaN      | NaN      | NaN      | NaN      |
| 24.41054 | NaN      | 24.08537 | NaN      | 22.70556 | NaN      | NaN      | 21.74304 | NaN      |
| NaN      | NaN      | NaN      | NaN      | NaN      | NaN      | 25.02749 | 25.28207 | 24.55215 |
| 28.87994 | 29.17712 | 28.84146 | 28.76762 | 28.83244 | NaN      | 29.1795  | 28.93719 | 28.86231 |
| 26.76446 | 26.44727 | 26.43619 | 26.07928 | 27.2535  | 27.07112 | 27.43936 | 27.67976 | 27.54628 |
| NaN      | NaN      | NaN      | NaN      | NaN      | NaN      | NaN      | NaN      | NaN      |
| NaN      | 22.18858 | 21.6584  | 22.09184 | 23.00881 | 22.63201 | NaN      | NaN      | NaN      |
| 23.73892 | 23.24916 | 22.84805 | 23.99335 | NaN      | NaN      | 24.27498 | 24.54038 | NaN      |
| NaN      | NaN      | NaN      | NaN      | NaN      | NaN      | 22.56384 | 22.69073 | 22.44506 |
| NaN      | NaN      | NaN      | NaN      | NaN      | NaN      | NaN      | NaN      | NaN      |
| NaN      | NaN      | 21.75124 | 22.18556 | 22.38047 | NaN      | NaN      | 22.56384 | 22.38574 |
| NaN      | NaN      | NaN      | NaN      | 22.70767 | 22.22729 | 22.36986 | 22.58003 | NaN      |
| 22.13634 | NaN      | 22.18556 | 21.83074 | 23.07071 | NaN      | 22.64966 | 22.33756 | 22.52612 |
| 25.89735 | NaN      | 25.61526 | 26.20023 | 26.12731 | 26.07928 | 25.50446 | NaN      | NaN      |
| NaN      | NaN      | NaN      | NaN      | NaN      | NaN      | NaN      | 22.40406 | 22.69285 |
| 21.26499 | NaN      | 21.98815 | 23.40406 | 21.51653 | NaN      | 23.40406 | 25.1332  | 23.35111 |
| 23.35111 | 23.01563 | 23.29614 | 23.57542 | 24.00196 | 24.16423 | 22.74714 | 23.00024 | 22.53564 |
| NaN      | NaN      | NaN      | NaN      | NaN      | NaN      | NaN      | 28.43141 | NaN      |
| 25.98033 | 26.08942 | 26.41216 | 26.1776  | 26.43141 | 26.61807 | 25.76699 | 25.74919 | 25.58118 |
| NaN      | NaN      | NaN      | NaN      | 22.79551 | NaN      | NaN      | NaN      | NaN      |
| NaN      | NaN      | 23.32389 | 23.36453 | 23.70767 | NaN      | 24.02749 | 23.93157 | NaN      |
| 22.08537 | 22.41442 | 21.88762 | 22.22729 | 21.48738 | 22.18253 | 22.32389 | NaN      | 22.0426  |
| NaN      | NaN      | NaN      | 23.51653 | 23.55215 | 23.44253 | 23.80931 | 23.28207 | 23.75939 |
| 23.28207 | 23.81909 | NaN      | 23.84805 | 23.64306 | 24.06085 | NaN      | 23.36453 | 23.85757 |
| NaN      | NaN      | NaN      | NaN      | NaN      | NaN      | NaN      | NaN      | NaN      |
| 23.51653 | 22.1047  | NaN      | 22.75939 | 23.40406 | 22.85946 | 23.46762 | 23.50446 | 23.391   |
| NaN      | 24.26069 | NaN      | 24.48001 | 24.32389 | 23.67573 | NaN      | 23.96719 | NaN      |
| NaN      | NaN      | 23.45513 | NaN      | NaN      | NaN      | NaN      | NaN      | NaN      |
| NaN      | NaN      | 23.26785 | NaN      | NaN      | NaN      | NaN      | NaN      | NaN      |
| 24.239   | 24.53445 | 24.28912 | 23.40406 | 23.73892 | 23.63201 | 22.73066 | 22.70556 | NaN      |
| 22.1795  | 21.92796 | 22.08213 | 22.68003 | NaN      | 22.1946  | NaN      | NaN      | NaN      |
| 26.38443 | 25.96279 | 26.39917 | 26.55362 | 26.44411 | 26.52552 | 25.42662 | 25.34773 | 25.28912 |
| 24.11744 | 24.47383 | 23.91342 | 24.42342 | 24.64856 | 23.99335 | 24.89966 | 25.26428 | 24.90885 |
| 26.2535  | 26.24264 | 26.2571  | 26.17379 | 26.09346 | 26.4186  | 27.89735 | 27.96499 | 27.76446 |
| 23.48001 | 23.78955 | 23.66492 | 23.74919 | 23.79947 | 23.84805 | NaN      | NaN      | NaN      |
| NaN      | NaN      | NaN      | NaN      | 24.09346 | NaN      | NaN      | NaN      | NaN      |
| NaN      | NaN      | 23.417   | 23.66492 | NaN      | NaN      | NaN      | NaN      | NaN      |
| NaN      | NaN      | 22.4996  | NaN      | NaN      | NaN      | NaN      | NaN      | NaN      |
| NaN      | NaN      | 21.66275 | NaN      | 22.13946 | NaN      | 22.39885 | 22.2006  | NaN      |
| NaN      | NaN      | 23.85757 | NaN      | NaN      | NaN      | 25.1332  | 24.91798 | 25.15267 |
| NaN      | NaN      | 22.91889 | 23.78955 | 23.59833 | NaN      | 24.08537 | 24.91798 | 24.52253 |
| 25.10949 | NaN      | 25.61807 | 26.22803 | 26.1055  | 26.18707 | 24.23169 | NaN      | 25.34773 |
| NaN      | NaN      | NaN      | NaN      | NaN      | NaN      | NaN      | NaN      | NaN      |
| NaN      | NaN      | NaN      | NaN      | NaN      | NaN      | NaN      | NaN      | NaN      |
| NaN      | NaN      | NaN      | 24.17188 | 24.23169 | NaN      | 24.38443 | 25.1757  | 25.53148 |
| 28.88867 | 29.104   | 28.95116 | 28.97596 | 29.08639 | 28.98685 | 28.43141 | 28.11644 | 28.58262 |
| NaN      | NaN      | NaN      | NaN      | NaN      | NaN      | NaN      | NaN      | NaN      |
| NaN      | NaN      | NaN      | NaN      | 23.14258 | NaN      | NaN      | NaN      | NaN      |
| NaN      | NaN      | NaN      | NaN      | NaN      | NaN      | NaN      | NaN      | NaN      |
| 26.2803  | 24.37782 | 25.80193 | 25.74919 | 25.89504 | 25.62366 | 25.46762 | 25.12928 | 25.29614 |
| NaN      | NaN      | NaN      | 23.54038 | NaN      | 23.42982 | 23.09184 | 23.1488  | 23.46762 |
| 25.81909 | 25.28207 | 25.56674 | 25.92025 | 25.7103  | 25.92479 | 26.1795  | 26.16231 | 26.2553  |
| 23.88577 | 24.2535  | 24.00196 | 23.23169 | 23.54038 | 23.55215 | 23.417   | 23.68646 | 23.45513 |
| 25.239   | 25.45826 | 24.79947 | 25.35111 | 25.16039 | 25.1055  | 24.93157 | 24.7024  | 24.21697 |
| 24.23169 | 24.70767 | 24.74919 | 24.1795  | 25.1055  | 24.21697 | NaN      | NaN      | NaN      |
| NaN      | NaN      | NaN      | NaN      | NaN      | NaN      | 25.97815 | 26.30661 | 25.89504 |
| NaN      | NaN      | NaN      | NaN      | 23.67573 | 23.36453 | NaN      | NaN      | NaN      |
| 23.6971  | NaN      | 23.42982 | 23.70767 | 23.58692 | 23.89504 | 26.11942 | 24.76446 | 24.85281 |
| NaN      | NaN      | NaN      | 22.67573 | 23.33756 | NaN      | 23.57542 | 23.26785 | 23.21104 |
| 23.87643 | NaN      | 23.60964 | 24.01903 | 24.04427 | 24.09346 | 23.83846 | 24.35783 | 23.96719 |
| NaN      | NaN      | NaN      | NaN      | NaN      | NaN      | 23.23608 | 22.97246 | 22.68432 |
| 25.60682 | 25.07725 | 23.74919 | 24.87643 | 24.77455 | 24.63755 | 23.89504 | NaN      | NaN      |
| 23.81909 | 24.62645 | 24.26069 | 24.37119 | 22.55684 | 24.59263 | 23.26785 | NaN      | 23.11426 |
| 23.67573 | 24.11744 | 22.93517 | 23.05755 | 23.42982 | 23.417   | 23.94056 | NaN      | 23.82881 |
| 26.90885 | NaN      | NaN      | NaN      | NaN      | NaN      | NaN      | NaN      | NaN      |
| 21.92071 | NaN      | 21.47259 | 21.97071 | 22.07235 | NaN      | NaN      | NaN      | NaN      |
| NaN      | NaN      | NaN      | NaN      | NaN      | NaN      | NaN      | NaN      | NaN      |
| 25.88344 | 25.6811  | 25.317   | 25.23535 | 25.08132 | 25.50142 | NaN      | 23.87643 | NaN      |
| 25.9955  | 26.54922 | 25.63201 | 25.53445 | 24.90426 | 25.22803 | 26.92025 | 26.95394 | 26.85043 |
| NaN      | NaN      | NaN      | NaN      | NaN      | 22.7265  | 23.80931 | 23.59833 | NaN      |
| NaN      | NaN      | 21.60964 | NaN      | NaN      | NaN      | 21.99507 | 22.8839  | NaN      |
| NaN      | NaN      | NaN      | NaN      | NaN      | NaN      | 21.6584  | NaN      | NaN      |
| NaN      | NaN      | 23.91342 | 24.67573 | 24.66492 | NaN      | 25.28207 | 25.41377 | 25.42342 |
| 25.85994 | NaN      | 26.65949 | 26.17188 | 25.91798 | 26.14686 | 26.20023 | 25.66763 | 26.67303 |
| 23.97596 | 24.03591 | 24.1488  | 25.12534 | 25.02327 | 25.20583 | 27.47073 | 27.48616 | 28.51277 |
| 24.38443 | 25.22066 | 24.66492 | NaN      | NaN      | NaN      | 25.23169 | 24.65949 | NaN      |
| NaN      | NaN      | NaN      | NaN      | 22.57542 | 22.46513 | NaN      | NaN      | NaN      |
| 25.34773 | 25.38443 | 24.75939 | 26.16231 | 26.1055  | 25.48308 | 25.08132 | 25.53445 | 25.13712 |
| 24.41054 | 24.12534 | 24.80931 | 25.1055  | 24.98902 | 25.58405 | 24.16423 | 24.91342 | 25.317   |
| NaN      | NaN      | 24.89504 | 25.33756 | NaN      | NaN      | 25.03171 | NaN      | NaN      |
| 23.49228 | 23.64306 | 23.28207 | NaN      | 22.92252 | NaN      | NaN      | NaN      | NaN      |
| NaN      | NaN      | NaN      | NaN      | 23.91342 | NaN      | NaN      | NaN      | NaN      |
| NaN      | NaN      | 22.64526 | NaN      | NaN      | NaN      | NaN      | NaN      | NaN      |
| 24.35111 | 23.36453 | 23.00024 | 23.391   | 23.391   | 23.32389 | 22.89504 | 22.70134 | 22.82687 |
| NaN      | 21.64526 | NaN      | 21.29894 | NaN      | NaN      | 21.81909 | 22.47507 | 22.25638 |

|          |          |          |          |          |          |          |          |          |
|----------|----------|----------|----------|----------|----------|----------|----------|----------|
| NaN      | NaN      | 21.26499 | NaN      | 23.90426 | NaN      | NaN      | NaN      | 23.21401 |
| 26.02538 | 26.14492 | 25.72338 | 25.71816 | 25.55801 | 25.86703 | 24.239   | 23.21697 | 24.21697 |
| NaN      | NaN      | 21.1332  | NaN      | NaN      | NaN      | 21.45262 | NaN      | 22.01563 |
| NaN      | NaN      | NaN      | NaN      | NaN      | NaN      | NaN      | NaN      | NaN      |
| 20.53564 | 21.52612 | 20.96719 | NaN      | 20.6006  | 20.67142 | 20.61863 | 21.89134 | 21.17035 |
| 25.15653 | 25.27142 | 25.35111 | 24.417   | 24.5285  | 24.58118 | 24.76951 | NaN      | 24.51653 |
| NaN      | NaN      | NaN      | NaN      | NaN      | NaN      | NaN      | NaN      | NaN      |
| 26.72598 | 26.73892 | 26.96499 | 27.28912 | 27.07112 | 27.20769 | 26.92025 | 26.65949 | 26.98685 |
| NaN      | NaN      | NaN      | NaN      | NaN      | NaN      | 22.7265  | NaN      | 22.87079 |
| NaN      | NaN      | NaN      | NaN      | NaN      | NaN      | 22.08861 | 22.94414 | NaN      |
| 23.73892 | NaN      | 23.90426 | 23.85757 | 24.21697 | 24.42342 | 23.99335 | 23.95837 | 23.76951 |
| 23.96719 | 24.21697 | 23.85757 | 23.79947 | NaN      | NaN      | 23.80931 | NaN      | 23.87643 |
| 24.39754 | 24.1946  | 23.49228 | 23.18556 | 23.58692 | NaN      | 23.21252 | 22.79947 | 22.61863 |
| 22.25926 | 22.97071 | 22.73892 | 22.8839  | 23.15345 | 22.74098 | NaN      | NaN      | NaN      |
| 23.62087 | 22.54038 | NaN      | 23.00367 | NaN      | NaN      | 23.66492 | 23.49228 | 22.88762 |
| 23.73892 | 23.18404 | 23.65403 | 23.60964 | 23.36453 | 23.80931 | 22.31008 | 24.2535  | 22.88762 |
| 24.06907 | 23.78955 | 22.65622 | 23.91342 | 23.90426 | 23.66492 | NaN      | 22.79947 | 22.74919 |
| NaN      | NaN      | NaN      | NaN      | NaN      | NaN      | NaN      | 22.41442 | NaN      |
| NaN      | NaN      | 23.88577 | NaN      | 24.07725 | 24.22435 | NaN      | NaN      | NaN      |
| NaN      | NaN      | NaN      | NaN      | NaN      | 22.41442 | NaN      | NaN      | NaN      |
| NaN      | 24.42342 | NaN      | 24.99766 | 24.90426 | NaN      | NaN      | NaN      | NaN      |
| 23.28207 | 23.32389 | 22.42726 | 20.32113 | NaN      | 22.1795  | NaN      | 22.26499 | 22.47754 |
| 23.391   | 22.99507 | NaN      | NaN      | NaN      | 23.70767 | 23.1031  | 23.42982 | 21.89134 |
| NaN      | NaN      | NaN      | 23.84805 | NaN      | NaN      | 23.26785 | NaN      | NaN      |
| NaN      | NaN      | NaN      | NaN      | NaN      | NaN      | 23.2535  | 22.74509 | 22.67357 |
| NaN      | 23.37782 | 22.47507 | 23.77957 | 23.59833 | 23.55215 | NaN      | 20.66275 | NaN      |
| 24.56964 | 24.97158 | 24.2535  | 24.37119 | 24.24627 | 24.39754 | 24.93157 | 24.62645 | 24.37782 |
| NaN      | NaN      | NaN      | 22.81909 | NaN      | 22.7265  | NaN      | NaN      | NaN      |
| NaN      | NaN      | NaN      | NaN      | NaN      | 21.25926 | NaN      | NaN      | NaN      |
| NaN      | 22.04926 | 20.1946  | 19.65927 | NaN      | NaN      | NaN      | NaN      | NaN      |
| 22.6231  | NaN      | 23.26785 | 23.81909 | 24.06085 | 23.44253 | NaN      | 22.92976 | 23.09184 |
| NaN      | 25.71555 | NaN      | 24.239   | NaN      | NaN      | NaN      | NaN      | NaN      |
| NaN      | NaN      | NaN      | 21.70556 | NaN      | NaN      | NaN      | NaN      | 22.77756 |
| 22.25638 | NaN      | NaN      | 22.58692 | 22.64526 | NaN      | NaN      | NaN      | NaN      |
| NaN      | NaN      | NaN      | NaN      | NaN      | NaN      | 20.62756 | NaN      | NaN      |
| NaN      | 24.2535  | NaN      | 24.32389 | NaN      | 24.72858 | 23.37782 | 24.37782 | NaN      |
| NaN      | NaN      | NaN      | NaN      | NaN      | NaN      | NaN      | NaN      | NaN      |
| NaN      | NaN      | NaN      | NaN      | NaN      | 22.62756 | NaN      | 23.98468 | NaN      |
| 24.02749 | 22.1795  | 22.44758 | 23.55215 | 21.54981 | 24.2535  | NaN      | NaN      | NaN      |
| 22.81519 | 22.54274 | NaN      | 22.14258 | 22.89504 | NaN      | NaN      | 22.74714 | NaN      |
| NaN      | 23.60964 | NaN      | 23.33756 | 23.36453 | 23.391   | NaN      | NaN      | NaN      |
| 22.417   | NaN      | NaN      | 22.1673  | NaN      | 22.32389 | 22.90242 | NaN      | 23.42982 |
| 24.50446 | 24.75939 | 24.65403 | 24.98468 | 25.03171 | 24.99766 | 25.37451 | 25.27498 | 25.44253 |
| 24.21697 | NaN      | 24.86703 | 24.07725 | NaN      | 24.04427 | NaN      | 25.22066 | 24.46139 |
| 31.70471 | 29.78019 | 31.84969 | 31.26472 | 30.21928 | 30.59335 | 27.509   | 30.52028 | 27.77077 |
| NaN      | 21.6006  | NaN      | NaN      | NaN      | NaN      | NaN      | 20.75532 | NaN      |
| NaN      | NaN      | NaN      | 22.58692 | NaN      | NaN      | 22.70767 | 22.61414 | 23.07887 |
| NaN      | 23.67573 | NaN      | 23.88577 | 24.23169 | 24.14102 | NaN      | 22.94949 | 22.58921 |
| NaN      | NaN      | NaN      | NaN      | NaN      | NaN      | NaN      | NaN      | NaN      |
| NaN      | NaN      | NaN      | NaN      | NaN      | NaN      | 22.62533 | NaN      | 22.32663 |
| NaN      | NaN      | 23.03926 | NaN      | 22.32389 | NaN      | NaN      | NaN      | NaN      |
| NaN      | NaN      | NaN      | 23.71816 | 23.2535  | NaN      | NaN      | 22.58233 | NaN      |
| 26.75175 | 25.89735 | 27.01903 | 26.47537 | 26.86231 | 26.97596 | 27.0296  | 27.29789 | 27.2535  |
| 23.77957 | 24.01052 | 23.29614 | 23.59833 | 23.29614 | 23.50446 | 23.74919 | 23.26785 | 23.03758 |
| NaN      | NaN      | NaN      | 22.09184 | NaN      | NaN      | NaN      | 23.40406 | NaN      |
| NaN      | 24.417   | 23.51653 | 23.74919 | 23.59833 | 21.0625  | 22.70556 | 21.97071 | 22.09507 |
| 23.60964 | NaN      | NaN      | NaN      | NaN      | 23.23608 | NaN      | NaN      | NaN      |
| NaN      | NaN      | NaN      | 21.60513 | 21.53564 | 21.5451  | 22.60738 | 23.28207 | 22.86514 |
| NaN      | 22.98815 | NaN      | 23.417   | 23.22876 | 23.33756 | NaN      | NaN      | NaN      |
| NaN      | NaN      | NaN      | NaN      | NaN      | NaN      | NaN      | NaN      | NaN      |
| 21.93876 | NaN      | 22.48001 | 21.21252 | 22.09507 | 22.57311 | NaN      | NaN      | NaN      |
| NaN      | NaN      | NaN      | NaN      | NaN      | NaN      | 23.09023 | 22.86136 | 22.91525 |
| NaN      | NaN      | NaN      | NaN      | NaN      | 22.91342 | 23.6971  | 23.86703 | 23.87643 |
| NaN      | NaN      | NaN      | NaN      | NaN      | NaN      | NaN      | NaN      | NaN      |
| 22.33756 | 22.20955 | 22.21549 | NaN      | 21.67573 | 21.54981 | 22.6006  | 22.47507 | NaN      |
| NaN      | 23.2535  | NaN      | NaN      | NaN      | NaN      | NaN      | NaN      | NaN      |
| NaN      | NaN      | NaN      | NaN      | NaN      | NaN      | NaN      | NaN      | NaN      |
| 23.37782 | 23.70767 | 22.99162 | 23.1931  | 23.02073 | 23.5285  | NaN      | NaN      | NaN      |
| 23.25061 | 23.11902 | NaN      | 23.24627 | 23.72858 | 23.89504 | 24.99335 | 25.06085 | 25.06907 |
| NaN      | NaN      | NaN      | NaN      | NaN      | NaN      | NaN      | NaN      | NaN      |
| NaN      | NaN      | NaN      | NaN      | NaN      | NaN      | NaN      | NaN      | NaN      |
| 24.37119 | NaN      | 24.65949 | 23.87643 | 23.65403 | 23.75939 | 23.83846 | 24.16423 | 23.31008 |
| NaN      | NaN      | NaN      | 24.44253 | 24.66492 | NaN      | NaN      | 24.57542 | 24.21697 |
| 23.37782 | 23.64306 | 23.28207 | NaN      | NaN      | 22.81323 | NaN      | NaN      | NaN      |
| 23.29614 | 23.31008 | 23.00539 | 22.86325 | 23.06415 | 22.62533 | NaN      | 23.15808 | 23.01223 |
| NaN      | NaN      | NaN      | NaN      | NaN      | 22.24771 | NaN      | NaN      | NaN      |
| 24.46762 | NaN      | 24.52253 | NaN      | NaN      | NaN      | NaN      | NaN      | NaN      |
| NaN      | NaN      | NaN      | NaN      | NaN      | NaN      | NaN      | NaN      | NaN      |
| 24.84805 | 24.80931 | 24.97596 | 25.02327 | 25.02327 | 24.98902 | 23.58692 | 23.79947 | 23.66492 |
| NaN      | NaN      | 22.18556 | 22.61639 | 22.80735 | 23.03086 | 23.15653 | 23.55215 | 23.09507 |
| 22.55918 | 23.00367 | 22.75328 | 22.37518 | NaN      | 22.25638 | 21.98468 | 21.53564 | 21.32113 |
| 23.37782 | 24.77455 | 23.14258 | 24.74919 | 25.05672 | 24.23169 | 24.08537 | 24.71293 | 24.69179 |
| 22.98989 | NaN      | NaN      | NaN      | NaN      | 22.62087 | 24.38443 | 22.07235 | 23.62087 |
| 23.32389 | 23.78955 | 23.44253 | 23.93157 | 23.92252 | 23.59833 | 23.67573 | 23.48001 | 23.15962 |
| NaN      | NaN      | NaN      | NaN      | NaN      | NaN      | NaN      | NaN      | NaN      |
| NaN      | NaN      | 22.03926 | NaN      | NaN      | 21.96367 | NaN      | NaN      | 22.56151 |
| NaN      | NaN      | NaN      | 22.88204 | NaN      | NaN      | 23.16269 | 23.40406 | 23.391   |
| 22.35111 | NaN      | 21.03591 | NaN      | NaN      | NaN      | 22.84613 | 22.84805 | 22.69285 |

|          |          |          |          |          |          |          |          |          |
|----------|----------|----------|----------|----------|----------|----------|----------|----------|
| NaN      | NaN      | 23.5285  | 24.35783 | 24.50446 | NaN      | 24.51051 | 24.72338 | 24.85281 |
| 23.29614 | 23.68646 | 23.58692 | 23.57542 | 23.04593 | NaN      | 22.53089 | 23.12692 | 23.33756 |
| NaN      | NaN      | 21.70556 | 22.0625  | NaN      | 21.88017 | NaN      | 22.18858 | 21.40145 |
| 23.57542 | 23.72858 | 23.83846 | 22.95837 | 22.79154 | 23.09989 | NaN      | 22.79749 | NaN      |
| NaN      | NaN      | NaN      | NaN      | NaN      | NaN      | NaN      | NaN      | NaN      |
| NaN      | NaN      | NaN      | 23.62087 | NaN      | NaN      | 24.391   | 24.26069 | 24.64856 |
| 22.90426 | 23.92252 | NaN      | 24.90426 | 23.66492 | 24.11744 | 21.61863 | 21.51171 | 21.79551 |
| NaN      | NaN      | NaN      | NaN      | NaN      | NaN      | NaN      | 22.75328 | NaN      |
| 23.01733 | 22.9968  | 22.96895 | NaN      | NaN      | NaN      | NaN      | NaN      | NaN      |
| NaN      | NaN      | NaN      | NaN      | NaN      | NaN      | 22.34841 | 23.14569 | 22.07235 |
| 30.58441 | 30.69644 | 31.08639 | 30.48232 | 29.21928 | 29.61982 | 28.50142 | 29.42142 | 27.83846 |
| NaN      | NaN      | NaN      | NaN      | NaN      | NaN      | NaN      | NaN      | NaN      |
| NaN      | NaN      | 22.47507 | NaN      | NaN      | 21.92071 | NaN      | NaN      | NaN      |
| 26.27142 | 26.16806 | 26.41054 | 26.54922 | 25.7024  | 25.80193 | 26.29614 | 25.47383 | 27.63201 |
| 23.391   | NaN      | 24.1795  | NaN      | NaN      | 24.55801 | NaN      | NaN      | NaN      |
| 23.09989 | 23.80931 | 23.07561 | 23.25205 | 23.32389 | 23.28207 | 23.07398 | 22.98815 | 23.0476  |
| NaN      | NaN      | 23.54038 | 23.72858 | 24.65403 | 24.27498 | NaN      | NaN      | 23.5285  |
| NaN      | NaN      | NaN      | NaN      | NaN      | NaN      | NaN      | NaN      | NaN      |
| NaN      | NaN      | NaN      | NaN      | NaN      | NaN      | NaN      | NaN      | NaN      |
| NaN      | NaN      | NaN      | NaN      | NaN      | NaN      | 26.04009 | NaN      | NaN      |
| 24.93157 | 23.42982 | 24.95837 | 24.03591 | 23.95837 | 24.08537 | 23.87643 | 22.84995 | 23.03926 |
| 22.2006  | 21.64966 | 21.70978 | 23.50446 | 22.66275 | 23.63201 | 21.53089 | 21.98815 | NaN      |
| 22.53801 | NaN      | NaN      | 21.09507 | NaN      | NaN      | NaN      | NaN      | NaN      |
| 23.04093 | 23.417   | 22.90426 | NaN      | 23.29614 | NaN      | 23.88577 | NaN      | 23.36453 |
| NaN      | NaN      | NaN      | NaN      | NaN      | 22.32389 | NaN      | NaN      | NaN      |
| 25.18707 | NaN      | NaN      | NaN      | NaN      | NaN      | NaN      | NaN      | 25.15267 |
| NaN      | NaN      | NaN      | NaN      | NaN      | NaN      | NaN      | NaN      | NaN      |
| 23.10949 | 23.37782 | 23.26785 | 22.77957 | 23.06085 | 24.01052 | 23.51653 | 23.5285  | 23.32389 |
| NaN      | NaN      | NaN      | NaN      | NaN      | NaN      | 23.86703 | 24.49838 | 23.26785 |
| 20.92434 | 22.1916  | 22.52612 | 21.8839  | 22.0426  | 21.8839  | NaN      | NaN      | 21.96014 |
| NaN      | NaN      | NaN      | NaN      | NaN      | 23.12376 | NaN      | NaN      | NaN      |
| NaN      | NaN      | NaN      | NaN      | NaN      | NaN      | NaN      | NaN      | NaN      |
| 24.20955 | 23.32389 | 24.48001 | 23.417   | 21.94235 | 22.09184 | 21.0426  | 22.28489 | 24.44884 |
| 27.26249 | 27.37451 | 27.07112 | 27.24445 | 27.16039 | 26.88577 | 24.72858 | 24.78955 | 24.8811  |
| 22.02242 | NaN      | 22.12692 | 21.80341 | 21.77153 | 21.92796 | 26.07521 | 25.64031 | 26.04218 |
| NaN      | 23.55215 | NaN      | 22.86325 | 22.86891 | 22.59377 | NaN      | NaN      | NaN      |
| NaN      | NaN      | NaN      | NaN      | NaN      | NaN      | 22.35111 | NaN      | NaN      |
| NaN      | NaN      | NaN      | NaN      | NaN      | NaN      | NaN      | NaN      | NaN      |
| NaN      | NaN      | NaN      | NaN      | 23.29614 | NaN      | NaN      | NaN      | NaN      |
| NaN      | 20.53564 | NaN      | NaN      | 19.44758 | NaN      | NaN      | 22.00881 | NaN      |
| NaN      | NaN      | NaN      | NaN      | NaN      | NaN      | 24.02749 | 23.70767 | 23.96719 |
| NaN      | NaN      | NaN      | 21.75939 | 21.68432 | 21.0559  | 23.21252 | 22.81519 | 23.10789 |
| NaN      | NaN      | 24.04427 | NaN      | NaN      | NaN      | NaN      | NaN      | NaN      |
| 24.29614 | 24.35783 | 24.54628 | 24.59263 | 24.45513 | 24.89041 | 24.2021  | 24.48616 | 24.39754 |
| 23.33756 | 23.46762 | 23.40406 | 23.45513 | 23.16883 | 23.2535  | 23.5285  | 23.1519  | 23.37782 |
| 23.26785 | NaN      | 22.79749 | NaN      | 22.417   | 22.97246 | 23.37782 | 22.83074 | NaN      |
| 23.04593 | 23.65403 | 23.49228 | 24.16423 | 24.33074 | 24.24627 | 24.21697 | 23.96719 | 23.70767 |
| NaN      | 23.65403 | NaN      | 23.92252 | 24.05258 | NaN      | 23.14258 | 23.42982 | 23.68646 |
| NaN      | NaN      | 21.18253 | NaN      | NaN      | NaN      | NaN      | NaN      | 20.91707 |
| 25.24627 | 25.59833 | 25.54038 | 24.98033 | 23.83846 | 25.1946  | 24.14102 | 24.48616 | 24.30313 |
| 22.73686 | 23.35111 | 23.51653 | 23.70767 | 22.73686 | 23.09989 | 20.53564 | 21.18858 | 21.33211 |
| 19.93157 | NaN      | 20.93876 | NaN      | 20.23023 | 20.9812  | 21.28771 | 22.68003 | NaN      |
| 22.2214  | NaN      | NaN      | NaN      | NaN      | NaN      | 22.79352 | NaN      | 23.70767 |
| NaN      | NaN      | NaN      | NaN      | NaN      | NaN      | NaN      | 22.68217 | NaN      |
| 24.98468 | 25.13712 | 25.00624 | 23.94949 | 23.86703 | 24.06907 | 22.68646 | 23.14414 | 22.25638 |
| NaN      | NaN      | NaN      | NaN      | NaN      | NaN      | NaN      | NaN      | NaN      |
| 24.89504 | 25.06085 | 24.97596 | 25.27142 | 24.67034 | 25.01478 | 25.45826 | 24.40406 | 25.1946  |
| 23.0258  | NaN      | NaN      | 23.18404 | NaN      | NaN      | NaN      | 23.5285  | NaN      |
| NaN      | NaN      | NaN      | NaN      | NaN      | 22.74304 | NaN      | NaN      | NaN      |
| NaN      | NaN      | NaN      | NaN      | NaN      | NaN      | NaN      | NaN      | NaN      |
| NaN      | NaN      | 19.67487 | 21.59605 | NaN      | 22.68859 | 19.98815 | 22.6006  | 21.94592 |
| NaN      | 23.01733 | 22.96543 | NaN      | NaN      | NaN      | 23.91342 | 23.92252 | 24.1488  |
| 23.5285  | 24.09346 | 24.06085 | 23.46762 | 23.31008 | 22.99335 | 23.85757 | 23.70767 | 23.75939 |
| NaN      | NaN      | NaN      | 23.29614 | NaN      | 24.50446 | NaN      | NaN      | NaN      |
| NaN      | NaN      | NaN      | 23.85757 | NaN      | NaN      | 24.41054 | 24.417   | NaN      |
| NaN      | NaN      | NaN      | NaN      | NaN      | NaN      | 23.05424 | NaN      | 22.78157 |
| NaN      | 22.84038 | NaN      | 22.44    | 23.01223 | NaN      | NaN      | 24.49838 | 22.84995 |
| 24.00196 | 24.44884 | 23.71816 | 23.18253 | 23.1961  | 23.45513 | 24.48001 | 24.55801 | 23.81909 |
| 27.29789 | 27.51653 | 27.49381 | 27.55362 | 27.509   | 27.67976 | 28.27586 | 27.95394 | 28.21234 |
| 22.63644 | 22.53326 | 23.37782 | 23.35111 | NaN      | NaN      | 23.1031  | 22.97946 | NaN      |
| 25.79452 | 24.98468 | 25.8044  | 24.8044  | 25.82881 | 25.62645 | 25.94726 | 25.41054 | 25.83605 |
| NaN      | NaN      | 23.55215 | 23.76951 | 23.73892 | NaN      | 23.11902 | 23.75939 | NaN      |
| NaN      | NaN      | NaN      | NaN      | NaN      | NaN      | 23.68646 | 23.55215 | 23.70767 |
| 22.98642 | 23.40406 | 22.98468 | 22.82881 | NaN      | 22.63201 | 22.69285 | NaN      | 22.46513 |
| NaN      | 22.09184 | NaN      | NaN      | NaN      | NaN      | NaN      | 22.55918 | NaN      |
| NaN      | 24.62645 | NaN      | 24.07725 | NaN      | NaN      | 24.54628 | NaN      | NaN      |
| NaN      | 21.77957 | 22.31838 | 21.89134 | NaN      | 21.86891 | NaN      | 21.70556 | NaN      |
| NaN      | NaN      | 27.27142 | 27.0296  | 27.63893 | 27.42342 | 25.95394 | 26.82639 | 26.01478 |
| NaN      | NaN      | NaN      | NaN      | NaN      | NaN      | NaN      | NaN      | 23.78955 |
| 24.49228 | 22.80931 | 24.33074 | 24.39754 | 24.35111 | 24.23169 | 24.08537 | 24.35111 | 25.86703 |
| 24.01052 | 24.05258 | 23.91342 | 23.6971  | 24.06085 | 24.29614 | NaN      | NaN      | NaN      |
| NaN      | 26.97596 | NaN      | NaN      | NaN      | NaN      | NaN      | NaN      | NaN      |
| NaN      | NaN      | NaN      | NaN      | NaN      | NaN      | 27.69975 | 27.23535 | 27.47846 |
| 25.27498 | NaN      | 24.85281 | NaN      | NaN      | NaN      | NaN      | NaN      | 25.87173 |
| NaN      | NaN      | NaN      | NaN      | NaN      | NaN      | NaN      | NaN      | 22.94592 |
| 29.14346 | 28.19835 | 29.61982 | 29.19366 | 28.55362 | 29.65096 | 28.63201 | 28.61105 | 29.48808 |
| 23.79947 | 24.48001 | 23.55215 | 24.34435 | 24.04427 | 24.28912 | 24.10149 | 23.50446 | 23.55215 |
| NaN      | 25.47692 | 25.11744 | 25.87173 | 25.53445 | 25.71555 | 24.05258 | NaN      | NaN      |

|          |          |          |          |          |          |          |          |          |
|----------|----------|----------|----------|----------|----------|----------|----------|----------|
| NaN      | NaN      | 21.86514 | NaN      | NaN      | 23.92252 | NaN      | NaN      | NaN      |
| NaN      | NaN      | NaN      | NaN      | NaN      | NaN      | 25.89966 | 25.55801 | 26.12337 |
| NaN      | NaN      | 21.75124 | 21.8423  | 22.20955 | 22.09828 | 22.97596 | 23.58692 | 23.76951 |
| 24.62087 | NaN      | 24.23169 | 24.59833 | 25.08942 | 25.44884 | 24.94503 | 25.71293 | 24.54038 |
| 21.89504 | 22.23316 | 21.90242 | 22.43237 | 21.83846 | NaN      | 21.55918 | 22.58003 | 21.51653 |
| NaN      | NaN      | NaN      | NaN      | NaN      | NaN      | NaN      | NaN      | NaN      |
| 23.64306 | 23.417   | 24.09346 | 23.17646 | 23.36453 | NaN      | 24.67034 | 24.80931 | 24.58692 |
| 23.86703 | 23.96719 | 24.42342 | 24.01903 | 23.71816 | 24.14102 | NaN      | NaN      | NaN      |
| NaN      | NaN      | NaN      | NaN      | NaN      | NaN      | 22.51412 | 23.23023 | 22.42726 |
| 25.20583 | NaN      | 25.06085 | 25.24627 | 24.72338 | 25.24627 | 22.42214 | NaN      | 23.91342 |
| 28.59335 | 26.21327 | 28.52402 | 28.98414 | 29.18896 | 29.1866  | 28.63547 | 29.00838 | 28.66966 |
| 23.36453 | NaN      | 23.06579 | 23.64306 | 23.68646 | 23.6971  | 23.64306 | 23.05755 | 23.14414 |
| 22.22435 | NaN      | 22.56151 | 22.42214 | 22.57542 | NaN      | 23.28207 | 23.29614 | 22.79154 |
| 26.32903 | 26.64581 | 26.22986 | 26.71293 | 26.55215 | 26.49228 | 24.10949 | 23.35111 | 23.417   |
| 24.01052 | NaN      | 23.97596 | 24.1795  | 24.04427 | 24.14102 | 24.21697 | 24.1795  | 24.11744 |
| NaN      | NaN      | NaN      | NaN      | NaN      | 23.88577 | 24.94503 | 24.417   | 24.5285  |
| NaN      | NaN      | NaN      | NaN      | NaN      | NaN      | 24.17188 | 24.08537 | 23.48001 |
| 25.35111 | NaN      | 25.65403 | 26.01691 | 26.01691 | 25.87643 | 25.53742 | 25.62087 | 25.37782 |
| 23.6971  | NaN      | 23.85757 | 23.67573 | 23.51653 | 23.62087 | NaN      | NaN      | NaN      |
| NaN      | NaN      | 20.1332  | 18.08472 | 24.97596 | 24.09346 | NaN      | 20.6971  | NaN      |
| NaN      | NaN      | NaN      | NaN      | NaN      | NaN      | NaN      | NaN      | NaN      |
| NaN      | NaN      | NaN      | NaN      | NaN      | NaN      | 24.01052 | NaN      | NaN      |
| 24.62087 | 24.55801 | 24.41054 | 24.35111 | 23.99335 | 24.26785 | 24.76951 | 24.63201 | 25.17188 |
| 22.17035 | 22.84613 | 22.94414 | 23.29614 | 23.40406 | 23.21549 | 20.36453 | 20.86514 | NaN      |
| 25.43301 | 25.60116 | NaN      | 26.38607 | NaN      | 25.03591 | 26.01478 | 25.26069 | 25.24989 |
| NaN      | NaN      | NaN      | 23.36453 | 23.80931 | 23.1488  | 24.24627 | 23.96719 | 24.02749 |
| NaN      | NaN      | 25.06497 | 25.49534 | 25.391   | 25.80931 | NaN      | NaN      | NaN      |
| 23.63201 | 24.08537 | 24.22435 | 24.44884 | 24.26785 | 24.33756 | 23.70767 | 23.57542 | 23.95837 |
| 24.38443 | 24.1488  | 24.07725 | 24.60399 | 25.05258 | 24.2535  | NaN      | NaN      | NaN      |
| 25.21327 | 25.45199 | 25.30313 | 25.12139 | 25.01478 | 25.36786 | 26.37617 | 26.09748 | 26.55801 |
| NaN      | NaN      | 22.31562 | 22.57311 | 22.47259 | NaN      | 22.72858 | 22.33756 | NaN      |
| NaN      | NaN      | NaN      | NaN      | NaN      | NaN      | NaN      | NaN      | NaN      |
| NaN      | NaN      | NaN      | 24.78457 | 25.99335 | 25.62366 | 23.66492 | NaN      | NaN      |
| NaN      | NaN      | NaN      | NaN      | 23.24336 | NaN      | NaN      | NaN      | NaN      |
| 23.5285  | 23.09346 | 23.36453 | NaN      | NaN      | NaN      | 22.65622 | 23.12849 | 22.63423 |
| 22.73892 | 23.2535  | 22.73273 | 21.99162 | NaN      | NaN      | 22.09507 | NaN      | 22.15499 |
| NaN      | NaN      | NaN      | NaN      | NaN      | NaN      | 21.92434 | NaN      | NaN      |
| 23.15962 | NaN      | 22.32937 | 23.1946  | 23.95837 | 23.31008 | NaN      | 21.79154 | NaN      |
| NaN      | NaN      | NaN      | NaN      | NaN      | NaN      | NaN      | NaN      | NaN      |
| 25.29263 | NaN      | 25.89966 | 24.50446 | 25.36453 | 25.21327 | NaN      | 23.56384 | NaN      |
| NaN      | 23.51653 | NaN      | NaN      | NaN      | NaN      | 23.0625  | 23.06415 | NaN      |
| 21.99852 | 22.9968  | 23.33756 | 23.35111 | 23.01052 | 22.95305 | 21.85757 | 22.31285 | 22.56384 |
| 23.36453 | 23.55215 | 23.46762 | 23.45513 | 23.54038 | 23.37782 | 23.54038 | NaN      | 23.80931 |
| 19.2764  | 20.81127 | 20.73066 | 21.99162 | 20.82687 | 21.56848 | 19.8469  | 22.31008 | NaN      |
| 23.19761 | NaN      | NaN      | NaN      | 23.35111 | 23.1795  | NaN      | NaN      | NaN      |
| 23.71816 | 23.66492 | 23.51653 | 23.01563 | 23.42982 | 22.92252 | 23.85757 | 23.0559  | 23.48001 |
| NaN      | NaN      | NaN      | NaN      | NaN      | NaN      | NaN      | NaN      | NaN      |
| NaN      | NaN      | NaN      | NaN      | NaN      | NaN      | NaN      | NaN      | 24.92252 |
| 22.84038 | 23.02749 | 23.04427 | 22.65185 | 22.72442 | 22.70556 | NaN      | NaN      | NaN      |
| NaN      | NaN      | NaN      | NaN      | NaN      | NaN      | NaN      | NaN      | 24.04427 |
| NaN      | NaN      | NaN      | NaN      | NaN      | NaN      | NaN      | NaN      | NaN      |
| 23.17188 | NaN      | 23.08213 | NaN      | 22.90426 | NaN      | NaN      | NaN      | NaN      |
| NaN      | NaN      | NaN      | NaN      | NaN      | NaN      | NaN      | NaN      | NaN      |
| 25.77706 | 25.89966 | 25.85757 | 26.57254 | NaN      | 26.31527 | 25.9428  | 25.74663 | 26.05051 |
| NaN      | NaN      | NaN      | NaN      | NaN      | NaN      | 26.11545 | 25.44569 | 27.14102 |
| 24.02749 | 24.27498 | 24.06907 | 24.32389 | 24.28912 | 24.51653 | 23.90426 | 23.54038 | 23.59833 |
| 23.48001 | NaN      | 23.86703 | 23.1332  | 23.21401 | 22.90426 | 23.48001 | 23.17341 | 23.18404 |
| NaN      | 21.7348  | NaN      | 22.27071 | 21.61863 | 21.39624 | NaN      | 21.53089 | 21.49228 |
| NaN      | 23.60964 | NaN      | 23.84805 | 24.60964 | NaN      | 22.35649 | NaN      | NaN      |
| 25.11744 | 25.18707 | 24.99766 | 25.70767 | 25.36786 | 25.30661 | 24.81421 | 23.24191 | 23.417   |
| NaN      | NaN      | NaN      | NaN      | NaN      | NaN      | 24.37782 | NaN      | NaN      |
| NaN      | NaN      | NaN      | NaN      | NaN      | NaN      | 25.28207 | 25.11744 | 25.29614 |
| NaN      | 24.77957 | NaN      | 24.98902 | 25.19084 | 23.13006 | 25.32389 | 25.58978 | 26.46762 |
| NaN      | NaN      | 23.50446 | NaN      | NaN      | 24.1795  | NaN      | NaN      | NaN      |
| 25.29263 | 25.60682 | 24.79947 | 24.91342 | NaN      | 24.72338 | 24.57542 | NaN      | 24.05258 |
| NaN      | NaN      | NaN      | NaN      | NaN      | NaN      | 24.54038 | 24.1795  | 24.09346 |
| NaN      | NaN      | NaN      | 22.89689 | 22.81323 | NaN      | NaN      | NaN      | NaN      |
| NaN      | NaN      | NaN      | 21.40145 | 21.29334 | NaN      | NaN      | 21.64966 | NaN      |
| NaN      | NaN      | NaN      | NaN      | NaN      | NaN      | 22.62087 | 23.20359 | 22.18858 |
| 22.65403 | 21.79947 | NaN      | 22.84995 | 24.10149 | NaN      | 22.73066 | 22.88204 | 22.75328 |
| NaN      | 24.20955 | NaN      | 22.85186 | 21.94949 | NaN      | 22.78556 | 23.83846 | NaN      |
| NaN      | 24.54628 | 21.83846 | NaN      | NaN      | NaN      | 22.68646 | 22.06579 | NaN      |
| NaN      | 22.31562 | NaN      | 20.36453 | NaN      | NaN      | NaN      | 21.86891 | NaN      |
| 22.07887 | 22.57542 | 22.08537 | 22.69285 | 22.02918 | 23.02242 | 22.67142 | 22.78955 | 22.07561 |
| NaN      | NaN      | NaN      | NaN      | NaN      | NaN      | NaN      | NaN      | NaN      |
| NaN      | NaN      | NaN      | NaN      | NaN      | NaN      | NaN      | NaN      | NaN      |
| NaN      | NaN      | NaN      | NaN      | NaN      | NaN      | NaN      | NaN      | NaN      |
| 24.48616 | 24.5285  | 24.92705 | 24.35783 | 24.26069 | 24.04427 | 25.19835 | 25.23535 | 25.58692 |
| NaN      | NaN      | NaN      | NaN      | NaN      | NaN      | 24.59833 | 24.16423 | 24.42982 |
| NaN      | 24.46762 | NaN      | 22.46264 | 22.29614 | NaN      | 21.9812  | 23.1031  | 22.20658 |
| NaN      | 24.94503 | NaN      | 24.34435 | NaN      | 24.73892 | 24.08537 | 23.85757 | NaN      |
| NaN      | NaN      | 23.09023 | NaN      | NaN      | NaN      | NaN      | NaN      | NaN      |
| NaN      | 21.5451  | NaN      | NaN      | NaN      | NaN      | NaN      | NaN      | NaN      |
| NaN      | NaN      | NaN      | NaN      | NaN      | NaN      | NaN      | NaN      | NaN      |
| 24.28912 | 24.41054 | NaN      | 24.39754 | 24.38443 | 24.46762 | 24.47383 | 24.59263 | 24.69179 |
| 24.00196 | 24.08537 | NaN      | 23.40406 | NaN      | 24.09346 | 23.50446 | NaN      | NaN      |
| 23.20508 | 23.03758 | 22.57542 | 23.2535  | NaN      | 23.24627 | 22.37782 | 22.76749 | 22.83653 |
| NaN      | NaN      | NaN      | NaN      | NaN      | NaN      | 23.02918 | 22.67357 | 22.51171 |



| LQF Intensity<br>PYMT RT1 | LQF Intensity<br>PYMT RT2 | LQF Intensity<br>PYMT RT3 | Protein IDs                       | Majority protein IDs  | Protein names                                  | Gene names |
|---------------------------|---------------------------|---------------------------|-----------------------------------|-----------------------|------------------------------------------------|------------|
| 33.13614                  | 33.18719                  | 33.21928                  | Q9JHU4;F6XZ84                     | Q9JHU4                | Cytoplasmic dynein 1 heavy chain 1             | Dync1h1    |
| 35.47327                  | 35.39241                  | 35.42405                  | Q8VDD5;Q5SV64;Q61879;F2Z494;Q8BX  | Q8VDD5                | Myosin-9                                       | Myh9       |
| 35.39879                  | 35.4427                   | 35.36006                  | E9PZ16                            | E9PZ16                | Basement membrane-specific heparan sulfat      | Hspg2      |
| 31.90455                  | 31.9574                   | 31.96774                  | Q9QXS1;E9Q3W4;F6R059;A0A0R4J218;  | Q9QXS1;E9Q3W4         | Plectin                                        | Plec       |
| 38.50468                  | 38.59432                  | 38.51206                  | A0A087WR50;Q3UHL6;A0A087W556;Q    | A0A087WR50;Q3UHL6;A   | Fibronectin                                    | Fn1        |
| 31.16039                  | 31.12386                  | 31.00838                  | E9Q616;G5E8K8                     | E9Q616                | AHNAK nucleoprotein (desmoyokin)               | Ahnak      |
| 31.13614                  | 31.23649                  | 31.20186                  | A0A286YDF5;Q69Z7N7;E9Q390;A0A286Y | A0A286YDF5;Q69Z7N7;E9 | Myoferlin                                      | Myof       |
| 33.07368                  | 33.09428                  | 33.06728                  | B7FAU9;Q8BTM8;B7FAV1;F6XC15;J3JS9 | B7FAU9;Q8BTM8;B7FAV1  | Filamin, alpha;Filamin-A;Filamin, alpha (Frag  | Flna       |
| 24.17188                  | 23.70767                  | 22.35111                  | E9PX70;Q60847;F6WIM8              | E9PX70;Q60847         | Collagen alpha-1(XII) chain                    | Col12a1    |
| 32.85155                  | 32.85712                  | 32.84782                  | Q55XR6;Q68FD5;F6Z1R4              | Q55XR6;Q68FD5         | Clathrin heavy chain;Clathrin heavy chain 1    | Cltc       |
| 31.77313                  | 31.84595                  | 31.81192                  | P19096;A0A0U1RNJ1;A0A0U1RPP5      | P19096;A0A0U1RNJ1     | Fatty acid synthase                            | Fasn       |
| 31.59779                  | 31.6501                   | 31.58441                  | Q80X90                            | Q80X90                | Filamin-B                                      | Flnb       |
| 31.41337                  | 31.45807                  | 31.42342                  | P26039;A2AIM2;F6S1V7;F6SX70       | P26039                | Talin-1                                        | Tln1       |
| 23.83846                  | 23.48001                  | 21.55918                  | Q01149;E0CX12                     | Q01149                | Collagen alpha-2(I) chain                      | Col1a2     |
| 30.4919                   | 30.57542                  | 30.48232                  | A0A0R4J0I9;Q91ZX7;Q3U5J2;D3Z5M3   | A0A0R4J0I9;Q91ZX7     | Low density lipoprotein receptor-related pr    | Lrp1       |
| 31.87188                  | 31.86821                  | 31.89735                  | Q9JKF1;A0A0U1RNG5;A0A0U1RPI2;A0A  | Q9JKF1                | Ras GTPase-activating-like protein IQGAP1      | Iqgap1     |
| 30.17236                  | 30.19601                  | 30.07368                  | A0A171EBL2;E9Q555;Q3U0U2          | A0A171EBL2;E9Q555     | E3 ubiquitin-protein ligase RNF213             | Rnf213     |
| 23.94056                  | 24.23169                  | 23.71816                  | MOQWP1;Z4YK85;A2ASQ1;Z4YJ55       | MOQWP1;Z4YK85;A2ASQ1  | Agrin                                          | Agrn       |
| 33.08322                  | 33.02333                  | 33.02828                  | P26041                            | P26041                | Moesin                                         | Msn        |
| 21.72234                  | 18.73066                  | 21.89134                  | P11087;CON_Q862S4;Q3U962          | P11087                | Collagen alpha-1(I) chain                      | Col1a1     |
| 33.82335                  | 33.83281                  | 33.74535                  | P11499;E9Q3D6;E9PX27;D3Z1R1;E9Q0  | P11499                | Heat shock protein HSP 90-beta                 | Hsp90ab1   |
| 32.91883                  | 32.91883                  | 32.95913                  | Q7TPR4;A1BN54;O88990              | Q7TPR4;A1BN54         | Alpha-actinin-1;Alpha actinin 1a               | Actn1      |
| 30.83846                  | 30.94                     | 30.95394                  | Q8CGC7;A0A0A6YWA4;A0A0A6YWH3      | Q8CGC7                | Bifunctional glutamate/proline--tRNA ligase    | Eprs       |
| 32.47266                  | 32.51559                  | 32.46782                  | F8WIT2                            | F8WIT2                | Annexin                                        | Anxa6      |
| 31.52496                  | 31.56184                  | 31.58441                  | Q64727;A0A286YDJ4                 | Q64727                | Vinculin                                       | Vcl        |
| 34.25491                  | 34.26192                  | 34.22647                  | P58252                            | P58252                | Elongation factor 2                            | Eef2       |
| 33.1916                   | 33.15436                  | 33.21784                  | Q01853                            | Q01853                | Transitional endoplasmic reticulum ATPase      | Vcp        |
| 30.82335                  | 30.84595                  | 30.77706                  | Q9EQK5                            | Q9EQK5                | Major vault protein                            | Mvp        |
| 33.01339                  | 33.01172                  | 32.93473                  | P08113;F7C312                     | P08113;F7C312         | Endoplasmic;Endoplasmic (Fragment)             | Hsp90b1    |
| 32.63071                  | 32.65438                  | 32.5527                   | P20152;A0A0A6YWC8;A2AKJ2;P31001;  | P20152;A0A0A6YWC8     | Vimentin                                       | Vim        |
| 32.65864                  | 32.69437                  | 32.56638                  | Q8VDN2;D3YNN7;Q6PIE5;Q91WH7;E9Q   | Q8VDN2                | Sodium/potassium-transporting ATPase sub       | Atp1a1     |
| 30.18423                  | 30.28692                  | 30.24218                  | E9QAI5;B2RQC6;G3UWN2;E9QAT6;F6S   | E9QAI5;B2RQC6;G3UWN2  | CAD protein                                    | Cad        |
| 25.83605                  | 26.34435                  | 26.35783                  | F2Z4A3;A0A087WRT4;A0A11LSQU7      | F2Z4A3;A0A087WRT4;A0  | FAT atypical cadherin 1                        | Fat1       |
| 29.509                    | 29.55728                  | 29.55728                  | Q8VHX6                            | Q8VHX6                | Filamin-C                                      | Flnc       |
| 30.7211                   | 30.65438                  | 30.90455                  | P14873;A2ARP8;Q9QYR6              | P14873                | Microtubule-associated protein 1B              | Map1b      |
| 33.07368                  | 33.02993                  | 32.96258                  | P20029                            | P20029                | 78 kDa glucose-regulated protein               | Hspa5      |
| 30.96774                  | 30.6372                   | 30.89735                  | A2A863;A2A864                     | A2A863;A2A864         | Integrin beta-4;Integrin beta                  | Itgb4      |
| 30.64581                  | 30.68813                  | 30.7211                   | G3X9T8;G3X8Q5;G3UXG1;G3UWP5;G3    | G3X9T8;G3X8Q5         | Ceruloplasmin                                  | Cp         |
| 31.2135                   | 31.31959                  | 31.23649                  | Q9WU78                            | Q9WU78                | Programmed cell death 6-interacting protein    | Pdc6ip     |
| 30.72923                  | 30.74535                  | 30.7211                   | Q9WTI7;Q5ND45                     | Q9WTI7                | Unconventional myosin-1c                       | Myo1c      |
| 36.0852                   | 36.11846                  | 36.09113                  | P07356;B0V2N5;B0V2N7;B0V2N8;REV   | P07356;B0V2N5;B0V2N7  | Annexin A2;Annexin (Fragment)                  | Anxa2      |
| 33.11458                  | 33.10992                  | 33.06246                  | P27773;F6Q404                     | P27773                | Protein disulfide-isomerase A3                 | Pdia3      |
| 31.04791                  | 31.08639                  | 31.08639                  | P35441;E9PWF0;Q05895              | P35441                | Thrombospondin-1                               | Thbs1      |
| 34.83752                  | 34.67871                  | 34.64151                  | P52480;A0A11LSU37;A0A11LSQV8;A0A  | P52480                | Pyruvate kinase PKM                            | Pkm        |
| 29.7357                   | 29.77863                  | 29.80039                  | B2RXS4;Q9QZC2;Q3UWH9;Q8CJH3       | B2RXS4                | Plexin-B2                                      | Plxn2      |
| 32.42342                  | 32.40831                  | 32.33031                  | P63038;D3Z2F2;D3Z7J9              | P63038                | 60 kDa heat shock protein, mitochondrial       | Hspd1      |
| 32.29789                  | 32.22216                  | 32.19894                  | P09103;E9Q8G8                     | P09103                | Protein disulfide-isomerase                    | P4hb       |
| 30.47267                  | 30.54812                  | 30.4334                   | Q3V117;Q91V92;Q3TS02              | Q3V117;Q91V92         | ATP-citrate synthase                           | Acly       |
| 30.87555                  | 30.80809                  | 30.81574                  | E9Q5G3;A0A11LSRP4                 | E9Q5G3;A0A11LSRP4     | Kinesin-like protein KIF23;Kinesin-like protei | Kif23      |
| 33.31689                  | 33.30334                  | 33.26192                  | P63017;Q504P4;D3Z5E2              | P63017;Q504P4         | Heat shock cognate 71 kDa protein              | Hspa8      |
| 30.91883                  | 30.92592                  | 30.98142                  | Q8BHN3                            | Q8BHN3                | Neutral alpha-glucosidase AB                   | Ganab      |
| 30.00838                  | 30.09899                  | 30.08639                  | Q8BMJ2                            | Q8BMJ2                | Leucine--tRNA ligase, cytoplasmic              | Lars       |
| 35.98269                  | 35.9656                   | 35.93077                  | P48036;A0A0G2JGQ0                 | P48036                | Annexin A5                                     | Anxa5      |
| 27.98142                  | 28.02433                  | 28.20303                  | A2AN08;F6S5P6;Z4YMA7;Z4YLP1       | A2AN08                | E3 ubiquitin-protein ligase UBR4               | Ubr4       |
| 32.57542                  | 32.66501                  | 32.62636                  | Q35639;Q3TET3;A0A0G2JGL7;A0A0G2J  | Q35639                | Annexin A3                                     | Anxa3      |
| 29.89591                  | 29.96774                  | 29.94                     | Q8VDM4;E9Q2S8                     | Q8VDM4                | 26S proteasome non-ATPase regulatory sub       | Psm2       |
| 31.98482                  | 32.04791                  | 31.9746                   | P07901;B7ZC50;A2A6A2;B7ZC49       | P07901                | Heat shock protein HSP 90-alpha                | Hsp90aa1   |
| 29.94                     | 29.98142                  | 30.11148                  | Q61768;E9QAK5;P33175              | Q61768;E9QAK5         | Kinesin-1 heavy chain;Kinesin-like protein (F  | Kif5b      |
| 30.67976                  | 30.66289                  | 30.64581                  | O55143;Q8R429;B1AT55;B1AT55;E9Q5  | O55143                | Sarcoplasmic/endoplasmic reticulum calcium     | Atp2a2     |
| 34.98057                  | 34.91972                  | 34.89284                  | P10107;E9QAQ7;A2B840              | P10107                | Annexin A1                                     | Anxa1      |
| 30.91883                  | 30.9746                   | 30.93298                  | P42932;H3BL49;H3BJB6;H3BKG2;H3BL  | P42932;H3BL49         | T-complex protein 1 subunit theta              | Cct8       |
| 28.98414                  | 28.93157                  | 29.1795                   | P48678;D3YUF7                     | P48678                | Prelamin-A/C                                   | Lmna       |
| 32.01505                  | 32.03157                  | 31.94698                  | P57780;A0A11LSV25;E9Q2W9;A0A11L   | P57780;A0A11LSV25;E9Q | Alpha-actinin-4;Alpha-actinin-4 (Fragment)     | Actn4      |
| 29.56275                  | 29.71129                  | 29.64753                  | Q64514;A0A087WRC0;Q05DJ9;A0A087   | Q64514;A0A087WRC0     | Tripeptidyl-peptidase 2                        | Tpp2       |
| 28.10649                  | 28.14589                  | 28.26249                  | Q7TQD7;P46735;E9QNH6;E9Q580;D3Y   | Q7TQD7;P46735;E9QNH6  | Myo1b protein;Unconventional myosin-1b         | Myo1b      |
| 30.80039                  | 30.83092                  | 30.69644                  | Q8B8Q7                            | Q8B8Q7                | Alanine--tRNA ligase, cytoplasmic              | Aars       |
| 29.96774                  | 30.02168                  | 30.02168                  | Q8BU30;E9Q866;F6Q6R1              | Q8BU30                | Isoleucine--tRNA ligase, cytoplasmic           | Iars       |
| 31.7211                   | 31.79266                  | 31.79653                  | Q9D379;E9PWK1;F6YTS6;D3Z4M3       | Q9D379;E9PWK1         | Epoxide hydrolase 1;Epoxide hydrolase          | Ephx1      |
| 28.41135                  | 28.31959                  | 28.2803                   | O35379;E9Q1I5;D3ZY1               | O35379                | Multidrug resistance-associated protein 1      | Abcc1      |
| 31.39305                  | 31.36724                  | 31.34096                  | P38647                            | P38647                | Stress-70 protein, mitochondrial               | Hspa9      |
| 31.50142                  | 31.33565                  | 31.45807                  | P70168                            | P70168                | Importin subunit beta-1                        | Kpnb1      |
| 30.93298                  | 30.91171                  | 30.78488                  | Q61739                            | Q61739                | Integrin alpha-6                               | Itga6      |
| 31.17831                  | 31.27031                  | 31.16639                  | A0A1C7CVV0;Q99K51;B1AX58;Q61233;  | A0A1C7CVV0;Q99K51;B1A | Plastin-3 (Fragment);Plastin-3                 | Pls3       |
| 30.76129                  | 30.80039                  | 30.71293                  | Q02053;P31254                     | Q02053                | Ubiquitin-like modifier-activating enzyme 1    | Uba1       |
| 32.45317                  | 32.38792                  | 32.40831                  | Q03265;D3Z6F5;D6RJ16              | Q03265;D3Z6F5         | ATP synthase subunit alpha, mitochondrial;     | Atp5a1     |
| 34.09899                  | 34.01837                  | 33.99328                  | P17182;Q6PHC1;B0QZL1;B1ARR7;B1AR  | P17182;Q6PHC1         | Alpha-enolase                                  | Eno1       |
| 30.55728                  | 30.57542                  | 30.66289                  | Q3U2G2;Q61316                     | Q3U2G2;Q61316         | Heat shock 70 kDa protein 4                    | Hspa4      |
| 29.8549                   | 29.94                     | 29.96774                  | Q3V3R1                            | Q3V3R1                | Monofunctional C1-tetrahydrofolate syntha      | Mthfd11    |
| 30.27586                  | 30.4334                   | 30.34096                  | Q60864                            | Q60864                | Stress-induced-phosphoprotein 1                | Stip1      |
| 29.51465                  | 29.54995                  | 29.54075                  | Q78PY7;Q3TJ56;E9Q3E9              | Q78PY7;Q3TJ56         | Staphylococcal nuclease domain-containing      | Snd1       |
| 24.87643                  | 26.10149                  | 25.89273                  | Q8BMMK4                           | Q8BMMK4               | Cytoskeleton-associated protein 4              | Ckap4      |
| 29.55728                  | 29.69312                  | 29.66289                  | Q9Z1Q9;G3UY93;G3U2Z2;G3UYW2;G3U   | Q9Z1Q9;G3UY93         | Valine--tRNA ligase;Valine--tRNA ligase (Frag  | Vars       |
| 30.46295                  | 30.52962                  | 30.48232                  | G5E829;A0A1W2P7C7;Q3UHH0;F8WHB    | G5E829                | Plasma membrane calcium-transporting ATP       | Atp2b1     |
| 31.80424                  | 31.72517                  | 31.78097                  | P80314;A0A1W2P7B7;A0A1W2P828;A0   | P80314                | T-complex protein 1 subunit beta               | Cct2       |
| 29.45317                  | 29.62331                  | 29.65608                  | Q62351;Q8C872                     | Q62351;Q8C872         | Transferrin receptor protein 1                 | Tfrc       |

|          |          |          |                                         |                              |                                                                                 |               |
|----------|----------|----------|-----------------------------------------|------------------------------|---------------------------------------------------------------------------------|---------------|
| 28.97596 | 28.96774 | 29.06599 | Q7TMB8;A0A0R4J119;A0A0U1RQ05            | Q7TMB8;A0A0R4J119;A0A0U1RQ05 | Cytoplasmic FMR1-interacting protein 1                                          | Cyfp1         |
| 19.34082 | 21.82299 | 20.49717 | Q99K41                                  | Q99K41                       | EMILIN-1                                                                        | Emilin1       |
| 29.73085 | 29.68311 | 29.79576 | Q9WVVK4                                 | Q9WVVK4                      | EH domain-containing protein 1                                                  | Ehd1          |
| 33.09428 | 33.08797 | 32.98142 | P05064;A6ZI44;D3YW11;Q9CPQ9;A6ZI44      | P05064;A6ZI44;D3YW11;Q9CPQ9  | Fructose-bisphosphate aldolase A;Fructose-1,6-bisphosphate aldolase A           | Aldoa         |
| 31.50142 | 31.58889 | 31.51089 | P35564                                  | P35564                       | Calnexin                                                                        | Canx          |
| 36.55556 | 36.53543 | 36.53832 | P63260;B1ATY1;G3UYG0                    | P63260                       | Actin, cytoplasmic 2                                                            | Actg1         |
| 28.56456 | 28.71947 | 28.51277 | Q02819;A0A1C7YU3;A0A1B0GR41;A0A1B0GR41  | Q02819;A0A1C7YU3;A0A1B0GR41  | Nucleobindin-1;Nucleobindin 1, isoform CRA1                                     | Nucb1         |
| 27.68646 | 27.63201 | 27.80809 | Q5SWU9;V9GWS0;V9GX1;D3Z0B3              | Q5SWU9                       | Acetyl-CoA carboxylase 1                                                        | Acaca         |
| 28.86821 | 28.87408 | 28.86821 | Q8CIE6;F8WHL2;F6XJN3                    | Q8CIE6;F8WHL2                | Coatomer subunit alpha                                                          | Copa          |
| 29.71293 | 29.71293 | 29.62506 | A0A0R4J0Z1;P08003                       | A0A0R4J0Z1;P08003            | Protein disulfide-isomerase A4                                                  | Pdia4         |
| 29.13858 | 29.22159 | 29.36202 | P43406;A2AKI5;B7ZC19;F6W6Q6             | P43406;A2AKI5                | Integrin alpha-V                                                                | Itgav         |
| 22.94235 | 22.40665 | 23.417   | P97449;A0A0U1RNS3                       | P97449                       | Aminopeptidase N                                                                | Anpep         |
| 29.48232 | 29.39509 | 29.50332 | Q6P5E4;G3UYG7;G3UZU8;G3UY73;G3U9        | Q6P5E4                       | UDP-glucose:glycoprotein glucosyltransferase 1                                  | Ugg1          |
| 30.09899 | 30.23078 | 30.16039 | Q9QUR6                                  | Q9QUR6                       | Prolyl endopeptidase                                                            | Prep          |
| 31.81192 | 31.68813 | 31.69229 | D3Z2H9;D3YVRO                           | D3Z2H9                       | Tropomyosin 3, related sequence 7                                               | Tpm3-rs7      |
| 28.87701 | 28.92309 | 28.75175 | E9PVA8                                  | E9PVA8                       | eIF-2-alpha kinase activator GCN1                                               | Gcn1          |
| 32.27309 | 32.31149 | 32.26472 | P09411;S4R2M7                           | P09411;S4R2M7                | Phosphoglycerate kinase 1;Phosphoglycerate kinase 1                             | Pgk1          |
| 31.87921 | 31.81955 | 31.79266 | P40124;B1ARSO                           | P40124                       | Adenylyl cyclase-associated protein 1                                           | Cap1          |
| 31.45317 | 31.41337 | 31.29789 | P80313;A0A0N4SV00;A0A0N4SV00            | P80313;A0A0N4SV00            | T-complex protein 1 subunit eta                                                 | Cct7          |
| 29.42742 | 29.4746  | 29.34308 | Q61699;E9Q0U7;D3Z027;A0A0U1RQ05         | Q61699;E9Q0U7                | Heat shock protein 105 kDa                                                      | Hsp17         |
| 28.29789 | 28.17474 | 28.60045 | Q62261;A0A0A0MQG2                       | Q62261;A0A0A0MQG2            | Spectrin beta chain, non-erythrocytic 1;Spectrin beta chain, non-erythrocytic 1 | Sptbn1        |
| 29.83244 | 29.89735 | 29.69146 | Q62470;F6UD16                           | Q62470                       | Integrin alpha-3                                                                | Itga3         |
| 29.51841 | 29.54628 | 29.53148 | Q922D8;A0A1W2P733;A0A1W2P7L5            | Q922D8;A0A1W2P733            | C-1-tetrahydrofolate synthase, cytoplasmic                                      | Mthfd1        |
| 31.64581 | 31.73731 | 31.65864 | Q9D8E6                                  | Q9D8E6                       | 60S ribosomal protein L4                                                        | Rpl4          |
| 31.50616 | 31.55728 | 31.46295 | O88342;A0A0I9YU05                       | O88342                       | WD repeat-containing protein 1                                                  | Wdr1          |
| 27.96499 | 28.07623 | 28.11148 | P16546;A3KGU5;A3KGU7;E9Q447;A3KGU7      | P16546;A3KGU5;A3KGU7         | Spectrin alpha chain, non-erythrocytic 1                                        | Sptan1        |
| 31.06728 | 31.01505 | 31.0544  | P80316;E0CZA1                           | P80316                       | T-complex protein 1 subunit epsilon                                             | Cct5          |
| 28.61807 | 28.61105 | 28.70306 | E9Q586;E9Q3M3;O08788;D3YX34;D3Z2H9      | E9Q586;E9Q3M3;O08788         | Dynactin subunit 1                                                              | Dctn1         |
| 30.96086 | 30.90455 | 30.86821 | P11983;F2Z483                           | P11983                       | T-complex protein 1 subunit alpha                                               | Tct1          |
| 30.61105 | 30.64581 | 30.62854 | P40142;A0A286YE28;E0CY51                | P40142;A0A286YE28            | Transketolase;Transketolase (Fragment)                                          | Tkt           |
| 31.32496 | 31.27586 | 31.26472 | P80315;G5E839;G3UYW5;G3UXF3;G3UYW5      | P80315;G5E839                | T-complex protein 1 subunit delta                                               | Cct4          |
| 31.02168 | 31.11768 | 31.0414  | P80318;E9Q133;Q3U0I3;F6Q609;F6ZVQ9      | P80318;E9Q133;Q3U0I3;F6ZVQ9  | T-complex protein 1 subunit gamma                                               | Cct3          |
| 31.11768 | 31.0544  | 31.02168 | Q3TFD0;Q9CZN7                           | Q3TFD0;Q9CZN7                | Serine hydroxymethyltransferase                                                 | Shmt2         |
| 31.19601 | 31.09899 | 31.17236 | Q61598;A0A1Y7VL99;A0A1Y7VLG4            | Q61598;A0A1Y7VL99            | Rab GDP dissociation inhibitor beta;Rab GDP dissociation inhibitor beta         | Gdi2          |
| 29.37451 | 29.35993 | 29.23991 | Q8BK5                                   | Q8BK5                        | Imporin-5                                                                       | Ipo5          |
| 29.71293 | 29.77706 | 29.69312 | Q8C4U8;O35474;Q8C8K0                    | Q8C4U8;O35474;Q8C8K0         | EGF-like repeat and discoidin I-like domain-containing protein 1                | Edil3         |
| 30.04791 | 30.16039 | 30.07368 | Q91YQ5;A0A0N4SUJ8                       | Q91YQ5                       | Dolichyl-diphosphooligosaccharide--protein transferase 2                        | Rpn1          |
| 30.14831 | 30.12386 | 30.11148 | Q9CWJ9                                  | Q9CWJ9                       | Bifunctional purine biosynthesis protein PUR1                                   | Pur1          |
| 30.42342 | 30.59335 | 30.45317 | Q9WV91                                  | Q9WV91                       | Prostaglandin F2 receptor negative regulator 1                                  | Ptgnr1        |
| 29.95394 | 30.07368 | 30.02168 | F8VPU2;E9Q805                           | F8VPU2                       | FERM, ARHGGEF and pleckstrin domain-containing protein 1                        | Farp1         |
| 31.49667 | 31.5527  | 31.62854 | P09055                                  | P09055                       | Integrin beta-1                                                                 | Itgb1         |
| 29.82031 | 29.81268 | 29.84296 | Q00612;A3KG36;G3UWD6;P97324;REV         | Q00612;A3KG36                | Glucose-6-phosphate 1-dehydrogenase X;Glucose-6-phosphate 1-dehydrogenase X     | G6pdx         |
| 30.6372  | 30.76129 | 30.74535 | Q04857                                  | Q04857                       | Collagen alpha-1(VI) chain                                                      | Col6a1        |
| 27.80193 | 27.90885 | 27.82031 | Q4FE56;P70398;E9PWA9;F8VPU6;G3UYW5      | Q4FE56;P70398                | Probable ubiquitin carboxyl-terminal hydrolase 1                                | Usp9x         |
| 30.91883 | 30.99496 | 31.09899 | Q6IRU2                                  | Q6IRU2                       | Tropomyosin alpha-4 chain                                                       | Tpm4          |
| 31.00838 | 31.0414  | 30.96774 | Q76M23;G3UWL2;G3UXQ1                    | Q76M23                       | Serine/threonine-protein phosphatase 2A 60 kDa isoform alpha                    | Ppp2r1a       |
| 29.21928 | 29.30661 | 29.23306 | Q8C129                                  | Q8C129                       | Leucyl-cystinyl aminopeptidase                                                  | Lnpep         |
| 28.88285 | 28.76762 | 28.88577 | Q8VEK3                                  | Q8VEK3                       | Heterogeneous nuclear ribonucleoprotein U                                       | Hnrnpu        |
| 29.77077 | 29.89591 | 29.74053 | Q9D0I9                                  | Q9D0I9                       | Arginine--tRNA ligase, cytoplasmic                                              | Rars          |
| 27.391   | 27.32389 | 27.43141 | Q9QY06                                  | Q9QY06                       | Unconventional myosin-IXb                                                       | Myo9b         |
| 28.34096 | 28.31095 | 28.27142 | A2AS98;P28660                           | A2AS98;P28660                | Nck-associated protein 1                                                        | Nckap1        |
| 23.06579 | 23.51653 | 23.17798 | E9Q8I0;P06909;D6RGQ0;E9Q8H9;A0A0U1RQ05  | E9Q8I0;P06909;D6RGQ0;E9Q8H9  | Complement factor H                                                             | Cfh           |
| 33.86083 | 33.88831 | 33.81383 | P05213                                  | P05213                       | Tubulin alpha-1B chain                                                          | Tuba1b        |
| 34.38921 | 34.33031 | 34.31013 | P10126;D3YZ68;D3Z318;P62631             | P10126;D3YZ68;D3Z318;P62631  | Elongation factor 1-alpha 1;Elongation factor 1-alpha 1                         | Eef1a1        |
| 30.80039 | 30.82335 | 30.71293 | P12382;A0A1W2P7T1                       | P12382                       | ATP-dependent 6-phosphofructokinase, liver type 2                               | Pfkfb1        |
| 29.34096 | 29.35153 | 29.28472 | P46471;Q8BVQ9                           | P46471;Q8BVQ9                | 26S proteasome regulatory subunit 7                                             | Psmc2         |
| 29.67303 | 29.64753 | 29.65608 | P50516;D3Z1B9;D3YWH3;D3YZ23             | P50516                       | V-type proton ATPase catalytic subunit A                                        | Atp6v1a       |
| 33.67346 | 33.63071 | 33.66289 | P68372;Q9D6F9                           | P68372;Q9D6F9                | Tubulin beta-4B chain;Tubulin beta-4A chain                                     | Tubb4b;Tubb4a |
| 29.54259 | 29.64924 | 29.4919  | Q3TX57;J3QN38;D6RGR5                    | Q3TX57                       | 26S proteasome non-ATPase regulatory subunit 8                                  | Psmd1         |
| 29.15798 | 29.22619 | 29.11644 | Q3TZ77;A0A1Y7VM39;A0A1Y7VNA1            | Q3TZ77                       | Extended synaptotagmin-2                                                        | Esy2          |
| 30.67976 | 30.67976 | 30.64581 | Q9CZD3                                  | Q9CZD3                       | Glycine--tRNA ligase                                                            | Gars          |
| 29.74535 | 29.80501 | 29.80501 | Q9D0R2;Q8BLY2                           | Q9D0R2                       | Threonine--tRNA ligase, cytoplasmic                                             | Tars          |
| 29.57001 | 29.59156 | 29.72923 | Q9JKR6;F6TRP3;A0A1L1SQ34;E0CYZ2         | Q9JKR6                       | Hypoxia up-regulated protein 1                                                  | Hyou1         |
| 28.09648 | 27.96499 | 27.87994 | A0A087WPL5;E9QNN1;O70133;Q3UR40         | A0A087WPL5;E9QNN1;O70133     | ATP-dependent RNA helicase A                                                    | Dhx9          |
| 27.39917 | 27.07112 | 27.38278 | E9Q035;P47758;F7CJN9;F7BAE9;A0A1Y7VNA1  | E9Q035                       | Predicted gene 20425                                                            | Gm20425       |
| 31.37244 | 31.36724 | 31.2535  | P06745;A0A0U1RP97;A0A0U1RQ72;A0A0U1RQ72 | P06745                       | Glucose-6-phosphate isomerase                                                   | Gpi           |
| 31.72517 | 31.65864 | 31.63288 | P08752;A0A0A6YWA9;B2RSH2;A0A0A6YWA9     | P08752;A0A0A6YWA9            | Guanine nucleotide-binding protein G(i) subunit 2                               | Gnai2         |
| 31.89735 | 31.99159 | 32.01172 | P10852;A0A0U1RP98;A0A0U1RPL8;A0A0U1RPL8 | P10852                       | 4F2 cell-surface antigen heavy chain                                            | Slc3a2        |
| 31.6372  | 31.61982 | 31.57091 | P14211                                  | P14211                       | Calreticulin                                                                    | Calr          |
| 30.28692 | 30.39305 | 30.40324 | P37040;Q05DV1;E9Q097;E9PVT9;F6R7H       | P37040;Q05DV1                | NADPH--cytochrome P450 reductase                                                | Por           |
| 28.71293 | 28.81726 | 28.91171 | P37889                                  | P37889                       | Fibulin-2                                                                       | Fbln2         |
| 27.98685 | 28.14589 | 28.08132 | P47856;Q9Z229;D3YYD9;D3YYE0             | P47856                       | Glutamine--fructose-6-phosphate aminotransferase 1, cytoplasmic                 | Gfpt1         |
| 30.93298 | 30.98821 | 30.90455 | P60843                                  | P60843                       | Eukaryotic initiation factor 4A-I                                               | Eif4a1        |
| 32.60664 | 32.65864 | 32.74134 | P63101;D3YXN6;D3YXF4;D3YW45             | P63101                       | 14-3-3 protein zeta/delta                                                       | Ywhz4         |
| 28.46295 | 28.5969  | 28.67976 | Q3UPL0;S4R2A9;S4R192;S4R256;S4R1T       | Q3UPL0;S4R2A9                | Protein transport protein Sec31A;Protein transport protein Sec31A               | Sec31a        |
| 28.82335 | 28.89157 | 28.74855 | Q3UW53;E9PYV4;D3Z233;D3YYZ9             | Q3UW53;E9PYV4                | Protein Niban                                                                   | Fam129a       |
| 29.14831 | 29.14102 | 29.1474  | Q61508;D3Z0U9;D3Z038;D3YV22;D3YZ        | Q61508                       | Extracellular matrix protein 1                                                  | Ecm1          |
| 30.09899 | 30.20769 | 30.12386 | Q922B2;Q8BJY7                           | Q922B2                       | Aspartate--tRNA ligase, cytoplasmic                                             | Dars          |
| 29.69312 | 29.80501 | 29.79421 | Q99KIO                                  | Q99KIO                       | Aconitate hydratase, mitochondrial                                              | Aco2          |
| 28.62854 | 28.7162  | 28.65608 | E9QB02;Q68FL6;F6W0G8                    | E9QB02;Q68FL6                | Methionine--tRNA ligase, cytoplasmic                                            | Mars          |
| 29.81268 | 29.91171 | 29.86821 | O08529                                  | O08529                       | Calpain-2 catalytic subunit                                                     | Capn2         |
| 28.56456 | 28.52028 | 28.60045 | O55029                                  | O55029                       | Coatomer subunit beta                                                           | Copb2         |
| 31.70058 | 31.74535 | 31.70471 | P19324;A0A140LHR4;A0A140LHK0;A0A140LHK0 | P19324                       | Serpin H1                                                                       | Serpinh1      |
| 29.86083 | 29.91171 | 29.94    | P46935;Q3V335;V9GWV8;V9GXK3;V9G         | P46935                       | E3 ubiquitin-protein ligase NEDD4                                               | Nedd4         |
| 31.33031 | 31.31959 | 31.33031 | P47738;A0A0G2JEU1;A0A0G2JFQ0;A0A0G2JFQ0 | P47738;A0A0G2JEU1            | Aldehyde dehydrogenase, mitochondrial                                           | Aldh2         |
| 32.622   | 32.52028 | 32.49667 | P56480                                  | P56480                       | ATP synthase subunit beta, mitochondrial                                        | Atp5b         |
| 31.75732 | 31.76525 | 31.64151 | P97351                                  | P97351                       | 40S ribosomal protein S3a                                                       | Rps3a         |
| 31.48232 | 31.45807 | 31.57993 | P97429;A0A0N4SW89;D3Z0S1;A0A0N4SW89     | P97429;A0A0N4SW89;D3Z0S1     | Annexin A4;Annexin (Fragment)                                                   | Anxa4         |

|          |          |          |                                    |                                    |                                                        |                 |
|----------|----------|----------|------------------------------------|------------------------------------|--------------------------------------------------------|-----------------|
| 29.87555 | 29.89446 | 29.87262 | Q61553;A0A0G2JDU7;F7BDR1           | Q61553;A0A0G2JDU7                  | Fascin                                                 | Fscn1           |
| 29.47073 | 29.43539 | 29.46684 | Q6ZQ38;D3YWCS                      | Q6ZQ38                             | Cullin-associated NEDD8-dissociated protein            | Cand1           |
| 28.97869 | 28.78644 | 28.81726 | Q9JJ28                             | Q9JJ28                             | Protein flightless-1 homolog                           | Flii            |
| 29.08639 | 29.12736 | 29.14831 | E9QPE2;E9QN12;P05622               | E9QPE2;E9QN12;P05622               | Platelet-derived growth factor receptor beta           | Pdgfrb          |
| 28.14589 | 27.98142 | 27.75175 | G3X922;D4AFX7;A0A087WRC9;A0A087    | G3X922;D4AFX7                      | DnaJ heat shock protein family (Hsp40) member          | Dnajc13         |
| 24.94949 | 24.33074 | 26.07316 | P01902;F6TIX5;Q9BCZ1;A7VMS2;Q3161  | P01902                             | H-2 class I histocompatibility antigen, K-D alpha      | H2-K1           |
| 28.16039 | 28.31959 | 28.36202 | P17879;Q61696                      | P17879;Q61696                      | Heat shock 70 kDa protein 1B;Heat shock 70 kDa protein | Hspa1B;Hspa1a   |
| 34.09113 | 34.09899 | 34.03485 | P21956                             | P21956                             | Lactadherin                                            | Mfge8           |
| 32.05116 | 32.08955 | 32.13001 | P62702;V9GWY0                      | P62702                             | 40S ribosomal protein S4, X isoform                    | Rps4x           |
| 31.6501  | 31.61982 | 31.59335 | P62908;D3YV43;A0A140L177           | P62908;D3YV43;A0A140L177           | 40S ribosomal protein S3                               | Rps3            |
| 28.66966 | 28.75494 | 28.71947 | P98063;E9Q5B9;Q9WVM6;G3X9F5;Q621   | P98063                             | Bone morphogenetic protein 1                           | Bmp1            |
| 28.98685 | 28.97049 | 29.01903 | Q61398;D3YUE2;A0A0G2JE29;D3YZE3;I  | Q61398;D3YUE2;A0A0G2JE29;D3YZE3;I  | Procollagen C-endopeptidase enhancer 1                 | Pcolce          |
| 30.08639 | 30.16039 | 30.08639 | Q62167;P16381;Q62095;Q3V086;Q614   | Q62167;P16381;Q62095               | ATP-dependent RNA helicase DDX3X;Putative              | Ddx3x;D1Pas1    |
| 26.83846 | 27.10149 | 26.99766 | Q7TPV4                             | Q7TPV4                             | Myb-binding protein 1A                                 | Mybbp1a         |
| 26.93157 | 27.43936 | 27.41538 | Q7TT50;A0A1Y7VKD5;A0A1Y7VLI0;A0A1  | Q7TT50                             | Serine/threonine-protein kinase MRCK beta              | Cdc42bbp        |
| 29.62506 | 29.52589 | 29.51653 | Q8C605;Q9WUA3;D3YUA3;F6YL81        | Q8C605;Q9WUA3                      | ATP-dependent 6-phosphofructokinase;ATP                | Pfkb            |
| 29.40324 | 29.45317 | 29.40933 | Q8R422                             | Q8R422                             | CD109 antigen                                          | CD109           |
| 30.38278 | 30.27586 | 30.44332 | Q91VI7;A0A1B0GSG5;A0A1B0GRG4;A0    | Q91VI7;A0A1B0GSG5                  | Ribonuclease inhibitor                                 | Rnh1            |
| 31.40324 | 31.49667 | 31.35678 | Q9R118                             | Q9R118                             | Serine protease HTRA1                                  | Htra1           |
| 27.85638 | 27.82031 | 27.86231 | A0A0U1RNK7;A2A9M5;E9PX48;A2A9M5    | A0A0U1RNK7;A2A9M5;E9PX48;A2A9M5    | Dedicator of cytokinesis protein 7                     | Dock7           |
| 31.20769 | 31.21928 | 31.15436 | A0A2C9F2D2;Q07076;A0A286YCW4       | A0A2C9F2D2;Q07076                  | Annexin A7                                             | Anxa7           |
| 29.50711 | 29.75334 | 29.52216 | E9PW8E;Q3TT92;Q62188;D3YU50;D3Z5   | E9PW8E;Q3TT92;Q62188               | Dihydropyrimidinase-related protein 3                  | Dpysl3          |
| 22.70978 | 22.239   | 20.90976 | P08121;A0A087WPJ5;A0A087WPS3       | P08121                             | Collagen alpha-1(III) chain                            | Col3a1          |
| 31.47267 | 31.35153 | 31.4334  | P12970;A0A140T8L1;A0A140T8L3;V9G   | P12970;A0A140T8L1;A0A140T8L3;V9G   | 60S ribosomal protein L7a;Ribosomal protein            | Rpl7a;Rpl7a-ps3 |
| 27.80809 | 28.00838 | 27.91456 | P24270;A2AL20                      | P24270                             | Catalase                                               | Cat             |
| 31.7211  | 31.77313 | 31.69644 | P27659;A0A087WQK0;A0A087WNS0;Q     | P27659                             | 60S ribosomal protein L3                               | Rpl3            |
| 30.12386 | 30.13614 | 30.07368 | Q3TGU7;P50580                      | Q3TGU7;P50580                      | Proliferation-associated 2G4;Proliferation-as          | Pa2g4           |
| 33.13461 | 33.13155 | 33.02993 | Q564E2;P06151;A0A1B0GSX0;A0A1B0G   | Q564E2;P06151;A0A1B0GSX0;A0A1B0G   | L-lactate dehydrogenase;L-lactate dehydrog             | Ldha            |
| 31.31959 | 31.44825 | 31.41337 | Q61753;F6ZS7                       | Q61753                             | D-3-phosphoglycerate dehydrogenase                     | Phgdh           |
| 27.84446 | 27.65267 | 27.48616 | Q8BH64;D3Z7U7                      | Q8BH64                             | EH domain-containing protein 2                         | Ehd2            |
| 30.42342 | 30.50142 | 30.45317 | Q8BP47                             | Q8BP47                             | Asparagine--tRNA ligase, cytoplasmic                   | Nars            |
| 29.66628 | 29.61105 | 29.72598 | Q8BT60;Q9D6C8;Q3UYN2;Q9Z140;Q8B    | Q8BT60                             | Copine-3                                               | Cpne3           |
| 29.00571 | 29.08132 | 29.08385 | Q99104;D3YZ62;D3Z4J3;F6TDE5;B8JKO  | Q99104;D3YZ62;D3Z4J3               | Unconventional myosin-Va                               | Myo5a           |
| 27.43141 | 27.37451 | 27.391   | Q9EPU0                             | Q9EPU0                             | Regulator of nonsense transcripts 1                    | Upf1            |
| 29.70141 | 29.57362 | 29.61982 | Q9EQH3                             | Q9EQH3                             | Vacuolar protein sorting-associated protein            | Vps35           |
| 31.0927  | 31.19013 | 31.14224 | Q9QZF2                             | Q9QZF2                             | Glypican-1                                             | Gpc1            |
| 28.57181 | 28.75175 | 28.70306 | Q9Z110;D3Z0B4;H3BKJ8;H3BLE8;H3BK   | Q9Z110                             | Delta-1-pyrroline-5-carboxylate synthase               | Aldh18a1        |
| 28.77077 | 28.98142 | 28.88577 | A2A7S7;Q91WQ3;F6VXZ2               | A2A7S7;Q91WQ3                      | Tyrosine--tRNA ligase;Tyrosine--tRNA ligase            | Yars            |
| 32.19601 | 32.29789 | 32.29515 | E9QPX1;P39061;A0A1W2P6N8;D3Z556    | E9QPX1;P39061                      | Collagen alpha-1(XVIII) chain                          | Col18a1         |
| 28.60752 | 28.62854 | 28.76762 | P09405                             | P09405                             | Nucleolin                                              | Ncl             |
| 29.39917 | 29.4174  | 29.461   | P11688                             | P11688                             | Integrin alpha-5                                       | Igfa5           |
| 31.78877 | 31.72517 | 31.72923 | P14148;F6XI62                      | P14148;F6XI62                      | 60S ribosomal protein L7;60S ribosomal prot            | Rpl7            |
| 29.24445 | 29.4174  | 29.258   | P16460                             | P16460                             | Argininosuccinate synthase                             | Ass1            |
| 29.73247 | 29.80809 | 29.68144 | P26443;F7CFA5                      | P26443                             | Glutamate dehydrogenase 1, mitochondrial               | Glud1           |
| 31.2814  | 31.16639 | 31.13001 | P80317                             | P80317                             | T-complex protein 1 subunit zeta                       | Cct6a           |
| 28.57542 | 28.48616 | 28.64924 | Q60715                             | Q60715                             | Prolyl 4-hydroxylase subunit alpha-1                   | P4ha1           |
| 29.80039 | 29.78332 | 29.73085 | Q61503                             | Q61503                             | 5-nucleotidase                                         | Nt5e            |
| 30.35153 | 30.33031 | 30.41337 | Q8C483;P26638;A2AFS0;A2AFS1        | Q8C483;P26638;A2AFS0;A2AFS1        | Serine--tRNA ligase, cytoplasmic;Serine--tRN           | Sars            |
| 28.83244 | 28.69644 | 28.78644 | Q8CI51;D9I2Z9;D9I300;D9I301;D9I302 | Q8CI51;D9I2Z9;D9I300;D9I301;D9I302 | PDZ and LIM domain protein 5;ENH isoform               | Pdlim5          |
| 30.80809 | 30.81574 | 30.86083 | Q99JY9;A0A087WRA1;A0A087WQ14;A0    | Q99JY9                             | Actin-related protein 3                                | Actr3           |
| 30.41337 | 30.52028 | 30.52028 | Q9DCD0                             | Q9DCD0                             | 6-phosphogluconate dehydrogenase, decar                | Pgd             |
| 28.50142 | 28.52402 | 28.62506 | Q9EP69                             | Q9EP69                             | Phosphatidylinositol phosphatase SAC1                  | Sacm1           |
| 28.99226 | 28.99496 | 28.99766 | Q9ER72;A0A140LIB6;A0A140LI17       | Q9ER72                             | Cysteine--tRNA ligase, cytoplasmic                     | Cars            |
| 29.47846 | 29.57181 | 29.56456 | Q9QUJ7                             | Q9QUJ7                             | Long-chain-fatty-acid--CoA ligase 4                    | Acsl4           |
| 28.24898 | 28.37036 | 28.41135 | Q9WTM5;A0A1B0GSR4;A0A1B0GRW3;A     | Q9WTM5                             | RuvB-like 2                                            | Ruvb2           |
| 29.88867 | 29.76762 | 29.85341 | Q9WVM1;E9Q9N9;E9Q851;F6WD40        | Q9WVM1                             | Rac GTPase-activating protein 1                        | Racgap1         |
| 29.13614 | 29.13369 | 29.04009 | G3UVV4;P17710;D3YR4;D3Z365;D3Z11   | G3UVV4;P17710                      | Hexokinase 1, isoform CRA_f;Hexokinase-1               | Hk1             |
| 31.51559 | 31.36202 | 31.36202 | P10923;F8WIP8;D3Z4N2;D3Z513;D3Z11  | P10923;F8WIP8                      | Osteopontin                                            | Spp1            |
| 34.42091 | 34.29652 | 34.19014 | P16858;A0A0A0MQF6;S4R1W1;A0A1DE    | P16858;A0A0A0MQF6;S4R1W1;A0A1DE    | Glyceraldehyde-3-phosphate dehydrogenase               | Gapdh           |
| 29.59335 | 29.64924 | 29.54444 | P29341;Q9D4E6;Q62029;F6ZAX1;Q8C7   | P29341;Q9D4E6                      | Polyadenylate-binding protein 1;Polyadenyl             | Pabpc1;Pabpc6   |
| 31.12386 | 31.10525 | 31.0544  | Q07797;E9Q5X5                      | Q07797                             | Galactin-3-binding protein                             | Lgals3bp        |
| 28.72923 | 28.76762 | 28.89157 | Q3T9X3;F8WIV5;P39054;Q3TCR7;G3X9   | Q3T9X3;F8WIV5;P39054;Q3TCR7;G3X9   | Dynamin-2                                              | Dnm2;D          |
| 28.78644 | 28.71947 | 28.66289 | Q4VA93;P20444;Q3TQ39;P68404;Q2NK   | Q4VA93;P20444                      | Protein kinase C;Protein kinase C alpha type           | Prkca           |
| 24.417   | 25.01478 | 23.59833 | Q60790;D6RF80                      | Q60790                             | Ras GTPase-activating protein 3                        | Rasa3           |
| 28.61456 | 28.7357  | 28.69644 | Q80UE5;O70318;Q80UE4;A0A1W2P6I5    | Q80UE5;O70318;Q80UE4               | Band 4.1-like protein 2                                | Epb41l2         |
| 28.27586 | 28.4073  | 28.37036 | Q8K009;D3Z6B9                      | Q8K009;D3Z6B9                      | Mitochondrial 10-formyltetrahydrofolate de             | Aldh1l2         |
| 29.98142 | 30.14831 | 30.02168 | Q9DCL9;D3Z6P1;D6RCU8               | Q9DCL9                             | Multifunctional protein ADE2                           | Paics           |
| 29.63547 | 29.76288 | 29.72273 | Q9EPL8;A0A140LHDO                  | Q9EPL8                             | Importin-7                                             | Ipo7            |
| 28.57181 | 28.64924 | 28.28472 | Q9JIF7                             | Q9JIF7                             | Coatomer subunit beta                                  | Copb1           |
| 28.9     | 28.95394 | 29.14589 | O70475;D3YXP9                      | O70475                             | UDP-glucose 6-dehydrogenase                            | Ugdh            |
| 27.04009 | 26.95394 | 27.2535  | P21447;P21440;A0A0G2JDM4;F6SGP4    | P21447                             | Multidrug resistance protein 1A                        | Abcb1a          |
| 31.61544 | 31.61982 | 31.55728 | P48962;Q3V132                      | P48962                             | ADP/ATP translocase 1                                  | Slc25a4         |
| 30.33031 | 30.28692 | 30.18423 | P97384;D3Z7U0                      | P97384;D3Z7U0                      | Annexin A11;Annexin                                    | Anxa11          |
| 28.22619 | 28.04009 | 28.21697 | Q00519;G3X982;Q3TYQ9               | Q00519                             | Xanthine dehydrogenase/oxidase                         | Xdh             |
| 29.46879 | 29.45317 | 29.57001 | Q3U7R1;A0A1W2P784                  | Q3U7R1                             | Extended synaptotagmin-1                               | Esy1            |
| 30.00838 | 30.04791 | 30.02168 | Q3U9N4;P28798;H3BJE0;H3BJ90;H3BLC  | Q3U9N4;P28798;H3BJE0               | Granulins;Granulins (Fragment)                         | Grn             |
| 31.79653 | 31.88649 | 31.73731 | Q62465                             | Q62465                             | Synaptic vesicle membrane protein VAT-1 h              | Vat1            |
| 28.75175 | 28.80193 | 28.78332 | Q8VCQ8;E9QA16;S4R1T7;E9Q0M9;D3Z    | Q8VCQ8;E9QA16;S4R1T7               | Caldesmon 1                                            | Cald1           |
| 30.85341 | 30.83092 | 30.87555 | Q9D8N0                             | Q9D8N0                             | Elongation factor 1-gamma                              | Eef1g           |
| 30.03486 | 30.14831 | 30.00838 | E9PYT3;Q91YH5;Q8BH66               | E9PYT3;Q91YH5                      | Atlastin-3                                             | Atl3            |
| 29.2007  | 29.13369 | 28.89157 | E9QLA5;Q0GNC1;A0A1Y7VM80           | E9QLA5;Q0GNC1;A0A1Y7VM80           | Inverted formin-2;Inverted formin-2 (Fragm             | Inf2            |
| 29.87994 | 29.89735 | 29.73892 | F7DBB3;Q3URZ6                      | F7DBB3                             | AHNAK nucleoprotein 2 (Fragment)                       | Ahnak2          |
| 28.76446 | 27.75812 | 28.82941 | P10493                             | P10493                             | Nidogen-1                                              | Nid1            |
| 32.48712 | 32.42842 | 32.52262 | P17751;H7BXC3                      | P17751;H7BXC3                      | Triosephosphate isomerase                              | Tpi1            |
| 28.99226 | 29.00035 | 28.96774 | P26040                             | P26040                             | Ezrin                                                  | Ezr             |
| 32.25912 | 32.2535  | 32.20478 | P35700;B1AXW5;B1AXW6;B1AXW4        | P35700;B1AXW5;B1AXW6               | Peroxioredoxin-1;Peroxioredoxin-1 (Fragment)           | Prdx1           |
| 31.78488 | 31.75732 | 31.88285 | P62259;D6REF3;F6WA09               | P62259;D6REF3;F6WA09               | 14-3-3 protein epsilon;14-3-3 protein epsilon          | Ywhae           |
| 29.18423 | 29.27586 | 29.43738 | P62334                             | P62334                             | 26S proteasome regulatory subunit 10B                  | Psmc6           |

|          |          |          |                                   |                        |                                                   |               |
|----------|----------|----------|-----------------------------------|------------------------|---------------------------------------------------|---------------|
| 29.1866  | 29.13124 | 29.22849 | Q03145;E9PUK8;A2BDQ4;G1K381;Q8C   | Q03145                 | Ephrin type-A receptor 2                          | Epha2         |
| 27.91456 | 28.07623 | 27.99766 | Q3U1J4                            | Q3U1J4                 | DNA damage-binding protein 1                      | Ddb1          |
| 29.68646 | 29.64924 | 29.77706 | Q61024;D3Z0C2;D3YYR0;D3Z028       | Q61024                 | Asparagine synthetase [glutamine-hydrolyzi        | Asns          |
| 29.11148 | 29.15798 | 29.23535 | Q8BG32;G3UYH2;G3UYI4;G3UYL3;G3U   | Q8BG32                 | 26S proteasome non-ATPase regulatory sub          | Psmd11        |
| 28.50522 | 28.34096 | 28.4746  | Q8CGK3                            | Q8CGK3                 | Lon protease homolog, mitochondrial               | Lonp1         |
| 29.81115 | 29.70965 | 29.82487 | Q8K2B3;A0A1Y7VJ55                 | Q8K2B3                 | Succinate dehydrogenase [ubiquinone] flavo        | Sdha          |
| 29.07623 | 29.21928 | 29.0296  | Q8R180;A0A1Y7VJM4;A0A1Y7VNF4;Q8   | Q8R180                 | ERO1-like protein alpha                           | Ero1a         |
| 30.38278 | 30.44332 | 30.35153 | Q91Z25;Q9WV32;F6VV6E;F6THG2;D3Z   | Q91Z25;Q9WV32          | Actin-related protein 2/3 complex subunit;A       | ArpC1b        |
| 30.31959 | 30.33031 | 30.34096 | Q99JR5;H3BJ97;H3BKM8              | Q99JR5;H3BJ97          | Tubulointerstitial nephritis antigen-like         | Tinagl1       |
| 29.73085 | 29.66458 | 29.61456 | Q9R1P4;A0A1B0GS70                 | Q9R1P4;A0A1B0GS70      | Proteasome subunit alpha type-1;Proteasom         | Psm1a         |
| 29.26696 | 29.42142 | 29.37244 | Q9WUM4;E9PX03;E9PZJ0;E9PVJ1;B9E1Z | Q9WUM4                 | Coronin-1C                                        | Coro1c        |
| 27.2803  | 27.26249 | 27.54628 | A0A1L1SV73;Q8BY87                 | A0A1L1SV73;Q8BY87      | Ubiquitin carboxyl-terminal hydrolase 47          | Usp47         |
| 27.71947 | 28.28912 | 28.03486 | E9PYK3                            | E9PYK3                 | Poly [ADP-ribose] polymerase                      | Parp4         |
| 28.16997 | 28.00838 | 28.09648 | E9Q668;O08665;O08632              | E9Q668;O08665          | Semaphorin-3A (Fragment);Semaphorin-3A            | Sema3a        |
| 28.3452  | 28.31095 | 28.53519 | F8VQC1;E9Q740                     | F8VQC1;E9Q740          | Signal recognition particle subunit SRP72         | Srp72         |
| 27.81421 | 27.78955 | 27.83244 | F8WJ0;Q9JIS8;A2AGJ9;Q6P6P5;Q3VON  | F8WJ0;Q9JIS8           | Solute carrier family 12 member 4                 | Slc12a4       |
| 29.16039 | 29.32603 | 29.2957  | O88844;A0A087WPT4;A0A087WRS9;D3   | O88844                 | Isocitrate dehydrogenase [NADP] cytoplasm         | Idh1          |
| 28.48616 | 28.49762 | 28.21697 | P01900;P01895                     | P01900;P01895          | H-2 class I histocompatibility antigen, D-D al    | H2-D1         |
| 28.76762 | 28.66628 | 28.82941 | P05201;F7ALS6                     | P05201                 | Aspartate aminotransferase, cytoplasmic           | Got1          |
| 30.39305 | 30.44332 | 30.40324 | P05202                            | P05202                 | Aspartate aminotransferase, mitochondrial         | Got2          |
| 31.67976 | 31.60222 | 31.59779 | P08249;A0A0G2JF23;A0A0G2JGY4      | P08249                 | Malate dehydrogenase, mitochondrial               | Mdh2          |
| 29.44332 | 29.65438 | 29.67472 | P10649;A2AE89;F6WHQ7;A2AE91;D3Y   | P10649;A2AE89;F6WHQ7   | Glutathione S-transferase Mu 1;Glutathione        | Gstm1         |
| 30.61982 | 30.61982 | 30.60222 | P47962;D3YYV8                     | P47962;D3YYV8          | 60S ribosomal protein L5;60S ribosomal pro        | Rpl5          |
| 30.06085 | 30.11148 | 30.14831 | P62137                            | P62137                 | Serine/threonine-protein phosphatase PP1- $\beta$ | Ppp1ca        |
| 31.5527  | 31.55728 | 31.59335 | P68040                            | P68040                 | Receptor of activated protein C kinase 1          | Rack1         |
| 29.07623 | 29.11148 | 29.10899 | Q3TW96;A0A1B0GST7;A0A1B0GR64;AO   | Q3TW96                 | UDP-N-acetylhexosamine pyrophosphorylas           | Uap11         |
| 31.9574  | 31.91528 | 31.86821 | Q64337;D3YZJ1;F6VD69              | Q64337;D3YZJ1          | Sequestosom-1                                     | Sqstm1        |
| 25.84805 | 25.98685 | 26.14492 | Q8BK63                            | Q8BK63                 | Inactive tyrosine-protein kinase 7                | Ptk7          |
| 30.23078 | 30.23078 | 30.17236 | Q99K85;Q3U6K9;E9Q6P1              | Q99K85;Q3U6K9          | Phosphoserine aminotransferase                    | Psat1         |
| 29.89735 | 29.86231 | 29.84894 | Q9CVB6;D3YXG6;A0A087WRT2          | Q9CVB6;D3YXG6          | Actin-related protein 2/3 complex subunit 2       | Arp2          |
| 29.58978 | 29.64238 | 29.66966 | Q9Z0N1;A2AAW9;Q9Z0N2              | Q9Z0N1;A2AAW9;Q9Z0N2   | Eukaryotic translation initiation factor 2 sub    | Eif2s3x       |
| 29.69975 | 29.81268 | 29.64581 | Z4YKV1;P63094;Q6R0H7;Q66L47;Q8CG  | Z4YKV1;P63094;Q6R0H7   | Guanine nucleotide-binding protein G(s) sub       | Gnas          |
| 22.40406 | 23.04427 | 24.37782 | E9Q600;Q924C6;E9PY86              | E9Q600;Q924C6          | Lysyl oxidase homolog 4                           | Loxl4         |
| 30.20769 | 30.36202 | 30.21928 | O35887;G3UWV3;G3UWU0;G3UY49;G3    | O35887;G3UWV3;G3UWU0   | Calumenin;Calumenin (Fragment)                    | Calu          |
| 29.09144 | 29.15557 | 28.99496 | P14685;F7B7L8                     | P14685                 | 26S proteasome non-ATPase regulatory sub          | Psmd3         |
| 33.14224 | 33.02003 | 33.02828 | P18760;F8WGL3                     | P18760;F8WGL3          | Cofilin-1                                         | Cofil1        |
| 28.29789 | 28.28472 | 28.1795  | P48722;E0CY23                     | P48722;E0CY23          | Heat shock 70 kDa protein 4L;Heat shock 70        | Hspa4l        |
| 28.9428  | 29.06343 | 29.11396 | P54071;D6RIL6;A0A0U1RP68;A0A0U1R  | P54071                 | Isocitrate dehydrogenase [NADP], mitochon         | Idh2          |
| 29.0531  | 29.20303 | 29.26249 | P70698                            | P70698                 | CTP synthase 1                                    | Ctsp1         |
| 27.60399 | 28.14102 | 28.27142 | P97298;B7ZC25;F6S1M4;Q5ND37;E9PW  | P97298                 | Pigment epithelium-derived factor                 | Serpinf1      |
| 27.71947 | 27.92025 | 27.97596 | Q00493                            | Q00493                 | Carboxypeptidase E                                | Cpe           |
| 28.391   | 28.3452  | 28.28472 | Q60963;E9Q330;E9Q6J0;E9Q4T5       | Q60963;E9Q330          | Platelet-activating factor acetylhydrolase;Pla    | Pla2g7        |
| 31.54352 | 31.64151 | 31.52496 | Q6ZWN5;F7CJS8;D3YWH9;Q9CXW7;D3    | Q6ZWN5;F7CJS8;D3YWH9   | 40S ribosomal protein S9;40S ribosomal pro        | Rps9          |
| 28.87408 | 28.77077 | 28.98142 | Q6ZWX6                            | Q6ZWX6                 | Eukaryotic translation initiation factor 2 sub    | Eif2s1        |
| 28.83846 | 28.87115 | 28.85638 | Q8BLN5;F7BJL0                     | Q8BLN5                 | Lanosterol synthase                               | Lss           |
| 27.73892 | 27.87994 | 27.85043 | Q8C194;Q9WUB3;E9PUM3;Q9ET01;Q3I   | Q8C194                 | Glycogen phosphorylase, brain form                | Pygb          |
| 28.34942 | 28.47073 | 28.4073  | Q8R1F1;A2ARS6                     | Q8R1F1                 | Niban-like protein 1                              | Fam129b       |
| 26.97596 | 27.10149 | 27.04009 | Q8VDJ3;A0A087WP83;A0A087WS92;AO   | Q8VDJ3;A0A087WP83      | Vigilin                                           | Hdlbp         |
| 30.31959 | 30.27586 | 30.34096 | Q99JZ4;P36536;A0A1W2P869;A0A1W2   | Q99JZ4;P36536          | GTP-binding protein SAR1a                         | Sar1a         |
| 30.39305 | 30.4919  | 30.40324 | Q9CZU6;Q80X68                     | Q9CZU6                 | Citrate synthase, mitochondrial                   | Cs            |
| 28.08132 | 28.20303 | 28.20769 | Q9DDF9;A2CEK3                     | Q9DDF9;A2CEK3          | Phosphoglucomutase-1;Phosphoglucomuta             | Pgm1;Pgm2     |
| 28.41941 | 28.56456 | 28.48616 | Q9D2R0                            | Q9D2R0                 | Acetoacetyl-CoA synthetase                        | Aacs          |
| 24.16423 | 23.28207 | 23.32389 | Q9D6Z1;E0CXZ0;F7CHP9;F7CHQ7;A2AP  | Q9D6Z1;E0CXZ0          | Nucleolar protein 56                              | Nop56         |
| 28.04531 | 28.06085 | 28.08132 | Q9DBG3;H3BIY9;H3BKM0;H3BJ06;Q5SV  | Q9DBG3;H3BIY9;H3BKM0   | AP-2 complex subunit beta;AP complex sub          | Ap2b1         |
| 31.31419 | 31.39305 | 31.45807 | E9PZ00;Q8BFQ1;K3W4L3;J3QPG5;Q612  | E9PZ00;Q8BFQ1;K3W4L3;  | Prosaposin                                        | Psap          |
| 32.01837 | 32.0544  | 31.95394 | E9PZF0;Q01768                     | E9PZF0;Q01768          | Nucleoside diphosphate kinase;Nucleoside          | Nme1;Nme2     |
| 29.23763 | 29.26472 | 29.34731 | E9Q1W0;E9Q1T1;F8WIS9;P11798;F6WF  | E9Q1W0;E9Q1T1          | Calcium/calmodulin-dependent protein kina         | Camk2d        |
| 27.90311 | 28.03486 | 28.11148 | E9Q8Z4;E9Q8Z9;D3Z2H2;E9Q901;E9Q9  | E9Q8Z4;E9Q8Z9;D3Z2H2;E | Catenin delta-1                                   | Ctnd1         |
| 28.49762 | 27.77077 | 28.81115 | E9QN70;P02469                     | E9QN70;P02469          | Laminin subunit beta-1                            | Lamb1         |
| 30.28692 | 30.26472 | 30.21928 | J3QNY1;B2RXM2;A2AL12;Q8BG05;A2AL  | J3QNY1;B2RXM2;A2AL12;  | Predicted pseudogene 9242;EG627828 prot           | Gm9242;Gm67   |
| 30.18423 | 30.19601 | 30.11148 | O08553                            | O08553                 | Dihydropyrimidinase-related protein 2             | Dyps12        |
| 27.84446 | 28.01372 | 28.15557 | P06801;Q3TQP6                     | P06801;Q3TQP6          | NADP-dependent malic enzyme;Malic enzym           | Me1           |
| 29.24672 | 29.32603 | 29.34308 | P18242;F8WIR1;F6Y6L6;A0A1B0GT66   | P18242;F8WIR1;F6Y6L6;A | Cathepsin D;Uncharacterized protein (Fragm        | Ctsd          |
| 28.3662  | 28.33245 | 28.37865 | P23116                            | P23116                 | Eukaryotic translation initiation factor 3 sub    | Eif3a         |
| 31.84595 | 31.95046 | 31.96774 | P47911                            | P47911                 | 60S ribosomal protein L6                          | Rpl6          |
| 29.11892 | 29.13369 | 29.0296  | P54775;A0A140LIZ5                 | P54775;A0A140LIZ5      | 26S proteasome regulatory subunit 6B              | Psmc4         |
| 28.20769 | 28.2535  | 28.391   | P62814;Q91YH6;A0A0U1RNU9          | P62814                 | V-type proton ATPase subunit B, brain isofo       | Atp6v1b2      |
| 30.98821 | 30.98142 | 31.06085 | P62918                            | P62918                 | 60S ribosomal protein L8                          | Rpl8          |
| 27.84446 | 27.98685 | 27.87408 | Q3TZS3;G3X9Q1;Q61738              | Q3TZS3;G3X9Q1;Q61738   | Integrin alpha-7                                  | Itga7         |
| 23.94056 | 24.79947 | 24.03591 | Q3UHK6;B7ZNJ5;G3X907;A2ANL9;Q9W   | Q3UHK6                 | Teneurin-4                                        | Tenm4         |
| 28.76129 | 28.06085 | 28.04531 | Q61391;A0A0A6Y36;A0A0A6YWB9;AO    | Q61391                 | Nephrilysin                                       | Nme           |
| 27.75175 | 27.87408 | 27.87994 | Q640N1;A0A0R4J0C4;Q9D2L5          | Q640N1                 | Adipocyte enhancer-binding protein 1              | Aebp1         |
| 27.91456 | 28.03486 | 28.07623 | Q8C3V4;A0A087WSP5;Q99K94;P42225   | Q8C3V4;A0A087WSP5;Q9   | Signal transducer and activator of transcript     | Stat1         |
| 27.06085 | 27.28912 | 26.80193 | Q9JHF5;F6XRE6;F6ZFB8              | Q9JHF5                 | V-type proton ATPase subunit a                    | Tcirg1        |
| 30.48232 | 30.54812 | 30.46295 | Q9JHZ2                            | Q9JHZ2                 | Progressive ankylosis protein                     | Ankh          |
| 28.95947 | 28.89735 | 28.98956 | A0A1L1STE6;Q9D6R2                 | A0A1L1STE6;Q9D6R2      | Isocitrate dehydrogenase [NAD] subunit, mi        | Idh3a         |
| 29.25124 | 29.16758 | 29.23078 | A2AMW0;F7CAZ6                     | A2AMW0;F7CAZ6          | Capping protein (Actin filament) muscle Z-lir     | Capzb         |
| 27.42342 | 27.15074 | 27.19835 | E9Q800;Q8CAQ8;E9QAY6;A0A0U1RQ14   | E9Q800;Q8CAQ8;E9QAY6   | MICOS complex subunit MIC60;MICOS com             | Immt          |
| 28.84745 | 28.74214 | 28.83545 | G3UZI2;A0A0R4J259;G3V018;Q7TMK9;  | G3UZI2;A0A0R4J259;G3V0 | Heterogeneous nuclear ribonucleoprotein C         | Syncrip       |
| 27.67976 | 27.66628 | 27.61105 | O88325                            | O88325                 | Alpha-N-acetylglucosaminidase                     | Naglu         |
| 28.88285 | 28.7706  | 29.0531  | O88685;A2AGN7;B7ZCF1;F6Q2E3       | O88685;A2AGN7;B7ZCF1   | 26S proteasome regulatory subunit 6A              | Psmc3         |
| 30.02168 | 30.07368 | 30.07368 | P10605                            | P10605                 | Cathepsin B                                       | Ctsb          |
| 31.06728 | 31.00838 | 30.98142 | P14131                            | P14131                 | 40S ribosomal protein S16                         | Rps16         |
| 29.3869  | 29.47267 | 29.36828 | P15864                            | P15864                 | Histone H1.2                                      | Hist1h1c      |
| 29.74695 | 29.72273 | 29.91171 | P20060                            | P20060                 | Beta-hexosaminidase subunit beta                  | Hexb          |
| 31.94698 | 31.97801 | 31.81192 | P25444;A0A140T8L5;D3YVC1;D3YWJ3;  | P25444;A0A140T8L5;D3Y  | 40S ribosomal protein S2;Ribosomal protein        | Rps2;Rps2-ps6 |
| 29.00035 | 29.00303 | 28.99766 | P29758                            | P29758                 | Ornithine aminotransferase, mitochondrial         | Oat           |
| 29.3452  | 29.30008 | 29.27586 | P61161                            | P61161                 | Actin-related protein 2                           | Actr2         |

|          |          |          |                                   |                        |                                                |                 |
|----------|----------|----------|-----------------------------------|------------------------|------------------------------------------------|-----------------|
| 29.11892 | 29.13614 | 29.12139 | P61979;B2M1R6;A0A286YDM3;H3BK9    | P61979;B2M1R6;A0A286Y  | Heterogeneous nuclear ribonucleoprotein K      | Hnrnpk          |
| 31.65438 | 31.70882 | 31.65438 | P62242                            | P62242                 | 40S ribosomal protein S8                       | Rps8            |
| 30.48232 | 30.50142 | 30.57542 | P67778;Q5SQG5                     | P67778;Q5SQG5          | Prohibitin;Prohibitin (Fragment)               | Phb             |
| 31.27031 | 31.22504 | 31.16639 | Q3TML0                            | Q3TML0                 | Protein disulfide-isomerase A6                 | Pdia6           |
| 31.09899 | 31.20769 | 31.19013 | Q5SW88;Q5SW87;Q5SW86              | Q5SW88;Q5SW87          | RAB1A, member RAS oncogene family              | Rab1a           |
| 30.96086 | 31.04791 | 30.98821 | Q60930;G3UX26;A0A286YCR8;D3YZT5;  | Q60930;G3UX26;A0A286Y  | Voltage-dependent anion-selective channel      | Vdac2           |
| 28.0296  | 27.94838 | 27.94838 | Q64737;D6RCG1                     | Q64737                 | Trifunctional purine biosynthetic protein ad   | Gart            |
| 28.5969  | 28.5969  | 28.45905 | Q6PE70;G5E8F8;O70309              | Q6PE70;G5E8F8;O70309   | Integrin beta;Integrin beta-5                  | Itgb5           |
| 27.63893 | 27.61807 | 27.55362 | Q6Q899;A2AP29                     | Q6Q899;A2AP29          | Probable ATP-dependent RNA helicase DDX        | Ddx58           |
| 29.04009 | 29.0531  | 29.0296  | Q99MN1;Q8R2P8                     | Q99MN1;Q8R2P8          | Lysine--tRNA ligase                            | Kars            |
| 31.11148 | 31.08639 | 31.0927  | Q9DBJ1;O70250                     | Q9DBJ1                 | Phosphoglycerate mutase 1                      | Pgam1           |
| 30.77706 | 30.74535 | 30.75334 | Q9Z1Q5                            | Q9Z1Q5                 | Chloride intracellular channel protein 1       | Clic1           |
| 28.65608 | 28.64238 | 28.75494 | A0A0R4J0G0;Q8BH04;Q9Z2V4          | A0A0R4J0G0;Q8BH04      | Phosphoenolpyruvate carboxykinase [GTP];       | Pck2            |
| 30.02168 | 30.20769 | 29.95394 | A2ACG7;Q9DBG6                     | A2ACG7;Q9DBG6          | Dolichyl-diphosphooligosaccharide--protein     | Rpn2            |
| 27.69975 | 27.48616 | 27.5969  | E9PYG6;A0A286YDU0                 | E9PYG6;A0A286YDU0      | RAS p21 protein activator 1;RAS p21 protein    | Rasa1           |
| 30.14831 | 30.12386 | 30.08639 | E9Q452;Q8BSH3;E9Q454;P58771;S4R21 | E9Q452;Q8BSH3;E9Q454;  | Tropomyosin alpha-1 chain                      | Tpm1            |
| 29.4334  | 29.4334  | 29.4073  | F8WVW2;Q60854;K7E6F1;E9Q008       | F8WVW2;Q60854;K7E6F1;E | Serine (or cysteine) peptidase inhibitor, clad | Serpinb6a;Serpi |
| 23.70767 | 23.58692 | 22.87643 | G3XA35;E9PYH0;Q62059;E9QMK3;E9Q1  | G3XA35;E9PYH0;Q62059;E | MCG116562, isoform CRA_a;Versican core p       | Vcan            |
| 27.15074 | 27.13124 | 27.13124 | G5E8D6;Q9WVJ9;E9Q3N9;E9Q3F3;F6Z1  | G5E8D6;Q9WVJ9;E9Q3N9   | EGF-containing fibulin-like extracellular mat  | Efemp2          |
| 29.5591  | 29.54628 | 29.59335 | O09131;D3Z1Q9;Q8K2Q2              | O09131                 | Glutathione S-transferase omega-1              | Gsto1           |
| 28.07623 | 28.11148 | 28.16519 | O55222;D3YZA5;A0A1B0GRF6          | O55222;D3YZA5          | Integrin-linked protein kinase;Integrin-linke  | Ikk             |
| 31.37244 | 31.30334 | 31.30334 | P14206;A0A1L1SUK3;A0A1L1SRW0      | P14206;A0A1L1SUK3      | 40S ribosomal protein SA                       | Rpsa            |
| 26.77706 | 26.86231 | 26.85043 | P24527                            | P24527                 | Leukotriene A-4 hydrolase                      | Lta4h           |
| 27.08132 | 27.0296  | 27.14102 | P26043;Q7TSG6                     | P26043;Q7TSG6          | Radixin                                        | Rdx             |
| 29.02697 | 29.19601 | 29.13858 | P32921                            | P32921                 | Tryptophan--tRNA ligase, cytoplasmic           | Wars            |
| 30.87555 | 30.91883 | 30.88285 | P35279                            | P35279                 | Ras-related protein Rab-6A                     | Rab6a           |
| 29.73892 | 29.77235 | 29.72436 | P50247;A2ALT5                     | P50247                 | Adenosylhomocysteinase                         | Ahcy            |
| 30.78488 | 30.79266 | 30.64581 | P51150;A0A0N4SVG9;A0A0N4SVR6      | P51150                 | Ras-related protein Rab-7a                     | Rab7a           |
| 27.65267 | 27.73247 | 27.61105 | P51660                            | P51660                 | Peroxisomal multifunctional enzyme type 2      | Hsd17b4         |
| 30.12386 | 30.13614 | 30.00838 | P53994;G3UXQ7;G3V022;A0A1D5RMH1   | P53994                 | Ras-related protein Rab-2A                     | Rab2a           |
| 28.90024 | 28.98414 | 28.90885 | P54822;E9Q242;E9Q3T7;A0A140LHU1;F | P54822;E9Q242;E9Q3T7   | Adenylosuccinate lyase                         | Adsl            |
| 30.78488 | 30.83092 | 30.72923 | P61982                            | P61982                 | 14-3-3 protein gamma                           | Ywhag           |
| 28.42342 | 28.45513 | 28.40324 | P62192                            | P62192                 | 26S proteasome regulatory subunit 4            | Psmc1           |
| 29.02433 | 29.2007  | 29.15316 | P62196;Q8K1K2                     | P62196;Q8K1K2          | 26S proteasome regulatory subunit 8            | Psmc5           |
| 31.2135  | 31.30334 | 31.25912 | P62281;A0A1B0GRR3;A0A1B0GSE8      | P62281;A0A1B0GRR3;A0A  | 40S ribosomal protein S11;40S ribosomal pr     | Rps11           |
| 30.96774 | 31.08639 | 31.04791 | P62754                            | P62754                 | 40S ribosomal protein S6                       | Rps6            |
| 30.94698 | 30.94    | 30.95394 | P62874;H3BKR2;H3BLF7              | P62874;H3BKR2          | Guanine nucleotide-binding protein G(i)/G(s)   | Gnb1            |
| 28.88577 | 28.82335 | 28.87701 | Q3U4W8;P56399;D3YYA5;D3Z4K7       | Q3U4W8;P56399          | Ubiquitinyl hydrolase 1;Ubiquitin carboxyl-t   | Usp5            |
| 28.48999 | 28.58978 | 28.43141 | Q3UZ39;A0A087W5F5;E9Q9T1;A0A087   | Q3UZ39                 | Leucine-rich repeat flightless-interacting pro | Lrrfip1         |
| 26.98685 | 26.69975 | 26.9428  | Q5SYD0                            | Q5SYD0                 | Unconventional myosin-ld                       | Myo1d           |
| 24.72858 | 25.80193 | 25.87877 | Q61001                            | Q61001                 | Laminin subunit alpha-5                        | Lama5           |
| NaN      | 21.01563 | NaN      | Q64277;A0A0R4I190                 | Q64277;A0A0R4I190      | ADP-ribosyl cyclase/cyclic ADP-ribose hydro    | Bst1            |
| 28.39509 | 28.57542 | 28.37865 | Q6P9J9                            | Q6P9J9                 | Anoctamin-6                                    | Ano6            |
| 27.22619 | 27.11148 | 27.50142 | Q6PB66                            | Q6PB66                 | Leucine-rich PPR motif-containing protein, n   | Lrrppc          |
| 31.00838 | 31.02828 | 31.04791 | Q6ZVW3;I7HLV2;P86048;A0A1B0GXC3   | Q6ZVW3;I7HLV2;P86048   | 60S ribosomal protein L10;60S ribosomal pr     | Rpl10;Rpl1      |
| 27.84446 | 27.76446 | 27.80809 | Q8BFR4;A0A1W2P8D3;A0A1W2P6W9      | Q8BFR4                 | N-acetylglucosamine-6-sulfatase                | Gns             |
| 28.42742 | 28.41538 | 28.46295 | Q8BFR5;A0A0U1RPC4;A0A0U1RNQ6      | Q8BFR5                 | Elongation factor Tu, mitochondrial            | Tufm            |
| 26.97596 | 26.95394 | 26.75175 | Q8BH59;V9GX9                      | Q8BH59                 | Calcium-binding mitochondrial carrier prote    | Slc25a12        |
| 26.75175 | 27.00838 | 26.78955 | Q8C2E7                            | Q8C2E7                 | WASH complex subunit 5                         | Washc5          |
| 27.83846 | 27.75812 | 27.78955 | Q8JZQ9;A0A0G2JG48                 | Q8JZQ9                 | Eukaryotic translation initiation factor 3 sub | Eif3b           |
| 28.41941 | 28.4746  | 28.48999 | Q8R1Q8                            | Q8R1Q8                 | Cytoplasmic dynein 1 light intermediate cha    | Dync1li1        |
| 30.88285 | 30.82335 | 30.82335 | Q8VEM8;G5E902                     | Q8VEM8;G5E902          | Phosphate carrier protein, mitochondrial;M     | Slc25a3         |
| 26.51352 | 26.68646 | 26.75175 | Q91V35;P18052;A0A1B0GRH2;A0A1B0   | Q91V35;P18052          | Receptor-type tyrosine-protein phosphatase     | Ptpr            |
| 29.52962 | 29.6764  | 29.60576 | Q91V41;A2AL34                     | Q91V41;A2AL34          | Ras-related protein Rab-14                     | Rab14           |
| 28.12139 | 27.75175 | 27.75812 | Q921L6;Q60598                     | Q921L6;Q60598          | Cortactin, isoform CRA_a;Src substrate corta   | Cttn            |
| 28.74535 | 28.85341 | 28.83244 | Q99JH4;A0A286YDWH                 | Q99JH4                 | 26S proteasome non-ATPase regulatory sub       | Psm6            |
| 28.05569 | 28.16039 | 28.13124 | Q9CZW4;E9PUC2;D3Z4I4              | Q9CZW4;E9PUC2          | Long-chain-fatty-acid--CoA ligase 3            | Acs13           |
| 27.06085 | 27.10149 | 26.75175 | Q9D0E1;B8JK33;B8JK32;F6W322;F7C9  | Q9D0E1;B8JK33;B8JK32   | Heterogeneous nuclear ribonucleoprotein M      | Hnrnp           |
| 28.90311 | 28.91456 | 28.94838 | Q9D0K2;Q3UJQ9                     | Q9D0K2;Q3UJQ9          | Succinyl-CoA:3-ketoacid coenzyme A transfe     | Oxc11           |
| 29.53519 | 29.54259 | 29.50142 | Q9DBS1                            | Q9DBS1                 | Transmembrane protein 43                       | Tmem43          |
| 32.36202 | 32.49667 | 32.43092 | Q9DCN2;F2Z456;A0A0A0MQM3          | Q9DCN2;F2Z456;A0A0A0M  | NADH-cytochrome b5 reductase 3;NADH-cy         | Cyb5r3          |
| 27.58978 | 27.07112 | 27.1795  | Q9QUR8                            | Q9QUR8                 | Semaphorin-7A                                  | Sema7a          |
| 28.4746  | 28.3869  | 28.34942 | Q9QZES;Q7TNQ1;Q9QXK3              | Q9QZES                 | Coatomer subunit gamma-1                       | Copg1           |
| 28.37451 | 28.49762 | 28.20303 | Q9R1J0                            | Q9R1J0                 | Sterol-4-alpha-carboxylate 3-dehydrogenase     | Nsdhl           |
| 28.39509 | 28.47846 | 28.39917 | A0A0A6YY47;P13595;A0A0A6YY91;E9Q  | A0A0A6YY47;P13595;A0A  | Neural cell adhesion molecule 1                | Ncam1           |
| 26.58978 | 26.42982 | 26.93157 | A0A0R4J1G9;E9QN92;Q8C159;D3YTP0   | A0A0R4J1G9;E9QN92;Q8C  | Metalloredutase STEAP3                         | Steap3          |
| 27.5389  | 27.71293 | 27.45513 | B1AXN9;P18654;B1AXP0;G3UZ13;E9PW  | B1AXN9;P18654          | Ribosomal protein S6 kinase alpha-3            | Rps6ka3         |
| 27.2535  | 27.43936 | 27.13124 | D3Z158;Q8BML9;A0A140LH2;A0A0A6    | D3Z158;Q8BML9          | Glutamine--tRNA ligase                         | Qars            |
| 27.49381 | 27.56819 | 27.61105 | E9Q175;E9Q3L1;E9PVU0;E9Q174;V9GX  | E9Q175;E9Q3L1;E9PVU0;E | Unconventional myosin-VI                       | Myo6            |
| 27.58978 | 27.77077 | 27.71293 | E9Q634;A0A1L1STM1                 | E9Q634                 | Unconventional myosin-le                       | Myo1e           |
| 25.70767 | 25.57831 | 25.85994 | E9Q6R7;A0A1W2P7C0;Q61636;A0A1W    | E9Q6R7;A0A1W2P7C0;Q6   | Utrophin;G-utrophin (Predicted protein)        | Utrn            |
| 28.87115 | 28.80809 | 28.94838 | E9Q9F5;E9Q1G8;O55131              | E9Q9F5;E9Q1G8;O55131   | Septin-7                                       | Sept7           |
| 27.19835 | 27.04009 | 27.00838 | E9QNX9;Q60751                     | E9QNX9;Q60751          | Tyrosine-protein kinase receptor;Insulin-like  | Igf1r           |
| 30.96774 | 31.0544  | 30.96086 | F6YVP7;P62270;S4R1N6;A0A1Y7VKY1   | F6YVP7;P62270;S4R1N6;A | Predicted gene 10260;40S ribosomal protein     | Gm10260;Rps11   |
| 31.24785 | 31.23649 | 31.15436 | H3BKH6;Q9R0P3;H3BLJ9;H3BLJ6;H3BJP | H3BKH6;Q9R0P3;H3BLJ9;H | S-formylglutathione hydrolase                  | Emd             |
| 28.87408 | 28.82941 | 28.97596 | O08749                            | O08749                 | Dihydrolipoyl dehydrogenase, mitochondria      | Dld             |
| 30.21928 | 30.20769 | 30.11148 | O08807;B1AZS9                     | O08807;B1AZS9          | Peroxioredoxin-4;Peroxioredoxin-4 (Fragment)   | Prdx4           |
| 30.06085 | 30.09899 | 29.98142 | O35129;F6QPR1;F6Q8V7              | O35129;F6QPR1          | Prohibitin-2;Prohibitin-2 (Fragment)           | Phb2            |
| 25.99335 | 25.92705 | 25.98033 | O35375                            | O35375                 | Neuropilin-2                                   | Nrp2            |
| 29.13369 | 29.21234 | 29.10899 | O70435;E0CX62;E0CZ34;F8WH02;E0CY  | O70435;E0CX62          | Proteasome subunit alpha type-3;Proteasom      | Psm3            |
| 27.72598 | 28.14589 | 27.95947 | O88569;A0A0N4SUM2                 | O88569;A0A0N4SUM2      | Heterogeneous nuclear ribonucleoproteins       | Hnrnpa2b1       |
| 30.12386 | 30.21928 | 30.18423 | P06797;A0A1Y7VNM3;A0A1Y7VNM4;A0   | P06797;A0A1Y7VNM3;A0   | Cathepsin L1;Cathepsin L1 (Fragment)           | Ctsl            |
| 27.98142 | 28.02433 | 28.16519 | P21279;P30677                     | P21279                 | Guanine nucleotide-binding protein (G) sub     | Gnaq            |
| 28.41538 | 28.35363 | 28.48616 | P21550;Q5SX59;J3QPZ9;Q5SX60;Q5SX6 | P21550                 | Beta-enolase                                   | Eno3            |
| 28.24898 | 28.4073  | 28.4512  | P21981;G3UXE8                     | P21981                 | Protein-glutamine gamma-glutamyltransfer       | Tgm2            |
| 27.46295 | 27.53148 | 27.63893 | P23780;A0A1L1SSJ7                 | P23780                 | Beta-galactosidase                             | Glb1            |
| 28.02433 | 28.12633 | 27.98685 | P24547;A0A0A6YY72;A0A0A6YX54      | P24547;A0A0A6YY72      | Inosine-5-monophosphate dehydrogenase 2        | Impdh2          |
| 28.75494 | 28.94    | 28.88285 | P30416;F6S2D5;F7CAT1              | P30416;F6S2D5;F7CAT1   | Peptidyl-prolyl cis-trans isomerase FKBP4;P    | Fkbp4           |



|          |          |          |                                        |                        |                                                |                 |
|----------|----------|----------|----------------------------------------|------------------------|------------------------------------------------|-----------------|
| 32.85155 | 32.69851 | 32.73933 | P14069                                 | P14069                 | Protein S100-A6                                | S100a6          |
| 34.06728 | 34.02663 | 33.90634 | P16045                                 | P16045                 | Galectin-1                                     | Lgals1          |
| 32.27864 | 32.2106  | 32.11768 | P17742;A0A11SST0;F8VPN3;A0A11SR        | P17742;A0A11SST0       | Peptidyl-prolyl cis-trans isomerase A;Peptidyl | Ppia            |
| 28.48616 | 28.53519 | 28.46295 | P22437                                 | P22437                 | Prostaglandin G/H synthase 1                   | Ptgs1           |
| 29.78644 | 29.82639 | 29.68479 | P24369                                 | P24369                 | Peptidyl-prolyl cis-trans isomerase B          | Ppib            |
| 25.46139 | 25.56964 | 25.73117 | P25206                                 | P25206                 | DNA replication licensing factor MCM3          | Mcm3            |
| 28.90885 | 28.52028 | 29.15798 | P47739;B1AT16                          | P47739                 | Aldehyde dehydrogenase, dimeric NADP-prec      | Aldh3a1         |
| 27.99226 | 28.05569 | 28.06085 | P60122;D3YW60                          | P60122                 | RuvB-like 1                                    | Ruvb1           |
| 30.04791 | 30.13614 | 30.03486 | P62827;Q14AA6;Q61820                   | P62827;Q14AA6          | GTP-binding nuclear protein Ran                | Ran;1700009N1   |
| 30.00838 | 29.95394 | 29.81115 | P63242;A0A0A0MQM0;J3QP58;Q8BGY         | P63242;A0A0A0MQM0      | Eukaryotic translation initiation factor 5A-1, | Eif5a           |
| 31.98821 | 31.87921 | 32.16639 | P68033;P68134;A0A1D5RM20               | P68033;P68134          | Actin, alpha cardiac muscle 1;Actin, alpha sk  | Actc1;Acta1     |
| 23.80931 | 22.19761 | 22.94235 | P97333                                 | P97333                 | Neuropilin-1                                   | Nrp1            |
| 27.68646 | 27.85043 | 27.85043 | P97807;H3BKG7                          | P97807                 | Fumarate hydratase, mitochondrial              | Fh              |
| 26.57398 | 26.65949 | 26.69975 | Q06890;E9PUU2;E9PXG5;E9Q8Y5;E9Q9       | Q06890;E9PUU2;E9PXG5;  | Clusterin;Clusterin (Fragment)                 | Clu             |
| 27.94838 | 27.82639 | 27.95394 | Q3TDN2;D3Z2H4;D3YUP4;D6RE51;D3Z4       | Q3TDN2;D3Z2H4          | FAS-associated factor 2;FAS-associated facto   | Faf2            |
| 25.24264 | 25.29614 | 24.56384 | Q3UH60;B2RQC7;D3Z5G8                   | Q3UH60;B2RQC7;D3Z5G8   | Disco-interacting protein 2 homolog B;DIP2     | Dip2b           |
| 28.21527 | 28.3869  | 28.15557 | Q543K9;P23492;Q9D8C9                   | Q543K9;P23492;Q9D8C9   | Purine nucleoside phosphorylase                | Pnp;Pnp2        |
| 27.65267 | 27.89735 | 28.10149 | Q5PRF0                                 | Q5PRF0                 | HEAT repeat-containing protein 5A              | Heatr5a         |
| 29.15798 | 29.04791 | 29.27364 | Q61335                                 | Q61335                 | B-cell receptor-associated protein 31          | Bcap31          |
| 27.33245 | 27.26249 | 27.08132 | Q6PDI5;A2ALV7;A2ALV6                   | Q6PDI5;A2ALV7          | Proteasome-associated protein ECM29 hom        | Ecm29;Ai31418   |
| 27.87994 | 27.87408 | 27.95947 | Q8BMF4                                 | Q8BMF4                 | Dihydrolypoyllysine-residue acetyltransferas   | Dlat            |
| 26.4567  | 26.33245 | 26.83846 | Q8CG48;B1AWH6                          | Q8CG48;B1AWH6          | Structural maintenance of chromosomes pro      | Smc2            |
| 27.45513 | 27.37451 | 27.24445 | Q8QZT1                                 | Q8QZT1                 | Acetyl-CoA acetyltransferase, mitochondrial    | Acat1           |
| 28.05051 | 28.11148 | 28.10149 | Q8QZY1                                 | Q8QZY1                 | Eukaryotic translation initiation factor 3 sub | Eif3l           |
| 28.76446 | 28.80809 | 28.5969  | Q8R050;Q149F3;F7CE88                   | Q8R050                 | Eukaryotic peptide chain release factor GTP-   | Gsp1            |
| 27.38278 | 27.57542 | 27.42342 | Q8VCT3;E9PYF1                          | Q8VCT3;E9PYF1          | Aminopeptidase B                               | Rnpep           |
| 28.69312 | 28.56092 | 28.80193 | Q9CPX4;P29391;A0A1B0GR60;P49945;       | Q9CPX4;P29391;A0A1B0GR | Ferritin;Ferritin light chain 1                | Ftl1            |
| 28.52028 | 28.53519 | 28.61105 | Q9CYP7;A0A0G2JEM7                      | Q9CYP7                 | Cytosol aminopeptidase                         | Lap3            |
| 29.09144 | 29.04791 | 28.96774 | Q9D8W5;B1AT36;Q3TRH2                   | Q9D8W5;B1AT36;Q3TRH2   | 26S proteasome non-ATPase regulatory sub       | Psm12           |
| 28.21697 | 28.45905 | 28.30661 | Q9DB77;A0A140L198                      | Q9DB77;A0A140L198      | Cytochrome b-c1 complex subunit 2, mitoch      | Uqcrc2          |
| 27.98685 | 28.01903 | 27.73247 | Q9DCW4;A0A0U1RNP5;A0A0N4SVE0;A         | Q9DCW4;A0A0U1RNP5;A0   | Electron transfer flavoprotein subunit beta;   | Etfb            |
| 26.83846 | 26.85043 | 27.23535 | Q9EQH2;A0A1Y7VMT6;A0A1Y7VNY4           | Q9EQH2                 | Endoplasmic reticulum aminopeptidase 1         | Erap1           |
| 28.28472 | 28.32389 | 28.3452  | Q9ESU7;P51912                          | Q9ESU7;P51912          | Amino acid transporter;Neutral amino acid      | Sic1a5          |
| 30.29789 | 30.40324 | 30.23078 | Q9QUI0;A0A0A6YXF6;Q9CR99;A0A0A6        | Q9QUI0;A0A0A6YXF6      | Transforming protein RhoA;Transforming pr      | Rhoa            |
| 26.10149 | 26.36286 | 26.67303 | Q9ROE1;F6W3Q8                          | Q9ROE1                 | Procollagen-lysine, 2-oxoglutarate 5-dioxyge   | Plod3           |
| 27.86231 | 27.86821 | 27.80193 | Q9ROX4;Q32MW3                          | Q9ROX4;Q32MW3          | Acyl-coenzyme A thioesterase 9, mitochon       | Acot9;Acot10    |
| 29.2535  | 29.33884 | 29.33671 | Q9WVA4;A0A0A6YXG6;Q9R1Q8               | Q9WVA4;A0A0A6YXG6      | Transgelin-2;Transgelin-2 (Fragment)           | Tagln2          |
| 29.33458 | 29.37244 | 29.26024 | Q9Z2U0;Q9CWH6                          | Q9Z2U0                 | Proteasome subunit alpha type-7                | Psm7            |
| 27.34096 | 27.3662  | 27.31527 | Z4YJV4;Q60597;E9Q7L0;Q5SVY1;Q5SVY      | Z4YJV4;Q60597          | 2-oxoglutarate dehydrogenase, mitochon         | Gdh             |
| 25.53445 | 25.43301 | 25.49838 | A0A087WNNM1;Q91Z67;A0A087WNN1;Q91Z67;A | A0A087WNNM1;Q91Z67;A   | SLIT-ROBO Rho GTPase-activating protein 2      | Srgap2          |
| 24.89966 | 25.98468 | 25.56964 | A0A0R41D0;P59108;A0A1D5RLP0            | A0A0R41D0;P59108       | Copine-2                                       | Cpne2           |
| 26.06497 | 26.33926 | 26.48922 | A0A0R4J1Q0;G5E896;Q3UJ89;D6RE33        | A0A0R4J1Q0;G5E896;Q3U  | Enhancer of mRNA-decapping protein 4;Enh       | Edc4            |
| 26.13712 | 26.28207 | 26.16039 | A0A140T819;E9Q3L2;D6RUG6;F6XSW4;F      | A0A140T819;E9Q3L2      | Phosphatidylinositol 4-kinase alpha            | Pi4ka           |
| 29.58799 | 29.72436 | 29.76446 | A0A140T8M7;P62751;D3YTY6               | A0A140T8M7;P62751      | Ribosomal protein L23A, pseudogene 3;60S       | Rpl23a-ps3;Rpl2 |
| 24.24627 | 24.1488  | 22.44    | A0A1W2P6L9;Q3UQ28;D3Z5M7               | A0A1W2P6L9;Q3UQ28      | Peroxidase homolog                             | Pxdn            |
| 25.34096 | 25.10949 | 25.35783 | A2AH85;O08810;G3UZ34;G3UXK8            | A2AH85;O08810;G3UZ34   | 116 kDa US small nuclear ribonucleoprotein     | Eftud2          |
| 26.4073  | 26.73892 | 26.72598 | A2AL85;Q8BSY0;Q8CBM2;A2AL83;A2AL       | A2AL85;Q8BSY0;Q8CBM2   | Aspartyl/asparaginyl beta-hydroxylase          | Asph            |
| 26.52402 | 26.61807 | 26.52552 | A2AW86;Q60767                          | A2AW86;Q60767          | Lymphocyte antigen 75                          | Lyt75           |
| 26.75175 | 26.77706 | 26.71293 | D3Z061;Q8C7R4                          | D3Z061;Q8C7R4          | Ubiquitin-like modifier-activating enzyme 6    | Uba6            |
| 31.34096 | 31.47267 | 31.42842 | E9QAZ2;Q9CZM2;B8JJK2                   | E9QAZ2;Q9CZM2          | Ribosomal protein L15;60S ribosomal protei     | Gm10020;Rpl15   |
| 26.61807 | 26.61807 | 26.37451 | F8VQJ3;P02468;F6TLW1                   | F8VQJ3;P02468          | Laminin subunit gamma-1                        | Lamc1           |
| 27.26249 | 27.22619 | 27.26249 | G3X8Y3;Q80UM3;A0A0A6YW80;A0A0A         | G3X8Y3;Q80UM3;A0A0A6   | N-alpha-acetyltransferase 15, NatA auxiliary   | Naa15           |
| 25.52253 | 26.23535 | 26.21327 | G5E866;Q99N89                          | G5E866;Q99N89          | Splicing factor 3B subunit 1                   | Sf3b1           |
| 30.34096 | 30.26472 | 30.20769 | K3W4Q8;P18572;J3QP71                   | K3W4Q8;P18572;J3QP71   | Basigin;Basigin (Fragment)                     | Bsg             |
| 25.83123 | 26.1035  | 25.74407 | O35350                                 | O35350                 | Calpain-1 catalytic subunit                    | Capn1           |
| 27.62506 | 27.66628 | 27.52402 | O88544;D3YV99;F6QTS1;D3Z1R9            | O88544;D3YV99;F6QTS1;  | COP9 signalosome complex subunit 4;COP9        | Cops4           |
| 29.51841 | 29.1795  | 28.93719 | O89051                                 | O89051                 | Integral membrane protein 2B                   | Itm2b           |
| 28.73247 | 28.91171 | 28.75175 | P01899;V9GXI3;G3UX20;G3UZP7;F6VXI      | P01899                 | H-2 class I histocompatibility antigen, D-B al | H2-D1           |
| 30.08639 | 29.96774 | 30.00838 | P08030;A0A1D5RLR6                      | P08030                 | Adenine phosphoribosyltransferase              | AdP             |
| 29.51465 | 29.461   | 29.54628 | P08228                                 | P08228                 | Superoxide dismutase [Cu-Zn]                   | Sod1            |
| 25.90426 | 26.06085 | 25.87173 | P12265;Q99KJ6;D3YY48                   | P12265                 | Beta-glucuronidase                             | Gusb            |
| 27.41538 | 27.46295 | 27.07112 | P29416                                 | P29416                 | Beta-hexosaminidase subunit alpha              | Hexa            |
| 28.87701 | 28.98414 | 28.98685 | P42208;E9Q3V6;F6WYMO;D3YYB1;D3Z        | P42208;E9Q3V6;F6WYMO   | Septin-2;Septin-2 (Fragment)                   | Sept2           |
| 27.97049 | 28.15557 | 28.00303 | P46978;D3YZN5                          | P46978                 | Dolichyl-diphosphooligosaccharide--protein     | Stt3a           |
| 29.15798 | 29.24898 | 29.38072 | P47754;D6RCW7;A0A0N4SVM0               | P47754;D6RCW7          | F-actin-capping protein subunit alpha-2        | Capa2           |
| 29.91171 | 29.86231 | 29.56638 | P51410;A0A0G2JES3;A0A140T8T4;D3Z       | P51410;A0A0G2JES3;A0A  | 60S ribosomal protein L9;60S ribosomal pro     | Rpl9            |
| 27.65267 | 27.86231 | 27.89735 | P57716                                 | P57716                 | Nicastrin                                      | Ncstn           |
| 30.52028 | 30.48232 | 30.40324 | P60766;G3UZM2;D3Z3L1;F2Z463;D3YX       | P60766                 | Cell division control protein 42 homolog       | Cdc42           |
| 30.61105 | 30.51089 | 30.35153 | P62245;F8WJ41;D3Z712;D3YVB4            | P62245;F8WJ41;D3Z712   | 40S ribosomal protein S15a;40S ribosomal p     | Rps15a          |
| 30.86821 | 30.91883 | 30.94698 | P62301;Q921R2;A0A0U1RQ71               | P62301;Q921R2          | 40S ribosomal protein S13                      | Rps13           |
| 30.24218 | 30.13614 | 30.09899 | P62911;P17932                          | P62911                 | 60S ribosomal protein L32                      | Rpl32           |
| 29.80347 | 29.86821 | 29.67135 | P84078;P61205;Q8BSL7;A2A6T9            | P84078;P61205;Q8BSL7   | ADP-ribosylation factor 1;ADP-ribosylation f   | Arf1;Arf3;Arf2  |
| 30.04791 | 30.07368 | 30.00838 | P97370                                 | P97370                 | Sodium/potassium-transporting ATPase sub       | Atp1b3          |
| 29.14831 | 28.98685 | 28.95116 | P97372;G3X9V0;E0CZ90                   | P97372;G3X9V0          | Proteasome activator complex subunit 2;MC      | Psm2e           |
| 26.46607 | 26.56092 | 26.33415 | Q01279;Q9WVVF5;B2KGF7;P70424;Q61       | Q01279;Q9WVVF5         | Epidermal growth factor receptor               | Egfr            |
| 26.63201 | 26.69975 | 27.16039 | Q04736;A0A0J9YUV2;F6UND7;A0A087V       | Q04736                 | Tyrosine-protein kinase Yes                    | Yes1            |
| 26.45983 | 26.32903 | 27.08132 | Q05769                                 | Q05769                 | Prostaglandin G/H synthase 2                   | Ptgs2           |
| 29.509   | 29.64753 | 29.55179 | Q3TMX0;O08992;H3BLG5;A2AKJ9;A2AK       | Q3TMX0;O08992;H3BLG5   | MCG4375, isoform CRA_b;Syntenin-1;Synte        | Sdcbp           |
| 27.26249 | 27.82031 | 27.33245 | Q3UKC1;D3Z715;D3Z213;D3Z152            | Q3UKC1                 | Tax1-binding protein 1 homolog                 | Tax1bp1         |
| 25.60116 | 25.74919 | 26.1332  | Q3UMB9;A0A1W2P6V9                      | Q3UMB9                 | WASH complex subunit 4                         | Washc4          |
| 28.80809 | 28.88867 | 28.92025 | Q5NCU4;A0A1L1SSH9;P07214;Q5NCU3        | Q5NCU4;A0A1L1SSH9;P07  | SPARC                                          | Sparc           |
| 30.73731 | 30.64581 | 30.60222 | Q5XJF6;P53026;D6RE43                   | Q5XJF6;P53026          | Ribosomal protein;60S ribosomal protein L1     | Rpl10a          |
| 27.23535 | 27.30661 | 27.1795  | Q5XJY5                                 | Q5XJY5                 | Coatomer subunit delta                         | Arcn1           |
| 27.98685 | 28.01372 | 28.37036 | Q60737;A2ANR6;Q6N5S6                   | Q60737                 | Casein kinase II subunit alpha                 | Csnk2a1         |
| 28.33671 | 28.51653 | 28.45905 | Q61937;Q9DAY9;Q5SQB0;Q5SQB5            | Q61937;Q9DAY9;Q5SQB0   | Nucleophosmin                                  | Npm1            |
| 28.60752 | 28.65949 | 28.50522 | Q64674                                 | Q64674                 | Spermidine synthase                            | Srm             |
| 26.50294 | 26.37451 | 26.65949 | Q6A0A9                                 | Q6A0A9                 | Constitutive coactivator of PPAR-gamma-like    | FAM120A         |
| 26.21141 | 26.63201 | 26.61807 | Q6PE80;Q00993;F6YPR4                   | Q6PE80;Q00993          | Axl protein;Tyrosine-protein kinase receptor   | Axl             |

|          |          |          |                                         |                              |                                                                  |                 |
|----------|----------|----------|-----------------------------------------|------------------------------|------------------------------------------------------------------|-----------------|
| 27.68646 | 27.91456 | 27.65949 | Q8BXZ1                                  | Q8BXZ1                       | Protein disulfide-isomerase TMX3                                 | Tmx3            |
| 28.3662  | 28.49762 | 28.79266 | Q8CAY6;G3XA25;Q80X81;F2Z459             | Q8CAY6;G3XA25;Q80X81         | Acetyl-CoA acetyltransferase, cytosolic                          | Acat2           |
| 26.80193 | 26.76446 | 26.69975 | Q8CIN4;Q61036;A3KGC3;A3KGC4;A3KGC5      | Q8CIN4                       | Serine/threonine-protein kinase PAK 2                            | PaK2            |
| 26.96499 | 27.08132 | 27.12139 | Q8JZR0;A0A286YD68;A0A286YCF3;A0A286YD69 | Q8JZR0                       | Long-chain-fatty-acid-CoA ligase 5                               | Acs15           |
| 28.15557 | 28.09648 | 28.2535  | Q8K0C4                                  | Q8K0C4                       | Lanosterol 14-alpha-demethylase                                  | Cyp51a1         |
| 27.33245 | 27.32389 | 27.2535  | Q91VH2                                  | Q91VH2                       | Sorting nexin-9                                                  | Snx9            |
| 27.5389  | 27.5389  | 27.51653 | Q920A5                                  | Q920A5                       | Retinoid-inducible serine carboxypeptidase                       | Scpep1          |
| 26.85043 | 26.30661 | 26.61807 | Q921M7;Q8BHZ0                           | Q921M7                       | Protein FAM49B                                                   | Fam49b          |
| 29.54812 | 29.58441 | 29.69312 | Q922Q8                                  | Q922Q8                       | Leucine-rich repeat-containing protein 59                        | Lrrc59          |
| 26.1055  | 26.35448 | 25.96939 | Q99K70;B1AWT2;B1AWT3;Q7TT45;B1AWT4      | Q99K70;B1AWT2;B1AWT3         | Ras-related GTP-binding protein C; Ras-related                   | Rragc; Rragd    |
| 30.91883 | 31.00169 | 30.90455 | Q99PT1                                  | Q99PT1                       | Rho GDP-dissociation inhibitor 1                                 | Arhgdia         |
| 26.4008  | 26.63201 | 27.00838 | Q9CPU0                                  | Q9CPU0                       | Lactoylglutathione lyase                                         | Glo1            |
| 27.15074 | 27.1795  | 27.38278 | Q9CR16                                  | Q9CR16                       | Peptidyl-prolyl cis-trans isomerase D                            | Ppid            |
| 30.52028 | 30.5389  | 30.51089 | Q9CXW4;E9PYL9;A2BH06                    | Q9CXW4;E9PYL9;A2BH06         | 60S ribosomal protein L11; Predicted gene 11                     | Rpl11; Gm1003f  |
| 28.65949 | 28.82639 | 28.88867 | Q9CY58;A0A0N4SV32;Q3UMP4;A0A0N4SV33     | Q9CY58;A0A0N4SV32;Q3UMP4     | Plasminogen activator inhibitor 1 RNA-binding                    | Serbp1          |
| 28.58262 | 28.50142 | 28.5969  | Q9CZ13;A0A0A6YW82;A0A0A6YWX6            | Q9CZ13                       | Cytochrome b-c1 complex subunit 1, mitochondrial                 | Uqcrc1          |
| 28.52776 | 28.60399 | 28.54628 | Q9DBC7;A2AI69                           | Q9DBC7                       | cAMP-dependent protein kinase type I-alpha                       | Prkar1a         |
| 28.62157 | 28.59335 | 28.5969  | Q9DC51                                  | Q9DC51                       | Guanine nucleotide-binding protein (G) subunit                   | Gnai3           |
| 23.66492 | 24.02749 | 24.20955 | Q9JIK5                                  | Q9JIK5                       | Nucleolar RNA helicase 2                                         | Ddx21           |
| 25.85043 | 25.74919 | 26.07725 | Q9ROE2;A8Y5E6;F6WNR1                    | Q9ROE2                       | Procollagen-lysine, 2-oxoglutarate 5-dioxygenase                 | Pld1            |
| 27.62506 | 27.64581 | 27.98142 | Q9WUA2;A0A087WS08;A0A087WVW4;A0A087WVW5 | Q9WUA2                       | Phenylalanine--tRNA ligase beta subunit                          | Farsb           |
| 27.82639 | 27.69975 | 27.62506 | A0A0J9TY0;A0A0J9YUL3;Q8C1B7;A0A0J9YUL4  | A0A0J9TY0;A0A0J9YUL3         | Septin-11; Septin 11, isoform CRA_b                              | Sept11          |
| 27.69975 | 27.95394 | 28.0296  | B1AV77;B1ATIO;P47740;A0A140LF9          | B1AV77;B1ATIO;P47740         | Aldehyde dehydrogenase; Fatty aldehyde dehydrogenase             | Aldh3a2         |
| NaN      | NaN      | NaN      | E9QL12;E9PXU9;A0A0N4SUI2;E9Q423;E9Q424  | E9QL12;E9PXU9;A0A0N4SUI2     | Dysferlin                                                        | Dysf            |
| 24.72858 | 25.03591 | 24.58118 | E9QM38;P55012                           | E9QM38;P55012                | Solute carrier family 12 member 2                                | Slc12a2         |
| 26.46139 | 26.81421 | 26.87408 | F6RPJ9;Q9JHR7                           | F6RPJ9;Q9JHR7                | Insulin-degrading enzyme (Fragment); Insulin-degrading enzyme    | Ide             |
| 25.417   | 25.1795  | 25.239   | F8VPR2;A2APV2;E9PX6E;F6XR20;A2APV3      | F8VPR2;A2APV2;E9PX6E;F6XR20  | Formin-like protein 2                                            | Fmn12           |
| 29.35363 | 29.41538 | 29.31311 | F8WJK8;Q99L47;E9Q1V0;E9Q1X9             | F8WJK8;Q99L47                | Hsc70-interacting protein                                        | St13            |
| 26.14297 | 26.81421 | 26.81421 | H3BJU7;H3BJX8;H3BJ45;H3BJ40;H3BKH3      | H3BJU7;H3BJX8;H3BJ45;H3BJ40  | Rho guanine nucleotide exchange factor 2                         | Arhgef2         |
| 23.77957 | 22.9566  | 22.85567 | H3BKN0;Q1HFZ0                           | H3BKN0;Q1HFZ0                | tRNA (cytosine(34)-C(5))-methyltransferase                       | Nsun2           |
| 26.99766 | 26.93157 | 27.11148 | O08917;G3UYU4;G3UZZ5;G3UWWW8;G3UZZ6     | O08917;G3UYU4                | Flotillin-1                                                      | Flot1           |
| 28.27142 | 28.14589 | 28.01903 | O3S343;A0A0B4J1E7;D3YTN1                | O3S343;A0A0B4J1E7            | Importin subunit alpha-3                                         | Kpna4           |
| 27.89157 | 28.0296  | 28.00303 | P11440;D3Z2T9;Q80YP0;P97377;E3W91       | P11440;D3Z2T9                | Cyclin-dependent kinase 1; Cyclin-dependent kinase 2             | Cdk1            |
| 23.77957 | 23.42982 | 23.35111 | P15626;D3YX76;F6Y363                    | P15626;D3YX76                | Glutathione S-transferase Mu 2; Glutathione S-transferase Mu 2   | Gstm2           |
| 30.04791 | 30.04791 | 29.86378 | P17047                                  | P17047                       | Lysosome-associated membrane glycoprotein 2                      | Lamp2           |
| 27.2803  | 27.38278 | 27.39917 | P17427;A0A0J9YUA7;A0A140LHG0            | P17427                       | AP-2 complex subunit alpha-2                                     | Ap2a2           |
| 30.02168 | 30.12386 | 30.04791 | P19253;A0A1B0G5Q6;A0A1B0G5S6;A0A1B0G5R6 | P19253;A0A1B0G5Q6;A0A1B0G5S6 | 60S ribosomal protein L13a; 60S ribosomal protein L13a           | Rpl13a          |
| 26.60399 | 26.39264 | 26.69975 | P26231;Q65C11                           | P26231                       | Catenin alpha-1                                                  | Ctnna1          |
| 27.28912 | 27.45513 | 27.58978 | P28271;Q811J3                           | P28271                       | Cytoplasmic aconitate hydratase                                  | Aco1            |
| 29.44727 | 29.63027 | 29.55545 | P35282;A0A1W2P6Z4                       | P35282                       | Ras-related protein Rab-21                                       | Rab21           |
| 29.50711 | 28.72273 | 28.68646 | P40936                                  | P40936                       | Indolethylamine N-methyltransferase                              | Inmt            |
| 30.41337 | 30.42342 | 30.42342 | P41105;F6Z0X0                           | P41105                       | 60S ribosomal protein L28                                        | Rpl28           |
| 25.37119 | 24.74407 | 25.30313 | P48759                                  | P48759                       | Pentraxin-related protein PTX3                                   | Ptx3            |
| NaN      | NaN      | NaN      | P58022                                  | P58022                       | Lysyl oxidase homolog 2                                          | Lox12           |
| 27.78955 | 28.01372 | 27.82639 | P58242                                  | P58242                       | Acid sphingomyelinase-like phosphodiesterase 4                   | Smpd13b         |
| 29.92592 | 29.96774 | 29.96774 | P61255;B1ARA3;B1ARA5                    | P61255;B1ARA3;B1ARA5         | 60S ribosomal protein L26; 60S ribosomal protein L26             | Rpl26           |
| 30.42342 | 30.65438 | 30.59335 | P63325;Q3UW83                           | P63325;Q3UW83                | 40S ribosomal protein S10                                        | Rps10           |
| 29.4073  | 29.4649  | 29.48039 | P68510                                  | P68510                       | 14-3-3 protein eta                                               | Whhab           |
| 26.02749 | 25.98251 | 26.02115 | P70227;P11881                           | P70227                       | Inositol 1,4,5-trisphosphate receptor type 3                     | Itpr3           |
| 27.77077 | 27.67976 | 27.41538 | Q3TPJ8;A2BFF9;O88487;A2BFF8;A2BFF7      | Q3TPJ8;A2BFF9;O88487;A2BFF8  | Cytoplasmic dynein 1 intermediate chain 2                        | Dync1i2         |
| 26.90885 | 26.54481 | 26.95394 | Q45VK7;F6QLS2;A0A11L5R16;A0A11L5S15     | Q45VK7                       | Cytoplasmic dynein 2 heavy chain 1                               | Dync2h1         |
| 27.11148 | 27.44727 | 27.64581 | Q61035;G5E823;Q99K9                     | Q61035                       | Histidine-tRNA ligase, cytoplasmic                               | Hars            |
| 27.32389 | 27.27142 | 27.2803  | Q61792;A2A6G9;A2A6H0;A2A6G6;A2A6H1      | Q61792;A2A6G9;A2A6H0         | LIM and SH3 domain protein 1; LIM and SH3 domain protein 1       | Lasp1           |
| 30.39305 | 30.4334  | 30.31959 | Q64433                                  | Q64433                       | 10 kDa heat shock protein, mitochondrial                         | Hspe1           |
| 26.77706 | 26.58978 | 26.96499 | Q64521;A2AQR0                           | Q64521;A2AQR0                | Glycerol-3-phosphate dehydrogenase, mitochondrial                | Gpd2            |
| 26.22435 | 26.97596 | 25.33074 | Q6A099;Q6DFZ1;H3BLN1;H3BIX5;H3BLN2      | Q6A099;Q6DFZ1                | Golgi-specific brefeldin A-resistance factor 1                   | Gbf1            |
| 27.87408 | 27.90885 | 27.89735 | Q6PHN9;S4R1W7                           | Q6PHN9                       | Ras-related protein Rab-35                                       | Rab35           |
| 30.76129 | 30.74535 | 30.87555 | Q6ZWQ9;D3YV37;D3Z249                    | Q6ZWQ9                       | MCG5400                                                          | My12a           |
| 30.52962 | 30.45317 | 30.45317 | Q6ZWZ6;F7AEH4;A0A1W2P7A1;P63325         | Q6ZWZ6;F7AEH4;A0A1W2P7A1     | 40S ribosomal protein S12                                        | Rps12-ps3; Rps1 |
| 27.2535  | 27.35783 | 27.29789 | Q7TQE2;Q62523;A0A0N4SVD2;A0A0N4SVD3     | Q7TQE2;Q62523                | Zyx protein; Zyxin                                               | Zyx             |
| 26.33415 | 26.39428 | 26.10149 | Q7TT37                                  | Q7TT37                       | Elongator complex protein 1                                      | Elp1            |
| 27.11148 | 27.04009 | 27.52402 | Q80SW1;F7ATQ6;D3Z2Q0                    | Q80SW1                       | S-adenosylhomocysteine hydrolase-like protein                    | Ahcy1           |
| 27.50142 | 27.39917 | 27.43141 | Q80W54;I7HIP5                           | Q80W54                       | CAAX prenyl protease 1 homolog                                   | Zmpste24        |
| 28.22159 | 27.99766 | 28.09648 | Q80ZP8;Q3TMX5;Q9CXI5;F6USD5;F6T4        | Q80ZP8;Q3TMX5;Q9CXI5         | Armet protein; Arginine-rich, mutated in ear                     | Manf            |
| 27.46295 | 27.48616 | 27.45513 | Q8BFY9;Q3TKD0;I3QMX2                    | Q8BFY9;Q3TKD0                | Transportin-1; Transportin-1 (Fragment)                          | Tnp1            |
| 28.45513 | 28.26249 | 28.61456 | Q8BGJ5;Q92217;Q8CB58;P17225;E9QM        | Q8BGJ5;Q92217;Q8CB58;P17225  | MCG13402, isoform CRA_a; MCG13402, isoform CRA_b                 | Ptbp1           |
| 29.71129 | 29.61807 | 29.63893 | Q8BP67;F6RSK3                           | Q8BP67                       | 60S ribosomal protein L24                                        | Rpl24           |
| 27.13124 | 26.75175 | 26.80193 | Q8BU33;A0A1W2P8E1;A0A1W2P727;A0A1W2P728 | Q8BU33;A0A1W2P8E1;A0A1W2P727 | Acetolactate synthase-like protein                               | Ilvb1           |
| 28.6764  | 28.88577 | 29.0531  | Q8CS22;A0A11L5SA0                       | Q8CS22                       | Endonuclease domain-containing 1 protein                         | Endod1          |
| 25.89735 | 25.69179 | 26.61807 | Q8C8U0;F7CUU8;A0A0N4SUI5;G3X957         | Q8C8U0                       | Liprin-beta-1                                                    | Ppfpb1          |
| 28.32817 | 28.32817 | 28.4512  | Q8CDN6                                  | Q8CDN6                       | Thioredoxin-like protein 1                                       | Txn1            |
| 26.64581 | 26.36953 | 26.1332  | Q8K297                                  | Q8K297                       | Procollagen galactosyltransferase 1                              | Cogalt1         |
| 26.64581 | 26.75175 | 26.35616 | Q8K411                                  | Q8K411                       | Presequence protease, mitochondrial                              | Pitrm1          |
| 26.60399 | 26.27498 | 26.16806 | Q8VDW0;D6RHT5                           | Q8VDW0;D6RHT5                | ATP-dependent RNA helicase DDX39A; DEAD domain protein           | Ddx39a; Ddx39   |
| 27.67303 | 28.08132 | 27.97596 | Q91XV3                                  | Q91XV3                       | Brain acid soluble protein 1                                     | Basp1           |
| 28.30226 | 28.16997 | 28.23078 | Q99N15;A2AFQ2;O08756                    | Q99N15;A2AFQ2;O08756         | 17beta-hydroxysteroid dehydrogenase type 17                      | Hsd17b10        |
| 27.19835 | 26.89735 | 27.22619 | Q9CXF4                                  | Q9CXF4                       | TBC1 domain family member 15                                     | Tbc1d15         |
| 27.28912 | 27.33245 | 27.13124 | Q9D1C8                                  | Q9D1C8                       | Vacuolar protein sorting-associated protein 37                   | Vps37           |
| 27.13124 | 27.18896 | 27.2535  | Q9DBH5                                  | Q9DBH5                       | Vesicular integral-membrane protein VIP36                        | Lman2           |
| 28.11148 | 28.00303 | 28.0296  | Q9JMH6;A0A1W2P6U1;Q9DB4;A0A0N4SUI6      | Q9JMH6                       | Thioredoxin reductase 1, cytoplasmic                             | Txnrd1          |
| 29.16997 | 29.26249 | 29.14589 | Q9QUM9;E0CXB1;E0CYT2                    | Q9QUM9;E0CXB1                | Proteasome subunit alpha type-6; Proteasome subunit alpha type-6 | Psmag6          |
| 28.95394 | 28.95394 | 29.14346 | Q9QYJ0                                  | Q9QYJ0                       | Dnal homolog subfamily A member 2                                | Dnaia2          |
| 29.94    | 30.04791 | 29.95394 | Q9ROP5                                  | Q9ROP5                       | Dextrin                                                          | Dstn            |
| 28.38278 | 28.31527 | 28.46295 | Q9WV54;D3Z505                           | Q9WV54                       | Acid ceramidase                                                  | Asah1           |
| 29.66119 | 29.43539 | 29.53148 | Q9WV55                                  | Q9WV55                       | Vesicle-associated membrane protein-associated 1                 | Vapa            |
| 27.07112 | 27.16997 | 27.23535 | Q9Z1Z2                                  | Q9Z1Z2                       | Serine-threonine kinase receptor-associated protein              | Strap           |
| 28.72598 | 28.70306 | 28.76446 | A0A0R4I2W8;O88456;A0A0R4J1C2;Q9D        | A0A0R4I2W8;O88456;A0A0R4I2W8 | Calpain small subunit 1                                          | Capns1          |
| 26.71293 | 26.80193 | 26.80193 | A0A1B0GR11;Q93092                       | A0A1B0GR11;Q93092            | Transaldolase                                                    | Taldo1          |

|          |          |          |                                   |                              |                                                |               |
|----------|----------|----------|-----------------------------------|------------------------------|------------------------------------------------|---------------|
| 28.62157 | 28.78955 | 28.77706 | B1AWEO;Q6PFA2;B1AWE1;B1AWD8;B1    | B1AWEO;Q6PFA2;B1AWE1         | Clathrin light chain                           | Cltb          |
| 22.16423 | 24.44253 | 25.391   | D3Z030;Q6EDY6;F7AI27;E9Q4H6       | D3Z030;Q6EDY6;F7AI27         | F-actin-uncapping protein LRRC16A              | Carmil1       |
| 27.35783 | 27.44727 | 27.43936 | E9PY18;Q9JMA1                     | E9PY18;Q9JMA1                | Ubiquitin carboxyl-terminal hydrolase 14       | Usp14         |
| 27.05051 | 26.89735 | 27.0296  | E9Q197;Q9CPV4;F6ZTG3;E9Q055;E9Q2  | E9Q197;Q9CPV4;F6ZTG3         | Glyoxalase domain-containing protein 4         | Glx4          |
| 26.31872 | 26.21882 | 26.4008  | E9Q2X6;Q8CG47;A0A0A6YXY3;Q3U763   | E9Q2X6;Q8CG47                | Structural maintenance of chromosomes pro      | Smc4          |
| 25.33756 | 25.56384 | 25.71555 | E9Q638;A0A140LHU0;Q61072;A0A1B0   | E9Q638;A0A140LHU0;Q61072     | Disintegrin and metalloproteinase domain-      | Adam9         |
| 28.04531 | 27.72598 | 27.46295 | E9QKZ2;Q91YE6;E0CX82;F6TLX3;E0CY4 | E9QKZ2;Q91YE6;E0CX82         | Importin-9                                     | Ipo9          |
| 29.02168 | 29.12139 | 29.04009 | E9QN08;Q80T06;P57776;Q91VK2;A0A0  | E9QN08;Q80T06;P57776;Q91VK2  | Elongation factor 1-delta (Fragment);Elonga    | Eef1d         |
| 25.7415  | 25.70767 | 26.15653 | F8VPK5;A0A1Y7VMNO;P70336;P70335;  | F8VPK5;A0A1Y7VMNO;P70336     | Rho-associated protein kinase;Rho-associat     | Rock2         |
| 26.81421 | 25.14102 | 26.90885 | F8WJEO;Q60710;F6TVP2;E9Q0K6;E9PYG | F8WJEO;Q60710;F6TVP2;E9Q0K6  | Deoxynucleoside triphosphate triphospho        | Samhd1        |
| 28.81115 | 28.86526 | 28.97049 | G3UXZ5;P97371;G3UXY0;G3X9K9;G3U   | G3UXZ5;P97371;G3UXY0;G3X9K9  | Proteasome activator complex subunit 1 (Fr     | Psme1         |
| 29.32389 | 29.66628 | 29.33458 | G3X8R0;Q60870                     | G3X8R0;Q60870                | Receptor expression-enhancing protein;Rece     | Reep5         |
| 28.29351 | 28.3452  | 28.47846 | G3X9L6;Q9DCX2;B1ASE2              | G3X9L6;Q9DCX2;B1ASE2         | ATP synthase subunit d, mitochondrial          | Gm10250;Atp5f |
| 26.56384 | 26.49686 | 26.34604 | G5E924;Q8R081;G3UY38;G3UY56       | G5E924;Q8R081;G3UY38         | Heterogeneous nuclear ribonucleoprotein L      | Hnrnpl        |
| 26.54628 | 26.63201 | 26.46295 | K3W4T3;Q9Z1G4;A2A599              | K3W4T3;Q9Z1G4                | V-type proton ATPase subunit a;V-type prot     | Atp6v0a1      |
| 29.15316 | 29.12879 | 29.02168 | O35566;A0A1B0GSK8;A0A1B0GRG3;AO   | O35566;A0A1B0GSK8            | CD151 antigen;Tetraspanin (Fragment)           | Cd151         |
| 30.06085 | 29.99496 | 30.03486 | O55142                            | O55142                       | 60S ribosomal protein L35a                     | Rpl35a        |
| 29.29351 | 29.2803  | 29.25575 | O70326;O88273                     | O70326                       | Gremlin-1                                      | Grem1         |
| 26.40406 | 25.59263 | 25.84086 | P07141;D3Z090;D3YTW1;F6RNW8       | P07141;D3Z090                | Macrophage colony-stimulating factor 1;Ma      | Csf1          |
| 28.43936 | 28.47073 | 28.44332 | P09528                            | P09528                       | Ferritin heavy chain                           | Fth1          |
| 28.58262 | 28.63893 | 28.52028 | P10833;A0A1B0GRG1                 | P10833                       | Ras-related protein R-Ras                      | Rras          |
| 29.01638 | 28.97323 | 28.99496 | P14152;B1ATQ3                     | P14152                       | Malate dehydrogenase, cytoplasmic              | Mdh1          |
| NaN      | 24.44253 | 23.05258 | P14733                            | P14733                       | Lamin-B1                                       | Lmnb1         |
| 26.81421 | 26.85043 | 26.85043 | P17439;A0A0G2JDK2                 | P17439;A0A0G2JDK2            | Glucosylceramidase                             | Gba           |
| 25.57542 | 25.58405 | 26.46451 | P18872;D3Z2M7;F7BLT7              | P18872;D3Z2M7                | Guanine nucleotide-binding protein G(o) su     | Gnao1         |
| 21.29894 | 21.94949 | 21.27071 | P24472;A0A1L1SS61                 | P24472                       | Glutathione S-transferase A4                   | Gsta4         |
| 29.37244 | 29.18187 | 29.35153 | P26516                            | P26516                       | 26S proteasome non-ATPase regulatory sub       | Psm7          |
| 27.87994 | 28.05569 | 28.12633 | P28474;A0A0G2JGS3                 | P28474                       | Alcohol dehydrogenase class-3                  | Adh5          |
| 27.11148 | 27.28912 | 27.27142 | P35486                            | P35486                       | Pyruvate dehydrogenase E1 component sub        | Pdh1          |
| 27.12139 | 27.18896 | 27.04009 | P40336;A0A1W2P7Z9;A0A1W2P7R7      | P40336                       | Vacuolar protein sorting-associated protein    | Vps26a        |
| 26.64581 | 26.52701 | 26.33586 | P47857                            | P47857                       | ATP-dependent 6-phosphofructokinase, mu        | Pfkm          |
| NaN      | NaN      | NaN      | P47880                            | P47880                       | Insulin-like growth factor-binding protein 6   | Igfbp6        |
| 27.31527 | 27.34942 | 27.3662  | P50396;B7FAU8;D6RI86              | P50396                       | Rab GDP dissociation inhibitor alpha           | Gdi1          |
| 30.47267 | 30.67135 | 30.82335 | P61027;D3YUS4                     | P61027                       | Ras-related protein Rab-10                     | Rab10         |
| 27.24445 | 27.49381 | 27.43936 | P61202;A2AQE4                     | P61202;A2AQE4                | COP9 signalosome complex subunit 2             | Cops2         |
| 30.61982 | 30.60222 | 30.5389  | P61358;A2A4Q0                     | P61358;A2A4Q0                | 60S ribosomal protein L27;60S ribosomal pr     | Rpl27         |
| 29.8814  | 29.81115 | 29.80193 | P62852;A0A1L1SQA8                 | P62852;A0A1L1SQA8            | 40S ribosomal protein S25                      | Rps25         |
| 30.07368 | 29.95394 | 29.99496 | P62880;E9QKRO;D3YZX3;D3Z1M1;D3Z1  | P62880;E9QKRO;D3YZX3;D3Z1M1  | Guanine nucleotide-binding protein G(I)/G(S    | Gnb2          |
| 30.33031 | 30.11148 | 30.20769 | P63276                            | P63276                       | 40S ribosomal protein S17                      | Rps17         |
| 27.11148 | 27.06085 | 27.61105 | Q02248;E9Q6A9;F7BAC9;F7CRC6;F6QZ  | Q02248;E9Q6A9                | Catenin beta-1                                 | Ctnnb1        |
| 28.56819 | 28.77077 | 28.58262 | Q11011;F6QYF8;E9Q039;E9Q6F4;F6V7K | Q11011;F6QYF8;E9Q039         | Puromycin-sensitive aminopeptidase;Amino       | Npepps        |
| 30.52028 | 30.52962 | 30.62854 | Q3TF41;Q8BSH9;E9PW66;P28656       | Q3TF41;Q8BSH9;E9PW66         | Nucleosome assembly protein 1-like 1           | Nap11         |
| 27.91456 | 28.11148 | 28.08639 | Q3TVK3;Q9Z2W0;Q8BPW9;A0A087WS     | Q3TVK3;Q9Z2W0;Q8BPW9         | Aspartyl aminopeptidase                        | Dnep1         |
| 28.40324 | 28.62854 | 28.51277 | Q3TXV4;Q921E2;D6RFT6              | Q3TXV4;Q921E2                | Rab22B;Ras-related protein Rab-31              | Rab31         |
| 26.80193 | 26.30138 | 26.10149 | Q3UPN1;P29533;A0A0G2JFP9          | Q3UPN1;P29533;A0A0G2JFP9     | Vascular cell adhesion protein 1               | Vcam1         |
| 23.74919 | 23.50446 | 24.99766 | Q5FWI3                            | Q5FWI3                       | Cell surface hyaluronidase                     | Tmem2         |
| 29.7162  | 29.7162  | 29.85935 | Q61171;D3Z4A4                     | Q61171;D3Z4A4                | Peroxisedoxin-2;Peroxisedoxin-2 (Fragment)     | Prdx2         |
| 26.09144 | 26.07928 | 26.26428 | Q61235;B7ZNU9                     | Q61235;B7ZNU9                | Beta-2-syntrophin                              | Sntb2         |
| 24.417   | 25.24627 | 25.239   | Q62165                            | Q62165                       | Dystroglycan                                   | Dag1          |
| 26.58978 | 26.67303 | 26.2732  | Q62433;E9Q514;E9Q5I8;E9Q3F9;E9PVF | Q62433                       | Protein NDRG1                                  | Ndrg1         |
| 24.98468 | 25.20955 | 25.49534 | Q6GQT9                            | Q6GQT9                       | Nodal modulator 1                              | Nomo1         |
| 28.29351 | 28.06599 | 28.13124 | Q6P1F6;Q9CWU3;Q925E7;F6RV17;Q6Z   | Q6P1F6;Q9CWU3                | Serine/threonine-protein phosphatase 2A 5      | Ppp2r2a;Ppp2  |
| 25.02327 | 25.59833 | 25.77455 | Q8BK67;A2AWQ2                     | Q8BK67                       | Protein RCC2                                   | Rcc2          |
| 31.06085 | 31.00169 | 31.06085 | Q8C253;P16110                     | Q8C253;P16110                | Galectin;Galectin-3                            | Lgals3        |
| 28.27586 | 28.35783 | 28.23078 | Q8C2Q8;Q91VR2;A2AKU9;A2AKV1;A2A   | Q8C2Q8;Q91VR2;A2AKU9         | ATP synthase subunit gamma;ATP synthase        | Atp5c1        |
| 26.40892 | 26.65949 | 26.71293 | Q8K4Q8                            | Q8K4Q8                       | Collectin-12                                   | Clc12         |
| 26.61807 | 26.42662 | 26.80193 | Q91VD9;A0A087WQ77;A0A087WR47;A    | Q91VD9                       | NADH-ubiquinone oxidoreductase 75 kDa su       | Ndufs1        |
| 26.27675 | 26.07316 | 26.16423 | Q91VR5;A0A1Y7VM48                 | Q91VR5                       | ATP-dependent RNA helicase DDX1                | Ddx1          |
| 25.98685 | 26.14492 | 25.90426 | Q921M3                            | Q921M3                       | Splicing factor 3B subunit 3                   | Sf3b3         |
| 26.60399 | 26.67303 | 26.85043 | Q99KK7                            | Q99KK7                       | Dipeptidyl peptidase 3                         | Dpp3          |
| 28.55728 | 28.48232 | 28.47073 | Q99L45;E0CXJ3                     | Q99L45                       | Eukaryotic translation initiation factor 2 sub | Eif2s2        |
| 27.97049 | 27.63893 | 27.53148 | Q9QC60;Q8CBG6;D3Z4X1;F6X8L5       | Q9QC60;Q8CBG6;D3Z4X1         | 6-phosphogluconolactonase                      | Pglf5         |
| 26.22435 | 26.16231 | 26.16423 | Q9D662;A2ANA0;A2AN97;A2AN98;A2A   | Q9D662                       | Protein transport protein Sec23B               | Sec23b        |
| 26.3256  | 25.92931 | 26.14686 | Q9D6X6;A0A140LJH8;A0A140LHF1;A0A  | Q9D6X6;A0A140LJH8            | Serine protease 23;Serine protease 23 (Frag    | Prss23        |
| 25.05569 | 28.09648 | 27.85638 | Q9DCH4                            | Q9DCH4                       | Eukaryotic translation initiation factor 3 sub | Eif3f         |
| 26.52103 | 26.68646 | 26.69975 | Q9QWR8                            | Q9QWR8                       | Alpha-N-acetylgalactosaminidase                | Naga          |
| 28.30661 | 28.05569 | 27.93157 | Q9ROY5;Z4YN97;A0A0A6YXW8          | Q9ROY5                       | Adenylylase kinase isoenzyme 1                 | Ak1           |
| 25.33074 | NaN      | 24.33074 | Q9WUU7                            | Q9WUU7                       | Cathepsin Y                                    | Ctsy          |
| 26.038   | 25.97378 | 26.1035  | Q9Z204;A0A1D5RLK6;A0A1D5RMF0;AO   | Q9Z204                       | Heterogeneous nuclear ribonucleoproteins       | Hnrnpsc       |
| 25.58405 | 25.30313 | 24.82396 | Q9Z218;A0A0N4SWD1                 | Q9Z218                       | Succinate--CoA ligase [GDP-forming] subunit    | Suclg2        |
| 25.30661 | 25.60399 | 25.83123 | Z4YL78;A0A0R4J0K2;K3W4R5;A2AGT5   | Z4YL78;A0A0R4J0K2;K3W4R5     | Cytoskeleton-associated protein 5              | Ckap5         |
| 26.68646 | 26.63201 | 26.72598 | A0A0A6YX18;Q8BEV3;A0A0A6YWP6;AO   | A0A0A6YX18;Q8BEV3;A0A0A6YWP6 | V-type proton ATPase subunit H                 | Atp6v1h       |
| 33.9763  | 33.88831 | 34.01837 | A0A0G2JGD2;P07091                 | A0A0G2JGD2;P07091            | Protein S100-A4 (Fragment);Protein S100-A      | S100a4        |
| 27.78955 | 27.79576 | 27.77706 | A0A0R4J083;P51174                 | A0A0R4J083;P51174            | Long-chain-specific acyl-CoA dehydrogenase     | Acadl         |
| 32.5038  | 32.35941 | 32.37244 | A0A1W2P6F6;A0A1W2P7Q9;Q60605;Q    | A0A1W2P6F6;A0A1W2P7Q9        | Myosin light polypeptide 6                     | My6;My        |
| 27.0296  | 27.08132 | 27.12139 | A2A6U3;Q80UG5;A2A6U5;A8Y5D3       | A2A6U3;Q80UG5;A2A6U5         | Septin-9;Septin-9 (Fragment)                   | Sept9         |
| 24.417   | 24.48001 | 24.417   | A2AVJ7;Q99PL5                     | A2AVJ7;Q99PL5                | Ribosome-binding protein 1                     | Rrbp1         |
| 24.64306 | 25.94503 | 25.73892 | A2AWA9;A2AWA7;A2AWB0;A0A0A6Y      | A2AWA9                       | Rab GTPase-activating protein 1                | Rabgap1       |
| 24.49838 | 23.63201 | 23.77957 | A6PW84;A2A7Q5;Q3V1T4;F2Z499       | A6PW84;A2A7Q5;Q3V1T4         | Prolyl 3-hydroxylase 1                         | P3h1          |
| 25.9428  | 26.15653 | 25.35448 | B1AU25;Q9Z0X1                     | B1AU25;Q9Z0X1                | Apoptosis-inducing factor 1, mitochondrial     | Aifm1         |
| 25.81909 | 25.83605 | 25.99335 | B2RRF0;A0A1W2P7Y1;P35822;A0A1W2   | B2RRF0;A0A1W2P7Y1;P35822     | Ptprk protein;Receptor-type tyrosine-protein   | Ptprk         |
| 26.11942 | 26.45513 | 26.2803  | D3Z3B8;H7BWW4;E9Q9H0;Q811D0;F6U   | D3Z3B8;H7BWW4;E9Q9H0         | Disks large homolog 1                          | Dlg1          |
| 27.97596 | 28.09144 | 28.01372 | D3Z3G6;Q63844;A0A0U1RPX4;A0A0U1   | D3Z3G6;Q63844;A0A0U1RPX4     | Mitogen-activated protein kinase;Mitogen-      | Mapk3         |
| 25.90196 | 25.96279 | 26.00196 | D3Z7P3;D3Z7P4;F7B3Z7;F6U529;F6RDN | D3Z7P3;D3Z7P4                | Glutaminase kidney isoform, mitochondrial      | Gls           |
| 25.9428  | 26.09346 | 27.33245 | E9Q7U2;Q8CGU1                     | E9Q7U2;Q8CGU1                | Calcium-binding and coiled-coil domain-con     | Calcoo1       |
| 25.47073 | 26.53297 | 26.72598 | F8VQ29;Q3UQP1;A0A0A6YXJ2          | F8VQ29;Q3UQP1                | IQ motif-containing GTPase-activating prote    | Iggap3        |
| 26.63201 | 26.73892 | 26.67303 | F8WGG3;Q9JK81;F7A3N3              | F8WGG3;Q9JK81;F7A3N3         | UPF0160 protein MYG1, mitochondrial (Frag      | Myg1          |
| 20.47754 | 20.68859 | NaN      | F8WH23;E9Q5D9;Q61581              | F8WH23;E9Q5D9;Q61581         | Insulin-like growth factor-binding protein 7   | Igfbp7        |

|          |          |          |                                    |                        |                                                |                |
|----------|----------|----------|------------------------------------|------------------------|------------------------------------------------|----------------|
| 27.53148 | 27.58978 | 27.63893 | J7NUP1;Q60766                      | J7NUP1;Q60766          | Immunity-related GTPase family M protein       | Irgm1          |
| 28.86821 | 28.66628 | 28.55362 | O09061                             | O09061                 | Proteasome subunit beta type-1                 | Psmb1          |
| 27.95394 | 27.28912 | 27.87408 | O35239;A0A1L1STP0                  | O35239                 | Tyrosine-protein phosphatase non-receptor      | Ptpn9          |
| 27.63201 | 27.26249 | 27.2535  | O35295                             | O35295                 | Transcriptional activator protein Pur-beta     | Purb           |
| 25.38772 | 25.57831 | 25.67034 | O35382;Q8C391;Q9CXE1               | O35382;Q8C391          | Exocyst complex component 4                    | Exoc4          |
| 29.91171 | 29.86821 | 29.80809 | O35682;A0A0N4SW94                  | O35682                 | Myeloid-associated differentiation marker      | Myadm          |
| NaN      | NaN      | NaN      | O54724                             | O54724                 | Caveolae-associated protein 1                  | Cavin1         |
| 24.23169 | 23.51653 | 25.32045 | O54782;F6TMZ3;F6Z025               | O54782                 | Epididymis-specific alpha-mannosidase          | Man2b2         |
| 28.27142 | 28.88285 | 28.56819 | O55234                             | O55234                 | Proteasome subunit beta type-5                 | Psmb5          |
| 28.7357  | 28.73247 | 28.58978 | O70251;A0A087WS46;G3UX43;G3UZ47    | O70251;A0A087WS46      | Elongation factor 1-beta;Eukaryotic translati  | Eef1b;Eef1b2   |
| 26.73892 | 26.68646 | 26.53594 | O70400;S4R1V0                      | O70400;S4R1V0          | PDZ and LIM domain protein 1;PDZ and LIM       | Pdlim1         |
| 25.44884 | 25.43301 | 25.68913 | O88986;E9PWY6                      | O88986;E9PWY6          | 2-amino-3-ketobutyrate coenzyme A ligase,      | Gcat           |
| 27.33245 | 27.33245 | 27.2803  | O89079;D3Z315;F6YFR7;E9Q6I5;F6XIG2 | O89079;D3Z315;F6YFR7   | Coatomer subunit epsilon;Coatomer subunit      | Cope;Co        |
| 28.14589 | 28.27142 | 28.24898 | P00493                             | P00493                 | Hypoxanthine-guanine phosphoribosyltransf      | Hprt1          |
| 23.09828 | NaN      | 24.50446 | P06869                             | P06869                 | Urokinase-type plasminogen activator           | Plau           |
| 28.65949 | 28.71293 | 28.54995 | P08122;B1AVK5                      | P08122                 | Collagen alpha-2(IV) chain                     | Col4a2         |
| 30.94    | 30.5389  | 30.39305 | P08207                             | P08207                 | Protein S100-A10                               | S100a10        |
| 31.32496 | 31.37762 | 31.29242 | P0DP28;P0DP27;P0DP26;Q3UKW2;Q9D    | P0DP28;P0DP27;P0DP26;Q | Calmodulin-3;Calmodulin-2;Calmodulin-1         | Calm3;Calm2;Ca |
| 25.62087 | 26.01903 | 25.90196 | P11928;Q8K469;Q05BJ7;Q8V195;Q9245  | P11928;Q8K469          | 2-5-oligoadenylate synthase 1A;2-5 oligoad     | Oas1a;Oas1g    |
| 28.33671 | 28.3869  | 28.31959 | P12815                             | P12815                 | Programmed cell death protein 6                | Pdcd6          |
| 25.48922 | 24.54628 | 25.2571  | P27601;Q9D034                      | P27601                 | Guanine nucleotide-binding protein subunit     | Gna13          |
| 27.42342 | 27.56819 | 27.60399 | P31230;Q3UZG4;A0A0G2JDW6;A0A0G2    | P31230;Q3UZG4;A0A0G2J  | Aminoacyl tRNA synthase complex-interacti      | Aimp1          |
| 26.78955 | 27.13124 | 27.05051 | P31938                             | P31938                 | Dual specificity mitogen-activated protein ki  | Map2k1         |
| 30.46295 | 30.52028 | 30.52962 | P35979;F8VQK7                      | P35979                 | 60S ribosomal protein L12                      | Rpl12          |
| 27.3662  | 27.51653 | 27.2803  | P43276                             | P43276                 | Histone H1.5                                   | Hist1h1b       |
| 28.37865 | 28.62506 | 28.55728 | P45591;A0A1Y7VJ71                  | P45591                 | Cofilin-2                                      | Cfl2           |
| 27.18896 | 27.16997 | 27.30661 | P46664                             | P46664                 | Adenylosuccinate synthetase isozyme 2          | Adss           |
| 26.2803  | 26.44727 | 26.21882 | P47791                             | P47791                 | Glutathione reductase, mitochondrial           | Gsr            |
| 27.73892 | 29.80655 | 29.62157 | P51881                             | P51881                 | ADP/ATP translocase 2                          | Slc25a5        |
| 27.71293 | 27.73247 | 27.55362 | P54116                             | P54116                 | Erythrocyte band 7 integral membrane prot      | Stom           |
| 28.42742 | 28.34942 | 28.54995 | P55258;Q9CXS2;Q3TYH2;A0A286YDR2    | P55258                 | Ras-related protein Rab-8A                     | Rab8a          |
| 29.74535 | 30.02168 | 29.79421 | P59999;Q3TX55;E9PWA7               | P59999                 | Actin-related protein 2/3 complex subunit 4    | Arpc4          |
| 28.01903 | 27.94838 | 27.88577 | P60229                             | P60229                 | Eukaryotic translation initiation factor 3 sub | Eif3e          |
| 29.15557 | 29.10649 | 29.02433 | P60335                             | P60335                 | Poly(rC)-binding protein 1                     | Pcbp1          |
| 28.18896 | 28.22159 | 28.18423 | P61089;A0A1W2P7Z3                  | P61089                 | Ubiquitin-conjugating enzyme E2 N              | Ube2n          |
| 29.96774 | 29.98142 | 29.94    | P62264;D3YVF4;D3Z711               | P62264;D3YVF4;D3Z711   | 40S ribosomal protein S14;40S ribosomal pr     | Rps14          |
| 29.96774 | 29.86378 | 29.98142 | P62830;A2A6F8                      | P62830                 | 60S ribosomal protein L23                      | Rpl23          |
| 28.24898 | 28.31527 | 28.43141 | P62960;A2BGG7;A0A0A0MQD2;B2RUF     | P62960;A2BGG7          | Nuclease-sensitive element-binding protein     | Ybx1           |
| 26.86231 | 27.05051 | 27.04009 | P70452;D6RJ29                      | P70452                 | Syntaxin-4                                     | Stx4           |
| 26.08335 | 26.20769 | 26.01903 | P70699;F6R5R5;A2AFL3;F6VEG4;A2AFL  | P70699                 | Lysosomal alpha-glucosidase                    | Gaa            |
| 28.93438 | 28.9428  | 28.89735 | P99029;G3UZJ4;H3BIQ7               | P99029;G3UZJ4;H3BIQ7   | Peroxioredoxin-5, mitochondrial                | Prdx5;Prd      |
| 26.53445 | 26.47383 | 26.31354 | Q05D44                             | Q05D44                 | Eukaryotic translation initiation factor 5B    | Eif5b          |
| NaN      | 24.62087 | 24.86703 | Q07113                             | Q07113                 | Cation-independent mannose-6-phosphate         | Igf2r          |
| 27.54628 | 27.34942 | 27.41538 | Q08093;D3Z7R6                      | Q08093;D3Z7R6          | Calponin-2;Calponin                            | Cnn2           |
| 23.58692 | 24.86703 | 23.89504 | Q3TBA3;P21958;F6QHF1               | Q3TBA3;P21958          | Antigen peptide transporter 1                  | Tap1           |
| 29.48039 | 29.56275 | 29.35783 | Q3TLP8;P63001;P60764;A2AC13;Q0514  | Q3TLP8;P63001;P60764   | RAS-related G3 botulinum substrate 1, isofo    | Rac1           |
| 27.10149 | 26.96499 | 27.07112 | Q3TU36;E9Q912;E9Q6Q4;A0A0G2JGC8    | Q3TU36;E9Q912;E9Q6Q4   | RAP1, GTP-GDP dissociation stimulator 1        | Rap1gds1       |
| 26.99766 | 26.85043 | 26.89735 | Q3U367;Q9JLJ2                      | Q3U367;Q9JLJ2          | 4-trimethylaminobutyraldehyde dehydrogen       | Aldh9a1        |
| 26.2021  | 26.01052 | 25.91342 | Q3U4F0;Q91V61                      | Q3U4F0;Q91V61          | Sideroflexin-3                                 | Sfxn3          |
| 27.52402 | 27.4073  | 27.41538 | Q3UDE2;F2Z423                      | Q3UDE2                 | Tubulin--tyrosine ligase-like protein 12       | Ttl12          |
| 27.55362 | 27.51653 | 27.43141 | Q3UDS7;A0A1L1SSF2;Q8VDL4           | Q3UDS7;A0A1L1SSF2;Q8V  | ADP-dependent glucokinase                      | Adpgk          |
| 28.56092 | 28.50142 | 28.39509 | Q5RKN9;P47753;A0A0G2JE27           | Q5RKN9;P47753          | Capping protein (Actin filament) muscle Z-lir  | Capza1         |
| 27.0296  | 27.14102 | 27.07112 | Q61166                             | Q61166                 | Microtubule-associated protein RP/EB famil     | Mapre1         |
| 27.34942 | 27.56092 | 27.56819 | Q61187;A0A1B0GS09;A0A1B0GS10;A0A   | Q61187;A0A1B0GS09      | Tumor susceptibility gene 101 protein;Tumo     | Tsg101         |
| 23.79947 | NaN      | NaN      | Q61576;A2A4H9;F6W360               | Q61576;A2A4H9          | Peptidyl-prolyl cis-trans isomerase FKBP10;P   | Fkbp10         |
| 24.64306 | 24.45513 | 25.05672 | Q61881;D3Z6N3;D3Z335;D3Z0J6;D3Z2   | Q61881;D3Z6N3          | DNA replication licensing factor MCM7          | Mcm7           |
| 27.74535 | 27.75812 | 27.82639 | Q62371;A0A0A6GY2                   | Q62371                 | Discoidin domain-containing receptor 2         | Ddr2           |
| 25.68646 | 25.92025 | 25.96279 | Q6NZD2;Q9WV80;D3YWH1               | Q6NZD2;Q9WV80          | Sorting nexin-1                                | Snx1           |
| 27.84446 | 27.87994 | 27.75812 | Q6P069                             | Q6P069                 | Sorcin                                         | Sri            |
| 26.20769 | 26.14686 | 26.21882 | Q6VH22;A0A0J9YU41;A0A0J9YV04;A0A   | Q6VH22;A0A0J9YU41      | Intraflagellar transport protein 172 homolog   | Ift172         |
| 27.19835 | 27.2803  | 26.92025 | Q80X95;Q6NTA4;G3UYV1               | Q80X95;Q6NTA4          | Ras-related GTP-binding protein A;Ras-relate   | Rraga;Rragb    |
| 27.87408 | 27.90311 | 28.12139 | Q8BFW7                             | Q8BFW7                 | Lipoma-preferred partner homolog               | Lpp            |
| 24.2535  | 24.11744 | 23.60964 | Q8BGZ6;P51569;A2BDV6               | Q8BGZ6;P51569          | Alpha-galactosidase A                          | Gla            |
| 29.59513 | 29.87115 | 29.42142 | Q8BMD8                             | Q8BMD8                 | Calcium-binding mitochondrial carrier prote    | Slc25a24       |
| 27.79576 | 27.84446 | 27.97049 | Q8BMS1                             | Q8BMS1                 | Trifunctional enzyme subunit alpha, mitoch     | Hadha          |
| 22.83846 | 24.37782 | 22.31838 | Q8BND5                             | Q8BND5                 | Sulfhydryl oxidase 1                           | Qsox1          |
| NaN      | NaN      | 23.03758 | Q8BNY0;A0A0R4J026;P47931;A0A286Y   | Q8BNY0;A0A0R4J026;P47  | Follistatin                                    | Fst            |
| 27.20769 | 27.22619 | 27.42342 | Q8BP92                             | Q8BP92                 | Reticulocalbin-2                               | Rcn2           |
| 27.60399 | 27.61807 | 27.42342 | Q8BWY3                             | Q8BWY3                 | Eukaryotic peptide chain release factor sub    | Etf1           |
| 27.34942 | 27.30661 | 26.35448 | Q8VBZ3                             | Q8VBZ3                 | Cleft lip and palate transmembrane protein     | Ciptm1         |
| 27.30661 | 26.63201 | 27.4073  | Q921H8;H3BKLS;H3BJZ9;Q8VCHO;H3BK   | Q921H8;H3BKLS;H3BJZ9;Q | 3-ketoacyl-CoA thiolase A, peroxisomal         | Acaa1a         |
| 23.11902 | 23.49228 | 23.10629 | Q99JB8;B1AW91;A6PWR1;B1AW94;B1A    | Q99JB8;B1AW91;A6PWR1   | Protein kinase C and casein kinase II substr   | Pascin3        |
| 26.71293 | 26.69975 | 26.76446 | Q99KC8                             | Q99KC8                 | von Willebrand factor A domain-containing      | Vwa5a          |
| 27.27142 | 27.16039 | 27.391   | Q99LP6                             | Q99LP6                 | GrpE protein homolog 1, mitochondrial          | Grpel1         |
| 27.71947 | 27.63201 | 27.57542 | Q99LS3;A0A0J9YVH9;D3Z4T3;D3Z666    | Q99LS3;A0A0J9YVH9;D3Z  | Phosphoserine phosphatase;Phosphoserine        | PspH;Ps        |
| 28.56456 | 28.61807 | 28.49762 | Q99LX0;A2A813;A2A815;A2A817;A2A8   | Q99LX0;A2A813;A2A815   | Protein/nucleic acid deglycase DJ-1            | Park7          |
| 25.33415 | 25.56092 | 25.54628 | Q99P88                             | Q99P88                 | Nuclear pore complex protein Nup155            | Nup155         |
| 29.94    | 29.89735 | 29.73409 | Q9CQM8;O09167                      | Q9CQM8;O09167          | 60S ribosomal protein L21                      | Rpl21          |
| 28.39509 | 28.36202 | 28.30661 | Q9CQQ7;A0A0G2JGX3                  | Q9CQQ7                 | ATP synthase F(0) complex subunit B1, mito     | Atp5f1         |
| 26.43778 | 26.41538 | 26.509   | Q9D071;F7C9N6;E9PW47;F6RGG4;F7A    | Q9D071;F7C9N6          | MMS19 nucleotide excision repair protein h     | Mms19          |
| 26.73892 | 26.83846 | 26.89735 | Q9D2G2                             | Q9D2G2                 | Dihydrolypolyslysine-residue succinyltransfe   | Dlst           |
| 22.62087 | 23.77957 | 22.90976 | Q9D8T2                             | Q9D8T2                 | Gasdermin-D                                    | Gsdmcd1        |
| 29.29132 | 29.19131 | 29.26919 | Q9DB20;F6XVM5;F7D3P8               | Q9DB20                 | ATP synthase subunit O, mitochondrial          | Atp5o          |
| 26.63201 | 26.72598 | 26.63201 | Q9DBV4;A2AD97                      | Q9DBV4;A2AD97          | Matrix remodeling-associated protein 8;Mat     | Mxra8          |
| 25.36119 | 25.44253 | 25.86703 | Q9DC23                             | Q9DC23                 | DnaJ homolog subfamily C member 10             | Dnajc10        |
| 26.38278 | 26.56674 | 26.3256  | Q9EQ06;A8Y5N4;Q8VCR2               | Q9EQ06                 | Estradiol 17-beta-dehydrogenase 11             | Hsd17b11       |
| 32.18423 | 31.98142 | 32.07048 | Q9ERK4;E9Q1T9;E9QAX7;F6ZEW4        | Q9ERK4;E9Q1T9;E9QAX7   | Exportin-2;Exportin-2 (Fragment)               | Cse1l          |
| 26.97596 | 27.06085 | 27.04009 | Q9JIW9;F6QC68                      | Q9JIW9;F6QC68          | Ras-related protein Ral-B;Ras-related protei   | Ralb           |

|          |          |          |                                         |                                         |                                                                                                 |                 |
|----------|----------|----------|-----------------------------------------|-----------------------------------------|-------------------------------------------------------------------------------------------------|-----------------|
| 28.20769 | 28.28472 | 28.18423 | Q9JJ00                                  | Q9JJ00                                  | Phospholipid scramblase 1                                                                       | Plscr1          |
| 27.92592 | 27.44727 | 27.43141 | Q9JK48;A0A0G2JEC4;A0A0G2JEF5;A0A0G2JEF6 | Q9JK48;A0A0G2JEC4                       | Endophilin-B1                                                                                   | Sh3glb1         |
| 27.84446 | 27.61105 | 27.61807 | Q9QXT0;A0A1W2P729                       | Q9QXT0;A0A1W2P729                       | Protein canopy homolog 2;Protein canopy homolog 2                                               | Cnpy2           |
| 24.09346 | 23.72858 | 24.26069 | Q9CZQ8;Q8CCK0                           | Q9CZQ8                                  | Core histone macro-H2A.1                                                                        | A0A1W2P729      |
| 28.54628 | 28.5862  | 28.4746  | Q9R1P3                                  | Q9R1P3                                  | Proteasome subunit beta type-2                                                                  | Psmb2           |
| 29.1795  | 29.14346 | 29.16758 | Q9Z0J0                                  | Q9Z0J0                                  | Epididymal secretory protein E1                                                                 | Npc2            |
| 28.58262 | 28.68979 | 28.54259 | Q9Z127                                  | Q9Z127                                  | Large neutral amino acids transporter small subunit 1                                           | Slc7a5          |
| 26.69975 | 26.72853 | 26.86231 | Z4YJW0;Q8C7X2;A0A1Y7VP81                | Z4YJW0;Q8C7X2                           | ER membrane protein complex subunit 1                                                           | Emc1            |
| 32.20186 | 32.0927  | 32.11148 | A0A0N4SV66;Q8R1M2                       | A0A0N4SV66;Q8R1M2                       | Histone H2A;Histone H2AJ                                                                        | H2afj           |
| 25.78207 | 25.86467 | 25.8044  | A0A0R4J107;Q8R146;A0A0A6YXV0            | A0A0R4J107;Q8R146                       | Acylamino-acid-releasing enzyme (Fragment)                                                      | Apeh            |
| 24.84805 | 24.73892 | 24.7024  | A0A140T8V5;P17918                       | A0A140T8V5;P17918                       | Proliferating cell nuclear antigen                                                              | Pcna-ps2;Pcna   |
| 25.84566 | 25.85994 | 26.21327 | A0A286YD12;Q91YP2;A0A286YD77            | A0A286YD12;Q91YP2                       | Neurolysin, mitochondrial                                                                       | Nln             |
| 29.92592 | 29.64581 | 29.79885 | A2A547;P84099                           | A2A547;P84099                           | Ribosomal protein L19;60S ribosomal protein L19                                                 | Rpl19           |
| 27.63893 | 27.56092 | 27.61807 | A2AH25;Q5FWK3                           | A2AH25;Q5FWK3                           | Rho GTPase-activating protein 1                                                                 | Arhgap1         |
| 25.97596 | 26.0041  | 26.01478 | B1ASP2;P52332                           | B1ASP2;P52332                           | Tyrosine-protein kinase;Tyrosine-protein kinase                                                 | Jak1            |
| 25.58118 | 25.86467 | 25.44884 | D3Z3E8;E9PW39;D3YVL0;P23249             | D3Z3E8;E9PW39;D3YVL0;P23249             | Putative helicase MOV-10                                                                        | Mov10           |
| 26.72598 | 26.63201 | 26.60399 | E9Q6R3;O08547;A0A0G2JF08;D6RES2         | E9Q6R3;O08547                           | Vesicle-trafficking protein SEC22b                                                              | Sec22b          |
| 26.37451 | 26.61807 | 26.54185 | G3UYQ2;A0A1B0GX81;G3UZT6;Q3UF95         | G3UYQ2;A0A1B0GX81;G3UZT6;Q3UF95         | Large proline-rich protein BAG6;Large proline-rich protein BAG6                                 | Bag6            |
| 24.26069 | NaN      | 24.62087 | O08538                                  | O08538                                  | Angiopoietin-1                                                                                  | Angpt1          |
| 24.44884 | NaN      | 25.56964 | O08797                                  | O08797                                  | SP16                                                                                            | Serpinb9        |
| 27.90885 | 27.85638 | 27.79576 | O54962                                  | O54962                                  | Barrier-to-autointegration factor                                                               | Ban1            |
| 28.23991 | 28.26249 | 28.23535 | O55022                                  | O55022                                  | Membrane-associated progesterone receptor component 1                                           | Pgrmc1          |
| 26.42662 | 26.44095 | 26.34435 | O70194                                  | O70194                                  | Eukaryotic translation initiation factor 3 subunit 4                                            | Eif3d           |
| 26.80193 | 26.77706 | 26.80193 | O70252;D3YX62;D3YXN4;D3Z4A2             | O70252;D3YX62                           | Heme oxygenase 2;Heme oxygenase 2 (Fragment)                                                    | Hmox2           |
| 25.97596 | 25.70504 | 25.91342 | O70310                                  | O70310                                  | Glycylpeptide N-tetradecanoyltransferase 1                                                      | Nmt1            |
| 27.4073  | 27.43936 | 27.62506 | P10404;P11370;B2RQY6                    | P10404                                  | MLV-related proviral Env polyprotein                                                            |                 |
| 30.21928 | 30.26472 | 30.30878 | P14115                                  | P14115                                  | 60S ribosomal protein L27a                                                                      | Rpl27a          |
| 27.78332 | 27.80809 | 27.78332 | P21460;A2APX3                           | P21460;A2APX3                           | Cystatin-C;Cystatin (Fragment)                                                                  | Cst3            |
| 28.21697 | 28.30226 | 27.9428  | P24668                                  | P24668                                  | Cation-dependent mannose-6-phosphate receptor                                                   | M6pr            |
| 27.51653 | 28.18896 | 28.16997 | P26645                                  | P26645                                  | Myristoylated alanine-rich C-kinase substrate                                                   | Marcks          |
| 25.79699 | 25.97596 | 25.45513 | P27612;F7D1R5                           | P27612                                  | Phospholipase A-2-activating protein                                                            | Plaa            |
| 26.51803 | 26.69975 | 26.57542 | P28063;G3UZW8                           | P28063;G3UZW8                           | Proteasome subunit beta type-8;Proteasome subunit beta type-8                                   | Psmb8           |
| NaN      | NaN      | 23.91342 | P28653                                  | P28653                                  | Biglycan                                                                                        | Bgn             |
| 29.06599 | 29.27808 | 29.15316 | P35278;Q8C266                           | P35278;Q8C266                           | Ras-related protein Rab-5C                                                                      | Rab5c           |
| 27.37451 | 27.63201 | 26.87408 | P35951;A0A1L1SRE8                       | P35951;A0A1L1SRE8                       | Low-density lipoprotein receptor                                                                | Ldlr            |
| 31.03486 | 31.31419 | 31.14224 | P35980;A0A1B0GSS8;A0A1B0GQU8;A0A1B0GQU9 | P35980;A0A1B0GSS8;A0A1B0GQU8;A0A1B0GQU9 | 60S ribosomal protein L18                                                                       | Rpl18;Rpl18b    |
| 25.75939 | 25.64031 | 25.19084 | P39053;A0A0J9YUE9;A0A0J9YUN4;F6W3       | P39053;A0A0J9YUE9;A0A0J9YUN4;F6W3       | Dynamin-1                                                                                       | Dnm1            |
| 26.34942 | 26.38607 | 26.71293 | P42125                                  | P42125                                  | Enoyl-CoA delta isomerase 1, mitochondrial                                                      | Eci1            |
| 28.62506 | 28.98142 | 28.4512  | P45952;D6RFD7                           | P45952                                  | Medium-chain specific acyl-CoA dehydrogenase                                                    | Acadm           |
| 26.39917 | 26.04009 | 25.85281 | P46460;G3UX86                           | P46460                                  | Vesicle-fusing ATPase                                                                           | Nsf             |
| 27.38278 | 26.97596 | 27.49381 | P49817;H3BKGO;D3Z148                    | P49817;H3BKGO;D3Z148                    | Caveolin-1;Caveolin (Fragment)                                                                  | Cav1            |
| 27.08132 | 27.15074 | 27.19835 | P52293;A2A600;A2A601;A6PW68;F2Z4        | P52293                                  | Importin subunit alpha-1                                                                        | Kpna2           |
| 27.68646 | 27.43936 | 27.34096 | P54227;D3Z1Z8;D3Z5N2                    | P54227;D3Z1Z8;D3Z5N2                    | Stathmin;Stathmin (Fragment)                                                                    | Stmn1           |
| 27.77706 | 27.69312 | 27.66628 | P54728                                  | P54728                                  | UV excision repair protein RAD23 homolog 1                                                      | Rad23b          |
| 25.41653 | 24.67034 | 24.62087 | P54754                                  | P54754                                  | Ephrin type-B receptor 3                                                                        | Ephb3           |
| 26.48616 | 26.40243 | 26.61807 | P55065;A2A5K2;A2A5K3;A2A5K4             | P55065;A2A5K2                           | Phospholipid transfer protein                                                                   | Pltp            |
| 30.27586 | 30.17236 | 30.40324 | P62889                                  | P62889                                  | 60S ribosomal protein L30                                                                       | Rpl30           |
| 29.26919 | 29.18187 | 29.24898 | P67984                                  | P67984                                  | 60S ribosomal protein L22                                                                       | Rpl22           |
| 26.51803 | 26.69975 | 26.60399 | P68181;H6TMF5;A0A0G2JFT9                | P68181                                  | cAMP-dependent protein kinase catalytic subunit                                                 | Prkac           |
| 28.63547 | 28.64924 | 28.69312 | P70195                                  | P70195                                  | Proteasome subunit beta type-7                                                                  | Psbm7           |
| 25.49838 | 25.5285  | 25.76699 | P82198;Q3UXJ2                           | P82198;Q3UXJ2                           | Transforming growth factor-beta-induced protein 1                                               | Tgfb1           |
| 30.76129 | 30.76129 | 30.80809 | Q02013                                  | Q02013                                  | Aquaporin-1                                                                                     | Aqp1            |
| 26.60399 | 26.61807 | 26.75175 | Q3TCN2                                  | Q3TCN2                                  | Putative phospholipase B-like 2                                                                 | Plb2            |
| 26.61807 | 26.75175 | 26.65949 | Q3UE92;Q6P1B1;S4R1I3;S4R228             | Q3UE92;Q6P1B1;S4R1I3                    | X-prolyl aminopeptidase (Aminopeptidase P)                                                      | Xpnpep1         |
| 27.89157 | 27.48616 | 26.83846 | Q52KR3;A0A286YDW6                       | Q52KR3                                  | Protein prune homolog 2                                                                         | Prune2          |
| 26.0041  | 25.99981 | 25.92931 | Q60668;F6ZV59;G5E8G0;G3X9W0;E9Q2        | Q60668;F6ZV59;G5E8G0;G3X9W0;E9Q2        | Heterogeneous nuclear ribonucleoprotein D                                                       | Hnrnpd          |
| 27.58978 | 27.13124 | 27.44727 | Q61425                                  | Q61425                                  | Hydroxyacyl-coenzyme A dehydrogenase, mitochondrial                                             | Hadh            |
| 26.97596 | 26.97596 | 27.18896 | Q62418                                  | Q62418                                  | Drebrin-like protein                                                                            | Dbln            |
| 29.05051 | 28.96499 | 28.97869 | Q62426                                  | Q62426                                  | Cystatin-B                                                                                      | Cstb            |
| 26.68646 | 26.77706 | 26.80193 | Q6P542                                  | Q6P542                                  | ATP-binding cassette sub-family F member 1                                                      | Abcf1           |
| 26.95394 | 26.86231 | 26.89735 | Q6P5F9;F6YA11                           | Q6P5F9                                  | Exportin-1                                                                                      | Xpo1            |
| 26.24082 | 26.26249 | 26.60399 | Q6PDL0;A0A1D5RMC1;A0A1D5RM94            | Q6PDL0;A0A1D5RMC1;A0A1D5RM94            | Cytoplasmic dynein 1 light intermediate chain                                                   | Dync1l2         |
| 26.63201 | 26.82639 | 26.77706 | Q6P117;P25785;B1AQJ3                    | Q6P117;P25785;B1AQJ3                    | Metalloproteinase inhibitor 2;Metalloproteinase inhibitor 2                                     | Timpt2          |
| 32.16039 | 32.11148 | 32.04466 | Q6ZWW9;Q64525;Q64478;P10854             | Q6ZWW9;Q64525;Q64478                    | Histone H2B type 1-C/E/G;Histone H2B type 1-C/E/G                                               | Hist1h2bc;Hist2 |
| 27.76446 | 27.92592 | 27.84446 | Q78ZM0;O70492;D3Z789;D3Z620             | Q78ZM0;O70492;D3Z789                    | Sorting nexin 3, isoform CRA_b;Sorting nexin 3                                                  | Snx3            |
| 27.2535  | 27.5389  | 27.37451 | Q7TTC1                                  | Q7TTC1                                  | Corneodesmosin                                                                                  | Cdsn            |
| 27.08132 | 27.23535 | 27.14102 | Q80VQ0;J3QMK6;E9Q3E1;F6QPV9             | Q80VQ0                                  | Aldehyde dehydrogenase family 3 member 1                                                        | Aldh3b1         |
| 26.16423 | 25.97596 | 25.87643 | Q8BGD9                                  | Q8BGD9                                  | Eukaryotic translation initiation factor 4B                                                     | Eif4b           |
| 27.80809 | 27.79576 | 27.75175 | Q8BGH2                                  | Q8BGH2                                  | Sorting and assembly machinery component                                                        | Samm50          |
| 26.51503 | 26.38278 | 26.14297 | Q8BJU0;A0A1W2P6P1;A0A1W2P715            | Q8BJU0;A0A1W2P6P1;A0A1W2P715            | Small glutamine-rich tetratricopeptide repeat                                                   | Sgta            |
| 26.82639 | 26.29789 | 26.85043 | Q8C0Z1;F6SQM4;D3Z6P3                    | Q8C0Z1                                  | Protein FAM234A                                                                                 | Fam234a         |
| 24.75939 | 24.48616 | 25.45826 | Q8HWWB2;A7VMS6;E9Q0G4;G3UXE9;V9         | Q8HWWB2                                 | Histocompatibility 2, Q region locus 4                                                          | H2-Q4           |
| 27.31527 | 27.00838 | 27.11148 | Q8VI94                                  | Q8VI94                                  | 2-5-oligoadenylate synthase-like protein 1                                                      | Oasl1           |
| 25.06085 | 23.65403 | 25.90656 | Q91VA7;V9GXV0                           | Q91VA7                                  | Isocitrate dehydrogenase [NAD] subunit, mitochondrial                                           | Ish3b           |
| 27.08132 | 27.11148 | 27.1795  | Q91VC3;A2AFK7;A0A0N4SV8;E9PV04          | Q91VC3;A2AFK7;A0A0N4SV8                 | Eukaryotic translation initiation factor 4A-III;Eukaryotic translation initiation factor 4A-III | Eif4a3          |
| 25.30313 | 25.37119 | 25.06085 | Q91WK2                                  | Q91WK2                                  | Eukaryotic translation initiation factor 3 subunit 4                                            | Eif3h           |
| 26.26428 | 26.391   | 26.58978 | Q924C1                                  | Q924C1                                  | Exportin-5                                                                                      | Xpo5            |
| 26.75175 | 26.83846 | 26.96499 | Q99JY0;D3YXU1                           | Q99JY0;D3YXU1                           | Trifunctional enzyme subunit beta, mitochondrial                                                | Hadhb           |
| 24.48616 | 26.56384 | 26.93157 | Q99K48                                  | Q99K48                                  | Non-POU domain-containing octamer-binding protein                                               | Nono            |
| 24.21697 | 24.391   | 24.30313 | Q99KQ4                                  | Q99KQ4                                  | Nicotinamide phosphoribosyltransferase                                                          | Nampt           |
| 27.95394 | 28.0296  | 28.00838 | Q99PV0;B7ZC27                           | Q99PV0;B7ZC27                           | Pre-mRNA-processing-splicing factor 8;Pre-mRNA-processing-splicing factor 8                     | Prpf8           |
| 28.10649 | 28.18896 | 28.18423 | Q9CPS5;Q9CX56;Q3TG45                    | Q9CPS5;Q9CX56;Q3TG45                    | 26S proteasome non-ATPase regulatory subunit 2                                                  | Psmd8           |
| 26.51051 | 26.69975 | 26.63201 | Q9CQV8;A2A5N1                           | Q9CQV8;A2A5N1                           | 14-3-3 protein beta/alpha;14-3-3 protein beta/alpha                                             | Ywhab           |
| 26.99766 | 27.26249 | 27.00838 | Q9CR62;Q5SX46;Q5SX48                    | Q9CR62;Q5SX46                           | Mitochondrial 2-oxoglutarate/malate carrier                                                     | Slc25a11        |
| 27.85638 | 27.85043 | 27.81421 | Q9CY27;G3UWE1;Q5L2L7;Q3TAN8;A0A0G2JF08  | Q9CY27;G3UWE1;Q5L2L7                    | Very-long-chain enoyl-CoA reductase;MCG1                                                        | Tecr            |
| 27.07112 | 27.13124 | 27.19835 | Q9CZ30;B1AYI9                           | Q9CZ30                                  | Obg-like ATPase 1                                                                               | Ola1            |
| 28.30226 | 28.38278 | 28.33671 | Q9CZ44;A2AT02                           | Q9CZ44;A2AT02                           | NSFL1 cofactor p47                                                                              | Nsf1c           |
|          |          |          | Q9DD051                                 | Q9DD051                                 | Pyruvate dehydrogenase E1 component subunit                                                     | Pdhb            |

|          |          |          |                                                              |                                                          |                                                                                         |              |
|----------|----------|----------|--------------------------------------------------------------|----------------------------------------------------------|-----------------------------------------------------------------------------------------|--------------|
| 27.20769 | 27.10149 | 27.21697 | Q9D0B6                                                       | Q9D0B6                                                   | Protein PBDC1                                                                           | Pbdc1        |
| 27.10149 | 27.34942 | 27.43936 | Q9D1Q6                                                       | Q9D1Q6                                                   | Endoplasmic reticulum resident protein 44                                               | Erp44        |
| 26.80193 | 26.99766 | 26.97596 | Q9D2Y4;D3YV42                                                | Q9D2Y4                                                   | Mixed lineage kinase domain-like protein                                                | Mkl1         |
| 26.04427 | 26.04843 | 26.40243 | Q9D7N9                                                       | Q9D7N9                                                   | Adipocyte plasma membrane-associated protein                                            | Apm1         |
| 27.73247 | 27.76446 | 27.79576 | Q9D8B3;Q9D7F7                                                | Q9D8B3                                                   | Charged multivesicular body protein 4b                                                  | Chmp4b       |
| 26.04427 | 26.20583 | 26.31872 | Q9DB73;G3UZG6;G3UXV8;G3UZ57                                  | Q9DB73;G3UZG6                                            | NADH-cytochrome b5 reductase 1;Cytochrome b5                                            | Cyb5r1       |
| 24.08537 | NaN      | 23.83846 | Q9ESX5;B7ZCL7;F6YUI5;A2AN81;F6S1S5                           | Q9ESX5;B7ZCL7                                            | H/ACA ribonucleoprotein complex subunit 4                                               | Dkc1         |
| 28.45905 | 28.391   | 28.58978 | Q9JIM1;E9PXM6;E9PWY7;E9QZ21;E9QZ31                           | Q9JIM1;E9PXM6                                            | Equilibrative nucleoside transporter 1                                                  | Slc29a1      |
| 28.81421 | 28.70636 | 28.65267 | Q9JJH1                                                       | Q9JJH1                                                   | Ribonuclease 4                                                                          | Rnase4       |
| 26.76446 | 26.71293 | 26.63201 | Q9JKZ2;V9GXDS                                                | Q9JKZ2                                                   | Sodium/myo-inositol cotransporter                                                       | Slc5a3       |
| 26.4073  | 26.48769 | 26.61807 | Q9QXB9                                                       | Q9QXB9                                                   | Developmentally-regulated GTP-binding protein                                           | Drg2         |
| 27.61105 | 27.60399 | 27.69975 | Q9QZD9;A2AE03                                                | Q9QZD9;A2AE03                                            | Eukaryotic translation initiation factor 3 subunit 1                                    | Eif3         |
| NaN      | NaN      | 25.08132 | Q9R002                                                       | Q9R002                                                   | Interferon-activable protein 202                                                        | Ifi202       |
| 27.87994 | 28.07112 | 27.88577 | Q9R1R8;Q9QYF1                                                | Q9R1R8;Q9QYF1                                            | Retinol dehydrogenase 11                                                                | Rdh11        |
| 24.99766 | 24.74919 | 25.57831 | Q9WUD1                                                       | Q9WUD1                                                   | STIP1 homology and U box-containing protein                                             | Stub1        |
| 26.12534 | 26.56238 | 25.55215 | Q9WUP7;A0A087WP81;A0A087WRL3                                 | Q9WUP7;A0A087WP81                                        | Ubiquitin carboxyl-terminal hydrolase isozyme 1                                         | Uchl5        |
| 27.05051 | 27.24445 | 27.24445 | Q9WVE8                                                       | Q9WVE8                                                   | Protein kinase C and casein kinase substrate                                            | Paccin2      |
| 26.55069 | 26.78955 | 26.73892 | Q9WVJ3                                                       | Q9WVJ3                                                   | Carboxypeptidase Q                                                                      | Cpq          |
| 24.1488  | 24.22435 | 23.5285  | Q9WVL3                                                       | Q9WVL3                                                   | Solute carrier family 12 member 7                                                       | Slc12a7      |
| 25.73117 | 26.04843 | 26.04843 | Q9Z1T1;Q9JME5                                                | Q9Z1T1                                                   | AP-3 complex subunit beta-1                                                             | Ap3b1        |
| 28.97596 | 28.98142 | 29.05051 | Q9Z2U1;A0A0G2JF97                                            | Q9Z2U1                                                   | Proteasome subunit alpha type-5                                                         | Pma5         |
| 28.31095 | 28.21697 | 28.35363 | Q9Z2X1;J3QM80;J3QMT0;J3QP45                                  | Q9Z2X1                                                   | Heterogeneous nuclear ribonucleoprotein F                                               | Hnmpf        |
| 24.49228 | 24.44253 | 23.55215 | A0A0A0M7Q6;Q6DFW4;A0A087WQ46;                                | A0A0A0M7Q6;Q6DFW4;A0A087WQ46;                            | Nucleolar protein 58;Nucleolar protein 58 (Fragment)                                    | Nop58        |
| 26.78955 | 26.97596 | 26.55801 | A0A0G2JGP4;Q9D091;P08556;A0A0G2JGP4                          | A0A0G2JGP4;Q9D091;P08556                                 | GTPase NRas (Fragment);GTPase NRas                                                      | Nras         |
| 24.74407 | 25.00196 | 24.61526 | A0A0R4J0D3;Q3TDQ1                                            | A0A0R4J0D3;Q3TDQ1                                        | Dolichyl-diphosphooligosaccharide--protein transferase                                  | Stt3b        |
| 26.11347 | 25.82639 | 25.65403 | A0A2C9F2A2;Q921Q7;A0A286YCR5                                 | A0A2C9F2A2;Q921Q7                                        | Ras and Rab interactor 1                                                                | Rin1         |
| 24.94503 | 25.11744 | 25.29263 | A8DIL0;Q9JL15;Q8C6H0                                         | A8DIL0;Q9JL15;Q8C6H0                                     | Galectin;Galectin-8                                                                     | Lgal8        |
| 24.41054 | 24.40406 | 24.45513 | B7ZW11;A0A1D5RMJ8;Q6ZQ08;A0A1D5RMJ8                          | B7ZW11;A0A1D5RMJ8;Q6ZQ08                                 | CCR4-NOT transcription complex subunit 1                                                | Cnot1        |
| 27.391   | 27.26249 | 27.67303 | D3YWF6;Q7TQI3;D3Z7K0                                         | D3YWF6;Q7TQI3;D3Z7K0                                     | Ubiquitin thioesterase OTUB1;Ubiquitin thioesterase                                     | Otub1        |
| NaN      | NaN      | NaN      | D3Z598;E9QP55;Q8K4G1;E9Q6B8;F6WV98                           | D3Z598;E9QP55;Q8K4G1;E9Q6B8                              | Latent-transforming growth factor beta-binding protein                                  | Ltbp4        |
| 27.79576 | 27.82031 | 27.69312 | D3Z645;Q9QZ88;D3YD55;D3YW98                                  | D3Z645;Q9QZ88;D3YD55;                                    | Vacuolar protein sorting-associated protein 29                                          | Vps29        |
| 27.10149 | 26.36119 | 26.92025 | E9PV44;Q35143                                                | E9PV44;Q35143                                            | ATPase inhibitor, mitochondrial                                                         | Atfp1        |
| 27.86231 | 27.88577 | 28.09648 | E9PYH2;Q91V12                                                | E9PYH2;Q91V12                                            | Cytosolic acyl coenzyme A thioester hydrolase                                           | Acot7        |
| 26.16615 | 26.2021  | 25.94503 | E9Q1S3;Q01405                                                | E9Q1S3;Q01405                                            | Protein transport protein Sec23A                                                        | Sec23a       |
| 25.08132 | 25.22435 | 25.62366 | E9Q405;A0A1C7Z10;K3W4L0;B2RRE2;                              | E9Q405;A0A1C7Z10;K3W4L0;B2RRE2;                          | Unconventional myosin-XVIIIa                                                            | Myo18a       |
| 26.03591 | 25.87173 | 26.16423 | F8WHM5;Q61543;E9PW8;F6RSH1                                   | F8WHM5;Q61543                                            | Golgi apparatus protein 1 (Fragment);Golgi apparatus protein 1 (Fragment)               | Glg1         |
| 25.1055  | 24.81909 | 25.93832 | G3UXC7;G3UWL5                                                | G3UXC7;G3UWL5                                            | ADAMTS-like 3                                                                           | Adamts3      |
| 27.76446 | 27.63893 | 27.38278 | G3UXL2;Q9D7G0                                                | G3UXL2;Q9D7G0                                            | Phosphoribosyl pyrophosphate synthetase 1                                               | Prps13;Prps1 |
| 25.27142 | 25.27498 | 25.65676 | G3UY19;G3UW86;G3UWQ7;Q99K43;G3UWZ26;P50431;G3UY11;G3UZZ9     | G3UY19;G3UW86;G3UWQ7;Q99K43;G3UWZ26;P50431;G3UY11;G3UZZ9 | Protein regulator of cytokinesis 1                                                      | Prc1         |
| 26.55215 | 26.90885 | 27.54628 | G3XA09;O88879;Q80VR5                                         | G3XA09;O88879                                            | Serine hydroxymethyltransferase, cytosolic                                              | Shmt1        |
| 25.85994 | 25.58692 | 25.83123 | G5E8J0;O35516                                                | G5E8J0;O35516                                            | Apoptotic protease-activating factor 1                                                  | Apa1         |
| NaN      | 24.46139 | 24.75939 | H7BWZ3;Q9JIM7;D3Z2F7;D3Z2F8;A0A087WQ46                       | H7BWZ3;Q9JIM7;D3Z2F7;D3Z2F8                              | Neurogenic locus notch homolog protein 2                                                | Notch2       |
| 28.82031 | 28.93719 | 28.97049 | H7BX95;Q6PDM2;F7AI47;Q9D0B0                                  | H7BX95;Q6PDM2                                            | Actin-related protein 2/3 complex subunit 3                                             | Arp3         |
| 25.75685 | 25.81909 | 25.76192 | O08599;A0A140LHJ4                                            | O08599                                                   | Serine/arginine-rich-splicing factor 1;Serine/arginine-rich-splicing factor 1           | Srsf1        |
| 23.65403 | 25.03171 | 25.391   | O09164                                                       | O09164                                                   | Syntaxin-binding protein 1                                                              | Stxbp1       |
| 20.81127 | 21.10789 | 21.0789  | O35114                                                       | O35114                                                   | Extracellular superoxide dismutase [Cu-Zn]                                              | Sod3         |
| 28.62854 | 28.53148 | 28.48616 | O35593                                                       | O35593                                                   | Lysosome membrane protein 2                                                             | Scarb2       |
| 27.62506 | 27.89735 | 27.66628 | O88207                                                       | O88207                                                   | 26S proteasome non-ATPase regulatory subunit 1                                          | Psm14        |
| 26.28736 | 26.21141 | 26.4186  | O88958;D3Z0R5;D3YWR1;Q9CR9                                   | O88958;D3Z0R5                                            | Collagen alpha-1(V) chain                                                               | Col5a1       |
| 26.24989 | 26.81421 | 26.45826 | P01027;H3BKW9                                                | P01027                                                   | Glucosamine-6-phosphate isomerase 1;Glucosamine-6-phosphate isomerase 1                 | Gnppd1       |
| 23.68646 | 23.79947 | 23.92252 | P01887                                                       | P01887                                                   | Complement C3                                                                           | C3           |
| 29.25575 | 29.06856 | 29.39917 | P01901;Q3TH01;G3UXW2;A0A0B4J1G3                              | P01901;Q3TH01;G3UXW2                                     | Beta-2-microglobulin                                                                    | B2m          |
| 28.88285 | 28.54628 | 28.76129 | P10639                                                       | P10639                                                   | H-2 class I histocompatibility antigen, K-B alpha chain                                 | H2-K1        |
| 29.05827 | 29.0296  | 29.22619 | P11438                                                       | P11438                                                   | Thioredoxin                                                                             | Txn          |
| 28.61105 | 28.58978 | 28.54259 | P13439;D6RJ62                                                | P13439                                                   | Lysosome-associated membrane glycoprotein 2                                             | Lamp1        |
| 25.68913 | 25.52253 | 25.87877 | P17809;A0A140LIU2;G3UYL0;A2A7P3;G3UZZ26;P50431;G3UY11;G3UZZ9 | P17809                                                   | Uridine 5-monophosphate synthase                                                        | Umps         |
| 29.26472 | 29.19131 | 29.29132 | P23242;A0A1W2P793;A0A1W2P8A3                                 | P23242                                                   | Solute carrier family 2, facilitated glucose transporter                                | Slc2a1       |
| 26.1776  | 26.24808 | 26.35279 | P28658                                                       | P28658                                                   | Gap junction alpha-1 protein                                                            | Gja1         |
| 27.15074 | 26.95394 | 27.07112 | P30681;A0A1B0GQX9                                            | P30681;A0A1B0GQX9                                        | Ataxin-10                                                                               | Atxn10       |
| NaN      | 22.39885 | NaN      | P31324;H3BK84;A0A0A6YX73;Q8K1M3                              | P31324;H3BK84                                            | High mobility group protein B2;High mobility group protein B2                           | Hmgb2        |
| 26.23169 | 25.7415  | 26.06085 | P31786;MOQWU8;Q4VWZ5;D3Z563                                  | P31786;MOQWU8;Q4VWZ5;D3Z563                              | cAMP-dependent protein kinase type II-beta                                              | Pkrii2b      |
| 29.34308 | 29.37036 | 29.41337 | P34022;H7BX22                                                | P34022;H7BX22                                            | Acyl-CoA-binding protein                                                                | Dbi          |
| 29.07877 | 29.09396 | 29.12386 | P35283;A2CG35                                                | P35283;A2CG35                                            | Ran-specific GTPase-activating protein                                                  | Ranbp1       |
| 26.02538 | 25.72858 | 25.6811  | P35505;D3Z2R9                                                | P35505                                                   | Ras-related protein Rab-12                                                              | Rab12        |
| 24.1946  | 24.82881 | NaN      | P35550;A0A140LIR6                                            | P35550                                                   | Fumarylacetoacetase                                                                     | Fah          |
| 25.59833 | 26.239   | 25.73635 | P42227;B7ZC18                                                | P42227;B7ZC18                                            | rRNA 2-O-methyltransferase fibrillarin                                                  | Fbl          |
| 25.38113 | 25.20955 | 25.47383 | P45377;P21300                                                | P45377                                                   | Signal transducer and activator of transcription 3                                      | Stat3        |
| 27.51653 | 27.61105 | 27.47846 | P49717                                                       | P49717                                                   | Aldose reductase-related protein 2                                                      | Akr1b8       |
| 29.88285 | 29.83394 | 29.65096 | P49722;Q8BKE0                                                | P49722;Q8BKE0                                            | DNA replication licensing factor MCM4                                                   | Mcm4         |
| 26.12731 | 26.17379 | 26.76446 | P50518;A0A0N4SW07;A0A0N4SWA3;A0A0N4SWA4                      | P50518;A0A0N4SW07                                        | Proteasome subunit alpha type-2;Proteasome subunit alpha type-2                         | Pma2         |
| 31.72923 | 31.55728 | 31.44825 | P55264;A0A286YCD7;A0A286YCN3                                 | P55264;A0A286YCD7                                        | V-type proton ATPase subunit E 1;V-type proton ATPase subunit E 1                       | Atp6v1e1     |
| 24.89966 | 25.1488  | 24.7543  | P57759;F8WJIA;F8WIM7;D6RG87                                  | P57759                                                   | Protein S100-A11                                                                        | S100a11      |
| 27.14102 | 27.05051 | 27.11148 | P61022;B0R091                                                | P61022;B0R091                                            | Adenosine kinase;Adenosine kinase (Fragment)                                            | Adk          |
| 26.88577 | 26.64581 | 26.48616 | P62071;A0A1B0GR75                                            | P62071                                                   | Endoplasmic reticulum resident protein 29                                               | Erp29        |
| 27.41538 | 27.4073  | 27.52402 | P62267                                                       | P62267                                                   | Calcineurin B homologous protein 1                                                      | Chp1         |
| 30.18423 | 30.28692 | 30.23078 | P62748;A0A1Y7VMK3;P84075;A2A7R5;                             | P62748;A0A1Y7VMK3                                        | Ras-related protein R-Ras2                                                              | Rras2        |
| 25.97158 | 25.93382 | 26.16997 | P62900;A0A0A6YX26;A0A0A6YX3                                  | P62900;A0A0A6YX26                                        | 40S ribosomal protein S23                                                               | Rps23        |
| 28.77706 | 28.97049 | 28.94559 | P62983                                                       | P62983                                                   | Hippocalcin-like protein 523                                                            | Hpcal1       |
| 30.79266 | 30.96774 | 30.73731 | P63028;D3YU75                                                | P63028;D3YU75                                            | 60S ribosomal protein L31                                                               | Rpl31        |
| 30.41337 | 30.37244 | 30.04791 | P63073;A0A0G2JG75;A0A0G2JH04;A0A0G2JH05                      | P63073;A0A0G2JG75;A0A0G2JH04                             | Ubiquitin-40S ribosomal protein S27a                                                    | Rps27a       |
| 27.63201 | 27.69312 | 27.83244 | P63085;F6VEI7                                                | P63085                                                   | Translationaly-controlled tumor protein                                                 | Tpt1         |
| 27.53148 | 27.56092 | 27.66628 | P70206;Q8OU2                                                 | P70206                                                   | Eukaryotic translation initiation factor 4E;Eukaryotic translation initiation factor 4E | Eif4e        |
| 24.76446 | 25.86467 | 25.35783 | P70290;B7ZCL8;A2AN84;B7ZC19                                  | P70290;B7ZCL8;A2AN84;B7ZC19                              | Mitogen-activated protein kinase 1                                                      | Mapk1        |
| 26.18139 | 26.05466 | 25.79947 | P70404                                                       | P70404                                                   | Plexin-A1                                                                               | Plexa1       |
| 28.08132 | 28.06599 | 28.28912 | P70677;A0A1B0GRX1                                            | P70677                                                   | 55 kDa erythrocyte membrane protein                                                     | Mpp1         |
| 27.41538 | 27.391   | 27.30661 | P84096;A0A1B0GSL4                                            | P84096                                                   | Isocitrate dehydrogenase [NAD] subunit gamma                                            | Ihd3g        |
| 27.30661 | 27.43141 | 27.2803  |                                                              |                                                          | Caspase-3                                                                               | Casp3        |
|          |          |          |                                                              |                                                          | Rho-related GTP-binding protein RhoG                                                    | Rhog         |



|          |          |          |                                   |                       |                                                |               |
|----------|----------|----------|-----------------------------------|-----------------------|------------------------------------------------|---------------|
| NaN      | NaN      | NaN      | P01897                            | P01897                | H-2 class I histocompatibility antigen, L-D al | H2-L          |
| 26.83846 | 26.87408 | 27.05051 | P09671                            | P09671                | Superoxide dismutase [Mn], mitochondrial       | Sod2          |
| 23.20955 | NaN      | 22.31562 | P0D0V2;E9QKL6                     | P0D0V2;E9QKL6         | Interferon-activable protein 204               | Ifi204        |
| 23.78955 | 23.55215 | 23.07887 | P10810                            | P10810                | Monocyte differentiation antigen CD14          | Cd14          |
| 25.85043 | 25.58978 | 25.66221 | P14602;D3YZ06                     | P14602;D3YZ06         | Heat shock protein beta-1                      | Hspb1         |
| 29.06343 | 29.09144 | 28.76762 | P19157;P46425                     | P19157                | Glutathione S-transferase P 1                  | Gstp1         |
| 27.10149 | 26.95394 | 27.11148 | P20108                            | P20108                | Thioredoxin-dependent peroxide reductase       | Prdx3         |
| 24.74919 | 25.06497 | 25.05672 | P27046;F6QMB7                     | P27046                | Alpha-mannosidase 2                            | Man2a1        |
| 23.31008 | 21.75939 | 23.77957 | P29452                            | P29452                | Caspase-1                                      | Casp1         |
| 28.0296  | 28.13124 | 27.61105 | P30412                            | P30412                | Peptidyl-prolyl cis-trans isomerase C          | Ppic          |
| 25.12534 | 25.24264 | 25.68913 | P32067;A2AR07;D6RI87;F6SXM5       | P32067;A2AR07         | Lupus La protein homolog;Lupus La protein      | L             |
| 25.55215 | 25.4073  | 25.35111 | P36916                            | P36916                | Guanine nucleotide-binding protein-like 1      | Gnl1          |
| 28.16039 | 27.99766 | 28.0296  | P43274                            | P43274                | Histone H1.4                                   | Hist1h1e      |
| 26.97596 | 25.88577 | 25.93607 | P46061                            | P46061                | Ran GTPase-activating protein 1                | Rangap1       |
| 27.1795  | 27.42342 | 27.35783 | P47879;H3BLB7;H3BJT2              | P47879;H3BLB7         | Insulin-like growth factor-binding protein 4   | Igfbp4        |
| 24.1332  | 24.17188 | 24.61526 | P50428;F6QGM0                     | P50428                | Arylsulfatase A                                | Arsa          |
| 26.45356 | 26.48769 | 26.54185 | P54823                            | P54823                | Probable ATP-dependent RNA helicase DDX6       | Ddx6          |
| 25.59263 | 25.55801 | 25.52552 | P55302;F6WMD1                     | P55302                | Alpha-2-macroglobulin receptor-associated      | Lrpap1        |
| 20.40665 | NaN      | 21.51653 | P57787;B1ATM1;B1ATM2              | P57787;B1ATM1;B1ATM2  | Monocarboxylate transporter 4;Monocarbo        | Slc16a3       |
| 27.56092 | 27.55362 | 27.15074 | P60521                            | P60521                | Gamma-aminobutyric acid receptor-associat      | Gabrapl2      |
| 26.95394 | 27.18896 | 27.05051 | P61226                            | P61226                | Ras-related protein Rap-2b                     | Rap2b         |
| 27.37451 | 27.27142 | 27.04009 | P62331                            | P62331                | ADP-ribosylation factor 6                      | Arf6          |
| 25.63478 | 25.96939 | 25.96058 | P62897;CON__P62894;P00015         | P62897                | Cytochrome c, somatic                          | Cytc          |
| 28.30226 | 28.26696 | 28.35783 | P63168;Q80Z57                     | P63168                | Dynein light chain 1, cytoplasmic              | Dynll1        |
| 31.33565 | 31.31419 | 30.96086 | P68433                            | P68433                | Histone H3.1                                   | Hist1h3a      |
| 24.51051 | NaN      | 23.88577 | P70193                            | P70193                | Leucine-rich repeats and immunoglobulin-li     | Lrig1         |
| 28.73892 | 28.57903 | 28.65267 | P70349;B0R1E3                     | P70349;B0R1E3         | Histidine triad nucleotide-binding protein 1   | Hint1         |
| 24.35111 | 24.33074 | 24.06085 | P70372                            | P70372                | ELAV-like protein 1                            | Elavl1        |
| 26.1055  | 26.01691 | 26.04218 | P70460                            | P70460                | Vasodilator-stimulated phosphoprotein          | Vasp          |
| 28.68979 | 29.0531  | 28.84146 | P97300;H3BIX4;Z4YLB7;H3BKA7;AOA0A | P97300;H3BIX4;Z4YLB7  | Neuroplastin;Neuroplastin (Fragment)           | Nptn          |
| 31.13614 | 31.10525 | 31.06085 | P99024;G3UZR1                     | P99024                | Tubulin beta-5 chain                           | Tubb5         |
| 28.00838 | 28.01372 | 28.01903 | P99026                            | P99026                | Proteasome subunit beta type-4                 | Psbm4         |
| 30.42342 | 30.51089 | 30.58441 | P99027                            | P99027                | 60S acidic ribosomal protein P2                | Rplp2         |
| 23.79947 | 23.82881 | 24.2535  | Q00PI9                            | Q00PI9                | Heterogeneous nuclear ribonucleoprotein U      | Hnrrnpul2     |
| 25.33756 | 25.36119 | 25.77706 | Q08509;Q3UGL1;D3Z5I5;D3Z7F4       | Q08509;Q3UGL1         | Epidermal growth factor receptor kinase sub    | Eps8          |
| 27.73247 | 27.75812 | 28.06599 | Q09143;E9Q3N1;D3Z161              | Q09143;E9Q3N1         | High affinity cationic amino acid transporter  | Slc7a1        |
| 26.00838 | 26.12337 | 25.90656 | Q11136;G3UXC5                     | Q11136                | Xaa-Pro dipeptidase                            | Pepd          |
| 26.14102 | 26.07928 | 26.15074 | Q3TWW4;P84091                     | Q3TWW4;P84091         | AP-2 complex subunit mu                        | Ap2m1         |
| 24.01903 | 25.51953 | 25.30661 | Q52KC3;P49718                     | Q52KC3;P49718         | DNA helicase;DNA replication licensing facto   | Mcm5          |
| 26.38936 | 26.50142 | 26.20955 | Q55S83;Q60634                     | Q55S83;Q60634         | Flotillin 2, isoform CRA_a;Flotillin-2         | Flot2         |
| 24.22435 | NaN      | 23.81909 | Q55UR0;F6RUL9                     | Q55UR0                | Phosphoribosylformylglycinamide synthas        | Pfas          |
| 25.04009 | 24.96279 | 24.83364 | Q5SX75;Q60716;B0QZH3;B0QZH1;Q5SX  | Q5SX75;Q60716         | Procollagen-proline, 2-oxoglutarate 4-dioxy    | P4ha2         |
| NaN      | NaN      | NaN      | Q61468                            | Q61468                | Mesothelin                                     | Msln          |
| 26.56529 | 26.57542 | 26.52552 | Q62087;D6RU12;H3BL07              | Q62087                | Serum paraoxonase/lactonase 3                  | Pon3          |
| 25.01052 | 24.64306 | 24.47383 | Q62318                            | Q62318                | Transcription intermediary factor 1-beta       | Trim28        |
| 26.81421 | 28.42342 | 26.72598 | Q63870                            | Q63870                | Collagen alpha-2(VII) chain                    | Col7a1        |
| 26.61807 | 26.73892 | 26.69975 | Q64191;B7ZNK6                     | Q64191;B7ZNK6         | N(4)-(beta-N-acetylglucosaminyl)-L-asparagi    | Aga           |
| 25.38772 | 25.42342 | 24.83364 | Q64669                            | Q64669                | NAD(P)H dehydrogenase [quinone] 1              | Nqo1          |
| 26.27498 | 26.31872 | 26.60399 | Q64735;AOA0A6VVT1;AOA0A6YXN9;AO   | Q64735;AOA0A6VVT1;AOA | Complement component receptor 1-like pro       | Cr1l          |
| 25.44884 | 25.75939 | 26.2803  | Q6A028                            | Q6A028                | Switch-associated protein 70                   | Swap70        |
| 25.317   | 24.96279 | 24.98902 | Q6NXL1                            | Q6NXL1                | Sec24-related gene family, member D (S. ce     | Sec24d        |
| 27.2803  | 26.67303 | 26.80193 | Q6P5F6;AOA087WRC8;AOA087WQF7      | Q6P5F6                | Zinc transporter ZIP10                         | Slc39a10      |
| 26.88577 | 26.37285 | 26.72598 | Q6P8X1;AOA1W2P701                 | Q6P8X1;AOA1W2P701     | Sorting nexin-6                                | Snx6          |
| 26.85043 | 26.71293 | 27.15074 | Q6ZQI3                            | Q6ZQI3                | Malectin                                       | Mlec          |
| 27.12139 | 26.87408 | 26.13907 | Q76LS9                            | Q76LS9                | Ubiquitin carboxyl-terminal hydrolase MIND     | Mindy1        |
| 27.01903 | 26.98685 | 27.11148 | Q791V5;A2AFW6;Q9D050;D6RCZ1       | Q791V5;A2AFW6;Q9D050  | Mitochondrial carrier homolog 2                | Mctc2         |
| 24.05258 | 22.70345 | 24.12534 | Q80T21                            | Q80T21                | ADAMTS-like protein 4                          | Adamtsl4      |
| 25.02749 | 24.76446 | 25.13712 | Q80TM9;F7AFP3;F6PY46;F6YR29;F6ZL6 | Q80TM9                | Nischarin                                      | Nisch         |
| 27.79576 | 27.47073 | 27.5969  | Q8BK64                            | Q8BK64                | Activator of 90 kDa heat shock protein ATPa    | Ahsa1         |
| 27.11148 | 26.52253 | 26.54481 | Q8BU14                            | Q8BU14                | Translocation protein SEC62                    | Sec62         |
| 22.97246 | 22.8423  | NaN      | Q8BV57                            | Q8BV57                | Soluble scavenger receptor cysteine-rich do    | Scsd5         |
| 25.67303 | 24.84326 | 25.63201 | Q8BWZ3;G3UZX9;G3UZ51;F6XQZ4       | Q8BWZ3                | N-alpha-acetyltransferase 25, NatB auxiliary   | Naa25         |
| 25.72858 | 26.05466 | 25.90196 | Q8C052;AOA1D5RLY6                 | Q8C052;AOA1D5RLY6     | Microtubule-associated protein 1S              | Map1s         |
| 25.55215 | 25.01052 | 24.49838 | Q8C156                            | Q8C156                | Condensin complex subunit 2                    | Ncaph         |
| 26.75175 | 26.95394 | 26.72598 | Q8C2Q7;O35737                     | Q8C2Q7;O35737         | Heterogeneous nuclear ribonucleoprotein H      | Hnrrnp1       |
| 28.07623 | 28.27586 | 28.20303 | Q8C4U3                            | Q8C4U3                | Secreted frizzled-related protein 1            | Sfrp1         |
| 24.6811  | 24.21697 | 23.93157 | Q8CBB7;P22892                     | Q8CBB7;P22892         | AP-1 complex subunit gamma-1                   | Ap1g1         |
| 26.64581 | 26.85043 | 26.73892 | Q8CFE6                            | Q8CFE6                | Sodium-coupled neutral amino acid transpo      | Slc38a2       |
| 25.38772 | 25.4073  | 25.53148 | Q8CI19                            | Q8CI19                | Platelet-derived growth factor C               | Pdgfc         |
| 25.83364 | 25.32732 | 26.20023 | Q8K124                            | Q8K124                | Pleckstrin homology domain-containing fam      | Plekho2       |
| 26.1946  | 25.94056 | 26.03591 | Q8K2Q7;AOA0A6YWK4                 | Q8K2Q7                | BRO1 domain-containing protein BROX            | Brox          |
| NaN      | NaN      | NaN      | Q8K482                            | Q8K482                | EMILIN-2                                       | Emilin2       |
| 29.2957  | 29.27808 | 29.12633 | Q8R143;EOCXB5;F6TFF2;EOCY65       | Q8R143;EOCXB5         | Pituitary tumor-transforming gene 1 protein    | Pttg1ip       |
| 25.12534 | 25.45513 | 25.92252 | Q8R3X6;Q9R087                     | Q8R3X6;Q9R087         | Glypican-6                                     | Gpc6          |
| 26.80193 | 26.72598 | 26.4008  | Q8VDU3;Q8C714                     | Q8VDU3;Q8C714         | Apol9a protein;Apolipoprotein L 9b             | Apol9a;Apol9b |
| NaN      | NaN      | NaN      | Q8VI78                            | Q8VI78                | Phospholipase A1 member A                      | Pla1a         |
| 25.69179 | 25.43301 | 25.21327 | Q8VIJ6                            | Q8VIJ6                | Splicing factor, proline- and glutamine-rich   | Sfpq          |
| 27.80193 | 27.58262 | 27.86821 | Q91V89                            | Q91V89                | Serine/threonine-protein phosphatase 2A 5      | Ppp2r5d       |
| 25.51352 | 25.45826 | 25.55801 | Q91VR8                            | Q91VR8                | Protein BRICK1                                 | Brk1          |
| 26.03171 | 25.97158 | 25.99118 | Q91XH5;G3UXX3;Q64105;G3UZ79       | Q91XH5;G3UXX3;Q64105  | Septipaterin reductase                         | Spr           |
| 27.15074 | 27.23535 | 27.47846 | Q921F2;AOA087WRZ5;Q8R0B4;Q8BLD4   | Q921F2;AOA087WRZ5;Q8  | TAR DNA-binding protein 43;MCG16669, iso       | Tardbp        |
| 24.12534 | NaN      | NaN      | Q921X9                            | Q921X9                | Protein disulfide-isomerase A5                 | Pdia5         |
| 25.49534 | 25.1795  | 25.62087 | Q922J9;D3Z5W6;D3Z4N9;D3Z072       | Q922J9;D3Z5W6;D3Z4N9  | Fatty acyl-CoA reductase 1;Fatty acyl-CoA re   | Far1          |
| 23.93157 | 23.98468 | 23.60964 | Q99KP6                            | Q99KP6                | Pre-mRNA-processing factor 19                  | Prpf19        |
| 26.75175 | 27.06085 | 26.86231 | Q99KV1                            | Q99KV1                | DnaJ homolog subfamily B member 11             | Dnajb11       |
| 27.58978 | 27.14102 | 27.5389  | Q99L04                            | Q99L04                | Dehydrogenase/reductase SDR family mem         | Dhrs1         |
| 25.48308 | 25.42342 | 26.17379 | Q99LF4                            | Q99LF4                | tRNA-splicing ligase RtcB homolog              | Rtcb          |
| 25.04843 | 24.92252 | 25.2021  | Q99ME2                            | Q99ME2                | WD repeat-containing protein 6                 | Wdr6          |

|          |          |          |                                                                   |                                                                   |                                                                                                         |               |
|----------|----------|----------|-------------------------------------------------------------------|-------------------------------------------------------------------|---------------------------------------------------------------------------------------------------------|---------------|
| 28.44332 | 28.73892 | 29.10899 | Q99P91;Q8BVA0                                                     | Q99P91;Q8BVA0                                                     | Transmembrane glycoprotein NMB                                                                          | Gpmb          |
| 26.33245 | 26.32903 | 26.57542 | Q9CQ62                                                            | Q9CQ62                                                            | 2,4-dienoyl-CoA reductase, mitochondrial                                                                | Decr1         |
| 28.90311 | 28.68979 | 28.75175 | Q9CQW2;A0A0N4SVB8                                                 | Q9CQW2;A0A0N4SVB8                                                 | ADP-ribosylation factor-like protein 8B                                                                 | Ar18b         |
| 26.68646 | 26.36119 | 26.2589  | Q9CR26;F6W5Q8;F8WJC2                                              | Q9CR26;F6W5Q8                                                     | Vacuolar protein sorting-associated protein 33                                                          | Vta1          |
| 26.15074 | 26.11744 | 26.05672 | Q9CWX8                                                            | Q9CWX8                                                            | Sorting nexin-2                                                                                         | Snx2          |
| 26.98685 | 27.06085 | 26.9428  | Q9CX00                                                            | Q9CX00                                                            | IST1 homolog                                                                                            | Ist1          |
| 25.20583 | 25.03171 | 25.43619 | Q9CX86                                                            | Q9CX86                                                            | Heterogeneous nuclear ribonucleoprotein A                                                               | HnrrnpA0      |
| 26.27498 | 26.2803  | 26.36786 | Q9CXW3;A0A0A6YY29                                                 | Q9CXW3                                                            | Calcylin-binding protein                                                                                | Cacypb        |
| 24.70767 | 26.14686 | 26.30487 | Q9CY64;A2ASB8;A2ASB7;A2ASB1                                       | Q9CY64                                                            | Biliverdin reductase A                                                                                  | BlvrA         |
| 26.28912 | 26.17188 | 26.09346 | Q9D0F3                                                            | Q9D0F3                                                            | Protein ERGIC-53                                                                                        | Lman1         |
| 26.65949 | 26.48769 | 26.81421 | Q9D1M4                                                            | Q9D1M4                                                            | Eukaryotic translation elongation factor 1 epsilon                                                      | Eef1e1        |
| 25.54333 | 25.44253 | 25.32045 | Q9DBF1;G3UYR8;G3UY72;E9Q1H3;E9Q1H4                                | Q9DBF1;G3UYR8;G3UY72                                              | Alpha-amino adipic semialdehyde dehydrogenase                                                           | Aldh7a1       |
| 27.35783 | 27.47073 | 27.54628 | Q9DBG7;F6VF36                                                     | Q9DBG7                                                            | Signal recognition particle receptor subunit 4                                                          | SrprA         |
| NaN      | NaN      | NaN      | Q9EPK8;D3Z1H7;E9Q7L7;D3Z1H6                                       | Q9EPK8;D3Z1H7;E9Q7L7;D3Z1H6                                       | Transient receptor potential cation channel subunit 7                                                   | Trpv4         |
| 24.89041 | 25.10149 | 25.20955 | Q9ET54;D3Z1J5;A0A1W2P7G1;Q5DTJ9                                   | Q9ET54;D3Z1J5                                                     | Palladin;Palladin (Fragment)                                                                            | Palld         |
| 27.52402 | 27.69312 | 27.5389  | Q9JIZ9;Q5F284                                                     | Q9JIZ9;Q5F284                                                     | Phospholipid scramblase 3;Phospholipid scramblase 3                                                     | Plsc3         |
| 26.30661 | 26.11545 | 26.57542 | Q9JLV1                                                            | Q9JLV1                                                            | BAG family molecular chaperone regulator 3                                                              | Bag3          |
| 24.56384 | 25.10149 | 24.85757 | Q9QXX4                                                            | Q9QXX4                                                            | Calcium-binding mitochondrial carrier protein                                                           | Slc25a13      |
| 25.87643 | 26.0874  | 26.08335 | Q9QZB7;A0A1Y7VL71;A0A1Y7VM21                                      | Q9QZB7                                                            | Actin-related protein 10                                                                                | Actr10        |
| 24.86703 | 24.90885 | 24.55215 | Q9WTK5                                                            | Q9WTK5                                                            | Nuclear factor NF-kappa-B p100 subunit                                                                  | Nfkb2         |
| 25.00624 | 24.98902 | 24.93607 | Q9Z2I0                                                            | Q9Z2I0                                                            | Mitochondrial proton/calcium exchanger protein 1                                                        | Letm1         |
| 26.5285  | 26.67303 | 26.92025 | Q9Z2I9                                                            | Q9Z2I9                                                            | Succinate--CoA ligase [ADP-forming] subunit 2                                                           | SuclA2        |
| 27.29789 | 27.27142 | 27.2535  | A0A087WQE6;A0A087WNT1;P83940;A0A0A6YVU8;Q9JKV1;D3YUD8             | A0A087WQE6;A0A087WNT1;P83940;A0A0A6YVU8;Q9JKV1;D3YUD8             | Elongin-C (Fragment);Elongin-C                                                                          | Eloc          |
| 25.94056 | 26.01265 | 26.09547 | A0A0G2IDW7;Q6ZWU9;A0A0G2IG29;A0A0R4J0R1;O70404;A0A0U1RPE8         | A0A0G2IDW7;Q6ZWU9;A0A0G2IG29;A0A0R4J0R1;O70404;A0A0U1RPE8         | MCG119397;Proteasomal ubiquitin receptor 40S ribosomal protein S27 (Fragment);40S ribosomal protein S27 | Rps27         |
| 28.7357  | 28.71293 | 28.90311 | A0A0R4J1Z3;Q9CR67;Q9CZM3                                          | A0A0R4J1Z3;Q9CR67                                                 | Vesicle-associated membrane protein 8                                                                   | Vamp8         |
| 25.98685 | 26.53742 | 26.46295 | A0A1B0GT92;Q9Z1E4;A0A1B0GR90                                      | A0A1B0GT92;Q9Z1E4                                                 | Transmembrane protein 33                                                                                | Tmem33        |
| 25.76446 | 25.67034 | 25.43619 | A0A1D5RLL3;Q8BG67;Q8BWCS                                          | A0A1D5RLL3;Q8BG67                                                 | Glycogen [starch] synthase;Glycogen [starch] synthase                                                   | Gys1          |
| 25.97596 | 26.1055  | 26.317   | A0A286YDJ7;A0A286YDX4;A0A286YDC1                                  | A0A286YDJ7;A0A286YDX4;A0A286YDC1                                  | Protein EFR3 homolog A                                                                                  | Efr3a         |
| 24.03591 | 24.2021  | 23.57542 | A0A286YDT5;G5E8Q8;A0A286YD74                                      | A0A286YDT5;G5E8Q8                                                 | Anion exchange protein;Anion exchange protein 4                                                         | Adc4a7        |
| 26.93157 | 27.15074 | 26.76446 | A2AUR7;Q9D031;Q01730                                              | A2AUR7;Q9D031;Q01730                                              | Adhesion G protein-coupled receptor F5 (Fragment)                                                       | Adgrf5        |
| 22.07235 | 21.66275 | 22.92615 | A2BE93;Q9EQU5;A2BE92                                              | A2BE93;Q9EQU5;A2BE92                                              | Ras suppressor protein 1                                                                                | Rsu1          |
| 25.49838 | 25.44253 | 26.07725 | B1AT82;Q9D0M1;B1AT83;B1AT84                                       | B1AT82;Q9D0M1                                                     | Protein SET (Fragment);Protein SET                                                                      | Set           |
| 26.21512 | 26.56674 | 26.51202 | B1AZ46;Q8BKK1                                                     | B1AZ46;Q8BKK1                                                     | MCG6846, isoform CRA_c;Phosphoribosyl pyrophosphate                                                     | Prpsap1       |
| 26.99766 | 27.09144 | 26.88577 | B2RUJ2;B7ZNX6;Q80TH2                                              | B2RUJ2;B7ZNX6;Q80TH2                                              | Brain-specific angiogenesis inhibitor 1-associated protein 2                                            | Baiap2        |
| 24.15653 | 24.28207 | 25.2021  | D3YYI8;O09106;Q8BQ10;A0A0R4J008;E0CZ72;P28740;F8VQ42              | D3YYI8;O09106;Q8BQ10;A0A0R4J008;E0CZ72;P28740;F8VQ42              | ErbB2ip protein;Erbin                                                                                   | Erb           |
| 24.54038 | 24.46139 | 24.239   | E9PWG6                                                            | E9PWG6                                                            | Histone deacetylase;Histone deacetylase 1;Histone deacetylase 1                                         | Gm10093;Hdac  |
| NaN      | 23.91342 | NaN      | E9PXB7;Q8CFI0;A0A286YDR6                                          | E9PXB7;Q8CFI0                                                     | Kinesin-like protein;Kinesin-like protein KIF2                                                          | Kif2a         |
| 25.32389 | 25.08942 | 25.27853 | E9PZ18                                                            | E9PZ18                                                            | Non-SMC condensin I complex, subunit G                                                                  | Ncapg         |
| 25.29263 | 25.29263 | 25.46139 | E9Q748;P97430                                                     | E9Q748;P97430                                                     | E3 ubiquitin-protein ligase NEDD4-like                                                                  | Nedd4l        |
| 25.56674 | 26.77706 | 26.44253 | F6VQ81;V9GWU5;Q3TUJ9;Q8BKP1;Q3TUJ9;G3UZM9;Q8BWW9;G3UXH4;G3UYD6    | F6VQ81;V9GWU5;Q3TUJ9;Q8BKP1;Q3TUJ9;G3UZM9;Q8BWW9;G3UXH4;G3UYD6    | Activating signal integrator 1 complex subunit 1                                                        | Asc3          |
| 26.05466 | 25.60399 | 25.56674 | G3X9S2;A0A0R4J1Q7;P06802;E9QQ26                                   | G3X9S2;A0A0R4J1Q7;P06802;E9QQ26                                   | Antileukoprotease                                                                                       | Slpi          |
| NaN      | NaN      | NaN      | G3XA48;P58044;H3BLF8;H3BLP1;H3BKE1                                | G3XA48;P58044;H3BLF8                                              | Tumor protein D54 (Fragment);Tumor protein D54                                                          | Tpd52i2       |
| 27.29789 | 27.38278 | 26.29088 | G5E850;P56395;EOCY88                                              | G5E850;P56395                                                     | Serine/threonine-protein kinase N2                                                                      | Pkn2          |
| NaN      | 22.56151 | 22.08537 | O35226                                                            | O35226                                                            | Ectonucleotide diphosphatase/phosphodiesterase 2                                                        | Enpp1         |
| 24.317   | 24.239   | 24.81909 | O35685                                                            | O35685                                                            | Isopentenyl-diphosphate Delta-isomerase 1                                                               | Idi1          |
| 25.98251 | 25.99118 | 25.92931 | O54774                                                            | O54774                                                            | Cytochrome b-5, isoform CRA_a;Cytochrome b-5                                                            | Cyb5a         |
| 27.98142 | 27.90311 | 27.97596 | O88968                                                            | O88968                                                            | 26S proteasome non-ATPase regulatory subunit 3                                                          | Psmcd         |
| 27.85043 | 27.61807 | 27.75175 | P12399;A0A286YDF0;A0A286YD41;A0A17426;A0A140LIG7                  | P12399;A0A286YDF0                                                 | Nuclear migration protein nudC                                                                          | Nudc          |
| 27.01903 | 27.3662  | 27.32389 | P17426;A0A140LIG7                                                 | P17426                                                            | AP-3 complex subunit delta-1                                                                            | Ap3d1         |
| 26.5389  | 26.87408 | 27.32389 | P21995                                                            | P21995                                                            | Transcobalamin-2                                                                                        | Tcn2          |
| 24.92705 | 24.32389 | 24.63755 | P23591                                                            | P23591                                                            | Protein CTLA-2-alpha;Uncharacterized protein                                                            | Ctla2a        |
| 24.7543  | 25.08942 | 24.84805 | P24638;B7ZCF4;B7ZCF5                                              | P24638                                                            | AP-2 complex subunit alpha-1                                                                            | Ap2a1         |
| 23.57542 | 24.24627 | 23.62087 | P32020                                                            | P32020                                                            | Embigin                                                                                                 | Emb           |
| 27.65949 | 27.60399 | 27.58978 | P32233;F7BQ65                                                     | P32233                                                            | GDP-L-fucose synthase                                                                                   | Tsta3         |
| 25.85519 | 26.19272 | 26.30487 | P34884                                                            | P34884                                                            | Lysosomal acid phosphatase                                                                              | Acp2          |
| 25.05258 | 24.77455 | 24.84805 | P41731;A0A1W2P8C6                                                 | P41731;A0A1W2P8C6                                                 | Non-specific lipid-transfer protein                                                                     | Scp2          |
| 25.7024  | 25.37119 | 26.01052 | P42669                                                            | P42669                                                            | Developmentally-regulated GTP-binding protein                                                           | Drg1          |
| 26.34266 | 26.18896 | 25.96939 | P46467                                                            | P46467                                                            | Macrophage migration inhibitory factor                                                                  | Mif           |
| 30.40324 | 30.46295 | 30.40324 | P58021;E9PZ69                                                     | P58021;E9PZ69                                                     | CD63 antigen;Tetraspanin (Fragment)                                                                     | Cd63          |
| 30.18423 | 30.20769 | 30.06085 | P60867                                                            | P60867                                                            | Transcriptional activator protein Pur-alpha                                                             | Pura          |
| 27.98685 | 27.60399 | 27.87994 | P61620;A0A0A6YVQ7                                                 | P61620                                                            | Vacuolar protein sorting-associated protein 33                                                          | Vpsa          |
| 26.4346  | 26.417   | 26.77706 | P62965                                                            | P62965                                                            | Transmembrane 9 superfamily member 2;Transmembrane 9 superfamily member 2                               | Tm9sf2        |
| 24.74919 | 25.03591 | 24.84326 | P63024;B0QZNS;P63044;A0A0N4SUV3;P63328;E9Q6P2;G3X8U7;E0CZ78;P4845 | P63024;B0QZNS;P63044;A0A0N4SUV3;P63328;E9Q6P2;G3X8U7;E0CZ78;P4845 | 40S ribosomal protein S20                                                                               | Rps20         |
| 29.70306 | 29.66628 | 29.64065 | P68037;D3YZS3                                                     | P68037;D3YZS3                                                     | Protein transport protein Sec61 subunit alpha-1                                                         | Sec61a1       |
| 26.89735 | 27.4073  | 27.86231 | P97310                                                            | P97310                                                            | Cellular retinoic acid-binding protein 1                                                                | Crabp1        |
| 26.49534 | 26.32217 | 26.35279 | Q05186                                                            | Q05186                                                            | Vesicle-associated membrane protein 3;Vesicle-associated membrane protein 3                             | Vamp3;Vamp2   |
| 27.1947  | 27.64581 | 27.56092 | Q05BC8;A2A4N5;A2A4N8;A2A4N7;K3W                                   | Q05BC8;A2A4N5;A2A4N8;A2A4N7;K3W                                   | Serine/threonine-protein phosphatase 2B catalytic subunit                                               | Ppp3ca;Ppp3cb |
| 25.40406 | 25.62366 | 25.23169 | Q05186                                                            | Q05186                                                            | Ubiquitin-conjugating enzyme E2 L3                                                                      | Ube2l3        |
| 27.65949 | 27.47073 | 28.11644 | Q05BC8;A2A4N5;A2A4N8;A2A4N7;K3W                                   | Q05BC8;A2A4N5;A2A4N8;A2A4N7;K3W                                   | DNA replication licensing factor MCM2                                                                   | Mcm2          |
| 24.27498 | NaN      | 23.65403 | Q05186                                                            | Q05186                                                            | Reticulocalbin-1                                                                                        | Rcn1          |
| 26.07112 | 26.02749 | 26.16806 | Q05BC8;A2A4N5;A2A4N8;A2A4N7;K3W                                   | Q05BC8;A2A4N5;A2A4N8;A2A4N7;K3W                                   | Nbr1 protein;Next to BRCA1 gene 1 protein                                                               | Nbr1          |
| 25.59263 | 25.44884 | 25.64856 | Q0PD20;B1AQD3;Q64008;B1AQD4;F7B                                   | Q0PD20;B1AQD3;Q64008                                              | Rab34;Ras-related protein Rab-34                                                                        | Rab34         |
| 25.79452 | 25.79699 | 25.85994 | Q2TBE6                                                            | Q2TBE6                                                            | Phosphatidylinositol 4-kinase type 2-alpha                                                              | Pik42a        |
| 25.1488  | 25.55508 | 25.13712 | Q3TIJ5;Q80W45;Q00262;D3YY94;A0A0Q3TTF6;H3BKU1;G3UWS4;Q7TNP2;H3B   | Q3TIJ5;Q80W45;Q00262;D3YY94;A0A0Q3TTF6;H3BKU1;G3UWS4;Q7TNP2;H3B   | Syntaxin-2;Syntaxin-2 (Fragment)                                                                        | Sxt2          |
| NaN      | NaN      | NaN      | Q3U0V2                                                            | Q3U0V2                                                            | Serine/threonine-protein phosphatase 2A catalytic subunit                                               | Ppp2r1b       |
| 25.7415  | 25.48922 | 25.09748 | Q3U8S1;A2APM5;A2APM3;A2APM4;E9                                    | Q3U8S1;A2APM5;A2APM3;A2APM4;E9                                    | Tumor necrosis factor receptor type 1-associated protein 2                                              | Tradd         |
| 24.20955 | 24.46139 | 24.2535  | Q3UKN6;P81117                                                     | Q3UKN6;P81117                                                     | CD44 antigen                                                                                            | Cd44          |
| 29.95394 | 29.94    | 29.85935 | Q3UM45;A0A087WRA7;F6TGJ2                                          | Q3UM45;A0A087WRA7                                                 | Nucleobindin-2                                                                                          | Nucb2         |
| 25.08537 | 25.06085 | 25.1488  | Q5EG47;Q8BRR8                                                     | Q5EG47                                                            | Protein phosphatase 1 regulatory subunit 7;Protein phosphatase 1 regulatory subunit 7                   | Ppp1r7        |
| 26.08942 | 25.88809 | 26.22251 | Q5SSP3;O35874                                                     | Q5SSP3;O35874                                                     | 5-AMP-activated protein kinase catalytic subunit                                                        | Pkkaa1        |
| 26.16806 | 26.24627 | 26.03381 | Q60817;P70670                                                     | Q60817;P70670                                                     | Amino acid transporter;Neutral amino acid transporter                                                   | Slc1a4        |
| 27.2803  | 26.55655 | 27.10149 | Q60973;A2AFI9;A2AFJ1;F6ZLC6;F6U539                                | Q60973;A2AFI9;A2AFJ1;F6ZLC6;F6U539                                | Nascent polypeptide-associated complex subunit 1                                                        | Naca          |
| 28.43539 | 28.41538 | 28.27586 | Q61009                                                            | Q61009                                                            | Histone-binding protein RBBP7                                                                           | Rbbp7         |
| 26.4073  | 26.64581 | 26.52552 | Q61205;D3Z7E6;D3Z2X5;Q8CA83                                       | Q61205;D3Z7E6;D3Z2X5;Q8CA83                                       | Scavenger receptor class B member 1                                                                     | Scarb1        |
| 27.85043 | 28.258   | 28.23991 | Q62086                                                            | Q62086                                                            | Platelet-activating factor acetylhydrolase IB type 1                                                    | Pafah1b3      |
| 26.23535 | 26.48001 | 26.42822 | Q64133                                                            | Q64133                                                            | Serum paraoxonase/arylesterase 2                                                                        | Pon2          |
| 26.96499 | 26.71293 | 27.47846 |                                                                   |                                                                   | Amine oxidase (flavin-containing) A                                                                     | Maoa          |
| 26.1946  | 26.10149 | 26.32732 |                                                                   |                                                                   |                                                                                                         |               |

|          |          |          |                                   |                        |                                                 |                |
|----------|----------|----------|-----------------------------------|------------------------|-------------------------------------------------|----------------|
| 27.55362 | 27.5389  | 27.61807 | Q64310;EOCX9;F7CH13               | Q64310;EOCX9;F7CH13    | Surfeit locus protein 4;Surfeit locus protein 4 | Surf4          |
| 26.391   | 26.26607 | 26.67303 | Q6P1B9;O08539                     | Q6P1B9;O08539          | Bin1 protein;Myc box-dependent-interacting      | Bin1           |
| 25.36453 | 25.45513 | 25.78207 | Q6P9R2                            | Q6P9R2                 | Serine/threonine-protein kinase OSR1            | Oxsr1          |
| 28.54628 | 28.70306 | 28.39509 | Q6ZWZ4;P47964;D3YX71              | Q6ZWZ4;P47964          | 60S ribosomal protein L36                       | Rpl36          |
| 22.75328 | 22.68859 | 23.50446 | Q7TNC4;E9Q715;Q05CX5;D3Z765;A0A0  | Q7TNC4;E9Q715;Q05CX5   | Putative RNA-binding protein Luc7-like 2;Luc7   | Luc7l2         |
| 24.6811  | 24.56384 | 24.83846 | Q80ZW2                            | Q80ZW2                 | Protein THEM6                                   | Them6          |
| 25.92479 | 25.77957 | 25.38443 | Q8BKE6                            | Q8BKE6                 | Cytochrome P450 20A1                            | Cyp20a1        |
| 25.54628 | 25.52552 | 25.76951 | Q8BM72;D3Z0Y0                     | Q8BM72                 | Heat shock 70 kDa protein 13                    | Hspa13         |
| 25.97378 | 26.54628 | 25.83364 | Q8BP48;A0A0G2JFL1                 | Q8BP48                 | Methionine aminopeptidase 1                     | Metap1         |
| 25.56384 | 25.24627 | 25.80193 | Q8BQ47;D3Z0T5                     | Q8BQ47;D3Z0T5          | Protein canopy homolog 4;Protein canopy h       | Cnpy4          |
| 25.07316 | 25.46762 | 25.73117 | Q8BT07                            | Q8BT07                 | Centrosomal protein of 55 kDa                   | Cep55          |
| 25.73376 | 25.91342 | 25.76699 | Q8BYU6                            | Q8BYU6                 | Torsin-1A-interacting protein 2                 | Tor1aip2       |
| 26.86231 | 27.41538 | 27.22619 | Q8C3X8                            | Q8C3X8                 | Lipase maturation factor 2                      | Lmf2           |
| 24.83364 | 24.91798 | 24.56964 | Q8CCJ3                            | Q8CCJ3                 | E3 UFM1-protein ligase 1                        | Ufl1           |
| 25.76951 | 25.87643 | 26.16039 | Q8CE08;A0A11LSUTO                 | Q8CE08;A0A11LSUTO      | Prostatic acid phosphatase;Prostatic acid ph    | Acpp           |
| 25.02749 | 24.93607 | 24.97158 | Q8CIB5;A6X941;A6X940              | Q8CIB5;A6X941          | Fermitin family homolog 2;Fermitin family h     | Fermt2         |
| 25.85994 | 26.1795  | 25.37451 | Q8K0C9                            | Q8K0C9                 | GDP-mannose 4,6 dehydratase                     | Gmrd5          |
| NaN      | 23.40406 | NaN      | Q8QZR4;A0A11LSUK4                 | Q8QZR4                 | Out at first protein homolog                    | Oaf            |
| NaN      | NaN      | 23.68646 | Q8ROY6;A0A0N4SW56                 | Q8ROY6                 | Cytosolic 10-formyltetrahydrofolate dehydr      | Aldh11         |
| 27.90885 | 27.90885 | 27.39917 | Q8R5C5;EOCZD4;EOCYB4              | Q8R5C5                 | Beta-centractin                                 | Actr1b         |
| 25.49838 | 25.59263 | 26.10149 | Q8VHE0                            | Q8VHE0                 | Translocation protein SEC63 homolog             | Sec63          |
| 25.44569 | 25.53148 | 25.85043 | Q91WG4                            | Q91WG4                 | Elongator complex protein 2                     | Elp2           |
| 26.33926 | 26.65949 | 26.04009 | Q91YN9;A0A087WNN9                 | Q91YN9                 | BAG family molecular chaperone regulator 2      | Bag2           |
| 25.96058 | 26.07316 | 25.96499 | Q91YZ8;A3KFU5;A3KFU8;Q6PHQ9;D3Z   | Q91YZ8;A3KFU5;A3KFU8;  | Polyadenylate-binding protein                   | Pabpc4;Pab     |
| 27.07112 | 27.04009 | 27.12139 | Q91ZJ5                            | Q91ZJ5                 | UTP-glucose-1-phosphate uridylyltransfera       | Ugg2           |
| 28.31095 | 28.14102 | 28.14589 | Q921J2                            | Q921J2                 | GTP-binding protein Rheb                        | Rheb           |
| 26.77706 | 26.69975 | 26.82639 | Q924B0;Q80ZJ2;O55023;A0A0A6YW07   | Q924B0;Q80ZJ2;O55023   | Inositol-1-monophosphatase;Inositol mono        | Impa1          |
| 25.89966 | 26.06291 | 25.9955  | Q99JR1                            | Q99JR1                 | Sideroflexin-1                                  | Sfxn1          |
| 24.20955 | 25.01478 | 25.17188 | Q99JY8                            | Q99JY8                 | Phospholipid phosphatase 3                      | Ppp3           |
| 25.67842 | 25.78706 | 25.83605 | Q99K30                            | Q99K30                 | Epidermal growth factor receptor kinase sub     | Eps8l2         |
| 26.56238 | 26.77706 | 26.55215 | Q99KF1;A0A286YD55                 | Q99KF1;A0A286YD55      | Transmembrane emp24 domain-containing           | Tmed9          |
| 25.92025 | 25.93157 | 26.27142 | Q99LE6                            | Q99LE6                 | ATP-binding cassette sub-family F member 2      | Abcf2          |
| 24.82396 | 25.1946  | 24.90885 | Q9CQ92;G3X9U9;D3YZ32              | Q9CQ92;G3X9U9          | Mitochondrial fission 1 protein                 | Fis1           |
| 26.67303 | 26.86231 | 26.67303 | Q9CQD1;A2A5F5;A2A5F6              | Q9CQD1                 | Ras-related protein Rab-5A                      | Rab5a          |
| 26.2589  | 26.1035  | 26.31527 | Q9CQT1;F6YY88                     | Q9CQT1;F6YY88          | Methylthioribose-1-phosphate isomerase;M        | Mri1           |
| 27.05051 | 27.10149 | 27.16997 | Q9CQU0                            | Q9CQU0                 | Thioredoxin domain-containing protein 12        | Txndc12        |
| 30.61982 | 30.56638 | 30.55728 | Q9CR57;A0A11LSUF6                 | Q9CR57                 | 60S ribosomal protein L14                       | Rpl14          |
| 24.64306 | 24.1795  | 24.69179 | Q9CRB1;O54974;D3Z141              | Q9CRB1;O54974;D3Z141   | Galectin;Galectin-7;Galectin (Fragment)         | Lgals7         |
| 28.43539 | 27.95394 | 27.83846 | Q9CWF2                            | Q9CWF2                 | Tubulin beta-2B chain                           | Tubb2b         |
| 25.22435 | 24.97158 | 25.06497 | Q9CY00;A2AKQ8;Q99J38              | Q9CY00;A2AKQ8;Q99J38   | Tetrapeptide repeat protein 30B;Tetra           | Ttc30b;Ttc30a2 |
| 25.23169 | 25.5285  | 24.44253 | Q9CZT5                            | Q9CZT5                 | Vasorin                                         | Vasn           |
| 24.85757 | 24.97158 | 25.21697 | Q9CZW5                            | Q9CZW5                 | Mitochondrial import receptor subunit TOM       | Tomm70         |
| 25.7103  | 25.98033 | 25.80931 | Q9CZX7                            | Q9CZX7                 | Type 2 phosphatidylinositol 4,5-bisphosphat     | Pip4p2         |
| 26.54922 | 26.82639 | 26.76446 | Q9CZY3;B7ZBY7;E9PY39;B2KF55;A6X92 | Q9CZY3;B7ZBY7;E9PY39;B | Ubiquitin-conjugating enzyme E2 variant 1;      | Ubc2v1         |
| 25.39428 | 25.32732 | 25.32732 | Q9D024;B1AR93;F7C265              | Q9D024                 | Coiled-coil domain-containing protein 47        | Ccdc47         |
| 27.24445 | 27.12139 | 27.45513 | Q9D0M3                            | Q9D0M3                 | Cytochrome c1, heme protein, mitochondria       | Cyc1           |
| NaN      | NaN      | NaN      | Q9D1D6                            | Q9D1D6                 | Collagen triple helix repeat-containing prote   | Cthrc1         |
| 25.95615 | 25.86231 | 25.98251 | Q9D6U8                            | Q9D6U8                 | Protein FAM162A                                 | Fam162a        |
| 28.01903 | 28.14102 | 28.1795  | Q9D8L3;Q62186                     | Q9D8L3;Q62186          | Signal sequence receptor, delta;Translocon-     | Ssr4           |
| 26.71293 | 26.48001 | 26.11545 | Q9D8U8                            | Q9D8U8                 | Sorting nexin-5                                 | Snx5           |
| 25.74407 | 25.69179 | 25.51953 | Q9DBZ5;Q3TY56;A0A140LJ59          | Q9DBZ5;Q3TY56          | Eukaryotic translation initiation factor 3 sub  | Eif3k          |
| 26.45826 | 26.51202 | 26.37451 | Q9DC16;F6SLP4                     | Q9DC16;F6SLP4          | Endoplasmic reticulum-Golgi intermediate c      | Ergic1         |
| NaN      | NaN      | NaN      | Q9DCA5;F6WEP7                     | Q9DCA5;F6WEP7          | Ribosome biogenesis protein BRX1 homolog        | Brix1          |
| 24.47383 | 24.35783 | 24.8811  | Q9EPL2                            | Q9EPL2                 | Calsyntenin-1                                   | Clstn1         |
| 25.97815 | 26.09346 | 26.08942 | Q9EPT5                            | Q9EPT5                 | Solute carrier organic anion transporter fam    | Slco2a1        |
| 26.28207 | 25.85757 | 26.40243 | Q9ER38;M0QWH2;A0A087WRX4;A0A0     | Q9ER38;M0QWH2          | Torsin-3A                                       | Tor3a          |
| 26.31872 | 26.29439 | 26.78955 | Q9ERE7;D3YVR4                     | Q9ERE7;D3YVR4          | LRP chaperone MESD;LRP chaperone MESD           | Mesd           |
| 23.74919 | 23.54038 | 22.93157 | Q9JHI5                            | Q9JHI5                 | Isovaleryl-CoA dehydrogenase, mitochondria      | Ivd            |
| 24.42342 | 24.30313 | 24.58118 | Q9J10;Q9J11                       | Q9J10;Q9J11            | Serine/threonine-protein kinase 3;Serine/th     | Stk3;Stk4      |
| 25.69179 | 25.37782 | 25.64306 | Q9JKB1;P58321                     | Q9JKB1;P58321          | Ubiquitin carboxyl-terminal hydrolase isozy     | Uchl3;Uchl4    |
| 24.64306 | 24.89966 | 25.1795  | Q9QXJ2;E9QJX9;Q9WVL2              | Q9QXJ2;E9QJX9;Q9WVL2   | Signal transducer and activator of transcript   | Stat2          |
| NaN      | NaN      | NaN      | Q9R001                            | Q9R001                 | A disintegrin and metalloproteinase with thr    | Adamts5        |
| 26.33926 | 26.13712 | 26.18707 | Q9R0N0                            | Q9R0N0                 | Galactokinase                                   | Galk1          |
| 27.97596 | 27.77077 | 27.49381 | Q9R1P1;D3YUM8                     | Q9R1P1                 | Proteasome subunit beta type-3                  | Psmb3          |
| 25.54922 | 25.1946  | 26.19272 | Q9WUK2                            | Q9WUK2                 | Eukaryotic translation initiation factor 4H     | Eif4h          |
| 26.88577 | 27.04009 | 27.16997 | Q9WUM3;D3YUG6                     | Q9WUM3                 | Coronin-1B                                      | Coro1b         |
| 26.27498 | 26.35616 | 26.28912 | Q9WUM5;A0A0N4SVU4                 | Q9WUM5                 | Succinate--CoA ligase [ADP/GDP-forming] su      | Suclg1         |
| 24.69179 | 25.2571  | 24.60964 | Q9Z175;E9Q0X7                     | Q9Z175;E9Q0X7          | Lysyl oxidase homolog 3                         | Loxl3          |
| 26.10149 | 26.21512 | 26.44095 | Q9Z1D1                            | Q9Z1D1                 | Eukaryotic translation initiation factor 3 sub  | Eif3g          |
| 25.04843 | 25.02327 | 24.51051 | Q9Z1G3                            | Q9Z1G3                 | V-type proton ATPase subunit C 1                | Atp6v1c1       |
| 24.42982 | 24.06085 | 24.1488  | A0A087WQF8;A0A087WP48;A0A087W     | A0A087WQF8;A0A087WP    | Kinectin                                        | Ktn1           |
| 26.01691 | 25.93607 | 25.92025 | A0A087WQS2;Q9CQC6;A0A087WPF9;A    | A0A087WQS2;Q9CQC6      | Basic leucine zipper and W2 domain-contain      | Bzw1           |
| 27.391   | 27.10149 | 27.22619 | A0A0G2JD14;O09172;H3BJA3;F6VNW5   | A0A0G2JD14;O09172;H3B  | Glutamate--cysteine ligase regulatory subun     | Gclm           |
| 24.78457 | 26.80193 | 25.57254 | A0A0J9YUZ4;P63158;A0A0J9YUD8;D3YZ | A0A0J9YUZ4;P63158;A0A  | High mobility group protein B1 (Fragment);      | Hmgb1          |
| 24.77957 | 25.12928 | 25.06497 | A0A0N4SVL9;Q9CQR6;A0A0N4SVE2;A0   | A0A0N4SVL9;Q9CQR6      | Serine/threonine-protein phosphatase;Serin      | Ppp6c          |
| 27.15074 | 26.87408 | 26.87408 | A0A0N4SW28;Q9DAS9;A0A0N4SVT3      | A0A0N4SW28;Q9DAS9;A0   | Guanine nucleotide-binding protein subunit      | Gng12          |
| 26.85043 | 26.47228 | 25.80193 | A0A0N4SW73;Q8R361                 | A0A0N4SW73;Q8R361      | Rab11 family-interacting protein 5              | Rab11fp5       |
| 25.2856  | 25.01903 | 25.03171 | A0A0R4IZY0;Q8C1A5                 | A0A0R4IZY0;Q8C1A5      | Thimet oligopeptidase                           | Thop1          |
| 26.11347 | 26.03591 | 25.78457 | A0A0R4J005;E9QP62;Q99JW4;Q9D7B2;  | A0A0R4J005;E9QP62;Q99  | LIM and senescent cell antigen-like-containi    | Lims1          |
| 25.1332  | 25.14492 | 24.65949 | A0A0R4J034;Q99K01;D3YZA7          | A0A0R4J034;Q99K01      | MCG129810, isoform CRA_c;Pyridoxal-depe         | Pdxdc1         |
| 24.56964 | 25.08132 | 24.70767 | A0A0R4J1E3;Q9QX56;F7CPL2          | A0A0R4J1E3;Q9QX56      | Drebrin                                         | Dbrn1          |
| 24.79452 | 24.58692 | 24.75939 | A0A140LHA2;Q9WVA3;A0A140LIM5;A0   | A0A140LHA2;Q9WVA3;A0   | Mitotic checkpoint protein BUB3                 | Bub3           |
| 27.15074 | 27.04009 | 26.98685 | A0A1B0G5S8;Q9CQM9;A0A1B0GSD3;A0   | A0A1B0G5S8;Q9CQM9      | Glutaredoxin-3                                  | Glxr3          |
| 25.03591 | 24.76446 | 24.60399 | A0A1W2P7Q6;Q9CRT8;A0A1W2P7V1      | A0A1W2P7Q6;Q9CRT8      | Exportin-T                                      | Xpot           |
| 25.17188 | 25.55215 | 25.5285  | A2AUK7;A2AUK8;A2AUK6;A2AUK5;E9P   | A2AUK7;A2AUK8;A2AUK6   | Band 4.1-like protein 1                         | Epb411         |
| 23.05092 | NaN      | 23.391   | A2AWF8;A2AWF9;E9Q457;Q64455       | A2AWF8;A2AWF9;E9Q457   | Receptor-type tyrosine-protein phosphatase      | Ptprj          |
| 24.6811  | 24.85281 | 25.00196 | B0R030;Q9D3L3;O09044;E9Q8A1;B0R0  | B0R030;Q9D3L3;O09044;  | Synaptosomal-associated protein (Fragment)      | Snap23         |
| 24.93607 | 25.1055  | 25.30661 | D3YU17;Q8VCM8                     | D3YU17;Q8VCM8          | Nicalin                                         | Nicalin        |

|          |          |          |                                   |                        |                                                |                |
|----------|----------|----------|-----------------------------------|------------------------|------------------------------------------------|----------------|
| 25.75685 | 25.84086 | 26.20023 | D3YUV1;Q99145;A0A0J9YTX8;A0A0J9Y  | D3YUV1;Q99145          | Nuclear receptor-binding protein               | Nrbp1          |
| NaN      | NaN      | NaN      | D3YUY3;F8W18;P70182;F8WHW6;O70    | D3YUY3;F8W18;P70182    | Phosphatidylinositol 4-phosphate 5-kinase t    | Pip5k1a        |
| 25.48922 | 25.27853 | 25.59833 | D3Z0F5;Q88545;F6QK86              | D3Z0F5;Q88545          | COP9 signalosome complex subunit 6             | Cops6          |
| 24.62645 | 24.1795  | 23.83846 | D3Z1U9;D3YUM1;Q91YT0;D3Z0K1;D3Y   | D3Z1U9;D3YUM1;Q91YT0   | NADH dehydrogenase [ubiquinone] flavopro       | Ndufv1         |
| 28.35783 | 28.27142 | 28.31527 | D3Z6I8;E9Q7Q3                     | D3Z6I8;E9Q7Q3          | Tropomyosin alpha-3 chain                      | Tpm3           |
| NaN      | 23.29614 | NaN      | D3Z6S1;Q8BM55                     | D3Z6S1;Q8BM55          | Transmembrane protein 214                      | Tmem214        |
| 28.86821 | 29.0427  | 28.94    | D3Z7C6;Q9R0Q7                     | D3Z7C6;Q9R0Q7          | Prostaglandin E synthase 3                     | Ptges3         |
| 24.27498 | 24.61526 | 24.84805 | D6REG4;Q91Z53;B1AXQ0              | D6REG4;Q91Z53          | Glyoxylate reductase/hydroxyppyruvate redu     | Ghrpr          |
| 24.92705 | 24.75939 | 25.24627 | E9PUF7;Q61210;F6ZN61              | E9PUF7;Q61210;F6ZN61   | Rho guanine nucleotide exchange factor 1       | Arhgef1        |
| 25.37451 | 25.48616 | 25.12928 | E9PUX0;Q80WJ7;F6ZQL0;F6QHD1;F6QF  | E9PUX0;Q80WJ7          | Protein LYRIC                                  | Mtdh           |
| 25.31354 | 25.38113 | 25.69975 | E9PV22;Q505F5                     | E9PV22;Q505F5          | Leucine-rich repeat-containing protein 47      | Lrrc47         |
| 25.26069 | 24.87643 | 24.36453 | E9PVK4;Q0HA38                     | E9PVK4;Q0HA38          | Tetratricopeptide repeat protein 21B           | Ttc21b         |
| 24.62087 | 24.52235 | 24.74919 | E9PZC3;Q923D2;E9PZC4;A0A0U1RP07   | E9PZC3;Q923D2;E9PZC4   | Flavin reductase (NADPH)                       | Blvrb          |
| NaN      | NaN      | NaN      | E9Q151;Q8VBW1;F6UKB4;E9Q6T2       | E9Q151;Q8VBW1;F6UKB4   | Transporter;Sodium- and chloride-depende       | Slc6a8;Slc6a   |
| 24.18707 | 24.32389 | 24.37119 | E9Q1F5;A0A1L1SUF0                 | E9Q1F5                 | Myosin VC                                      | Myo5c          |
| 25.16423 | 23.44253 | 25.62087 | E9Q5L3;Q9DBL1;A0A140LHL4          | E9Q5L3;Q9DBL1          | Short/branched chain-specific acyl-CoA dehyd   | Acad5b         |
| 24.95837 | 24.417   | 25.01478 | E9Q682;E9PY46                     | E9Q682;E9PY46          | Intraflagellar transport protein 140 homolog   | Ift140         |
| 28.15074 | 28.47073 | 28.41538 | F6QL70;Q5M8M8;P47915;A0A1L1SS27;  | F6QL70;Q5M8M8;P47915   | 60S ribosomal protein L29                      | Gm17669;Rpl29  |
| 25.46451 | 25.81176 | 25.80193 | F7BX26;Q60676                     | F7BX26;Q60676          | Serine/threonine-protein phosphatase (Frag     | Ppp5c          |
| 24.12534 | 23.55215 | NaN      | G3UW30;F6ZHD8;Q9D6Y9              | G3UW30;F6ZHD8;Q9D6Y9   | 1,4-alpha-glucan-branching enzyme              | Glb1           |
| 28.55362 | 28.54995 | 28.64238 | G3UYV7;P62858                     | G3UYV7;P62858          | 40S ribosomal protein S28 (Fragment);40S r     | Rps28          |
| 26.08942 | 26.18329 | 26.24808 | G3X977;Q61703;Q3UEG7              | G3X977;Q61703;Q3UEG7   | Inter-alpha trypsin inhibitor, heavy chain 2;H | Iih2           |
| 25.22435 | 24.67573 | 25.68913 | G3X9J6;E9Q9M1;Q3V1L4              | G3X9J6;E9Q9M1;Q3V1L4   | 5-nucleotidase, cytosolic II, isoform CRA_b;C  | Nt5c2          |
| 27.44727 | 27.5969  | 27.48616 | G5E8R1;G5E8R0;E9Q455              | G5E8R1;G5E8R0;E9Q455   | Tropomyosin 1, alpha, isoform CRA_j;Tropo      | Tpm1           |
| 22.76344 | NaN      | NaN      | G5E8R3;E9QPD7;Q05920              | G5E8R3;E9QPD7;Q05920   | Pyruvate carboxylase;Pyruvate carboxylase,     | Pcx;Pc         |
| 26.2535  | 26.01265 | 26.29088 | K9J7B2;Q64435;D3YZE6;D3Z7G0;D3YZ9 | K9J7B2;Q64435;D3YZE6;D | UDP-glucuronosyltransferase;UDP-glucuron       | Ugt1a6b;Ugt1a  |
| 23.417   | 23.48001 | 23.81909 | O08582                            | O08582                 | GTP-binding protein 1                          | Gtpbp1         |
| 26.46139 | 26.65949 | 26.86231 | O35344                            | O35344                 | Importin subunit alpha-4                       | Kpna3          |
| 25.64581 | 25.55801 | 25.87173 | O54984;A0A1B0GRE1                 | O54984                 | ATPase Asna1                                   | Asna1          |
| 24.417   | 24.97158 | 24.60964 | O70572;D6RGM4                     | O70572                 | Sphingomyelin phosphodiesterase 2              | Smpd2          |
| 24.98902 | NaN      | NaN      | O88531;B1B0P8;B1B0P9              | O88531                 | Palmitoyl-protein thioesterase 1               | Ppt1           |
| 27.38278 | 26.4999  | 27.20769 | O88543;F6YCA7;D3Z036              | O88543                 | COP9 signalosome complex subunit 3             | Cops3          |
| 24.02749 | 25.45826 | 25.62087 | O89017                            | O89017                 | Legumain                                       | Lgmn           |
| 28.06599 | 28.40324 | 27.99226 | P00405                            | P00405                 | Cytochrome c oxidase subunit 2                 | Mtco2          |
| 27.92592 | 28.04009 | 27.87408 | P02463;A0A1B0GRC0;A0A1B0GS17      | P02463;A0A1B0GRC0;A0A  | Collagen alpha-1(IV) chain;Collagen alpha-1    | Col4a1         |
| NaN      | NaN      | NaN      | P03975                            | P03975                 | IgE-binding protein                            | Iap            |
| 26.38607 | 26.61807 | 26.41054 | P10922                            | P10922                 | Histone H1.0                                   | H1f0           |
| 27.60399 | 27.21697 | 27.64581 | P12787                            | P12787                 | Cytochrome c oxidase subunit 5A, mitochon      | Cox5a          |
| 24.28207 | 24.12534 | 24.27498 | P13011;Q99PL7;P13516;Q6T707       | P13011;Q99PL7;P13516   | Acyl-CoA desaturase 2;Acyl-CoA desaturase      | Scd2;Scd3;Scd1 |
| 27.29789 | 27.3662  | 27.26249 | P19783;MOQW7                      | P19783                 | Cytochrome c oxidase subunit 4 isoform 1;C     | Cox4i1         |
| 25.42662 | 25.48922 | 25.4008  | P27048;P63163;A0A0G2JGN4          | P27048;P63163;A0A0G2J  | Small nuclear ribonucleoprotein-associated     | Snrbp;Snrpn    |
| 24.10149 | NaN      | 23.31008 | P28076;A0A0R4J256;G3UYK5          | P28076;A0A0R4J256      | Proteasome subunit beta type-9;Proteasom       | Psmb9          |
| NaN      | NaN      | NaN      | P28301                            | P28301                 | Protein-lysine 6-oxidase                       | Lox            |
| 24.97158 | 25.18329 | 24.93607 | P28571;E9Q517;E9Q3V0;E9QA02;E9Q3  | P28571;E9Q517;E9Q3V0;E | Sodium- and chloride-dependent glycine tra     | Slc6a9         |
| NaN      | NaN      | NaN      | P28667                            | P28667                 | MARCKS-related protein                         | Marcks1        |
| 25.12928 | 25.23169 | 25.20955 | P30285;E9Q9E4;E9PZX7;D3YWB0;D6RH  | P30285;E9Q9E4;E9PZX7   | Cyclin-dependent kinase 4;Cyclin-depende       | Cdk4           |
| 28.01372 | 28.09144 | 27.92592 | P35456;A0A0U1RNN0                 | P35456;A0A0U1RNN0      | Urokinase plasminogen activator surface rec    | Plaur          |
| 26.80193 | 27.06085 | 26.99766 | P39876;E9QAB2                     | P39876                 | Metalloproteinase inhibitor 3                  | Timp3          |
| 31.81955 | 31.72923 | 31.50142 | P40240                            | P40240                 | CD9 antigen                                    | Cd9            |
| NaN      | 22.58233 | 22.46762 | P43275                            | P43275                 | Histone H1.1                                   | Hist1h1a       |
| 25.66763 | 25.98251 | 26.09949 | P45878                            | P45878                 | Peptidyl-prolyl cis-trans isomerase FKBP2      | Fkbp2          |
| 30.35153 | 30.13614 | 29.92592 | P47955                            | P47955                 | 60S acidic ribosomal protein P1                | Rpl1           |
| 25.61246 | 25.72598 | 25.38113 | P58742                            | P58742                 | Aladin                                         | Aaas           |
| 26.28736 | 26.47537 | 26.61807 | P59325;Q8BVV6;A0A1Y7VKT5;A0A1Y7   | P59325;Q8BVV6          | Eukaryotic translation initiation factor 5     | Eif5           |
| 25.239   | 25.04843 | 24.76951 | P61211;F8WIB1;E9Q006              | P61211;F8WIB1          | ADP-ribosylation factor-like protein 1;ADP-ri  | Arl1           |
| 29.17712 | 29.14346 | 29.1866  | P61514;A0A1D5RL86                 | P61514;A0A1D5RL86      | 60S ribosomal protein L37a;60S ribosomal p     | Rpl37a         |
| 27.24445 | 27.24445 | 27.42342 | P61971                            | P61971                 | Nuclear transport factor 2                     | Nutf2          |
| 24.71293 | 24.76951 | 24.31008 | P62317                            | P62317                 | Small nuclear ribonucleoprotein Sm D2          | Snrpd2         |
| 28.75812 | 28.77392 | 28.83244 | P62774;A0A0J9YV46                 | P62774                 | Myotrophin                                     | Mtpn           |
| 29.41538 | 29.509   | 29.38895 | P62849;A0A286YEB7                 | P62849;A0A286YEB7      | 40S ribosomal protein S24                      | Rps24          |
| 30.27586 | 30.28692 | 30.21928 | P62855                            | P62855                 | 40S ribosomal protein S26                      | Rps26          |
| 25.98468 | 25.78457 | 24.26785 | P62869;A6PWE0                     | P62869                 | Elongin-B                                      | Elob           |
| 26.95394 | 27.391   | 27.56092 | P67871;G3UXG7;G3UXU2;G3UZJ5;G3UZ  | P67871;G3UXG7;G3UXU2   | Casein kinase II subunit beta;Casein kinase II | Csnk2b         |
| 25.59263 | 25.34773 | 25.39428 | P70122;D6REV5;F6TNO3              | P70122                 | Ribosome maturation protein SBDS               | Sbds           |
| 23.94056 | 23.417   | 24.08537 | P70441                            | P70441                 | Na(+)/(H+) exchange regulatory cofactor NH     | Slc9a3r1       |
| 28.3452  | 27.87994 | 27.52402 | P84084;D3YV25;E9Q2C2              | P84084                 | ADP-ribosylation factor 5                      | Arf5           |
| NaN      | 22.90976 | NaN      | Q00915                            | Q00915                 | Retinol-binding protein 1                      | Rbp1           |
| 25.23535 | 25.02749 | 24.95394 | Q03350                            | Q03350                 | Thrombospondin-2                               | Thbs2          |
| 25.82639 | 25.74919 | 25.81421 | Q07417                            | Q07417                 | Short-chain specific acyl-CoA dehydrogenase    | Acads          |
| 25.19835 | 26.20396 | 25.89735 | Q3TEW6;A0A0A6YWA2;A0A0A6YXX8;A0   | Q3TEW6;A0A0A6YWA2      | Myelin protein zero-like protein 1;Myelin pr   | Mpz1           |
| 24.26785 | 23.76951 | 24.09346 | Q3TKX1;Q9R1Q9;B7FAU3;B7FAU7;F6XS  | Q3TKX1;Q9R1Q9;B7FAU3   | ATPase, H+ transporting, lysosomal accessor    | Atp6ap1        |
| 25.24264 | NaN      | NaN      | Q3U0V1                            | Q3U0V1                 | Far upstream element-binding protein 2         | Khsrp          |
| 25.01052 | 25.239   | 25.89504 | Q3U816;Q9Z2G9                     | Q3U816;Q9Z2G9          | Oxidoreductase HTATIP2                         | Htatipt2       |
| 23.94056 | 24.45513 | 24.67034 | Q3UA06;A0A1Y7VLR4                 | Q3UA06                 | Pachytene checkpoint protein 2 homolog         | Trip13         |
| 27.71293 | 27.51653 | 27.5389  | Q3UMR5                            | Q3UMR5                 | Calcium uniporter protein, mitochondrial       | Mcu            |
| 26.2856  | 26.26964 | 26.30835 | Q3UN02;BOV2Q9                     | Q3UN02                 | Lysocardiolipin acyltransferase 1              | Lclat1         |
| 25.18329 | NaN      | 23.96719 | Q3UVG3                            | Q3UVG3                 | Protein FAM91A1                                | Fam91a1        |
| 24.10949 | 24.1795  | 25.06497 | Q3UW66;Q99199                     | Q3UW66;Q99199          | Sulfurtransferase;3-mercaptopyruvate sulfu     | Mpst           |
| 28.01903 | 28.21697 | 28.4512  | Q61990;E9Q7D8;P57722;A0A087WR61   | Q61990;E9Q7D8;P57722   | Poly(rC)-binding protein 2;Poly(rC)-binding p  | Pcbp2;Pcbp3    |
| 26.99766 | 27.47846 | 27.29789 | Q62159;H3BL56;A0A0G2JEP8          | Q62159;H3BL56;A0A0G2J  | Rho-related GTP-binding protein RhoC           | Rhoc           |
| 26.21141 | 26.37782 | 26.67303 | Q62348                            | Q62348                 | Translin                                       | Tsn            |
| 25.94726 | 26.20955 | 26.18518 | Q62446;A0A1Y7VLK0;A0A1Y7VMJ9;A0   | Q62446;A0A1Y7VLK0      | Peptidyl-prolyl cis-trans isomerase FKBP3;Pe   | Fkbp3          |
| 25.37782 | 26.05879 | 25.7415  | Q6PA06;E9QND8                     | Q6PA06;E9QND8          | Atlastin-2                                     | Atl2           |
| 25.81909 | 25.67034 | 25.82396 | Q6PD26                            | Q6PD26                 | GPI transamidase component PIG-S               | Pigs           |
| 24.76446 | 24.7543  | 24.71816 | Q6PGL7;A0A0N4SUJ0;A0A0N4SV74      | Q6PGL7;A0A0N4SUJ0;A0A  | WASH complex subunit 2;WASH complex su         | Washc2         |
| 24.08537 | 24.98902 | 24.77455 | Q6ZPU9;H3BIY2;E0CXJ9;E0CXN7       | Q6ZPU9                 | KIF1-binding protein                           | Kif1bp         |
| 28.88577 | 28.99226 | 29.02697 | Q6ZVW7;G3UWD7                     | Q6ZVW7                 | 60S ribosomal protein L35                      | Rpl35          |
| 25.32389 | 24.86703 | 25.2021  | Q78HU3                            | Q78HU3                 | Multivesicular body subunit 12A                | Mvb12a         |

|          |          |          |                                   |                       |                                                |              |
|----------|----------|----------|-----------------------------------|-----------------------|------------------------------------------------|--------------|
| 25.72338 | 25.4008  | 25.82153 | Q80U72;Q80VQ1                     | Q80U72                | Protein scribble homolog                       | Scrib        |
| NaN      | 24.1488  | NaN      | Q80W65                            | Q80W65                | Proprotein convertase subtilisin/kexin type 9  | Pcsk9        |
| 22.64966 | 23.94949 | 24.37119 | Q8BGK6;A0A1D5RMA4;A0A1D5RMI7;A    | Q8BGK6;A0A1D5RMA4;A0  | Y+L amino acid transporter 2                   | Slc7a6       |
| 25.77706 | 25.61526 | 25.61526 | Q8BH43;B1AUN0;Q8R5H6              | Q8BH43;B1AUN0         | Wiskott-Aldrich syndrome protein family me     | Wasf2        |
| 26.42342 | 26.57542 | 26.26069 | Q8BH80;Q9QY76                     | Q8BH80;Q9QY76         | Vesicle-associated membrane protein, assoc     | Vabp         |
| 26.09346 | 25.49228 | 25.45826 | Q8BIJ6;E9PWN3;E9PWN2              | Q8BIJ6                | Isoleucine-tRNA ligase, mitochondrial          | Iars2        |
| 26.80193 | 26.93157 | 26.73892 | Q8BMJ3;Q60872;Q3UTA4;Q3TQZ4;J3Q   | Q8BMJ3;Q60872         | Eukaryotic translation initiation factor 1A, X | Eif1ax;Eif1a |
| 25.94949 | 26.61807 | 26.89735 | Q8BR63                            | Q8BR63                | Protein FAM177A1                               | Fam177a1     |
| 26.33756 | 25.92705 | 26.44253 | Q8BYH7;I6L974;A0A140LIS2;A0A140LH | Q8BYH7;I6L974         | TBC1 domain family member 17                   | Tbc1d17      |
| 25.64306 | 25.74407 | 26.01478 | Q8C145;D3Z7N4                     | Q8C145                | Zinc transporter ZIP6                          | Slc39a6      |
| 24.75939 | 24.59833 | 24.89041 | Q8C9V5;Q8BGK0;Q61941;E9Q8F4       | Q8C9V5;Q8BGK0;Q61941  | NAD(P) transhydrogenase, mitochondrial         | Nnt          |
| 25.98251 | 25.73635 | 25.7543  | Q8CAS9;H7BWY5                     | Q8CAS9;H7BWY5         | Poly [ADP-ribose] polymerase 9                 | Parp9        |
| 25.46762 | 24.98468 | 25.94726 | Q8CBY8                            | Q8CBY8                | Dynactin subunit 4                             | Dctn4        |
| 23.65403 | 23.85757 | 23.391   | Q8CG50;D3Z444;Q91Z34              | Q8CG50;D3Z444;Q91Z34  | Ras-related protein Rab-43;RIKEN cDNA 181      | Rab43        |
| 23.79947 | 23.72858 | 23.21104 | Q8CIH5                            | Q8CIH5                | 1-phosphatidylinositol 4,5-bisphosphate phd    | Plcg2        |
| 26.22435 | 26.08537 | 25.96719 | Q8JZU2;F6VVY4                     | Q8JZU2                | Tricarboxylate transport protein, mitochon     | Slc25a1      |
| 25.73892 | 26.16615 | 26.00838 | Q8K094                            | Q8K094                | Poliovirus receptor                            | Pvr          |
| 25.20583 | 25.1332  | 25.60399 | Q8K2J7                            | Q8K2J7                | REL1-like protein 1                            | Rell1        |
| NaN      | 22.16116 | NaN      | Q8K2Y3                            | Q8K2Y3                | Protein eva-1 homolog B                        | Eva1b        |
| 25.98685 | 25.85519 | 25.51352 | Q8QZY6                            | Q8QZY6                | Tetraspanin-14                                 | Tspan14      |
| 28.72273 | 28.6764  | 28.78644 | Q8R2Q8                            | Q8R2Q8                | Bone marrow stromal antigen 2                  | Bst2         |
| 27.11148 | 27.58262 | 28.01372 | Q8R2Y8                            | Q8R2Y8                | Peptidyl-tRNA hydrolase 2, mitochondrial       | Pthr2        |
| 25.84805 | 25.88577 | 25.77455 | Q8R4W6                            | Q8R4W6                | Procollagen C-endopeptidase enhancer 2         | Pcolce2      |
| 24.53445 | 24.30313 | 24.32389 | Q8R502                            | Q8R502                | Volume-regulated anion channel subunit LR      | Lrrc8c       |
| 24.90885 | 25.12139 | 25.417   | Q8R574                            | Q8R574                | Phosphoribosyl pyrophosphate synthase-ass      | Prpsap2      |
| 24.55801 | 24.71293 | 24.10949 | Q8R5F7                            | Q8R5F7                | Interferon-induced helicase C domain-conta     | Ifih1        |
| 25.09748 | 24.79452 | 25.66221 | Q8R5H1                            | Q8R5H1                | Ubiquitin carboxyl-terminal hydrolase 15       | Usp15        |
| 27.51653 | 27.71947 | 27.43141 | Q8R5J9                            | Q8R5J9                | PRA1 family protein 3                          | Arl6ip5      |
| 26.99766 | 27.01903 | 26.83846 | Q8R5L1;O35658                     | Q8R5L1;O35658         | Complement component 1 Q subcomponent          | C1qb         |
| 26.26428 | 25.77455 | 26.35616 | Q8VCN5                            | Q8VCN5                | Cystathionine gamma-lyase                      | Cth          |
| 25.30313 | 25.09346 | 25.24989 | Q8VEH6                            | Q8VEH6                | COBW domain-containing protein 1               | Cbwd1        |
| 25.50142 | 25.88809 | 25.94726 | Q91VH6                            | Q91VH6                | Protein MEMO1                                  | Memo1        |
| 25.50142 | 25.92025 | 25.74663 | Q91WS0                            | Q91WS0                | CDGSH iron-sulfur domain-containing protei     | Cis1         |
| 23.35111 | NaN      | NaN      | Q91XU3                            | Q91XU3                | Phosphatidylinositol 5-phosphate 4-kinase t    | Pip4k2c      |
| 25.67842 | 25.36786 | 24.94503 | Q91YJ2                            | Q91YJ2                | Sorting nexin-4                                | Snx4         |
| 24.49838 | 24.78457 | 24.21697 | Q91YR9                            | Q91YR9                | Prostaglandin reductase 1                      | Ptgr1        |
| 25.26069 | 25.77957 | 25.44884 | Q91YS7;Q63932;M0QWN2;D3Z446;A0    | Q91YS7;Q63932;M0QWN   | Dual-specificity mitogen-activated protein ki  | Map2k2       |
| 25.49228 | 25.5285  | 25.65403 | Q91YW3                            | Q91YW3                | DnaJ homolog subfamily C member 3              | Dnajc3       |
| 25.67842 | 25.68646 | 25.60116 | Q91ZR1;P56371                     | Q91ZR1                | Ras-related protein Rab-4B                     | Rab4b        |
| 25.49534 | 25.62645 | 25.42342 | Q922Q4;Q922W5;A2ABZ2              | Q922Q4                | Pyrraline-5-carboxylate reductase 2            | Pycr2        |
| 25.64581 | 25.56964 | 25.90426 | Q923T9;A0A286YCW8;A0A286YCH4;A0   | Q923T9                | Calcium/calmodulin-dependent protein kina      | Camk2g       |
| 26.96499 | 27.1795  | 26.77706 | Q924Z4;D3YTM0;D3Z0Z2;D3Z4M2       | Q924Z4;D3YTM0;D3Z0Z2; | Ceramide synthase 2;Ceramide synthase 2        | Cers2        |
| 25.04843 | 24.87173 | 24.05258 | Q99KN2;G3UYN9;G3UYR5;G3UYSA       | Q99KN2;G3UYN9;G3UYR5  | Probable cytosolic iron-sulfur protein assem   | Cia1         |
| 23.65403 | 23.85757 | 23.91342 | Q99KW9                            | Q99KW9                | T-cell immunomodulatory protein                | Iftg1        |
| 26.01478 | 25.91114 | 26.16806 | Q99LR1;D6RFU2;F7BHM8              | Q99LR1;D6RFU2         | Monoacylglycerol lipase ABHD12                 | Abhd12       |
| 23.71816 | 23.37782 | 23.91342 | Q99M31                            | Q99M31                | Heat shock 70 kDa protein 14                   | Hspa14       |
| 26.75175 | 26.86231 | 26.87408 | Q9CQ22;A0A0A6YX02                 | Q9CQ22                | Regulator complex protein LAMTOR1              | Lamtor1      |
| 25.61807 | 25.62087 | 26.13124 | Q9CQ80;A8XY17;E9PXS9;A2A4K0;A2A4  | Q9CQ80;A8XY17;E9PXS9; | Vacuolar protein-sorting-associated protein    | Vps25        |
| NaN      | NaN      | 24.33074 | Q9CQB4;Q9D855                     | Q9CQB4;Q9D855         | Cytochrome b-c1 complex subunit 7              | Uqcrb        |
| 27.89735 | 27.85043 | 27.78332 | Q9CQR2                            | Q9CQR2                | 40S ribosomal protein S21                      | Rps21        |
| 25.50446 | 25.2571  | 25.04009 | Q9CQW1                            | Q9CQW1                | Synaptobrevin homolog YKT6                     | Ykt6         |
| 29.20769 | 29.2535  | 29.08891 | Q9CQW9                            | Q9CQW9                | Interferon-induced transmembrane protein       | Ifitm3       |
| 26.55508 | 26.83846 | 26.80193 | Q9CR51                            | Q9CR51                | V-type proton ATPase subunit G 1               | Atp6v1g1     |
| 27.09144 | 27.18896 | 27.35783 | Q9CR68                            | Q9CR68                | Cytochrome b-c1 complex subunit Rieske, m      | Uqcrcf1      |
| 25.39754 | 25.4008  | 25.77957 | Q9CXE7;E9PXY3;D3Z615;Q8C5H9;Q3V4  | Q9CXE7;E9PXY3         | Transmembrane emp24 domain-containing          | Tmed5        |
| 25.33074 | 25.2571  | 25.78457 | Q9CZR8;Q9CX33                     | Q9CZR8                | Elongation factor Ts, mitochondrial            | Tsfm         |
| 23.99335 | 23.50446 | 23.62087 | Q9CZV8;A2A536;A2A533;A2A550;Q8BH  | Q9CZV8                | F-box/LRR-repeat protein 20                    | Fbxl20       |
| 27.83244 | 27.12139 | 27.3662  | Q9D1G1                            | Q9D1G1                | Ras-related protein Rab-1B                     | Rab1b        |
| 25.51051 | 25.95172 | 25.67573 | Q9D1M0                            | Q9D1M0                | Protein SEC13 homolog                          | Sec13        |
| 26.71293 | 27.04009 | 26.77706 | Q9D1M7                            | Q9D1M7                | Peptidyl-prolyl cis-trans isomerase FKBP11     | Fkbp11       |
| 26.01691 | 26.16039 | 26.30661 | Q9D898                            | Q9D898                | Actin-related protein 2/3 complex subunit 5    | Arpc5l       |
| 28.0296  | 28.33245 | 28.41941 | Q9DBR7;A0A1W2P750                 | Q9DBR7                | Protein phosphatase 1 regulatory subunit 12    | Ppp1r12a     |
| 25.77706 | 25.52552 | 25.67034 | Q9DC61;A2AIW9                     | Q9DC61;A2AIW9         | Mitochondrial-processing peptidase subunit     | Pmpca        |
| 27.71947 | 27.27142 | 27.34096 | Q9DCT8;A0A0G2JF37                 | Q9DCT8                | Cysteine-rich protein 2                        | Crip2        |
| 24.72858 | 25.11347 | 25.18707 | Q9DCW2;D3Z7J3                     | Q9DCW2;D3Z7J3         | Phospholipid scramblase 2;Phospholipid scr     | Plscr2       |
| 23.28207 | NaN      | NaN      | Q9EPR4;A2ANL1                     | Q9EPR4                | Solute carrier family 23 member 2              | Slc23a2      |
| 25.83846 | 25.45199 | 25.90196 | Q9EQ80;D3Z0G0;E9PWJ6              | Q9EQ80;D3Z0G0         | NIF3-like protein 1                            | Nif3l1       |
| 28.34942 | 28.53519 | 29.24898 | Q9EQC5                            | Q9EQC5                | N-terminal kinase-like protein                 | Scyl1        |
| 24.78955 | 24.8044  | 24.74919 | Q9JHK4                            | Q9JHK4                | Geranylgeranyl transferase type-2 subunit a    | Rabgga       |
| NaN      | NaN      | 22.44253 | Q9JHW2                            | Q9JHW2                | Omega-amidase NIT2                             | Nit2         |
| 25.82881 | 25.73892 | 26.51202 | Q9JK38                            | Q9JK38                | Glucosamine 6-phosphate N-acetyltransfera      | Gnpnat1      |
| 25.29614 | 25.41054 | 24.77957 | Q9JKB3                            | Q9JKB3                | Y-box-binding protein 3                        | Ybx3         |
| NaN      | 23.54038 | NaN      | Q9JLN9                            | Q9JLN9                | Serine/threonine-protein kinase mTOR           | Mtor         |
| 24.85281 | 24.48616 | 24.54038 | Q9QZN4;A2A7H1;Z4YN00;A2A7G9       | Q9QZN4;A2A7H1;Z4YN00  | F-box only protein 6;F-box only protein 6 (Fr  | Fbxo6        |
| 24.37119 | 24.46139 | 25.01052 | Q9R059;F2Z455                     | Q9R059;F2Z455         | Four and a half LIM domains protein 3          | Fhl3         |
| NaN      | NaN      | NaN      | Q9R061                            | Q9R061                | Cytosolic Fe-S cluster assembly factor NUBP2   | Nubp2        |
| 25.6513  | 25.43936 | 25.52253 | Q9WUL7                            | Q9WUL7                | ADP-ribosylation factor-like protein 3         | Arl3         |
| NaN      | NaN      | NaN      | Q9Z0J7                            | Q9Z0J7                | Growth/differentiation factor 15               | Gdf15        |
| 25.67034 | 25.66221 | 25.36453 | Q9Z0L0                            | Q9Z0L0                | Trophoblast glycoprotein                       | Tpbp         |
| 25.97158 | 25.94503 | 26.31181 | A0A087WNP6;Q4VAA2;A0A087WRM0      | A0A087WNP6;Q4VAA2     | Protein CDV3                                   | Cdv3         |
| 23.98468 | 25.239   | 24.68646 | A0A087WQ01;Q69Z38                 | A0A087WQ01;Q69Z38     | Pseudopodium-enriched atypical kinase 1        | Peak1        |
| 26.12534 | 26.00838 | 25.98685 | A0A087WSP7;A0A087WQZ1;Q8K310      | A0A087WSP7;A0A087WQ   | MCG121979, isoform CRA_a;Matrin-3              | Matr3        |
| 23.68646 | 23.64306 | 24.08537 | A0A0A0MQA5;P68368;A0A087WQS4;A    | A0A0A0MQA5;P68368     | Tubulin alpha chain (Fragment);Tubulin alph    | Tuba4a       |
| 24.63755 | 24.63755 | 24.95837 | A0A0A0MQM7;O08746                 | A0A0A0MQM7;O08746     | Matrilin-2                                     | Matn2        |
| 24.26069 | 24.1946  | 24.35783 | A0A0A6YXE3;A0A0A6YWB0;G3X9Q0;A0   | A0A0A6YXE3;A0A0A6YWB  | Muscleblind-like protein 1                     | Mbln1        |
| NaN      | NaN      | NaN      | A0A0F6AIX5;A0A1W2P7C8;Q8BVA5;A0   | A0A0F6AIX5;A0A1W2P7C  | Lipid droplet-associated hydrolase             | Ldah         |
| 23.76951 | 24.7543  | 24.1946  | A0A0G2JEK2;P63254                 | A0A0G2JEK2;P63254     | Cysteine-rich protein 1                        | Crip1        |
|          |          |          | A0A0G2JFP4;Q8K385                 | A0A0G2JFP4;Q8K385     | Ferric-chelate reductase 1                     | Frrs1;FRRS1  |

|          |          |          |                                   |                         |                                                |              |
|----------|----------|----------|-----------------------------------|-------------------------|------------------------------------------------|--------------|
| 27.49381 | 27.73892 | 27.62506 | A0A0G2JFY0;A0A0A0MQ8;Q3UMC0;D     | A0A0G2JFY0;A0A0A0MQ8    | Spermatogenesis-associated protein 5           | Spata5       |
| 23.58692 | 22.84038 | 22.50688 | A0A0G2JGL8;Q99PU8                 | A0A0G2JGL8;Q99PU8       | Putative ATP-dependent RNA helicase DHX3       | Dhx30        |
| 25.03591 | 24.92705 | 25.07316 | A0A0N4SV56                        | A0A0N4SV56              | Cellular nucleic acid-binding protein          | Cnbp         |
| 24.81909 | 25.39754 | 25.37782 | A0A0R4J049;S4R295;F6QQQ6          | A0A0R4J049              | Protein arginine N-methyltransferase 5         | Prrt5        |
| 24.40406 | 24.73376 | 24.31008 | A0A0R4J138;P50429                 | A0A0R4J138;P50429       | Arylsulfatase B                                | Arsb         |
| 24.87173 | 24.75939 | 24.94503 | A0A0U1RNT6;A0A0U1RNK6;Q3THS6;A0   | A0A0U1RNT6;A0A0U1RNN    | S-adenosylmethionine synthase                  | Mat2a        |
| 25.239   | 25.63201 | 25.47073 | A0A140LIT2;O88455;D3Z7G1;A0A140LI | A0A140LIT2;O88455;D3Z7  | 7-dehydrocholesterol reductase;7-dehydro       | Dhcr7        |
| 23.68646 | NaN      | 23.44253 | A0A1B0GRR8;Q62376;A0A1B0GR69;A0   | A0A1B0GRR8;Q62376;A0A   | U1 small nuclear ribonucleoprotein 70 kDa      | Snrnp70      |
| 26.34942 | 26.33756 | 26.47228 | A0A1B0GS13;A0A1B0GT81;A0A1B0GTA   | A0A1B0GS13;A0A1B0GT8    | Apoptosis regulator BAX (Fragment);Apopto      | Bax          |
| 24.20955 | 24.56964 | 23.74919 | A0A1L1SRX2;O08739                 | A0A1L1SRX2;O08739       | AMP deaminase;AMP deaminase 3                  | Ampd3        |
| 24.95837 | 24.80931 | 25.17188 | A0A1L1SU22;Q9D1P4;A0A1L1STQ1;A0   | A0A1L1SU22;Q9D1P4;A0    | Cysteine and histidine-rich domain-containin   | Chordc1      |
| 25.47383 | 25.47073 | 25.93382 | A0A1Y7VN19;Q9CXR1                 | A0A1Y7VN19;Q9CXR1       | Dehydrogenase/reductase SDR family mem         | Dhrs7        |
| NaN      | 23.91342 | 23.78955 | A0A286YCV0;D3YV00;P98195;A0A286Y  | A0A286YCV0;D3YV00;P98   | Phospholipid-transporting ATPase               | Atp9b        |
| 23.59833 | 23.66492 | 23.94056 | A0A286YD87;Q01721                 | A0A286YD87;Q01721       | Growth arrest-specific protein 1               | Gas1         |
| 24.52253 | 24.56384 | 23.89504 | A0A286YDB8;Q9CZX0                 | A0A286YDB8;Q9CZX0       | Elongator complex protein 3                    | Elp3         |
| 24.36453 | 24.417   | 24.45513 | A0A286YD18;G3X972;A0A286YD08      | A0A286YD18;G3X972       | Sec24 related gene family, member C (S. cer    | Sec24c       |
| 25.52253 | 25.7024  | 24.78955 | A0A286YED2;P53690                 | A0A286YED2;P53690       | Matrix metalloproteinase;Matrix metallopro     | Mmp14        |
| 24.44253 | 24.81909 | 24.57542 | A2A7A7;Q8CFX1;A2A7A8              | A2A7A7;Q8CFX1           | GDH/6PGL endoplasmic bifunctional protein      | H6pd         |
| 24.97596 | 24.89504 | 24.58692 | A2AJH3;O70311;F7APP3              | A2AJH3;O70311;F7APP3    | Glycylpeptide N-tetradecanoyltransferase;G     | Nmt2         |
| 25.07725 | 25.68378 | 25.47692 | A2ASL8;Q7TQ95;A2ASMO;A2ASM1       | A2ASL8;Q7TQ95;A2ASMO    | Endoplasmic reticulum junction formation p     | Lnkp         |
| 23.94949 | 24.08537 | 23.6971  | A2AU61;A2AU62;Q64012;A2AU60       | A2AU61;A2AU62;Q64012    | RNA-binding protein Raly (Fragment);RNA-b      | Raly;Ra      |
| 24.317   | NaN      | NaN      | A2AW19;A2AW17;Q8R3V5              | A2AW19;A2AW17;Q8R3V5    | Endophilin-B2                                  | Sh3glb2      |
| NaN      | NaN      | NaN      | B1B1E3;Q8VDV0                     | B1B1E3;Q8VDV0           | Integrin beta-like protein 1 (Fragment);Integ  | Itgbl1       |
| 24.90426 | 24.98468 | 25.03171 | B2RQS1;Q9ERG2                     | B2RQS1;Q9ERG2           | Striatin-3                                     | Strn3        |
| 27.0296  | 27.47073 | 26.22066 | B2RXC1                            | B2RXC1                  | Trafficking protein particle complex subunit   | Trappc11     |
| 30.29789 | 30.18423 | 30.28692 | D3Y7Q9;P62843                     | D3Y7Q9;P62843           | 40S ribosomal protein S15                      | Rps15        |
| 25.59263 | 25.67842 | 25.68913 | D3YWK1;Q80W47                     | D3YWK1;Q80W47           | WD repeat domain phosphoinositide-intera       | Wip2         |
| 25.50749 | 25.69445 | 25.26069 | D3Z0B9;A0A1B0GSU0;Q57119;A0A1B0G  | D3Z0B9;A0A1B0GSU0;Q5    | Aldehyde dehydrogenase family 16 member        | Aldh16a1     |
| 25.80686 | 25.72338 | 26.13712 | D3Z783;P31750;D3YXX3;D3YYP9       | D3Z783;P31750;D3YXX3    | RAC-alpha serine/threonine-protein kinase      | Akt1         |
| 25.2535  | 24.97158 | 24.84805 | E9PUB7;D3YX87;Q2YDW2              | E9PUB7;D3YX87;Q2YDW2    | Protein misato homolog 1                       | Msto1        |
| 24.2535  | 24.53445 | 24.51051 | E9PUQ9;F7AC58;E2JF22;F6PYU5;F6QY9 | E9PUQ9;F7AC58;E2JF22;F  | Piezo-type mechanosensitive ion channel co     | Piezo1       |
| 23.6971  | 23.67573 | 23.48001 | E9PXV7;E9PV41;O08808;F6XC54;D3Z07 | E9PXV7;E9PV41;O08808;F  | Protein diaphanous homolog 1                   | Diaph1       |
| 24.90426 | 25.2856  | 24.10949 | E9PYX7;E9Q852;E9Q9C3;Q9QZQ1       | E9PYX7;E9Q852;E9Q9C3;Q  | Afdin                                          | Afdin        |
| NaN      | 24.90426 | NaN      | E9Q0X4;Q8BLX7                     | E9Q0X4;Q8BLX7           | Collagen alpha-1(XVI) chain                    | Col16a1      |
| 24.69179 | 24.78955 | 24.79452 | E9Q6U4;Q3UWL8;E9Q4Q8;E9Q8R1;Q6    | E9Q6U4;Q3UWL8           | Prefoldin subunit 4                            | Pfdn4        |
| 25.22066 | 25.60964 | 25.58692 | E9Q855;Q3UXS0;O35609              | E9Q855;Q3UXS0;O35609    | Secretory carrier-associated membrane prot     | Scamp3       |
| 23.80931 | 23.70767 | 24.18707 | E9Q9G8;Q6NWW3                     | E9Q9G8;Q6NWW3           | Intraflagellar transport protein 122 homolog   | Ift122       |
| NaN      | NaN      | NaN      | E9QAM4;Q9Z184                     | E9QAM4;Q9Z184           | Protein-arginine diesterase type-3             | Pad3i        |
| 25.50142 | 25.45199 | 25.64856 | E9QAY5;A2RSX9;E9Q3G5;G5E8V9       | E9QAY5;A2RSX9;E9Q3G5;   | Predicted gene, 37240;ADP-ribosylation fact    | Gm37240;Arfp |
| 23.88577 | 23.49228 | 23.35111 | E9QN99;Q8VCR7;A0A087WP24;A0A087   | E9QN99;Q8VCR7;A0A087    | Protein ABHD14B;Protein ABHD14B (Fragme        | Abhd14b      |
| 23.62087 | 23.54038 | NaN      | F6TLV3;Q8BX90;EOCXY0              | F6TLV3;Q8BX90           | Fibronectin type-III domain-containing prote   | Fndc3a       |
| 24.41054 | 24.34435 | 24.35111 | F6UHR6;E9PXZ2;A0A0A6YXH3;A2A8Z1;F | F6UHR6;E9PXZ2;A0A0A6Y   | Oxysterol-binding protein                      | Osbpl9       |
| NaN      | 23.33756 | NaN      | F7BPW6;E9QAT4;A2AIX1              | F7BPW6;E9QAT4;A2AIX1    | Protein transport protein sec16 (Fragment);    | Sec16a       |
| 25.67303 | 25.09346 | 25.62366 | F7CDT0;F6WMC0;P61082;G5E919       | F7CDT0;F6WMC0;P61082    | NEDD8-conjugating enzyme Ubc12 (Fragme         | Ube2m        |
| 24.83846 | 24.82881 | 24.96279 | F8VQL0;P16056;D3YVY2;F6X333       | F8VQL0;P16056           | Hepatocyte growth factor receptor              | Met          |
| 25.29614 | 25.2535  | 24.01052 | F8WIE5;Q69ZR2                     | F8WIE5;Q69ZR2           | E3 ubiquitin-protein ligase HECTD1             | Hectd1       |
| 24.60399 | 25.50749 | 25.18329 | H3BJJ6;H3BJD1;Q3TI69;H3BJQ3;H3BKE | H3BJJ6;H3BJD1;Q3TI69;H3 | DNA dC->dU-editing enzyme APOBEC-3 (Fra        | Apobec3      |
| 24.04427 | 24.42342 | 24.56964 | J3QQ30;J3QPW1;P53810;F8WGG5       | J3QQ30;J3QPW1;P53810;   | Phosphatidylinositol transfer protein alpha    | Pitpna       |
| 24.74919 | 24.85757 | 24.2021  | O08915;D3YW40                     | O08915;D3YW40           | AH receptor-interacting protein;AH receptor    | Aip          |
| 22.63423 | 22.94771 | 22.64306 | O35075                            | O35075                  | Down syndrome critical region protein 3 hor    | Dscr3        |
| 25.45513 | 25.72598 | 25.78706 | O35188;A0A1D5RMK8                 | O35188                  | Fractalkine                                    | Cx3cl1       |
| NaN      | NaN      | NaN      | O35640;Q921D0                     | O35640;Q921D0           | D-dopachrome decarboxylase;Predicted gen       | Ddt;Gm20441  |
| 24.60964 | NaN      | 24.11744 | O35857                            | O35857                  | Annexin A8;Annexin                             | Anxa8        |
| 26.61807 | 26.71293 | 26.69975 | O35955                            | O35955                  | Mitochondrial import inner membrane tran       | Timm44       |
| 26.16231 | 26.11347 | 25.87173 | O35988                            | O35988                  | Proteasome subunit beta type-10                | Psbm10       |
| 26.85043 | 26.87408 | 26.92025 | O54692                            | O54692                  | Syndecan-4                                     | Sdc4         |
| 24.82252 | 24.88577 | 24.92252 | O55135;A6PWZ2;D6RG53;D6RJJ3;B1AZ  | O55135;A6PWZ2           | Centromere/kinetochore protein zw10 hom        | Zw10         |
| 29.30226 | 29.03223 | 29.31743 | O70378;M0QWY0;M0QWP2              | O70378;M0QWY0;M0QWP2    | Eukaryotic translation initiation factor 6;Euk | Eif6         |
| 24.78457 | 24.71816 | 24.63201 | O70456                            | O70456                  | ER membrane protein complex subunit 8;ER       | Emc8         |
| 27.91456 | 27.87408 | 27.90311 | O88374;O35855;A0A1B0GX27;A0A1B0   | O88374;O35855;A0A1B0G   | 14-3-3 protein sigma                           | Sfn          |
| 26.81421 | 24.24627 | 24.1795  | O88653;A0A0G2JGQ3                 | O88653;A0A0G2JGQ3       | Branched-chain-amino-acid aminotransferas      | Bcat2        |
| 24.99766 | 24.80931 | 24.82396 | O88662                            | O88662                  | Regulator complex protein LAMTOR3;Ragula       | Lamtor3      |
| 24.31008 | NaN      | NaN      | O88696                            | O88696                  | Epithelial membrane protein 2                  | Emp2         |
| 25.86703 | 26.33756 | 26.35783 | O88792                            | O88792                  | ATP-dependent Clp protease proteolytic sub     | C1pp         |
| 25.28912 | 25.48616 | 25.34435 | O88923                            | O88923                  | Junctional adhesion molecule A                 | J11r         |
| 23.94056 | 24.16423 | 23.80931 | P00375                            | P00375                  | Tripeptidyl-peptidase 1                        | Tpp1         |
| 24.97596 | 25.47073 | 25.1946  | P06795;A0A0G2JF49                 | P06795                  | Dihydrofolate reductase                        | Dhfr         |
| 25.59833 | 25.8044  | 25.75175 | P08074;F6YXN9                     | P08074;F6YXN9           | Multidrug resistance protein 1B                | Acb1b        |
| 24.52253 | 24.62645 | 24.33756 | P10518                            | P10518                  | Carbonyl reductase [NADPH] 2;Carbonyl red      | Cbr2         |
| 25.69179 | 25.37119 | 25.93607 | P11214                            | P11214                  | Delta-aminolevulinic acid dehydratase          | Alad         |
| 25.93382 | 26.01691 | 25.48616 | P12032                            | P12032                  | Tissue-type plasminogen activator              | Plat         |
| 24.91342 | 25.06907 | 24.94949 | P14576;E9PXCO;A0A1Y7VJJO          | P14576;E9PXCO           | Metalloproteinase inhibitor 1                  | Timp1        |
| 26.40243 | 26.03171 | 26.20769 | P18406                            | P18406                  | Signal recognition particle 54 kDa protein     | Srp54;Srp54b |
| 25.61246 | 25.74663 | 25.64581 | P19788                            | P19788                  | Protein CYR61                                  | Cyr61        |
| 25.38772 | 25.37782 | 25.79699 | P21278                            | P21278                  | Matrix Gla protein                             | Mgp          |
| 26.17379 | 26.1332  | 26.34604 | P22725;D3YTW9;A0A0R4J1M1;P24383;  | P22725                  | Guanine nucleotide-binding protein subunit     | Gna11        |
| 27.5389  | 27.52402 | 27.42342 | P26350;A0A087WPN9;A0A087WPN6;A0   | P26350                  | Protein Wnt-5a                                 | Wnt5a        |
| 23.31008 | 22.10789 | NaN      | P26883;F6X913                     | P26883                  | Prothymosin alpha                              | Ptma         |
| 23.88577 | 23.66492 | 23.14725 | P28352;D3Z124;F6QA74              | P28352;D3Z124;F6QA74    | Peptidyl-prolyl cis-trans isomerase FKBP1A     | Fkbp1a       |
| 26.69975 | 26.73892 | 26.80193 | P28867;Q1MX41;Q1MX43;Q1MX40;Q1    | P28867;Q1MX41;Q1MX43    | DNA-(apurinic or apyrimidinic site) lyase;DN   | Apex1        |
| 23.88577 | 23.66492 | 23.14725 | P35235                            | P35235                  | Regulator complex protein LAMTOR3;Ragula       | Lamtor3      |
| 26.3201  | 27.49381 | 27.27142 | P40237;A2AU1                      | P40237;A2AU1            | Epithelial membrane protein 2                  | Emp2         |
| NaN      | NaN      | NaN      | P41241;A0A1L1SR46;A0A1L1STA1;A0A1 | P41241;A0A1L1SR46;A0A   | ATP-dependent Clp protease proteolytic sub     | C1pp         |
| 25.77706 | 25.417   | 25.68378 | P48024;J3QNB7;A0A1L1SSA3;Q9CXU9;J | P48024;J3QNB7;A0A1L1S   | Protein kinase C delta type;Protein kinase C   | Pkcd         |
| 24.12534 | 23.99335 | 24.10149 | P50228                            | P50228                  | Tyrosine-protein phosphatase non-receptor      | Ptpn11       |
|          |          |          | P51829;A0A1B0GT56                 | P51829;A0A1B0GT56       | CD82 antigen;Tetraspanin (Fragment)            | Cd82         |
|          |          |          | P51859;EOCXA0;EOCYW7              | P51859;EOCXA0;EOCYW7    | Tyrosine-protein kinase CSK;Tyrosine-protei    | Csk          |
|          |          |          |                                   |                         | Eukaryotic translation initiation factor 1;Euk | Eif1         |
|          |          |          |                                   |                         | C-X-C motif chemokine 5                        | Cxcl5        |
|          |          |          |                                   |                         | Adenylate cyclase type 7;Adenylate cyclase     | Adcy7        |
|          |          |          |                                   |                         | Hepatoma-derived growth factor;Hepatoma        | Hdgf         |

|          |          |          |                                   |                        |                                                  |               |
|----------|----------|----------|-----------------------------------|------------------------|--------------------------------------------------|---------------|
| 24.33074 | 24.21697 | 24.35111 | P54923                            | P54923                 | ADP-ribosylarginine] hydrolase                   | Adprh         |
| 26.08942 | 25.56964 | 25.77957 | P57746                            | P57746                 | V-type proton ATPase subunit D                   | Atp6v1d       |
| 24.85281 | 24.83846 | 24.05258 | P58389;B7ZDE0;A2AWF0;A2AWE9;F6Z   | P58389;B7ZDE0;A2AWF0;  | Serine/threonine-protein phosphatase 2A          | Ptpa          |
| 26.78955 | 26.54481 | 26.67303 | P61021                            | P61021                 | Ras-related protein Rab-5B                       | Rab5b         |
| 27.18896 | 27.34096 | 27.26249 | P61750;E9Q798;F6UFB9              | P61750;E9Q798          | ADP-ribosylation factor 4                        | Arf4          |
| 26.45199 | 26.4567  | 26.47537 | P62320;A0A1W2P7K5                 | P62320;A0A1W2P7K5      | Small nuclear ribonucleoprotein Sm D3;Sm         | Snrpd3        |
| 27.18896 | 27.1795  | 27.2535  | P62627;A2AVR9                     | P62627;A2AVR9          | Dynein light chain roadblock-type 1;Dynein       | Dynlrb1       |
| 25.15267 | 25.43619 | 25.14492 | P70202                            | P70202                 | Latexin                                          | Lxn           |
| 25.74919 | 25.07316 | 25.78207 | P70303                            | P70303                 | CTP synthase 2                                   | Ctps2         |
| 25.48001 | 25.04009 | 24.93157 | P70444                            | P70444                 | BH3-interacting domain death agonist             | Bid           |
| 28.21234 | 28.20303 | 28.18896 | P83882;A0A0A6YW33                 | P83882;A0A0A6YW33      | 60S ribosomal protein L36a;MCG18090              | Rpl36a;Gm6525 |
| NaN      | 22.52133 | 23.37782 | P97742                            | P97742                 | Carnitine O-palmitoyltransferase 1, liver iso    | Cpt1a         |
| NaN      | NaN      | NaN      | P97821;D3Z220                     | P97821                 | Dipeptidyl peptidase 1                           | Ctsc          |
| 24.67573 | 25.06907 | 24.90885 | P97855                            | P97855                 | Ras GTPase-activating protein-binding prote      | G3bp1         |
| NaN      | 23.88577 | 23.96719 | Q03963                            | Q03963                 | Interferon-induced, double-stranded RNA-a        | Eif2ak2       |
| NaN      | 25.17188 | 24.28207 | Q04447                            | Q04447                 | Creatine kinase B-type                           | Ckb           |
| 26.60399 | 26.68646 | 26.41054 | Q06185;Q8BTB6                     | Q06185                 | ATP synthase subunit e, mitochondrial            | Atp5i         |
| 23.63201 | 24.04427 | 24.43619 | Q0KL02                            | Q0KL02                 | Triple functional domain protein                 | Trio          |
| 25.78955 | 26.21141 | 26.42021 | Q31125                            | Q31125                 | Zinc transporter SLC39A7                         | Slc39a7       |
| 24.26785 | 23.79947 | 24.10949 | Q3TCH7;E9PXT5;J3QJX0;E9PXY1;A2A43 | Q3TCH7;E9PXT5;J3QJX0;E | Cullin-4A;Cullin-4B                              | Cul4a;Cul4b   |
| 22.44758 | 23.08699 | NaN      | Q3TET1;Q3UI47;B1AQZ2;P28741;F6V62 | Q3TET1;Q3UI47;B1AQZ2;P | Kinesin-like protein                             | Kif3a         |
| 27.43936 | 27.16039 | 26.93157 | Q3THW5;P0C056;Q8R029;Q3UA95;G3U   | Q3THW5;P0C056;Q8R029   | Histone H2A.V;Histone H2A.Z;Histone H2A          | H2afv;H2afz   |
| 25.63755 | 25.26069 | 25.44253 | Q3TMN1;Q3UI33;O08663;M0QW69;M0    | Q3TMN1;Q3UI33;O08663   | Methionine aminopeptidase 2                      | Metap2        |
| 24.28912 | NaN      | NaN      | Q3U741;Q501J6                     | Q3U741;Q501J6          | DEAD (Asp-Glu-Ala-Asp) box polypeptide 17        | DEAD17        |
| 24.39754 | 24.07725 | 24.391   | Q3U9G9;A0A0A6YXW3;A0A0A6YXT6;A0   | Q3U9G9;A0A0A6YXW3;A0   | Lamin-B receptor;Lamin-B receptor (Fragme        | Lbr           |
| 24.48001 | 24.06907 | 23.92252 | Q3UDC3;O88746;A0A1D5RM84;A0A1D    | Q3UDC3;O88746;A0A1D5   | Target of Myb protein 1;Target of Myb prote      | Tom1          |
| NaN      | NaN      | NaN      | Q3UIR3                            | Q3UIR3                 | E3 ubiquitin-protein ligase DTX3L                | Dtx3l         |
| 24.35783 | 24.48001 | 24.6811  | Q3UTY6                            | Q3UTY6                 | Thrombospondin type-1 domain-containing          | Thsd4         |
| NaN      | NaN      | NaN      | Q3V3R4                            | Q3V3R4                 | Integrin alpha-1                                 | Itga1         |
| 24.96719 | 24.56384 | 25.04009 | Q55WD9                            | Q55WD9                 | Pre-rRNA-processing protein TSR1 homolog         | Tsr1          |
| 25.39428 | 25.09748 | 25.72858 | Q61029;Q61033                     | Q61029;Q61033          | Lamina-associated polypeptide 2, isoforms t      | Tmpo          |
| NaN      | NaN      | 24.96279 | Q61090                            | Q61090                 | Frizzled-7                                       | Fzd7          |
| NaN      | NaN      | 23.95837 | Q62181;E9Q0Z0                     | Q62181                 | Semaphorin-3C                                    | Sema3c        |
| 25.64581 | 25.04009 | 25.57831 | Q62419;A2ALV1;Q8BXU5;A2ALV3;Q624  | Q62419                 | Endophilin-A2                                    | Sh3gl1        |
| 25.18329 | 25.75175 | 25.30313 | Q62422                            | Q62422                 | Osteoclast-stimulating factor 1                  | Ostf1         |
| 24.7543  | 24.68646 | 24.67573 | Q6IRU5;F7BHJ0                     | Q6IRU5;F7BHJ0          | Clathrin light chain B;Clathrin light chain (Fra | Cltb          |
| NaN      | NaN      | NaN      | Q6NS46                            | Q6NS46                 | Protein RRP5 homolog                             | Pdcd11        |
| 26.18329 | 25.29263 | NaN      | Q6P4T2                            | Q6P4T2                 | U5 small nuclear ribonucleoprotein 200 kDa       | Snrnp200      |
| NaN      | NaN      | NaN      | Q6P9Q4                            | Q6P9Q4                 | FH1/FH2 domain-containing protein 1              | Fhod1         |
| 24.83846 | 25.09346 | 25.24989 | Q6PAR5;E9Q0D1;F7ADT6;F7ADQ2       | Q6PAR5;E9Q0D1;F7ADT6;  | GTPase-activating protein and VP59 domain        | Gapvd1        |
| NaN      | 23.51653 | 23.36453 | Q6PB44                            | Q6PB44                 | Tyrosine-protein phosphatase non-receptor        | Ptpn23        |
| 24.53445 | 24.49838 | 25.00196 | Q6PGB6                            | Q6PGB6                 | N-alpha-acetyltransferase 50                     | Naa50         |
| 23.78955 | 24.1946  | 24.18707 | Q6PGC1                            | Q6PGC1                 | ATP-dependent RNA helicase DHX29                 | Dhx29         |
| NaN      | NaN      | NaN      | Q6W5C0                            | Q6W5C0                 | C-X-C motif chemokine 3                          | Cxcl3         |
| 24.79452 | 24.7543  | 24.95394 | Q6ZWQ5;Q3TGS7;Q3V2H3;O70493       | Q6ZWQ5;Q3TGS7;Q3V2H3   | Sorting nexin 12, isoform CRA_c;Sorting nex      | Snx12         |
| 27.13124 | 26.99766 | 27.08132 | Q6ZWY8;CON_P21752;A0A0N4SVF0      | Q6ZWY8                 | Thymosin beta-10                                 | Tmsb10        |
| 27.58978 | 27.48616 | 27.5969  | Q80SZ7;D3Z7Q3                     | Q80SZ7                 | Guanine nucleotide-binding protein G(I)/G(S      | Gng5          |
| 26.86231 | 26.73892 | 26.98685 | Q80U09                            | Q80U09                 | Membrane-associated progesterone recepto         | Pgrmc2        |
| 24.64856 | 24.42342 | 24.68646 | Q80WW9;B0R015                     | Q80WW9                 | DDRKG domain-containing protein 1                | Ddrgk1        |
| 25.84566 | 25.97596 | 26.05672 | Q80X71;D3Z191;D3Z0M2;D3Z6E0       | Q80X71;D3Z191;D3Z0M2   | Transmembrane protein 106B;Transmembran          | Tmem106b      |
| 23.56384 | 23.71816 | 24.05258 | Q80Y98;A0A1B0GSA5;A0A1B0GS27      | Q80Y98;A0A1B0GSA5;A0   | Phospholipase DDHD2                              | Dhdh2         |
| NaN      | NaN      | NaN      | Q8BJ66                            | Q8BJ66                 | Kazal-type serine protease inhibitor domain      | Kazald1       |
| 23.391   | 22.90426 | 23.12218 | Q8BJ71;A0A1D5RLQ0                 | Q8BJ71;A0A1D5RLQ0      | Nuclear pore complex protein Nup93               | Nup93         |
| 25.5285  | 25.33756 | 25.29964 | Q8BJU2;D3YXN7;A0A0J9Y54           | Q8BJU2;D3YXN7;A0A0J9Y  | Tetraspanin-9;Tetraspanin (Fragment)             | Tspan9        |
| 25.29263 | 24.5285  | 25.20955 | Q8BL97                            | Q8BL97                 | Serine/arginine-rich splicing factor 7           | Srsf7         |
| 27.23535 | 27.10149 | 26.95394 | Q8BQ46;F6QCIO                     | Q8BQ46;F6QCIO          | TAF15 RNA polymerase II, TATA box binding        | Taf15         |
| 24.7024  | 25.2021  | 24.82881 | Q8BVU5;A2AH28;A2AH27;A2AH29       | Q8BVU5;A2AH28;A2AH27   | ADP-ribose pyrophosphatase, mitochondrial        | Nudt9         |
| 25.5285  | 25.72078 | 25.73376 | Q8C4F9;Q8CB78;O54965;A0A0G2JEM4   | Q8C4F9;Q8CB78;O54965;  | E3 ubiquitin-protein ligase RNF13                | Rnf13         |
| 25.72598 | 25.53445 | 25.59833 | Q8C5N9;O88736                     | Q8C5N9;O88736          | 3-keto-steroid reductase                         | Hsd17b7       |
| 23.82881 | 23.78955 | 24.27498 | Q8C788;Q91ZR2                     | Q8C788;Q91ZR2          | Sorting nexin;Sorting nexin-18                   | Snx18         |
| 23.391   | 23.48001 | 23.5285  | Q8CFI7                            | Q8CFI7                 | DNA-directed RNA polymerase II subunit RP        | Polr2b        |
| 24.49838 | 23.29614 | 23.91342 | Q8CH72;A2AGS0;A2AGS1              | Q8CH72                 | E3 ubiquitin-protein ligase TRIM32               | Trim32        |
| 24.39754 | 24.80931 | NaN      | Q8CJ53                            | Q8CJ53                 | Cdc42-interacting protein 4                      | Trip10        |
| NaN      | 24.62087 | 24.35111 | Q8JZN5;A0A0G2JDY4                 | Q8JZN5                 | Acyl-CoA dehydrogenase family member 9,          | Acad9         |
| 23.83846 | 24.02749 | 23.45513 | Q8JZQ2                            | Q8JZQ2                 | AFG3-like protein 2                              | Afg3l2        |
| 24.80931 | 24.67034 | 24.88577 | Q8K1J6;A0A0N4SUW4;A0A0N4SV41      | Q8K1J6;A0A0N4SUW4      | CCA tRNA nucleotidyltransferase 1, mitocho       | Trnt1         |
| 24.74919 | 24.64306 | 24.98468 | Q8K268                            | Q8K268                 | ATP-binding cassette sub-family F member 3       | Abcf3         |
| 23.63201 | 23.94949 | 23.66492 | Q8R059                            | Q8R059                 | UDP-glucose 4-epimerase                          | Gale3         |
| 23.86703 | 24.66492 | 24.84805 | Q8R105                            | Q8R105                 | Vacuolar protein sorting-associated protein      | Vps37c        |
| 25.54038 | 25.49838 | 25.30313 | Q8R1G6;A0A087WPL1;F7C957;E9Q996   | Q8R1G6;A0A087WPL1;F7   | PDZ and LIM domain protein 2;PDZ and LIM         | Pdlim2        |
| 25.32732 | 25.37782 | 25.32732 | Q8R2K3;Q9CYR0                     | Q8R2K3;Q9CYR0          | Single-stranded DNA binding protein 1;Singl      | Ssbp1         |
| 24.49228 | 23.89504 | 25.00196 | Q8R550;B0R0Y8;E9Q0C1              | Q8R550;B0R0Y8;E9Q0C1   | SH3 domain-containing kinase-binding prote       | Sh3kbp1       |
| 23.49228 | NaN      | 23.31008 | Q8VCH6                            | Q8VCH6                 | Delta(24)-sterol reductase                       | Dhcr24        |
| NaN      | 23.88577 | NaN      | Q8VEB4;A0A1D5RLZ5                 | Q8VEB4;A0A1D5RLZ5      | Group XV phospholipase A2                        | Pla2g15       |
| 23.44253 | 23.46762 | 23.45513 | Q8VH51;F7AA45;E9Q8F0;B7ZD61;B7ZD  | Q8VH51;F7AA45;E9Q8F0;  | RNA-binding protein 39;RNA-binding protein       | Rbm39         |
| NaN      | NaN      | NaN      | Q91VJ2                            | Q91VJ2                 | Caveolae-associated protein 3                    | Cavin3        |
| NaN      | NaN      | NaN      | Q91VM5;A2AFI4;A2AFI3;Q9VWV02      | Q91VM5;A2AFI4;A2AFI3;Q | RNA binding motif protein, X-linked-like-1;R     | Rbmx1;Rbmx    |
| 25.22803 | 25.00624 | 25.60116 | Q91W53;Q9D428                     | Q91W53                 | Golgin subfamily A member 7                      | Golga7        |
| 25.35111 | NaN      | 25.21327 | Q921W0                            | Q921W0                 | Charged multivesicular body protein 1a           | Chmp1a        |
| 24.66492 | 24.71816 | 24.6811  | Q921Y0;Q3UDM0;Q8BPB0              | Q921Y0;Q3UDM0;Q8BPB0   | MOB kinase activator 1A;MOB kinase activa        | Mob1a;Mob1b   |
| 23.75939 | 23.85757 | 23.36453 | Q922H4;D3Z3L0;D3Z3M0;D3Z2L8;D3YV  | Q922H4                 | Mannose-1-phosphate guanylyltransferase al       | Gmppa         |
| 25.10949 | 25.06497 | 24.47383 | Q922Y1                            | Q922Y1                 | UBX domain-containing protein 1                  | Ubxn1         |
| 26.5285  | 26.56384 | 26.60399 | Q99JB2;A2AG41;A2AG39;F6WIO2       | Q99JB2                 | Stomatin-like protein 2, mitochondrial           | Stoml2        |
| 24.49228 | 24.8811  | 24.35111 | Q99KE1                            | Q99KE1                 | NAD-dependent malic enzyme, mitochondri          | Me2           |
| 24.1946  | 24.84805 | 24.50446 | Q99KR3                            | Q99KR3                 | Endoribonuclease LACTB2                          | Lactb2        |
| 23.56384 | 23.33756 | 23.84805 | Q99L13                            | Q99L13                 | 3-hydroxyisobutyrate dehydrogenase, mitoc        | Hibadh        |
| 24.42982 | 24.64306 | 24.64306 | Q99L27;Q9DCZ1                     | Q99L27                 | GMP reductase 2                                  | Gmpr2         |
| 23.29614 | 23.68646 | 23.79947 | Q99LM2;D6RJ46;F2Z486              | Q99LM2                 | CDK5 regulatory subunit-associated protein       | Cdk5rap3      |

|          |          |          |                                   |                                  |                                                |               |
|----------|----------|----------|-----------------------------------|----------------------------------|------------------------------------------------|---------------|
| 25.81421 | 25.85757 | 25.391   | Q99M71;A0A1Y7VKS9                 | Q99M71                           | Mammalian ependymin-related protein 1          | Epd1          |
| 24.91798 | 25.10949 | 24.68646 | Q99PG2                            | Q99PG2                           | Opioid growth factor receptor                  | Ogfr          |
| 25.04843 | 24.20955 | 24.68646 | Q9CPP0                            | Q9CPP0                           | Nucleoplasmin-3                                | Npm3          |
| 27.05051 | 27.18896 | 26.68646 | Q9CPQ1;D3Z6E1;A0A0G2JDA6          | Q9CPQ1;D3Z6E1                    | Cytochrome c oxidase subunit 6C;Cytochrom      | Cox6c         |
| 26.35951 | 26.51352 | 26.17188 | Q9CPQ3                            | Q9CPQ3                           | Mitochondrial import receptor subunit TOM      | Tom22         |
| 26.45042 | 26.33756 | 26.57542 | Q9CPQ8                            | Q9CPQ8                           | ATP synthase subunit g, mitochondrial          | Atp5l         |
| 27.34942 | 27.509   | 27.54628 | Q9CPT4                            | Q9CPT4                           | Myeloid-derived growth factor                  | Mydgf         |
| 28.29789 | 28.5389  | 28.41941 | Q9CPW4;Q3UA72                     | Q9CPW4;Q3UA72                    | Actin-related protein 2/3 complex subunit 5    | Arp5          |
| 26.39591 | 26.26428 | 25.96279 | Q9CQ43;Q8VCG1                     | Q9CQ43;Q8VCG1                    | Deoxyuridine triphosphatase                    | Dut           |
| 25.43936 | 24.46139 | 24.94949 | Q9CQ45                            | Q9CQ45                           | Neudesin                                       | Nenf          |
| 27.3662  | 26.83846 | 27.67976 | Q9CCQ9                            | Q9CCQ9                           | GTP-binding protein SAR1b                      | Sar1b         |
| 24.8044  | 25.32045 | 24.73892 | Q9CQD4;Q99LU0                     | Q9CQD4;Q99LU0                    | Charged multivesicular body protein 1b-2;Ch    | Chmp1b2;Chmp  |
| 25.43936 | 25.34435 | 25.74407 | Q9CQE8                            | Q9CQE8                           | RNA transcription, translation and transport   | RTRAF         |
| 26.13907 | 26.05258 | 25.89273 | Q9CQ16;A0A1D5R1P1                 | Q9CQ16;A0A1D5R1P1                | Coactosin-like protein                         | Cot1          |
| 25.59548 | 25.56384 | 25.63478 | Q9CQM5                            | Q9CQM5                           | Thioredoxin domain-containing protein 17       | Txndc17       |
| 29.0427  | 28.83846 | 28.93438 | Q9CQV6;M0QWC2                     | Q9CQV6;M0QWC2                    | Microtubule-associated proteins 1A/1B light    | Map1lc3b      |
| 23.45513 | 23.31008 | 23.417   | Q9CR00;A0A0G2JGN6                 | Q9CR00;A0A0G2JGN6                | 26S proteasome non-ATPase regulatory sub       | Psm9          |
| 26.00838 | 26.57542 | 26.33586 | Q9CRA4;D3Z458                     | Q9CRA4                           | Methylsterol monooxygenase 1                   | Msmo1         |
| 24.71816 | 24.65403 | 24.70767 | Q9CRB9;S4R238;F6QFL0;Q9D9P1;D3Z0  | Q9CRB9;S4R238;F6QFL0;Q9D9P1;D3Z0 | MICOS complex subunit Mic19;MICOS comp         | Chchd3        |
| 23.5285  | NaN      | 22.55684 | Q9CXF8;G3UZK1                     | Q9CXF8;G3UZK1                    | Guanine nucleotide-binding protein G(i)/G(s    | Gng10;Gm2050  |
| 24.63201 | 23.84805 | 23.87643 | Q9CXT8                            | Q9CXT8                           | Mitochondrial-processing peptidase subunit     | Pmpcb         |
| 27.66628 | 27.61105 | 27.74535 | Q9CY50;A0A286YDB7;A0A286YCT4;A0A  | Q9CY50;A0A286YDB7;A0A286YCT4;A0A | Translocon-associated protein subunit alpha    | Ssr1          |
| 24.53445 | 24.85281 | 24.7543  | Q9CYA0                            | Q9CYA0                           | Cysteine-rich with EGF-like domain protein 2   | Crel2         |
| 25.1946  | 24.88577 | 25.03171 | Q9CZQ6;Q9J158;O08604;O08603;O086  | Q9CZQ6                           | Retinoic acid early-inducible protein 1-epsil  | Rme1e         |
| 25.07316 | 24.80931 | 24.87643 | Q9D172;A0A1W2P870;A0A1W2P7B6      | Q9D172;A0A1W2P870                | ES1 protein homolog, mitochondrial;ES1 pro     | D101hu81e     |
| 26.13907 | 26.15074 | 26.038   | Q9D1A2                            | Q9D1A2                           | Cytosolic non-specific dipeptidase             | Cndp2         |
| 25.36786 | 25.64306 | 25.93607 | Q9D358;A0A1W2P7X3;Q561M1          | Q9D358;A0A1W2P7X3;Q561M1         | Low molecular weight phosphotyrosine prot      | Acp1          |
| 24.17188 | 24.1332  | 24.74407 | Q9D4H8;E0CYT5                     | Q9D4H8;E0CYT5                    | Cullin-2;Cullin-2 (Fragment)                   | Cul2          |
| NaN      | 24.35111 | NaN      | Q9D4I9;P35288                     | Q9D4I9;P35288                    | RAB23, member RAS oncogene family, isofo       | Rab23         |
| 25.44253 | 25.55801 | 25.59833 | Q9D7H3;D3Z263;D6REI7;D6RD00       | Q9D7H3;D3Z263                    | RNA 3-terminal phosphatase cyclase;RNA 3-te    | Rttca;Rtca    |
| NaN      | 23.88577 | 24.10949 | Q9D7J6                            | Q9D7J6                           | Deoxyribonuclease-1-like 1                     | Dnase111      |
| 25.35783 | 24.55215 | 25.67842 | Q9D880                            | Q9D880                           | Mitochondrial import inner membrane trans      | Timm50        |
| 26.18139 | 26.26428 | 26.24445 | Q9D8V0;A3KGR9;Q6PGJ8              | Q9D8V0;A3KGR9                    | Minor histocompatibility antigen H13;Histo     | Hml13;H13     |
| NaN      | NaN      | 24.09346 | Q9DAR7;Q3TBW9                     | Q9DAR7;Q3TBW9                    | m7GpppX diphosphatase                          | Dcps          |
| 23.57542 | 23.51653 | 23.36453 | Q9DAU1                            | Q9DAU1                           | Protein canopy homolog 3                       | Cnpy3         |
| NaN      | NaN      | NaN      | Q9DAU7;A2A5G4;A2A5G5;A2A5G6       | Q9DAU7;A2A5G4;A2A5G5             | WAP four-disulfide core domain protein 2       | Wfp2          |
| NaN      | NaN      | NaN      | Q9DAV6                            | Q9DAV6                           | R86                                            | Serpinb9b     |
| 25.59833 | 25.04427 | 25.4073  | Q9DB15                            | Q9DB15                           | 39S ribosomal protein L12, mitochondrial       | Mrpl12        |
| 25.239   | 25.32389 | 25.1055  | Q9DB34;A0A1B0GT75;A0A1B0GR63;AO   | Q9DB34;A0A1B0GT75;A0A1B0GR63;AO  | Charged multivesicular body protein 2a         | Chmp2a        |
| 24.64306 | 24.21697 | 23.79947 | Q9DBE8                            | Q9DBE8                           | Alpha-1,3/1,6-mannosyltransferase ALG2         | Alg2          |
| 26.92025 | 26.42342 | 26.83846 | Q9DBG5                            | Q9DBG5                           | Perilipin-3                                    | Plin3         |
| 25.65949 | 25.58978 | 25.79699 | Q9DCC4                            | Q9DCC4                           | Pyrraline-5-carboxylate reductase 3            | Pycr3         |
| 24.03591 | 23.83846 | 23.81909 | Q9DCC5;P23198;D3Z1A9;D3Z313;Q7TP  | Q9DCC5;P23198                    | Cbx3 protein;Chromobox protein homolog 3       | Cbx3          |
| 28.11148 | 28.16997 | 28.20769 | Q9DCK3;D3Z0B7;D3Z0T3              | Q9DCK3;D3Z0B7;D3Z0T3             | Tetraspanin-4;Tetraspanin (Fragment)           | Tspan4        |
| 25.27853 | 25.32732 | 25.27142 | Q9DCM0                            | Q9DCM0                           | Persulfide dioxygenase ETHE1, mitochondria     | Ethe1         |
| 24.38443 | 24.28207 | 24.17188 | Q9EQQ9                            | Q9EQQ9                           | Protein O-GlcNAcase                            | Mgea5         |
| 24.71816 | 25.73635 | 24.7543  | Q9ER39                            | Q9ER39                           | Torsin-1A                                      | Tor1a         |
| 25.73892 | 25.81421 | 25.51653 | Q9ER41;F6VK94;D6REF0;F6ZDX6       | Q9ER41;F6VK94;D6REF0             | Torsin-1B;Torsin-1B (Fragment)                 | Tor1b         |
| 25.81176 | 26.04843 | 25.90885 | Q9ERG0                            | Q9ERG0                           | LIM domain and actin-binding protein 1         | Lima1         |
| 30.23078 | 30.13614 | 30.06085 | Q9ES97                            | Q9ES97                           | Reticulon-3                                    | Rtn3          |
| NaN      | NaN      | NaN      | Q9ESM6                            | Q9ESM6                           | Glycerophosphoinositol inositolphosphodie      | Gdpd2         |
| 25.58118 | 25.75175 | 25.28912 | Q9EST5                            | Q9EST5                           | Acidic leucine-rich nuclear phosphoprotein 3   | Anp32b        |
| 25.97158 | 25.92025 | 25.72858 | Q9ET30                            | Q9ET30                           | Transmembrane 9 superfamily member 3           | Tm9sf3        |
| 28.60399 | 28.62157 | 28.41135 | Q9JIJ8                            | Q9JIJ8                           | 60S ribosomal protein L38                      | Rpl38         |
| 25.99981 | 26.24445 | 26.14686 | Q9JIU8                            | Q9JIU8                           | SH3 domain-binding glutamic acid-rich-like     | Sh3bgr1       |
| 24.35111 | 24.44253 | 24.02749 | Q9JKY0                            | Q9JKY0                           | CCR4-NOT transcription complex subunit 9       | Cnot9         |
| NaN      | 25.1488  | NaN      | Q9QZ85;Q3UED7                     | Q9QZ85                           | Interferon-inducible GTPase 1                  | Ilgp1         |
| 23.68646 | 22.0426  | 23.88577 | Q9WTX6;Q3TPM3;A0A0N4SUW1;D3Z2     | Q9WTX6;Q3TPM3                    | Cullin-1;Cullin-1 (Fragment)                   | Cul1          |
| NaN      | NaN      | NaN      | Q9WTY4                            | Q9WTY4                           | Aquaporin-5                                    | Aqp5          |
| 24.08537 | 23.80931 | NaN      | Q9Z0E6;E9QZN7                     | Q9Z0E6                           | Guanylate-binding protein 2                    | Gbp2          |
| 23.81909 | 23.80931 | 24.15653 | Q9Z0P5;A0A111SU53;A0A111STC8;AO   | Q9Z0P5;A0A111SU53                | Twinfilin-2;Twinfilin-2 (Fragment)             | Twf2          |
| 24.37119 | 24.00196 | 24.06085 | Q9Z0R9                            | Q9Z0R9                           | Fatty acid desaturase 2                        | Fads2         |
| 23.56384 | 23.21401 | 23.23754 | Q9Z1F9;H3BLM2;H3BLR3              | Q9Z1F9                           | SUMO-activating enzyme subunit 2               | Uba2          |
| 24.1332  | 23.75939 | 24.29614 | Q9Z2X2                            | Q9Z2X2                           | 26S proteasome non-ATPase regulatory sub       | Psm10         |
| 24.66492 | 24.53445 | NaN      | S4R2T5;Q9D906;S4R2P7;S4R2D5;A0A0  | S4R2T5;Q9D906;S4R2P7;S           | Ubiquitin-like modifier-activating enzyme A1   | Atg7          |
| 23.0592  | 23.40406 | NaN      | A0A023T778;Q9CQL1;P61327;G3UWZ7   | A0A023T778;Q9CQL1;P61            | Mago nashi protein;Protein mago nashi hom      | Magohb;Magoh  |
| NaN      | NaN      | NaN      | A0A087WQT6;O89110                 | A0A087WQT6;O89110                | Caspase-8                                      | Casp8         |
| 24.64306 | 24.91342 | 25.24627 | A0A087WR20;P49935;D3Z437          | A0A087WR20;P49935                | Pro-cathepsin H (Fragment);Pro-cathepsin H     | Ctsh          |
| 25.13712 | 24.91798 | 24.80931 | A0A087WRP7;A0A087WNZ5;P0CW02;P    | A0A087WRP7;A0A087WN              | Lymphocyte antigen 6C1 (Fragment);Lympho       | Ly6c1;        |
| 23.6971  | 23.86703 | 24.09346 | A0A0A0MQB0;Q4PJX1                 | A0A0A0MQB0;Q4PJX1                | cDNA sequence BC003331;Protein odr-4 hor       | BC003331;Odr4 |
| 22.71607 | 22.43746 | 22.41183 | A0A0A6YXY1;A0A0A6YX97;A2APZ3;Q8R  | A0A0A6YXY1;A0A0A6YX97            | N-terminal Xaa-Pro-Lys N-methyltransferase     | Ntmt1         |
| NaN      | NaN      | NaN      | A0A0B4J1E4;Q5U431                 | A0A0B4J1E4;Q5U431                | G-protein-coupled receptor 39;G-protein co     | Gpr39         |
| 22.58921 | NaN      | NaN      | A0A0G2JG00;Q3TUE1;A0A0G2JGW9;AO   | A0A0G2JG00;Q3TUE1;AO             | Far upstream element-binding protein 1         | Fubp1         |
| 22.80735 | 22.75939 | 23.09989 | A0A0H2UH17;A0A0G2JDV6;Q80X50;AO   | A0A0H2UH17;A0A0G2JDV             | Ubiquitin associated protein 2-like, isoform   | Ubp2l         |
| 24.28912 | 23.93157 | 23.24336 | A0A0N4SVQ1;Q62425                 | A0A0N4SVQ1;Q62425                | Cytochrome c oxidase subunit NDUFA4            | Nduf4         |
| 23.81909 | NaN      | 23.33756 | A0A0R4J078;Q8VCH8;A0A087WSK5      | A0A0R4J078;Q8VCH8                | UBX domain containing 2, isoform CRA_a;UB      | Ubxn4         |
| 23.417   | 24.1795  | 24.01903 | A0A0R4J0G6;Q9CYK2                 | A0A0R4J0G6;Q9CYK2                | Glutaminyl-peptide cyclotransferase            | Qpct          |
| 24.22435 | 24.73376 | 24.80931 | A0A0R4J0K1;Q9ERR7;A0A0G2JEF3;AO   | A0A0R4J0K1;Q9ERR7;AO             | Selenoprotein F;Selenoprotein F (Fragment)     | Selenof       |
| 25.26428 | 25.1757  | 25.2571  | A0A0R4J0K4;Q9CRG1                 | A0A0R4J0K4;Q9CRG1                | Transmembrane 7 superfamily member 3           | Tm7sf3        |
| 23.67573 | 23.80931 | 23.93157 | A0A0R4J150;B9EJ86                 | A0A0R4J150;B9EJ86                | Oxysterol-binding protein;Oxysterol-binding    | Oxsb18        |
| 25.75939 | 25.54922 | 26.20955 | A0A0R4J1V1;Q75N73;D3Z6P5;D3Z354;I | A0A0R4J1V1;Q75N73;D3Z            | Solute carrier family 39 (Zinc transporter), n | Slc39a14      |
| 20.43746 | NaN      | NaN      | A0A0R4J268;G3X8V6;O70458          | A0A0R4J268;G3X8V6;O70            | Oncostatin-M-specific receptor subunit beta    | Osmr          |
| 25.49228 | 25.391   | 25.52253 | A0A0U1RP13;Q8VDP6;A0A0U1RP60;AO   | A0A0U1RP13;Q8VDP6                | CDP-diacylglycerol--inositol 3-phosphatidyl    | Cdipt         |
| 24.12534 | 24.16423 | 24.11744 | A0A0U1RPF2;Q99P31                 | A0A0U1RPF2;Q99P31                | Hsp70-binding protein 1 (Fragment);Hsp70       | Hspbp1        |
| 24.16423 | 24.10949 | 24.71816 | A0A1B0GRP7;Q9Z2Y8;A0A1B0GQY5;AO   | A0A1B0GRP7;Q9Z2Y8;AO             | Pyridoxal phosphate-binding protein (Frags     | Plpbb         |
| NaN      | NaN      | NaN      | A0A1D5R1S2;A0A1D5R2M3;Q9CF3;AO    | A0A1D5R1S2;A0A1D5R2M             | Cleavage and polyadenylation-specificity fac   | Nudt21        |
| NaN      | NaN      | NaN      | A0A1D5RM88;A0A1D5R1E0;E9QMR2;AO   | A0A1D5RM88;A0A1D5R1E             | Dedicator of cytokinesis protein 9 (Frags      | Dock9         |
| 24.239   | 24.48001 | NaN      | A0A1L1SRG5;P23927                 | A0A1L1SRG5;P23927                | Alpha-crystallin B chain (Fragment);Alpha-cr   | Cryab         |



|          |          |          |                                                             |                                                             |                                                                |                 |
|----------|----------|----------|-------------------------------------------------------------|-------------------------------------------------------------|----------------------------------------------------------------|-----------------|
| 24.18707 | 24.31008 | 24.59833 | P25322                                                      | P25322                                                      | G1/S-specific cyclin-D1                                        | Ccnd1           |
| 23.5285  | 24.44253 | 23.54038 | P27790                                                      | P27790                                                      | Major centromere autoantigen B                                 | Cenpb           |
| 23.95837 | 23.84805 | 23.46762 | P33174                                                      | P33174                                                      | Chromosome-associated kinesin KIF4                             | Kif4            |
| 23.90426 | 23.89504 | 24.35783 | P35585                                                      | P35585                                                      | AP-1 complex subunit mu-1                                      | Ap1m1           |
| 30.6372  | 30.65438 | 30.59335 | P35762;A0A140LJL0                                           | P35762;A0A140LJL0                                           | CD81 antigen;CD81 antigen (Fragment)                           | Cd81            |
| NaN      | NaN      | NaN      | P36552                                                      | P36552                                                      | Oxygen-dependent coporphyrinogen-III                           | Cpox            |
| NaN      | NaN      | NaN      | P39688;D3YZ57                                               | P39688;D3YZ57                                               | Tyrosine-protein kinase Fyn;Tyrosine-protein                   | Fyn             |
| 24.36453 | 24.239   | 23.57542 | P49769;A0A0R4J1F2;Q3U4P5;Q61144                             | P49769;A0A0R4J1F2;Q3U4P5;Q61144                             | Presenilin-1;Presenilin;Presenilin-2                           | Psen1;Psen2     |
| 26.02538 | 26.0874  | 26.00624 | P49962;D3YZX8                                               | P49962                                                      | Signal recognition particle 9 kDa protein                      | Srp9            |
| 26.78955 | 27.00838 | 26.72598 | P50637;A0A140LIU9                                           | P50637                                                      | Translocator protein                                           | Tspo            |
| 26.78955 | 26.57542 | 26.71293 | P51807                                                      | P51807                                                      | Dynein light chain Tctex-type 1                                | Dynlt1          |
| 22.96895 | 23.15808 | 23.68646 | P52479                                                      | P52479                                                      | Ubiquitin carboxyl-terminal hydrolase 10                       | Usp10           |
| 23.94056 | 23.65403 | 24.42342 | P52633;D3YU28                                               | P52633                                                      | Signal transducer and transcription activator                  | Stat6           |
| 25.41377 | 25.46451 | 25.73635 | P52927;Q6NSP9                                               | P52927;Q6NSP9                                               | High mobility group protein HMGI-C                             | Hmga2           |
| 26.90885 | 26.81421 | 26.82639 | P56382                                                      | P56382                                                      | ATP synthase subunit epsilon, mitochondrial                    | Atp5e           |
| NaN      | 25.00196 | 24.75939 | P56389                                                      | P56389                                                      | Cytidine deaminase                                             | Cda             |
| 25.60116 | 25.53445 | 25.46762 | P56391;A0A140LIU3                                           | P56391;A0A140LIU3                                           | Cytochrome c oxidase subunit 6B1                               | Cox6b1          |
| 25.63755 | 25.59833 | 25.75175 | P56812;D3Z7Q5                                               | P56812;D3Z7Q5                                               | Programmed cell death protein 5                                | Pdcd5           |
| 24.6811  | 24.28207 | 24.04427 | P61028                                                      | P61028                                                      | Ras-related protein Rab-8B                                     | Rab8b           |
| 25.80931 | 25.94726 | 25.90656 | P61804                                                      | P61804                                                      | Dolichyl-diphosphooligosaccharide--protein                     | Dad1            |
| 24.88577 | 24.98033 | 24.94503 | P61924                                                      | P61924                                                      | Coatomer subunit zeta-1                                        | Copz1           |
| 22.08213 | 22.49473 | 22.59149 | P61967;D3Z268;D3Z0D6;D3YXN0                                 | P61967;D3Z268;D3Z0D6;D3YXN0                                 | AP-1 complex subunit sigma-1A;AP-1 complex                     | Ap1s1           |
| 27.26249 | 27.33245 | 27.50142 | P62075;A0A1W2P756;A0A1W2P7H2                                | P62075;A0A1W2P756                                           | Mitochondrial import inner membrane translocase                | Timm13          |
| 25.5285  | 25.32045 | 25.63478 | P62141;A0A0J9YU8;A0A0J9YUG2                                 | P62141                                                      | Serine/threonine-protein phosphatase PP1-epsilon               | Ppp1cb          |
| 25.81909 | 25.99766 | 25.7543  | P62274                                                      | P62274                                                      | 40S ribosomal protein S29                                      | Rps29           |
| 24.94056 | 24.64306 | 24.86703 | P62305;E9Q4F4;E9Q0W8                                        | P62305;E9Q4F4                                               | Small nuclear ribonucleoprotein E                              | Snrpe           |
| 26.47073 | 26.56238 | 25.97158 | P62315                                                      | P62315                                                      | Small nuclear ribonucleoprotein Sm D1                          | Snrpd1          |
| 23.59833 | 24.26785 | 23.96719 | P62746                                                      | P62746                                                      | Rho-related GTP-binding protein RhoB                           | RhoB            |
| 25.08132 | 24.66492 | 24.90426 | P62878                                                      | P62878                                                      | E3 ubiquitin-protein ligase RBX1                               | Rbx1            |
| 26.15846 | 25.89966 | 26.22435 | P63087;A0A0G2JGC1;A0A0G2JFF1                                | P63087;A0A0G2JGC1;A0A0G2JFF1                                | Serine/threonine-protein phosphatase PP1-epsilon               | Ppp1cc          |
| 25.65949 | 25.79203 | 26.10149 | P63321;A0A1Y7VL93                                           | P63321;A0A1Y7VL93                                           | Ras-related protein RaL;Ras-related protein                    | Rala            |
| 30.68813 | 30.75334 | 30.42342 | P68369;P05214;Q3UX10                                        | P68369;P05214                                               | Tubulin alpha-1A chain;Tubulin alpha-3 chain                   | Tuba1a;Tuba3a   |
| 24.49228 | 24.22435 | 24.18707 | P70280                                                      | P70280                                                      | Vesicle-associated membrane protein 7                          | Vamp7           |
| 26.58978 | 26.54775 | 25.82396 | P83741                                                      | P83741                                                      | Serine/threonine-protein kinase WNK1                           | Wnk1            |
| 23.72858 | 23.99335 | 24.10949 | P83887;Q8VCK3                                               | P83887;Q8VCK3                                               | Tubulin gamma-1 chain;Tubulin gamma-2 chain                    | Tubg1;Tubg2     |
| NaN      | 23.33756 | 23.31008 | P84089;A0A1W2P7H9;A0A1W2P7T3;G8P84089;A0A1W2P7H9;A0A1W2P7T3 | P84089;A0A1W2P7H9;A0A1W2P7T3;G8P84089;A0A1W2P7H9;A0A1W2P7T3 | Enhancer of rudimentary homolog                                | Erh             |
| 25.91798 | 25.64031 | 25.66492 | P84104;A2A4X6                                               | P84104                                                      | Serine/arginine-rich splicing factor 3                         | Srsf3           |
| NaN      | NaN      | NaN      | P97348;G3X9Y4                                               | P97348                                                      | Rho-related GTP-binding protein RhoD                           | Rhod            |
| 26.95394 | 26.90885 | 26.82639 | P97450;E9QAD6                                               | P97450                                                      | ATP synthase-coupling factor 6, mitochondrial                  | Atp5j           |
| 23.21697 | 23.42982 | 24.06907 | P97465                                                      | P97465                                                      | Docking protein 1                                              | Dok1            |
| NaN      | NaN      | NaN      | P97470;A0A0U1RPR5;A0A0U1RQ12                                | P97470                                                      | Serine/threonine-protein phosphatase 4 catalytic subunit       | Ppp4c           |
| 23.99335 | 24.74407 | 24.84326 | P97494                                                      | P97494                                                      | Glutamate--cysteine ligase catalytic subunit                   | Gclc            |
| 23.66492 | 24.07725 | 23.83846 | P97770;D3YYB2                                               | P97770                                                      | THUMP domain-containing protein 3                              | Thumpd3         |
| NaN      | NaN      | NaN      | P98064                                                      | P98064                                                      | Mannan-binding lectin serine protease 1                        | Masp1           |
| 24.90426 | 25.00624 | 24.78457 | P99025                                                      | P99025                                                      | GTP cyclohydrolase 1 feedback regulatory protein               | Gchfr           |
| 24.37119 | 23.86703 | 23.20508 | Q02257                                                      | Q02257                                                      | Junction plakoglobin                                           | Jup             |
| NaN      | NaN      | NaN      | Q04690;Q5SYH9                                               | Q04690                                                      | Neurofibromin                                                  | Nf1             |
| NaN      | NaN      | NaN      | Q04750                                                      | Q04750                                                      | DNA topoisomerase 1                                            | Top1            |
| 24.66492 | 24.16423 | 23.56384 | Q06138                                                      | Q06138                                                      | Calcium-binding protein 39                                     | Cab39           |
| NaN      | 23.391   | 23.83846 | Q3B7Z2                                                      | Q3B7Z2                                                      | Oxysterol-binding protein 1                                    | Osbp            |
| 24.33074 | 24.01903 | 24.59263 | Q3TC93;A0A1W2P6R8                                           | Q3TC93;A0A1W2P6R8                                           | HCLS1-binding protein 3;HCLS1-binding protein                  | Hslbp3          |
| 23.1991  | 22.83653 | NaN      | Q3TFD2                                                      | Q3TFD2                                                      | Lysophosphatidylcholine acyltransferase 1                      | Lpcat1          |
| 24.22435 | 23.01052 | 23.99335 | Q3TL72;Q8C878                                               | Q3TL72;Q8C878                                               | NEDD8-activating enzyme E1 catalytic subunit                   | Uba3            |
| NaN      | NaN      | NaN      | Q3TLP5;F6Z5N5;F6YTG0                                        | Q3TLP5;F6Z5N5;F6YTG0                                        | Enoyl-CoA hydratase domain-containing protein                  | Echdc2          |
| NaN      | 22.69073 | 23.26785 | Q3TYL7;Q9QYJ3                                               | Q3TYL7;Q9QYJ3                                               | DnaJ homolog subfamily B member 1                              | Dnajb1          |
| 24.22435 | 23.88577 | 23.75939 | Q3U1V6;A0A140LHE8;A0A1B0GSG9                                | Q3U1V6                                                      | Ubiquitin-conjugating enzyme E2 variant 3                      | Ubevl3          |
| NaN      | NaN      | NaN      | Q3U1Z5;G3UYL4                                               | Q3U1Z5                                                      | G-protein-signaling modulator 3                                | Gpsm3           |
| 25.83846 | 25.23535 | 25.71555 | Q3UGC7;Q66JS6                                               | Q3UGC7;Q66JS6                                               | Eukaryotic translation initiation factor 3 subunit 1           | Eif3j1;Eif3j2   |
| 25.23535 | 24.96719 | 24.72858 | Q3UGR5                                                      | Q3UGR5                                                      | Haloacid dehalogenase-like hydrolase domain-containing protein | Hdhhd2          |
| 25.47692 | 25.63201 | 25.56384 | Q3UMB5                                                      | Q3UMB5                                                      | Guanine nucleotide exchange protein SMCR8                      | Smcr8           |
| NaN      | NaN      | NaN      | Q3V1G4                                                      | Q3V1G4                                                      | Olfactomedin-like protein 2B                                   | Olfml2b         |
| NaN      | NaN      | NaN      | Q4VBE8                                                      | Q4VBE8                                                      | WD repeat-containing protein 18                                | Wdr18           |
| 23.89504 | 23.62087 | 23.82881 | Q544X6;P22315                                               | Q544X6;P22315                                               | Ferrochelatase;Ferrochelatase, mitochondrial                   | Fech            |
| 23.07725 | 22.06907 | 23.67573 | Q571E4;Q8CC47                                               | Q571E4;Q8CC47                                               | N-acetylgalactosamine-6-sulfatase                              | Galns           |
| 24.04427 | 23.96719 | 24.29614 | Q5Y5T1                                                      | Q5Y5T1                                                      | Probable palmitoyltransferase ZDHHC20                          | Zdhhc20         |
| NaN      | NaN      | NaN      | Q61112                                                      | Q61112                                                      | 45 kDa calcium-binding protein                                 | Sdf4            |
| NaN      | 23.5285  | 23.57542 | Q61249                                                      | Q61249                                                      | Immunoglobulin-binding protein 1                               | Igbbp1          |
| 25.41054 | 25.75175 | 25.2856  | Q61469                                                      | Q61469                                                      | Phospholipid phosphatase 1                                     | Plpp1           |
| 25.20583 | 24.43619 | 24.26069 | Q61625                                                      | Q61625                                                      | Glutamate receptor ionotropic, delta-2                         | Griid2          |
| 24.17188 | 23.2006  | 23.16883 | Q61635;A0A1L1SQM2                                           | Q61635;A0A1L1SQM2                                           | GTP-binding protein;Interferon gamma-inducible protein         | Iifi47          |
| 24.39754 | 24.5285  | 24.51051 | Q61771;A0A1D5RLM0;A0A0R4J220;A2A0R4J220                     | Q61771                                                      | Kinesin-like protein KIF3B                                     | Kif3b           |
| 24.53445 | 25.23169 | 25.59833 | Q62084                                                      | Q62084                                                      | Protein phosphatase 1 regulatory subunit 14                    | Ppp1r14b        |
| 21.95305 | NaN      | NaN      | Q62093                                                      | Q62093                                                      | Serine/arginine-rich splicing factor 2                         | Srsf2           |
| NaN      | 23.09507 | 23.18707 | Q64010;Q3TQV3;Q8JZR2;Q5ND50                                 | Q64010                                                      | Adapter molecule crk                                           | Crk             |
| 27.28912 | 26.95394 | 27.75175 | Q64152                                                      | Q64152                                                      | Transcription factor BTF3                                      | Btf3            |
| 26.45356 | 26.75175 | 27.39917 | Q64339                                                      | Q64339                                                      | Ubiquitin-like protein ISG15                                   | Isg15           |
| 27.18896 | 27.24445 | 26.11347 | Q64523;Q6GSS7;Q64522                                        | Q64523;Q6GSS7                                               | Histone H2A type 2-C;Histone H2A type 2-A                      | Hist2h2ac;Hist2 |
| NaN      | NaN      | NaN      | Q68FE6                                                      | Q68FE6                                                      | Rho family-interacting cell polarization regulator             | Ripor1          |
| NaN      | NaN      | NaN      | Q6DID7                                                      | Q6DID7                                                      | Protein wntless homolog                                        | Wls             |
| 27.2535  | 25.92931 | 27.89157 | Q6GV12                                                      | Q6GV12                                                      | 3-ketodihydrosphingosine reductase                             | Kdsr            |
| 25.05258 | 25.09346 | 25.12928 | Q6NS82;A0A087WNS5;A0A087WNV4;A0A087WNS5;A0A087WNS4          | Q6NS82;A0A087WNS5;A0A087WNV4;A0A087WNS5;A0A087WNS4          | Reticulophagy regulator 2;Reticulophagy regulator              | Retreg2         |
| 23.35111 | 23.417   | 23.87643 | Q6P5B5;Q9WVVR4                                              | Q6P5B5;Q9WVVR4                                              | Fragile X mental retardation syndrome-related protein          | Fxr2            |
| 26.40406 | 26.60399 | 26.2535  | Q6P5F7                                                      | Q6P5F7                                                      | Protein tweety homolog 3                                       | Ttyh3           |
| 25.01903 | 25.18329 | 25.32045 | Q6P5H2                                                      | Q6P5H2                                                      | Nestin                                                         | Nes             |
| NaN      | NaN      | NaN      | Q6PFB2;Q8VE37                                               | Q6PFB2;Q8VE37                                               | Rcc1 protein;Regulator of chromosome condensation              | Rcc1            |
| NaN      | NaN      | NaN      | Q6PFQ7;F6WTE9                                               | Q6PFQ7                                                      | Ras GTPase-activating protein 4                                | Rasa4           |
| 25.76446 | 25.71555 | 25.7415  | Q6ZWQ7                                                      | Q6ZWQ7                                                      | Signal peptidase complex subunit 3                             | Spcc3           |
| 26.44411 | 26.038   | 26.27142 | Q6ZWY3;D6RH49;D3YYB0                                        | Q6ZWY3;D6RH49;D3YYB0                                        | 40S ribosomal protein S27-like;40S ribosomal protein           | Rps27l          |

|          |          |          |                                         |                              |                                                                                 |               |
|----------|----------|----------|-----------------------------------------|------------------------------|---------------------------------------------------------------------------------|---------------|
| NaN      | NaN      | NaN      | Q7M759                                  | Q7M759                       | Protein ABHD17B                                                                 | Abhd17b       |
| NaN      | NaN      | NaN      | Q7TMY7;B2KGD7                           | Q7TMY7;B2KGD7                | Importin-8;Importin-8 (Fragment)                                                | Ipo8          |
| 26.1035  | 26.81421 | 26.06085 | Q80UP8                                  | Q80UP8                       | Sodium-dependent phosphate transporter 2                                        | Slc20a2       |
| NaN      | NaN      | 23.28207 | Q80UW2                                  | Q80UW2                       | F-box only protein 2                                                            | Fbxo2         |
| 24.12534 | 25.08132 | 24.77455 | Q80VJ3                                  | Q80VJ3                       | 2-deoxynucleoside 5-phosphate N-hydrolase                                       | Dnph1         |
| 22.48493 | 22.57311 | 22.86136 | Q80YV4;F7B6K4                           | Q80YV4                       | Pantothenate kinase 4                                                           | Pank4         |
| 25.86703 | 25.75175 | 25.89966 | Q8BG13;O89086;54R2M6                    | Q8BG13;O89086                | RNA-binding protein 3                                                           | Rbm3          |
| NaN      | NaN      | NaN      | Q8BG60                                  | Q8BG60                       | Thioredoxin-interacting protein                                                 | Txnip         |
| 24.15653 | 24.49838 | 24.22435 | Q8BH58;A0A0A6YY87                       | Q8BH58                       | TIP41-like protein                                                              | Tipr1         |
| 24.77957 | 24.79947 | 24.61526 | Q8BH79;A0A1L1SS60;A0A1L1SR14            | Q8BH79;A0A1L1SS60            | Anoctamin-10;Anoctamin                                                          | Ano10         |
| 25.64306 | 25.97596 | 25.33756 | Q8BHC4;B0QZX9                           | Q8BHC4;B0QZX9                | Dephospho-CoA kinase domain-containing protein                                  | Dcakd         |
| NaN      | 23.40406 | 23.77957 | Q8BIW1                                  | Q8BIW1                       | Exopolyphosphatase PRUNE1                                                       | Prune1        |
| 24.06907 | 24.00196 | 24.23169 | Q8BJF9                                  | Q8BJF9                       | Charged multivesicular body protein 2b                                          | Chmp2b        |
| 24.28912 | 24.36453 | 25.33415 | Q8BS45;E0CYE0;E0CXQ7;E0CX73             | Q8BS45;E0CYE0                | Intraflagellar transport protein 56;Intraflagellar                              | Ttc26         |
| 23.1047  | 23.04093 | NaN      | Q8BTS3                                  | Q8BTS3                       | Guanylate-binding protein 9                                                     | Gbp9          |
| 23.44253 | 22.89689 | 22.89319 | Q8BTZ7                                  | Q8BTZ7                       | Mannose-1-phosphate guanyltriferase beta                                        | Gmpppb        |
| 25.11744 | 25.04009 | 25.12139 | Q8BVF2;A0A0A6YXV1                       | Q8BVF2                       | Phosducin-like protein 3                                                        | Pdc13         |
| 24.90426 | 25.4073  | 25.35111 | Q8BVG4                                  | Q8BVG4                       | Dipeptidyl peptidase 9                                                          | Dpp9          |
| 25.71555 | 25.75175 | 25.97815 | Q8BYI6                                  | Q8BYI6                       | Lysophosphatidylcholine acyltransferase 2                                       | Lpcat2        |
| 24.20955 | 24.20955 | 24.15653 | Q8BYI8                                  | Q8BYI8                       | Protein FAM234B                                                                 | Fam234b       |
| 23.26785 | 22.87079 | 23.35111 | Q8BYY4                                  | Q8BYY4                       | Tetratricopeptide repeat protein 39B                                            | Ttc39b        |
| 22.56384 | NaN      | NaN      | Q8BZ03;D3Z6I0;Q5FWX6;Q8K1Y2;Q621        | Q8BZ03                       | Serine/threonine-protein kinase D2                                              | Prkd2         |
| 24.84326 | 24.80931 | 25.04427 | Q8C1E7;D3Z0U3                           | Q8C1E7                       | Transmembrane protein 120A                                                      | Tmem120a      |
| 24.239   | 24.05258 | 24.32389 | Q8C3Y4                                  | Q8C3Y4                       | Kinetochore-associated protein 1                                                | Kntc1         |
| 25.68646 | 25.83846 | 25.78457 | Q8C7K6;A0A0A6YY26                       | Q8C7K6;A0A0A6YY26            | Prenylcysteine oxidase-like                                                     | Pcyox1l       |
| NaN      | NaN      | 22.42214 | Q8CBQ5                                  | Q8CBQ5                       | Phosphatidylinositol 4-kinase type 2-beta                                       | Pi4k2b        |
| 29.1795  | 28.66966 | 28.64924 | Q8CCG1                                  | Q8CCG1                       | Zinc finger C2HC domain-containing protein                                      | Zc2hc1c       |
| 23.08537 | 23.29614 | 23.26785 | Q8CCH2                                  | Q8CCH2                       | NHL repeat-containing protein 3                                                 | Nhlrc3        |
| 23.2021  | 23.51653 | 23.04926 | Q8CDM8                                  | Q8CDM8                       | Protein FAM160B1                                                                | Fam160b1      |
| 23.60964 | 23.36453 | 23.28207 | Q8K057;D3Z157;D3YWI8                    | Q8K057                       | Intraflagellar transport protein 80 homolog                                     | Ifi80         |
| 23.48001 | 23.40406 | 23.68646 | Q8K298;A0A1L1SS34                       | Q8K298;A0A1L1SS34            | Anillin;Anillin (Fragment)                                                      | Anln          |
| 19.20658 | NaN      | NaN      | Q8K2B0                                  | Q8K2B0                       | Endoplasmic reticulum protein SC65                                              | P3h4          |
| 25.62923 | 25.42662 | 25.75175 | Q8K2C9                                  | Q8K2C9                       | Very-long-chain (3R)-3-hydroxyacyl-CoA dehydrogenase                            | Hacd3         |
| 23.79947 | 23.82881 | 23.70767 | Q8K2V6                                  | Q8K2V6                       | Importin-11                                                                     | Ipo11         |
| 27.88577 | 27.89735 | 27.86231 | Q8K3G9                                  | Q8K3G9                       | DCC-interacting protein 13-beta                                                 | Appl2         |
| 23.21697 | 24.417   | NaN      | Q8K4X7                                  | Q8K4X7                       | 1-acyl-sn-glycerol-3-phosphate acyltransferase 4                                | Agpat4        |
| 24.59833 | 24.76446 | 24.57542 | Q8K4Z3                                  | Q8K4Z3                       | NAD(P)H-hydrate epimerase                                                       | Naxe          |
| 23.66492 | NaN      | 23.72858 | Q8R0J7                                  | Q8R0J7                       | Vacuolar protein sorting-associated protein 37b                                 | Vps37b        |
| 22.29894 | 23.42982 | 24.10949 | Q8R2Y0                                  | Q8R2Y0                       | Monoacylglycerol lipase ABHD6                                                   | Abhd6         |
| 25.28912 | 25.48922 | 25.46451 | Q8VBV7;A0A087WPM5                       | Q8VBV7;A0A087WPM5            | COP9 signalosome complex subunit 8;COP9                                         | Cops8         |
| NaN      | 25.32389 | 25.22803 | Q8VC30                                  | Q8VC30                       | Triokinase/FMN cyclase                                                          | Tkfc          |
| NaN      | NaN      | NaN      | Q8VCJ6                                  | Q8VCJ6                       | Mas-related G-protein coupled receptor member 10                                | Mrgprf        |
| NaN      | NaN      | NaN      | Q8VDV8                                  | Q8VDV8                       | MIT domain-containing protein 1                                                 | Mitd1         |
| 25.64856 | 25.27142 | 25.43936 | Q8VE47                                  | Q8VE47                       | Ubiquitin-like modifier-activating enzyme 5                                     | Uba5          |
| 26.04218 | 26.02327 | 26.26964 | Q8VEH3;F6QKK2                           | Q8VEH3;F6QKK2                | ADP-ribosylation factor-like protein 8A;ADP-ribosylation factor-like protein 8B | Arl8a         |
| 24.37119 | 24.59833 | 24.03591 | Q8VEK0;D3YVV1;Q8BHG3                    | Q8VEK0;D3YVV1                | Cell cycle control protein 50A                                                  | Tmem30a       |
| 24.37119 | 24.27498 | 23.96719 | Q8VHM5;F7B5B5;A2AW41                    | Q8VHM5;F7B5B5;A2AW41         | Heterogeneous nuclear ribonucleoprotein R                                       | Hnrnpr        |
| 24.51653 | 25.28207 | 24.96279 | Q91V01;A0A0N4SUM3                       | Q91V01                       | Lysophospholipid acyltransferase 5                                              | Lpcat3        |
| NaN      | NaN      | NaN      | Q91V08;A0A0N4SUR3;F5CSM7;Q9D676         | Q91V08                       | C-type lectin domain family 2 member D                                          | Clec2d        |
| 26.63201 | 26.69975 | 26.75175 | Q91VW3;I7HPY0                           | Q91VW3                       | SH3 domain-binding glutamic acid-rich-like protein 1                            | Sh3bgr13      |
| 23.63201 | NaN      | NaN      | Q91XH6;O88384;E0CYE5;F6UHS3             | Q91XH6;O88384                | Vesicle transport through interaction with tubulin                              | Vti1b         |
| NaN      | 24.95394 | NaN      | Q91Y8;E0CX44;E0CXM3                     | Q91Y8                        | CSC1-like protein 1                                                             | Tmem63a       |
| 23.83846 | 22.7348  | 23.28207 | Q923G2                                  | Q923G2                       | DNA-directed RNA polymerases I, II, and III subunit 2                           | Poir2h        |
| 23.94949 | 23.46762 | 24.06085 | Q925I1                                  | Q925I1                       | ATPase family AAA domain-containing protein 1                                   | Atad3         |
| 25.30661 | 25.05672 | 25.01903 | Q99J09;F7D5L2                           | Q99J09;F7D5L2                | Methylosome protein 50;Methylosome protein 50                                   | Wdr77         |
| 25.08537 | 24.7024  | 24.91798 | Q99J77                                  | Q99J77                       | Sialic acid synthase                                                            | Nans          |
| 26.02749 | 26.12337 | 26.239   | Q99J16;A0A1W2P777                       | Q99J16                       | Ras-related protein Rap-1b                                                      | Rap1b         |
| 23.81909 | NaN      | NaN      | Q99KD5;D6RIN1;A0A0U1RN14;D3YZN8         | Q99KD5;D6RIN1                | Protein unc-45 homolog A                                                        | Unc45a        |
| 23.93157 | 24.06085 | 24.01052 | Q99KH8;A2AD84;Q99JT2;D3Z359;Q9Z2        | Q99KH8;A2AD84;Q99JT2         | Serine/threonine-protein kinase 24;Serine/threonine-protein kinase 24           | Stk24;Stk26   |
| 26.82639 | 26.08335 | 25.6971  | Q99LC3;A0A087WR38                       | Q99LC3                       | NADH dehydrogenase [ubiquinone] 1 alpha subunit 1                               | Ndufa10       |
| 25.22066 | 25.1946  | 25.2021  | Q99MB1                                  | Q99MB1                       | Toll-like receptor 3                                                            | Tlr3          |
| 24.60964 | 24.58118 | 24.28912 | Q99P58;Q9ERI2                           | Q99P58                       | Ras-related protein Rab-27B                                                     | Rab27b        |
| 23.78955 | 23.86703 | 24.03591 | Q9CQ10;A0A0N4SVS3                       | Q9CQ10                       | Charged multivesicular body protein 3                                           | Chmp3         |
| 25.28207 | 25.239   | 25.50446 | Q9CQ48;E0CYQ2                           | Q9CQ48;E0CYQ2                | NudC domain-containing protein 2                                                | Nudcd2        |
| 25.42021 | 25.6971  | 25.36119 | Q9CQ69                                  | Q9CQ69                       | Cytochrome b-c1 complex subunit 8                                               | Uqcrcq        |
| 26.33415 | 26.60399 | 26.48769 | Q9CQ88                                  | Q9CQ88                       | Tetraspanin-31                                                                  | Tspan31       |
| 24.89504 | 25.27853 | 24.79452 | Q9CQF7;Q9CWM4                           | Q9CQF7;Q9CWM4                | Prefoldin 1;Prefoldin subunit 1                                                 | Pfdn1         |
| 22.34299 | NaN      | NaN      | Q9CQJ8                                  | Q9CQJ8                       | NADH dehydrogenase [ubiquinone] 1 beta subunit 9                                | Ndufb9        |
| NaN      | NaN      | NaN      | Q9CRB3;A0A1B0GR99;A0A0A0MQC3;A0A0A0MQC3 | Q9CRB3;A0A1B0GR99;A0A0A0MQC3 | 5-hydroxyisourate hydrolase;5-hydroxyisourate hydrolase                         | Urah          |
| 24.71293 | 25.1332  | 24.64306 | Q9CS42                                  | Q9CS42                       | Ribose-phosphate pyrophosphokinase 2                                            | Prps2         |
| 25.43301 | 24.98902 | 25.31354 | Q9CX34                                  | Q9CX34                       | Protein SGT1 homolog                                                            | Sugt1         |
| 24.86231 | 24.46139 | 24.64306 | Q9CYG7                                  | Q9CYG7                       | Mitochondrial import receptor subunit TOM20                                     | Tomm34        |
| 25.57542 | 25.44569 | 25.61526 | Q9CYL5;B1AWD6                           | Q9CYL5;B1AWD6                | Golgi-associated plant pathogenesis-related protein 2                           | Glipr2        |
| 24.43619 | 24.12534 | 24.76446 | Q9CZE3;A0A1Y7VIZ0                       | Q9CZE3                       | Ras-related protein Rab-32                                                      | Rab32         |
| 25.84566 | 25.68913 | 25.75685 | Q9D104;G5E8T3;Q9D7A6                    | Q9D104;G5E8T3;Q9D7A6         | Signal recognition particle 19 kDa protein                                      | Srp19         |
| 24.85757 | 24.97158 | 25.32389 | Q9D1B1                                  | Q9D1B1                       | Cystatin                                                                        | Cst6          |
| 25.42662 | 24.56384 | 24.6811  | Q9D281                                  | Q9D281                       | Protein Noxp20                                                                  | Fam114a1      |
| NaN      | 23.72858 | 23.99335 | Q9D554                                  | Q9D554                       | Splicing factor 3A subunit 3                                                    | Sf3a3         |
| 24.58118 | 24.71293 | 25.2021  | Q9D7M5                                  | Q9D7M5                       | Dynactin-associated protein                                                     | Dynap         |
| 26.65949 | 26.92025 | 26.63201 | Q9D757                                  | Q9D757                       | 60S ribosomal protein L22-like 1                                                | Rpl22l1       |
| 25.04843 | 25.39428 | 25.18329 | Q9D759                                  | Q9D759                       | Charged multivesicular body protein 5                                           | Chmp5         |
| 28.21234 | 26.41538 | 26.71293 | Q9D823                                  | Q9D823                       | 60S ribosomal protein L37                                                       | Rpl37         |
| 27.34096 | 27.12139 | 27.26249 | Q9D881;P19536;F7C106;A0A0A6YVRO         | Q9D881;P19536                | Cytochrome c oxidase subunit 5B, mitochondrial                                  | Gm11273;Cox5l |
| 23.74919 | 23.18404 | 23.21549 | Q9D883;G3UW94                           | Q9D883;G3UW94                | Splicing factor U2AF 35 kDa subunit;MCG147                                      | U2af1         |
| 26.08537 | 26.34604 | 25.64581 | Q9D8C4;D6RFB1                           | Q9D8C4                       | Interferon-induced 35 kDa protein homolog                                       | Ifi35         |
| 25.55801 | 25.86231 | 25.85043 | Q9D952                                  | Q9D952                       | Envoplakin                                                                      | Evp1          |
| NaN      | 24.23169 | NaN      | Q9DB25;D6RCG2                           | Q9DB25;D6RCG2                | Dolichyl-phosphate beta-glucosyltransferase                                     | Alg5          |
| 22.94592 | 23.03591 | 22.87455 | Q9DBD5;Q9D4T3                           | Q9DBD5                       | Proline-, glutamic acid- and leucine-rich protein                               | Pelp1         |

|          |          |          |                                    |                                |                                                |               |
|----------|----------|----------|------------------------------------|--------------------------------|------------------------------------------------|---------------|
| 24.64306 | 24.391   | 24.417   | Q9DCT2                             | Q9DCT2                         | NADH dehydrogenase [ubiquinone] iron-sulfur    | Ndufs3        |
| 26.34435 | 26.63201 | 26.2732  | Q9DCW5;P43024                      | Q9DCW5;P43024                  | Cytochrome c oxidase subunit 6A, mitochondri   | Cox6a1        |
| 22.88017 | 22.29894 | 22.48247 | Q9EP52                             | Q9EP52                         | Twisted gastrulation protein homolog 1         | Twsg1         |
| 24.42982 | 24.29614 | 24.30313 | Q9EPK2                             | Q9EPK2                         | Protein XRP2                                   | Rp2           |
| 25.83364 | 26.45513 | 26.30487 | Q9ER00                             | Q9ER00                         | Syntaxin-12                                    | Stx12         |
| 23.35111 | 21.9566  | NaN      | Q9ERU9;Q99KR7                      | Q9ERU9                         | E3 SUMO-protein ligase RanBP2                  | Ranbp2        |
| 24.08537 | NaN      | 23.31008 | Q9ESW8;AOA1B0GSY1                  | Q9ESW8;AOA1B0GSY1              | Pyroglutaryl-peptidase 1                       | Pgppe1        |
| 23.83846 | 23.57542 | NaN      | Q9ESY9                             | Q9ESY9                         | Gamma-interferon-inducible lysosomal thiol     | Ifi30         |
| NaN      | NaN      | NaN      | Q9JHE3                             | Q9JHE3                         | Neutral ceramidase                             | Asah2         |
| NaN      | NaN      | NaN      | Q9JI68;AOA140LJ36                  | Q9JI68;AOA140LJ36              | PRA1 family protein 2;PRA1 family protein      | Praf2;Gm45208 |
| 24.30313 | 25.04843 | 24.56384 | Q9JK92                             | Q9JK92                         | Heat shock protein beta-8                      | Hspb8         |
| 25.00196 | 25.239   | 24.8811  | Q9JKX6;AOA0A6YVU1;A2ATTS           | Q9JKX6;AOA0A6YVU1;A2ATTS       | ADP-sugar pyrophosphatase;ADP-sugar pyr        | Nudt5         |
| 24.10949 | 24.08537 | 23.6971  | Q9JLB0;E9PWC5                      | Q9JLB0                         | MAGUK p55 subfamily member 6                   | Mpp6          |
| NaN      | NaN      | NaN      | Q9JLQ0                             | Q9JLQ0                         | CD2-associated protein                         | Cd2ap         |
| 23.68646 | 23.89504 | 24.00196 | Q9QYY7                             | Q9QYY7                         | Endothelial cell-specific molecule 1           | Esm1          |
| 24.65403 | 24.94056 | 25.1946  | Q9QZ18;E9Q553;E9PY81               | Q9QZ18                         | Serine incorporator 1                          | Serinc1       |
| 23.04926 | NaN      | NaN      | Q9ROH0;A2A848                      | Q9ROH0;A2A848                  | Peroxisomal acyl-coenzyme A oxidase 1;Per      | Acox1         |
| 25.30313 | 24.97158 | 24.54628 | Q9WTP6;F7BP55                      | Q9WTP6                         | Adenylate kinase 2, mitochondrial              | Ak2           |
| 23.92252 | 24.04427 | 24.31008 | Q9WXT2                             | Q9WXT2                         | Interferon-inducible double-stranded RNA-d     | Prkra         |
| 25.73892 | 25.50142 | 25.38772 | Q9WU28;E9Q5Q8;E9Q093;H7BWX1;E9     | Q9WU28                         | Prefoldin subunit 5                            | Pfnd5         |
| NaN      | 21.74304 | NaN      | Q9Z0M5                             | Q9Z0M5                         | Lysosomal acid lipase/cholesteryl ester hydr   | Lipa          |
| 26.13907 | 26.18896 | 25.92931 | Q9Z0Y1;E9Q919                      | Q9Z0Y1;E9Q919                  | Dynactin subunit 3                             | Dctn3         |
| 24.42982 | 24.54038 | 24.67573 | Q9Z1J3;A6Q9RH3;F7CZD11;F6TXD3      | Q9Z1J3;A6Q9RH3                 | Cysteine desulfurase, mitochondrial            | Nfs1          |
| 23.76951 | 23.54038 | 23.76951 | Q9Z1K5;H7BWY7;H9KV21               | Q9Z1K5;H7BWY7;H9KV21           | E3 ubiquitin-protein ligase ARIH1              | Arih1         |
| 24.45513 | 23.64306 | 24.17188 | Q9Z1M2;AOA140LIF8                  | Q9Z1M2;AOA140LIF8              | Immunity-related GTPase family M member        | Irgm2         |
| 23.32389 | NaN      | 22.95127 | Q9Z1N5;G3UXI6                      | Q9Z1N5                         | Spliceosome RNA helicase Ddx39b                | Ddx39b        |
| 23.08861 | 24.86231 | 23.40406 | S4R189;Q3UPH7;S4R2U9               | S4R189;Q3UPH7;S4R2U9           | Rho guanine nucleotide exchange factor 40      | Arhgef40      |
| 23.82881 | 23.95837 | 24.00196 | S4R1L5;S4R2P8;O88738;REV_Q5NCS9    | S4R1L5;S4R2P8;O88738           | Baculoviral IAP repeat-containing protein 6    | Birc6         |
| 23.391   | 22.77555 | 22.68003 | Z4YK42;Q8C5H8                      | Z4YK42;Q8C5H8                  | NAD kinase 2, mitochondrial                    | Nadk2         |
| 23.08861 | 22.75735 | 23.29614 | AOA087WNN8;Q61263;AOA087WJS5       | AOA087WNN8;Q61263;AOA087W      | Sterol O-acyltransferase 1 (Fragment);Stero    | Soa1          |
| NaN      | NaN      | NaN      | AOA087WNZ7;G5E870;AOA087WRV6;AO    | AOA087WNZ7;G5E870;AOA087WR     | E3 ubiquitin-protein ligase TRIP12             | Trip12        |
| NaN      | 22.70978 | NaN      | AOA087WQ65;AOA087WRZ2;AOA087W      | AOA087WQ65;AOA087WRZ2;AOA087W  | Lymphocyte antigen 6E (Fragment)               | Ly6e          |
| 25.15653 | 24.84326 | 24.84326 | AOA087WR57;Q91XC8                  | AOA087WR57;Q91XC8              | Death-associated protein 1                     | Dap           |
| NaN      | 24.71293 | NaN      | AOA087WRB8;AOA087WPR7;AOA087W      | AOA087WRB8;AOA087WPR7;AOA087W  | Dystonin (Fragment);Dystonin                   | Dst           |
| NaN      | 22.95127 | 23.42982 | AOA0A6YW28;P35123;AOA0A6YVY7;Q9    | AOA0A6YW28;P35123;AOA0A6YV     | Ubiquitin carboxyl-terminal hydrolase 4        | Usp4          |
| NaN      | NaN      | NaN      | AOA0A6YWM5;E9QKE4;Q8BMG7           | AOA0A6YWM5;E9QKE4;Q8BMG7       | Rab3 GTPase-activating protein non-catalyti    | Rab3gap2      |
| 26.35616 | 27.1795  | 27.19835 | AOA0G2JE32;AOA0G2JGL0;P62838;P610  | AOA0G2JE32;AOA0G2JGL0          | Ubiquitin-conjugating enzyme E2 D3 (Fragm      | Ube2d3        |
| 26.44411 | 25.01052 | 23.29614 | AOA0G2JF44;Q9DAI2;AOA0H2UKB7;AOA   | AOA0G2JF44;Q9DAI2;AOA0H2UK     | Intraflagellar transport protein 22 homolog    | Ift22         |
| 23.23316 | NaN      | 22.82104 | AOA0G2JG35;AOA140T8T5;E9PZ43;P275  | AOA0G2JG35;AOA140T8T5          | Microtubule-associated protein (Fragment);     | Map4          |
| 24.87173 | 24.26069 | 23.32389 | AOA0J9YUN6;Q0VGU5;Q6TEK5           | AOA0J9YUN6;Q0VGU5;Q6TEK5       | Vitamin K epoxide reductase complex subun      | Vkorc11       |
| 22.96895 | NaN      | NaN      | AOA0J9YUR5;AOA0J9YUM4;AOA0J9YU6    | AOA0J9YUR5;AOA0J9YUM4          | C-terminal-binding protein 1 (Fragment);C-t    | Ctbp1         |
| NaN      | NaN      | 24.23169 | AOA0J9YV30;F8VQ28;Q8VI36           | AOA0J9YV30;F8VQ28;Q8VI36       | Paxillin                                       | Pxn           |
| NaN      | NaN      | NaN      | AOA0J9YVG0;Q61074                  | AOA0J9YVG0;Q61074              | Protein phosphatase 1G                         | Ppm1g         |
| 24.23169 | 24.45513 | 24.08537 | AOA0N4SUH8;Q9QZ23;D3Z285           | AOA0N4SUH8;Q9QZ23;D3Z285       | NFU1 iron-sulfur cluster scaffold homolog, n   | Nfu1          |
| 24.74919 | 24.53445 | 24.49838 | AOA0N4SWD0;Q9CZC8                  | AOA0N4SWD0;Q9CZC8              | Secernin-1 (Fragment);Secernin-1               | Scrn1         |
| NaN      | NaN      | NaN      | AOA0R4J097;O88393                  | AOA0R4J097;O88393              | Transforming growth factor beta receptor ty    | Tgfb3         |
| NaN      | NaN      | NaN      | AOA0R4J0T5;P28659;S4R257;AOA0R4J2  | AOA0R4J0T5;P28659;S4R257       | CUG triplet repeat, RNA binding protein 1, is  | Celf1         |
| NaN      | NaN      | NaN      | AOA0R4J126;Q8BS03                  | AOA0R4J126;Q8BS03              | Peptidase inhibitor 15                         | Pi15          |
| NaN      | NaN      | 23.03086 | AOA0R4J139;D3YUC9;Q8BU85           | AOA0R4J139;D3YUC9;Q8BU85       | Methionine sulfoxide reductase B3;Methion      | Msrb3         |
| 23.95837 | NaN      | 23.51653 | AOA0R4J173;G5E8C4;Q8BRH0           | AOA0R4J173;G5E8C4;Q8BRH0       | Transmembrane and TPR repeat-containing        | Tmtc3         |
| 21.75532 | NaN      | NaN      | AOA0R4J196;F8WH31;E9PUD1;Q58A65    | AOA0R4J196;F8WH31;E9PUD1       | C-Jun-amino-terminal kinase-interacting pro    | Spag9         |
| 23.89504 | 23.60964 | 24.31008 | AOA0R4J233;AOA1W2P6J7;Q8C650       | AOA0R4J233;AOA1W2P6J7          | Septin-10                                      | Sept10        |
| 22.63423 | 22.47011 | 24.06907 | AOA0R4J275;Q7TMF3                  | AOA0R4J275;Q7TMF3              | NADH dehydrogenase [ubiquinone] 1 alpha        | Ndufa12       |
| 24.45513 | NaN      | NaN      | AOA140LHY2;Q7TMR0                  | AOA140LHY2;Q7TMR0              | Lysosomal Pro-X carboxypeptidase               | Prcp          |
| 23.37782 | 23.31008 | 23.78955 | AOA140LIJ2;AOA140LJ29;AOA140LIQ6;E | AOA140LIJ2;AOA140LJ29;AOA140LI | Transforming acidic coiled-coil-containing pr  | Tacc2         |
| 25.73635 | 25.69445 | 25.60399 | AOA140T8J4;Q9R257                  | AOA140T8J4;Q9R257              | Heme-binding protein 1                         | Hebp1         |
| 23.391   | 23.42982 | 23.50446 | AOA1D5RLY2;Q80WQ2                  | AOA1D5RLY2;Q80WQ2              | Protein VAC14 homolog                          | Vac14         |
| 26.00838 | 26.00838 | 26.4008  | AOA1L1SRJ4;Q9QY33;AOA1L1SQ19       | AOA1L1SRJ4;Q9QY33;AOA1L1SR     | Tetraspanin;Tetraspanin-3;Tetraspanin (Frag    | Tspan3        |
| NaN      | NaN      | 24.14102 | AOA1L1SRR1;Q9ESD6                  | AOA1L1SRR1;Q9ESD6              | CKLF-like MARVEL transmembrane domain-         | Ube3m7        |
| 23.26785 | 23.65403 | 23.40406 | AOA1L1SS10;Q9Z2X8                  | AOA1L1SS10;Q9Z2X8              | Kelch-like ECH-associated protein 1            | Keap1         |
| 22.39624 | 22.63201 | 22.54038 | AOA1L1STF0;Q6PD16                  | AOA1L1STF0;Q6PD16              | Ubiquitin carboxyl-terminal hydrolase MIND     | Mindy2        |
| NaN      | NaN      | NaN      | AOA1N9M4K1;AOA1L1SU77;P70665;AOA   | AOA1N9M4K1;AOA1L1SU77          | Sialate O-acetyltransferase                    | Siae          |
| NaN      | NaN      | NaN      | AOA1W2P7L7;P59708                  | AOA1W2P7L7;P59708              | Splicing factor 3B subunit 6 (Fragment);Splic  | Sf3b6         |
| 23.94056 | 24.2021  | 23.94056 | AOA1W2P7Z1;Q8VHI3;AOA1W2P6H4       | AOA1W2P7Z1;Q8VHI3;AOA1W2P6H    | GDP-fucose protein O-fucosyltransferase 2      | Pofut2        |
| 22.93335 | 22.87267 | 22.8839  | AOA1W2P8A8;Q99KK1                  | AOA1W2P8A8;Q99KK1              | Receptor expression-enhancing protein;Recep    | Reep3         |
| NaN      | NaN      | NaN      | AOA1Y7VKX7;F8WJA0;Q9ESV0;AOA1Y7V   | AOA1Y7VKX7;F8WJA0;Q9ESV0       | ATP-dependent RNA helicase DDX24               | Ddx24         |
| NaN      | NaN      | NaN      | AOA1Y7VLW2;W4VSP4;F7B9A0;O08804    | AOA1Y7VLW2;W4VSP4;F7B9A0       | Serine (or cysteine) peptidase inhibitor, clad | Serpinb6c     |
| 25.30313 | 24.30313 | 25.96499 | AOA1Y7VMA0;AOA1Y7VL95;Q9JJ75       | AOA1Y7VMA0;AOA1Y7VL95          | Ribosylidihydrocinotamid dehydrogenase         | Nqo2          |
| 24.05258 | NaN      | NaN      | AOA1Y7VNI1;G3X9B1                  | AOA1Y7VNI1;G3X9B1              | HEAT repeat-containing 1 (Fragment);HEAT       | Heatr1        |
| NaN      | NaN      | NaN      | A2A5V3;A2A5V2;S4R2D3;P55194;S4R2D  | A2A5V3;A2A5V2;S4R2D3           | SH3 domain-binding protein 1                   | Sh3bp1        |
| 22.32113 | 22.31562 | 22.11108 | A2AA71;Q3U2P1                      | A2AA71;Q3U2P1                  | Protein transport protein Sec24A               | Sec24a        |
| 24.53445 | 24.317   | NaN      | A2ACM0;Q8K4Q0                      | A2ACM0;Q8K4Q0                  | Putative uncharacterized protein;Regulatory    | Rctor         |
| 24.44253 | 24.51653 | 24.42982 | A2ADY9                             | A2ADY9                         | Protein DD11 homolog 2                         | Ddi2          |
| 24.44253 | NaN      | 22.51893 | A2AE27;Q9DBT5                      | A2AE27;Q9DBT5                  | AMP deaminase;AMP deaminase 2                  | Ampd2         |
| 23.71816 | 23.63201 | 24.05258 | A2AF67;A2AF47                      | A2AF67;A2AF47                  | Dedicator of cytokinesis protein 11            | Dock11        |
| 23.40406 | NaN      | NaN      | A2AGA4                             | A2AGA4                         | Rhomboid-related protein 2                     | Rhbd12        |
| 23.60964 | 23.92252 | 23.49228 | A2AJ72;Q3TIX6;AOA0A6YV5;AOA0A6Y    | A2AJ72;Q3TIX6;AOA0A6YV5        | Far upstream element (FUSE)-binding protei     | Fubp3         |
| 25.22435 | NaN      | 24.01052 | A2AM65;Z4YKA3;Z4YKB8;Q3TEA8        | A2AM65;Z4YKA3;Z4YKB8           | Heterochromatin protein 1-binding protein      | Hp1bp3        |
| 23.65403 | 25.79699 | 25.54333 | A2AMC3;Q3UXG7;Q91ZW2;E9PZ15;E9C    | A2AMC3;Q3UXG7;Q91ZW2           | GDP-fucose protein O-fucosyltransferase 1      | Pofut1        |
| 26.60399 | 27.43141 | 27.20769 | A2AM17;Z4YK4C;AOA0R4J112;A2AM12;A  | A2AM17;Z4YK4C;AOA0R4J112       | Eukaryotic translation initiation factor 4 gam | Eif4g3        |
| NaN      | NaN      | NaN      | A2AMQ5;Q99L43;Q6PBC0;F654G2        | A2AMQ5;Q99L43;Q6PBC0           | Phosphatidate cytidyllyltransferase;Phospha    | Cds2          |
| 23.15653 | 23.10789 | 22.72442 | A2AQE2;Q6A098                      | A2AQE2;Q6A098                  | SECIS binding protein 2-like;Selenocysteine    | Siscsbp2l     |
| NaN      | 22.03255 | NaN      | A2ARZ7;P35285                      | A2ARZ7;P35285                  | RAB22A, member RAS oncogene family, isofo      | Rab22a        |
| 25.68378 | 25.79699 | 26.16806 | A2AT18;A2AT16;A2AT19;Q99JX3        | A2AT18;A2AT16;A2AT19;Q99       | Golgi reassembly-stacking protein 2;Golgi re   | Gorasp2       |
| NaN      | NaN      | NaN      | A2ATU9;Q8BY71                      | A2ATU9;Q8BY71                  | Histone acetyltransferase type B catalytic su  | Hat1          |
| NaN      | NaN      | NaN      | A2AUM6;P16254                      | A2AUM6;P16254                  | Signal recognition particle 14 kDa protein     | Srp14         |
| NaN      | NaN      | NaN      | A2AW05;Q08943                      | A2AW05;Q08943                  | FACT complex subunit SSRP1 (Fragment);FA       | Ssrp1         |
| NaN      | NaN      | NaN      | A3KGB4                             | A3KGB4                         | TBC1 domain family member 8B                   | Tbc1d8b       |

|          |          |          |                                   |                             |                                                 |                |
|----------|----------|----------|-----------------------------------|-----------------------------|-------------------------------------------------|----------------|
| 23.1991  | 22.92976 | 21.86136 | A6H5Z3                            | A6H5Z3                      | Exocyst complex component 6B                    | Exoc6b         |
| 26.26964 | 26.34604 | 26.18329 | A6PW55                            | A6PW55                      | Gelsolin (Fragment)                             | Gsn            |
| 23.02918 | 22.36986 | 22.69922 | B1ARW4;Q99LY9                     | B1ARW4;Q99LY9               | NADH dehydrogenase [ubiquinone] iron-sulfur     | Ndufs5         |
| 22.5708  | 22.2006  | NaN      | B1AU74;Q9CWP6                     | B1AU74;Q9CWP6               | Motile sperm domain-containing protein 2        | Mospd2         |
| 25.63478 | 25.91342 | 25.92705 | B1AV14;Q78IK4                     | B1AV14;Q78IK4               | MICOS complex subunit;MICOS complex sub         | Apool          |
| NaN      | 21.2535  | 22.04593 | B1AXY5;P15535                     | B1AXY5;P15535               | Beta-1,4-galactosyltransferase 1                | B4gal1         |
| 27.63201 | 27.78955 | 27.81421 | B1AYG7;B1AYG6;Q9Z0T9              | B1AYG7;B1AYG6;Q9Z0T9        | Integrin beta (Fragment);Integrin beta;Integ    | Itgb6          |
| NaN      | NaN      | NaN      | B1AZ26;B1AZ15;B1AZ14;Q3UMF0       | B1AZ26;B1AZ15;B1AZ14;Q3UMF0 | Cordon-bleu protein-like 1 (Fragment);Cord      | Cobl1;C        |
| 24.10149 | 24.57542 | 24.32389 | B1AZ42;P0COA3;B1AZ41              | B1AZ42;P0COA3;B1AZ41        | Charged multivesicular body protein 6 (Frag     | Chmp6          |
| NaN      | NaN      | NaN      | B1B1A8;Q6PDN3                     | B1B1A8;Q6PDN3               | Myosin light chain kinase, smooth muscle        | Mylk           |
| 26.13124 | 25.54038 | NaN      | B2RXA1                            | B2RXA1                      | PI-PLC X domain-containing protein 2            | Plcxd2         |
| 23.18556 | 22.67573 | 23.36453 | B7ZWM8;B2RXP1;E9QAU9;Q8BVU0       | B7ZWM8;B2RXP1;E9QAU9        | Leucine-rich repeat and calponin homology       | Lrch3          |
| 24.34435 | 24.15653 | 24.417   | D3YTS4;Q9JHS3                     | D3YTS4;Q9JHS3               | Ragulator complex protein LAMTOR2               | Lamtor2        |
| 22.15499 | 22.23608 | 22.40406 | D3YU1P1;Q9WVG6                    | D3YU1P1;Q9WVG6              | Histone-arginine methyltransferase CARM1        | Carm1          |
| 22.57311 | 22.32663 | 23.20955 | D3YUUI4;Q61124;D3Z448;Q6PAH4      | D3YUUI4;Q61124;D3Z448;      | Battenin (Fragment);Battenin                    | Cln3           |
| 23.1008  | 23.45513 | 23.28207 | D3YVN5;D3YVM9;Q9JJS0;Q68EF9;A2A4  | D3YVN5;D3YVM9;Q9JJS0;       | Signal peptide, CUB and EGF-like domain-co      | Scube2         |
| 23.21095 | 24.02749 | 23.86703 | D3YW20;D3YW19;I1E4X5;Q8BWQ6       | D3YW20;D3YW19;I1E4X5;       | RIKEN cDNA 9030624J02 gene (Fragment)           | 9030624J02Rik  |
| 23.46762 | 23.37782 | NaN      | D3YWD1;J3QQ16;A0A087WS16;E9PW0    | D3YWD1;J3QQ16;A0A087        | Collagen, type VI, alpha 3 (Fragment);Collag    | Col6a3         |
| 24.98902 | 25.28912 | 25.26428 | D3YWT0;D3Z569;D3YTS1;Q9R0P6       | D3YWT0;D3Z569;D3YTS1;       | Signal peptidase complex catalytic subunit 5    | Sec11a         |
| 23.13477 | 22.9061  | 23.21549 | D3YWU4;D3YW49;D3YTR6;Q8ROG7;D6    | D3YWU4;D3YW49;D3YTR         | Protein spinster homolog 1 (Fragment);Prot      | Spms1;Spn      |
| 23.66492 | 23.83846 | 24.01903 | D3YXP6;Q9D1G2                     | D3YXP6;Q9D1G2               | Phosphomevalonate kinase                        | Pmkv           |
| 23.72858 | 23.65403 | NaN      | D3YXZ3;Q91YS4;O88448;D3Z5Y7       | D3YXZ3;Q91YS4;O88448        | Kinesin light chain 2                           | Klc2           |
| NaN      | 23.26785 | 23.5285  | D3YYT0;P15116                     | D3YYT0;P15116               | Cadherin-2                                      | Cdh2           |
| NaN      | NaN      | 23.60964 | D3YZP9                            | D3YZP9                      | Coiled-coil domain-containing protein 6         | Ccd6           |
| 23.37782 | NaN      | 24.66492 | D3Z0V2;A0A0R4I0X8;Q9ES28          | D3Z0V2;A0A0R4I0X8;Q9E       | Rho guanine nucleotide exchange factor 7 (F     | Arhgef7        |
| 22.18858 | NaN      | 22.06579 | D3Z101;S4R1X1;Q7TMQ7              | D3Z101;S4R1X1;Q7TMQ7        | WD repeat-containing protein 91 (Fragment)      | Wdr91          |
| NaN      | NaN      | 23.33756 | D3Z1Y5;Q8BL80                     | D3Z1Y5;Q8BL80               | Rho GTPase-activating protein 22                | Arhgap22       |
| 23.68646 | 24.08537 | 23.72858 | D3Z3J6;G3UYE5;F6Y616;Q8VE62;G3UZ6 | D3Z3J6;G3UYE5;F6Y616;Q      | Polyadenylate-binding protein-interacting p     | Paip1          |
| 23.88577 | 24.01903 | 23.79947 | D3Z3L3;D3YU4;E9PV98               | D3Z3L3;D3YU4;E9PV98         | Tripartite motif-containing 12C;Tripartite m    | Trim12c;Trim5; |
| NaN      | NaN      | 21.98815 | D3Z3T5;P49586;Q811Q9              | D3Z3T5;P49586;Q811Q9        | Choline-phosphate cytidyltransferase A          | Pcvt1a         |
| 25.34096 | 25.27142 | 25.04843 | D3Z3X4;Q9CQB5                     | D3Z3X4;Q9CQB5               | CDGSH iron-sulfur domain-containing protei      | Cisd2          |
| 23.63201 | 24.84326 | 24.21697 | D3Z4B2;Q9CWZ7                     | D3Z4B2;Q9CWZ7               | Gamma-soluble NSF attachment protein (Frag      | Napg           |
| 25.02749 | 25.01478 | 25.01903 | D3Z6D5;Q6TYB5                     | D3Z6D5;Q6TYB5               | Fasciculation and elongation protein zeta-2     | Fez2           |
| 23.15499 | 22.71607 | 24.05258 | D3Z6I4;Q921W4;D3YU21;F7BGV1;D3YZ  | D3Z6I4;Q921W4;D3YU21;       | Crystallin, zeta (Quinone reductase)-like 1, is | Cryz1          |
| 23.62087 | 23.48001 | 23.20508 | D3Z7F0;P16125;A0A0N4SVV8          | D3Z7F0;P16125;A0A0N4S       | L-lactate dehydrogenase (Fragment);L-lactat     | Ldhb           |
| 26.33926 | 26.31008 | 26.75175 | D6RFN5;D3YW25;O70131              | D6RFN5;D3YW25;O70131        | Ninjurin-1;Ninjurin 1, isoform CRA_a            | Ninj1          |
| 24.06907 | 24.67573 | 24.33756 | D6RI20;Q9CR20                     | D6RI20;Q9CR20               | Haloacid dehalogenase-like hydrolase doma       | Hhdh2;ler3ip1  |
| NaN      | NaN      | NaN      | E0CX20                            | E0CX20                      | Protein BUD31 homolog                           | Bud31          |
| 28.86821 | 28.87994 | 29.42942 | E0CYE2;F7DEU6;P50096;E0CXK0       | E0CYE2;F7DEU6;P50096;E      | Inosine-5-monophosphate dehydrogenase           | Impdh1         |
| 24.02749 | 23.84805 | 24.27498 | E0CYH4;Q8C6G8;F7DFQ2              | E0CYH4;Q8C6G8;F7DFQ2        | WD repeat-containing protein 26;WD repea        | Wdr26          |
| 29.10649 | 28.00838 | 27.65267 | E9PU87;F6U8X4;F6U6U5;F6S7W6;Q6PA  | E9PU87;F6U8X4;F6U6U5;       | Serine/threonine-protein kinase SIK3;Serine     | SIK3           |
| 23.2535  | NaN      | NaN      | E9PUE7;Q5SSL4;H3BJY3;Q6PAJ1       | E9PUE7;Q5SSL4;H3BJY3;Q      | Active breakpoint cluster region-related pro    | Abr            |
| 22.96543 | NaN      | 23.19009 | E9PUW7;Q9EPK7                     | E9PUW7;Q9EPK7               | Exportin-7                                      | Xpo7           |
| 25.48001 | 25.83364 | 25.72338 | E9PVN6;Q9CR63;Q9D6K5              | E9PVN6;Q9CR63;Q9D6K5        | Predicted gene 20498;Cytochrome c oxidase       | Gm20498;Cox1I  |
| 23.42982 | NaN      | NaN      | E9PW03;Q9WTK3;E9QA52;F6T7Y8       | E9PW03;Q9WTK3;E9QA52        | Glycosylphosphatidylinositol anchor attach      | Gpaa1          |
| 24.1946  | 24.22435 | 24.22435 | E9PWW2;Q921T2                     | E9PWW2;Q921T2               | Torsin-1A-interacting protein 1                 | Tor1aip1       |
| 23.74919 | 23.74919 | 23.40406 | E9PY51;A0A286YCX6;E9PWG2;A0A286Y  | E9PY51;A0A286YCX6;E9PW      | Trafficking protein particle complex 8          | Trappc8        |
| NaN      | NaN      | NaN      | E9PZ54;Q9D0T1                     | E9PZ54;Q9D0T1               | NHP2-like protein 1                             | Snu13          |
| NaN      | 22.82881 | 23.00539 | E9Q0T0;G5E8W7;F6SPQ1;O35448;E9PQ  | E9Q0T0;G5E8W7;F6SPQ1;       | Lysosomal thioesterase PPT2 (Fragment)          | Ppt2           |
| 23.70767 | 23.76951 | 24.44253 | E9Q0U3;D3Z7P0;Q8K3W0;A0A0J9YV56   | E9Q0U3;D3Z7P0;Q8K3W0        | BRIS and BRCA1-A complex member 2               | Babam2         |
| 22.75532 | 22.53326 | 22.25926 | E9Q1T3;E9PX30;Q8BPM2              | E9Q1T3;E9PX30;Q8BPM2        | Mitogen-activated protein kinase kinase kin     | Map4k5         |
| NaN      | 23.02073 | 22.85567 | E9Q2R3;Q9EQN9                     | E9Q2R3;Q9EQN9               | Thiamine transporter 1                          | Slc19a2        |
| 22.76344 | 22.29053 | 22.75939 | E9Q467;E9Q236                     | E9Q467;E9Q236               | ATP-binding cassette, sub-family C (CFTR/M      | Abcc4          |
| 24.11744 | 24.15653 | 24.18707 | E9Q481;Q6P2K6                     | E9Q481;Q6P2K6               | Serine/threonine-protein phosphatase 4 reg      | Ppp4r3a        |
| 23.16269 | NaN      | NaN      | E9Q4K7;A0A286YCV9                 | E9Q4K7;A0A286YCV9           | Kinesin family member 13B                       | Kif13b         |
| NaN      | 26.71293 | NaN      | E9Q4K9;E9PYU8;Q9CUN6;A2A526;A0A   | E9Q4K9;E9PYU8;Q9CUN6;       | E3 ubiquitin-protein ligase;E3 ubiquitin-prot   | Smurf1;Smu     |
| NaN      | 23.97596 | NaN      | E9Q4T8;Q9JLV5                     | E9Q4T8;Q9JLV5               | Cullin-3                                        | Cul3           |
| NaN      | NaN      | NaN      | E9Q5B5;O08528                     | E9Q5B5;O08528               | Hexokinase-2                                    | Hk2            |
| NaN      | NaN      | NaN      | E9Q5E3;Q6NZR1;P28047              | E9Q5E3;Q6NZR1;P28047        | Protein Wnt;Protein Wnt-7b                      | Wnt7b          |
| NaN      | NaN      | NaN      | E9Q5J9                            | E9Q5J9                      | Tropomyosin alpha-3 chain                       | Tpm3           |
| 24.28912 | NaN      | 24.08537 | E9Q7B0                            | E9Q7B0                      | Prolyl 4-hydroxylase subunit alpha-1            | P4ha1          |
| 25.44884 | 25.45199 | 26.33586 | E9Q8N1;E9Q8K5;A2ASS6              | E9Q8N1;E9Q8K5;A2ASS6        | Titin                                           | Ttn            |
| 24.76951 | 24.36453 | 24.38443 | E9Q9C5;P63082;D3Z3B2              | E9Q9C5;P63082;D3Z3B2        | V-type proton ATPase proteolipid subunit (F     | Atp6v0c        |
| NaN      | NaN      | NaN      | E9Q9H2;E9Q9H3;P54103;Q3TRX6       | E9Q9H2;E9Q9H3;P54103;       | DnaJ homolog subfamily C member 2               | Dnajc2         |
| 24.33756 | 24.48616 | 24.38443 | E9QAN4;G3UW47;Q6TA13;E9Q9G6;A0    | E9QAN4;G3UW47;Q6TA13        | Kinesin-like protein KIF1A;Kinesin family me    | Kif1a          |
| 21.96367 | 21.73892 | NaN      | E9QAT0;D3Z6U8;E9QNF5;Q6AXB7;P359  | E9QAT0;D3Z6U8;E9QNF5;       | Synaptic functional regulator FMR1              | Fmr1           |
| 24.10949 | 23.55215 | 24.14102 | E9QKK8;F6Q8D3;Q9QZW0              | E9QKK8;F6Q8D3;Q9QZW0        | Phospholipid-transporting ATPase;Phosphol       | Atp11c         |
| 24.72338 | 24.33756 | 24.47383 | E9QM7H;Q9DBZ1                     | E9QM7H;Q9DBZ1               | Inhibitor of nuclear factor kappa-B kinase-in   | Ikbip          |
| NaN      | 21.0426  | NaN      | E9QMQ3;Q99KW3                     | E9QMQ3;Q99KW3               | TRIO and F-actin-binding protein                | Triobp         |
| NaN      | NaN      | NaN      | E9QN31;Q922K7                     | E9QN31;Q922K7               | Probable 28S rRNA (cytosine-(C5))-methyltr      | Nop2           |
| 24.14102 | NaN      | 23.21104 | E9QQ96;Z4YJE4;H7BX05;A2AAJ9;A0A1V | E9QQ96;Z4YJE4;H7BX05;A      | Obscurin                                        | Obscn;O        |
| 23.49228 | 23.73892 | 23.32389 | F2Z4B7;G5E867;F2Z3U3;F2Z3X7       | F2Z4B7;G5E867;F2Z3U3;F      | Ras association (RalGDS/AF-6) and pleckstrin    | Raph1          |
| 23.20658 | NaN      | NaN      | F6QH25;E9Q4G8;E9Q3Q6;Q61490       | F6QH25;E9Q4G8;E9Q3Q6;       | CD166 antigen (Fragment);CD166 antigen          | Alcam          |
| 23.68646 | NaN      | 22.52612 | F6R220;Q3T2M9                     | F6R220;Q3T2M9               | GDP-Man:Man(3)GlcNAc(2)-PP-Dol alpha-1,         | Alg11          |
| NaN      | 23.87643 | NaN      | F6RCU2;D3Z3M7;D3Z2Z1;F8WIA1;Q922  | F6RCU2;D3Z3M7;D3Z2Z1;       | CAP-Gly domain-containing linker protein 1      | Clip1          |
| NaN      | 23.94949 | NaN      | F6SD17;Q810S1                     | F6SD17;Q810S1               | Calcium uniporter regulatory subunit MCUb       | Mcub           |
| 25.1332  | 25.28912 | 25.21697 | F6VF29;Q91V10;G5E8U9;O54940;Q8BH  | F6VF29;Q91V10;G5E8U9;Q      | BCL2/adenovirus E1B 19 kDa protein-interac      | Bnip2          |
| NaN      | NaN      | NaN      | F6XC25;Q8BRN9                     | F6XC25;Q8BRN9               | Coiled-coil and c2 domain-containing protei     | Cc2d1b         |
| 22.43237 | 22.66058 | 22.82104 | F6ZK23;Q9R112                     | F6ZK23;Q9R112               | Sulfide:quinone oxidoreductase, mitochond       | Sqor           |
| 23.28207 | 22.98815 | 23.18101 | F7ARZ1;Q3TI14;Q8VE22;A7M7Q8       | F7ARZ1;Q3TI14;Q8VE22;A      | 28S ribosomal protein S23, mitochondrial (F     | Mrsps23        |
| NaN      | 21.79551 | NaN      | F8VPK0                            | F8VPK0                      | Tetratricopeptide repeat domain 37              | Ttc37          |
| 22.11426 | 22.40925 | NaN      | F8VPX1;E9PXY8;Q6A4J8              | F8VPX1;E9PXY8;Q6A4J8        | Ubiquitin carboxyl-terminal hydrolase 7         | Ucp7           |
| 26.23535 | 26.21327 | 26.23169 | F8WHP8;P56135                     | F8WHP8;P56135               | ATP synthase subunit f, mitochondrial           | Atp5f2         |
| NaN      | NaN      | NaN      | F8WHU5;Q4VA53                     | F8WHU5;Q4VA53               | Sister chromatid cohesion protein PDSS5 hom     | Pds5b          |
| 23.37782 | 23.44253 | 23.18707 | F8WI14;D3YV64;D3Z772              | F8WI14                      | Extracellular matrix protein 1                  | Ecm1           |
| 27.4073  | 26.93157 | 27.3662  | F8WID5;B7ZNL3                     | F8WID5;B7ZNL3               | Tropomyosin alpha-1 chain;Tpm1 protein          | Tpm1           |
| 25.59263 | 25.71293 | 25.64306 | F8WJ43;P46662;F7DBY2              | F8WJ43;P46662;F7DBY2        | Merlin (Fragment);Merlin                        | Nf2            |
| NaN      | NaN      | NaN      | G3UUVU2;D3Z5A6;D3YVW09;Q62203     | G3UUVU2;D3Z5A6;D3YVW09      | Splicing factor 3A subunit 2;Splicing factor 3  | Sf3a2          |

|          |          |          |                                   |                        |                                                |               |
|----------|----------|----------|-----------------------------------|------------------------|------------------------------------------------|---------------|
| 25.239   | 25.07316 | 25.1946  | G3UW70;Q9D1L9                     | G3UW70;Q9D1L9          | MCG21719;Regulator complex protein LAM         | Lamtors5      |
| 25.79203 | 25.74919 | 26.06702 | G3UYF9;Q03958                     | G3UYF9;Q03958          | Prefoldin subunit 6                            | Pfdn6         |
| NaN      | NaN      | NaN      | G3UZJ3;G3UXK0;G3UY34;Q8K0N0;Q8C   | G3UZJ3;G3UXK0;G3UY34;  | Dystrobrevin beta;Dystrobrevin                 | Dtnb          |
| NaN      | NaN      | NaN      | G3X8U3                            | G3X8U3                 | MCG6895                                        | 2210016F16Rik |
| 24.27498 | 24.54038 | 24.58692 | G3X8W7;A0A0R4J1W7;Q8BGZ4          | G3X8W7;A0A0R4J1W7;Q8   | CDC23 (Cell division cycle 23, yeast, homolog  | Cdc23         |
| NaN      | NaN      | NaN      | G3X8Y7;O88561;F7CPA3              | G3X8Y7;O88561;F7CPA3   | Long-chain fatty acid transport protein 3      | Slc27a3       |
| 23.49228 | 23.40406 | 23.44253 | G5E884                            | G5E884                 | Serine/threonine-protein kinase PAK 1          | Pak1          |
| NaN      | NaN      | NaN      | G5E898;Q9R269                     | G5E898;Q9R269          | Periplakin                                     | Ppl           |
| 23.98468 | 24.18707 | 23.78955 | G5E8C3;Q8BHL4                     | G5E8C3;Q8BHL4          | G protein-coupled receptor, family C, group    | Gprc5a        |
| 23.94056 | 24.33756 | 23.85757 | G8JL35;E0CYJ0;E0CXA9;Q6PEB6       | G8JL35;E0CYJ0;E0CXA9;Q | MOB-like protein phocein (Fragment);MOB-       | Mob4;         |
| 23.32389 | NaN      | NaN      | G8JL76;D3Z636;Q91VM9              | G8JL76;D3Z636;Q91VM9   | Inorganic pyrophosphatase 2, mitochondrial     | Ppa2          |
| 23.90426 | 24.02749 | 24.57542 | H3BJ37;Q8BIG7                     | H3BJ37;Q8BIG7          | Catechol O-methyltransferase domain-conta      | Comtd1        |
| 24.21697 | 24.37782 | 25.48308 | H3BKD4;H3BKE6;E9QM17;E9QM17;H3B   | H3BKD4;H3BKE6;E9QM17;  | Arf-GAP with SH3 domain, ANK repeat and        | Asap1         |
| NaN      | NaN      | NaN      | H3BKW0;H3BJ30;H3BJW3;Q6NVF9       | H3BKW0;H3BJ30;H3BJW3   | Cleavage and polyadenylation-specificity fac   | Cpsf6         |
| 26.78955 | 26.49686 | 26.4008  | H3BKY1;H9H9R4;Q9JH3               | H3BKY1;H9H9R4;Q9JH3    | Glycosylated lysosomal membrane protein        | Glmp          |
| 24.18707 | NaN      | NaN      | H7BWW2;Q9JKC8;D6RI63;D3YVU3;D3Y   | H7BWW2;Q9JKC8;D6RI63;  | AP-3 complex subunit mu-1                      | Ap3m1         |
| 26.01265 | 25.96719 | 25.90426 | H7BX38;P40224                     | H7BX38;P40224          | Stromal cell-derived factor 1                  | Cxcl12        |
| NaN      | NaN      | NaN      | H7BX44;D3YYN8;E9PVY0;A0A1D5RLQ9;  | H7BX44;D3YYN8;E9PVY0;  | Serine/threonine-protein kinase MRCK alpha     | Cdc42bpa      |
| 23.97596 | 23.46762 | 23.93157 | J3QJX3;Q9Z2G6                     | J3QJX3;Q9Z2G6          | Protein sel-1 homolog 1                        | Sel1          |
| 23.79947 | 24.1332  | 23.72858 | J3QN51;J3QPT3;BOLM42;F7BGR7;E9QL  | J3QN51;J3QPT3;BOLM42;F | MCG8382, isoform CRA_d;RNA-binding prot        | Trapp2;Rbm1   |
| 23.49228 | 24.32389 | 23.79947 | J3QN85;P16092;A0A0J9YTQ5;Q61563;J | J3QN85;P16092;A0A0J9Y  | Fibroblast growth factor receptor;Fibroblast   | Fgfr1         |
| 24.26069 | 24.49228 | 24.2021  | J3QP56;P97823;J3QQ63;D3Z269;D3YU  | J3QP56;P97823;J3QQ63;D | Acyl-protein thioesterase 1                    | Lypla1        |
| 22.10789 | 22.21252 | 21.24191 | K4DI77;Q5ND34;F6XD87              | K4DI77;Q5ND34;F6XD87   | WD repeat-containing protein 81 (Fragment      | Wdr81         |
| 22.15808 | 22.41183 | 22.31838 | M9MMK0;Q62177                     | M9MMK0;Q62177          | Semaphorin-3B                                  | Sema3b        |
| 23.23462 | NaN      | NaN      | O08796                            | O08796                 | Eukaryotic elongation factor 2 kinase          | Eef2k         |
| 24.12534 | 24.391   | 24.08537 | O08848                            | O08848                 | 60 kDa SS-A/Ro ribonucleoprotein               | Trove2        |
| NaN      | NaN      | NaN      | O09174                            | O09174                 | Alpha-methylacyl-CoA racemase                  | Amacr         |
| 23.239   | 22.97771 | 23.01903 | O35127                            | O35127                 | Protein C10                                    | Grc10         |
| 24.43619 | 24.26785 | 24.72858 | O35405                            | O35405                 | Phospholipase D3                               | Pld3          |
| NaN      | NaN      | NaN      | O35465;F6WFP10                    | O35465;F6WFP10         | Peptidyl-prolyl cis-trans isomerase FKBP8;P    | Fkbp8         |
| 23.88577 | 24.88577 | 24.47383 | O35704                            | O35704                 | Serine palmitoyltransferase 1                  | Sptlc1        |
| 23.68646 | 24.15653 | 24.06085 | O35864;A0A087WQA8                 | O35864;A0A087WQA8      | COP9 signalosome complex subunit 5;COP9        | Cops5         |
| 25.00196 | 24.97596 | 25.02749 | O55013                            | O55013                 | Trafficking protein particle complex subunit   | Trappc3       |
| NaN      | NaN      | NaN      | O70421                            | O70421                 | Frizzled-1                                     | Fzd1          |
| 23.40406 | 23.29614 | 23.23023 | O88441                            | O88441                 | Metaxin-2                                      | Mtx2          |
| 26.55215 | 26.61807 | 26.53445 | P03930                            | P03930                 | ATP synthase protein 8                         | Mtatp8        |
| 23.60964 | 24.06907 | 23.60964 | P04925                            | P04925                 | Major prion protein                            | Prnp          |
| 24.32389 | 24.51051 | 24.58692 | P05132                            | P05132                 | cAMP-dependent protein kinase catalytic su     | Prkaca        |
| NaN      | NaN      | NaN      | P05533                            | P05533                 | Lymphocyte antigen 6A-2/G6-1                   | Ly6a          |
| 25.1795  | 25.12139 | 25.41054 | P09041                            | P09041                 | Phosphoglycerate kinase 2                      | Pgk2          |
| 22.95837 | 23.33756 | 23.55215 | P09470;F6QCP8                     | P09470;F6QCP8          | Angiotensin-converting enzyme;Angiotensin      | Ace           |
| 23.93157 | 23.75939 | 23.88577 | P14719;G3UYU3                     | P14719;G3UYU3          | Interleukin-1 receptor-like 1;Interleukin-1 re | Il1r1         |
| 26.2589  | 26.32903 | NaN      | P17665                            | P17665                 | Cytochrome c oxidase subunit 7C, mitochon      | Cox7c         |
| 24.26069 | 24.18707 | 24.72858 | P18155                            | P18155                 | Bifunctional methylenetetrahydrofolate deh     | Mthfd2        |
| NaN      | NaN      | NaN      | P18608;D3Z607                     | P18608;D3Z607          | Non-histone chromosomal protein HMG-14         | Hmgn1         |
| NaN      | 23.25061 | 23.35111 | P22935                            | P22935                 | Cellular retinoic acid-binding protein 2       | Crabp2        |
| 25.72858 | 26.2021  | 25.80931 | P24604;Q8CFK4;Q3U436              | P24604;Q8CFK4;Q3U436   | Tyrosine-protein kinase Tec;Tyrosine-protein   | Tec           |
| NaN      | 25.68378 | NaN      | P26450;Q80U15                     | P26450;Q80U15          | Phosphatidylinositol 3-kinase regulatory sub   | Pik3r1        |
| NaN      | NaN      | NaN      | P27661                            | P27661                 | Histone H2AX                                   | H2afx         |
| 24.52253 | 25.00196 | 25.02749 | P28481                            | P28481                 | Collagen alpha-1(II) chain                     | Col2a1        |
| 24.77455 | 24.89966 | 25.04427 | P29387;A0A0A6YVN9;V9GWY1          | P29387                 | Guanine nucleotide-binding protein subunit     | Gnb4          |
| 26.71293 | 26.33245 | 25.89735 | P29595                            | P29595                 | NEDD8                                          | Nedd8         |
| NaN      | NaN      | 22.14258 | P32261;A0A0A6YXS8;A0A0A6YX49;A0A  | P32261;A0A0A6YXS8;A0A  | Antithrombin-III                               | Serpinc1      |
| NaN      | NaN      | NaN      | P37172                            | P37172                 | Activin receptor type-1                        | Acvr1         |
| 25.73635 | 25.32389 | 25.28912 | P43277;I7HFT9;Q07133              | P43277                 | Histone H1.3                                   | Hist1h1d      |
| 25.34096 | 24.42982 | 24.44884 | P43407                            | P43407                 | Syndecan-2                                     | Sdc2          |
| 24.06907 | 23.60964 | NaN      | P46737                            | P46737                 | Lys-63-specific deubiquitinase BRCC36          | Brcc3         |
| 23.31008 | 23.54038 | 22.96895 | P47968                            | P47968                 | Ribose-5-phosphate isomerase                   | Rpia          |
| 25.57254 | 25.74919 | 25.86703 | P48771                            | P48771                 | Cytochrome c oxidase subunit 7A2, mitocho      | Cox7a2        |
| 22.96895 | 22.66492 | 23.96719 | P49615;A0A0G2JDL3                 | P49615;A0A0G2JDL3      | Cyclin-dependent-like kinase 5                 | Cdk5          |
| 24.05258 | 23.60964 | 22.75328 | P51432                            | P51432                 | 1-phosphatidylinositol 4,5-bisphosphate ph     | Plcb3         |
| 22.82104 | 22.56848 | NaN      | P51670                            | P51670                 | C-C motif chemokine 9                          | Ccl9          |
| 24.67034 | 24.72338 | 24.72338 | P52196                            | P52196                 | Thiosulfate sulfurtransferase                  | Tst           |
| 22.47011 | 21.79154 | 22.46014 | P52795                            | P52795                 | Ephrin-B1                                      | Efnb1         |
| 24.67034 | 25.68378 | 25.79947 | P56379;A0A1Y7VLP0                 | P56379;A0A1Y7VLP0      | 6.8 kDa mitochondrial proteolipid;RIKEN cD     | Mp68;2010107I |
| 23.36453 | 23.49228 | 23.49228 | P58196                            | P58196                 | Phospholipid scramblase 4                      | Plscr4        |
| 23.10789 | 22.29894 | 23.22729 | P59279;Q3TEG7                     | P59279;Q3TEG7          | Ras-related protein Rab-2B                     | Rab2b         |
| 24.26785 | 24.6971  | 24.85757 | P61294;A0A1L1SR56                 | P61294;A0A1L1SR56      | Ras-related protein Rab-6B                     | Rab6b         |
| NaN      | NaN      | NaN      | P61793                            | P61793                 | Lysophosphatidic acid receptor 1               | Lpar1         |
| 24.90885 | 24.77455 | 24.83364 | P62309                            | P62309                 | Small nuclear ribonucleoprotein G              | Snrgp         |
| 23.57542 | 23.46762 | 23.62087 | P62715                            | P62715                 | Serine/threonine-protein phosphatase 2A ca     | Ppp2cb        |
| 24.58118 | 24.75939 | 24.59833 | P62743;A0A0U1RPS0;A0A0U1RQ06      | P62743;A0A0U1RPS0;A0A  | AP-2 complex subunit sigma                     | Ap2s1         |
| 25.15267 | 24.93607 | 24.77455 | P63213                            | P63213                 | Guanine nucleotide-binding protein G(I)/G(S    | Gng2          |
| 25.39428 | 25.44884 | 25.29263 | P70245;A2AC29                     | P70245;A2AC29          | 3-beta-hydroxysteroid-Delta(8),Delta(7)-iso    | Ebp           |
| NaN      | 23.92252 | NaN      | P70333                            | P70333                 | Heterogeneous nuclear ribonucleoprotein H      | Hnrnp2        |
| NaN      | NaN      | NaN      | P70663                            | P70663                 | SPARC-like protein 1                           | Sparcl1       |
| 22.31562 | 22.96719 | 22.30173 | P97363                            | P97363                 | Serine palmitoyltransferase 2                  | Sptlc2        |
| 22.01223 | 22.99335 | 23.32389 | P97379                            | P97379                 | Ras GTPase-activating protein-binding prote    | G3bp2         |
| 23.89504 | NaN      | 23.17646 | P97930;D3Z3R3                     | P97930;D3Z3R3          | Thymidylate kinase                             | Dtymk         |
| 26.3662  | 26.03381 | 26.48001 | P99028                            | P99028                 | Cytochrome b-c1 complex subunit 6, mitoch      | Uqcrrh        |
| 25.22803 | 25.64856 | 25.19084 | Q00780                            | Q00780                 | Collagen alpha-1(VIII) chain                   | Col8a1        |
| NaN      | 22.17341 | 22.91707 | Q01514;A4UU12                     | Q01514;A4UU12          | Guanylate-binding protein 1;Guanylate bind     | Gbp1;Gbp2b    |
| NaN      | NaN      | NaN      | Q04646;A0A1L1SUA9;A0A1L1SQP8      | Q04646;A0A1L1SUA9;A0A  | Sodium/potassium-transporting ATPase sub       | Fxyd2         |
| NaN      | NaN      | NaN      | Q148V8                            | Q148V8                 | Protein FAM83H                                 | Fam83h        |
| NaN      | NaN      | NaN      | Q3KQM4;Q80XR5;P26369              | Q3KQM4;Q80XR5;P26369   | U2 snRNP auxiliary factor large subunit        | U2af2         |
| 25.391   | 24.84805 | 25.88344 | Q35XD3                            | Q35XD3                 | HD domain-containing protein 2                 | Hddc2         |
| 24.85281 | 24.74407 | 25.06085 | Q3THE2;Q9CQ19                     | Q3THE2                 | Myosin regulatory light chain 12B              | Myl12b        |
| 24.15653 | 23.92252 | 24.38443 | Q3THG9;A2A4P3;A2A4P4              | Q3THG9;A2A4P3;A2A4P4   | Alanyl-tRNA editing protein Aarsd1;Predict     | Aarsd1;Gm2702 |

|          |          |          |                                  |                              |                                                                                 |                   |
|----------|----------|----------|----------------------------------|------------------------------|---------------------------------------------------------------------------------|-------------------|
| 21.39624 | NaN      | NaN      | Q3TIR3;A0A1B0GS18                | Q3TIR3;A0A1B0GS18            | Synembryon-A;Synembryon-A (Fragment)                                            | Ric8a             |
| 23.12218 | 23.40406 | 23.5285  | Q3TJ22;J3QN89                    | Q3TJ22;J3QN89                | Angio-associated migratory protein                                              | Aamp              |
| 23.01393 | 23.1519  | 23.12692 | Q3TJZ6                           | Q3TJZ6                       | Protein FAM98A                                                                  | Fam98a            |
| 24.21697 | 24.28912 | 24.74919 | Q3TR20;A0A0R4J0Q9;Q3UM29         | Q3TR20;A0A0R4J0Q9;Q3UM29     | Conserved oligomeric Golgi complex subunit                                      | Cog7              |
| 23.31008 | NaN      | 23.84805 | Q3TSA8;Q8K021;D3YTP4             | Q3TSA8;Q8K021;D3YTP4         | Secretory carrier-associated membrane protein                                   | Scamp1            |
| 23.1961  | 23.05755 | 23.71816 | Q3TYX3                           | Q3TYX3                       | SET and MYND domain-containing protein 5                                        | Smyd5             |
| NaN      | NaN      | NaN      | Q3U3G8;Q9EPB5                    | Q3U3G8;Q9EPB5                | Serine hydrolase-like protein                                                   | Serhl             |
| 23.1379  | 22.91342 | 22.6231  | Q3UE37                           | Q3UE37                       | Ubiquitin-conjugating enzyme E2 Z                                               | Ube2z             |
| NaN      | NaN      | NaN      | Q3UEB4;Q9R008;A0A0G2JEG0;A0A0G2J | Q3UEB4;Q9R008;A0A0G2J        | Mevalonate kinase                                                               | Mvk               |
| 23.62087 | 23.56384 | 23.48001 | Q3UF75;Q9EPC1                    | Q3UF75;Q9EPC1                | Alpha-parvin                                                                    | Parva             |
| 22.48247 | 22.66709 | 22.34028 | Q3UGB5;Q9JII5;D3Z4J1             | Q3UGB5;Q9JII5;D3Z4J1         | DAZ associated protein 1, isoform CRA_b;DAZ                                     | Dazap1            |
| NaN      | 23.16576 | 22.84613 | Q3UGF1                           | Q3UGF1                       | WD repeat-containing protein 19                                                 | Wdr19             |
| 24.63201 | 24.67034 | 24.74919 | Q3UGN9;O88811;P70297;B0R0N7;A2A1 | Q3UGN9;O88811;P70297         | Signal transducing adapter molecule 1;Signal transducing adapter molecule 1     | Stam;Stam2        |
| 24.26069 | 24.65403 | 24.2021  | Q3UHX2                           | Q3UHX2                       | 28 kDa heat- and acid-stable phosphoprotein                                     | Pdap1             |
| 22.09507 | NaN      | NaN      | Q3UKJ7                           | Q3UKJ7                       | WD40 repeat-containing protein SMU1                                             | Smu1              |
| 24.36453 | 25.18707 | 23.81909 | Q3UN10;P56695                    | Q3UN10;P56695                | Wolframin                                                                       | Wfs1              |
| NaN      | NaN      | NaN      | Q3UPH1                           | Q3UPH1                       | Protein PRRC1                                                                   | Prrc1             |
| 23.75939 | 23.36453 | NaN      | Q3UPZ0;Q62217                    | Q3UPZ0;Q62217                | Sema domain, seven thrombospondin repeat                                        | Sema5a            |
| NaN      | NaN      | NaN      | Q3UTR7;P11859                    | Q3UTR7;P11859                | Angiotensinogen                                                                 | Agt               |
| NaN      | 23.68646 | 23.80931 | Q4FCQ7;J3QNU1;A0A1L1SQ41;Q9Z2A5  | Q4FCQ7;J3QNU1;A0A1L1SQ41     | Arginyl-tRNA-protein transferase 1                                              | Ate1              |
| 28.41135 | 28.61456 | 28.509   | Q4LFA9                           | Q4LFA9                       | Semaphorin-3G                                                                   | Sema3g            |
| NaN      | NaN      | NaN      | Q505D1                           | Q505D1                       | Serine/threonine-protein phosphatase 6 regulator 1                              | Ankrd28           |
| 23.63201 | 23.64306 | 23.94056 | Q5F2E8;F6RXB5;A0A0R41T3;Q8BYC6   | Q5F2E8;F6RXB5;A0A0R41T3      | Serine/threonine-protein kinase TAO1;Serine/threonine-protein kinase TAO1       | Taok1;Taok3       |
| NaN      | NaN      | NaN      | Q5SPX8;P58802                    | Q5SPX8;P58802                | TBC1 domain family member 10A                                                   | Tbc1d10a          |
| 23.70767 | 23.68646 | 23.74919 | Q5SSZ5                           | Q5SSZ5                       | Tensin-3                                                                        | Tns3              |
| 22.14569 | NaN      | 22.61189 | Q5SUH7;Q5SUH6;Q99KN9             | Q5SUH7;Q5SUH6;Q99KN9         | Clathrin interactor 1                                                           | Clint1            |
| 23.09023 | 23.26785 | 23.42982 | Q5SUT0;Q5SUS9;Q61545             | Q5SUT0;Q5SUS9;Q61545         | RNA-binding protein EWS                                                         | Ewsr1             |
| 23.76951 | 23.73892 | 23.91342 | Q5SVG5;Q5SVG4;O35643             | Q5SVG5;Q5SVG4;O35643         | AP complex subunit beta;AP-1 complex subunit beta                               | Ap1b1             |
| 23.79947 | 23.85757 | 23.86703 | Q5SX40;B1AR69;G3UW82;Q5SX39;P13  | Q5SX40;B1AR69;G3UW82         | Myosin-1;Myosin, heavy polypeptide 13, skeletal muscle                          | Myh11;Myh13;Myh19 |
| 23.86703 | 23.44253 | 23.62087 | Q5SXA5;Q5SXA4;Q5SRX1             | Q5SXA5;Q5SXA4;Q5SRX1         | TOM1-like protein 2                                                             | Tom1l2            |
| 24.63201 | 24.49838 | 24.28912 | Q5U4H9;E9Q0D2;E9Q2H3             | Q5U4H9;E9Q0D2;E9Q2H3         | Nuclear receptor coactivator 4;Nuclear receptor coactivator 4                   | Ncoa4             |
| 23.51653 | 23.49228 | 23.02411 | Q5XKN4;A0A0N4SV89                | Q5XKN4;A0A0N4SV89            | Protein jagunal homolog 1                                                       | Jagn1             |
| 25.23169 | 26.1546  | 25.06907 | Q60772                           | Q60772                       | Cyclin-dependent kinase 4 inhibitor C                                           | Cdkn2c            |
| 24.62087 | 25.12534 | 25.1757  | Q60960;G3UXF0                    | Q60960;G3UXF0                | Importin subunit alpha-5;Importin subunit alpha-5                               | Kpna1             |
| 23.57542 | 23.66492 | 23.72858 | Q60972                           | Q60972                       | Histone-binding protein RBBP4                                                   | Rbbp4             |
| 27.71947 | 27.41538 | 27.43936 | Q61735                           | Q61735                       | Leukocyte surface antigen CD47                                                  | Cd47              |
| 22.96895 | 23.54038 | 23.21401 | Q62011;A8Y5F6                    | Q62011;A8Y5F6                | Podoplanin                                                                      | Pdpn              |
| 24.33756 | 24.31008 | 24.38443 | Q62074;F6QWV4                    | Q62074;F6QWV4                | Protein kinase C iota type;Protein kinase C iota                                | Prcki             |
| 24.54628 | 25.04843 | NaN      | Q62266                           | Q62266                       | Cornifin-A                                                                      | Sprn1a            |
| 22.54981 | 22.31008 | 22.74919 | Q62273;E9PZ06;F8WI08             | Q62273;E9PZ06;F8WI08         | Sulfate transporter;Sulfate transporter (Fragment)                              | Slc26a2           |
| 25.1488  | 24.78457 | 25.05672 | Q63810                           | Q63810                       | Calcineurin subunit B type 1                                                    | Ppp3r1            |
| 24.391   | 24.28207 | 24.67034 | Q63850                           | Q63850                       | Nuclear pore glycoprotein p62                                                   | Nup62             |
| 23.97596 | 23.57542 | 23.391   | Q63ZW6;F7CK55                    | Q63ZW6;F7CK55                | Col4a5 protein;Collagen, type IV, alpha 5 (Fragment)                            | Col4a5            |
| 23.02918 | 23.37782 | 23.99335 | Q64261;A0A0G2JGA8                | Q64261                       | Cyclin-dependent kinase 6                                                       | Cdk6              |
| 26.63201 | 26.49381 | 26.05879 | Q642K5;P62862                    | Q642K5;P62862                | 40S ribosomal protein S30                                                       | Fau               |
| 23.76951 | NaN      | NaN      | Q64345;E9PV48                    | Q64345;E9PV48                | Interferon-induced protein with tetratricopeptide repeats 3;Ifft3               | Ifft3b            |
| NaN      | NaN      | NaN      | Q64429                           | Q64429                       | Cytochrome P450 1B1                                                             | Cyp1b1            |
| NaN      | 23.5285  | 23.16883 | Q64437                           | Q64437                       | Alcohol dehydrogenase class 4 mu/sigma class 4 mu                               | Adh7              |
| NaN      | NaN      | NaN      | Q64695;A2AUV5                    | Q64695;A2AUV5                | Endothelial protein C receptor;Endothelial protein C receptor                   | Procr             |
| 21.66709 | NaN      | NaN      | Q692F7;Q3TWN3                    | Q692F7;Q3TWN3                | Metal transporter CNNM4;Metal transporter CNNM4                                 | Cnnm4;Cnnm2       |
| NaN      | NaN      | 22.39885 | Q6KAU4                           | Q6KAU4                       | Multivesicular body subunit 12B                                                 | Mvb12b            |
| 25.10149 | 24.6971  | 24.32389 | Q6XLQ8                           | Q6XLQ8                       | Calumenin                                                                       | Calu              |
| 22.91525 | 22.89874 | 23.49228 | Q6ZPE2;F7AWK3;D6RG52             | Q6ZPE2;F7AWK3;D6RG52         | Myotubularin-related protein 5;Myotubularin-related protein 5                   | Sbf1              |
| NaN      | 22.75124 | 22.74919 | Q76N33                           | Q76N33                       | AMSH-like protease                                                              | Stambp1           |
| 24.91798 | 25.00624 | 24.92705 | Q78IK2                           | Q78IK2                       | Up-regulated during skeletal muscle growth                                      | Usmg5             |
| 22.82687 | 22.5545  | 22.96543 | Q78IS1                           | Q78IS1                       | Transmembrane emp24 domain-containing protein 1                                 | Tmed3             |
| 28.16997 | 28.20303 | 28.29351 | Q7M6W1;A3QM89;Q8K0T0             | Q7M6W1;A3QM89;Q8K0T0         | Reticulon;Reticulon (Fragment);Reticulon-1                                      | Rtn1              |
| NaN      | NaN      | 24.72858 | Q7TS64;Q99MK8;F7AEX1;F6Y9P3;F6QY | Q7TS64;Q99MK8;F7AEX1         | G protein-coupled receptor kinase;Beta-adrenergic receptor kinase 2             | Grk2              |
| NaN      | 22.87267 | NaN      | Q80TA1;D6RE20;Q8CET7             | Q80TA1;D6RE20;Q8CET7         | Ethanolaminephosphotransferase 1;DNA sequence-specific endonuclease             | Seleno1           |
| 21.66275 | 21.40665 | 21.8423  | Q80TA9                           | Q80TA9                       | Ectopic P granules protein 5 homolog                                            | Epg5              |
| 24.17188 | 24.11744 | 21.64966 | Q80U95;A0A0G2JDR9                | Q80U95;A0A0G2JDR9            | Ubiquitin-protein ligase E3C                                                    | Ube3c             |
| 23.80931 | 23.51653 | 23.82881 | Q80UM7                           | Q80UM7                       | Mannosyl-oligosaccharide glucosidase                                            | Mogs              |
| NaN      | 22.17035 | 23.33756 | Q80UY2;A0A0U1RNG8;A0A0N4SV15     | Q80UY2;A0A0U1RNG8;A0A0N4SV15 | E3 ubiquitin-protein ligase KCMF1                                               | Kcmf1             |
| 23.03591 | 22.58463 | 22.94414 | Q80VD1                           | Q80VD1                       | Protein FAM98B                                                                  | Fam98b            |
| NaN      | 22.60286 | 22.65622 | Q80W68                           | Q80W68                       | Kin of IRRE-like protein 1                                                      | Kirrel1           |
| NaN      | 22.95305 | 23.09507 | Q80WQ6                           | Q80WQ6                       | Inactive rhomboid protein 2                                                     | Rhbd2             |
| 24.07725 | 24.74407 | 23.49228 | Q80XI4;F6RJE8;O70172             | Q80XI4;F6RJE8;O70172         | Phosphatidylinositol 5-phosphate 4-kinase type 1B                               | Pip4k2b;Pip4k2c   |
| 27.09144 | 25.56674 | 24.33074 | Q80Y14;A0A1Y7VN70                | Q80Y14;A0A1Y7VN70            | Glutaredoxin-related protein 5, mitochondrial                                   | Glrx5             |
| 24.42342 | 23.77957 | 25.66221 | Q80Y44                           | Q80Y44                       | Probable ATP-dependent RNA helicase DDX4                                        | Ddx4              |
| NaN      | NaN      | 24.02749 | Q80ZX0;F6VJC5                    | Q80ZX0;F6VJC5                | Sec24-related gene family, member B (S. cerevisiae)                             | Sec24b            |
| 24.46139 | 24.8811  | NaN      | Q8BG75                           | Q8BG75                       | Alanine aminotransferase 2                                                      | Gpt2              |
| NaN      | NaN      | 23.91342 | Q8BH24                           | Q8BH24                       | Transmembrane 9 superfamily member 4                                            | Tm9sf4            |
| 24.54628 | 24.87173 | 24.62645 | Q8BK72                           | Q8BK72                       | 28S ribosomal protein S27, mitochondrial                                        | Mrsps27           |
| NaN      | NaN      | NaN      | Q8BND3                           | Q8BND3                       | WD repeat-containing protein 35                                                 | Wdr35             |
| 23.60964 | 22.55918 | NaN      | Q8BPM0                           | Q8BPM0                       | Disheveled-associated activator of morphogenesis                                | Daa1              |
| 25.77957 | 25.56964 | 22.42726 | Q8BTU6;P10630;E9Q561             | Q8BTU6;P10630;E9Q561         | Eukaryotic initiation factor 4A-II                                              | Eif4a2            |
| 24.27498 | 24.02749 | 25.77706 | Q8BU31;Q80ZJ1                    | Q8BU31;Q80ZJ1                | Ras-related protein Rap-2c;Ras-related protein 2c                               | Rap2c;Rap2a       |
| NaN      | NaN      | NaN      | Q8BVQ5;A0A140L184                | Q8BVQ5;A0A140L184            | Protein phosphatase methyltransferase 1;Protein phosphatase methyltransferase 1 | Ppme1             |
| NaN      | NaN      | NaN      | Q8BX70;A0A1L1SS63                | Q8BX70;A0A1L1SS63            | Vacuolar protein sorting-associated protein 33                                  | Vps13c            |
| 22.03255 | 21.29894 | NaN      | Q8BXV2                           | Q8BXV2                       | BRI3-binding protein                                                            | Bri3bp            |
| NaN      | 24.87643 | 21.70134 | Q8BZW8                           | Q8BZW8                       | NHL repeat-containing protein 2                                                 | Nhlrc2            |
| 24.62645 | 24.61526 | 24.69179 | Q8C048;A2ALL9;Q0VF55;S4R1C4      | Q8C048;A2ALL9;Q0VF55;S4R1C4  | Calcium-transporting ATPase                                                     | Atp2b3            |
| 24.48616 | 24.74919 | 24.417   | Q8C5G6;Q9QZ06;A9JEI5;F7AT44      | Q8C5G6;Q9QZ06;A9JEI5;F7AT44  | Toll-interacting protein;Toll interacting protein                               | Tollip;Toll       |
| NaN      | 20.37518 | 25.1332  | Q8CCF0                           | Q8CCF0                       | PQ-loop repeat-containing protein 3                                             | Pqlc3             |
| 27.05051 | 26.5285  | NaN      | Q8CFU8;G3UXZ2                    | Q8CFU8;G3UXZ2                | U4/U6 small nuclear ribonucleoprotein Prp3                                      | Prrp31            |
| NaN      | NaN      | 26.69975 | Q8CG70;D6RHQ3                    | Q8CG70;D6RHQ3                | Tumor protein p53-inducible nuclear protein 1                                   | Tp53inp2;Trp53    |
| NaN      | 24.46762 | NaN      | Q8CG76                           | Q8CG76                       | Prolyl 3-hydroxylase 3                                                          | P3h3              |
|          |          |          |                                  |                              | Aflatoxin B1 aldehyde reductase member 2                                        | Akr7a2            |

|          |          |          |                                  |                                  |                                                |                |
|----------|----------|----------|----------------------------------|----------------------------------|------------------------------------------------|----------------|
| NaN      | NaN      | NaN      | Q8CGC6                           | Q8CGC6                           | RNA-binding protein 28                         | Rbm28          |
| NaN      | NaN      | NaN      | Q8CHK3                           | Q8CHK3                           | Lysophospholipid acyltransferase 7             | Mboat7         |
| 23.66492 | 23.67573 | 22.87455 | Q8CHP8                           | Q8CHP8                           | Glycerol-3-phosphate phosphatase               | Pgp            |
| 23.32389 | 23.54038 | 23.391   | Q8CIH9                           | Q8CIH9                           | Amidophosphoribosyltransferase                 | Ppat           |
| 24.33074 | 24.43619 | 24.42982 | Q8CJ40                           | Q8CJ40                           | Rootletin                                      | Crocc          |
| 22.77957 | 22.51171 | 22.58921 | Q8K0D5                           | Q8K0D5                           | Elongation factor G, mitochondrial             | Gfm1           |
| 24.81421 | 24.93157 | 24.79452 | Q8K183                           | Q8K183                           | Pyridoxal kinase                               | Pdxk           |
| NaN      | NaN      | NaN      | Q8K224                           | Q8K224                           | RNA cytidine acetyltransferase                 | Nat10          |
| NaN      | NaN      | NaN      | Q8K363;F6ZX28                    | Q8K363;F6ZX28                    | ATP-dependent RNA helicase DDX18;ATP-de        | Ddx18          |
| 23.19009 | 23.08699 | 23.2535  | Q8K3H0                           | Q8K3H0                           | DCC-interacting protein 13-alpha               | Appl1          |
| 24.04427 | 24.02749 | 24.06907 | Q8K3J1                           | Q8K3J1                           | NADH dehydrogenase [ubiquinone] iron-sulf      | Ndufs8         |
| NaN      | NaN      | NaN      | Q8K4Z5                           | Q8K4Z5                           | Splicing factor 3A subunit 1                   | Sf3a1          |
| 23.23608 | 23.56384 | 23.70767 | Q8N7N5                           | Q8N7N5                           | DDB1- and CUL4-associated factor 8             | Dcaf8          |
| NaN      | NaN      | NaN      | Q8QZY9                           | Q8QZY9                           | Splicing factor 3B subunit 4                   | Sf3b4          |
| 22.40406 | 22.67788 | NaN      | Q8R0G9                           | Q8R0G9                           | Nuclear pore complex protein Nup133            | Nup133         |
| NaN      | NaN      | NaN      | Q8R116;B7ZCA6                    | Q8R116;B7ZCA6                    | Palmitoleoyl-protein carboxylesterase NOTU     | Notum          |
| 23.0258  | 23.21401 | 23.71816 | Q8R127;J3QNN5;F6S0R8             | Q8R127;J3QNN5;F6S0R8             | Saccharopine dehydrogenase-like oxidoreduc     | Scppdh         |
| 26.07725 | 26.13516 | 26.1795  | Q8R1I1                           | Q8R1I1                           | Cytochrome b-c1 complex subunit 9              | Uqcrl0         |
| 21.2764  | 21.43746 | 19.74222 | Q8R1N4;A0A0A0MQL8                | Q8R1N4;A0A0A0MQL8                | NudC domain-containing protein 3;NudC do       | Nudcd3         |
| NaN      | NaN      | NaN      | Q8R1V4;Q5SVW9                    | Q8R1V4;Q5SVW9                    | Transmembrane emp24 domain-containing          | Tmed4          |
| NaN      | NaN      | NaN      | Q8R2G6                           | Q8R2G6                           | Coiled-coil domain-containing protein 80       | Ccdc80         |
| 23.46762 | 23.68646 | 23.417   | Q8R2U6;P0C028;P0C027             | Q8R2U6;P0C028;P0C027             | Diphosphoinositol polyphosphate phosphoh       | Nudt4;Nudt11   |
| 22.15808 | 22.01563 | 22.0258  | Q8R317                           | Q8R317                           | Ubiquitin-1                                    | Ubln1          |
| NaN      | NaN      | NaN      | Q8R323                           | Q8R323                           | Replication factor C subunit 3                 | Rfc3           |
| 22.97596 | NaN      | 22.64526 | Q8R349                           | Q8R349                           | Cell division cycle protein 16 homolog         | Cdc16          |
| 29.65438 | NaN      | 29.71129 | Q8R480                           | Q8R480                           | Nuclear pore complex protein Nup85             | Nup85          |
| 23.91342 | 24.67034 | 24.49228 | Q8VCB1;J3QPB5                    | Q8VCB1;J3QPB5                    | Nucleoporin NDC1                               | Ndc1           |
| NaN      | NaN      | NaN      | Q8VCF1                           | Q8VCF1                           | Soluble calcium-activated nucleotidase 1       | Cant1          |
| 24.58692 | 24.54038 | 24.20955 | Q8VCR4;Q9DCG9                    | Q8VCR4;Q9DCG9                    | O610038D11R11k protein;Multifunctional me      | Trmt112        |
| NaN      | NaN      | NaN      | Q8VCW8                           | Q8VCW8                           | Acyl-CoA synthetase family member 2, mito      | Acsc2          |
| 25.19084 | 25.50446 | 25.43936 | Q8VD65                           | Q8VD65                           | Phosphoinositide 3-kinase regulatory subun     | Pik3r4         |
| NaN      | NaN      | NaN      | Q8VDD8                           | Q8VDD8                           | WASH complex subunit 1                         | Washc1         |
| NaN      | NaN      | NaN      | Q8VDP4                           | Q8VDP4                           | Cell cycle and apoptosis regulator protein 2   | Ccar2          |
| 24.44253 | 24.50446 | 24.30313 | Q8VDZ4                           | Q8VDZ4                           | Palmitoyltransferase ZDHHC5                    | Zdhhc5         |
| 21.92071 | 21.77153 | 21.8423  | Q8VE88                           | Q8VE88                           | Protein FAM114A2                               | Fam114a2       |
| 24.84805 | 24.94056 | 24.17188 | Q8VE91                           | Q8VE91                           | Reticulophagy regulator 1                      | Retreg1d       |
| 22.74098 | 23.46762 | 23.50446 | Q8VE98;A0A11SUD4                 | Q8VE98;A0A11SUD4                 | CD276 antigen;CD276 antigen (Fragment)         | Cd276          |
| NaN      | NaN      | NaN      | Q8VHB5;F6XXU0                    | Q8VHB5;F6XXU0                    | Carbonic anhydrase 9;Carbonic anhydrase 9      | Ca9;Car9       |
| 24.99766 | 26.22066 | 25.05258 | Q8VHE6                           | Q8VHE6                           | Dynein heavy chain 5, axonemal                 | Dnah5          |
| 24.1332  | 23.45513 | 24.63201 | Q91V64                           | Q91V64                           | Isochorismatase domain-containing protein      | Isoc1          |
| 26.34773 | 26.23535 | 26.1035  | Q91VR7                           | Q91VR7                           | Microtubule-associated proteins 1A/1B light    | Map1lc3a       |
| 25.96279 | NaN      | 25.92705 | Q91W18;F6Z120;E9Q6T6             | Q91W18;F6Z120;E9Q6T6             | Tudor domain-containing protein 3;Tudor do     | Tdrd3          |
| NaN      | NaN      | 21.87267 | Q91WR3                           | Q91WR3                           | Activating signal integrator 1 complex sub     | Asc2           |
| 22.44    | 22.41442 | NaN      | Q91XD6                           | Q91XD6                           | Vacuolar protein-sorting-associated protein    | Vps36          |
| 25.11347 | 25.11347 | 24.36453 | Q91XX1;A0A0A6YXZ9;A0A0A6YV55;Q91 | Q91XX1;A0A0A6YXZ9;A0A0A6YV55;Q91 | Protocadherin gamma C3;Protocadherin gam       | Pcdhgc3;Pcdhgc |
| NaN      | 21.58692 | 21.58692 | Q91YR5                           | Q91YR5                           | Methyltransferase-like protein 13              | Mettl13        |
| 22.11426 | 21.44758 | 20.96719 | Q91YR7                           | Q91YR7                           | Pre-mRNA-processing factor 6                   | Prpf6          |
| 24.83364 | 24.63201 | 24.80931 | Q91YS8;D3Z368                    | Q91YS8;D3Z368                    | Calcium/calmodulin-dependent protein kina      | Camk1          |
| 26.58978 | 26.39264 | 26.87408 | Q920Q2                           | Q920Q2                           | DNA repair protein REV1                        | Rev1           |
| 23.09507 | 22.93157 | NaN      | Q921I1;D3YYR8                    | Q921I1                           | Serotransferrin                                | Tf             |
| 21.6584  | NaN      | NaN      | Q921I2;G3UZG5;G3UZ63;G3X961      | Q921I2;G3UZG5;G3UZ63;G3X961      | Kelch domain-containing protein 4              | Klhdc4         |
| 23.14102 | 22.77756 | 23.2535  | Q921U7;Q8C281;Q8CE04;Q8CE80;P511 | Q921U7;Q8C281;Q8CE04;Q8CE80;P511 | Calpastatin                                    | Cast           |
| 23.75939 | 23.72858 | 24.03591 | Q922H1                           | Q922H1                           | Protein arginine N-methyltransferase 3         | Prmt3          |
| NaN      | NaN      | NaN      | Q99J23                           | Q99J23                           | GH3 domain-containing protein                  | Ghdc           |
| 25.1488  | 25.35448 | 25.50142 | Q99J56                           | Q99J56                           | Derlin-1                                       | Der1           |
| 23.82881 | NaN      | 23.37782 | Q99J87                           | Q99J87                           | Probable ATP-dependent RNA helicase DHX5       | Dhx58          |
| NaN      | 23.35111 | 23.24191 | Q99LB6;E0CYU5                    | Q99LB6;E0CYU5                    | Methionine adenosyltransferase 2 subunit b     | Mat2b          |
| 22.84613 | 22.99852 | 23.24916 | Q99LC8;A0A0G2JEF1;D3YZ05;D3Z151  | Q99LC8;A0A0G2JEF1;D3YZ05;D3Z151  | Translation initiation factor eIF-2B subunit a | Eif2b1         |
| 24.72858 | NaN      | 24.06907 | Q99LT0                           | Q99LT0                           | Protein dpy-30 homolog                         | Dpy30          |
| NaN      | NaN      | NaN      | Q99M20                           | Q99M20                           | Kallikrein j                                   | Klk10          |
| 23.31008 | 23.26785 | 21.96367 | Q99M87                           | Q99M87                           | Dnaj homolog subfamily A member 3, mito        | Dnaja3         |
| 22.17035 | NaN      | 22.23023 | Q99MR3                           | Q99MR3                           | Solute carrier family 12 member 9              | Slc12a9        |
| 22.7348  | 22.56384 | 22.71398 | Q9CPX6                           | Q9CPX6                           | Ubiquitin-like-conjugating enzyme ATG3         | Atg3           |
| 24.14102 | 24.36453 | 24.35111 | Q9CQ75                           | Q9CQ75                           | NADH dehydrogenase [ubiquinone] 1 alpha        | Ndufa2         |
| 22.35917 | 22.69498 | 22.08537 | Q9CQA1                           | Q9CQA1                           | Trafficking protein particle complex subunit   | Trappc5        |
| 25.04843 | 24.78955 | 25.33415 | Q9CQH7                           | Q9CQH7                           | Transcription factor BTF3 homolog 4            | Btf3l4         |
| NaN      | NaN      | NaN      | Q9CQI3;D3YY93                    | Q9CQI3;D3YY93                    | Glia maturation factor beta;Glia maturation    | Gmfb           |
| 24.90426 | 25.81176 | 22.96014 | Q9CQM2                           | Q9CQM2                           | ER lumen protein-retaining receptor 2          | Kdelr2         |
| 24.2535  | 24.10949 | 23.99335 | Q9CQN6                           | Q9CQN6                           | Transmembrane protein 14C                      | Tmem14c        |
| 24.82881 | 24.63201 | 24.09346 | Q9CQR4                           | Q9CQR4                           | Acyl-coenzyme A thioesterase 13                | Aco13          |
| 25.21697 | 25.28912 | 25.45199 | Q9CQS8;E9PW43                    | Q9CQS8;E9PW43                    | Protein transport protein Sec61 subunit beta   | Sec61b;Gm103;  |
| 23.96719 | 24.35783 | 24.02749 | Q9CQU3                           | Q9CQU3                           | Protein RER1                                   | Rer1           |
| NaN      | 22.01563 | 22.48247 | Q9CQY1                           | Q9CQY1                           | Ubiquitin-like protein ATG12                   | Atg12          |
| 23.2535  | 23.1946  | NaN      | Q9CR41                           | Q9CR41                           | Huntingtin-interacting protein K               | Hypk           |
| 23.75939 | 24.391   | 24.78457 | Q9CR60                           | Q9CR60                           | Vesicle transport protein GOT1B                | Golt1b         |
| 24.69179 | 24.05258 | 24.07725 | Q9CR86                           | Q9CR86                           | Calcium-regulated heat stable protein 1        | Carhsp1        |
| 25.80193 | 26.08537 | 25.28912 | Q9CRC0                           | Q9CRC0                           | Vitamin K epoxide reductase complex subun      | Vkorc1         |
| 24.57542 | 24.7543  | 24.57542 | Q9CRD2                           | Q9CRD2                           | ER membrane protein complex subunit 2          | Emc2           |
| 22.75735 | 24.7543  | NaN      | Q9CWU9                           | Q9CWU9                           | Nucleoporin Nup37                              | Nup37          |
| NaN      | NaN      | NaN      | Q9CXP4                           | Q9CXP4                           | Rho GTPase-activating protein 8                | Arhgap8        |
| NaN      | NaN      | NaN      | Q9CXT7;A0A1B0GS44                | Q9CXT7;A0A1B0GS44                | Transmembrane protein 192                      | Tmem192        |
| 23.35111 | 23.23023 | 22.92976 | Q9CXY6                           | Q9CXY6                           | Interleukin enhancer-binding factor 2          | Ilf2           |
| 22.91342 | 23.04593 | 22.92976 | Q9CZH3                           | Q9CZH3                           | Proteasome assembly chaperone 3                | Psmg3          |
| NaN      | NaN      | NaN      | Q9D0F6;D3Z1Y6                    | Q9D0F6;D3Z1Y6                    | Replication factor C subunit 5                 | Rfc5           |
| NaN      | NaN      | 24.26069 | Q9D0J4                           | Q9D0J4                           | ADP-ribosylation factor-like protein 2         | Arl2           |
| 25.69975 | 25.67573 | 25.60399 | Q9D0J8                           | Q9D0J8                           | Parathyromin                                   | Ptms           |
| 23.76951 | 23.79947 | 22.99852 | Q9D0M5;D6RIN4                    | Q9D0M5                           | Dynein light chain 2, cytoplasmic              | Dynll2         |
| 23.55215 | NaN      | 23.58692 | Q9D0P8                           | Q9D0P8                           | Intraflagellar transport protein 27 homolog    | Ift27          |

|          |          |          |                                   |                                   |                                                |               |
|----------|----------|----------|-----------------------------------|-----------------------------------|------------------------------------------------|---------------|
| 24.26785 | 23.99335 | 24.1332  | Q9D059                            | Q9D059                            | Histidine triad nucleotide-binding protein 2,  | Hint2         |
| 24.28207 | 23.83846 | 23.31008 | Q9D0W5                            | Q9D0W5                            | Peptidyl-prolyl cis-trans isomerase-like 1     | Ppil1         |
| 24.97596 | 24.60399 | 25.11744 | Q9D187;A0A1D5RMIO;F8WHV1          | Q9D187;A0A1D5RMIO;F8WHV1          | Mitotic spindle-associated MMXD complex        | Fam96b        |
| NaN      | NaN      | NaN      | Q9D1E8;F8WGD9                     | Q9D1E8;F8WGD9                     | 1-acyl-sn-glycerol-3-phosphate acyltransferase | Agpat5        |
| NaN      | NaN      | NaN      | Q9D1J3;A0A1W2P7G2;A0A1W2P6N2      | Q9D1J3;A0A1W2P7G2;A0A1W2P6N2      | SAP domain-containing ribonucleoprotein        | Sarrp         |
| 24.90885 | 24.98902 | 24.85757 | Q9D1T2;Q9CZH7                     | Q9D1T2;Q9CZH7                     | Matrix-remodeling-associated protein 7         | Mxra7         |
| 29.01903 | 28.97869 | 28.97323 | Q9D305                            | Q9D305                            | THAP domain-containing protein 2               | Thap2         |
| 27.67303 | 27.60399 | 27.50142 | Q9D3D9                            | Q9D3D9                            | ATP synthase subunit delta, mitochondrial      | Atp5d         |
| NaN      | NaN      | 24.35111 | Q9D4H1                            | Q9D4H1                            | Exocyst complex component 2                    | Exoc2         |
| 22.64306 | 22.4996  | NaN      | Q9D5T0                            | Q9D5T0                            | ATPase family AAA domain-containing prote      | Atad1         |
| 24.8044  | 24.90426 | 24.56964 | Q9D6I6                            | Q9D6I6                            | NADH dehydrogenase [ubiquinone] flavopro       | Ndufv2        |
| 21.94235 | 22.20658 | 21.74714 | Q9D771                            | Q9D771                            | Transmembrane protein 206                      | Tmem206       |
| NaN      | NaN      | 24.35111 | Q9D7B7                            | Q9D7B7                            | Probable glutathione peroxidase 8              | Gpx8          |
| 22.46513 | 23.391   | NaN      | Q9D832                            | Q9D832                            | DnaJ homolog subfamily B member 4              | Dnajb4        |
| NaN      | 23.26785 | 23.18858 | Q9D892                            | Q9D892                            | Inosine triphosphate pyrophosphatase           | Itpa          |
| 22.70134 | 22.30452 | 22.50688 | Q9D8N2;D6RIQ6;D3YUG1;Q3TH34       | Q9D8N2;D6RIQ6;D3YUG1              | Protein FAM45A;Protein FAM45A (Fragment        | Fam45a        |
| NaN      | NaN      | NaN      | Q9D855;O35326                     | Q9D855;O35326                     | MCG7614, isoform CRA_c;Serine/arginine-ri      | Srsf5         |
| 22.90426 | 23.36453 | 23.48001 | Q9DB07                            | Q9DB07                            | Intraflagellar transport protein 46 homolog    | Ift46         |
| 23.92252 | 23.92252 | 22.75124 | Q9DB10;E0CZF0                     | Q9DB10;E0CZF0                     | Essential MCU regulator, mitochondrial         | Smdt1         |
| 23.04093 | 23.00881 | 23.6971  | Q9DBL7                            | Q9DBL7                            | Bifunctional coenzyme A synthase               | Coasy         |
| NaN      | NaN      | NaN      | Q9DC29                            | Q9DC29                            | ATP-binding cassette sub-family B member       | Abcb6         |
| 25.35448 | 25.46762 | 25.03171 | Q9DC37                            | Q9DC37                            | Major facilitator superfamily domain-contain   | Mfsd1         |
| NaN      | NaN      | NaN      | Q9DC42;A0A0D9SEG8;E9QMJ5;E9QJ57;  | Q9DC42;A0A0D9SEG8;E9QMJ5;E9QJ57;  | Adhesion G protein-coupled receptor E5         | Adgre5        |
| 24.01052 | 22.47754 | 23.67573 | Q9DC70                            | Q9DC70                            | NADH dehydrogenase [ubiquinone] iron-sulf      | Ndufs7        |
| 21.96719 | 22.29053 | 22.239   | Q9DCE6;E0CXT5;E9PX84;Q3TRE6;E9QL  | Q9DCE6;E0CXT5;E9PX84;Q3TRE6;E9QL  | Disabled homolog 2                             | Dab2          |
| 23.87643 | 23.5285  | 23.72858 | Q9DCJ5                            | Q9DCJ5                            | NADH dehydrogenase [ubiquinone] 1 alpha        | Ndufa8        |
| 23.42982 | 23.29614 | 23.5285  | Q9DCS3;A2A845                     | Q9DCS3;A2A845                     | Enoyl-[acyl-carrier-protein] reductase, mito   | Mecr          |
| NaN      | 22.48738 | NaN      | Q9EQI8                            | Q9EQI8                            | 39S ribosomal protein L46, mitochondrial       | Mrpl46        |
| 23.63201 | 23.60964 | 23.63201 | Q9ERS2                            | Q9ERS2                            | NADH dehydrogenase [ubiquinone] 1 alpha        | Ndufa13       |
| NaN      | 23.36453 | NaN      | Q9ESP1                            | Q9ESP1                            | Stromal cell-derived factor 2-like protein 1   | Sdf2l1        |
| NaN      | NaN      | NaN      | Q9EST4;REV__A0A0A6YWX5            | Q9EST4;REV__A0A0A6YWX5            | Proteasome assembly chaperone 2;Voltage-       | Psmg2;Cacnb2  |
| NaN      | NaN      | NaN      | Q9ET22                            | Q9ET22                            | Dipeptidyl peptidase 2                         | Dpp7          |
| 22.3073  | 23.29614 | NaN      | Q9JIP6                            | Q9JIP6                            | Frizzled-2                                     | Fzd2          |
| NaN      | NaN      | NaN      | Q9JJA4;D3Z369                     | Q9JJA4;D3Z369                     | Ribosome biogenesis protein WDR12;Ribosom      | Wdr12         |
| 24.73892 | 25.16806 | 25.09748 | Q9JF9                             | Q9JF9                             | Signal peptide peptidase-like 2A               | Spp12a        |
| 23.94949 | 24.28912 | 24.04427 | Q9JKN1                            | Q9JKN1                            | Zinc transporter 7                             | Slc30a7       |
| 27.93719 | 27.85638 | 27.99226 | Q9JKW0;A0A0U1RPY6                 | Q9JKW0;A0A0U1RPY6                 | ADP-ribosylation factor-like protein 6-intera  | Arl6ip1       |
| NaN      | NaN      | NaN      | Q9JMS1                            | Q9JMS1                            | Prostaglandin E synthase                       | Ptgs          |
| NaN      | NaN      | NaN      | Q9JMK0                            | Q9JMK0                            | Beta-1,4-galactosyltransferase 5               | B4galnt5      |
| NaN      | NaN      | NaN      | Q9QXK7;A0A1Y7VIZ9;A0A1Y7VJ97;A0A  | Q9QXK7;A0A1Y7VIZ9;A0A1Y7VJ97;A0A  | Cleavage and polyadenylation specificity fac   | Cpsf3         |
| NaN      | NaN      | NaN      | Q9QZC7                            | Q9QZC7                            | Pleckstrin homology domain-containing fam      | Plekhb2       |
| 22.01903 | 22.48247 | 22.33756 | Q9QZD8                            | Q9QZD8                            | Mitochondrial dicarboxylate carrier            | Slc25a10      |
| 24.65403 | 24.84326 | 24.41054 | Q9QZI9                            | Q9QZI9                            | Serine incorporator 3                          | Serinc3       |
| 24.91798 | 24.56384 | NaN      | Q9QZM0                            | Q9QZM0                            | Ubiquitin-2                                    | Ubqln2        |
| 24.32389 | 24.42982 | 25.01903 | Q9QZM4                            | Q9QZM4                            | Tumor necrosis factor receptor superfamily     | Tnfrsf10b     |
| NaN      | 23.1991  | NaN      | Q9R078;S4R2R1                     | Q9R078;S4R2R1                     | 5-AMP-activated protein kinase subunit beta    | Prkab1        |
| NaN      | NaN      | 22.86325 | Q9R099                            | Q9R099                            | Transducin beta-like protein 2                 | Tbl2          |
| 25.26069 | 25.03171 | 25.16423 | Q9R1Q6;A0A0N4SUM7;A0A0N4SUY1;A0   | Q9R1Q6;A0A0N4SUM7;A0A0N4SUY1;A0   | Transmembrane protein 176B;Transmembran        | Tmem176b      |
| 28.27142 | 28.51653 | 28.74855 | Q9R1Q7                            | Q9R1Q7                            | Proteolipin protein 2                          | Plp2          |
| NaN      | NaN      | 20.81127 | Q9R1X5                            | Q9R1X5                            | Multidrug resistance-associated protein 5      | Abcc5         |
| NaN      | NaN      | NaN      | Q9WTR6;A0A0B4J1P7                 | Q9WTR6;A0A0B4J1P7                 | Cystine/glutamate transporter                  | Slc7a11       |
| NaN      | NaN      | 23.417   | Q9WUN2;A0A1W2P835                 | Q9WUN2;A0A1W2P835                 | Serine/threonine-protein kinase TBK1;Serine    | Tbk1          |
| 24.79947 | 24.91342 | 25.16039 | Q9WV27                            | Q9WV27                            | Sodium/potassium-transporting ATPase sub       | Atp1a4        |
| 23.50446 | 23.66492 | 23.36453 | Q9WV95                            | Q9WV95                            | Pleckstrin homology-like domain family A m     | Phlda3        |
| 25.74407 | 26.10149 | 26.05466 | Q9WV98;A0A1Y7VL11;A0A1Y7VIZ6      | Q9WV98;A0A1Y7VL11;A0A1Y7VIZ6      | Mitochondrial import inner membrane tran       | Timm9         |
| 23.57542 | 23.417   | 23.58692 | Q9WVA2;Q4FZG7                     | Q9WVA2;Q4FZG7                     | Mitochondrial import inner membrane tran       | Timm8a1;Timm  |
| 24.52253 | 24.01052 | 24.44884 | Q9WVC3                            | Q9WVC3                            | Caveolin-2                                     | Cav2          |
| 24.14102 | 23.78955 | 23.85757 | Q9Z0G0                            | Q9Z0G0                            | PDZ domain-containing protein GIPC1            | Gipc1         |
| 25.04009 | 24.95837 | 25.01478 | Q9Z0L8                            | Q9Z0L8                            | Gamma-glutamyl hydrolase                       | Ggh           |
| NaN      | NaN      | NaN      | Q9Z0P4;Q3UZP7;A0A1W2P831          | Q9Z0P4;Q3UZP7;A0A1W2P831          | Paralemmin-1;Paralemmin-1 (Fragment)           | Palm          |
| 24.53445 | 24.56964 | 24.58118 | Q9Z160                            | Q9Z160                            | Conserved oligomeric Golgi complex subunit     | Cog1          |
| 23.18707 | 23.1916  | 23.28207 | Q9Z179;A0A140LHA7                 | Q9Z179;A0A140LHA7                 | SHC SH2 domain-binding protein 1;SHC SH2       | Shcbp1        |
| 24.14102 | 24.32389 | 24.07725 | Q9Z1A1;B8JJG9;B8JJG7;B8JJG6;B8JJG | Q9Z1A1;B8JJG9;B8JJG7;B8JJG6;B8JJG | TFG protein;Trk-fused gene (Fragment)          | Tfg           |
| 22.86703 | 22.95305 | 23.16423 | Q9Z1W9                            | Q9Z1W9                            | STE20/SPS1-related proline-alanine-rich pro    | Stk39         |
| 24.17188 | 24.1332  | 23.46762 | Q9Z247                            | Q9Z247                            | Peptidyl-prolyl cis-trans isomerase FKBP9      | Fkbp9         |
| 23.0258  | NaN      | NaN      | Q9Z2L6                            | Q9Z2L6                            | Multiple inositol polyphosphate phosphatas     | Minpp1        |
| NaN      | 23.57542 | 23.64306 | Q9Z2N8;D3YVN1;A0A0A6YWG8          | Q9Z2N8;D3YVN1;A0A0A6YWG8          | Actin-like protein 6A;Actin-like protein 6A (F | Actl6a        |
| NaN      | NaN      | 20.56384 | Q9Z329;B2KF89                     | Q9Z329;B2KF89                     | Inositol 1,4,5-trisphosphate receptor type 2;  | Itp2r         |
| NaN      | NaN      | NaN      | S4R2E1;A0A0R4J0B6;Q7TMS5;D3YZX5;A | S4R2E1;A0A0R4J0B6;Q7TMS5;D3YZX5;A | ATP-binding cassette sub-family G member       | Abcg2         |
| NaN      | NaN      | 22.88762 | V9GXY4;P58801                     | V9GXY4;P58801                     | Receptor-interacting serine/threonine-prote    | Ripk2         |
| 23.09023 | 24.06085 | NaN      | Z4YK56;Q8K135;A2A786;A2A787;A2A7  | Z4YK56;Q8K135;A2A786;A2A787;A2A7  | Expressed sequence AU040320;Dyslexia-ass       | AU040320;Kiaa |
| 26.56092 | 26.56674 | 26.71293 | Z4YKQ9;Q4QY64                     | Z4YKQ9;Q4QY64                     | ATPase family AAA domain-containing prote      | Atad5         |
| 23.44253 | 23.97596 | NaN      | Z4YKT6;Q99J47                     | Z4YKT6;Q99J47                     | Dehydrogenase/reductase SDR family mem         | Dhrs7b        |
| 22.63423 | 22.08213 | NaN      | A0A087WPH7                        | A0A087WPH7                        | 26S proteasome regulatory subunit 6A (Frag     | Psmc3         |
| 22.72234 | 22.02918 | 21.71816 | A0A087WQ48;H7BWZ9;Q8BL99          | A0A087WQ48;H7BWZ9;Q8BL99          | Protein dopey-1                                | Dopey1        |
| 25.50142 | 25.61246 | NaN      | A0A087WRM2;Q91VK4                 | A0A087WRM2;Q91VK4                 | Integral membrane protein 2C                   | Itn2c         |
| 26.51803 | 26.52253 | 26.34096 | A0A087WRZ7;A0A0G2JDM3;E9PWG4;A0   | A0A087WRZ7;A0A0G2JDM3;E9PWG4;A0   | Myosin light chain 1/3, skeletal muscle isofo  | Myl1;Myl3     |
| 26.90885 | 27.16997 | 27.19835 | A0A087WSN6;B9EHT6;B7ZJN1          | A0A087WSN6;B9EHT6;B7ZJN1          | Fibronectin                                    | Fn1           |
| NaN      | NaN      | 25.77706 | A0A0A0MQ90;P97352                 | A0A0A0MQ90;P97352                 | Protein S100-A13                               | S100a13       |
| NaN      | NaN      | NaN      | A0A0A0MQN1;Q5RL79                 | A0A0A0MQN1;Q5RL79                 | Keratinoocyte associated protein 2, isoform    | Krtcap2       |
| 25.00624 | 24.48001 | 25.34435 | A0A0A6YVS2;Q921L3                 | A0A0A6YVS2;Q921L3                 | Calcium load-activated calcium channel (Fra    | Tmco1         |
| 24.94056 | 24.86703 | 24.89966 | A0A0A6YVX4;Q8CII2                 | A0A0A6YVX4;Q8CII2                 | Cell division cycle protein 123 homolog (Fra   | Cdc123        |
| 24.55215 | 24.81909 | NaN      | A0A0A6YW87;Q9CX13                 | A0A0A6YW87;Q9CX13                 | Cornichon homolog 4 (Drosophila), isoform      | Cnih4         |
| NaN      | NaN      | NaN      | A0A0A6YXC8;E9QKR1;A0A0A6YW06;J3C  | A0A0A6YXC8;E9QKR1;A0A0A6YW06;J3C  | Protein enabled homolog                        | Enah          |
| NaN      | NaN      | NaN      | A0A0A6YXG8;A0A0A6YVJ7;B2RXV4      | A0A0A6YXG8;A0A0A6YVJ7;B2RXV4      | Feline leukemia virus subgroup C receptor-r    | Flvcr1        |
| NaN      | NaN      | NaN      | A0A0G2JDX4;A0A0G2JEZ7;Q9D1X8;Q9   | A0A0G2JDX4;A0A0G2JEZ7;Q9D1X8;Q9   | Tetraspanin-2 (Fragment);Tetraspanin           | Tspan2        |
| 23.13163 | 22.90058 | 22.8423  | A0A0G2JE26;Q6DFX2                 | A0A0G2JE26;Q6DFX2                 | Anthrax toxin receptor 2                       | Antr2         |
| 21.77153 | 22.0258  | 22.14258 | A0A0G2JEC8;Q8C0M2;Q3U7M5;Q8VD6    | A0A0G2JEC8;Q8C0M2;Q3U7M5;Q8VD6    | Protein ABHD4 (Fragment);Protein ABHD4         | Abhd4         |

|          |          |          |                                   |                        |                                                    |                 |
|----------|----------|----------|-----------------------------------|------------------------|----------------------------------------------------|-----------------|
| NaN      | NaN      | NaN      | A0A0G2JEE5                        | A0A0G2JEE5             | T cell receptor alpha joining 50 (Fragment)        | Traj50          |
| 24.36453 | 24.48001 | 24.70767 | A0A0G2JEW0;A0A0G2JH13;Q8CJ26      | A0A0G2JEW0;A0A0G2JH1   | Death domain-containing membrane protein           | Nradd           |
| NaN      | 22.80538 | 22.03926 | A0A0G2JF52;Q9R0Q6;D3YV15          | A0A0G2JF52;Q9R0Q6;D3Y  | Actin related protein 2/3 complex, subunit 1       | Arpc1a          |
| NaN      | 22.69285 | NaN      | A0A0G2JGA4;A0A0G2JD19;P55096      | A0A0G2JGA4;A0A0G2JD19  | ATP-binding cassette sub-family D member           | Abcd3           |
| 21.48738 | NaN      | NaN      | A0A0G2JGP6;A0A0G2JEW6;D6RHK5;A0   | A0A0G2JGP6;A0A0G2JEW   | Cyclin-G-associated kinase                         | Gak;Ga          |
| NaN      | NaN      | NaN      | A0A0G2JGP8;Q9D710                 | A0A0G2JGP8;Q9D710      | Protein shisa-5                                    | Shisa5          |
| NaN      | NaN      | NaN      | A0A0G2JGR9;Q80VB6;A0A0G2JGQ6;Q9   | A0A0G2JGR9;Q80VB6;A0   | Serine/threonine-protein kinase DCLK1 (Frag        | Dclk1           |
| 26.65949 | 26.75175 | 26.92025 | A0A0G2JGU1;Q64302                 | A0A0G2JGU1;Q64302      | Transmembrane 4 L6 family member 1 (Frag           | Tm4sf1          |
| 22.89319 | 22.95837 | 22.90242 | A0A0G2JGY0;D3YWR7;A0A0G2JGJ1;Q8   | A0A0G2JGY0;D3YWR7;A0   | Dihydropteridine reductase                         | Qdpr;           |
| 22.81714 | 22.46513 | 22.90793 | A0A0J9YTY5;D3Y98;Q8VDS8           | A0A0J9YTY5;D3Y98;Q8V   | Syntaxin-18 (Fragment);Syntaxin-18                 | Stx18;          |
| 24.46762 | 24.33756 | 23.83846 | A0A0J9YUQ8;A0A0J9YUJ8             | A0A0J9YUQ8             | Gelsolin (Fragment)                                | Gsn             |
| 24.14102 | 24.2021  | 24.1488  | A0A0J9YUR9;Q3V3R8;A0A0J9YU11;A0A  | A0A0J9YUR9;Q3V3R8;A0   | Ubiquitin-conjugating enzyme E2 K (Fragme          | Ube2k           |
| 22.34028 | NaN      | 22.25061 | A0A0J9YUT8;Q8R3C6                 | A0A0J9YUT8;Q8R3C6      | Probable RNA-binding protein 19                    | Rbm19           |
| NaN      | 19.5545  | NaN      | A0A0N4SUH4;Q8BK59                 | A0A0N4SUH4;Q8BK59      | Pumilio homolog 3                                  | Pum3            |
| 23.44253 | 23.60964 | 23.01903 | A0A0N4SUT8;A0A0N4SVH5;A0A0N4SV    | A0A0N4SUT8;A0A0N4SVH   | Deoxyribose-phosphate aldolase (Fragment)          | Dera            |
| 22.64526 | 22.23608 | 22.74714 | A0A0N4SUZ3;Q6ZWM4                 | A0A0N4SUZ3;Q6ZWM4      | U6 snRNA-associated Sm-like protein Lsm8           | Lsm8            |
| NaN      | NaN      | NaN      | A0A0N4SVC2;E9QP00;Q6PFR5          | A0A0N4SVC2;E9QP00;Q6   | Transformer-2 protein homolog alpha                | Tra2a           |
| 21.55918 | 21.89874 | 22.21845 | A0A0N4SVC2;E9QP00;Q6PFR5          | A0A0N4SVC2;E9QP00;Q6   | FERM domain-containing protein 4B (Fragme          | Frmrd4b;Frmrd4a |
| NaN      | NaN      | NaN      | A0A0R4I2W9;Q9DCT5                 | A0A0R4I2W9;Q9DCT5      | Stromal cell-derived factor 2                      | Sdf2            |
| NaN      | NaN      | NaN      | A0A0R4J086;Q8BK62                 | A0A0R4J086;Q8BK62      | Olfactomedin-like protein 3                        | Olfml3          |
| NaN      | NaN      | NaN      | A0A0R4J0T2;Q504P2                 | A0A0R4J0T2;Q504P2      | C-type lectin domain family 12 member A            | Clec12a         |
| 22.69498 | 22.47754 | NaN      | A0A0R4J0T8;Q99K28;Q9D8S3          | A0A0R4J0T8;Q99K28;Q9D  | ADP-ribosylation factor GTPase-activating p        | Arfgap3;Arfgap1 |
| 22.56848 | 22.75328 | 22.36185 | A0A0R4J0U7;Q8R395                 | A0A0R4J0U7;Q8R395      | COMM domain-containing protein 5                   | Comm5d          |
| 24.01052 | 24.21697 | NaN      | A0A0R4J0W6;Q9CRC8                 | A0A0R4J0W6;Q9CRC8      | Leucine rich repeat containing 40, isoform C       | Lrrcc40         |
| 22.33484 | NaN      | 22.13946 | A0A0R4J131;Q8CIF4                 | A0A0R4J131;Q8CIF4      | Biotinidase                                        | Btd             |
| NaN      | NaN      | NaN      | A0A0R4J1K4;A0A0R4J1K9;A0A0R4J101; | A0A0R4J1K4;A0A0R4J1K9  | Anion exchange protein                             | Slc4a2;         |
| 24.81421 | 25.21327 | 25.07316 | A0A0R4J1L2;F6ZFU0;D3Z7N2          | A0A0R4J1L2;F6ZFU0;D3Z7 | Elongation factor 1-delta;Elongation factor 1      | Eef1d           |
| NaN      | NaN      | NaN      | A0A0R4J2D3;Q8BI84                 | A0A0R4J2D3;Q8BI84      | Transport and Golgi organization protein 1 (Fragme | Mia3            |
| 20.09507 | 19.86816 | NaN      | A0A0U1RNZ3;Q8C5X1                 | A0A0U1RNZ3;Q8C5X1      | RIKEN cDNA 4931406P16 gene                         | 4931406P16Rik   |
| NaN      | NaN      | NaN      | A0A0U1RP00;D6RGU1;A0A0U1RPB0;Q9   | A0A0U1RP00;D6RGU1;A0   | Nucleolysin TIAR;Nucleolysin TIAR (Fragmen         | Tiar1           |
| 22.58003 | 23.0476  | NaN      | A0A140LIC5;A0A140LHQ1;A0A140LHM1  | A0A140LIC5;A0A140LHQ1  | Gamma-secretase subunit PEN-2 (Fragment)           | Psenen          |
| NaN      | NaN      | NaN      | A0A1B0GSZ1;O35912                 | A0A1B0GSZ1;O35912      | Epithelial membrane protein 3 (Fragment);          | Emp3            |
| 23.29614 | 22.89134 | NaN      | A0A1B0GSZ9;O35972                 | A0A1B0GSZ9;O35972      | 39S ribosomal protein L23, mitochondrial           | Mrlp23          |
| NaN      | NaN      | NaN      | A0A1C7CYU4;A0A1B0GRC2;Q64704      | A0A1C7CYU4;A0A1B0GRC   | Syntaxin-3                                         | Stx3            |
| 21.0559  | 20.75532 | 20.65403 | A0A1D5RLK1;Q8C3S2                 | A0A1D5RLK1;Q8C3S2      | Transport and Golgi organization protein 6 (Fragme | Tango6          |
| 24.2021  | NaN      | NaN      | A0A1D5RZL6;Q9DCC8                 | A0A1D5RZL6;Q9DCC8      | Mitochondrial iron receptor subunit TOM            | Tom20           |
| NaN      | NaN      | NaN      | A0A1D5RM41;A0A0A6YXX3;A0A0A6YXX   | A0A1D5RM41;A0A0A6YXX   | Lipopolysaccharide-responsive and beige-like       | Lrba            |
| NaN      | NaN      | NaN      | A0A1L1SQA2;Q9CQV1                 | A0A1L1SQA2;Q9CQV1      | Predicted gene 9803;Mitochondrial import           | Gm9803;Pam1f    |
| NaN      | NaN      | NaN      | A0A1L1SQC5;F7ATH5;Q8R2Y2          | A0A1L1SQC5;F7ATH5;Q8R  | Cell surface glycoprotein MUC18 (Fragment)         | Mcam            |
| NaN      | NaN      | NaN      | A0A1L1SS76;Q8BH57                 | A0A1L1SS76;Q8BH57      | WD repeat-containing protein 48 (Fragment)         | Wdr48           |
| NaN      | NaN      | NaN      | A0A1L1SSA8;Q91XE8                 | A0A1L1SSA8;Q91XE8      | Transmembrane protein 205 (Fragment);Tra           | Tmem205         |
| 23.42982 | 23.00539 | 23.45513 | A0A1L1SSV6;A0A1L1SST5;Q9CQC8      | A0A1L1SSV6;A0A1L1SST5  | Maspartin (Fragment);Maspartin                     | Spg21           |
| 25.26069 | 25.46762 | 25.29263 | A0A1L1SUU4;Q9ERN0                 | A0A1L1SUU4;Q9ERN0      | Secretory carrier-associated membrane protein      | Scamp2          |
| NaN      | 24.94056 | 25.71293 | A0A1W2P6G5                        | A0A1W2P6G5             | Myosin light polypeptide 6                         | Myl6            |
| 28.68979 | 27.95947 | 26.19648 | A0A1W2P768;P84228                 | A0A1W2P768;P84228      | Histone H3.2                                       | Hist2h3c1;Hist1 |
| 20.28771 | NaN      | NaN      | A0A1W2P7G3;P23950                 | A0A1W2P7G3;P23950      | mRNA decay activator protein ZFP36L1               | Zfp36l1         |
| 22.81519 | 23.03086 | 23.46762 | A0A1Y7VM38;P52503                 | A0A1Y7VM38;P52503      | NADH dehydrogenase [ubiquinone] iron-sulf          | Ndufs6          |
| NaN      | NaN      | NaN      | A0A1Y7VMF7;O89016                 | A0A1Y7VMF7;O89016      | ATP-binding cassette sub-family D member           | Abcd4           |
| NaN      | NaN      | NaN      | A0A286YD04;A0A286YE98;A0A286YDT   | A0A286YD04;A0A286YE98  | Tight junction-associated protein 1 (Fragmen       | Tjap1           |
| NaN      | NaN      | NaN      | A0A286YDS2;A0A286YDF6;BOV2N1      | A0A286YDS2;A0A286YDF6  | Receptor-type tyrosine-protein phosphatase         | Ptprs           |
| NaN      | NaN      | NaN      | A2A4J3;A2A4J1;P61290              | A2A4J3;A2A4J1;P61290   | Proteasome activator complex subunit 3 (Fragme     | Psme3           |
| 23.2535  | 22.87643 | 22.84805 | A2A6M1;Q9CZ28                     | A2A6M1;Q9CZ28          | Vacuolar-sorting protein SNF8                      | Snf8            |
| 27.60399 | 27.56819 | 27.55362 | A2A934;A2A930;A2A931;A2A933;A2A9  | A2A934;A2A930;A2A931;  | PR domain zinc finger protein 16                   | Prdm16          |
| NaN      | 23.59833 | 23.50446 | A2A9X5;Q9JM14                     | A2A9X5;Q9JM14          | 5(3)-deoxyribonucleotidase, cytosolic type         | Nt5c            |
| NaN      | 23.46762 | 23.6971  | A2AD03;Q9XQG2                     | A2AD03;Q9XQG2          | Rab proteins geranylgeranyltransferase com         | Chm             |
| 22.17341 | 23.55215 | 22.31008 | A2AEG3;A2AEG6;P35803              | A2AEG3;A2AEG6;P35803   | Glycoprotein mb6, isoform CRA_a;Glycopro           | Gpm6b           |
| NaN      | NaN      | NaN      | A2AQJ7;A2AQJ5;A2AQJ6;Q8BXN9       | A2AQJ7;A2AQJ5;A2AQJ6   | Transmembrane protein 87A                          | Tmem87a         |
| 23.28207 | 23.2535  | 22.91707 | A2ASW6;Q9ESL4                     | A2ASW6;Q9ESL4          | Mitogen-activated protein kinase kinase kinase     | Map3k20         |
| NaN      | NaN      | 25.26428 | A2AUF7;BOR0S4                     | A2AUF7;BOR0S4          | Rab9 effector protein with kelch motifs            | Rabepk          |
| NaN      | NaN      | NaN      | A6H5X4                            | A6H5X4                 | PHD finger protein 11                              | Phf11           |
| NaN      | NaN      | 22.50203 | A6H630                            | A6H630                 | Protein-glutamate O-methyltransferase              | Armt1           |
| 22.97771 | NaN      | 22.98989 | A7YY80;Q9WV92;A0A286YDY4;A0A286   | A7YY80;Q9WV92;A0A286   | 130kDa Protein 4.1B MEF cell isoform;Band          | Epb413          |
| 23.57542 | 23.56384 | 23.1946  | A8Y5H7                            | A8Y5H7                 | SEC14-like protein 1                               | Sec14i1         |
| NaN      | NaN      | NaN      | B1AR50;Q9DCD6                     | B1AR50;Q9DCD6          | Gamma-aminobutyric acid receptor-associated        | Gabarap         |
| 23.01733 | NaN      | 22.45764 | B1ASW5;B1ASW6;Q5NCF2              | B1ASW5;B1ASW6;Q5NCF2   | Trafficking protein particle complex 1, isoform    | Trappc1         |
| 23.68646 | NaN      | NaN      | B1AU99;B1AUZ1;Q3V4D5;B1AU97;Q9Q   | B1AU99;B1AUZ1;Q3V4D5   | N-alpha-acetyltransferase 10                       | Naa10           |
| NaN      | NaN      | 23.417   | B1AVZ0                            | B1AVZ0                 | Uracil phosphoribosyltransferase homolog           | Uprt            |
| NaN      | NaN      | NaN      | B1BOC7                            | B1BOC7                 | Basement membrane-specific heparan sulfat          | Hspg2           |
| 24.93607 | 24.26069 | 24.65403 | B2RXS8;B9EKR1                     | B2RXS8;B9EKR1          | Ptprz1 protein;Receptor-type tyrosine-prote        | Ptprz1          |
| NaN      | 23.65403 | NaN      | B7ZCB8;F7CJY7;F6X4N5;Q8BV15       | B7ZCB8;F7CJY7;F6X4N5;Q | Syntaxin-16 (Fragment);Syntaxin-16                 | Stx16           |
| NaN      | NaN      | NaN      | B8ZXI1                            | B8ZXI1                 | Queuine tRNA-ribosyltransferase accessory          | Qtrt2           |
| 24.20955 | 23.67573 | 23.50446 | D3YU76;Q91V77                     | D3YU76;Q91V77          | Protein S100-A1;Protein S100                       | S100a1          |
| 24.49838 | 24.73892 | NaN      | D3YV69                            | D3YV69                 | Ras-related protein Rab-6A                         | Rab6a           |
| NaN      | NaN      | NaN      | D3YVH4;E9Q4Q2;D3YZC9;D3YZD0;Q64   | D3YVH4;E9Q4Q2;D3YZC9;  | Splicing factor 1 (Fragment);Splicing factor 1     | Sf1             |
| 23.17493 | 23.49228 | 23.01393 | D3YVQ6;P35292                     | D3YVQ6;P35292          | Ras-related protein Rab-17 (Fragment);Ras-         | Rab17           |
| NaN      | NaN      | NaN      | D3YVV4;Q99KR8                     | D3YVV4;Q99KR8          | Plasma alpha-L-fucosidase (Fragment);Plasm         | Fuca2           |
| NaN      | NaN      | NaN      | D3YXA7;Q9CCK4                     | D3YXA7;Q9CCK4          | Sugar transporter SWEET1                           | Slc50a1         |
| NaN      | NaN      | NaN      | D3YZC1;E9QJ17;Q99MN9              | D3YZC1;E9QJ17;Q99MN9   | Propionyl-CoA carboxylase beta chain, mito         | Pccb            |
| 23.51653 | 23.59833 | NaN      | D3Z0J2;P51637                     | D3Z0J2                 | Caveolin (Fragment)                                | Cav1            |
| 23.50446 | 23.01563 | 23.00367 | D3Z0Z6;D3Z136;Q8BHI7              | D3Z0Z6;D3Z136;Q8BHI7   | Elongation of very long chain fatty acids pro      | Elovl5          |
| 22.239   | 22.99828 | 21.76344 | D3Z1H8;D3Z1H9;Q9JL62              | D3Z1H8;D3Z1H9;Q9JL62   | Glycolipid transfer protein                        | Gltp            |
| NaN      | 23.94949 | 25.26428 | D3Z494;G5E895;S4R2G9              | D3Z494;G5E895          | Aldo-keto reductase family 1, member B10           | Akr1b10         |
| 23.95837 | 23.29614 | NaN      | D3Z568;F6Y6V5;D3YX99;D3Z6W9;Q9C   | D3Z568;F6Y6V5;D3YX99;D | NADH dehydrogenase (Ubiquinone) 1 beta s           | Ndurf5          |
| 22.97946 | 23.09184 | 23.13477 | D3Z5Y5;D3YX12;A0A0A6YXR0;Q8BGS7   | D3Z5Y5;D3YX12;A0A0A6Y  | Choline/ethanolaminephosphotransferase 1           | Cept1           |
| NaN      | NaN      | NaN      | D3Z795;Q9JK23                     | D3Z795;Q9JK23          | Proteasome assembly chaperone 1                    | Psmg1           |
| 22.15808 | 22.7265  | 22.97771 | D3Z7E5;Q2NLS1                     | D3Z7E5;Q2NLS1          | Glycogen synthase kinase-3 alpha                   | Gsk3a           |
| 23.50446 | 23.21697 | 23.51653 | D3Z7J6;D3Z487;Q99LD9              | D3Z7J6;D3Z487;Q99LD9   | Translation initiation factor eIF-2B subunit b     | Eif2b2          |
| 22.71607 | 23.1916  | 23.78955 | D3Z7J7;D3Z6Y9;Q99LN9              | D3Z7J7;D3Z6Y9;Q99LN9   | Deoxyhypusine hydroxylase (Fragment);Deo           | Dohh            |

|          |          |          |                                    |                                    |                                                |                |
|----------|----------|----------|------------------------------------|------------------------------------|------------------------------------------------|----------------|
| 24.71293 | 24.45513 | 24.42342 | D3Z7P2;D3Z3Z2;D3YX08;D3Z0I8;Q3UBX  | D3Z7P2;D3Z3Z2;D3YX08;D3Z0I8;Q3UBX  | Transmembrane protein 109 (Fragment);Trm       | Tmem109        |
| NaN      | NaN      | 22.94235 | D6RGM3;E9QK48;Q7TNG5               | D6RGM3;E9QK48;Q7TNG5               | Echinoderm microtubule-associated protein      | Eml2           |
| 22.09184 | 22.00196 | 21.89134 | D6RGR3;D3Z0L3;Q3T9A5;Q8BZM1        | D6RGR3;D3Z0L3;Q3T9A5;Q8BZM1        | Glomulin;Glomulin (Fragment)                   | Glmn           |
| NaN      | NaN      | NaN      | D6RI83;D3Z0S6;Q62189               | D6RI83;D3Z0S6;Q62189               | U1 small nuclear ribonucleoprotein A;U1 sm     | Snrpa          |
| NaN      | NaN      | NaN      | D6RIP0;D6RHN4;Q3UXD9;Q99MZ7        | D6RIP0;D6RHN4;Q3UXD9;Q99MZ7        | Peroxisomal trans-2-enoyl-CoA reductase        | Pecr           |
| 23.64306 | 24.1332  | 24.57542 | E0CXB9;Q61301;Q8B572               | E0CXB9;Q61301;Q8B572               | Catenin alpha-2;Catenin (Cadherin associate    | Ctnna2;        |
| 21.54981 | NaN      | NaN      | E0CXM9;Q9DB43                      | E0CXM9;Q9DB43                      | Zinc finger protein-like 1 (Fragment);Zinc fin | Zfp1           |
| 20.98815 | 20.62756 | NaN      | E0CXW7;E9QMF4;A0A0R4J1Y3           | E0CXW7;E9QMF4;A0A0R4J1Y3           | Probable tRNA N6-adenosine threonylcarba       | Osgpe          |
| NaN      | NaN      | NaN      | E0CYI5;Q6S9I0;Q6S9I2;Q6S9I3        | E0CYI5;Q6S9I0;Q6S9I2;Q6S9I3        | Kininogen 2;HMW-kininogen-II variant           | Kng2           |
| 22.61863 | 22.43492 | 21.6584  | E0CYQ4;E0CX64;H3BK26;P49442        | E0CYQ4;E0CX64;H3BK26;P49442        | Inositol polyphosphate 1-phosphatase (Frag     | Inpp1          |
| 27.87408 | 27.99226 | 26.09144 | E0CZ27;P84244;P02301;F8WI35;EOCYN  | E0CZ27;P84244;P02301;F8WI35;EOCYN  | Histone H3 (Fragment);Histone H3.3;Histone     | H3f3a;H3f3c    |
| NaN      | 23.36453 | 23.391   | E9PYB0                             | E9PYB0                             | AHNAK nucleoprotein 2 (Fragment)               | Ahnak2         |
| NaN      | NaN      | NaN      | E9PYD5;P10711                      | E9PYD5;P10711                      | Transcription elongation factor A protein 1    | Tcea1          |
| 25.29964 | 25.60682 | 25.60682 | E9PZD8;Q61147                      | E9PZD8;Q61147                      | Ceruloplasmin                                  | Cp             |
| NaN      | NaN      | NaN      | E9Q066;G3X9Q6;Q8BWW4               | E9Q066;G3X9Q6;Q8BWW4               | La-related protein 4                           | Larp4          |
| 23.50446 | 23.21401 | 23.66492 | E9Q0G1;Q9CQJ6                      | E9Q0G1;Q9CQJ6                      | Density-regulated protein (Fragment);Densit    | Denr           |
| NaN      | NaN      | NaN      | E9Q0T4;E9PWQ9;Q91YZ2;P56546        | E9Q0T4;E9PWQ9;Q91YZ2;P56546        | C-terminal-binding protein 2 (Fragment)        | Ctbp2          |
| NaN      | NaN      | NaN      | E9Q1Y3;E9Q414                      | E9Q1Y3;E9Q414                      | Apolipoprotein B-100 (Fragment);Apolipopro     | Apob           |
| 22.80931 | 23.29614 | 22.94771 | E9Q2H8;E9PYA3;A0A0R4J052;G5E8T9;   | E9Q2H8;E9PYA3;A0A0R4J052;G5E8T9;   | Hydroxyacylglutathione hydrolase, mitochon     | Hagh           |
| NaN      | 26.11942 | NaN      | E9Q3T0                             | E9Q3T0                             | Predicted pseudogene 10073                     | Gm10073        |
| 23.13477 | 22.59377 | NaN      | E9Q3X0;D3Z2N7                      | E9Q3X0                             | Major vault protein                            | Mvp            |
| 21.36986 | 22.13946 | NaN      | E9Q411                             | E9Q411                             | Neuroblastoma-amplified sequence               | Nbas           |
| NaN      | NaN      | NaN      | E9Q6P5;A0A1Y7VL44                  | E9Q6P5;A0A1Y7VL44                  | Tetratricopeptide repeat protein 7B            | Ttc7b          |
| 23.95837 | 23.55215 | 23.75939 | E9Q704;F8VQA4;P97467               | E9Q704;F8VQA4;P97467               | Peptidyl-glycine alpha-amidating monooxyg      | Pam            |
| NaN      | NaN      | NaN      | E9Q8N5;Q08EB6;Q08EB5;F7DCH5;Q8B    | E9Q8N5;Q08EB6;Q08EB5;F7DCH5;Q8B    | CLIP-associating protein 2                     | Clasp2         |
| NaN      | NaN      | NaN      | E9Q9A9                             | E9Q9A9                             | 2-5-oligoadenylate synthase 2                  | Oas2           |
| NaN      | NaN      | NaN      | E9QAY1;Q8K4F6                      | E9QAY1;Q8K4F6                      | Probable 28S rRNA (cytosine-C(5))-methyltr     | Nsun5          |
| 23.36453 | 23.417   | 23.62087 | E9QLL2;Q8BZ98;D6RH60;F2Z460;EOCX2  | E9QLL2;Q8BZ98                      | Dynamin-3                                      | Dnm3           |
| 24.53445 | NaN      | NaN      | E9QLR3                             | E9QLR3                             | Lysosomal-associated transmembrane prote       | Laptm4a        |
| NaN      | NaN      | 22.12692 | E9QLZ0;Q8BMC3;P98083               | E9QLZ0;Q8BMC3;P98083               | MCG18215;SHC-transforming protein 2;SHC        | Lhc2;Shc1      |
| NaN      | NaN      | NaN      | F6SFF5;Q8K1Z0                      | F6SFF5;Q8K1Z0                      | Ubiquinone biosynthesis protein COQ9, mitc     | Coq9           |
| NaN      | 24.239   | NaN      | F6TWM7;F8WJA1;P97808               | F6TWM7;F8WJA1;P97808               | FXD domain-containing ion transport regul      | Fxyd5          |
| 21.57773 | 21.45764 | 21.06907 | F6ULQ4;Q3U141;A0A0R4J0T4;Q5D0E0;   | F6ULQ4;Q3U141;A0A0R4J0T4;Q5D0E0;   | Inhibitor of nuclear factor kappa-B kinase su  | Ikbkb          |
| 24.32389 | 24.78457 | 24.46762 | F6VVP8                             | F6VVP8                             | Galectin-3-binding protein (Fragment)          | Lgals3bp       |
| 25.82153 | 26.27853 | 25.92479 | F6VSK8                             | F6VSK8                             | Integrin alpha-6 (Fragment)                    | Iltga6         |
| NaN      | NaN      | NaN      | F6XLZ3;D3Z3S1;Q9WUQ2               | F6XLZ3;D3Z3S1;Q9WUQ2               | Prolactin regulatory element-binding protei    | Preb           |
| NaN      | NaN      | NaN      | F6Z9X8;Q8CIE4                      | F6Z9X8;Q8CIE4                      | Poly [ADP-ribose] polymerase (Fragment);PC     | Parp10         |
| NaN      | NaN      | 21.48738 | F6ZZ61;Q3URQ0                      | F6ZZ61;Q3URQ0                      | Testis-expressed protein 10 (Fragment);Test    | Tex10          |
| NaN      | NaN      | 24.03591 | F7AI87                             | F7AI87                             | 26S proteasome non-ATPase regulatory sub       | Psm4           |
| 21.66275 | 20.90976 | 21.35917 | F7B209;Q80UP5;Q6PD24               | F7B209;Q80UP5;Q6PD24               | Ankyrin repeat domain-containing protein 1     | Ankrd13a       |
| 24.09346 | 24.10949 | 24.06907 | F7BWT7                             | F7BWT7                             | Tetraspanin-15                                 | Tspan15        |
| 23.46762 | 23.6971  | 23.44253 | F8WGB3;Q9CZB0                      | F8WGB3;Q9CZB0                      | Succinate dehydrogenase cytochrome b560        | Sdhc           |
| NaN      | NaN      | NaN      | F8WHG5;Q60823                      | F8WHG5;Q60823                      | RAC-beta serine/threonine-protein kinase       | Akt2           |
| 24.36453 | 24.57542 | 24.28207 | F8WHU8;Q9D8T7                      | F8WHU8;Q9D8T7                      | SRA stem-loop-interacting RNA-binding prot     | Slirp          |
| 23.31008 | 24.74919 | 23.37782 | F8WI55;Q8VE70                      | F8WI55;Q8VE70                      | Programmed cell death protein 10               | Pdcd10         |
| NaN      | 22.35649 | 22.22435 | F8WI56;D3Z7D3;Q8BWT5               | F8WI56;D3Z7D3;Q8BWT5               | Disco-interacting protein 2 homolog A          | Dip2a          |
| 24.239   | 24.28912 | 24.53445 | G3UX99;G3UZY2;A2A439;P97493        | G3UX99;G3UZY2;A2A439;P97493        | Thioredoxin, mitochondrial (Fragment);Thio     | Txn2           |
| 23.21845 | 23.07725 | 22.94414 | G3UXB5;G3XA75;G3UX99;G3XA66;D3Z    | G3UXB5;G3XA75;G3UX99;G3XA66;D3Z    | Metaxin-1 (Fragment)                           | Mtx1           |
| 21.77555 | NaN      | NaN      | G3UYD5;G3UX23;Q3UW64;Q91WG8        | G3UYD5;G3UX23;Q3UW64;Q91WG8        | Bifunctional UDP-N-acetylglucosamine 2-epi     | Gne            |
| 23.45513 | 23.40406 | 23.48001 | G3UZX6;H7BWX9;D3Z794;G3UZ60;G3U    | G3UZX6;H7BWX9;D3Z794;G3UZ60;G3U    | Small ubiquitin-related modifier 3 (Fragment   | Sumo3;Sumo2    |
| 20.90976 | 20.92434 | 20.92434 | G3X8P9;O54754                      | G3X8P9;O54754                      | Aldehyde oxidase 1                             | Aox1           |
| 21.75532 | 21.29894 | NaN      | G3X8S1;Q9CQV7                      | G3X8S1;Q9CQV7                      | DnaJ (Hsp40) homolog, subfamily C, membe       | Dnajc19        |
| 23.46762 | 23.60964 | 23.60964 | G3X909;G3UY21;A0A140T8T2;G3UYX7;   | G3X909;G3UY21;A0A140T8T2;G3UYX7;   | Slit homolog 2 protein                         | Slit2          |
| NaN      | NaN      | NaN      | G3X9I1;G5E911;Q91VU0               | G3X9I1;G5E911;Q91VU0               | DNA segment, Chr 6, Wayne State Universi       | Fam3c          |
| 22.15808 | 21.9061  | 21.83846 | G3X9I4;Q9JJW6;O08583               | G3X9I4;Q9JJW6;O08583               | Aly/REF export factor 2;THO complex subun      | Alyref         |
| NaN      | NaN      | NaN      | G5E814;Q9D8B4                      | G5E814;Q9D8B4                      | MCG5603;NADH dehydrogenase [ubiquinon]         | Ndufa11        |
| 24.78955 | 25.37119 | 25.43936 | G5E8N3;D3YVC3;O88974               | G5E8N3;D3YVC3;O88974               | Histone-lysine N-methyltransferase             | Setd1          |
| 23.70767 | 23.5285  | 23.11902 | G5E8R4;Q922D4                      | G5E8R4;Q922D4                      | SAPS domain family, member 3, isoform CRA      | Ppp6r3         |
| NaN      | NaN      | NaN      | H3BJI7;Q8C6B0;Q76I24;Q5I0W6;Q76I26 | H3BJI7;Q8C6B0;Q76I24;Q5I0W6;Q76I26 | Methyltransferase hypoxia-inducible domai      | Methig1;Mettl7 |
| NaN      | NaN      | 23.54038 | H3BJY1;H3BJ78;H3BK4;H3BI28;BOQZP8  | H3BJY1;H3BJ78;H3BK4;H3BI28;BOQZP8  | Synaptogyrin-2;Synaptogyrin-2 (Fragment);F     | Syng2;Gm2070   |
| 22.20359 | 24.27259 | 23.29614 | H3BK73;P0C7W3;Q8R1J9               | H3BK73;P0C7W3;Q8R1J9               | Prosalusin (Fragment);Prosalusin;Torsin-2A     | Tor2a          |
| 24.33074 | 24.26069 | 24.30313 | H3BLI9;D3YW86;D3Z0V7;E9QLZ1;P625   | H3BLI9;D3YW86;D3Z0V7;E9QLZ1;P625   | TSC22 domain family protein 1                  | Tsc22d1;T      |
| 24.26785 | 24.34435 | 24.1488  | H7BWZ1;D3YW97;P61961               | H7BWZ1;D3YW97;P61961               | Ubiquitin-fold modifier 1                      | Ufm1           |
| NaN      | NaN      | NaN      | H9KV05;Q99JN2                      | H9KV05;Q99JN2                      | Kelch-like protein 22                          | Klhl22         |
| NaN      | NaN      | 23.37782 | I7HJ51;O08579                      | I7HJ51;O08579                      | Emerin                                         | Emer           |
| 22.9619  | 23.21252 | 23.0476  | J3QMV5;Q9Z2L7                      | J3QMV5;Q9Z2L7                      | Cytokine receptor-like factor 3                | Crlf3          |
| 23.59833 | 23.26785 | 23.66492 | J3QNW4;Q3TIR1                      | J3QNW4;Q3TIR1                      | Trafficking protein particle complex subunit   | Trappc13       |
| 24.01052 | 23.68646 | 24.1332  | J3QNY6;Q9QY30                      | J3QNY6;Q9QY30                      | Bile salt export pump                          | Abcn11         |
| 28.30226 | 28.21234 | 28.15557 | K3W4R2;Q6URW6;A0A140LI60           | K3W4R2;Q6URW6                      | Myosin-14                                      | Miy14          |
| NaN      | 23.26785 | 23.1961  | MOQWJ2;A0A087WQM3;MOQWQ0;B2        | MOQWJ2;A0A087WQM3;MOQWQ0;B2        | Ribulose-phosphate 3-pimerase                  | Rpe            |
| 24.42982 | 24.88577 | 25.72858 | O08792                             | O08792                             | Transcription factor COE2                      | Ebf2           |
| 23.56384 | 24.21697 | 23.79947 | O09117                             | O09117                             | Synaptophysin-like protein 1                   | Syp1           |
| 22.99162 | 23.417   | 22.73066 | O09118                             | O09118                             | Netrin-1                                       | Ntn1           |
| NaN      | NaN      | NaN      | O35657                             | O35657                             | Sialidase-1                                    | Neu1           |
| NaN      | NaN      | NaN      | O35841                             | O35841                             | Apoptosis inhibitor 5                          | Api5           |
| NaN      | 24.26069 | 23.85757 | O35901;O35900                      | O35901;O35900                      | U6 snRNA-associated 5m-like protein LSm2       | Lsm2           |
| 21.71398 | NaN      | NaN      | O35954                             | O35954                             | Membrane-associated phosphatidylinositol       | Pitpnm1        |
| 26.22986 | 26.2553  | 27.13124 | O55112                             | O55112                             | AF4/FMR2 family member 2                       | Aff2           |
| NaN      | NaN      | NaN      | O55188                             | O55188                             | Dentin matrix acidic phosphoprotein 1          | Dmp1           |
| 25.16039 | 24.79452 | 24.96279 | O70274                             | O70274                             | Protein tyrosine phosphatase type IVA 2        | Ptp4a2         |
| NaN      | NaN      | NaN      | O70514                             | O70514                             | Fibroblast growth factor-binding protein 1     | Fgfbp1         |
| NaN      | NaN      | NaN      | P04223                             | P04223                             | H-2 class I histocompatibility antigen, K-K al | H2-K1          |
| 27.33245 | 27.32389 | 27.24445 | P11276                             | P11276                             | Fibronectin                                    | Fn1            |
| NaN      | NaN      | NaN      | P14824                             | P14824                             | Annexin A6                                     | Anxa6          |
| 22.96367 | 22.52612 | 22.13006 | P15208                             | P15208                             | Insulin receptor                               | Insr           |
| 29.17236 | 28.50142 | 29.15557 | P15919                             | P15919                             | V(D)J recombination-activating protein 1       | Rag1           |
| 23.59833 | 23.40406 | 24.12534 | P24549;O35945;A0A286YDG6;A0A286Y   | P24549;O35945;A0A286YDG6;A0A286Y   | Retinal dehydrogenase 1;Aldehyde dehydro       | Aldh1a1;Aldh1a |
| 24.08537 | 24.08537 | NaN      | P31650                             | P31650                             | Sodium- and chloride-dependent GABA tran       | Slc6a11        |

|          |          |          |                                    |                         |                                                  |                   |
|----------|----------|----------|------------------------------------|-------------------------|--------------------------------------------------|-------------------|
| NaN      | NaN      | NaN      | P32037                             | P32037                  | Solute carrier family 2, facilitated glucose tra | Slc2a3            |
| 26.32732 | 26.22619 | 26.1488  | P35276;D3YW1;D3YW33                | P35276;D3YW1;D3YW33     | Ras-related protein Rab-3D;Ras-related prot      | Rab3d             |
| 23.58692 | 23.80931 | 23.82881 | P35821                             | P35821                  | Tyrosine-protein phosphatase non-receptor        | Ptpn11            |
| 24.78955 | 24.23169 | 25.13712 | P47757;A0A0A0MQI9;F6YH28           | P47757;A0A0A0MQI9;F6Y   | F-actin-capping protein subunit beta;F-actin     | Capzb             |
| 21.47754 | 21.59605 | 22.86703 | P53395                             | P53395                  | Lipoamide acyltransferase component of bra       | Dbt               |
| NaN      | NaN      | NaN      | P54763                             | P54763                  | Ephrin type-B receptor 2                         | Ephb2             |
| 25.23535 | 25.31354 | 25.31008 | P55821                             | P55821                  | Stathmin-2                                       | Stmn2             |
| NaN      | NaN      | NaN      | P56564                             | P56564                  | Excitatory amino acid transporter 1              | Slc1a3            |
| 22.75939 | 22.66709 | 24.49838 | P58854                             | P58854                  | Gamma-tubulin complex component 3                | Tubgcp3           |
| NaN      | 22.93697 | 22.49228 | P60060                             | P60060                  | Protein transport protein Sec61 subunit gam      | Sec61g            |
| 29.19835 | 29.05827 | 28.79266 | P60710;E9Q1F2;E9Q5F4;G3UZ07;E9Q6   | P60710;E9Q1F2;E9Q5F4;G  | Actin, cytoplasmic 1;Actin, cytoplasmic 1 (Fr    | Actb              |
| 23.31008 | 23.04427 | NaN      | P61166                             | P61166                  | Transmembrane protein 258                        | Tmem258           |
| 22.98989 | 22.74919 | 22.56384 | P62307                             | P62307                  | Small nuclear ribonucleoprotein F                | Snrpf             |
| 23.99335 | 23.91342 | 23.79947 | P62737;P63268;D3ZY0;D3Z2K3;A0A0U   | P62737;P63268;D3ZY0     | Actin, aortic smooth muscle;Actin, gamma-e       | Acta2;Actg2       |
| 24.60399 | 24.27498 | 24.55215 | P62821                             | P62821                  | Ras-related protein Rab-1A                       | Rab1A             |
| NaN      | 25.64581 | 25.79203 | P62892                             | P62892                  | 60S ribosomal protein L39                        | Rpl39             |
| 24.62087 | 24.77957 | 24.42982 | P63011;D3YZP5                      | P63011;D3YZP5           | Ras-related protein Rab-3A;Ras-related prot      | Rab3a             |
| 25.74919 | 25.77957 | 25.54333 | P68373;Q9JJ2                       | P68373;Q9JJ2            | Tubulin alpha-1C chain;Tubulin alpha-8 chain     | Tuba1c;Tuba8      |
| 22.94056 | 22.77555 | 22.91889 | P97346                             | P97346                  | Nucleoredoxin                                    | Nxn               |
| 21.47754 | NaN      | 18.08472 | Q31093                             | Q31093                  | Histocompatibility 2, M region locus 3           | H2-M3             |
| NaN      | 21.44253 | NaN      | Q3TAA8                             | Q3TAA8                  | Phosphatidylinositol glycan anchor biosynth      | Pigu              |
| NaN      | NaN      | NaN      | Q3TBT3                             | Q3TBT3                  | Stimulator of interferon genes protein           | Tmem173           |
| 24.99335 | 25.22435 | 25.48308 | Q3TIR6;P61759                      | Q3TIR6;P61759           | Prefoldin subunit 3                              | Vbp1              |
| NaN      | NaN      | NaN      | Q3TSS7;P52019                      | Q3TSS7;P52019           | Squalene monooxygenase                           | Sqle              |
| 26.69975 | 26.78955 | 24.76446 | Q3TYJ3;D3Z0M6;O88485               | Q3TYJ3;D3Z0M6;O88485    | Cytoplasmic dynein 1 intermediate chain 1        | Dync11            |
| 24.11744 | 24.01903 | 23.57542 | Q3TYS2                             | Q3TYS2                  | Uncharacterized protein C17orf62 homolog         |                   |
| 25.5285  | 25.56384 | NaN      | Q3U0J8                             | Q3U0J8                  | TBC1 domain family member 2B                     | Tbc1d2b           |
| 23.64306 | 23.99335 | 23.88577 | Q3U3W2                             | Q3U3W2                  | Transmembrane protein 181A                       | Tmem181a          |
| NaN      | NaN      | NaN      | Q3U687;E9PXF7;D3Z6F0               | Q3U687;E9PXF7;D3Z6F0    | Interferon-induced protein with tetratricope     | Iffit1b1;Iffit1b1 |
| 26.76446 | 26.68646 | 26.57109 | Q3UHD9                             | Q3UHD9                  | Arf-GAP with GTPase, ANK repeat and PH do        | Agap2             |
| 22.29334 | 22.6006  | NaN      | Q3UHH1                             | Q3UHH1                  | Zinc finger SWIM domain-containing protein       | Zswim8            |
| NaN      | 24.21697 | NaN      | Q3UI43                             | Q3UI43                  | BRISC and BRCA1-A complex member 1               | Babam1            |
| 23.70767 | 23.63201 | NaN      | Q3UI84;Q99J62                      | Q3UI84;Q99J62           | Replication factor C subunit 4                   | Rfc4              |
| 22.86136 | NaN      | 22.55918 | Q3UN00;F8W193;Q9Z1M0               | Q3UN00;F8W193;Q9Z1M0    | P2X purinoceptor;p2X purinoceptor;p2X pur        | P2rx7             |
| 22.37782 | 22.23608 | NaN      | Q3UNN4;Q3UID0;P97496;Q6PDG5        | Q3UNN4;Q3UID0;P97496    | SWI/SNF complex subunit SMARCC1;SWI/SN           | Smarrcc1;Smarrc   |
| NaN      | NaN      | NaN      | Q45VK5;A0A111STE4;Q9Z1X4           | Q45VK5;A0A111STE4;Q9Z   | Interleukin enhancer-binding factor 3            | Ilf3              |
| NaN      | NaN      | NaN      | Q4PZA2                             | Q4PZA2                  | Endothelin-converting enzyme 1                   | Ece1              |
| NaN      | 21.80735 | NaN      | Q52KR6;B8JJ92;B8JJ91;F6RJ39;Q9JIX8 | Q52KR6;B8JJ92;B8JJ91;F6 | Acin1 protein;Apoptotic chromatin condens        | Acin1             |
| NaN      | NaN      | NaN      | Q5F258;Q68FF6                      | Q5F258;Q68FF6           | ARF GTPase-activating protein GIT1               | Git1              |
| NaN      | NaN      | 23.29614 | Q5SQX6;F6QD74;G3UZ15               | Q5SQX6;F6QD74           | Cytoplasmic FMR1-interacting protein 2;Cyt       | Cyfpip2           |
| 23.48001 | 23.64306 | 22.97946 | Q60876                             | Q60876                  | Eukaryotic translation initiation factor 4E-bi   | Eif4ebp1          |
| NaN      | NaN      | NaN      | Q61165                             | Q61165                  | Sodium/hydrogen exchanger 1                      | Slc9a1            |
| 23.97596 | 23.82881 | 23.93157 | Q61390;B1AT05                      | Q61390;B1AT05           | T-complex protein 1 subunit zeta-2               | Ctcb6             |
| 21.75124 | 21.0625  | 19.39833 | Q61609                             | Q61609                  | Sodium-dependent phosphate transporter 1         | Slc20a1           |
| NaN      | NaN      | NaN      | Q61823                             | Q61823                  | Programmed cell death protein 4                  | Pdcd4             |
| 22.79947 | 22.69922 | NaN      | Q62241                             | Q62241                  | U1 small nuclear ribonucleoprotein C             | Snrpc             |
| NaN      | NaN      | NaN      | Q62312                             | Q62312                  | TGF-beta receptor type-2                         | Tgfb2             |
| 23.79947 | 24.65403 | 24.37119 | Q63918                             | Q63918                  | Caveolae-associated protein 2                    | Cavin2            |
| NaN      | 22.59377 | NaN      | Q6NVE8                             | Q6NVE8                  | WD repeat-containing protein 44                  | Wdr44             |
| 23.65403 | NaN      | 24.391   | Q6PAV2                             | Q6PAV2                  | Probable E3 ubiquitin-protein ligase HERC4       | Herc4             |
| NaN      | NaN      | NaN      | Q6PFD6                             | Q6PFD6                  | Kinesin-like protein KIF18B                      | Kif18b            |
| 22.46513 | 22.62979 | 22.81714 | Q6PIP5                             | Q6PIP5                  | NudC domain-containing protein 1                 | Nudcd1            |
| NaN      | NaN      | 24.32389 | Q6QI06                             | Q6QI06                  | Rapamycin-insensitive companion of mTOR          | Rictor            |
| 25.42982 | 25.317   | 25.30313 | Q78XF5                             | Q78XF5                  | Oligosaccharyltransferase complex subunit        | Ostc              |
| 26.60399 | 26.86231 | 26.75175 | Q78YZ6                             | Q78YZ6                  | Short coiled-coil protein                        | Scoc              |
| 23.51653 | 23.391   | 23.54038 | Q7TMM9                             | Q7TMM9                  | Tubulin beta-2A chain                            | Tub2a             |
| 23.22435 | 23.63201 | 23.74919 | Q7TSV4                             | Q7TSV4                  | Phosphoglucomutase-2                             | Pgm2              |
| NaN      | NaN      | NaN      | Q80U93                             | Q80U93                  | Nuclear pore complex protein Nup214              | Nup214            |
| 23.239   | 22.90976 | NaN      | Q80UW5                             | Q80UW5                  | Serine/threonine-protein kinase MRCK gam         | Cdc42bpg          |
| 23.03086 | 22.73686 | 23.02749 | Q80WS3                             | Q80WS3                  | rRNA/tRNA 2-O-methyltransferase fibrillar        | Fbl1              |
| 25.61246 | NaN      | 24.51051 | Q80YQ1                             | Q80YQ1                  | Thrombospondin-1                                 | Tbs1              |
| 25.39754 | 25.33074 | 25.80193 | Q810Q5                             | Q810Q5                  | Normal mucosa of esophagus-specific gene         | Nmes1             |
| 25.32389 | 25.34435 | 25.37451 | Q88GB7                             | Q88GB7                  | Enolase-phosphatase E1                           | Enoph1            |
| NaN      | NaN      | NaN      | Q8BGS0                             | Q8BGS0                  | Protein MAK16 homolog                            | Mak16             |
| 24.48616 | 23.96719 | 23.55215 | Q8BGX0                             | Q8BGX0                  | E3 ubiquitin-protein ligase TRIM23               | Trim23            |
| 24.14102 | 24.24627 | 24.08537 | Q8BH40;O70439                      | Q8BH40;O70439           | Syntaxin-7                                       | Stx7              |
| NaN      | NaN      | NaN      | Q8BHX6;J3QK52;Q9WV70               | Q8BHX6;J3QK52;Q9WV70    | Nucleolar complex protein 2 homolog              | Noc2l             |
| 21.25926 | NaN      | NaN      | Q8BK80;Q9DBN5                      | Q8BK80;Q9DBN5           | Lon protease homolog 2, peroxisomal              | Lonp2             |
| 22.63423 | 22.44506 | 22.88204 | Q8BML1                             | Q8BML1                  | MICAL2                                           | Mical2            |
| 22.82493 | 22.31008 | 22.23608 | Q8BNU0                             | Q8BNU0                  | Armadillo repeat-containing protein 6            | Armc6             |
| 22.53326 | 21.52612 | NaN      | Q8BTY8                             | Q8BTY8                  | Sec1 family domain-containing protein 2          | Scf2              |
| NaN      | 22.88948 | NaN      | Q8BUE4                             | Q8BUE4                  | Apoptosis-inducing factor 2                      | Aifm2             |
| NaN      | NaN      | NaN      | Q8BZ20                             | Q8BZ20                  | Poly [ADP-ribose] polymerase 12                  | Parp12            |
| 21.99852 | 20.93157 | 22.21549 | Q8C079;Q8C9H6                      | Q8C079;Q8C9H6           | Striatin-interacting protein 1;Striatin-interac  | Strip1;Strip2     |
| NaN      | NaN      | 21.34841 | Q8COD5                             | Q8COD5                  | Elongation factor-like GTPase 1                  | Efl1              |
| NaN      | NaN      | NaN      | Q8C1Y8                             | Q8C1Y8                  | Vacuolar fusion protein CC21 homolog             | Ccz1              |
| NaN      | NaN      | NaN      | Q8C561                             | Q8C561                  | LMBR1 domain-containing protein 2                | Lmbrd2            |
| 25.68646 | 25.63478 | 25.79452 | Q8C5R8                             | Q8C5R8                  | Phosphoribosyl pyrophosphate synthetase          | Prps11            |
| 24.60964 | 24.1488  | 24.27498 | Q8C7E4                             | Q8C7E4                  | Ribonuclease 4                                   | Rnase4            |
| 23.72858 | 23.83846 | 22.30452 | Q8CF66                             | Q8CF66                  | Regulator complex protein LAMTOR4                | Lamtor4           |
| 23.68646 | 23.68646 | 23.88577 | Q8CFV9                             | Q8CFV9                  | Riboflavin kinase                                | Rfk               |
| NaN      | NaN      | NaN      | Q8CFZ0;G3UYP0;P63280               | Q8CFZ0;G3UYP0;P63280    | SUMO-conjugating enzyme UBC9;SUMO-con            | Ube2i             |
| NaN      | NaN      | NaN      | Q8CGA0                             | Q8CGA0                  | Protein phosphatase 1F                           | Ppm1f             |
| NaN      | NaN      | NaN      | Q8CHT0                             | Q8CHT0                  | Delta-1-pyrroline-5-carboxylate dehydrogen       | Aldh4a1           |
| 24.42342 | 24.28207 | 24.36453 | Q8K0B2                             | Q8K0B2                  | Probable lysosomal cobalamin transporter         | Lmbrd1            |
| NaN      | 23.03423 | NaN      | Q8K0C1                             | Q8K0C1                  | Importin-13                                      | Ipo13             |
| NaN      | 23.05258 | NaN      | Q8K0P3                             | Q8K0P3                  | TLD domain-containing protein 1                  | Tldc1             |
| 22.6006  | 23.16576 | 22.79749 | Q8K1S3                             | Q8K1S3                  | Netrin receptor UNC5B                            | Unc5b             |

|          |          |          |                                  |                      |                                               |                |
|----------|----------|----------|----------------------------------|----------------------|-----------------------------------------------|----------------|
| NaN      | NaN      | 25.18707 | Q8K2I9                           | Q8K2I9               | F-box DNA helicase 1                          | Fbxo18         |
| 28.60045 | 28.41135 | 28.36202 | Q8R015                           | Q8R015               | Biogenesis of lysosome-related organelles co  | Bloc1s5        |
| NaN      | 20.48738 | 20.2764  | Q8R1L4                           | Q8R1L4               | ER lumen protein-retaining receptor 3         | Kdelr3         |
| 23.86703 | 23.88577 | 24.10949 | Q8R1T1                           | Q8R1T1               | Charged multivesicular body protein 7         | Chmp7          |
| 23.54038 | 22.80341 | 23.36453 | Q8R527                           | Q8R527               | Rho-related GTP-binding protein RhoQ          | Rhoq           |
| NaN      | 21.85377 | 22.00881 | Q8VBZ0                           | Q8VBZ0               | Dehydrogenase/reductase SDR family mem        | Dhrsx          |
| 23.391   | NaN      | NaN      | Q8VEJ9;Q8BPY9                    | Q8VEJ9;Q8BPY9        | Vacuolar protein sorting-associated protein   | Vps4a;Fignl1   |
| 22.31838 | 21.78357 | 21.38047 | Q8VHK9                           | Q8VHK9               | ATP-dependent RNA helicase DHX36              | Dhx36          |
| NaN      | NaN      | NaN      | Q8VI93                           | Q8VI93               | 2-5-oligoadenylate synthase 3                 | Oas3           |
| NaN      | NaN      | 21.7348  | Q91VB8;P01942                    | Q91VB8;P01942        | Alpha globin 1;Hemoglobin subunit alpha       | Hba-a1;Hba     |
| 22.7348  | 22.69922 | 22.5545  | Q91VE0                           | Q91VE0               | Long-chain fatty acid transport protein 4     | Slc27a4        |
| 23.46762 | NaN      | NaN      | Q91VJ4                           | Q91VJ4               | Serine/threonine-protein kinase 38            | Stk38          |
| 23.2006  | 23.1946  | 23.33756 | Q91X96                           | Q91X96               | Guanine nucleotide exchange factor MSS4       | Rabif          |
| 21.53089 | 21.18253 | 21.27071 | Q920I9                           | Q920I9               | WD repeat-containing protein 7                | Wdr7           |
| 26.95394 | 26.82639 | 26.35448 | Q922R8                           | Q922R8               | Protein disulfide-isomerase A6                | Pdia6          |
| NaN      | NaN      | NaN      | Q923D4                           | Q923D4               | Splicing factor 3B subunit 5                  | Sf3b5          |
| NaN      | 22.68432 | NaN      | Q923F1                           | Q923F1               | Chloride channel, nucleotide-sensitive, 1A    | Clns1a         |
| NaN      | NaN      | 22.94949 | Q924T2                           | Q924T2               | 28S ribosomal protein S2, mitochondrial       | Mrps2          |
| 22.73892 | 22.85377 | 22.94414 | Q99J27                           | Q99J27               | Acetyl-coenzyme A transporter 1               | Slc33a1        |
| 23.54038 | 23.55215 | 23.57542 | Q99J83                           | Q99J83               | Autophagy protein 5                           | Atg5           |
| NaN      | NaN      | NaN      | Q99J93;A0A1B0GT68                | Q99J93;A0A1B0GT68    | Interferon-induced transmembrane protein      | Ifitm2;Gm4571; |
| 23.13946 | 22.67142 | 21.77555 | Q99K23                           | Q99K23               | Ufm1-specific protease 2                      | Ufsp2          |
| NaN      | NaN      | NaN      | Q99KI3                           | Q99KI3               | ER membrane protein complex subunit 3         | Emc3           |
| NaN      | NaN      | NaN      | Q99M28                           | Q99M28               | RNA-binding protein with serine-rich domain   | Rnps1          |
| 23.391   | 23.50446 | 22.62756 | Q99P72;Q8BHF5                    | Q99P72;Q8BHF5        | Reticulon-4;Reticulon                         | Rtn4           |
| 23.77957 | 23.90426 | 23.77957 | Q9CPN9                           | Q9CPN9               | RIKEN cDNA 2210010C04 gene                    | 2210010C04Rik  |
| 24.49228 | 24.59263 | 24.44253 | Q9CPP6                           | Q9CPP6               | NADH dehydrogenase [ubiquinone] 1 alpha       | Ndufa5         |
| NaN      | NaN      | 22.67573 | Q9CPR5                           | Q9CPR5               | 39S ribosomal protein L15, mitochondrial      | Mrpl15         |
| 22.92976 | 22.41957 | 22.42214 | Q9CPS7                           | Q9CPS7               | RNA-binding protein PNO1                      | Pno1           |
| NaN      | NaN      | NaN      | Q9CPZ6                           | Q9CPZ6               | ORM1-like protein 3                           | Ormdl3         |
| 23.32389 | NaN      | 22.47754 | Q9CQ28                           | Q9CQ28               | Diphthine--ammonia ligase                     | Dph6           |
| 23.80931 | 23.66492 | 23.62087 | Q9CQ54                           | Q9CQ54               | NADH dehydrogenase [ubiquinone] 1 subun       | Ndufc2         |
| 23.46762 | 23.33756 | 23.94056 | Q9CQ55                           | Q9CQ55               | Serine/threonine-protein kinase RIO2          | Riok2          |
| 23.88577 | NaN      | 23.58692 | Q9CQV4                           | Q9CQV4               | Reticulophagy regulator 3                     | Retreg3        |
| 22.29894 | 23.2535  | 22.55684 | Q9CR09                           | Q9CR09               | Ubiquitin-fold modifier-conjugating enzyme    | Ufc1           |
| NaN      | NaN      | NaN      | Q9CRB2                           | Q9CRB2               | H/ACA ribonucleoprotein complex subunit 2     | Nhp2           |
| NaN      | NaN      | NaN      | Q9CT10                           | Q9CT10               | Ran-binding protein 3                         | Ranbp3         |
| NaN      | 23.57542 | 23.32389 | Q9CY52                           | Q9CY52               | Probable tRNA(His) guanylyltransferase        | Thg1l          |
| NaN      | NaN      | NaN      | Q9CZG3                           | Q9CZG3               | COMM domain-containing protein 8              | Commdd8        |
| 21.58692 | NaN      | NaN      | Q9D1H6                           | Q9D1H6               | NADH dehydrogenase [ubiquinone] 1 alpha       | Ndufaf4        |
| 24.32389 | 24.44253 | 24.47383 | Q9D1Q4                           | Q9D1Q4               | Dolichol-phosphate mannosyltransferase su     | Dpm3           |
| 23.03423 | 23.73892 | 22.96543 | Q9D7X8                           | Q9D7X8               | Gamma-glutamylcyclotransferase                | Ggct           |
| 25.1946  | 25.51653 | 25.42662 | Q9D958                           | Q9D958               | Signal peptidase complex subunit 1            | Spcc1          |
| 23.94056 | 23.70767 | 23.6971  | Q9DAK9                           | Q9DAK9               | 14 kDa phosphohistidine phosphatase           | Phpt1          |
| NaN      | NaN      | NaN      | Q9DAW9                           | Q9DAW9               | Calponin-3                                    | Cnn3           |
| 21.9566  | 20.91707 | NaN      | Q9DB82;P61600                    | Q9DB82;P61600        | N-acetyltransferase 5 (ARD1 homolog, S. cer   | Naa20          |
| 23.26785 | NaN      | 23.36453 | Q9DBG9                           | Q9DBG9               | Tax1-binding protein 3                        | Tax1bp3        |
| NaN      | NaN      | NaN      | Q9DCE9                           | Q9DCE9               | Interferon gamma-induced GTPase               | Igtp           |
| 25.42662 | 25.1757  | 25.04843 | Q9DCF9                           | Q9DCF9               | Translocon-associated protein subunit gam     | Ssr3           |
| NaN      | NaN      | 22.27071 | Q9EPK6                           | Q9EPK6               | Nucleotide exchange factor SIL1               | Sil1           |
| NaN      | NaN      | NaN      | Q9EQC7                           | Q9EQC7               | Follistatin-related protein 3                 | Fstl3          |
| 23.01733 | 22.64966 | NaN      | Q9EQG9                           | Q9EQG9               | Collagen type IV alpha-3-binding protein      | Col4a3bp       |
| 24.33756 | 24.317   | 21.91707 | Q9EQQ2                           | Q9EQQ2               | Protein YIPF5                                 | Yipf5          |
| NaN      | NaN      | NaN      | Q9ER71                           | Q9ER71               | Rho-related GTP-binding protein RhoJ          | Rhoj           |
| 23.64306 | 23.94056 | 24.35783 | Q9ERD7;A0A1D5RM76                | Q9ERD7               | Tubulin beta-3 chain                          | Tubb3          |
| 22.73892 | 23.59833 | NaN      | Q9ERY9                           | Q9ERY9               | Probable ergosterol biosynthetic protein 28   | Erg28          |
| 22.72234 | 22.38311 | 22.92615 | Q9JIK9                           | Q9JIK9               | 28S ribosomal protein S34, mitochondrial      | Mrps34         |
| NaN      | NaN      | NaN      | Q9JK53                           | Q9JK53               | Prolargin                                     | Prelp          |
| 24.05258 | 24.06907 | 24.54628 | Q9JKV5                           | Q9JKV5               | Secretory carrier-associated membrane prot    | Scamp4         |
| 24.89966 | 24.44884 | 24.06085 | Q9JLJ5                           | Q9JLJ5               | Elongation of very long chain fatty acids pro | Elov1          |
| 24.417   | 24.55215 | 25.08942 | Q9JLZ6                           | Q9JLZ6               | Hypermethylated in cancer 2 protein           | Hic2           |
| 24.27498 | NaN      | 23.11744 | Q9QUR7                           | Q9QUR7               | Peptidyl-prolyl cis-trans isomerase NIMA-int  | Pin1           |
| NaN      | 24.31008 | NaN      | Q9QYS9                           | Q9QYS9               | Protein quaking                               | Qki            |
| NaN      | 21.2006  | NaN      | Q9R1T2                           | Q9R1T2               | SUMO-activating enzyme subunit 1              | Sae1           |
| 22.07561 | 22.29334 | 22.73892 | Q9WU60                           | Q9WU60               | Attractin                                     | Atrn           |
| 23.24916 | NaN      | NaN      | Q9WVK0                           | Q9WVK0               | Type-1 angiotensin II receptor-associated pr  | Agtrap         |
| NaN      | NaN      | NaN      | Q9Z1R9                           | Q9Z1R9               | MCG124046                                     | Prss1          |
| NaN      | NaN      | NaN      | Q9Z277                           | Q9Z277               | Tyrosine-protein kinase BAZ1B                 | Baz1b          |
| NaN      | NaN      | NaN      | Q9Z2H7                           | Q9Z2H7               | PDZ domain-containing protein GIPC2           | Gipc2          |
| NaN      | 24.59833 | 24.61526 | S4R1E5;F7A8H6;O70325             | S4R1E5;F7A8H6;O70325 | Glutathione peroxidase;Phospholipid hydro     | Gpx4           |
| 25.09748 | 24.80931 | 24.89966 | S4R1K7;S4R1P7;G3UWG7;S4R287;Q9CF | S4R1K7;S4R1P7;G3UWG7 | WASH complex subunit 3;WASH complex su        | Washc3         |
| NaN      | NaN      | NaN      | S4R1M2;D3YXK2                    | S4R1M2;D3YXK2        | Scaffold attachment factor B1                 | Safb           |
| 24.18707 | 23.82881 | NaN      | V9GX10;V9GXT7;Q9Z266             | V9GX10;V9GXT7;Q9Z266 | SNARE-associated protein Snapin               | Snapin         |
| NaN      | NaN      | NaN      | Z4YJT3;Q6ZQ58                    | Z4YJT3;Q6ZQ58        | La-related protein 1                          | Larp1          |

Supplemental table 2: Student's T-test between EMT/6 Control and EMT/6 RT

| LQF Intensity<br>EMT/6 Control | LQF Intensity<br>EMT/6 Control | LQF Intensity<br>EMT/6 Control3 | LQF Intensity<br>EMT/6 RT1 | LQF Intensity<br>EMT/6 RT2 | LQF Intensity<br>EMT/6 RT3 | -Log t-test p value<br>EMT/6 Control vs | t-test Difference<br>EMT/6 Control vs | Cluster                 | Protein IDs     | Majority<br>protein IDs |
|--------------------------------|--------------------------------|---------------------------------|----------------------------|----------------------------|----------------------------|-----------------------------------------|---------------------------------------|-------------------------|-----------------|-------------------------|
| 25.42342                       | 26.26964                       | 25.82396                        | 21.91707                   | 19.74878                   | 21.98815                   | 2.4002024177                            | -4.62100474                           | Higher in EMT/6 Control | P97298;B7ZC25;F | P97298                  |
| 23.92252                       | 24.23169                       | 23.81909                        | 21.18253                   | 21.66275                   | 21.65403                   | 3.61071201                              | -2.4913311                            | Higher in EMT/6 Control | Q52KR3;AOA286Y  | Q52KR3                  |
| 26.18707                       | 27.77077                       | 27.4073                         | 25.33756                   | 25.18329                   | 25.81176                   | 3.242294781                             | -2.154510498                          | Higher in EMT/6 Control | Q99KN1;A2AIS9;F | Q99KN1;A2AIS9;F         |
| 27.77077                       | 28.15074                       | 26.19272                        | 25.16039                   | 25.53742                   | 25.16806                   | 1.564964956                             | -2.082789103                          | Higher in EMT/6 Control | E9QC62;Q8CG14;F | E9QC62;Q8CG14;F         |
| 25.9955                        | 26.07928                       | 26.2021                         | 24.30314                   | 24.30313                   | 25.31563                   | 2.042161306                             | -2.042161306                          | Higher in EMT/6 Control | E9Q7U2;Q8CGU1;F | E9Q7U2;Q8CGU1;F         |
| 27.54628                       | 27.80193                       | 27.68646                        | 25.4008                    | 25.65753                   | 25.84086                   | 3.792397013                             | -2.03909111                           | Higher in EMT/6 Control | P97499          | P97499                  |
| 28.58262                       | 28.52776                       | 28.27142                        | 26.60399                   | 26.65949                   | 26.42982                   | 2.053260897                             | -1.896165212                          | Higher in EMT/6 Control | O09164          | O09164                  |
| 28.37036                       | NaN                            | 28.29351                        | 26.44884                   | 26.57542                   | NaN                        | 2.1782184501                            | -1.819802284                          | Higher in EMT/6 Control | Q6P57F          | Q6P57F                  |
| 28.48616                       | 26.71293                       | 25.98902                        | 25.27853                   | 25.14492                   | 25.32732                   | 1.4598295                               | -1.812449137                          | Higher in EMT/6 Control | S4R1E5;F7A8H6;O | S4R1E5;F7A8H6;O         |
| 24.10149                       | 22.53801                       | 24.08537                        | 21.7348                    | 21.53564                   | 22.09184                   | 1.519521145                             | -1.787533442                          | Higher in EMT/6 Control | Q3UZ39;AOA087V  | Q3UZ39                  |
| 26.52253                       | 27.11148                       | 27.58262                        | 25.86938                   | 24.28912                   | 25.70767                   | 1.412212853                             | -1.783484141                          | Higher in EMT/6 Control | Q9C764;A2AS88;F | Q9C764                  |
| 27.509                         | 27.53148                       | 27.63201                        | 25.7543                    | 25.37782                   | 26.2021                    | 2.744684966                             | -1.779421488                          | Higher in EMT/6 Control | Q9D8T2          | Q9D8T2                  |
| 29.84146                       | 29.56638                       | 30.08639                        | 28.23991                   | 27.63893                   | 28.54995                   | 2.274859318                             | -1.688479106                          | Higher in EMT/6 Control | EQ98Q0;P06909;D | EQ98Q0;P06909;D         |
| 24.92705                       | 25.72338                       | 24.2535                         | 23.24045                   | 23.2169                    | 23.54038                   | 1.69373538                              | -1.63046964                           | Higher in EMT/6 Control | Q8VH85;F6XXUO   | Q8VH85;F6XXUO           |
| 27.07112                       | 26.93157                       | 27.52402                        | 25.44569                   | 25.52115                   | 25.81176                   | 2.774803021                             | -1.572367986                          | Higher in EMT/6 Control | Q35188;AOA1D5R  | Q35188                  |
| 28.92309                       | 29.03486                       | 28.76446                        | 27.391                     | 27.39917                   | 27.33245                   | 3.353893692                             | -1.533260981                          | Higher in EMT/6 Control | Q8R366;G3UY21;A | Q8R366;G3UY21;A         |
| 28.39917                       | 28.23535                       | 28.67976                        | 27.20769                   | 27.1795                    | 26.34435                   | 2.095712076                             | -1.527581533                          | Higher in EMT/6 Control | Q9CR81;O54974;F | Q9CR81;O54974;F         |
| 24.20955                       | 23.32389                       | 24.48001                        | 23.417                     | 21.94235                   | 22.09184                   | 1.522555956                             | -1.520752589                          | Higher in EMT/6 Control | F6ULQ4;Q3U141;F | F6ULQ4;Q3U141;F         |
| 27.53148                       | 28.13124                       | 28.60752                        | 26.85043                   | 25.99881                   | 26.92025                   | 1.600893218                             | -1.499917348                          | Higher in EMT/6 Control | Q3UHK6;B7ZNJ5;C | Q3UHK6                  |
| 26.17188                       | 25.97815                       | 26.4073                         | 24.82396                   | 24.92252                   | 24.33756                   | 2.611936497                             | -1.491096497                          | Higher in EMT/6 Control | P52927;Q6NSP9   | P52927;Q6NSP9           |
| 23.92252                       | 24.45513                       | 23.80931                        | 23.12692                   | 22.68003                   | 21.98468                   | 1.712096156                             | -1.465113322                          | Higher in EMT/6 Control | P32261;AOA0A6YX | P32261;AOA0A6YX         |
| 28.87994                       | 28.89735                       | 29.14831                        | 27.42342                   | 27.58978                   | 27.67976                   | 3.60509863                              | -1.410879135                          | Higher in EMT/6 Control | P43277;7HFT9J;O | P43277                  |
| 26.16615                       | 25.24264                       | 25.27142                        | 24.59833                   | 23.50446                   | 24.48616                   | 1.380340378                             | -1.363753637                          | Higher in EMT/6 Control | Q5SURO;F6RUL9   | Q5SURO                  |
| 31.19013                       | 31.11768                       | 31.08639                        | 29.25292                   | 29.31743                   | 30.07368                   | 2.36295719                              | -1.35905838                           | Higher in EMT/6 Control | Q99K41          | Q99K41                  |
| 27.78332                       | 27.74535                       | 27.93157                        | 26.21141                   | 26.64581                   | 26.60399                   | 3.05741097                              | -1.333005269                          | Higher in EMT/6 Control | P43275          | P43275                  |
| 25.16039                       | 24.58118                       | 25.31008                        | 23.83846                   | 23.58692                   | 23.65403                   | 2.313794333                             | -1.324079514                          | Higher in EMT/6 Control | F8WH10;E9Q4N8;  | F8WH10;E9Q4N8;          |
| 28.09144                       | 28.9428                        | 28.01372                        | 26.89735                   | 26.82639                   | 27.41538                   | 1.686827046                             | -1.302944183                          | Higher in EMT/6 Control | Q8VD65          | Q8VD65                  |
| 24.8044                        | 24.6971                        | 24.91798                        | 23.87643                   | 23.50446                   | 23.1946                    | 2.459421755                             | -1.28133138                           | Higher in EMT/6 Control | Q7TNC4;E9Q715;C | Q7TNC4;E9Q715;C         |
| 24.96279                       | 25.76951                       | 25.63201                        | 23.93157                   | 23.99335                   | 24.72338                   | 1.595737041                             | -1.238670349                          | Higher in EMT/6 Control | Q9EP52          | Q9EP52                  |
| 25.32732                       | 25.66492                       | 25.2535                         | 24.47383                   | 23.82881                   | 24.32389                   | 2.18322177                              | -1.206403732                          | Higher in EMT/6 Control | P19788          | P19788                  |
| 28.68646                       | 28.69975                       | 28.90865                        | 27.67303                   | 27.48616                   | 27.5969                    | 3.705421735                             | -1.179653168                          | Higher in EMT/6 Control | P10922          | P10922                  |
| 26.03591                       | 25.96058                       | 25.7543                         | 24.42342                   | 24.74919                   | 25.04427                   | 2.39682586                              | -1.177967072                          | Higher in EMT/6 Control | Q8K482          | Q8K482                  |
| 27.27142                       | 27.73892                       | 27.46295                        | 26.54628                   | 26.13907                   | 26.26249                   | 2.352766587                             | -1.175153097                          | Higher in EMT/6 Control | Q8Q2Y6          | Q8Q2Y6                  |
| 29.30226                       | 29.56092                       | 29.30878                        | 28.23991                   | 28.16039                   | 28.24898                   | 3.706662442                             | -1.174227397                          | Higher in EMT/6 Control | Q04857          | Q04857                  |
| 26.11347                       | 25.68378                       | 26.44253                        | 24.66944                   | 25.11653                   | 24.64306                   | 1.449055604                             | -1.170180639                          | Higher in EMT/6 Control | P17095          | P17095                  |
| 25.18329                       | 25.26785                       | 25.57542                        | 24.34435                   | 23.99335                   | 24.239                     | 2.7212314                               | -1.149957657                          | Higher in EMT/6 Control | P50228          | P50228                  |
| 28.27142                       | 28.29351                       | 28.07623                        | 26.7706                    | 27.07112                   | 27.391                     | 2.400376697                             | -1.133993149                          | Higher in EMT/6 Control | P97857          | P97857                  |
| 27.0296                        | 27.2803                        | 27.20769                        | 26.69975                   | 25.62366                   | 25.79699                   | 1.529161193                             | -1.132394155                          | Higher in EMT/6 Control | Q81V88          | Q81V88                  |
| 31.08005                       | 31.07368                       | 31.16639                        | 29.88577                   | 30.03486                   | 30.00838                   | 4.486372237                             | -1.130366643                          | Higher in EMT/6 Control | P43274          | P43274                  |
| 29.70306                       | 29.85638                       | 29.58631                        | 28.52402                   | 28.68311                   | 28.60752                   | 3.591866442                             | -1.110326767                          | Higher in EMT/6 Control | B1AWEO;Q6PFA2;J | B1AWEO;Q6PFA2;J         |
| 29.31095                       | 29.42342                       | 29.26696                        | 28.12139                   | 28.32817                   | 28.2803                    | 3.819759531                             | -1.090488434                          | Higher in EMT/6 Control | O54962          | O54962                  |
| 28.99496                       | 28.61807                       | 28.98956                        | 27.54628                   | 28.00838                   | 27.77076                   | 2.402849383                             | -1.090290705                          | Higher in EMT/6 Control | P05063          | P05063                  |
| 30.86083                       | 30.55728                       | 30.59335                        | 29.72923                   | 29.23078                   | 29.78176                   | 2.259212867                             | -1.08989652                           | Higher in EMT/6 Control | Q62000          | Q62000                  |
| 24.98468                       | 25.13712                       | 25.06624                        | 23.94949                   | 23.86703                   | 24.06907                   | 3.857845617                             | -1.080816905                          | Higher in EMT/6 Control | G3X914;Q91JW6;O | G3X914;Q91JW6;O         |
| 27.81421                       | 27.76446                       | 27.63893                        | 26.50749                   | 26.60399                   | 26.89735                   | 2.946277206                             | -1.069587708                          | Higher in EMT/6 Control | P28301          | P28301                  |
| 30.51089                       | 30.71293                       | 30.59335                        | 29.58441                   | 29.54995                   | 29.49572                   | 4.11045004                              | -1.062358856                          | Higher in EMT/6 Control | P43276          | P43276                  |
| 32.34625                       | 32.35941                       | 32.38278                        | 31.25912                   | 31.31419                   | 31.33265                   | 5.720961495                             | -1.059825897                          | Higher in EMT/6 Control | P15864          | P15864                  |
| 26.64581                       | 27.05051                       | 26.87408                        | 25.75175                   | 25.73376                   | 25.92025                   | 2.884662709                             | -1.05488205                           | Higher in EMT/6 Control | AOA087WNN1;Q9   | AOA087WNN1;Q9           |
| 27.26249                       | 27.20769                       | 27.2803                         | 26.05879                   | 26.18707                   | 26.40568                   | 3.24544909                              | -1.032979329                          | Higher in EMT/6 Control | Q00915          | Q00915                  |
| 35.16414                       | 35.14148                       | 35.08718                        | 34.05924                   | 34.09899                   | 34.15285                   | 5.073150266                             | -1.027236938                          | Higher in EMT/6 Control | AOA0N45V66;Q8R  | AOA0N45V66;Q8R          |
| 33.20624                       | 33.19601                       | 33.26192                        | 32.2106                    | 32.2106                    | 32.21639                   | 5.985302437                             | -1.008861542                          | Higher in EMT/6 Control | Q9EQK5          | Q9EQK5                  |
| 30.23078                       | 30.33031                       | 30.2535                         | 29.34492                   | 29.12139                   | 29.32603                   | 6.171393042                             | -1.005913417                          | Higher in EMT/6 Control | Q64523;Q6G557;C | Q64523;Q6G557;C         |
| 25.99335                       | 25.15653                       | 26.29789                        | 25.11347                   | 24.60399                   | 24.7543                    | 1.247973723                             | -0.992003759                          | Higher in EMT/6 Control | O35295          | O35295                  |
| 25.08132                       | 25.1055                        | 24.27498                        | 23.6971                    | 23.64306                   | 24.26785                   | 1.316871906                             | -0.951256434                          | Higher in EMT/6 Control | F7BPW6;E9QAT4;F | F7BPW6;E9QAT4;F         |
| 25.27498                       | 25.8044                        | 25.89735                        | 24.72858                   | 24.73892                   | 24.66492                   | 2.080191016                             | -0.948099136                          | Higher in EMT/6 Control | P84089;AOA1W2P  | P84089;AOA1W2P          |
| 25.77957                       | 26.06702                       | 25.7024                         | 25.1946                    | 24.89966                   | 24.66492                   | 2.099407882                             | -0.929932912                          | Higher in EMT/6 Control | Q8R105          | Q8R105                  |
| 24.19014                       | 34.36694                       | 34.36333                        | 33.38278                   | 33.31689                   | 33.44579                   | 3.73322404                              | -0.925949097                          | Higher in EMT/6 Control | P68433          | P68433                  |
| 29.42542                       | 29.56456                       | 29.40324                        | 28.70636                   | 28.45905                   | 28.45905                   | 3.172522682                             | -0.922928492                          | Higher in EMT/6 Control | Q3THW5;P0C056;E | Q3THW5;P0C056;E         |
| 27.91456                       | 27.22619                       | 27.44727                        | 26.20955                   | 27.06805                   | 26.60399                   | 1.327708798                             | -0.904539744                          | Higher in EMT/6 Control | P28653          | P28653                  |
| 33.63071                       | 33.72517                       | 33.68935                        | 32.79653                   | 32.7692                    | 32.76525                   | 5.16464467                              | -0.902950287                          | Higher in EMT/6 Control | Q8C4U8;O35474;C | Q8C4U8;O35474;C         |
| 25.48922                       | 25.89926                       | 25.8044                         | 24.66492                   | 25.07316                   | 24.74919                   | 1.592281754                             | -0.902001063                          | Higher in EMT/6 Control | Q9EFL2          | Q9EFL2                  |
| 23.99335                       | 24.23169                       | 24.14102                        | 22.88017                   | 23.4006                    | 23.37782                   | 2.093782255                             | -0.901336034                          | Higher in EMT/6 Control | Q8R017          | Q8R017                  |
| 25.27853                       | 25.36786                       | 24.77455                        | 24.36543                   | 24.48616                   | 24.86703                   | 1.56669818                              | -0.901074092                          | Higher in EMT/6 Control | F8WJG3;P62996   | F8WJG3;P62996           |
| 26.72598                       | 26.80193                       | 26.47537                        | 25.69975                   | 25.92391                   | 25.69179                   | 2.685347678                             | -0.894145966                          | Higher in EMT/6 Control | Q9ESM6          | Q9ESM6                  |
| 26.47833                       | 26.69975                       | 26.15653                        | 25.79452                   | 25.34096                   | 25.51953                   | 1.911601251                             | -0.891702016                          | Higher in EMT/6 Control | Q6W5C0          | Q6W5C0                  |
| 27.06085                       | 27.24202                       | 27.0296                         | 26.5252                    | 26.26607                   | 26.15074                   | 1.991842784                             | -0.890717824                          | Higher in EMT/6 Control | Q8BH43;B1AUN0   | Q8BH43;B1AUN0           |
| 27.07112                       | 26.68646                       | 26.67303                        | 26.02749                   | 26.17188                   | 25.57542                   | 1.787525308                             | -0.885270437                          | Higher in EMT/6 Control | Q99K66          | Q99K66                  |
| 28.94                          | 28.37451                       | 29.0296                         | 28.03486                   | 27.51653                   | 28.14102                   | 1.475578247                             | -0.883899689                          | Higher in EMT/6 Control | F8WH23;E9Q5D9;J | F8WH23;E9Q5D9;J         |
| 23.12376                       | 23.86703                       | 23.35111                        | 22.60964                   | 22.52373                   | NaN                        | 1.267398606                             | -0.880155552                          | Higher in EMT/6 Control | Q8BR63          | Q8BR63                  |
| 28.37451                       | 24.72338                       | 24.88577                        | 23.95837                   | 23.84805                   | 24.00196                   | 2.705167861                             | -0.868449847                          | Higher in EMT/6 Control | O89023          | O89023                  |
| 26.50749                       | 28.26249                       | 28.391                          | 27.29789                   | 27.55362                   | 27.57542                   | 3.048250192                             | -0.867020289                          | Higher in EMT/6 Control | P30681;AOA1B0G  | P30681;AOA1B0G          |
| 28.13614                       | 26.27142                       | 26.75175                        | 25.28912                   | 25.74407                   | 25.92252                   | 1.668635367                             | -0.858314514                          | Higher in EMT/6 Control | Q9CXW3;AOA0A6   | Q9CXW3                  |
| 28.82941                       | 25.43301                       | 25.34773                        | 24.64856                   | 24.391                     | 24.56964                   | 3.427091212                             | -0.853969256                          | Higher in EMT/6 Control | AOA1B0GR8;Q62   | AOA1B0GR8;Q62           |
| 26.20955                       | 26.26609                       | 26.64581                        | 25.77957                   | 25.04843                   | 25.06993                   | 2.42515804                              | -0.850516001                          | Higher in EMT/6 Control | O35598;EP9YF2   | O35598;EP9YF2           |
| 24.27498                       | 24.40406                       | 24.92705                        | 23.6971                    | 23.77957                   | 23.64306                   | 1.895857352                             | -0.84582456                           | Higher in EMT/6 Control | Q9WVJ3          | Q9WVJ3                  |
| 35.09899                       | 35.02663                       | 35.17905                        | 34.22647                   | 34.21928                   | 34.38278                   | 3.549162828                             | -0.82537969                           | Higher in EMT/6 Control | A2AUK7;A2AUK8;J | A2AUK7;A2AUK8;J         |
| 26.75175                       | 26.64581                       | 25.94726                        | 25.64581                   | 25.39754                   | 25.82881                   | 1.367017024                             | -0.82421875                           | Higher in EMT/6 Control | Q6ZWY9;Q64525;I | Q6ZWY9;Q64525;I         |
| 27.67303                       | 28.4073                        | 28.20303                        | 27.58978                   | 27.16997                   | 27.07112                   | 1.408182586                             | -0.817498525                          | Higher in EMT/6 Control | P24604;Q8CFK4;Q | P24604;Q8CFK4;Q         |
| 33.64151                       | 33.69437                       | 33.58665                        | 32.80424                   | 32.81574                   | 32.85712                   | 4.69994023                              | -0.815141042                          | Higher in EMT/6 Control | O09159          | O09159                  |
| 29.57542                       | 29.69666                       | 29                              |                            |                            |                            |                                         |                                       |                         |                 |                         |

|          |          |          |          |          |          |             |              |                         |                  |                  |
|----------|----------|----------|----------|----------|----------|-------------|--------------|-------------------------|------------------|------------------|
| 28.87701 | 29.05051 | 28.94838 | 28.31527 | 28.23535 | 28.29351 | 3.580388975 | -0.677254995 | Higher in EMT/6 Control | G3UXZ5;P97371;G  | G3UXZ5;P97371;G  |
| 27.72598 | 27.71947 | 27.5969  | 27.01903 | 27.06085 | 26.93157 | 3.550251828 | -0.676969528 | Higher in EMT/6 Control | Q8B6Z6;P51569;A  | Q8B6Z6;P51569    |
| 26.44770 | 26.89735 | 27.24445 | 26.36786 | 26.36119 | 26.1757  | 1.922094115 | -0.671372732 | Higher in EMT/6 Control | Q64442           | Q64442           |
| 27.1795  | 27.42342 | 27.22619 | 26.55947 | 26.61807 | 26.64581 | 1.927069398 | -0.668585459 | Higher in EMT/6 Control | AOA0G2JEK2;P632  | AOA0G2JEK2;P632  |
| 28.76762 | 28.84146 | 28.84146 | 28.18423 | 28.10149 | 28.20303 | 4.098033325 | -0.653926849 | Higher in EMT/6 Control | Q9VWVA4;AOA0A6   | Q9VWVA4;AOA0A6   |
| 30.45317 | 30.45317 | 30.36202 | 29.78332 | 29.73409 | 29.79266 | 4.293305565 | -0.652766546 | Higher in EMT/6 Control | P47880           | P47880           |
| 29.73117 | NaN      | 25.81665 | 25.18329 | 25.11744 | 25.06907 | 2.926793142 | -0.650648753 | Higher in EMT/6 Control | Q9WVTP6;F7B9P55  | Q9WVTP6          |
| 24.54628 | 24.83846 | 24.96279 | 24.10149 | 24.1795  | 24.11744 | 2.176403437 | -0.649699529 | Higher in EMT/6 Control | AOA0A0MQM7;OC    | AOA0A0MQM7;OC    |
| 22.33756 | 22.20955 | 22.21549 | NaN      | 21.67573 | 21.54981 | 2.535361647 | -0.64143308  | Higher in EMT/6 Control | B1ASW5;B1ASW6    | B1ASW5;B1ASW6    |
| 27.07112 | 27.33245 | 26.98685 | 26.51352 | 26.40568 | 26.29580 | 2.314606995 | -0.638710022 | Higher in EMT/6 Control | Q8CG19;B1B1E2    | Q8CG19;B1B1E2    |
| 28.64238 | 28.94    | 28.70965 | 28.16519 | 27.98142 | 28.23535 | 2.247496732 | -0.636688232 | Higher in EMT/6 Control | Q6P117;P25785;B  | Q6P117;P25785;B  |
| 29.22389 | 29.46879 | 29.20769 | 28.70965 | 28.62157 | 28.70636 | 2.649255904 | -0.620933533 | Higher in EMT/6 Control | P37889           | P37889           |
| 23.88577 | 24.2535  | 24.00196 | 23.23169 | 23.54038 | 23.55215 | 1.796866098 | -0.605665207 | Higher in EMT/6 Control | Q9VVA2;Q4FZG7    | Q9VVA2;Q4FZG7    |
| 24.84805 | 24.5285  | 24.93607 | 23.96719 | 24.32389 | 24.22435 | 1.670310521 | -0.599063238 | Higher in EMT/6 Control | Q8CCH2           | Q8CCH2           |
| 29.1866  | 29.35993 | 29.0531  | 28.63547 | 28.65949 | 28.509   | 2.401650727 | -0.598557154 | Higher in EMT/6 Control | P11688           | P11688           |
| 25.42982 | 25.12534 | 25.18329 | 24.6492  | 24.54038 | 24.74919 | 2.227822378 | -0.59465154  | Higher in EMT/6 Control | AOA1N9M4K1;AOA   | AOA1N9M4K1;AOA   |
| 29.62506 | 29.64924 | 29.69644 | 29.03748 | 29.08639 | 29.06856 | 4.375018134 | -0.592772166 | Higher in EMT/6 Control | A2AS98;P28660;C  | A2AS98;P28660;C  |
| 28.02433 | 28.05569 | 27.9428  | 27.33245 | 27.60399 | 27.31527 | 2.95060368  | -0.590366364 | Higher in EMT/6 Control | P70349;BOR1E3    | P70349;BOR1E3    |
| 23.93157 | 23.90426 | NaN      | 23.35111 | 23.46762 | 23.16423 | 1.848848092 | -0.590262413 | Higher in EMT/6 Control | O70421           | O70421           |
| 28.34942 | 28.4512  | 28.2535  | 27.75175 | 27.65949 | 27.87994 | 2.625657287 | -0.587649663 | Higher in EMT/6 Control | Q9D0F9;A2CEK3    | Q9D0F9;A2CEK3    |
| 23.49905 | 32.53659 | 32.51559 | 31.90813 | 31.91171 | 31.9746  | 4.764627743 | -0.58559672  | Higher in EMT/6 Control | G3X9T8;G3X8Q5    | G3X9T8;G3X8Q5    |
| 25.90426 | 25.97596 | 25.76951 | 25.19084 | 25.28207 | 25.42021 | 2.539825845 | -0.585538864 | Higher in EMT/6 Control | Q9WVTS;E9PUVA    | Q9WVTS           |
| 26.86231 | 26.87408 | 26.97596 | 26.41538 | 26.31354 | 26.22803 | 3.072210652 | -0.585133235 | Higher in EMT/6 Control | Q8B6D9           | Q8B6D9           |
| 25.13712 | 25.43936 | 25.49228 | 24.84326 | 24.60399 | 24.87173 | 1.857299287 | -0.583258311 | Higher in EMT/6 Control | P56812;D3Z7Q5    | P56812;D3Z7Q5    |
| 25.41377 | 25.86703 | 25.37782 | 24.94056 | 24.94949 | 25.02371 | 1.66038175  | -0.581769943 | Higher in EMT/6 Control | P97821;D3Z220    | P97821           |
| 27.76446 | 28.07112 | 28.06085 | 27.23535 | 27.30661 | 27.61105 | 1.179101873 | -0.581141154 | Higher in EMT/6 Control | AOA1W2P6L9;Q3U   | AOA1W2P6L9;Q3U   |
| 30.33031 | 30.34096 | 30.23078 | 29.80655 | 29.68311 | 29.67472 | 3.331316275 | -0.579221725 | Higher in EMT/6 Control | Q7TM88;AOA0R4J   | Q7TM88;AOA0R4J   |
| 31.35153 | 31.2814  | 31.39816 | 30.69644 | 30.72923 | 30.87555 | 3.058085042 | -0.576622009 | Higher in EMT/6 Control | Q60963;E9Q330    | Q60963;E9Q330    |
| 27.58262 | 27.86821 | 27.70777 | 27.09144 | 27.7142  | 27.15074 | 2.341342815 | -0.56933403  | Higher in EMT/6 Control | D3Z3G6;Q63844;A  | D3Z3G6;Q63844;A  |
| 29.29351 | 29.258   | 29.59156 | 29.04531 | 28.82941 | 28.56092 | 1.500174306 | -0.569141388 | Higher in EMT/6 Control | Q9DCK3;D3Z0B7;C  | Q9DCK3;D3Z0B7;C  |
| 27.04009 | 26.64581 | 27.0296  | 26.40046 | 26.26964 | 26.33586 | 1.863418878 | -0.568651835 | Higher in EMT/6 Control | Q8BUI2;D3YXN7;D  | Q8BUI2;D3YXN7;D  |
| 30.65438 | 30.59335 | 30.64581 | 30.06805 | 30.07368 | 30.06085 | 5.072144227 | -0.566053391 | Higher in EMT/6 Control | P34884           | P34884           |
| 33.68395 | 33.33031 | 33.73529 | 33.06728 | 33.07846 | 33.29092 | 1.820513572 | -0.564633687 | Higher in EMT/6 Control | Q07797;E9QSX5    | Q07797           |
| 26.71293 | 26.81421 | 26.82639 | 26.27675 | 26.09748 | 26.29614 | 2.817765791 | -0.561050415 | Higher in EMT/6 Control | P13745;Q6P8Q0;D  | P13745;Q6P8Q0;D  |
| 27.76446 | 27.99226 | 27.73247 | 27.34096 | 27.34096 | 27.13124 | 2.18375626  | -0.558676402 | Higher in EMT/6 Control | P61089;AOA1W2P   | P61089           |
| 29.54995 | 29.79885 | 29.58082 | 29.04791 | 29.13858 | 29.07112 | 2.593210815 | -0.557336807 | Higher in EMT/6 Control | Q99L84;D3YTL5;P  | Q99L84;D3YTL5;P  |
| 31.27031 | 31.38792 | 31.16639 | 30.70471 | 30.70471 | 30.74535 | 2.98042727  | -0.556615829 | Higher in EMT/6 Control | P60766;G3UZM2;   | P60766           |
| 27.52402 | 27.73247 | 27.45513 | 26.97596 | 26.97596 | 27.09144 | 2.425620289 | -0.556084951 | Higher in EMT/6 Control | Q9WVE8           | Q9WVE8           |
| 25.82396 | 25.58692 | 25.76699 | 25.22803 | 25.03171 | 25.24989 | 2.297346552 | -0.556083043 | Higher in EMT/6 Control | Q6NXL1           | Q6NXL1           |
| 23.67573 | 23.68703 | 23.86703 | 22.91519 | 23.20658 | 23.35111 | 1.596441791 | -0.545773188 | Higher in EMT/6 Control | Q3UG85;Q9J15;D   | Q3UG85;Q9J15;D   |
| 27.49381 | 27.20769 | 27.52402 | 26.92025 | 26.85043 | 26.82639 | 2.18221965  | -0.542819341 | Higher in EMT/6 Control | P26883;F6X9I3    | P26883           |
| 27.90885 | 28.12139 | 27.97596 | 27.38278 | 27.47846 | 27.51653 | 2.78249016  | -0.54281044  | Higher in EMT/6 Control | Q61187;AOA1B0G   | Q61187;AOA1B0G   |
| 28.15557 | 28.30226 | 28.05569 | 27.75175 | 27.56819 | 27.56819 | 2.344075962 | -0.541794459 | Higher in EMT/6 Control | Q9C5Y8;AOA0N4S   | Q9C5Y8;AOA0N4S   |
| 29.83244 | 29.99496 | 29.84146 | 29.36411 | 29.27808 | 29.40324 | 2.959415105 | -0.54114151  | Higher in EMT/6 Control | Q00493           | Q00493           |
| 28.96224 | 28.17474 | 28.9547  | 28.46684 | 28.54628 | 28.47073 | 3.679359802 | -0.537534078 | Higher in EMT/6 Control | Q9J129;Q5F284    | Q9J129;Q5F284    |
| 29.13614 | 29.23763 | 29.27808 | 28.66289 | 28.51653 | 28.6526  | 2.091304007 | -0.53572464  | Higher in EMT/6 Control | P48759           | P48759           |
| 28.95671 | 29.18896 | 28.97049 | 28.45905 | 28.48616 | 28.56819 | 2.541524105 | -0.534252167 | Higher in EMT/6 Control | Q5E8P8;P49312    | Q5E8P8;P49312    |
| 30.41337 | 30.60222 | 30.52962 | 30.00838 | 29.95394 | 29.98142 | 3.114299048 | -0.533825556 | Higher in EMT/6 Control | Q3UW53;E9PVVA4   | Q3UW53;E9PVVA4   |
| 25.90885 | 25.76192 | 25.44884 | 25.87853 | 25.72785 | 25.22435 | 2.559059327 | -0.532606125 | Higher in EMT/6 Control | Q62422           | Q62422           |
| 27.12139 | 27.13124 | 27.04009 | 26.51051 | 26.51503 | 26.67303 | 3.026398694 | -0.531385422 | Higher in EMT/6 Control | O82807           | O82807           |
| 25.08492 | 25.1757  | 25.01903 | 25.04446 | 25.01653 | 25.47034 | 2.789816234 | -0.53094101  | Higher in EMT/6 Control | G5E8J0;O35516    | G5E8J0;O35516    |
| 24.74407 | 24.7024  | 24.58692 | 24.09346 | 24.09346 | 24.20609 | 2.716212037 | -0.528593063 | Higher in EMT/6 Control | Q5SUT0;Q5SUS9;C  | Q5SUT0;Q5SUS9;C  |
| 28.54259 | 28.42742 | 28.62157 | 28.06085 | 28.04009 | 27.90885 | 2.693112541 | -0.527263641 | Higher in EMT/6 Control | Q62433;E9Q514;E  | Q62433           |
| 29.8279  | 30.00838 | 29.80347 | 29.31527 | 29.45905 | 29.29351 | 2.49408173  | -0.523976644 | Higher in EMT/6 Control | P23780;AOA115S   | P23780           |
| 31.74134 | 31.91883 | 31.75732 | 31.31419 | 31.24785 | 31.28692 | 3.023565862 | -0.522843043 | Higher in EMT/6 Control | Q61508;D3Z0U9;C  | Q61508           |
| 31.81192 | 31.88285 | 31.7692  | 31.34096 | 31.2535  | 31.30334 | 3.629758574 | -0.522055308 | Higher in EMT/6 Control | Q9DB11;O70250    | Q9DB11           |
| 29.7973  | 29.95394 | 29.79421 | 29.41941 | 29.26024 | 29.30443 | 3.735975783 | -0.520452499 | Higher in EMT/6 Control | P70296;D3Z1V4;D  | P70296;D3Z1V4;D  |
| 26.89735 | 27.04009 | 26.89735 | 26.43141 | 26.31527 | 26.54185 | 2.507076178 | -0.515418371 | Higher in EMT/6 Control | AP6W55           | AP6W55           |
| 32.98142 | 32.8792  | 33.07208 | 32.45807 | 32.48951 | 32.44825 | 3.068970382 | -0.512289683 | Higher in EMT/6 Control | P09411;S4R2M7    | P09411;S4R2M7    |
| 27.80193 | 27.87408 | 27.78352 | 27.27142 | 27.2535  | 27.39917 | 3.173477262 | -0.511747996 | Higher in EMT/6 Control | Q80XK6;Q20B00;C  | Q80XK6;Q20B00;C  |
| 31.94349 | 32.04466 | 32.06085 | 31.48712 | 31.51089 | 31.52496 | 3.729131621 | -0.508681615 | Higher in EMT/6 Control | Q9WU78           | Q9WU78           |
| 23.97596 | 23.93124 | NaN      | 23.42982 | 23.44253 | 23.48001 | 3.548377242 | -0.502981186 | Higher in EMT/6 Control | D3Z3J6;G3UYE5;F  | D3Z3J6;G3UYE5;F  |
| 30.44332 | 30.57542 | 30.52028 | 30.00838 | 30.02168 | 30.00838 | 3.690713861 | -0.500192642 | Higher in EMT/6 Control | Q99K85;Q3UG69;C  | Q99K85;Q3UG69;C  |
| 32.5038  | 32.48472 | 32.42342 | 31.89735 | 32.08004 | 31.93649 | 2.921273781 | -0.499348958 | Higher in EMT/6 Control | P17742;AOA115S   | P17742;AOA115S   |
| 27.89157 | 28.04531 | 27.89735 | 27.31527 | 27.47073 | 27.53862 | 2.35351801  | -0.498203913 | Higher in EMT/6 Control | O88325           | O88325           |
| 32.13001 | 32.23964 | 32.23964 | 31.74134 | 31.61982 | 31.80809 | 2.623683655 | -0.496592204 | Higher in EMT/6 Control | MOQWP1;Z4YK85;   | MOQWP1;Z4YK85;   |
| 29.03486 | 29.25124 | 29.06085 | 28.63201 | 28.6764  | 28.56092 | 2.533273289 | -0.492537816 | Higher in EMT/6 Control | Q8R1F1;A2AR5E;   | Q8R1F1           |
| 31.24218 | 31.23649 | 31.32496 | 30.83846 | 30.77706 | 30.71293 | 3.356817171 | -0.491727829 | Higher in EMT/6 Control | P10649;A2AE89;F  | P10649;A2AE89;F  |
| 24.239   | 24.317   | 24.05258 | 23.62087 | 23.79947 | 23.72858 | 2.177826446 | -0.486554464 | Higher in EMT/6 Control | E9Q9N9;Q8VCR7;C  | E9Q9N9;Q8VCR7;C  |
| 27.76129 | 31.81574 | 31.90096 | 31.38792 | 31.31959 | 31.33565 | 3.331379886 | -0.478277206 | Higher in EMT/6 Control | Q02819;AOA1C7C   | Q02819;AOA1C7C   |
| 32.85527 | 32.91705 | 33.00336 | 32.4919  | 32.4007  | 32.44825 | 3.163047011 | -0.478275299 | Higher in EMT/6 Control | P05064;A6Z144;D3 | P05064;A6Z144;D3 |
| 28.68646 | 28.88577 | 28.7923  | 28.37451 | 28.21697 | 28.28472 | 2.479759354 | -0.475084941 | Higher in EMT/6 Control | P97372;G3X9V0;E  | P97372;G3X9V0;E  |
| 26.92025 | 26.96499 | 26.64581 | 26.37617 | 26.26429 | 26.46918 | 1.820706744 | -0.474410375 | Higher in EMT/6 Control | Q61205;D3Z7E6;D  | Q61205;D3Z7E6;D  |
| 32.04791 | 32.08639 | 32.03157 | 31.59779 | 31.55728 | 31.59335 | 4.660933437 | -0.47248586  | Higher in EMT/6 Control | E9Q616;G5E8K8    | E9Q616           |
| 32.37762 | 32.41869 | 32.34096 | 31.79266 | 32.00169 | 31.79245 | 3.172796802 | -0.470221837 | Higher in EMT/6 Control | P17751;H7BXC3    | P17751;H7BXC3    |
| 25.88809 | 25.98468 | 25.87643 | 25.39428 | 25.62923 | 25.317   | 2.030582111 | -0.469563802 | Higher in EMT/6 Control | Q9CQM5           | Q9CQM5           |
| 27.81421 | 27.84212 | 27.87994 | 27.47846 | 27.45513 | 27.29789 | 3.468486786 | -0.468486786 | Higher in EMT/6 Control | Q9CQ60;Q8CBG6;J  | Q9CQ60;Q8CBG6;J  |
| 32.90992 | 32.96774 | 32.71088 | 32.3956  | 32.27864 | 32.52262 | 1.938829659 | -0.463891347 | Higher in EMT/6 Control | E9PX70;Q60847;F  | E9PX70;Q60847    |
| 27.67303 | 27.98685 | 27.89735 | 27.5     |          |          |             |              |                         |                  |                  |

|          |          |          |          |          |             |             |              |                         |                  |                  |
|----------|----------|----------|----------|----------|-------------|-------------|--------------|-------------------------|------------------|------------------|
| 33.00838 | 33.05924 | 33.15285 | 32.66713 | 32.74535 | 32.70058    | 2.813250172 | -0.369141897 | Higher in EMT/6 Control | P16045           | P16045           |
| 31.94349 | 32.09899 | 32.08322 | 31.68395 | 31.66289 | 31.69229    | 2.709067312 | -0.362191518 | Higher in EMT/6 Control | D3Z2H9;D3YVRO    | D3Z2H9           |
| 31.50142 | 31.20186 | 31.54352 | 31.19601 | 31.20186 | 31.20082717 | 3.30082717  | -0.360883713 | Higher in EMT/6 Control | P40142;AOA286YE  | P40142;AOA286YE  |
| 30.19601 | 30.26472 | 30.11148 | 29.83996 | 29.80655 | 29.84446    | 2.847286833 | -0.360414505 | Higher in EMT/6 Control | Q8C253;P16110    | Q8C253;P16110    |
| 29.99496 | 29.98142 | 30.16039 | 29.64065 | 29.6981  | 29.71947    | 2.352648798 | -0.359516144 | Higher in EMT/6 Control | Q3TMMXO;O08992;J | Q3TMMXO;O08992;J |
| 29.64238 | 29.80193 | 29.68646 | 29.41135 | 29.31095 | 29.33458    | 2.500587753 | -0.357962926 | Higher in EMT/6 Control | P58242           | P58242           |
| 28.04009 | 28.22159 | 28.04009 | 27.75175 | 27.80089 | 27.67976    | 2.121700934 | -0.354059219 | Higher in EMT/6 Control | Q91V35;P18052;A  | Q91V35;P18052    |
| 28.74535 | 28.91456 | 28.75494 | 28.52402 | 28.41941 | 28.41538    | 2.239832464 | -0.352010091 | Higher in EMT/6 Control | D3Z6I8;E9Q7Q3    | D3Z6I8;E9Q7Q3    |
| 31.61982 | 31.65864 | 31.54352 | 31.21928 | 31.28692 | 31.2814     | 2.994725581 | -0.344790141 | Higher in EMT/6 Control | AOA2CF2D2;Q07    | AOA2CF2D2;Q07    |
| 33.70404 | 33.78488 | 33.91528 | 33.49429 | 33.50616 | 33.5527     | 2.885901927 | -0.339014689 | Higher in EMT/6 Control | P20152;AOA0A6VY  | P20152;AOA0A6VY  |
| 27.79576 | 27.90311 | 27.87994 | 27.58978 | 27.45513 | 27.52402    | 2.571949004 | -0.336622874 | Higher in EMT/6 Control | Q80X71;D3Z191;D  | Q80X71;D3Z191;D  |
| 30.96774 | 31.0414  | 31.0544  | 30.70471 | 30.70471 | 30.67135    | 3.445334323 | -0.327591578 | Higher in EMT/6 Control | Q6IRU2           | Q6IRU2           |
| 26.65949 | 27.66446 | 26.82639 | 26.39428 | 26.41377 | 26.48155    | 2.35102111  | -0.320246379 | Higher in EMT/6 Control | AOA0G2JDI4;O091  | AOA0G2JDI4;O091  |
| 28.84446 | 28.94559 | 28.83244 | 28.60399 | 28.54259 | 28.54259    | 2.710504074 | -0.319787979 | Higher in EMT/6 Control | Q6ZQ38;D3YWC5    | Q6ZQ38           |
| 30.16039 | 30.11148 | 30.24218 | 29.78488 | 29.87262 | 29.89735    | 2.475748262 | -0.319733302 | Higher in EMT/6 Control | Q8BH64;D3Z7U7    | Q8BH64           |
| 29.10149 | 29.19131 | 29.15074 | 28.84745 | 28.83545 | 28.81421    | 2.65815651  | -0.315477371 | Higher in EMT/6 Control | AOA0A6YY47;P135  | AOA0A6YY47;P135  |
| 30.60222 | 30.72923 | 30.66289 | 30.37244 | 30.37244 | 30.30878    | 2.749924628 | -0.313562393 | Higher in EMT/6 Control | P08228           | P08228           |
| 31.82335 | 31.80424 | 31.84221 | 31.49667 | 31.54812 | 31.49667    | 3.962175428 | -0.30945015  | Higher in EMT/6 Control | F8WIT2           | F8WIT2           |
| 31.91171 | 31.99833 | 31.86821 | 31.63288 | 31.65438 | 31.61544    | 2.73216509  | -0.291851044 | Higher in EMT/6 Control | Q64277;AOA0R4I1  | Q64277;AOA0R4I1  |
| 28.85341 | 28.81115 | 28.79885 | 28.5862  | 28.509   | 28.50522    | 2.711597195 | -0.287663142 | Higher in EMT/6 Control | Q06890;E9PUU2;E  | Q06890;E9PUU2;E  |
| 29.09396 | 29.01903 | 29.02697 | 28.81115 | 28.76762 | 28.72273    | 2.880986205 | -0.279485703 | Higher in EMT/6 Control | E9PYT3;Q91YH5;C  | E9PYT3;Q91YH5    |
| 32.2814  | 32.26752 | 32.35678 | 32.58442 | 32.58889 | 32.57768    | 3.265926449 | -0.281758626 | Higher in EMT/6 RT      | P08113;F7C312    | P08113;F7C312    |
| 28.62157 | 28.67303 | 28.64924 | 28.79994 | 28.95116 | 28.98685    | 3.295054581 | -0.291366577 | Higher in EMT/6 RT      | P61161           | P61161           |
| 33.35678 | 33.34631 | 33.40831 | 33.59779 | 33.69437 | 33.70471    | 2.776810938 | -0.296053569 | Higher in EMT/6 RT      | P20029           | P20029           |
| 30.18423 | 30.13614 | 30.2535  | 30.5389  | 30.46295 | 30.46295    | 2.658596144 | -0.296976089 | Higher in EMT/6 RT      | Q99Y19;AOA087W   | Q99Y19           |
| 28.56819 | 28.65949 | 28.61456 | 28.91171 | 28.91456 | 28.93438    | 3.443336421 | -0.306136449 | Higher in EMT/6 RT      | Q8K2B3;AOA1Y7V   | Q8K2B3           |
| 28.29351 | 28.42742 | 28.35783 | 28.67976 | 28.67976 | 28.61456    | 2.537833234 | -0.307303747 | Higher in EMT/6 RT      | Q80ZP8;Q3TMMX;F  | Q80ZP8;Q3TMMX;F  |
| 29.32603 | 29.33031 | 29.36202 | 29.61456 | 29.60399 | 29.7597     | 2.466519535 | -0.319965998 | Higher in EMT/6 RT      | Q9D1R9;AOA0G2J   | Q9D1R9;AOA0G2J   |
| 27.18896 | 27.08132 | 27.12139 | 27.43141 | 27.42342 | 27.50142    | 2.885815299 | -0.321531296 | Higher in EMT/6 RT      | Q9CYN9           | Q9CYN9           |
| 27.05051 | 27.1795  | 27.04009 | 27.391   | 27.43141 | 27.42342    | 2.657708925 | -0.325245539 | Higher in EMT/6 RT      | A2AL50;Q8C01I;H  | A2AL50;Q8C01I;H  |
| 30.42342 | 30.42342 | 30.47267 | 30.73731 | 30.7692  | 30.79266    | 3.687696838 | -0.326551437 | Higher in EMT/6 RT      | P61358;A2AAQ0    | P61358;A2AAQ0    |
| 26.42502 | 26.54038 | 26.55801 | 26.92025 | 26.77706 | 26.82639    | 3.21115308  | -0.333429337 | Higher in EMT/6 RT      | E9Q175;E9Q3L1;E  | E9Q175;E9Q3L1;E  |
| 30.90455 | 30.95394 | 30.94    | 31.2814  | 31.22504 | 31.29242    | 3.702943192 | -0.333459218 | Higher in EMT/6 RT      | P62754           | P62754           |
| 31.06085 | 31.10525 | 31.06085 | 31.44825 | 31.40324 | 31.38278    | 3.795094962 | -0.335776011 | Higher in EMT/6 RT      | P62281;AOA1B0G   | P62281;AOA1B0G   |
| 31.28692 | 31.35153 | 31.31959 | 31.61544 | 31.66289 | 31.69229    | 3.498492261 | -0.337527593 | Higher in EMT/6 RT      | P62908;D3YV43;A  | P62908;D3YV43;A  |
| 33.78488 | 33.69437 | 33.71498 | 34.05924 | 34.12332 | 34.10263    | 3.001069784 | -0.337991079 | Higher in EMT/6 RT      | P05213           | P05213           |
| 31.61982 | 31.67976 | 31.6501  | 32.04466 | 32.01837 | 31.90455    | 2.732226803 | -0.339297613 | Higher in EMT/6 RT      | Q9D8E6           | Q9D8E6           |
| 27.60399 | 27.58262 | 27.45513 | 27.80193 | 27.95394 | 27.90885    | 2.205927274 | -0.340990702 | Higher in EMT/6 RT      | P51655           | P51655           |
| 31.13614 | 31.27586 | 31.22504 | 31.4919  | 31.61544 | 31.5527     | 2.486290052 | -0.341008075 | Higher in EMT/6 RT      | P12970;AOA140T8  | P12970;AOA140T8  |
| 28.5969  | 28.54995 | 28.70965 | 29.01372 | 28.89885 | 28.98885    | 2.462806894 | -0.342305501 | Higher in EMT/6 RT      | AOA0G2JDW7;Q62   | AOA0G2JDW7;Q62   |
| 31.47267 | 31.59779 | 31.47267 | 31.8347  | 31.85341 | 31.88285    | 3.833531561 | -0.342611949 | Higher in EMT/6 RT      | P25444;AOA140T8  | P25444;AOA140T8  |
| 29.01105 | 29.21236 | 29.17236 | 29.4453  | 29.49381 | 29.4919     | 2.253748407 | -0.345085144 | Higher in EMT/6 RT      | O54734           | O54734           |
| 29.27586 | 29.43936 | 29.30661 | 29.67077 | 29.71129 | 29.60045    | 2.124393059 | -0.35356013  | Higher in EMT/6 RT      | Q99K10           | Q99K10           |
| 29.2803  | 29.38278 | 29.2389  | 29.88144 | 29.5862  | 29.69312    | 2.468897916 | -0.357931773 | Higher in EMT/6 RT      | P49817;H3BKGO;D  | P49817;H3BKGO;D  |
| 28.51653 | 28.31527 | 28.33245 | 28.74214 | 28.78955 | 28.70965    | 2.19906437  | -0.359027863 | Higher in EMT/6 RT      | O8B865;A2AGN7;F  | O8B865;A2AGN7;F  |
| 30.55728 | 30.6372  | 30.5389  | 30.95394 | 30.89012 | 30.96774    | 3.135287922 | -0.359474182 | Higher in EMT/6 RT      | P62717;AOA1D5R   | P62717;AOA1D5R   |
| 24.50446 | 24.75939 | 24.65403 | 24.98468 | 25.03171 | 24.99766    | 2.080808075 | -0.365388234 | Higher in EMT/6 RT      | AOA11150A4;Q9E   | AOA11150A4;Q9E   |
| 33.74535 | 33.80424 | 33.66289 | 34.09899 | 34.08322 | 34.14528    | 2.929916158 | -0.371667226 | Higher in EMT/6 RT      | E9P216           | E9P216           |
| 27.26249 | 27.47073 | 27.22619 | 27.22619 | 27.22619 | 27.22619    | 2.073404477 | -0.377538045 | Higher in EMT/6 RT      | Q8BH95           | Q8BH95           |
| 31.45317 | 31.30334 | 31.45807 | 31.81955 | 31.74535 | 31.80809    | 2.641339231 | -0.386135737 | Higher in EMT/6 RT      | P27659;AOA087W   | P27659           |
| 30.33031 | 30.33031 | 30.4334  | 30.67135 | 30.71293 | 30.86821    | 2.29931721  | -0.386150996 | Higher in EMT/6 RT      | Q8BMK4           | Q8BMK4           |
| 27.93157 | 28.18423 | 28.07112 | 28.43936 | 28.4746  | 28.44332    | 2.209075183 | -0.390120824 | Higher in EMT/6 RT      | Q9D051           | Q9D051           |
| 31.54812 | 31.50142 | 31.51089 | 31.94349 | 31.87188 | 31.92592    | 3.965751565 | -0.393623988 | Higher in EMT/6 RT      | P47911           | P47911           |
| 29.13858 | 29.11892 | 29.17712 | 29.46684 | 29.59513 | 29.56819    | 3.137159757 | -0.398513158 | Higher in EMT/6 RT      | P54071;D6RIL6;AC | P54071           |
| 27.11148 | 26.99766 | 27.11148 | 27.391   | 27.56819 | 27.46295    | 2.479953848 | -0.400510788 | Higher in EMT/6 RT      | P57759;F8WJIA;F8 | P57759           |
| 29.81879 | 29.88867 | 29.92592 | 30.28692 | 30.2535  | 30.29789    | 3.52569325  | -0.401642481 | Higher in EMT/6 RT      | P62889           | P62889           |
| 27.23535 | 27.13124 | 27.07112 | 27.52402 | 27.55362 | 27.56819    | 2.89920849  | -0.402709961 | Higher in EMT/6 RT      | E9Q800;Q8CAQ8;F  | E9Q800;Q8CAQ8;F  |
| 28.52028 | 28.45513 | 28.48232 | 28.78644 | 29.0296  | 28.85341    | 2.241784193 | -0.403905869 | Higher in EMT/6 RT      | P49787;D3YZN5    | P49787           |
| 30.34096 | 30.47267 | 30.40324 | 30.85341 | 30.73731 | 30.83846    | 2.80850175  | -0.404103597 | Higher in EMT/6 RT      | P35564           | P35564           |
| 27.82639 | 28.00838 | 27.96499 | 28.24898 | 28.47073 | 28.29351    | 2.011755229 | -0.404486338 | Higher in EMT/6 RT      | Q9CV50;AOA286Y   | Q9CV50;AOA286Y   |
| 31.39305 | 31.34096 | 31.40324 | 31.77706 | 31.75732 | 31.84595    | 3.631742089 | -0.414361318 | Higher in EMT/6 RT      | P97351           | P97351           |
| 30.29789 | 30.29789 | 30.40324 | 30.79266 | 30.76129 | 30.69644    | 3.118541945 | -0.41711998  | Higher in EMT/6 RT      | P10605           | P10605           |
| 28.77392 | 29.00035 | 28.98414 | 29.33671 | 29.26696 | 29.4073     | 2.126990583 | -0.417523066 | Higher in EMT/6 RT      | P62852;AOA1150   | P62852;AOA1150   |
| 30.52028 | 30.56638 | 30.61982 | 30.94698 | 30.99496 | 31.03486    | 3.164362307 | -0.423440933 | Higher in EMT/6 RT      | P62918           | P62918           |
| 27.29789 | 27.2803  | 27.44727 | 27.76446 | 27.73892 | 27.80809    | 2.785424938 | -0.428670883 | Higher in EMT/6 RT      | Q8BM51           | Q8BM51           |
| 26.92025 | 26.82639 | 27.04009 | 27.42342 | 27.29789 | 27.35783    | 2.413467303 | -0.430805206 | Higher in EMT/6 RT      | Q91XV3           | Q91XV3           |
| 30.67976 | 30.72923 | 30.75334 | 31.04791 | 31.17831 | 31.23649    | 2.715728086 | -0.433458964 | Higher in EMT/6 RT      | P14131           | P14131           |
| 29.66797 | 29.68799 | 29.68646 | 29.94    | 30.12386 | 30.06085    | 2.101718594 | -0.433832169 | Higher in EMT/6 RT      | Q9CQM8;O09167    | Q9CQM8;O09167    |
| 27.33245 | 27.3662  | 27.10149 | 27.64881 | 27.77706 | 27.67976    | 2.037103574 | -0.434165955 | Higher in EMT/6 RT      | E9Q824;E9Q829;D  | E9Q824;E9Q829;D  |
| 26.48308 | 26.58978 | 26.4346  | 26.97596 | 26.95394 | 26.98735    | 2.987821743 | -0.439929326 | Higher in EMT/6 RT      | Q9WUM5;AOA00N    | Q9WUM5           |
| 33.05278 | 33.09428 | 33.08163 | 33.51794 | 33.52962 | 33.51794    | 5.380074373 | -0.445603689 | Higher in EMT/6 RT      | P27773;F6Q404    | P27773           |
| 30.17236 | 30.16039 | 30.23078 | 30.61105 | 30.52962 | 30.76129    | 2.479013909 | -0.446146011 | Higher in EMT/6 RT      | P41105;F6Z000    | P41105           |
| 31.78097 | 31.78488 | 31.77313 | 32.21928 | 32.2135  | 32.25068    | 5.490936437 | -0.448156357 | Higher in EMT/6 RT      | P62702;V9GWVYO   | P62702           |
| 30.21928 | 30.06085 | 30.20769 | 30.64581 | 30.62854 | 30.56638    | 2.877142856 |              |                         |                  |                  |

|          |          |          |           |          |          |             |             |                    |                 |                 |
|----------|----------|----------|-----------|----------|----------|-------------|-------------|--------------------|-----------------|-----------------|
| 32.4775  | 32.57768 | 32.65651 | 33.11613  | 33.08797 | 33.10212 | 3.273141499 | 0.531511943 | Higher in EMT/6 RT | P14211          | P14211          |
| 26.89735 | 27.10149 | 26.61807 | 27.35783  | 27.5389  | 27.31527 | 1.567632632 | 0.531696955 | Higher in EMT/6 RT | K3W4T3;Q9Z1G4;  | K3W4T3;Q9Z1G4   |
| 26.99766 | 27.25642 | 27.83244 | 27.57542  | 27.83244 | 27.69312 | 0.532278697 | 0.532278697 | Higher in EMT/6 RT | P32921          | P32921          |
| 27.49381 | 27.509   | 27.3662  | 27.9428   | 28.01372 | 28.01372 | 3.32419945  | 0.533742269 | Higher in EMT/6 RT | P83882;A0A06Y   | P83882;A0A06Y   |
| 23.88577 | 24.31008 | 24.17188 | 24.76446  | 24.54628 | 24.65399 | 1.72537795  | 0.5341657   | Higher in EMT/6 RT | A0A140L2T;O88A  | A0A140L2T;O88A  |
| 27.48616 | 27.35783 | 27.4073  | 27.92025  | 28.03486 | 27.90311 | 3.18352488  | 0.535642624 | Higher in EMT/6 RT | Q8R0X4;Q32MW3   | Q8R0X4;Q32MW3   |
| 25.10501 | 25.60116 | 25.47383 | 26.06291  | 25.99981 | 26.13712 | 3.218660528 | 0.538113912 | Higher in EMT/6 RT | Q8C5N9;O88736   | Q8C5N9;O88736   |
| 29.3662  | 29.61632 | 29.391   | 30.03486  | 29.95394 | 30.02168 | 2.549282546 | 0.54565239  | Higher in EMT/6 RT | Q8BMD8          | Q8BMD8          |
| 27.0296  | 27.33245 | 27.09144 | 27.91456  | 27.58262 | 27.60399 | 1.748488771 | 0.549222994 | Higher in EMT/6 RT | P50518;A0A0N4S  | P50518;A0A0N4S  |
| 28.82941 | 29.13446 | 28.8446  | 28.84441  | 29.48808 | 29.46879 | 1.26245363  | 0.557979584 | Higher in EMT/6 RT | P62814;Q91YH6A  | P62814          |
| 26.07725 | 25.87643 | 25.90196 | 26.68646  | 26.38607 | 26.46295 | 2.153090174 | 0.559948603 | Higher in EMT/6 RT | P56382          | P56382          |
| 27.58262 | 28.0296  | 27.92592 | 28.60752  | 28.33245 | 28.2803  | 1.531386993 | 0.560708364 | Higher in EMT/6 RT | P62900;A0A06Y   | P62900;A0A06Y   |
| 29.77392 | 29.91171 | 29.64238 | 30.2535   | 30.47267 | 30.28692 | 2.253874916 | 0.561693192 | Higher in EMT/6 RT | P62855          | P62855          |
| 25.12928 | 24.94503 | 24.90885 | 25.61246  | 25.52552 | 25.53148 | 2.797556992 | 0.562100728 | Higher in EMT/6 RT | Q3UOV2          | Q3UOV2          |
| 27.5969  | 27.53148 | 27.68646 | 28.14589  | 28.15074 | 28.20769 | 3.481541563 | 0.563158671 | Higher in EMT/6 RT | A0A0R4J083;P511 | A0A0R4J083;P511 |
| 30.28692 | 30.44332 | 30.4334  | 30.98821  | 30.94698 | 30.91883 | 3.308576212 | 0.563458761 | Higher in EMT/6 RT | P16460          | P16460          |
| 28.4512  | 28.79266 | 28.34096 | 29.09648  | 29.07368 | 29.11644 | 1.847586924 | 0.567258199 | Higher in EMT/6 RT | P51863          | P51863          |
| 25.65949 | 25.38443 | 25.22435 | 26.15846  | 25.93157 | 25.8811  | 1.684604461 | 0.567622503 | Higher in EMT/6 RT | Q8BFL1;Q8BVQ0   | Q8BFL1          |
| 31.29242 | 31.09899 | 31.27586 | 31.64581  | 31.86452 | 31.86821 | 2.393553175 | 0.570425034 | Higher in EMT/6 RT | P99024;G3UZR1   | P99024          |
| 24.79452 | 24.90885 | 24.48001 | 25.23535  | 25.23169 | 25.42982 | 1.780712873 | 0.571163813 | Higher in EMT/6 RT | O09005          | O09005          |
| 27.63201 | 27.56819 | 27.51653 | 28.02433  | 28.09144 | 28.31527 | 2.430334401 | 0.571435928 | Higher in EMT/6 RT | P35550;A0A140L1 | P35550          |
| 27.43936 | 27.14102 | 27.50142 | 27.83846  | 28.04009 | 27.92025 | 1.983144384 | 0.572331746 | Higher in EMT/6 RT | Q9CPW4;Q3UA72   | Q9CPW4;Q3UA72   |
| 36.12809 | 36.19564 | 36.08124 | 36.69177  | 36.63882 | 36.79217 | 3.290670955 | 0.572594961 | Higher in EMT/6 RT | A0A087WR50;Q3L  | A0A087WR50;Q3L  |
| 30.82335 | 30.93298 | 30.69644 | 31.38278  | 31.39305 | 31.39816 | 2.954298805 | 0.573737462 | Higher in EMT/6 RT | P47738;A0A0G21E | P47738;A0A0G21E |
| 25.92705 | 25.77203 | 26.08835 | 26.56674  | 26.48616 | 26.39191 | 1.596486344 | 0.578810374 | Higher in EMT/6 RT | P61211;F8WB1E   | P61211;F8WB1E   |
| 28.05569 | 28.20769 | 27.94838 | 28.64924  | 28.59335 | 28.70636 | 3.347396365 | 0.579062144 | Higher in EMT/6 RT | Q99LCS          | Q99LCS          |
| 29.76762 | 29.33671 | 29.77077 | 30.13614  | 30.18423 | 30.91359 | 1.723863835 | 0.588286082 | Higher in EMT/6 RT | P62911;P17932   | P62911          |
| 27.45513 | 27.49381 | 27.2535  | 27.94838  | 27.93719 | 28.08639 | 2.577514907 | 0.589839935 | Higher in EMT/6 RT | Q9CQ11          | Q9CQ11          |
| 26.63201 | 26.5389  | 26.60399 | 26.87408  | 27.30661 | 27.3662  | 1.700233627 | 0.590662638 | Higher in EMT/6 RT | P57746          | P57746          |
| 29.96774 | 30.19601 | 30.09899 | 30.61982  | 30.71293 | 30.71293 | 2.905692086 | 0.594312032 | Higher in EMT/6 RT | P50516;D3Z1B9;D | P50516          |
| 24.58692 | 24.67573 | 24.51051 | 25.26785  | 25.06085 | 25.23169 | 1.766167559 | 0.595746358 | Higher in EMT/6 RT | P58021;E9P269   | P58021;E9P269   |
| 25.77706 | 25.89966 | 25.85757 | 26.57254  | NaN      | 26.31527 | 1.954068877 | 0.599142075 | Higher in EMT/6 RT | Q78XFS          | Q78XFS          |
| 27.53148 | 27.58978 | 27.53148 | 27.99226  | 28.04009 | 28.42342 | 1.189808172 | 0.601011912 | Higher in EMT/6 RT | Q9CQC7;A0A0G2   | Q9CQC7          |
| 25.89504 | 25.85519 | 26.21512 | 26.52701  | 26.54922 | 26.69975 | 2.057758939 | 0.603542328 | Higher in EMT/6 RT | Q6GQ79          | Q6GQ79          |
| 30.48232 | 30.68813 | 30.48232 | 31.16639  | 31.18423 | 31.12886 | 2.991136501 | 0.607241948 | Higher in EMT/6 RT | Q31FD0;Q9CZM7   | Q31FD0;Q9CZM7   |
| 28.37865 | 28.52776 | 28.06085 | 29.02433  | 29.00571 | 29.61219 | 1.704165061 | 0.608022054 | Higher in EMT/6 RT | Q3V3R1          | Q3V3R1          |
| 25.239   | 25.53148 | 25.42982 | 26.14686  | 25.92025 | 25.96279 | 2.280480249 | 0.609867732 | Higher in EMT/6 RT | F8WHF8;P56135   | F8WHF8;P56135   |
| 26.35111 | 26.06907 | 26.2535  | 26.88577  | 26.58978 | 27.0296  | 1.62900815  | 0.610490163 | Higher in EMT/6 RT | Q8R5L1;Q35658   | Q8R5L1;Q35658   |
| 27.14102 | 27.39917 | 27.11148 | 27.74535  | 27.83846 | 27.90311 | 2.40704768  | 0.611749649 | Higher in EMT/6 RT | Q8C2C8;Q91VR2;  | Q8C2C8;Q91VR2;  |
| 26.09346 | 26.1776  | 25.85043 | 26.52701  | 26.67303 | 26.76446 | 2.161755947 | 0.614339828 | Higher in EMT/6 RT | Q9D2G2          | Q9D2G2          |
| 28.31095 | 28.34096 | 28.11148 | 28.76129  | 29.00303 | 28.87408 | 2.471044835 | 0.625006994 | Higher in EMT/6 RT | Q99N15;A2AFQ2;  | Q99N15;A2AFQ2;C |
| 27.38278 | 27.391   | 27.09144 | 27.95947  | 27.95394 | 27.90885 | 2.54800563  | 0.652345657 | Higher in EMT/6 RT | Q8B8M4          | Q8B8M4          |
| 23.81909 | 24.20955 | 23.92252 | 24.55215  | 24.59263 | 24.78457 | 2.066793399 | 0.659395218 | Higher in EMT/6 RT | Q9CZW5          | Q9CZW5          |
| 25.98685 | 25.7103  | 25.87643 | 26.44253  | 26.53594 | 26.58978 | 1.766216536 | 0.664889018 | Higher in EMT/6 RT | Q54984;A0A1B0G  | Q54984          |
| 28.08639 | 28.21697 | 28.13614 | 28.88577  | 28.76129 | 28.79576 | 3.636538051 | 0.667772293 | Higher in EMT/6 RT | A0A111ST6E;Q9D  | A0A111ST6E;Q9D  |
| 25.52253 | 25.83605 | 26.21697 | 26.32903  | 26.61807 | 26.63201 | 1.3920395   | 0.66785113  | Higher in EMT/6 RT | O08797          | O08797          |
| 25.76446 | 25.61246 | 25.52253 | 26.29439  | 26.56092 | 26.05258 | 1.831680628 | 0.669485092 | Higher in EMT/6 RT | E9QMK9;Q8B86    | E9QMK9;Q8B86    |
| 29.61456 | 29.34096 | 29.63893 | 30.16039  | 30.23078 | 30.21928 | 2.625898178 | 0.671997706 | Higher in EMT/6 RT | Q6ZWV7;Q9CP4;   | Q6ZWV7;Q9CP4    |
| 31.15559 | 31.44825 | 31.44332 | 32.14224  | 32.13919 | 32.15738 | 5.028986854 | 0.677215576 | Higher in EMT/6 RT | Q03265;D3Z6F5;  | Q03265;D3Z6F5   |
| 30.47267 | 30.58441 | 30.62854 | 31.20769  | 31.28692 | 31.24218 | 3.722270527 | 0.683726629 | Higher in EMT/6 RT | P05202          | P05202          |
| 24.83846 | 24.83846 | 24.76446 | 25.47692  | 25.48616 | 25.53445 | 4.676647999 | 0.686990102 | Higher in EMT/6 RT | P48771          | P48771          |
| 23.35111 | 23.01563 | 23.29614 | 23.57542  | 24.00196 | 24.16423 | 1.562741631 | 0.692910512 | Higher in EMT/6 RT | Q9DBL7          | Q9DBL7          |
| 31.48712 | 31.55728 | 31.57091 | 32.13919  | 32.26472 | 32.29242 | 3.680056086 | 0.693677266 | Higher in EMT/6 RT | P56480          | P56480          |
| 31.80809 | 31.84969 | 31.84221 | 32.48712  | 32.50142 | 32.59557 | 4.355034047 | 0.694709142 | Higher in EMT/6 RT | P63038;D3Z2F2;D | P63038          |
| 26.17188 | 26.63201 | 26.06497 | 27.09144  | 26.9428  | 26.92025 | 1.725860316 | 0.695210775 | Higher in EMT/6 RT | P97450;Q35658   | P97450          |
| 31.18423 | 31.34096 | 31.16639 | 31.93649  | 31.92592 | 31.91528 | 1.662790242 | 0.695339627 | Higher in EMT/6 RT | P48962;Q3V132   | P48962          |
| NaN      | 24.44435 | 24.52253 | 25.15267  | 25.31354 | 24.92252 | 3.642331763 | 0.696139336 | Higher in EMT/6 RT | Q6PD26          | Q6PD26          |
| 25.89735 | 25.89041 | 25.99981 | 27.01903  | 26.24082 | 26.61807 | 1.425588285 | 0.696781794 | Higher in EMT/6 RT | P50637;A0A140L1 | P50637          |
| 26.36453 | 26.317   | 25.87408 | 27.21697  | 26.72598 | 26.71293 | 1.429620395 | 0.700091044 | Higher in EMT/6 RT | Q8C3X8          | Q8C3X8          |
| 30.07368 | 30.28692 | 30.06085 | 30.82335  | 30.89735 | 30.81574 | 1.296233161 | 0.704998652 | Higher in EMT/6 RT | Q9CZU6;Q80X6    | Q9CZU6          |
| 29.18896 | 29.26919 | 29.21697 | 29.96774  | 29.91171 | 29.91171 | 4.710677732 | 0.705347697 | Higher in EMT/6 RT | P26443;7FCA5    | P26443          |
| 28.52776 | 28.75409 | 28.40324 | 29.22489  | 29.39991 | 29.34038 | 2.535933267 | 0.708511353 | Higher in EMT/6 RT | P51881          | P51881          |
| 26.85043 | 26.57109 | 26.93157 | 27.34096  | 27.61807 | 27.53148 | 2.129283422 | 0.712472916 | Higher in EMT/6 RT | P35486          | P35486          |
| 24.77455 | 24.58019 | 24.34435 | 25.16806  | 25.33074 | 25.317   | 2.213878015 | 0.712964376 | Higher in EMT/6 RT | Q8C9V5;Q8BGK0;  | Q8C9V5;Q8BGK0;  |
| 25.56384 | 25.7024  | 25.69975 | 26.28912  | 26.38113 | 26.44253 | 3.441813702 | 0.715597153 | Higher in EMT/6 RT | O03930          | O03930          |
| 28.74855 | 28.93152 | 28.83244 | 29.60222  | 29.53148 | 29.52962 | 3.607540187 | 0.716923396 | Higher in EMT/6 RT | O08749          | O08749          |
| 25.77957 | 26.35783 | 26.33566 | 26.77706  | 27.05051 | 26.82639 | 1.60797637  | 0.726898829 | Higher in EMT/6 RT | A0A0A0M0A5;P6E  | A0A0A0M0A5;P6E  |
| 24.89504 | 24.91798 | 24.96279 | 25.46139  | 25.90656 | 25.59548 | 2.624472395 | 0.729206085 | Higher in EMT/6 RT | P17665          | P17665          |
| 28.55728 | 28.58978 | 28.48999 | 29.32174  | 29.27586 | 29.22849 | 4.281162518 | 0.729679108 | Higher in EMT/6 RT | P29758          | P29758          |
| 29.13124 | 29.04009 | 29.10649 | 29.80039  | 29.77392 | 29.89735 | 0.255604025 | 0.731277466 | Higher in EMT/6 RT | Q35129;F6QPR1F  | Q35129;F6QPR1F  |
| 24.65403 | 25.27142 | 24.71293 | 25.78955  | 25.6811  | 25.39754 | 1.502750915 | 0.743270874 | Higher in EMT/6 RT | A0A0N4S;Q1;Q62  | A0A0N4S;Q1;Q62  |
| 24.26069 | NaN      | 23.80931 | 24.70767  | 24.67034 | 24.95837 | 1.444521164 | 0.743789355 | Higher in EMT/6 RT | Q6PGL7;A0A0N4S  | Q6PGL7;A0A0N4S  |
| 25.92931 | 26.07928 | 25.68913 | 26.87408  | 26.66007 | 26.58978 | 1.961291715 | 0.744070053 | Higher in EMT/6 RT | P61804          | P61804          |
| 24.33756 | 24.79947 | 24.417   | 24.90885  | 25.64031 | 25.239   | 1.363951983 | 0.744710286 | Higher in EMT/6 RT | Q8R111          | Q8R111          |
| 28.46295 | 28.258   | 28.49381 | 29.11644  | 29.08132 | 29.258   | 2.909748576 | 0.746999741 | Higher in EMT/6 RT | Q9DB20;F6XVM5;  | Q9DB20          |
| 30.19601 | 30.33031 | 30.36202 | 31.00169  | 31.0544  | 31.0927  | 3.173638203 | 0.753481547 | Higher in EMT/6 RT | Q64433          | Q64433          |
| 27.2803  | 27.35783 | 27.39917 | 28.11148  | 28.07623 | 28.11644 | 4.4658218   | 0.755614599 | Higher in EMT/6 RT | G3X9L6;Q9DCX2;  | G3X9L6;Q9DCX2;B |
| 27.41538 | 27.38278 | 27.18896 | 28.11644  | 28.06599 | 28.07623 | 3.32736543  | 0.757181168 | Higher in EMT/6 RT | Q99L6P          | Q99L6P          |
| 25.2856  | 25.38113 | 25.2021  | 26.13712  | 26.07928 | 25.9394  | 3.292398781 | 0.767170588 | Higher in EMT/6 RT | Q9Z1G3          | Q9Z1G3          |
| 30.62854 | 30.59335 | 30.46295 | 31.2814   | 31.34625 | 31.37244 | 3.758695449 | 0.771753947 | Higher in EMT/6 RT | Q9QZ2F          | Q9QZ2F          |
| 24.55215 | 24.98033 | 24.49838 | 25.6971</ |          |          |             |             |                    |                 |                 |

|          |          |          |          |          |          |             |             |                    |                 |                 |
|----------|----------|----------|----------|----------|----------|-------------|-------------|--------------------|-----------------|-----------------|
| NaN      | 24.65403 | 24.86703 | 25.48308 | 25.98251 | 25.76446 | 1.775597059 | 0.98281765  | Higher in EMT/6 RT | O88696          | O88696          |
| 24.97596 | 24.57542 | 25.08132 | 25.76446 | 25.65403 | 26.20396 | 1.922683293 | 0.996583939 | Higher in EMT/6 RT | Q9QXX4          | Q9QXX4          |
| 30.09899 | 30.17236 | 30.14831 | 31.0927  | 31.19013 | 31.15436 | 5.023851988 | 1.005846024 | Higher in EMT/6 RT | Q99JR5;H3BJ97;H | Q99JR5;H3BJ97   |
| 25.74919 | 25.78207 | 26.23717 | 27.22619 | 26.75175 | 26.85043 | 2.054166853 | 1.01997757  | Higher in EMT/6 RT | Q8R2Y8          | Q8R2Y8          |
| 23.88577 | 24.26785 | 23.42982 | 25.04009 | 25.21697 | 24.39754 | 1.375857128 | 1.023722967 | Higher in EMT/6 RT | Q8DCAS;F6WEP7   | Q8DCAS;F6WEP7   |
| 25.13712 | 25.08942 | 24.50446 | 26.11545 | 25.92705 | 25.76192 | 1.9660559   | 1.024478277 | Higher in EMT/6 RT | Q9DC61;A2AIW9   | Q9DC61;A2AIW9   |
| 26.37782 | 26.86231 | 26.56092 | 27.55362 | 27.74535 | 27.61807 | 2.619338814 | 1.038661321 | Higher in EMT/6 RT | Q9CZ13;A0A0A6Y  | Q9CZ13          |
| 25.47692 | 26.09748 | 25.4073  | 26.49228 | 26.60399 | 27.0296  | 1.729665848 | 1.048058192 | Higher in EMT/6 RT | H3BKN0;Q1HFZ0   | H3BKN0;Q1HFZ0   |
| 23.56384 | 24.42982 | NaN      | 25.08537 | 24.99335 | 25.07725 | 1.32243386  | 1.055160522 | Higher in EMT/6 RT | A0A0R3P9C8;Q9D  | A0A0R3P9C8;Q9D  |
| 26.60399 | 25.90196 | 26.80193 | 27.60399 | 27.42342 | 27.47073 | 1.726524251 | 1.06341807  | Higher in EMT/6 RT | Q8CFE6          | Q8CFE6          |
| 23.97596 | 24.03591 | 24.1488  | 25.12534 | 25.02327 | 25.20583 | 3.886201747 | 1.064589183 | Higher in EMT/6 RT | A0A087WSN6;B9E  | A0A087WSN6;B9E  |
| 24.98902 | 25.20583 | 25.57542 | 26.42502 | 26.14492 | 26.4008  | 2.279492986 | 1.066823324 | Higher in EMT/6 RT | Q9CPQ8          | Q9CPQ8          |
| 24.96719 | 24.82396 | 24.35783 | 26.1488  | 26.04635 | 25.15653 | 1.366730784 | 1.06756719  | Higher in EMT/6 RT | Q9CR60          | Q9CR60          |
| 25.46139 | 26.17188 | 25.46139 | 26.85043 | 26.18707 | 27.27142 | 1.273694637 | 1.071419398 | Higher in EMT/6 RT | Q62086          | Q62086          |
| 23.11744 | 22.42214 | NaN      | 23.59833 | 23.70767 | 24.24627 | 1.222774309 | 1.080967585 | Higher in EMT/6 RT | Q6NS46          | Q6NS46          |
| 25.04009 | 25.1946  | 25.36786 | 26.50446 | 25.97378 | 26.38278 | 2.364892644 | 1.086151123 | Higher in EMT/6 RT | Q8BGH2          | Q8BGH2          |
| 26.14686 | 26.63201 | 26.48001 | 27.4073  | 27.5389  | 27.57542 | 2.693872825 | 1.087584813 | Higher in EMT/6 RT | Q6PB66          | Q6PB66          |
| 25.72858 | 25.30661 | 25.73117 | 26.56529 | 26.48462 | 27.07112 | 2.072656488 | 1.118221919 | Higher in EMT/6 RT | P19783;MOQWX7   | P19783          |
| 25.82881 | 25.35448 | 26.40568 | 27.09144 | 26.9428  | 26.95394 | 1.674614125 | 1.133069356 | Higher in EMT/6 RT | P12787          | P12787          |
| 25.05258 | 25.38113 | 24.47383 | 26.03591 | 26.24627 | 26.05051 | 1.853141206 | 1.14171346  | Higher in EMT/6 RT | Q92116;Q60598   | Q92116;Q60598   |
| 28.87408 | 28.69975 | 28.78955 | 29.92592 | 29.91171 | 29.99496 | 4.472373206 | 1.156403859 | Higher in EMT/6 RT | E9Q5G3;A0A111S  | E9Q5G3;A0A111S  |
| 25.58405 | 25.43619 | 25.79699 | 26.13124 | 26.98685 | 27.16997 | 1.578154533 | 1.156942368 | Higher in EMT/6 RT | Q9DC53;Q9CYR4   | Q9DC53          |
| 24.49838 | 24.65403 | 24.71293 | 25.76446 | 25.66492 | 25.91342 | 3.560342003 | 1.159151713 | Higher in EMT/6 RT | O35988          | O35988          |
| 27.66628 | 27.67303 | 27.90885 | 28.92875 | 29.0427  | 28.88867 | 3.703335334 | 1.203986486 | Higher in EMT/6 RT | Q9VWM1;E9Q9N9   | Q9VWM1          |
| 23.04427 | 23.32389 | 24.61526 | 24.67034 | 25.00624 | 25.05672 | 1.178179265 | 1.249961217 | Higher in EMT/6 RT | P10404;P11370;B | P10404          |
| 23.93157 | NaN      | 24.17188 | 25.33415 | 25.54038 | 25.04009 | 2.03958097  | 1.253149668 | Higher in EMT/6 RT | O88958;D3Z0R5;D | O88958;D3Z0R5   |
| 25.04009 | 24.62645 | 25.19084 | 26.20583 | 26.30487 | 26.16997 | 2.738036211 | 1.274429321 | Higher in EMT/6 RT | Q64133          | Q64133          |
| 25.52552 | 25.24627 | 25.2571  | 26.90885 | 26.57109 | 26.64581 | 3.242003561 | 1.365622838 | Higher in EMT/6 RT | Q9D0M3          | Q9D0M3          |
| 25.76446 | 24.40406 | 25.60682 | 26.35111 | 26.82639 | 26.81421 | 1.43006845  | 1.405456543 | Higher in EMT/6 RT | Q9D881;P19536;F | Q9D881;P19536   |
| 22.2006  | 21.64966 | 21.70978 | 23.50446 | 22.66275 | 23.63201 | 1.803420463 | 1.413060506 | Higher in EMT/6 RT | E9Q411          | E9Q411          |
| 23.70767 | 24.39754 | 23.82881 | 25.48922 | 25.50142 | 25.41377 | 2.647364465 | 1.490131378 | Higher in EMT/6 RT | E9Q3T3;L0N7N1;F | E9Q3T3;L0N7N1   |
| 28.18896 | 27.41538 | 27.16997 | 29.18423 | 29.13614 | 29.23991 | 2.17739265  | 1.595322291 | Higher in EMT/6 RT | E9Q600;Q924C6;E | E9Q600;Q924C6   |
| 24.59263 | 24.64306 | 24.84326 | 26.76446 | 26.1946  | 25.90656 | 2.42589401  | 1.595553716 | Higher in EMT/6 RT | D3Z7P3;D3Z7P4;F | D3Z7P3;D3Z7P4   |
| 25.78457 | 24.89041 | 25.99118 | 26.99766 | 27.16997 | 27.28912 | 1.993964218 | 1.596862793 | Higher in EMT/6 RT | Q9CQV6;MOQWC    | Q9CQV6;MOQWC    |
| 24.54628 | 23.77957 | 24.35783 | 25.71293 | 25.93607 | 26.26249 | 2.466515884 | 1.74260203  | Higher in EMT/6 RT | P99028          | P99028          |
| 26.24082 | 24.57542 | 24.32389 | 26.82639 | 26.99766 | 26.64581 | 1.360847577 | 1.77657636  | Higher in EMT/6 RT | Q9QYA2;G3UY77   | Q9QYA2          |
| 28.51653 | 28.69644 | 28.40324 | 30.30878 | 30.45317 | 30.18423 | 3.983051305 | 1.776655833 | Higher in EMT/6 RT | Q64337;D3YZ1;F  | Q64337;D3YZ1    |
| 23.06579 | NaN      | 22.17035 | 25.22803 | 24.26069 | 23.96719 | 1.28748164  | 1.867230733 | Higher in EMT/6 RT | A0A0F6AIX5;A0A1 | A0A0F6AIX5;A0A1 |
| 23.29614 | 22.26499 | 24.47383 | 25.50749 | 25.26069 | 25.62645 | 1.513985594 | 2.119889577 | Higher in EMT/6 RT | Q9CXF4          | Q9CXF4          |
| 24.6971  | 23.33756 | 24.1332  | 26.44095 | 26.4567  | 26.239   | 2.356925379 | 2.322925568 | Higher in EMT/6 RT | P52293;A2A600;A | P52293          |
| 21.85377 | NaN      | 21.21252 | 24.5285  | 23.391   | 23.87643 | 1.792560608 | 2.398832003 | Higher in EMT/6 RT | Q8VDU3;Q8C714   | Q8VDU3;Q8C714   |

| Protein names                                                           | Gene names  | GOBP name                                                                                                     | GOMF name                                                                    | GOCC name                                                                                      | KEGG name                                                                                  |
|-------------------------------------------------------------------------|-------------|---------------------------------------------------------------------------------------------------------------|------------------------------------------------------------------------------|------------------------------------------------------------------------------------------------|--------------------------------------------------------------------------------------------|
| Pigment epithelium-deriv                                                | Serpinf1    | biological regulation;negative regulation of angiogenesis                                                     | endopeptidase inhibitor activity;endopeptidase inhibitor activity            | cell part,cytoplasmic membrane-bounded vesicle                                                 | Complement and coagulation cascades;Staphylococcus aureus                                  |
| Protein prune homolog 2                                                 | Prune2      | apoptosis;cell death;cellular process;death;programmed cell death                                             | catalytic activity;hydrolase activity;hydrolase activity                     | cell part,cytoplasmic part;Golgi apparatus;intracellular region                                |                                                                                            |
| Arrestin domain-containing protein 1                                    | Arrdc1      | activation of immune response;biological regulation                                                           | binding;calcium ion binding;catalytic activity;catalytic activity            | extracellular region                                                                           | Complement and coagulation cascades;Staphylococcus aureus                                  |
| Calcium-binding and coiled-coil domain-containing protein 1             | Calcoc1     | biological regulation;biosynthetic process;cellular process                                                   | binding;chromatin binding;DNA binding;ligand-binding                         | cell part;chromatin;chromosomal part;cytoplasmic part                                          |                                                                                            |
| Telomerase protein component 1                                          | Tep1        | anatomical structure homeostasis;biological regulation                                                        | adenyl nucleotide binding;adenyl ribonucleotide binding                      | cell part;chromosomal part;chromosome, telomere                                                |                                                                                            |
| Extracellular superoxide dismutase 2                                    | Sod3        | cellular metabolic process;cellular process;cellular process                                                  | antioxidant activity;binding;catalytic activity;catalytic activity           | cell part,cytoplasmic part;cytosol;extracellular region                                        |                                                                                            |
| Protein tweety homolog 3                                                | Ttyh3       |                                                                                                               | anion channel activity;anion transmembrane transport                         | cell part;chloride channel complex;ion channel                                                 |                                                                                            |
| Glutathione peroxidase 4                                                | Gpx4        | cellular component organization;cellular component organization                                               | antioxidant activity;catalytic activity;glutathione peroxidase activity      | cell part,cytoplasmic part;cytosol;envelope;intracellular region                               | Glutathione metabolism                                                                     |
| Leucine-rich repeat flightless domain-containing protein 1              | Lrrfp1      | biological regulation;biosynthetic process;cellular process                                                   | binding;DNA binding;nucleic acid binding                                     | cell part,cytoplasm;intracellular membrane-bounded organelle                                   |                                                                                            |
| Biliverdin reductase A                                                  | Bilra       | catabolic process;cellular catabolic process;cellular process                                                 | biliverdin reductase activity;binding;catalytic activity                     | cell part,cytoplasm;intracellular part                                                         | Porphyrin and chlorophyll metabolism                                                       |
| Gasdermin-D                                                             | Gsdmcd1     | cell communication;cellular process;cellular process                                                          |                                                                              |                                                                                                |                                                                                            |
| Complement factor H                                                     | Cfh         | activation of immune response;biological regulation                                                           | binding;carbohydrate binding;glycosaminoglycan binding                       | extracellular region                                                                           | Complement and coagulation cascades;Staphylococcus aureus                                  |
| Carbonic anhydrase 9                                                    | Car9        | anatomical structure morphogenesis;cellular morphogenesis                                                     | binding;carbonate dehydratase activity;carbonate dehydratase activity        | cell part;cell projection membrane;cell projection membrane                                    | Nitrogen metabolism                                                                        |
| Fractalkine                                                             | Cx3cl1      | anatomical structure formation involved in morphogenesis                                                      | binding;chemokine activity;chemokine receptor activity                       | cell part;cell surface;extracellular region;extracellular matrix                               | Chemokine signaling pathway;Cytokine-cytokine receptor interaction                         |
| Immunoglobulin superfamily member 8                                     | Igfb8       | apoptosis;cell death;cellular process;death;programmed cell death                                             | binding;carbohydrate binding                                                 | cell part;cytoplasm;extracellular region;intracellular region                                  |                                                                                            |
| Galectin-7                                                              | Galect7     | 8 cell homeostasis;biological regulation;homeostasis                                                          | adenyl nucleotide binding;adenyl ribonucleotide binding                      | cell part;cytoplasm;extracellular region;intracellular region                                  | Acute myeloid leukemia;Adipocytokine signaling                                             |
| Inhibitor of nuclear factor-kappa-B                                     | Ikbkb       | anatomical structure formation involved in morphogenesis                                                      | binding;identical protein binding;protein binding                            | axon;cell part;cell projection;cytoplasm;cytoplasmic part                                      |                                                                                            |
| Teneurin-4                                                              | Tenn4       | adipose tissue development;adrenal gland development                                                          | 5'-deoxyribose-5-phosphate lyase activity;ATP-dependent                      | cell part;chromatin;chromosomal part;chromosome                                                |                                                                                            |
| High mobility group protein 2                                           | Hmg2        | biological regulation;blood coagulation;coagulation                                                           | binding;carbohydrate binding;endopeptidase inhibitor activity                | extracellular region;extracellular region part;extracellular matrix                            | Complement and coagulation cascades                                                        |
| Antithrombin-III                                                        | Serpinc1    | binding of sperm to zona pellucida;cell differentiation                                                       | binding;DNA binding;nucleic acid binding                                     | cell part;chromatin;chromosomal part;chromosome                                                |                                                                                            |
| Histone H1.3                                                            | Hist1h1d    | amine metabolic process;biosynthetic process;cellular process                                                 | adenyl nucleotide binding;adenyl ribonucleotide binding                      | cell part,cytoplasm;intracellular part                                                         | Purine metabolism                                                                          |
| Phosphoribosylformylglycine amidotransferase 1                          | Pfas        | biological adhesion;biological regulation;cell adhesion                                                       | binding;extracellular matrix constituent conferring biological adhesion      | collagen;extracellular matrix;extracellular matrix                                             |                                                                                            |
| EMILIN-1                                                                | Emilin1     | cellular component assembly;cellular component assembly                                                       | binding;DNA binding;nucleic acid binding                                     | cell part;chromatin;chromosomal part;intracellular region                                      |                                                                                            |
| Histone H1.1                                                            | Hist1h1a    | activation of protein kinase activity;adaptive immunity                                                       | binding;carbohydrate binding;chemoattractant activity                        | basement membrane;cell part;cell surface;cytoplasm                                             | Bladder cancer;Cytokine-cytokine receptor interaction                                      |
| Vascular endothelial growth factor 3                                    | Vegfa       | adenyl nucleotide binding;adenyl ribonucleotide binding                                                       | adenyl nucleotide binding;adenyl ribonucleotide binding                      | cell part,cytoplasmic part;endosome;intracellular region                                       | Regulation of autophagy                                                                    |
| Phosphoinositide 3-kinase                                               | Pik3r4      | biological regulation;negative regulation of biological process                                               |                                                                              | cell part;intracellular membrane-bounded organelle                                             |                                                                                            |
| Putative RNA-binding protein 7                                          | Luc7l2      | anatomical structure development;anatomical structure development                                             | binding;calcium ion binding;cation binding;ion binding                       | extracellular matrix;extracellular region;extracellular matrix                                 |                                                                                            |
| Twisted gastrulation protein                                            | Twsg1       | anatomical structure development;biological regulation                                                        | binding;DNA binding;nucleic acid binding                                     | cell part;chromatin;chromosomal part;cytoplasmic part                                          |                                                                                            |
| Matrix Gla protein                                                      | Mgp         | cellular component assembly;cellular component assembly                                                       | binding;DNA binding;nucleic acid binding                                     | collagen;extracellular matrix part;extracellular matrix                                        |                                                                                            |
| Histone H1.0                                                            | H1f0        | biological adhesion;cell adhesion;cellular process                                                            |                                                                              | cell part,integral to membrane;intrinsic to membrane                                           |                                                                                            |
| EMILIN-2                                                                | Emilin2     | biological adhesion;cell adhesion;cellular component organization                                             | binding;DNA binding;nucleic acid binding                                     | cell part;collagen;extracellular matrix;extracellular matrix                                   | ECM-receptor interaction;Focal adhesion;Protein tyrosine phosphorylation signaling pathway |
| Tetraspanin-14                                                          | Tspan14     | biological adhesion;cell adhesion;cellular component organization                                             | binding;DNA binding;hormone receptor binding                                 | cell part;chromatin;chromosomal part;heterochromatin                                           |                                                                                            |
| Collagen alpha-1(V) chain                                               | Col6a1      | biological regulation;chemotaxis;defense response                                                             | binding;carbohydrate binding;catalytic activity;catalytic activity           | basement membrane;cell part;cytoplasmic part                                                   | Chemokine signaling pathway;Cytokine-cytokine receptor interaction                         |
| High mobility group protein 1                                           | Hmg1a       | anatomical structure development;anatomical structure development                                             | binding;actin cytoskeleton organization;actin filament-binding               | cell part,cytoplasm;cytoskeleton;intracellular region                                          | Regulation of actin cytoskeleton                                                           |
| C-X-C motif chemokine 5                                                 | Cxcl5       | cellular component assembly;cellular component assembly                                                       | binding;DNA binding;nucleic acid binding                                     | cell part;chromosomal part;intracellular membrane                                              |                                                                                            |
| A disintegrin and metalloproteinase with thrombospondin type 1 motifs 1 | Adamts1     | cellular component assembly;cellular component assembly                                                       | binding;peptide binding;structural molecule activity                         | cell part;chromosome;cytoplasm;intracellular matrix                                            |                                                                                            |
| Protein BRICK1                                                          | Birk1       | cellular component assembly;cellular component assembly                                                       | binding;DNA binding;nucleic acid binding                                     | cell part;chromosomal part;intracellular membrane                                              |                                                                                            |
| Histone H1.4                                                            | Hist1h1e    | cellular component assembly;cellular component assembly                                                       | binding;DNA binding;nucleic acid binding                                     | cell part;chromosomal part;intracellular membrane                                              |                                                                                            |
| Clathrin light chain                                                    | Cltc        | cellular component assembly;cellular component assembly                                                       | binding;DNA binding;nucleic acid binding                                     | cell part;chromosomal part;intracellular membrane                                              | Bacterial invasion of epithelial cells;Endocrine and reproductive system                   |
| Barrier-to-autointegration factor 1                                     | Banf1       | cellular component assembly;cellular component assembly                                                       | binding;DNA binding;nucleic acid binding                                     | axon;cell part;cell projection;cytoplasmic part;intracellular matrix                           | Carbon fixation in photosynthetic organisms;Fructose-bisphosphate aldolase activity        |
| Fructose-bisphosphate aldolase                                          | Aldoc       | aging;alcohol catabolic process;alcohol metabolism                                                            | aldehyde-lyase activity;carbon-carbon lyase activity                         | extracellular matrix;extracellular region part;extracellular matrix                            |                                                                                            |
| Mimectin                                                                | Ogn         | cellular macromolecule metabolic process;cellular macromolecule metabolic process                             | binding;DNA binding;nucleic acid binding;nucleic acid binding                | cell part,cytoplasm;intracellular membrane-bounded organelle                                   | mRNA surveillance pathway;RNA transport;Splicing                                           |
| Aly/REF export factor 2                                                 | Alyref2     | anatomical structure development;blood vessel morphogenesis                                                   | binding;catalytic activity;cation binding;copper ion binding                 | cell part;collagen;extracellular matrix part;extracellular matrix                              |                                                                                            |
| Protein-lysine 6-oxidase                                                | Lox         | anatomical structure development;cellular component assembly                                                  | binding;DNA binding;nucleic acid binding                                     | cell part;chromosomal part;intracellular membrane                                              |                                                                                            |
| Histone H1.5                                                            | Hist1h1b    | cellular component assembly;cellular component assembly                                                       | binding;DNA binding;nucleic acid binding                                     | cell part;chromosomal part;intracellular membrane                                              |                                                                                            |
| Histone H1.2                                                            | Hist1h1c    | cellular component assembly;cellular component assembly                                                       | binding;DNA binding;nucleic acid binding                                     | cell part;chromosomal part;intracellular membrane                                              |                                                                                            |
| SLIT-ROBO Rho GTPase-activated protein 2                                | Srgap2      | actin filament severing;actin filament-based process                                                          | binding;enzyme activator activity;enzyme binding                             | cell junction;cell part;cell projection;cytoplasmic part                                       | Axon guidance                                                                              |
| Retinol-binding protein 1                                               | Rbp1        | biological regulation;biosynthetic process;carbohydrate metabolic process                                     | binding;isoprenoid binding;lipid binding;retinal binding                     | cell body;cell part,cytoplasmic part;cytosol;intracellular region                              |                                                                                            |
| Histone H2A;Histone H2A                                                 | H2afj       | cellular component assembly;cellular component assembly                                                       | binding;DNA binding;nucleic acid binding                                     | cell part;chromosomal part;intracellular membrane                                              | Systemic lupus erythematosus                                                               |
| Major vault protein                                                     | Mvp         | cell proliferation;macromolecule metabolic process                                                            | binding;DNA binding;nucleic acid binding                                     | cell part,cytoplasm;extracellular membrane-bounded organelle                                   |                                                                                            |
| Histone H2A type 2-C                                                    | Hist2h2ac   | cellular component assembly;cellular component assembly                                                       | binding;DNA binding;nucleic acid binding                                     | cell part;chromosomal part;intracellular membrane                                              | Systemic lupus erythematosus                                                               |
| Transcriptional activator 7                                             | Purb        | apoptosis;biological regulation;biosynthetic process                                                          | binding;DNA binding;double-stranded DNA binding                              | cell part;chromosomal part;DNA replication factor                                              |                                                                                            |
| Protein transport protein 1                                             | Sec16a      | cellular component organization;cellular component organization                                               |                                                                              | cell part,cytoplasmic part;cytosol;intracellular part                                          |                                                                                            |
| Enhancer of rudimentary headless                                        | Erh         | cell cycle;cellular process                                                                                   |                                                                              |                                                                                                |                                                                                            |
| Vacuolar protein sorting-associated protein 37c                         | Vps37c      | establishment of localization;establishment of protein localization                                           | binding;DNA binding;nucleic acid binding                                     | cell part,cytoplasmic part;endosomal part;endosome                                             | Endocytosis                                                                                |
| Histone H3.1                                                            | Hist1h3a    | biological regulation;cellular component assembly                                                             | binding;DNA binding;nucleic acid binding                                     | cell part;chromosomal part;intracellular membrane                                              | Systemic lupus erythematosus                                                               |
| Histone H2A,V;Histone H2A                                               | H2afv;H2afz | cellular component assembly;cellular component assembly                                                       | binding;DNA binding;nucleic acid binding                                     | cell part;chromosomal part;intracellular membrane                                              | Systemic lupus erythematosus                                                               |
| Biglycan                                                                | Bgn         | amine metabolic process;aminoglycan metabolism                                                                | binding;carbohydrate binding;extracellular matrix binding                    | cell part;cell surface;cytoplasmic membrane-bounded organelle                                  |                                                                                            |
| EGF-like repeat and disordered domain-containing protein 1              | Edil3       | biological adhesion;biological regulation;cell adhesion                                                       | binding;calcium ion binding;cation binding;ion binding                       | extracellular membrane-bounded organelle;extracellular matrix                                  |                                                                                            |
| Calsyntenin-1                                                           | Cstn1       | biological adhesion;biological regulation;calcium ion binding                                                 | binding;calcium ion binding;cation binding;ion binding                       | cell junction;cell part;cell projection;cytoplasmic part                                       |                                                                                            |
| Vacuolar protein sorting-associated protein 37b                         | Vps37b      | establishment of localization;establishment of protein localization                                           | binding;mRNA binding;nucleic acid binding;nucleic acid binding               | cell part,cytoplasmic part;endosomal part;endosome                                             | Endocytosis                                                                                |
| Transformer-2 protein homolog                                           | Tra2b       | biological regulation;cellular macromolecule metabolic process                                                | binding;DNA binding;nucleic acid binding;nucleic acid binding                | cell part;intracellular membrane-bounded organelle                                             | Spliceosome                                                                                |
| Glycerophosphoinositol 3-kinase                                         | Gdpd2       | alcohol metabolic process;alditol metabolic process                                                           | binding;catalytic activity;cation binding;glycerol kinase activity           | cell part,cytoplasm;cytoskeleton;integral to membrane                                          |                                                                                            |
| C-X-C motif chemokine 3                                                 | Cxcl3       | biological regulation;calcium ion homeostasis;cellular process                                                | binding;chemokine activity;chemokine receptor activity                       | extracellular region part;extracellular space                                                  |                                                                                            |
| Wiskott-Aldrich syndrome protein                                        | Wasf2       | actin cytoskeleton organization;actin filament-based process                                                  | binding;actin cytoskeleton organization;actin filament-binding               | cell part;cell projection;cytoplasmic part;cytoskeleton                                        | Adherens junction;Bacterial invasion of epithelial cells                                   |
| Pre-mRNA-processing factor 19                                           | Pprip19     | biological regulation;biosynthetic process;cellular process                                                   | acid-amino acid ligase activity;binding;catalytic activity                   | cell part,cytoplasmic part;cytoskeletal part;intracellular region                              | Spliceosome;Ubiquitin mediated proteolysis                                                 |
| Insulin-like growth factor 1                                            | Igf1bp7     | anatomical structure development;biological adhesion                                                          |                                                                              | extracellular matrix;extracellular region;extracellular matrix                                 |                                                                                            |
| Protein FAM177A1                                                        | Fam177a1    | anatomical structure development;anatomical structure development                                             | binding;catalytic activity;cation binding;endopeptidase activity             | cell part,cytoplasmic membrane-bounded vesicle                                                 | Lysosome                                                                                   |
| Tripeptidyl-peptidase 1                                                 | Tpp1        | anatomical structure development;base excision-repair                                                         | binding;chemoattractant activity;damaged DNA binding                         | cell part;chromosome;condensed chromosome;beta-catenin destruction complex;cell body;cell part | Wnt signaling pathway                                                                      |
| High mobility group protein 2                                           | Hmg2        | biological regulation;cellular macromolecule metabolic process                                                | binding;nucleic acid binding;nucleotide binding                              | cell part;intracellular organelle part;intracellular region                                    | Spliceosome                                                                                |
| Calcyclin-binding protein                                               | Cacypb      | biological regulation;cell activation;cell surface signaling                                                  | binding;catalytic activity;cation binding;endopeptidase activity             | cell part;cell surface;cytoplasmic membrane-bounded organelle                                  | Alzheimer's disease;Epithelial cell signaling in HeLa cells                                |
| U1 small nuclear ribonucleoprotein A                                    | Snmp70      | alcohol metabolic process;amine metabolic process                                                             | binding;carboxypeptidase activity;catalytic activity                         | cell part,cytoplasmic part;endoplasmic reticulum                                               |                                                                                            |
| Disintegrin and metalloproteinase with thrombospondin type 1 motifs 1   | Adam10      | actin cytoskeleton organization;actin filament-based process                                                  | 1-phosphatidylinositol binding;actin binding;binding                         | actin cytoskeleton;cell cortex part;cell part;cell part                                        | Tight junction                                                                             |
| Carboxypeptidase X                                                      | Cpx         | biological regulation;positive regulation of biological process                                               | binding;carbohydrate binding;growth factor activity                          | cell part;centrosome;cytoplasm;cytoplasmic part                                                |                                                                                            |
| Band 4.1-like protein 1                                                 | Bpl411      | cellular component assembly;cellular component assembly                                                       | binding;DNA binding;nucleic acid binding                                     | cell part;chromosomal part;intracellular membrane                                              | Systemic lupus erythematosus                                                               |
| C-type lectin domain family 11 member 2                                 | Clec11a     | cellular component assembly;cellular component assembly                                                       | binding;DNA binding;nucleic acid binding                                     | cell part;chromosomal part;intracellular membrane                                              | Systemic lupus erythematosus                                                               |
| Histone H2B type 1-C/E/G                                                | Hist1h2bc   | activation of immune response;antigen receptor signaling                                                      | adenyl nucleotide binding;adenyl ribonucleotide binding                      | cell part,cytoplasm;cytoskeleton;intracellular region                                          | Osteoclast differentiation; Cell receptor signaling pathway                                |
| Tyrosine-protein kinase Tesc                                            | Tesc        | alcohol metabolic process;behavior;carbohydrate cation transport;cell cycle process;cellular cation transport | alpha-mannosidase activity;binding;carbohydrate structural molecule activity | cell part,cytoplasmic part;intracellular membrane                                              | Lysosome;Other glycan degradation                                                          |
| Clathrin heavy chain                                                    | Cltc        | biological regulation;cell proliferation;defense response                                                     |                                                                              | cell part;chromosomal part;clathrin coat;clathrin coat                                         | Bacterial invasion of epithelial cells;Endocrine and reproductive system                   |
| Insulin-like growth factor 1                                            | Igf1bp4     | actin cytoskeleton organization;actin filament-based process                                                  |                                                                              | extracellular region part;extracellular space                                                  |                                                                                            |
| Prefoldin 1                                                             | Pfdn1       | activation of immune response;biological regulation                                                           | binding;calcium ion binding;catalytic activity;catalytic activity            | cell part,cytoplasmic part;cytosolic part;intracellular region                                 | Complement and coagulation cascades;Phagosome                                              |
| Complement C1r-A subcomponent                                           | C1ra;C1rb   | active transmembrane transporter activity;adenyl nucleotide binding                                           |                                                                              | apical plasma membrane;cell junction;cell part;extracellular matrix                            | ABC transporters;Bile secretion                                                            |
| Bile salt export pump                                                   | Abc11       | biological regulation;cell redox homeostasis;cellular component organization;cellular component organization  | catalytic activity;flavin-linked sulfhydryl oxidase activity                 | cell part,cytoplasmic part;endoplasmic reticulum                                               |                                                                                            |
| Sulfhydryl oxidase 1                                                    | Qsox1       | biological regulation;blood coagulation;coagulation                                                           | binding;calcium ion binding;cation binding;ion binding                       | cell part,cytoplasmic part;endoplasmic reticulum                                               |                                                                                            |
| Prostaglandin F2 receptor                                               | Ptgfrn      | biological regulation;blood coagulation;coagulation                                                           | binding;calcium ion binding;nucleotide binding                               | cell part;extracellular matrix;extracellular region                                            |                                                                                            |
| EGF-containing fibulin-like extracellular matrix protein 2              | Efemp2      | cellular macromolecule metabolic process;cellular macromolecule metabolic process                             | binding;nucleic acid binding;nucleotide binding                              | cell part;intracellular organelle part;intracellular region                                    | Spliceosome                                                                                |
| U1 small nuclear ribonucleoprotein A                                    | Snra        | anatomical structure development;anatomical structure development                                             | binding;G-protein coupled receptor activity;modulator activity               | apical part of cell;cell part;cell projection membrane                                         | Basal cell carcinoma;Melanogenesis;Pathways in cancer                                      |
| Frizzled-2                                                              | Fzd2        | biological regulation;cellular component assembly                                                             | binding;DNA binding;nucleic acid binding                                     | actin cytoskeleton;cell part;chromosomal part                                                  | Systemic lupus erythematosus                                                               |
| Histone H4                                                              | Hist1h4a    | biological regulation;calcium ion transport;cation transport                                                  | binding;calcium ion binding;cation binding;ion binding                       | cell part;chromaffin granule membrane;contractile filament                                     |                                                                                            |
| Sorcin                                                                  | Sri         | biological regulation;negative regulation of biological process                                               | binding;calcium ion binding;cation binding;ion binding                       | cell part,cytoplasmic part;endoplasmic reticulum                                               |                                                                                            |
| Protein S100-A1;Protein S100                                            | S100a1      | biological regulation;cellular process;cellular process                                                       | molecular transducer activity;signal transducer activity                     | cell part,cytoplasmic part;endoplasmic reticulum                                               | p53 signaling pathway                                                                      |
| Protein shisa-5                                                         | Shisa5      | biological regulation;biosynthetic process;cellular process                                                   | binding;carbohydrate binding;DNA binding;glycyltransferase activity          | cell part,cytoplasm;extracellular region;cell projection                                       |                                                                                            |
| Hepatoma-derived growth factor                                          | Hdgf        | anatomical structure development;anatomical structure development                                             | binding;carbohydrate binding;molecular transducer activity                   | cell part;external side of plasma membrane;extracellular matrix                                |                                                                                            |
| Abi interactor 1                                                        | Abi1        | biological regulation;cellular defense response;amine biosynthetic process;amine catabolic process            | aldehyde-lyase activity;amine binding;amino acid binding                     | cell part,cytoplasmic part;cytosol;intracellular matrix                                        | Cyan amino acid metabolism;Glycine, serine and alanine metabolism                          |
| C-type lectin domain family 2 member 1                                  | Clec2d      | apoptosis;biological regulation;cell death;cellular process                                                   |                                                                              | cell part,cytoplasm;intracellular part                                                         |                                                                                            |
| KIF1-binding protein                                                    | Kif1bp      | anatomical structure development;cell differentiation                                                         |                                                                              | cell part,cytoplasmic part;intracellular membrane                                              |                                                                                            |
| NAD(P)H dehydrogenase 1                                                 | Nqo1        | aging;biological regulation;cellular metabolic process                                                        | antioxidant activity;catalytic activity;NAD(P)H dehydrogenase activity       | cell body;cell part,cytoplasmic part;cytosol;intracellular region                              |                                                                                            |
| Protein S100-A10                                                        | S100a10     | biological regulation;cellular process;cellular process                                                       | binding;calcium ion binding;cation binding;ion binding                       | cell part;extrinsic to membrane;extrinsic to plasma membrane                                   |                                                                                            |
| Cell surface hyaluronidase                                              | Tnm2        | developmental process;multicellular organismal development                                                    | catalytic activity                                                           | cell part,integral to membrane;intrinsic to membrane                                           |                                                                                            |
| Disco-interacting protein 2                                             | Dip2b       | anatomical structure development;biological regulation                                                        | structural molecule activity                                                 | cell part;intracellular membrane-bounded organelle                                             |                                                                                            |
| Prelamin-A/C                                                            | Lmna        | amibeoidal cell migration;anatomical structure development                                                    | adenyl nucleotide binding;adenyl ribonucleotide binding                      | apical plasma membrane;basolateral plasma membrane                                             | Adherens junction;Bladder cancer;Calcium signaling pathway                                 |
| Epidermal growth factor receptor                                        | Egfr        | adhesion to other organism involved in symbiotic relationship                                                 | binding;nucleic acid binding;GTP binding                                     | cell part,cytoplasmic part;cytoplasmic vesicle;extracellular region                            |                                                                                            |
| Guanylate-binding protein                                               | Gbp2        | biological regulation;negative regulation of catabolic process                                                | endopeptidase inhibitor activity;endopeptidase inhibitor activity            | basal plasma membrane;basement membrane;extracellular region                                   |                                                                                            |
| WAP four-disulfide core domain 2                                        | Wfdc2       | anatomical structure morphogenesis;biological adhesion                                                        | binding;cation binding;ion binding;metal ion binding                         |                                                                                                |                                                                                            |
| Integrin alpha-6                                                        | Itg6        |                                                                                                               |                                                                              |                                                                                                |                                                                                            |



|                                |                 |                                                                                    |                                                                                                     |                                                                                                         |
|--------------------------------|-----------------|------------------------------------------------------------------------------------|-----------------------------------------------------------------------------------------------------|---------------------------------------------------------------------------------------------------------|
| Galactin-1                     | Lgals1          | B cell activation; B cell activation involved in immune response                   | binding; carbohydrate binding; disaccharide binding                                                 | cell part; cell surface; cytoplasm; extracellular matrix                                                |
| Tropomyosin 3, related ser     | Tpm3-rs7        | anatomical structure development; brain development                                | binding; catalytic activity; cation binding; ion binding                                            | actin filament bundle; actomyosin; cell cortex part                                                     |
| Transketolase; Transketol      | Tkt             | biological regulation; regulation of biological process                            | binding; catalytic activity; cation binding; ion binding                                            | cell part; intracellular membrane-bounded vesicle                                                       |
| MCC3; Galactin-3               | Lgals3          | anatomical structure development; cell differentiation                             | binding; carbohydrate binding                                                                       | cell part; cytoplasm; cytoplasmic part; extracellular space                                             |
| MCG4375; isoform CRA_1         | Sdcbp           | biological regulation; cellular process; cellular response                         | binding; cytokine receptor binding; growth factor binding                                           | cell part; cytoplasm; cytoplasmic membrane-bounded vesicle                                              |
| Acid sphingomyelinase-like     | Smpd13b         | catabolic process; cellular catabolic process; cellular component organization     | catalytic activity; hydrolase activity; hydrolase activity                                          | extracellular region part; extracellular space                                                          |
| Receptor-type tyrosine-pro     | Ptpra           | biological regulation; cell surface receptor linked                                | binding; catalytic activity; hydrolase activity; hydrolase activity                                 | cell part; cytoplasm; cytoskeleton; integral to membrane                                                |
| Tropomyosin alpha-3 chain      | Tpm3            | behavior; behavioral interaction between organisms                                 | binding; calcium ion binding; calcium-dependent binding                                             | actin filament bundle; actomyosin; cell cortex part                                                     |
| Annexin A7                     | Anxa7           | anatomical structure development; anatomical structure                             | binding; calcium ion binding; calcium-dependent binding                                             | cell part; chromaffin granule membrane; cytoplasm                                                       |
| Vimentin                       | Vim             | anatomical structure development; anatomical structure                             | structural constituent of cytoskeleton; structural constituent of cytoskeleton                      | adherens junction; anchoring junction; axon; axon cell part; cytoplasmic part; endosomal part; endosome |
| Transmembrane protein 12       | Tmem106b        | response to chemical stimulus; response to oxidant                                 | binding; cation binding; ion binding; metal ion binding                                             | actin filament bundle; actomyosin; cell cortex part                                                     |
| Tropomyosin alpha-4 chain      | Tpm4            | response to chemical stimulus; response to oxidant                                 | binding; cation binding; ion binding; metal ion binding                                             | actin filament bundle; actomyosin; cell cortex part                                                     |
| Glutamate--cysteine ligase     | Gclm            | amine biosynthetic process; amine metabolic process                                | acid-amino acid ligase activity; binding; catalytic activity                                        | cell part; cytoplasmic part; glutamate-cysteine ligase                                                  |
| Cullin-associated NEDD8-cl     | Cand1           | biological regulation; cell differentiation; cellular process                      | binding; catalytic activity; cation binding; ion binding                                            | cell part; cullin-RING ubiquitin ligase complex; cytoplasm                                              |
| EH domain-containing prote     | Ehd2            | actin cytoskeleton organization; actin filament-bundling                           | adenyl nucleotide binding; adenyl ribonucleotide binding                                            | cell part; cytoplasmic part; endosomal part; endosome                                                   |
| Neural cell adhesion mole      | Ncam1           | biological adhesion; biological regulation; cell adhesion                          | binding; carbohydrate binding; glycosaminoglycan binding                                            | anchored to membrane; axon; cell body; cell part; cell projection                                       |
| Superoxide dismutase [Cu       | Sod1            | activation of MAPK activity; aging; amine metabolic process                        | antioxidant activity; binding; catalytic activity; catalytic activity                               | cell body; cell part; cell projection cytoplasm; cell projection                                        |
| Nerxin                         | Anxa6           | biological regulation; calcium ion transport; cation transport                     | binding; calcium ion binding; calcium-dependent binding                                             | cell part; cytoplasmic part; intracellular part; pericardium                                            |
| ADP-ribosyl cyclase/cyclic     | Bst1            | biological regulation; cell death; cellular macromolecule metabolic process        | catalytic activity; hydrolase activity; hydrolase activity                                          | anchored to membrane; cell part; intrinsic to membrane                                                  |
| Clusterin; Clusterin (Fragm    | Clu             | biological regulation; cell death; cellular macromolecule metabolic process        | binding; enzyme binding; misfolded protein binding                                                  | cell part; chromaffin granule; cytoplasmic membrane                                                     |
| Atlastin-3                     | At13            | anatomical structure morphogenesis; axonogenesis                                   | binding; catalytic activity; GTP binding; GTPase activity                                           | axon; cell part; cell projection; cytoplasmic membrane                                                  |
| Endoplasmic; Endoplasmic       | Hsp90b1         | actin cytoskeleton organization; actin filament organization                       | adenyl nucleotide binding; adenyl ribonucleotide binding                                            | cell part; cytoplasmic membrane-bounded vesicle                                                         |
| Actin-related protein 2        | Actr2           | actin cytoskeleton organization; actin filament organization                       | adenyl nucleotide binding; adenyl ribonucleotide binding                                            | actin cap; Arp2/3 protein complex; cell cortex part                                                     |
| 78 kDa glucose-regulated       | Hspa5           | activation of signaling protein activity involved in biological adhesion           | adenyl nucleotide binding; adenyl ribonucleotide binding                                            | cell part; cell surface; cytoplasmic membrane-bounded vesicle                                           |
| Actin-related protein 3        | Actr3           | actin cytoskeleton organization; actin filament organization                       | adenyl nucleotide binding; adenyl ribonucleotide binding                                            | Arp2/3 protein complex; cell junction; cell part; cell projection                                       |
| Succinate dehydrogenase        | SdhA            | acetyl-CoA catabolic process; acetyl-CoA metabolic process                         | binding; catalytic activity; coenzyme binding; cofactor binding                                     | cell part; cytoplasmic part; fumarate reductase complex                                                 |
| Armet protein; Arginine-ric    | Manf            | biological regulation; circulatory system process                                  | binding; catalytic activity; coenzyme binding; cofactor binding                                     | cell part; cytoplasmic part; extracellular region; extracellular space                                  |
| 60S ribosomal protein L34      | Rpl34           | biosynthetic process; cellular biosynthetic process                                | structural constituent of ribosome; structural constituent of ribosome                              | cell part; cytoplasmic part; intracellular non-membrane-bounded vesicle                                 |
| Renin receptor                 | Atp6ap2         | angiotensin maturation; biological regulation; homeostasis                         | receptor activity                                                                                   | cell body; cell part; cell projection; external side of membrane                                        |
| Alkylglycerone-phosphate       | Agps            | biosynthetic process; cellular biosynthetic process                                | alkylglycerone-phosphate synthase activity; binding                                                 | cell part; cytoplasmic part; intracellular membrane-bounded vesicle                                     |
| 60S ribosomal protein L27      | Rpl27           | biosynthetic process; cellular biosynthetic process                                | structural constituent of ribosome; structural constituent of ribosome                              | cell part; cytoplasmic part; cytosolic large ribosomal subunit                                          |
| Unconventional myosin-V        | Myo6            | anatomical structure development; anatomical structure development                 | actin binding; actin filament binding; adenyl nucleotide binding                                    | axon; cell body; cell part; cell projection; clathrin-coated vesicle                                    |
| 40S ribosomal protein S6       | Rps6            | biological regulation; biosynthetic process; carbohydrate metabolic process        | structural constituent of ribosome; structural constituent of ribosome                              | cell part; intracellular non-membrane-bounded vesicle                                                   |
| 40S ribosomal protein S11      | Rps11           | biosynthetic process; cellular biosynthetic process                                | binding; nucleic acid binding; RNA binding; RNA binding                                             | cell part; cytosolic small ribosomal subunit; intracellular organelle part                              |
| 40S ribosomal protein S3       | Rps3            | biosynthetic process; cellular biosynthetic process                                | binding; nucleic acid binding; RNA binding; RNA binding                                             | cell part; cytoplasm; intracellular organelle part                                                      |
| Tubulin alpha-1B chain         | Tuba1b          | cellular component assembly; cellular component organization                       | binding; catalytic activity; GTP binding; GTPase activity                                           | cell part; cytoplasmic microtubule; cytoplasmic microtubule                                             |
| 60S ribosomal protein L4       | Rpl4            | biosynthetic process; cellular biosynthetic process                                | structural constituent of ribosome; structural constituent of ribosome                              | cell part; cytosolic large ribosomal subunit; intracellular organelle part                              |
| Glypican-4                     | Gpc4            | cellular component biogenesis; cellular component organization                     | binding; cation binding; ion binding; metal ion binding                                             | anchored to membrane; cell part; cytoplasmic part; cytoplasmic membrane                                 |
| 60S ribosomal protein L7a      | Rpl7a; Rpl7a-ps | biosynthetic process; cellular biosynthetic process                                | binding; cation binding; ion binding; metal ion binding                                             | cell part; cytosolic small ribosomal subunit; intracellular organelle part                              |
| 40S ribosomal protein S27      | Rps27           | biosynthetic process; cellular biosynthetic process                                | binding; nucleic acid binding; RNA binding; RNA binding                                             | cell part; cytosolic small ribosomal subunit; intracellular organelle part                              |
| 40S ribosomal protein S2       | Rps2; Rps2-ps6  | biosynthetic process; cellular biosynthetic process                                | binding; nucleic acid binding; RNA binding; RNA binding                                             | cell part; intracellular organelle part; intracellular organelle part                                   |
| Dolichyl-diphosphooligosac     | Dodost          | carbohydrate metabolic process; cell activation; cellular process                  | binding; catalytic activity; dolichyl-diphosphooligosaccharide synthase activity                    | cell part; cytoplasmic part; endoplasmic reticulum                                                      |
| Aconitate hydratase, mito      | Aco2            | acetyl-CoA catabolic process; acetyl-CoA metabolic process                         | 3-iron, 4-sulfur cluster binding; 4-iron, 4-sulfur cluster binding                                  | cell part; cytoplasmic part; intracellular membrane-bounded vesicle                                     |
| Caveolin-1; Caveolin (Frag     | Cav1            | acylglycerol metabolic process; anatomical structure development                   | enzyme activator activity; enzyme regulator activity                                                | acrossomal membrane; apical plasma membrane                                                             |
| 26S proteasome regulator       | Psmc3           | anatomical structure development; blastocyst development                           | adenyl nucleotide binding; adenyl ribonucleotide binding                                            | cell part; cytoplasm; cytoplasmic mRNA processing body                                                  |
| 60S ribosomal protein L18      | Rpl18           | biosynthetic process; cellular biosynthetic process                                | structural constituent of ribosome; structural constituent of ribosome                              | cell part; cytosolic large ribosomal subunit; intracellular organelle part                              |
| Secretory carrier-associated   | Scamp2          | establishment of localization; establishment of localization                       | anatomical structure development; anatomical structure development                                  | basal lamina; extracellular matrix part; extracellular matrix                                           |
| Benzoate membrane-spe          | Hspg2           | acyl-CoA hydratase, mitochondrial                                                  | carbon-oxygen lyase activity; catalytic activity; enzyme activator activity                         | cell part; cytoplasmic part; intracellular membrane-bounded vesicle                                     |
| 60S ribosomal protein L3       | Rpl3            | biosynthetic process; cellular biosynthetic process                                | structural constituent of ribosome; structural constituent of ribosome                              | cell part; cytosolic large ribosomal subunit; intracellular organelle part                              |
| Cytoskeleton-associated p      | Ckap4           | acetyl-CoA biosynthetic process; acetyl-CoA biosynthetic process                   | catalytic activity; oxidoreductase activity; oxidoreductase activity                                | cell part; cytoplasmic part; cytoskeleton; endoplasmic reticulum                                        |
| Pyruvate dehydrogenase E       | Pdhb            | acetyl-CoA biosynthetic process; cellular biosynthetic process                     | catalytic activity; oxidoreductase activity; oxidoreductase activity                                | cell part; cytoplasmic part; intracellular membrane-bounded vesicle                                     |
| 60S ribosomal protein L6       | Rpl6            | 2-oxoglutarate metabolic process; acetyl-CoA biosynthetic process                  | binding; catalytic activity; cation binding; coenzyme binding                                       | cell part; cytoplasm; cytoplasmic part; intracellular organelle part                                    |
| Iso citrate dehydrogenase      | Ihd2            | cellular process; establishment of localization; enzyme activator activity         | binding; catalytic activity; cation binding; coenzyme binding                                       | cell part; cell surface; cytoplasmic membrane-bounded vesicle                                           |
| Endoplasmic reticulum re       | Epr29           | biosynthetic process; cellular biosynthetic process                                | structural constituent of ribosome; structural constituent of ribosome                              | cell part; cytosolic large ribosomal subunit; intracellular organelle part                              |
| 60S ribosomal protein L30      | Rpl30           | biological regulation; calcium ion homeostasis; calcium ion homeostasis            | binding; calcium ion binding; cation binding; ion binding                                           | cell part; cytoplasmic part; integral to membrane                                                       |
| MICOS complex subunit N        | Immt            | carbohydrate metabolic process; cellular carbohydrate metabolic process            | catalytic activity; dolichyl-diphosphooligosaccharide synthase activity                             | cell part; cytoplasmic part; endoplasmic reticulum                                                      |
| Dolichyl-diphosphooligos       | Stt3a           | aging; cellular component organization; cellular component organization            | binding; calcium ion binding; cation binding; ion binding                                           | axon; cell body; cell part; cell projection; cell projection                                            |
| Calnexin                       | Canx            | biological regulation; cellular process; cellular response                         | structural constituent of ribosome; structural constituent of ribosome                              | cell part; cytoplasmic part; endoplasmic reticulum                                                      |
| Translocon-associated prote    | Ssr1            | biological regulation; cellular process; cellular response                         | catalytic activity; cysteine-type endopeptidase activity                                            | cell part; cytoplasmic part; cytosol; cytosolic small ribosomal subunit                                 |
| 40S ribosomal protein S3a      | Rps3a           | cellular component assembly; cellular component organization                       | structural constituent of ribosome; structural constituent of ribosome                              | cell part; cytosolic small ribosomal subunit; intracellular organelle part                              |
| Cathepsin B                    | Ctsb            | cellular component assembly; cellular component organization                       | structural constituent of ribosome; structural constituent of ribosome                              | cell part; cytosolic small ribosomal subunit; intracellular organelle part                              |
| 40S ribosomal protein S25      | Rps25           | biosynthetic process; cellular biosynthetic process                                | binding; nucleic acid binding; RNA binding; RNA binding                                             | cell part; cytosolic large ribosomal subunit; intracellular organelle part                              |
| 60S ribosomal protein L8       | Rpl8            | biological regulation; cellular process; cellular response                         | binding; nucleic acid binding; RNA binding; RNA binding                                             | cell part; cytoplasmic part; fatty acid beta-oxidation                                                  |
| Trifunctional enzyme subu      | Hadha           | biological regulation; cell differentiation; cell differentiation                  | binding; nucleic acid binding; RNA binding; RNA binding                                             | cell part; cell projection part; cytoplasm; growth cone                                                 |
| Brain acid soluble protein     | Basp1           | biosynthetic process; cellular biosynthetic process                                | binding; nucleic acid binding; RNA binding; RNA binding                                             | cell part; cytosolic small ribosomal subunit; intracellular organelle part                              |
| 40S ribosomal protein S16      | Rps16           | biosynthetic process; cellular biosynthetic process                                | binding; nucleic acid binding; RNA binding; RNA binding                                             | cell part; cytoplasmic part; intracellular non-membrane-bounded vesicle                                 |
| 60S ribosomal protein L21      | Rpl21           | anatomical structure morphogenesis; biological process                             | acid-thiol lyase activity; ATP citrate synthase activity                                            | adherens junction; anchoring junction; cell junction                                                    |
| Catenin delta-1                | Ctnd1           | acetyl-CoA catabolic process; acetyl-CoA metabolic process                         | catalytic activity; disulfide oxidoreductase activity                                               | cell part; cytoplasmic part; intracellular organelle part                                               |
| Succinate--CoA ligase [AD      | Sucd1           | biological regulation; cell redox homeostasis; cellular redox homeostasis          | catalytic activity; disulfide oxidoreductase activity                                               | cell part; cell surface; cytoplasmic membrane-bounded vesicle                                           |
| Protein disulfide-isomeras     | Pdia3           | biological regulation; cellular biosynthetic process; cellular redox homeostasis   | binding; nucleic acid binding; RNA binding; RNA binding                                             | cell part; intracellular organelle part; intracellular organelle part                                   |
| 60S ribosomal protein L28      | Rpl28           | biosynthetic process; cellular biosynthetic process                                | structural constituent of ribosome; structural constituent of ribosome                              | cell part; cytoplasmic part; intracellular non-membrane-bounded vesicle                                 |
| 40S ribosomal protein S4       | Rps4            | biological regulation; biosynthetic process; cellular redox homeostasis            | binding; nucleic acid binding; RNA binding; RNA binding                                             | cell part; intracellular organelle part; intracellular organelle part                                   |
| 40S ribosomal protein S15      | Rps15a          | biological regulation; biosynthetic process; cellular redox homeostasis            | binding; nucleic acid binding; RNA binding; RNA binding                                             | cell part; cytosolic small ribosomal subunit; intracellular organelle part                              |
| 60S ribosomal protein L35      | Rpl35a          | biosynthetic process; cellular biosynthetic process                                | structural constituent of ribosome; structural constituent of ribosome                              | cell part; cytosolic large ribosomal subunit; intracellular organelle part                              |
| Acyetyl-CoA acetyltransfer     | Acat1           | adipose tissue development; anatomical structure development                       | binding; catalytic activity; CoA acetyltransferase activity; acetyl-CoA synthase activity           | cell part; cytoplasmic part; intracellular organelle part                                               |
| Very-long-chain 3-oxoacyl      | Hsd17b12        | biological regulation; biosynthetic process; carbohydrate metabolic process        | binding; catalytic activity; CoA acetyltransferase activity; acetyl-CoA synthase activity           | cell part; cytoplasmic part; endoplasmic reticulum                                                      |
| Heat shock protein beta-1      | Hspb1           | biological regulation; cell surface receptor linked                                | binding; enzyme binding; enzyme inhibitor activity                                                  | cell part; cell surface; contractile fiber part; cytoplasmic part                                       |
| Cytochrome b5 type B           | Cyb5b           | cellular metabolic process; cellular process; electron transport                   | binding; catalytic activity; enzyme activator activity                                              | cell part; cytoplasmic part; integral to membrane                                                       |
| Voltage-dependent anion        | Vdac2           | biological regulation; cellular process; establishment of localization             | anion channel activity; anion transmembrane transporter activity                                    | cell part; cytoplasmic part; intracellular non-membrane-bounded vesicle                                 |
| Nicalin                        | Ncin            | biological regulation; macromolecule metabolic process                             | catalytic activity; hydrolase activity; peptidase activity                                          | cell part; cytoplasmic part; endoplasmic reticulum                                                      |
| Peroxisomal multifunctio       | Hsd17b4         | anatomical structure development; carboxylic acid metabolic process                | binding; catalytic activity; 3-alpha,7-alpha,12-alpha-trihydroxy-Delta-cholesterol oxidase activity | cell part; cytoplasmic part; intracellular membrane-bounded vesicle                                     |
| Rho guanine nucleotide e       | Arhgef2         | actin cytoskeleton organization; actin filament organization                       | binding; cation binding; binding; cytoskeletal protein binding                                      | cell body; cell junction; cell part; cell projection membrane                                           |
| 3-ketoacyl-CoA thiolase, m     | Acaa2           | biological regulation; carboxylic acid metabolic process                           | acetyl-CoA C-acyltransferase activity; C-acyltransferase activity                                   | cell part; cytoplasmic part; intracellular organelle part                                               |
| Sphingosine-1-phosphate        | Sgpl1           | ameboid cell migration; anatomical structure development                           | aldehyde-lyase activity; binding; carbon-carbon bond formation                                      | cell part; cytoplasmic part; endoplasmic reticulum                                                      |
| MCG134445; isoform CRA_1       | Mroh1           | acetyl-CoA catabolic process; acetyl-CoA metabolic process                         | carbon-oxygen lyase activity; catalytic activity; fumarate hydratase activity                       | cell part; cytoplasmic part; intracellular membrane-bounded vesicle                                     |
| Fumarate hydratase, mito       | Fh              | ATP biosynthetic process; ATP metabolic process                                    | ATPase activity; catalytic activity; cation transport                                               | cell part; cytoplasmic part; intracellular membrane-bounded vesicle                                     |
| ATP synthase subunit e         | Atp5f1          | cellular metabolic process; cellular process; electron transport                   | catalytic activity; electron carrier activity; NADH dehydrogenase activity                          | cell part; cytoplasmic part; intracellular membrane-bounded vesicle                                     |
| NADH dehydrogenase [ub         | Ndufa12         | biosynthetic process; cellular biosynthetic process                                | structural constituent of ribosome; structural constituent of ribosome                              | cell part; cytoplasmic part; cytosolic large ribosomal subunit                                          |
| 60S ribosomal protein L10      | Rpl10; Rpl10    | biological regulation; cell activation; cell activation                            | binding; calcium ion binding; calcium-dependent binding                                             | cell part; cytoplasmic membrane-bounded vesicle                                                         |
| Annexin A3                     | Anxa3           | activation-induced cell death of T cells; aging; aging                             | adenyl nucleotide binding; adenyl ribonucleotide binding                                            | cell part; cytoplasm; cytoplasmic part; cytoskeletal part                                               |
| RAC-alpha serine/threoni       | Akt1            | peroxisome assembly; anatomical structure development                              | structural constituent of ribosome; structural constituent of ribosome                              | cell part; cytoplasmic part; cytosolic large ribosomal subunit                                          |
| 60S ribosomal protein L38      | Rpl38           | carboxylic acid catabolic process; carboxylic acid metabolic process               | 3-hydroxyacyl-CoA dehydrogenase activity; acetyl-CoA synthase activity                              | cell part; cytoplasmic part; endoplasmic reticulum                                                      |
| Trifunctional enzyme subu      | Hadhb           | biosynthetic process; cellular biosynthetic process                                | structural constituent of ribosome; structural constituent of ribosome                              | cell part; cytoplasmic part; cytosolic large ribosomal subunit                                          |
| 60S ribosomal protein L23      | Rpl23           | biosynthetic process; cellular biosynthetic process                                | structural constituent of ribosome; structural constituent of ribosome                              | cell part; cytoplasmic part; intracellular non-membrane-bounded vesicle                                 |
| 60S ribosomal protein L27      | Rpl27a          | alcohol metabolic process; anatomical structure development                        | binding; catalytic activity; drug binding; hydroxymethylglutaryl-CoA lyase activity                 | cell part; cytoplasmic part; cytosol; intracellular non-membrane-bounded vesicle                        |
| Hydroxymethylglutaryl-Co       | Hmgcs1          | biological regulation; biosynthetic process; cell death                            | angiotensin binding; ATPase binding; ATPase inhibition                                              | cell part; cell surface; cytoplasmic part; intracellular organelle part                                 |
| ATPase inhibitor, mitoch       | Atp1f1          | establishment of localization; transport                                           | active transmembrane transporter activity; secondary active transmembrane transporter activity      | cell part; cytoplasmic part; integral to membrane                                                       |
| Phosphate carrier, mitoch      | Slc25a3         | aging; biological regulation; catabolic process; cell death                        | adenyl nucleotide binding; adenyl ribonucleotide binding                                            | cell part; cytoplasmic part; intracellular non-membrane-bounded vesicle                                 |
| Lon protease homolog, m        | Lonp1           | biological regulation; cellular biosynthetic process                               | structural constituent of ribosome; structural constituent of ribosome                              | cell part; cytosolic small ribosomal subunit; intracellular organelle part                              |
| 40S ribosomal protein S23      | Rps23           | establishment of localization; establishment of localization                       | acidic amino acid transmembrane transporter activity                                                | cell part; integral to membrane; integral to plasma membrane                                            |
| Calcium-binding mitoch         | Slc25a12        | cellular macromolecule metabolic process; cellular macromolecule metabolic process | adenyl nucleotide binding; adenyl ribonucleotide binding                                            | cell part; cytoplasmic part; cytosolic large ribosomal subunit                                          |
| Transporter; Sodium- and       | Slc6a8; Slc6a   | cellular macromolecule metabolic process; cellular macromolecule metabolic process | adenyl nucleotide binding; adenyl ribonucleotide binding                                            | cell part; cell surface; cytoplasmic part; intracellular organelle part                                 |
| 60S ribosomal protein L24      | Rpl24           | anatomical structure formation involved in morphogenesis                           | active transmembrane transporter activity; ATPase activity                                          | cell part; cytoplasmic membrane-bounded vesicle                                                         |
| Stress-70 protein, mitoch      | Hspa9           | biological regulation; cellular process; cation transport                          | binding; catalytic activity; cation binding; ferric iron binding                                    | cell part; ferritin complex; intracellular ferritin complex                                             |
| Angiopietin-related prote      | Angpt1          | ATP hydrolysis coupled proton transport; cation transport                          | adenyl nucleotide binding; adenyl ribonucleotide binding                                            | cell part; cytoplasm; intracellular organelle part                                                      |
| V-type proton ATPase sub       | Atp6v1h         | biological regulation; cellular process; cation transport                          | binding; catalytic activity; cation binding; ferric iron binding                                    | cell part; cytoplasm; intracellular organelle part                                                      |
| Ferritin; Ferritin light chain | Fh1             | amine biosynthetic process; amine metabolic process                                | adenyl nucleotide binding; adenyl ribonucleotide binding                                            | cell part; cytoplasm; intracellular organelle part                                                      |
| Delta-1-pyrroline-5-carbo      | Aldh18a1        | cellular macromolecule metabolic process; cellular macromolecule metabolic process | cellular process; establishment of localization; transport                                          | cell part; cytoplasmic part; endoplasmic reticulum                                                      |
| COP9 signalosome comple        | Cops7a          | cellular process; establishment of localization; transport                         | enzyme activator activity; enzyme regulator activity                                                | cell part; cytoplasmic part; integral to membrane                                                       |
| Signal sequence receptor       | Ssr4            | cellular process; establishment of localization; transport                         | enzyme activator activity; enzyme regulator activity                                                | cell part; intracellular                                                                                |
| Tricarboxylate transport       | Slc25a1         | biological regulation; cellular process; cellular response                         | enzyme activator activity; enzyme regulator activity                                                | cell part; intracellular                                                                                |
| Rho GTPase-activating pr       | Arhgap8         | biological regulation; cellular process; cellular response                         | enzyme activator activity; enzyme regulator activity                                                | cell part; intracellular                                                                                |

|                               |              |                                                    |                                                    |                                                    |                                                     |
|-------------------------------|--------------|----------------------------------------------------|----------------------------------------------------|----------------------------------------------------|-----------------------------------------------------|
| Calreticulin                  | Calr         | actin cytoskeleton organization;actin filament     | binding;calcium ion binding;carbohydrate bindi     | acrosomal vesicle;cell part;cytoplasmic membra     | Antigen processing and presentation;Chagas dis      |
| V-type proton ATPase sub      | Atp6v0a1     | ATP hydrolysis coupled proton transport;cat        | anion transmembrane transporter activity;hydr      | cell part;cytoplasm;cytoplasmic membrane;bou       | Collecting duct acid secretion;Epithelial cell sign |
| Tryptophan--tRNA ligase       | Wars         | amine metabolic process;amino acid activation;     | adenyl nucleotide binding;adenyl ribonucleotid     | cell part;cytoplasm;intracellular part             | Aminacyl-tRNA biosynthesis;Tryptophan metabol       |
| 60S ribosomal protein L36     | Rpl36a;Gm65  | biological process;cellular biosynthetic proces    | structural constituent of ribosome;structural me   | cell part;cytoplasmic part;intracellular non-mem   | Ribosome                                            |
| 7-dehydrocholesterol red      | Dhcr7        | alcohol metabolic process;anatomical structure     | 7-dehydrocholesterol reductase activity;catalyt    | cell part;cytoplasmic part;endoplasmic reticul     | Steroid biosynthesis                                |
| Acyl-coenzyme A thioeste      | Acot9;Acot10 | acyl-CoA metabolic process;cellular metabolic p    | acyl-CoA hydrolase activity;acyl-CoA hydrolas      | cell part;cytoplasmic part;intracellular membra    |                                                     |
| 3-keto-steroid reductase      | Hsd17b7      | alcohol metabolic process;biological regulati      | 3-keto-steroid reductase activity;catalytic activ  | cell part;cytoplasmic part;endoplasmic reticul     | Steroid biosynthesis;Steroid hormone biosynthe      |
| Calcium-binding mitochor      | Sic25a24     | cellular process;establishment of localization;tr  | binding;calcium ion binding;cation binding;ion b   | cell part;cytoplasmic part;integral to membrane    |                                                     |
| V-type proton ATPase sub      | Atp6v1e      | ATP hydrolysis coupled proton transport;cat        | anion transmembrane transporter activity;ATP a     | acrosomal vesicle;apical plasma membrane;cel       | Collecting duct acid secretion;Epithelial cell sign |
| V-type proton ATPase sub      | Atp6v1b2     | ATP hydrolysis coupled proton transport;ATP m      | adenyl nucleotide binding;adenyl ribonucleotid     | apical plasma membrane;basolateral plasma me       | Collecting duct acid secretion;Epithelial cell sign |
| ATP synthase subunit epsi     | Atp5e        | ATP biosynthetic process;ATP metabolic process     | active transmembrane transporter activity;ATP      | cell part;cytoplasmic part;intracellular organell  | Alzheimer's disease;Huntington's disease;Oxidat     |
| 60S ribosomal protein L31     | Rpl31        | biological process;cellular biosynthetic proces    | structural constituent of ribosome;structural me   | cell part;cytosolic large ribosomal subunit;intra  | Ribosome                                            |
| 40S ribosomal protein S26     | Rps26        | biological regulation;biosynthetic process;cellul  | binding;mRNA binding;nucleic acid binding;RNA      | cell part;cytosolic small ribosomal subunit;intra  | Ribosome                                            |
| Tumor necrosis factor rec     | Tradd        | biological regulation;induction of apoptosis;ind   | binding;binding, bridging;molecular transducer     | cell part;cytoplasm;cytoskeleton;intracellular m   | Adipocytokine signaling pathway;Apoptosis;Hep       |
| Rhn-chain-specific acyl-C     | Acadl        | amine catabolic process;amine metabolic proces     | acyl-CoA dehydrogenase activity;acyl-CoA oxid      | cell part;cytoplasmic part;intracellular membra    | Fatty acid metabolism;PPAR signaling pathway        |
| Argininosuccinate synthas     | Ass1         | amide biosynthetic process;amine biosynthetic      | adenyl nucleotide binding;adenyl ribonucleotid     | cell part;cytoplasmic part;intracellular membra    | Alanine, aspartate and glutamate metabolism;A       |
| V-type proton ATPase sub      | Atp6v0d1     | anatomical structure development;anatomical s      | active transmembrane transporter activity;ATP      | apical plasma membrane;axon part;axon termin       | Collecting duct acid secretion;Epithelial cell sign |
| Neutral cholesterol ester     | Nce11        | ATP catabolic process;cellular macromolecule m     | anion binding;binding;carboxylesterase activi      | cell part;cytoplasmic part;endoplasmic reticul     | BILE secretion                                      |
| Tubulin beta-5 chain          | Tubb5        | cellular component assembly;cellular compon        | binding;catalytic activity;GTP binding;GTPase ac   | cell body;cell part;cytoplasm;cytoplasmic part;c   | Gap junction;Pathogenic Escherichia coli infecti    |
| Sphingolipid delta(4)-desa    | Degs1        | cellular process;carboxylic acid biosynthetic      | catalytic activity;oxidoreductase activity;oxid    | cell part;cytoplasmic part;endoplasmic reticul     | Sphingolipid metabolism                             |
| rRNA 2.0-methyltransfer       | Fbl          | cellular macromolecule metabolic process;cellu     | binding;catalytic activity;methytransferase activ  | Cajal body;cell part;dense fibrillar component;g   | Ribosome biogenesis in eukaryotes                   |
| Actin-related protein 2/3     | Arpc5        | biological regulation;cellular component organi    | biological regulation;calcium ion binding;actin m  | Arp2/3 protein complex;cell part;cell projectio    | Bacterial invasion of epithelial cells;Fc gamma R   |
| Fibronectin                   | Fn1          | biological adhesion;calcium-independent cell-m     | enzyme activator activity;enzyme regulator acti    | apical plasma membrane;basement membrane;          | Amoebiasis;Bacterial invasion of epithelial cells   |
| Aldehyde dehydrogenase        | Aldh2        | 9-cis-retinoic acid biosynthetic process;9-cis-ret | 3-chloroalanyl aldehyde dehydrogenase activi       | cell part;cytoplasm;cytoplasmic part;cytosol;intra | Arginine and proline metabolism;Ascorbate and       |
| ADP-ribosylation factor-1     | Ar11         | activation of phospholipase D activity;biological  | binding;catalytic activity;cation binding;enzym    | cell part;cytoplasmic part;Golgi apparatus;Golgi   | Calcium signaling pathway                           |
| Electron transfer flavopro    | Efta         | cellular metabolic process;cellular process;elect  | binding;catalytic activity;coenzyme binding;cofa   | cell part;cytoplasmic part;electron transfer flav  |                                                     |
| 60S ribosomal protein L32     | Rpl32        | biological process;cellular biosynthetic proces    | structural constituent of ribosome;structural me   | cell part;cytoplasmic part;cytosolic large riboso  | Ribosome                                            |
| Heat shock protein 75 kDa     | Trap1        | cellular macromolecule metabolic process;cellu     | adenyl nucleotide binding;adenyl ribonucleotid     | cell part;cytoplasmic part;intracellular membra    |                                                     |
| V-type proton ATPase sub      | Atp6v1d      | anatomical structure formation involved in mor     | active transmembrane transporter activity;ATP      | cell part;cytoplasmic part;intracellular organell  | Collecting duct acid secretion;Epithelial cell sign |
| V-type proton ATPase catal    | Atp6v1a      | ATP hydrolysis coupled proton transport;ATP m      | active transmembrane transporter activity;aden     | apical plasma membrane;cell part;cell projectio    | Collecting duct acid secretion;Epithelial cell sign |
| Transmembrane 9 superfa       | Tms9s2       | ATP biosynthetic process;ATP metabolic process     | cation transmembrane transporter activity;hydr     | cell part;cytoplasmic part;intracellular organell  | Alzheimer's disease;Huntington's disease;Oxidat     |
| Oligosaccharyltransferase     | Ostc         | ATP biosynthetic process;ATP metabolic proces      | binding;carbohydrate binding                       | cell part;integral to membrane;intrinsic to mem    |                                                     |
| ATP synthase F(0) comple      | Atp5f1       | ATP biosynthetic process;amine metabolic proc      | aldehyde-lyase activity;amine binding;amino ac     | cell part;cytoplasmic part;cytoskeleton;intra      | Cyanoamino acid metabolism;Glycine, serine an       |
| Nodal modulator 1             | Nomo1        | 10-formyltetrahydrofolate biosynthetic proces      | adenyl nucleotide binding;adenyl ribonucleotid     | cell part;cytoplasmic part;intracellular membra    | One carbon pool by folate                           |
| Serine hydroxymethyltran      | Shmt2        | ATP biosynthetic process;ATP metabolic proces      | ATPase activity;catalytic activity;hydrolase activ | cell part;cytoplasmic part;integral to membrane    | Oxidative phosphorylation                           |
| Monofunctional C1-tetra       | Mthfd11      | ATP biosynthetic process;ATP metabolic proces      | adrenergic receptor binding;binding;carbohydr      | cell part;cell surface;cytoplasmic part;cytosol;ex |                                                     |
| ATP synthase subunit f, m     | Atp5f1       | ATP biosynthetic process;ATP metabolic proces      | active transmembrane transporter activity;ATP      | cell part;cytoplasmic part;intracellular organell  | Alzheimer's disease;Huntington's disease;Oxidat     |
| Complement component          | C1qbp        | ATP catabolic process;acetyl-CoA metabo            | catalytic activity;dihydropyridopyllysine-resid    | cell part;cytoplasmic part;intracellular membra    | Citrate cycle (TCA cycle);Lysine degradation        |
| ATP synthase subunit gamma    | Atp5c1       | cellular macromolecule metabolic process;cellu     | 3-hydroxy-2-methylbutyryl-CoA dehydrogenas         | cell part;cytoplasmic part;endoplasmic reticul     | Alzheimer's disease;Valine, leucine and isoleu      |
| Dihydropyridopyllysine-residu | Diat         | acetyl-CoA biosynthetic process;acetyl-CoA bios    | adenyl nucleotide binding;adenyl ribonucleotid     | cell part;cytoplasmic part;intracellular organell  | Citrate cycle (TCA cycle);Glycolysis / Gluconeogr   |
| 17beta-hydroxysteroid de      | Hsd17b10     | ATP catabolic process;ATP metabolic process;ca     | adenyl nucleotide binding;adenyl ribonucleotid     | cell part;cytoplasmic part;endoplasmic reticul     |                                                     |
| Dihydropyridopyllysine-residu | Diat         | acetyl-CoA catabolic process;acetyl-CoA metabo     | binding;catalytic activity;cation binding;coenz    | cell part;cytoplasmic part;intracellular membra    | Citrate cycle (TCA cycle)                           |
| Mitochondrial import rec      | Tomm70       | acute inflammatory response;acute inflammato       | endopeptidase inhibitor activity;endopeptidase     | cell part;cytoplasm;intracellular part             | Amoebiasis                                          |
| ATPase Asn1                   | Asn1         | ATP biosynthetic process;cellular biosynthetic     | structural constituent of ribosome;structural me   | cell part;intracellular organelle part;intracellu  | Ribosome                                            |
| Isocitrate dehydrogenase      | Ihd3a        | ATP biosynthetic process;ATP hydrolysis couple     | binding;catalytic activity;cofactor binding;kynu   | cell part;cytoplasmic part;intracellular organell  | Alzheimer's disease;Huntington's disease;Oxidat     |
| SP16                          | Serp1n9      | 2-oxoglutarate metabolic process;amine biosyn      | catalytic activity;cation transmembrane transpo    | cell part;cytoplasmic part;intracellular organell  | Alzheimer's disease;Cardiac muscle contraction;     |
| D-glutamate cyclase, mito     | Dglicy       | biological process;cellular biosynthetic proces    | adenyl nucleotide binding;adenyl ribonucleotid     | cell part;cytoplasm;intracellular membrane-bou     | Pantothenate and CoA biosynthesis                   |
| 60S ribosomal protein L17     | Rpl17        | ATP biosynthetic process;ATP hydrolysis couple     | active transmembrane transporter activity;aden     | cell part;cell surface;cytoplasmic part;intracellu | Alzheimer's disease;Huntington's disease;Oxidat     |
| ATP synthase subunit alfa     | Atp5a1       | 2-oxoglutarate metabolic process;amine biosyn      | catalytic activity;cofactor binding;kynu           | cell part;cell surface;coated pit;coated vesicle;  | ko05152;RNA degradation;Type 1 diabetes mellit      |
| Aspartate aminotransfera      | Got2         | ATP biosynthetic process;ATP metabolic proces      | ATPase activity;catalytic activity;cation transme  | cell part;cytoplasmic part;intracellular organell  | Alzheimer's disease;Huntington's disease;Oxidat     |
| Cytochrome c oxidase sub      | Cox7a2       | ATP biosynthetic process;ATP metabolic proces      | adenyl nucleotide binding;adenyl ribonucleotid     | cell part;cytoplasmic part;intracellular organell  | Calcium signaling pathway;Huntington's disease      |
| Bifunctional coenzyme A       | Coasy        | ATP biosynthetic process;ATP metabolic proces      | adenyl nucleotide binding;adenyl ribonucleotid     | cell part;cytoplasmic part;endoplasmic reticul     | Glycosylphosphatidylinositol(GPI)-anchor biosyn     |
| ATP synthase subunit beta     | Atp5b        | ATP biosynthetic process;ATP metabolic proces      | adenyl nucleotide binding;adenyl ribonucleotid     | cell part;cytoplasmic part;endoplasmic reticul     | Citrate cycle (TCA cycle)                           |
| 60 kDa heat shock protein     | Hspd1        | ATP biosynthetic process;ATP metabolic proces      | adenyl nucleotide binding;adenyl ribonucleotid     | cell part;cytoplasmic part;endoplasmic reticul     |                                                     |
| ATP synthase-coupling fact    | Atp5j        | ATP biosynthetic process;ATP metabolic proces      | adenyl nucleotide binding;adenyl ribonucleotid     | cell part;cytoplasmic part;endoplasmic reticul     |                                                     |
| ADP/ATP translocase 1         | Sic25a4      | apoptotic mitochondrial changes;biological reg     | transporter activity                               | cell part;cell projection;cilium;cytoplasmic part; |                                                     |
| GPI transamidase compo        | Pigs         | attachment of GPI anchor to protein;cellular m     | adrenogen binding;benzodiazepine receptor acti     | cell part;cytoplasmic part;endoplasmic reticul     | Neuroactive ligand-receptor interaction             |
| Translocator protein          | Tspo         | adrenal gland development;aging;anatomical st      | androgen binding;benzodiazepine receptor acti      | cell part;cytoplasmic part;integral to membrane    |                                                     |
| Lipase maturation factor      | Lmf2         | acetyl-CoA catabolic process;acetyl-CoA metabo     | catalytic activity;citrate (S)-synthase activi     | cell part;cytoplasmic part;intracellular membra    | Citrate cycle (TCA cycle);Glyoxylate and dicarbo    |
| Citrate synthase, mitoch      | Cs           | amine metabolic process;behavior;biological reg    | adenyl nucleotide binding;adenyl ribonucleotid     | cell part;cytoplasmic part;intracellular organell  | Alanine, aspartate and glutamate metabolism;A       |
| Glutamate dehydrogenase       | Glud1        | biological regulation;cellular process;chromoso    | transporter activity                               | cell part;cytoplasmic part;intracellular membra    | Calcium signaling pathway;Huntington's disease      |
| ADP/ATP translocase 2         | Sic25a5      | acetyl-CoA biosynthetic process;acetyl-CoA bios    | catalytic activity;oxidoreductase activity;oxid    | cell part;cytoplasmic part;intracellular membra    | Butanoate metabolism;Citrate cycle (TCA cycle)      |
| Pyruvate dehydrogenase        | Pdh1a        | cellular metabolic process;cellular process;elect  | binding;catalytic activity;coenzyme binding;cofa   | cell part;cytoplasmic part;integral to membrane    |                                                     |
| NAD(P) transhydrogenase       | Nnt          | ATP biosynthetic process;ATP metabolic proces      | ATPase activity;catalytic activity;cation transme  | cell part;cytoplasmic part;integral to membrane    | Alzheimer's disease;Huntington's disease;Oxidat     |
| ATP synthase protein 8        | Mtadp8       | anatomical structure morphogenesis;biological      | binding;catalytic activity;coenzyme binding;cofa   | cell part;cytoplasm;cytoskeletal part;intracellu   | Alzheimer's disease;Huntington's disease;Oxidat     |
| Dihydropyridopyl dehydro      | Diat         | cellular component assembly;cellular compon        | binding;catalytic activity;GTP binding;GTPase ac   | cell part;cytoplasmic part;integral to membrane    | Alzheimer's disease;Cardiac muscle contraction;     |
| Tubulin alpha chain (Frag     | Tuba4a       | amine biosynthetic process;amine metabolic pr      | binding;catalytic activity;cofactor binding;ornit  | cell part;cytoplasmic part;intracellular membra    | Arginine and proline metabolism                     |
| Cytochrome c oxidase sub      | Cox7c        | anatomical structure development;anatomical s      | cellular metabolic process;cellular process;elect  | cell part;cytoplasmic part;intracellular organell  | Alzheimer's disease;Huntington's disease;Oxidat     |
| Ornithine aminotransfera      | Oat          | cellular process;endosome transport;establis       | anatomical structure development;apoptosis;bil     | cell part;cytoplasmic part;early endosome;earl     | N-Glycan biosynthesis;Protein processing in end     |
| Prohibitin-2;Prohibitin-2     | Phb2         | ATP biosynthetic process;ATP metabolic proces      | binding;cation transmembrane transporter activ     | cell part;cytoplasmic part;intracellular membra    | Alzheimer's disease;Cardiac muscle contraction;     |
| Cytochrome c oxidase sub      | Ndufa4       | ATP biosynthetic process;ATP metabolic proces      | adenyl nucleotide binding;adenyl ribonucleotid     | cell part;cytoplasmic part;intracellular membra    | Alzheimer's disease;Huntington's disease;Oxidat     |
| WASH complex subunit 2        | Washc2       | cellular macromolecule metabolic process;cellu     | cation transmembrane transporter activity;hydr     | cell part;cytoplasmic part;intracellular organell  | Alzheimer's disease;Huntington's disease;Oxidat     |
| Dolichyl-diphosphooligos      | Dad1         | ATP hydrolysis coupled proton transport;biologi    | adenyl nucleotide binding;adenyl ribonucleotid     | cell part;cytoplasmic part;intracellular membra    | Alzheimer's disease;Huntington's disease;Oxidat     |
| Cytochrome b-c1 complex       | Uqc10        | ATP biosynthetic process;ATP metabolic proces      | cation transmembrane transporter activity;hydr     | cell part;cytoplasmic part;intracellular organell  | Alzheimer's disease;Huntington's disease;Oxidat     |
| ATP synthase subunit o        | Atp5o        | ATP biosynthetic process;ATP metabolic proces      | adenyl nucleotide binding;adenyl-nucleotide ex     | cell part;cytoplasmic part;intracellular membra    | Collecting duct acid secretion;Epithelial cell sign |
| 10 kDa heat shock protein     | Hspe1        | cellular macromolecule metabolic process;cellu     | active transmembrane transporter activity;ATP      | apical part of cell;cell part;cytoplasmic part;cy  | Collecting duct acid secretion;Epithelial cell sign |
| ATP synthase subunit d        | Gm10250;Atp5 | ATP hydrolysis coupled proton transport;cat        | anatomical structure formation involved in mor     | binding;cation binding;copper ion binding;extra    |                                                     |
| Grip E protein homolog 1      | Grip1        | ATP hydrolysis coupled proton transport;cat        | binding;cation binding;nucleic acid binding;nuclei | cell part;cytoplasmic part;integral to membrane    |                                                     |
| V-type proton ATPase sub      | Atp6v1c1     | ATP hydrolysis coupled proton transport;cat        | adenyl nucleotide binding;adenyl ribonucleotid     | cell part;cytoplasmic part;integral to membrane    |                                                     |
| Glypican-1                    | Gpc1         | adaptive immune response;adaptive immune re        | binding;DNA binding;nucleic acid binding;nuclei    | cell part;chromatoid body;cytoplasm;cytoplasm      | Apoptosis;Cytokine-cytokine receptor interacti      |
| Nuclear factor NF-kappa-      | Nfkb2        | cell cycle;cell division;cellular process          | catalytic activity;L-malate dehydrogenase activ    | cell part;cytoplasm;intracellular part             | Collecting duct acid secretion;Epithelial cell sign |
| Clin division cycle protein   | Cdc123       | acetyl-CoA catabolic process;acetyl-CoA metabo     | aspartic-type endopeptidase activity;aspartic-ty   | cell part;cytoplasmic membrane-bounded vesic       | Carbon fixation in photosynthetic organisms;Citi    |
| Malate dehydrogenase, m       | Mdh2         | autophagic vacuole assembly;cellular compon        | cation transmembrane transporter activity;div      | cell part;cytoplasmic part;endoplasmic reticul     | ko05152;Lysosome                                    |
| Cathepsin D;Uncharacteri      | Ctsd         | biological regulation;cation homeostasis;cation    | adenyl nucleotide binding;adenyl ribonucleotid     | cell part;cytoplasmic part;integral to membrane    |                                                     |
| Solute carrier family 39 (Z   | Sic39a14     | biological regulation;biosynthetic process;cellu   | adenyl nucleotide binding;adenyl ribonucleotid     | cell part;cytoplasmic part;integral to membrane    |                                                     |
| ATPase family AAA domai       | Atad3        | anatomical structure development;biological r      | adenyl nucleotide binding;adenyl ribonucleotid     | cell part;cytoplasmic part;integral to membrane    |                                                     |
| Prohibitin;Prohibitin (Frag   | Phb          | apoptosis;apoptosis in response to endoplasm       | active transmembrane transporter activity;ATP      | cell part;integral to membrane;intrinsic to mem    |                                                     |
| ATP-dependent RNA helic       | Ddx19a;Ddx15 | ATP hydrolysis coupled proton transport;biologi    | binding;cation binding;ion binding;ligand-depen    | cell part;intracellular non-membrane-bounded c     |                                                     |
| Tumor necrosis factor rec     | Tnfrsf10b    | biological regulation;biosynthetic process;cellu   | binding;cation binding;extracellular matrix struc  | cell part;cytoplasm;cytoplasmic part;intracellu    | Amoebiasis;ECM-receptor interaction;Focal adh       |
| V-type proton ATPase pro      | Atp6v0c      | amine biosynthetic process;amine metabolic pr      | catalytic activity;oxidoreductase activity;oxid    | cell part;cytoplasm;cytoplasmic part;intracellu    | Arginine and proline metabolism                     |
| MCC6382, isoform CRA_d        | Gm21992;Rbn  | cellular component assembly;cellular compon        | catalytic activity;cation transmembrane transpo    | cell part;cytoplasmic part;integral to membrane    | Alzheimer's disease;Cardiac muscle contraction;     |
| Collagen alpha-1(I) chain     | Col2a1       | biological regulation;cell communication;cell re   | catalytic activity;disulfide oxidoreductase activ  | cell body;cell part;cell projection;cytoplasmic    |                                                     |
| Pyrolyne-5-carboxylate re     | Pfycr2       | establishment of localization;establishment of p   | binding;ribonucleoprotein binding;ribosome bin     | cell part;cytoplasmic part;cytoplasmic vesicle m   | Phagosome;Protein export;Protein processing in      |
| Cytochrome c oxidase sub      | Cox6a1       | acetyl-CoA catabolic process;acetyl-CoA metabo     | adrenyl-thiolase activity;adenyl nucleotide bind   | cell part;cytoplasmic part;intracellular membra    | Citrate cycle (TCA cycle);Propanoate metabolism     |
| ER membrane protein com       | Emc1         | biological regulation;positive regulation of biolo | binding;DNA binding;ligand-dependent nuclear       | cell part;cytoplasmic part;cytosol;integral to me  |                                                     |
| Thioredoxin, mitochondri      | Txn2         | adipose tissue development;anatomical structu      | catalytic activity;cation transmembrane transpo    | cell part;cytoplasmic part;integral to membrane    | Alzheimer's disease;Cardiac muscle contraction;     |
| Protein transport protein     | Sec61a1      | cellular component assembly;cellular compon        | acyl-CoA hydrolase activity;catalytic activi       | cell part;cytoplasmic part;intracellular membra    | mRNA surveillance pathway;RNA degradation;R         |
| Succinate--CoA ligase [AD     | Sucfa2       | cellular process;establishment of localization;tr  | adenyl nucleotide binding;adenyl ribonucleotid     | cell part;integral to membrane;intrinsic to mem    | Citrate cycle (TCA cycle)                           |
| Glycosylated lysosomal m      | Glimp        | biological regulation;cellular process;establis    | binding;ER retention sequence binding;peptide      | cell part;cytoplasmic part;endoplasmic reticul     | Vibrio cholerae infection                           |
| Cytochrome c oxidase sub      | Cox6c        | cellular metabolic process;cellular process;elect  | binding;catalytic activity;GTP binding;GTPase ac   | cell part;cytoplasmic part;intracellular organell  | Plant-pathogen interaction                          |
| Succinyl-CoA:3-ketoacid c     | Oxct1        | biological regulation;cation homeostasis;cation    | binding;catalytic activity;cation binding;ferri    | cell part;cytoplasmic part;intracellular membra    | Mineral absorption;Porphyrin and chlorophyll m      |
| Polyadenylate-binding pr      | Pabpc4;Pab   | cellular metabolic process;cellular process;elect  | binding;catalytic activity;cation binding;endop    | cell part;cytoplasmic part;intracellular organell  | Alzheimer's disease;Cardiac muscle contraction;     |
| Acyl-coenzyme A thioeste      | Acot13       | alcohol biosynthetic process;alcohol metabolic     | adenyl nucleotide binding;adenyl ribonucleotid     | cell part;cytoplasmic part;intracellular organell  | Citrate cycle (TCA cycle);Pyruvate metabolism       |
| Solute carrier family 12 m    | Sic12a9      | establishment of localization;transport            | biological regulation;biosynthetic process;cellu   | cell part;cytoplasmic part;endoplasmic reticul     | Glycerophospholipid metabolism                      |
| Isocitrate dehydrogenase      | Ihd3g        | biological regulation;biosynthetic process;cellu   | 1-acylglycerophosphocholine O-acyltransferase      | cell part;cytoplasm;histone methyltransferase c    |                                                     |
| ER lumen protein-retaini      | Kdel3        | biological regulation;cation homeostasis;cation    | adenyl nucleotide binding;adenyl ribonucleotid     | cell part;cytoplasm;histone methyltransferase c    |                                                     |
| Elongation factor Tu, mito    | Tufm         | cellular metabolic process;cellular process;elect  | adenyl nucleotide binding;adenyl ribonucleotid     | cell part;cytoplasm;histone methyltransferase c    |                                                     |
| Ferritin heavy chain          | Fth1         | alcohol biosynthetic process;alcohol metabolic     | adenyl nucleotide binding;adenyl ribonucleotid     | cell part;cytoplasm;histone methyltransferase c    |                                                     |
| Cytochrome b-c1 complex       | Uqcrc2       | establishment of localization;transport            | biological regulation;biosynthetic process;cellu   | cell part;cytoplasm;histone methyltransferase c    |                                                     |
| Pyruvate carboxylase;Pyr      | Pcx;Pc       | biological regulation;biosynthetic process;cellu   | biological regulation;biosynthetic process;cellu   | cell part;cytoplasm;histone methyltransferase c    |                                                     |
| Mitochondrial carrier hon     | Mtch2        | biological regulation;biosynthetic process;cellu   | biological regulation;biosynthetic process;cellu   | cell part;cytoplasm;histone methyltransferase c    |                                                     |
| Lysophospholipid acyltran     | Lpcat3       | biological regulation;biosynthetic process;cellu   | biological regulation;biosynthetic process;cellu   | cell part;cytoplasm;histone methyltransferase c    |                                                     |
| Proline-, glutamic acid-an    | Pelp1        | biological regulation;biosynthetic process;cellu   | biological regulation;biosynthetic process;cellu   | cell part;cytoplasm;histone methyltransferase c    |                                                     |

|                                               |               |                                                                                   |                                                                              |                                                                            |                                                                      |
|-----------------------------------------------|---------------|-----------------------------------------------------------------------------------|------------------------------------------------------------------------------|----------------------------------------------------------------------------|----------------------------------------------------------------------|
| ATP-dependent Clp protease                    | Clpp          | macromolecule metabolic process; metabolic process                                | adenyl nucleotide binding; adenyl ribonucleotide binding                     | cell part; cytoplasmic part; intracellular membrane                        | Cell cycle - Caulobacter                                             |
| Calcium-binding mitochondrial protein         | Slc25a13      | ATP biosynthetic process; ATP metabolic process                                   | acidic amino acid transmembrane transporter activity                         | cell part; cytoplasmic part; integral to membrane                          |                                                                      |
| Tubulointerstitial nephritis                  | Tinag1        | immune response; immune system process; macrophage activation                     | binding; carbohydrate binding; cargo receptor activity                       | cell part; cytoplasm; extracellular matrix; extracellular region           |                                                                      |
| Peptidyl-tRNA hydrolase                       | Pthr2         | biological regulation; negative regulation of anion transport                     | aminoacyl-tRNA hydrolase activity; carboxylic ester hydrolase activity       | cell part; cytoplasmic part; cytosol; intracellular membrane               |                                                                      |
| Ribosome biogenesis protein                   | Brix1         | cellular component biogenesis; cellular component assembly                        |                                                                              | cell part; intracellular non-membrane-bounded organelle                    |                                                                      |
| Mitochondrial processing peptidase            | Pmpca         | macromolecule metabolic process; metabolic process                                | binding; catalytic activity; cation binding; endopeptidase activity          | cell part; cytoplasmic part; intracellular membrane                        |                                                                      |
| Cytochrome b-c1 complex                       | Uqcrc1        | cellular metabolic process; cellular process; electron transport chain            | binding; catalytic activity; cation binding; ion binding                     | cell part; cytoplasmic part; intracellular organelle                       | Alzheimer's disease; Cardiac muscle contraction;                     |
| tRNA (cytosine(34)-C(5))-ribosyltransferase   | Nsun2         | cell cycle phase; cell cycle process; cell division; cell cycle arrest            | binding; catalytic activity; methyltransferase activity                      | cell part; cytoplasm; cytoskeletal part; intracellular organelle           |                                                                      |
| NADH dehydrogenase [ubiquinone]               | Ndufa9        | cellular metabolic process; cellular process; electron transport chain            |                                                                              | cell part; cytoplasmic part; intracellular organelle                       | Alzheimer's disease; Huntington's disease; Oxidative phosphorylation |
| Sodium-coupled neutral amino acid transporter | Slc38a2       | cation transport; establishment of localization; ion transport                    | active transmembrane transporter activity; amino acid transporter activity   | cell part; integral to membrane; intrinsic to membrane                     | Protein digestion and absorption                                     |
| Fibronectin                                   | Fn1           | biological adhesion; calcium-independent cell-matrix adhesion                     | enzyme activator activity; enzyme regulator activity                         | apical plasma membrane; basement membrane; cell part                       | Amoebiasis; Bacterial invasion of epithelial cells;                  |
| ATP synthase subunit g                        | Atp5f1        | ATP biosynthetic process; ATP metabolic process                                   | cation transmembrane transporter activity; hydrolase activity                | cell part; cytoplasmic part; intracellular organelle                       | Oxidative phosphorylation                                            |
| Vesicle transport protein                     | Golt1b        | biological regulation; cellular process; establishment of localization            | molecular transducer activity; signal transducer activity                    | cell part; cytoplasmic part; endoplasmic reticulum                         |                                                                      |
| Serum paraoxonase/arylesterase                | Pon2          | aromatic compound catabolic process; catabolic process                            | arylesterase activity; binding; carboxylic ester hydrolase activity          | cell part; cytoplasmic part; extracellular region; intracellular organelle |                                                                      |
| Protein RRP5 homolog                          | Pdc11         | apoptosis; biological regulation; cell death; cellular component organization     | binding; nucleic acid binding; RNA binding                                   | cell part; cytoplasmic part; cytosol; intracellular membrane               | Aminobenzoate degradation; Bisphenol degradation                     |
| Sorting and assembly macromolecule            | Samm50        | cellular component organization; cellular component assembly                      |                                                                              | cell part; cytoplasmic part; integral to membrane                          |                                                                      |
| Leucine-rich PPR motif-coiled-coil protein    | Lrppc         | biological regulation; biosynthetic process; cellular component organization      | beta-tubulin binding; binding; cytoskeletal protein binding                  | cell part; chromosome; condensed chromosome; cytoskeleton                  |                                                                      |
| Cytochrome c oxidase subunit 4                | Cox4i1        |                                                                                   | catalytic activity; cation transmembrane transporter activity                | cell part; cytoplasmic part; intracellular organelle                       | Alzheimer's disease; Cardiac muscle contraction;                     |
| Cytochrome c oxidase subunit 5a               | Cox5a         |                                                                                   | binding; catalytic activity; cation binding; cation transport                | cell part; cytoplasmic part; intracellular organelle                       | Alzheimer's disease; Cardiac muscle contraction;                     |
| Cortactin, isoform CRA_a                      | Cttn          |                                                                                   |                                                                              | cell cortex; cell part; cell projection; cell projection; cell part        | Bacterial invasion of epithelial cells; Pathogenic infection         |
| Kinesin-like protein KIF23                    | Kif23         | cell cycle process; cellular component assembly; anatomical structure development | adenyl nucleotide binding; adenyl ribonucleotide binding                     | cell part; centralspindlin complex; centrosome; cytoskeleton               |                                                                      |
| Copine-8                                      | Cpne8         |                                                                                   |                                                                              |                                                                            |                                                                      |
| Syndecan-4                                    | Sdc4          | anatomical structure development; biological regulation                           | molecular transducer activity; receptor activity; signal transducer activity | adherens junction; anchoring junction; cell junction                       | Cell adhesion molecules (CAMs); ECM-receptor interaction             |
| Rac GTPase-activating protein                 | Racgap1       | actin cytoskeleton organization; actin filament-based process                     | alpha-tubulin binding; beta-tubulin binding; binding                         | acrosomal vesicle; cell division site part; cell part                      |                                                                      |
| MLV-related proviral envelope protein         | Env           | reproductive process; viral infectious cycle; viral replication                   | binding; cation binding; ion binding; metal ion binding                      | cell part; integral to membrane; intrinsic to membrane                     |                                                                      |
| Glucosamine-6-phosphatase                     | Gnpda1        | acrosome reaction; alcohol biosynthetic process; alcohol catabolic process        | catalytic activity; deaminase activity; glucosaminidase activity             | cell part; cytoplasm; intracellular part                                   | Amino sugar and nucleotide sugar metabolism                          |
| Amine oxidase [flavin-cofactor]               | Maoa          | alcohol catabolic process; alcohol metabolic process                              | catalytic activity; oxidoreductase activity                                  | cell part; cytoplasmic part; integral to membrane                          | Arginine and proline metabolism; Drug metabolism                     |
| Cytochrome c1, heme protein                   | Cyc1          | cellular metabolic process; cellular process; electron transport chain            | binding; cation binding; electron carrier activity; iron binding             | cell junction; cell part; cytoplasmic part; integral to membrane           | Alzheimer's disease; Cardiac muscle contraction;                     |
| Cytochrome c oxidase subunit 1                | Gm11273; Cox1 |                                                                                   | binding; catalytic activity; cation binding; cation transport                | cell part; cytoplasmic part; envelope; intracellular membrane              | Alzheimer's disease; Cardiac muscle contraction;                     |
| Neuroblastoma-amplified protein               | Nbas          |                                                                                   |                                                                              |                                                                            |                                                                      |
| Kinesin-like protein KIF14                    | Kif14         | cellular component movement; cellular process                                     | adenyl nucleotide binding; adenyl ribonucleotide binding                     | cell part; cytoskeletal part; intracellular organelle                      |                                                                      |
| Lysyl oxidase homolog 4                       | Lox4          |                                                                                   | binding; cargo receptor activity; catalytic activity                         | cell part; extracellular region; extracellular region                      |                                                                      |
| Glutaminase kidney isoform                    | Gls           | amine biosynthetic process; amine catabolic process                               | catalytic activity; glutaminase activity; hydrolase activity                 | cell part; cytoplasmic part; cytosol; intracellular membrane               | Alanine, aspartate and glutamate metabolism; Autophagy               |
| Microtubule-associated protein 1k             | Map1k3b       | autophagy; catabolic process; cellular catabolic process                          |                                                                              | autophagic vacuole; autophagic vacuole membrane                            |                                                                      |
| Cytochrome b-c1 complex                       | Uqcrcr        | cellular component assembly; cellular component organization                      | catalytic activity; cation transmembrane transporter activity                | cell part; cytoplasmic part; intracellular organelle                       | Alzheimer's disease; Cardiac muscle contraction;                     |
| Mitochondrial import receptor                 | Tomm40        | cellular process; establishment of localization; establishment of localization    | channel activity; passive transmembrane transporter activity                 | cell part; cytoplasmic part; integral to membrane                          | Amyotrophic lateral sclerosis (ALS)                                  |
| Sequestosome-1                                | Sqstm1        | apoptosis; autophagy; biological regulation; catabolic process                    | binding; cation binding; enzyme binding; identical binding                   | aggresome; autophagic vacuole; cell part; cytoplasmic part                 | Osteoclast differentiation                                           |
| Lipid droplet-associated histone H1           | Ldah          |                                                                                   |                                                                              |                                                                            |                                                                      |
| TBC1 domain family member                     | Tbc1d15       |                                                                                   | enzyme activator activity; enzyme regulator activity                         | cell part; cytoplasmic part; extracellular region; integral to membrane    |                                                                      |
| Importin subunit alpha-1                      | Kpna2         | establishment of localization; establishment of localization                      | protein transporter activity; substrate-specific transport                   | cell part; cytoplasm; intracellular membrane-bound organelle               |                                                                      |
| Apolipoprotein A1                             | Apol1a; Apol1 | cellular macromolecule metabolic process; cellular component organization         | binding; lipid binding                                                       | extracellular region                                                       |                                                                      |

Supplemental table 3: Student's T-test between PyMT Control and PyMT RT

| LQF Intensity<br>PYMT Control1 | LQF Intensity<br>PYMT Control2 | LQF Intensity<br>PYMT Control3 | LQF Intensity<br>PYMT RT1 | LQF Intensity<br>PYMT RT2 | LQF Intensity<br>PYMT RT3 | -Log t-test p value<br>PYMT Control vs RT | t-test Difference<br>PYMT Control vs RT | Cluster                | Protein IDs      | Majority<br>protein IDs |
|--------------------------------|--------------------------------|--------------------------------|---------------------------|---------------------------|---------------------------|-------------------------------------------|-----------------------------------------|------------------------|------------------|-------------------------|
| 28.12139                       | 29.96774                       | 29.104                         | 24.70767                  | 26.14686                  | 26.30487                  | 1.979008172                               | -3.344577789                            | Higher in PyMT Control | Q9CY64;A2AS8B;A2 | Q9CY64                  |
| 31.29789                       | 31.22504                       | 31.51089                       | 27.60399                  | 28.14102                  | 28.27142                  | 3.947404622                               | -3.339127223                            | Higher in PyMT Control | P97298;B7C2C5;F6 | P97298                  |
| 26.38772                       | 25.67303                       | 27.07112                       | 23.06579                  | 23.15653                  | 23.17798                  | 2.735926848                               | -3.123858134                            | Higher in PyMT Control | E9Q810;P06909;D6 | E9Q810;P06909;D6        |
| 26.99766                       | 25.98251                       | 26.45356                       | 23.94056                  | 24.23169                  | 23.71816                  | 2.803659625                               | -2.514437358                            | Higher in PyMT Control | MOQWP1;24YK85;A  | MOQWP1;24YK85;A         |
| 24.08537                       | 22.89874                       | 21.83461                       | 20.47754                  | 20.68859                  | NaN                       | 1.16688226                                | -2.356508573                            | Higher in PyMT Control | F8WH23;E9Q5D9;Q  | F8WH23;E9Q5D9;Q         |
| 24.98033                       | 24.14102                       | 24.67573                       | NaN                       | 22.58233                  | 24.26762                  | 2.12926211                                | -2.074049632                            | Higher in PyMT Control | P43275           | P43275                  |
| 25.73892                       | 25.1332                        | 24.84805                       | 23.03758                  | 22.94414                  | 23.55215                  | 2.507115294                               | -2.062098821                            | Higher in PyMT Control | O09159           | O09159                  |
| 25.19084                       | 24.56964                       | 25.391                         | 23.09507                  | 22.93157                  | NaN                       | 2.086430946                               | -2.037177086                            | Higher in PyMT Control | Q92111;D3YYR8    | Q92111                  |
| 25.32732                       | NaN                            | 26.37451                       | 24.37119                  | 23.86703                  | 23.20508                  | 1.397549321                               | -2.036479314                            | Higher in PyMT Control | Q02257           | Q02257                  |
| 25.57831                       | 25.59833                       | 25.83123                       | 23.75939                  | 23.85757                  | 23.36453                  | 3.520822866                               | -2.008792241                            | Higher in PyMT Control | Q922H4;D3Z3L0;D3 | Q922H4                  |
| 29.13369                       | 28.74535                       | 29.48999                       | 27.39917                  | 27.07112                  | 27.38278                  | 2.80641957                                | -1.838652929                            | Higher in PyMT Control | E9Q035;P47758;F7 | E9Q035                  |
| 29.23306                       | 28.97596                       | 29.13614                       | 27.58978                  | 27.07112                  | 27.1795                   | 3.331600956                               | -1.834923426                            | Higher in PyMT Control | Q9QUOR           | Q9QUOR                  |
| 26.73892                       | 26.38607                       | 26.71293                       | 25.33074                  | NaN                       | 24.33074                  | 1.675314645                               | -1.781902313                            | Higher in PyMT Control | Q9WUJ7           | Q9WUJ7                  |
| 24.20955                       | 24.42982                       | 25.64581                       | 22.75328                  | 22.68859                  | 23.50446                  | 1.579193116                               | -1.779619853                            | Higher in PyMT Control | Q7TNC4;E9Q715;Q  | Q7TNC4;E9Q715;Q         |
| 26.19272                       | 26.86231                       | 26.57542                       | 24.7543                   | 25.08942                  | 24.84805                  | 2.143201543                               | -1.646229426                            | Higher in PyMT Control | P12399;A0A286YD  | P12399;A0A286YD         |
| 31.80039                       | 31.80009                       | 31.80039                       | 30.12386                  | 30.21928                  | 30.18423                  | 6.280760193                               | -1.627163569                            | Higher in PyMT Control | P06797;A0A1V7VN  | P06797;A0A1V7VN         |
| 24.66492                       | NaN                            | 24.5285                        | NaN                       | 23.32389                  | 22.94949                  | 1.741903791                               | -1.460024834                            | Higher in PyMT Control | P14094;A0A06YX0  | P14094;A0A06YX0         |
| 25.09748                       | 25.27498                       | 25.08132                       | 23.83846                  | 25.7542                   | NaN                       | 2.840269096                               | -1.444316228                            | Higher in PyMT Control | Q9ESY9           | Q9ESY9                  |
| 26.85043                       | 26.99766                       | 26.78955                       | 25.73635                  | 25.32389                  | 25.28912                  | 3.099943172                               | -1.429428736                            | Higher in PyMT Control | P43277;7HFT9;Q07 | P43277                  |
| 26.72598                       | 27.1795                        | 27.2535                        | 26.0296                   | 25.60116                  | 25.24264                  | 2.1513055                                 | -1.42852656                             | Higher in PyMT Control | P17095           | P17095                  |
| 25.75175                       | 25.11744                       | 25.38113                       | 24.2535                   | 24.11744                  | 23.60964                  | 2.214301543                               | -1.423247019                            | Higher in PyMT Control | Q88GZ6;P51569;A2 | Q88GZ6;P51569           |
| 24.78955                       | 25.1946                        | 25.00196                       | 23.31008                  | NaN                       | 23.84805                  | 1.958029909                               | -1.416307767                            | Higher in PyMT Control | Q3TSAB;Q8K021;D3 | Q3TSAB;Q8K021;D3        |
| 28.97869                       | 30.36202                       | 30.40324                       | 28.41135                  | 28.61456                  | 28.509                    | 1.387320775                               | -1.403016408                            | Higher in PyMT Control | Q4LFA9           | Q4LFA9                  |
| 27.33245                       | 27.3662                        | 27.29789                       | 26.40406                  | 25.59263                  | 25.84086                  | 2.344985299                               | -1.386327744                            | Higher in PyMT Control | P07141;D3Z090;D3 | P07141;D3Z090           |
| 25.73635                       | 25.29614                       | 25.44253                       | 23.58692                  | 23.589504                 | 23.89504                  | 1.556270295                               | -1.375341415                            | Higher in PyMT Control | Q3TBA3;P21958;F6 | Q3TBA3;P21958           |
| 25.44884                       | 25.01478                       | 25.53742                       | 24.08537                  | NaN                       | 23.83846                  | 2.06375449                                | -1.371764819                            | Higher in PyMT Control | P09EX5;B7ZCL7;F6 | P09EX5;B7ZCL7           |
| 32.67766                       | 32.75334                       | 32.81                          | 31.51559                  | 31.36202                  | 31.36202                  | 4.505391367                               | -1.333791097                            | Higher in PyMT Control | P12399;F8WIP8;D3 | P12399;F8WIP8;D3        |
| 28.7162                        | 28.78644                       | 28.65949                       | 27.3662                   | 27.15653                  | 27.2803                   | 4.158469462                               | -1.333034515                            | Higher in PyMT Control | P43276           | P43276                  |
| 30.40324                       | 30.38278                       | 30.91171                       | 29.25575                  | 29.06856                  | 29.39917                  | 2.588120991                               | -1.324750264                            | Higher in PyMT Control | P01887           | P01887                  |
| 26.33245                       | 26.27853                       | 26.30835                       | 25.29263                  | 24.5285                   | 25.20955                  | 2.228442429                               | -1.296209335                            | Higher in PyMT Control | Q8BL97           | Q8BL97                  |
| 29.62506                       | 29.52962                       | 29.47846                       | 28.76129                  | 28.06805                  | 28.04531                  | 2.195038447                               | -1.255228043                            | Higher in PyMT Control | Q61391;A0A0A6Y9  | Q61391                  |
| 24.10149                       | 25.02749                       | 24.21697                       | 23.77957                  | 22.9566                   | 22.9566                   | 1.411672976                               | -1.251374563                            | Higher in PyMT Control | H3BKNO;Q1HFZ0    | H3BKNO;Q1HFZ0           |
| 29.05051                       | 28.95394                       | 29.12139                       | 27.78332                  | 27.80809                  | 27.78332                  | 4.846552845                               | -1.250372569                            | Higher in PyMT Control | P21460;A2APX3    | P21460;A2APX3           |
| 24.23169                       | 23.95837                       | 24.49838                       | 22.73892                  | 23.02242                  | 23.19009                  | 2.438440466                               | -1.245669683                            | Higher in PyMT Control | F8WH10;E9Q4N8;F8 | F8WH10;E9Q4N8;F8        |
| 26.63201                       | 26.24989                       | 26.05258                       | 25.23169                  | 25.5285                   | 24.44253                  | 1.563760399                               | -1.243917465                            | Higher in PyMT Control | Q9CZ75           | Q9CZ75                  |
| 28.88867                       | 29.13614                       | 28.85638                       | 27.79576                  | 27.78955                  | 27.5969                   | 3.444998778                               | -1.232993444                            | Higher in PyMT Control | Q5EPB8;P49312    | Q5EPB8;P49312           |
| 32.3802                        | 32.51559                       | 32.33565                       | 31.33565                  | 31.31419                  | 30.96086                  | 3.08733757                                | -1.206914902                            | Higher in PyMT Control | P68433           | P68433                  |
| 25.24989                       | 25.71816                       | 25.56384                       | 24.1332                   | 24.17188                  | 24.61526                  | 2.36047199                                | -1.203845978                            | Higher in PyMT Control | P50428;F6QGM0    | P50428                  |
| 25.27853                       | 24.91342                       | 25.2856                        | 24.27498                  | NaN                       | 24.65406                  | 1.624270996                               | -1.194676399                            | Higher in PyMT Control | P97310           | P97310                  |
| 25.92025                       | 25.79452                       | 25.71555                       | 24.92705                  | 24.32389                  | 24.63755                  | 2.517527221                               | -1.180610657                            | Higher in PyMT Control | O88968           | O88968                  |
| 25.17188                       | 25.45513                       | 25.37119                       | 24.49228                  | 24.44253                  | 23.55215                  | 1.679269659                               | -1.170412064                            | Higher in PyMT Control | A0A0A0M0Q76;Q6D  | A0A0A0M0Q76;Q6D         |
| 25.02749                       | 25.56674                       | 24.78457                       | 23.79947                  | 23.82881                  | 24.2535                   | 1.883060421                               | -1.165676753                            | Higher in PyMT Control | Q00P19           | Q00P19                  |
| 31.17831                       | 31.24218                       | 31.22504                       | 30.02168                  | 30.07368                  | 30.07368                  | 5.834133316                               | -1.158833186                            | Higher in PyMT Control | P10605           | P10605                  |
| 24.43619                       | 24.72858                       | 24.26257                       | NaN                       | 23.33756                  | 23.31008                  | 2.096683558                               | -1.146525701                            | Higher in PyMT Control | P84089;A0A1W2P7  | P84089;A0A1W2P7         |
| 32.91266                       | 29.23763                       | 29.14346                       | 28.16039                  | 27.99766                  | 28.0296                   | 4.418519532                               | -1.136033376                            | Higher in PyMT Control | P43274           | P43274                  |
| 33.21928                       | 33.30331                       | 33.13155                       | 32.16039                  | 32.11448                  | 32.04466                  | 4.13796141                                | -1.121537526                            | Higher in PyMT Control | Q6ZWY9;Q64525;Q  | Q6ZWY9;Q64525;Q         |
| 33.21928                       | 33.30334                       | 33.24785                       | 32.20186                  | 32.0927                   | 32.11148                  | 4.941672453                               | -1.121477763                            | Higher in PyMT Control | A0A0N45V66;Q8R1  | A0A0N45V66;Q8R1         |
| 29.1712                        | 29.13614                       | 28.87115                       | 27.72598                  | 28.14589                  | 27.95947                  | 2.710071765                               | -1.117687225                            | Higher in PyMT Control | O88569;A0A0N4S4  | O88569;A0A0N4S4         |
| 28.51277                       | 28.5969                        | 27.70636                       | 27.15074                  | 27.01903                  | 27.34942                  | 1.668692687                               | -1.098946889                            | Higher in PyMT Control | Q64449;A2AAA9    | Q64449;A2AAA9           |
| 27.3662                        | 27.2803                        | 27.2803                        | 26.40243                  | 26.03171                  | 26.20769                  | 3.22998325                                | -1.094986599                            | Higher in PyMT Control | P19788           | P19788                  |
| 33.49429                       | 33.51794                       | 33.50616                       | 32.44085                  | 32.43589                  | 32.35941                  | 5.639693939                               | -1.094081879                            | Higher in PyMT Control | P62806           | P62806                  |
| 28.22159                       | 28.28912                       | 28.29351                       | 27.43936                  | 27.16039                  | 26.93157                  | 2.736256517                               | -1.090967178                            | Higher in PyMT Control | Q3THW5;P0C056;Q  | Q3THW5;P0C056;Q         |
| 30.47267                       | 30.52962                       | 30.4919                        | 29.3869                   | 29.47267                  | 29.36828                  | 1.536210477                               | -1.088781993                            | Higher in PyMT Control | P15864           | P15864                  |
| 27.81421                       | 27.71293                       | 27.74535                       | 26.61807                  | 26.71293                  | 26.69975                  | 4.863946818                               | -1.080579758                            | Higher in PyMT Control | O35988           | O35988                  |
| 26.63201                       | 26.48616                       | 26.43141                       | 26.69179                  | 25.43301                  | 25.21327                  | 2.68314164                                | -1.070505142                            | Higher in PyMT Control | Q8VI16           | Q8VI16                  |
| 23.75939                       | 23.74919                       | 23.92252                       | 22.63423                  | 22.94771                  | 22.64306                  | 3.093332461                               | -1.068702062                            | Higher in PyMT Control | O35188;A0A1D5RM  | O35188                  |
| 27.50142                       | 27.3662                        | 27.61105                       | 26.21512                  | 26.56674                  | 26.51202                  | 2.909861976                               | -1.061597188                            | Higher in PyMT Control | Q92083;Q9EQU5;A1 | Q92083                  |
| 25.97815                       | 26.30661                       | 25.89504                       | 25.04009                  | 25.98423                  | 25.01478                  | 2.928942366                               | -1.055518468                            | Higher in PyMT Control | A2BLB8           | A2BLB8                  |
| 25.86467                       | 25.71816                       | 25.63755                       | 24.417                    | 24.55215                  | 25.08942                  | 2.0891465                                 | -1.05393664                             | Higher in PyMT Control | Q9JL26           | Q9JL26                  |
| 24.37782                       | 24.05258                       | 24.1332                        | 23.32389                  | NaN                       | 22.95127                  | 1.948053965                               | -1.050291061                            | Higher in PyMT Control | Q9Z1N5;G3UXI6    | Q9Z1N5                  |
| 26.55362                       | 26.44411                       | 26.76446                       | 25.41377                  | 25.46451                  | 25.73635                  | 2.801957276                               | -1.049188614                            | Higher in PyMT Control | P52927;Q6NSP9    | P52927;Q6NSP9           |
| 26.75175                       | 26.69975                       | 26.86231                       | 25.91798                  | 25.64031                  | 25.66492                  | 3.285971292                               | -1.030198415                            | Higher in PyMT Control | P84104;A2A4X6    | P84104                  |
| 26.48769                       | 26.54185                       | 26.42822                       | 25.02327                  | 25.59833                  | 25.77455                  | 1.949885526                               | -1.020542781                            | Higher in PyMT Control | Q8BK67;A2AWQ2    | Q8BK67                  |
| 25.76951                       | 25.83123                       | 25.27498                       | NaN                       | 24.59833                  | 24.61526                  | 1.683166267                               | -1.018443743                            | Higher in PyMT Control | S4R1E5;F7A8H6;O7 | S4R1E5;F7A8H6;O7        |
| 26.27853                       | 26.32732                       | 25.85519                       | 25.37119                  | 24.74407                  | 25.30313                  | 1.89120811                                | -1.014217377                            | Higher in PyMT Control | P48759           | P48759                  |
| 26.86231                       | 27.13124                       | 27.01903                       | 25.52553                  | 26.23535                  | 26.21327                  | 1.831752117                               | -1.013811111                            | Higher in PyMT Control | G5E866;Q9N8B9    | G5E866;Q9N8B9           |
| 26.68311                       | 28.509                         | 28.63893                       | 27.43936                  | 27.60637                  | 26.64581                  | 3.366810543                               | -1.013167699                            | Higher in PyMT Control | G3X8T3;P16675;A2 | G3X8T3;P16675;A2        |
| 26.76446                       | 26.78955                       | 26.78955                       | 25.75685                  | 25.81909                  | 25.76192                  | 5.885579943                               | -1.001897176                            | Higher in PyMT Control | H7BX95;Q6PDM2;E  | H7BX95;Q6PDM2;E         |
| 25.34773                       | 25.1488                        | 25.43936                       | 23.75939                  | 24.391                    | 24.78457                  | 1.491026756                               | -1.000313441                            | Higher in PyMT Control | Q9CR60           | Q9CR60                  |
| 24.32889                       | 24.44335                       | 24.1795                        | 22.95837                  | 23.33756                  | 23.37562                  | 2.278765773                               | -0.999883652                            | Higher in PyMT Control | P09470;F6QCP8    | P09470;F6QCP8           |
| 25.79452                       | 25.41054                       | 25.49228                       | 24.47383                  | 24.35783                  | 24.8811                   | 2.140762638                               | -0.994857788                            | Higher in PyMT Control | Q9EPL2           | Q9EPL2                  |
| 24.7073                        | 27.78332                       | 27.7077                        | 26.55069                  | 26.78955                  | 26.73892                  | 2.840319073                               | -0.98188591                             | Higher in PyMT Control | Q9WVJ3           | Q9WVJ3                  |
| 25.34773                       | 24.7024                        | 25.10149                       | 24.12534                  | 23.99335                  | 24.10149                  | 2.149845451                               | -0.977148692                            | Higher in PyMT Control | P51859;E0CXAO;E0 | P51859;E0CXAO;E0        |
| 24.47383                       | 24.85757                       | 23.91342                       | 23.44253                  | 23.46762                  | 23.45513                  | 1.603909661                               | -0.959845861                            | Higher in PyMT Control | Q8VH51;F7AA45;E9 | Q8VH51;F7AA45;E9        |
| 24.89966                       | 25.26428                       | 24.90885                       | 23.94949                  | 24.28912                  | 24.04427                  | 2.390515364                               | -0.929968516                            | Higher in PyMT Control | Q9JKN1           | Q9JKN1                  |
| 27.46295                       | 27.45513                       | 27.22619                       | 26.16997                  | 26.47692                  | 26.71293                  | 2.213858652                               | -0.928148905                            | Higher in PyMT Control | Q8BT50;Q61656;S4 | Q8BT50;Q61656;S4        |
| 27.67976                       | 27.90885                       | 27.30661                       | 26.95394                  | 26.82639                  | 26.35448                  | 1.656743096                               | -0.920140584                            | Higher in PyMT Control | Q9Z2R8           | Q9Z2R8                  |
| 27.11148                       | 26.83846                       | 26.87408                       | 26.038                    | 25.97378                  | 26.1035                   | 3.191375042                               | -0.902915319                            | Higher in PyMT Control | Q92040;A0A1D5RL  | Q92040                  |
| 26.69975                       | 26.58978                       | 26.39428                       | 25.69975                  | 25.67573                  | 25.60399                  | 3.182697942                               | -0.901444117                            | Higher in PyMT Control | Q9D018           | Q9D018                  |
| 27.53148                       | 27.21697                       | 27.34942                       | 26.38607                  | 26.61807                  | 26.41054                  | 2.800909651                               | -0.894396464                            | Higher in PyMT Control | P10922           | P10922                  |
| 26.5285                        | 25.8                           |                                |                           |                           |                           |                                           |                                         |                        |                  |                         |

|          |          |          |          |          |            |             |              |                        |                   |                   |
|----------|----------|----------|----------|----------|------------|-------------|--------------|------------------------|-------------------|-------------------|
| 26.72598 | 26.68646 | 26.78955 | 25.90426 | 26.06085 | 25.87173   | 3.559707271 | -0.788380941 | Higher in PyMT Control | P12265;Q99KJ6;D3P | P12265            |
| 27.07112 | 27.08132 | 27.12139 | 26.28736 | 26.21141 | 26.4186    | 3.638838067 | -0.78548495  | Higher in PyMT Control | O88207            | O88207            |
| 26.9428  | 26.61807 | 26.71293 | 26.0041  | 25.99981 | 25.92931   | 2.846598869 | -0.78019015  | Higher in PyMT Control | Q60668;F6ZV59;G5  | Q60668;F6ZV59;G5  |
| 27.63201 | 27.37451 | 27.63201 | 26.71293 | 26.80193 | 26.80193   | 2.982837689 | -0.773910522 | Higher in PyMT Control | AOA1B0GR11;Q930   | AOA1B0GR11;Q930   |
| 25.2571  | 25.391   | 25.46451 | 24.71293 | 24.76951 | 24.31008   | 2.103904792 | -0.773362478 | Higher in PyMT Control | P62317            | P62317            |
| 24.42342 | 24.49228 | 23.83846 | 23.57542 | 23.51653 | 23.36453   | 3.167174647 | -0.76589933  | Higher in PyMT Control | Q9DAU1            | Q9DAU1            |
| 25.89273 | 25.7543  | 25.92252 | 25.08537 | 25.06085 | 25.1488    | 3.701766927 | -0.758174896 | Higher in PyMT Control | Q3UKN6;P81117     | Q3UKN6;P81117     |
| 25.7939  | 25.06497 | 25.34773 | 24.34435 | 24.15653 | 24.417     | 1.80072737  | -0.751402537 | Higher in PyMT Control | D3YTS4;Q9JH53     | D3YTS4;Q9JH53     |
| 27.28912 | 27.16997 | 26.80193 | 26.60399 | 26.27498 | 26.16806   | 1.700545466 | -0.737998327 | Higher in PyMT Control | Q8VDWQ;D6RHT5     | Q8VDWQ;D6RHT5     |
| 28.64581 | 29.08132 | 28.76129 | 28.16997 | 28.00838 | 28.09648   | 2.224993882 | -0.737862905 | Higher in PyMT Control | E9Q668;O08665;O8  | E9Q668;O08665;O8  |
| 23.29614 | 23.32389 | 23.24916 | 22.88017 | 22.29894 | 22.48247   | 1.882713928 | -0.735870997 | Higher in PyMT Control | Q9P52             | Q9P52             |
| 27.63201 | 27.63201 | 27.3662  | 26.75175 | 26.95394 | 26.72598   | 2.518243546 | -0.732848485 | Higher in PyMT Control | Q8C2Q7;O35737     | Q8C2Q7;O35737     |
| 27.01903 | 26.85043 | 26.68646 | 26.12731 | 26.12928 | 26.12928   | 2.787097169 | -0.727299372 | Higher in PyMT Control | Q80XR6;Q20BDO;Q   | Q80XR6;Q20BDO;Q   |
| 25.34773 | 25.78706 | 25.62923 | 25.04843 | 25.02327 | 24.51051   | 1.542734798 | -0.727272034 | Higher in PyMT Control | Q9Z1G3            | Q9Z1G3            |
| 23.87643 | 24.01903 | 23.99335 | 22.96895 | 23.54038 | 23.21401   | 1.868807281 | -0.721822104 | Higher in PyMT Control | Q62011;A8Y5F6     | Q62011;A8Y5F6     |
| 26.77706 | 26.63201 | 27.06085 | 26.08335 | 26.20769 | 26.01903   | 2.195875059 | -0.719949722 | Higher in PyMT Control | P70699;F6R5R5;AZ  | P70699            |
| 25.69445 | 25.78207 | 25.70504 | 24.72858 | 25.11347 | 25.18707   | 2.111447122 | -0.71747907  | Higher in PyMT Control | Q9DCW2;D3Z7J3     | Q9DCW2;D3Z7J3     |
| 27.34096 | 27.44727 | 27.39917 | 26.61807 | 26.73892 | 26.69975   | 3.950437934 | -0.71021843  | Higher in PyMT Control | Q64191;B7ZNK6     | Q64191;B7ZNK6     |
| 27.58978 | 27.85043 | 27.62506 | 26.83846 | 27.10149 | 26.99766   | 2.498845013 | -0.709218979 | Higher in PyMT Control | Q7TPV4            | Q7TPV4            |
| 27.11148 | 27.391   | 27.11148 | 26.39591 | 26.58978 | 26.52402   | 2.520162198 | -0.701412837 | Higher in PyMT Control | A2AMH5;A2AMH3;    | A2AMH5;A2AMH3;    |
| 25.33756 | 25.19084 | 24.93157 | 24.16423 | 24.51653 | 24.68646   | 1.639346273 | -0.697584788 | Higher in PyMT Control | G3UXT7;Q8CF09;P   | G3UXT7;Q8CF09;P   |
| 24.91342 | 24.37119 | 24.46762 | 23.79947 | 23.21401 | 23.72858   | 1.541524083 | -0.696994781 | Higher in PyMT Control | J3QNS1;J3QPT3;B0  | J3QNS1;J3QPT3;B0  |
| 24.66492 | 24.58118 | 24.5285  | 24.03591 | 23.83846 | 23.81909   | 3.014919457 | -0.693717321 | Higher in PyMT Control | Q9DCC5;P23198;D3  | Q9DCC5;P23198;D3  |
| 26.82639 | 26.86231 | 26.9428  | 26.28912 | 26.17188 | 26.09346   | 3.319163431 | -0.692343394 | Higher in PyMT Control | Q9D0F3            | Q9D0F3            |
| 29.7162  | 29.95394 | 29.89446 | 29.1795  | 29.14346 | 29.16758   | 3.177244391 | -0.691355387 | Higher in PyMT Control | Q9200             | Q9200             |
| 25.61526 | 25.62923 | 25.27142 | 24.94056 | 24.64306 | 24.86703   | 2.022658439 | -0.688421885 | Higher in PyMT Control | P62305;E9Q4F4;E9  | P62305;E9Q4F4;E9  |
| 28.95394 | 29.15557 | 28.81726 | 28.31095 | 28.21697 | 28.35363   | 2.518591384 | -0.681739807 | Higher in PyMT Control | Q9Z2X1;J3Q8M0;J3  | Q9Z2X1;J3Q8M0;J3  |
| 29.62854 | 29.4512  | 29.57903 | 28.80809 | 28.88867 | 28.92025   | 3.393930467 | -0.680585861 | Higher in PyMT Control | O5NCU4;AOA115S    | O5NCU4;AOA115S    |
| 26.33245 | 26.38278 | 26.38607 | 25.81421 | 25.85757 | 25.391     | 1.977320465 | -0.679506938 | Higher in PyMT Control | Q99M71;AOA1Y7V    | Q99M71            |
| 29.67472 | 29.66119 | 29.67472 | 28.98685 | 29.01903 | 29.01903   | 5.849189112 | -0.678087234 | Higher in PyMT Control | Q61398;D3YUE2;A   | Q61398;D3YUE2;A   |
| 26.12139 | 26.07521 | 25.87408 | 25.12534 | 25.24264 | 25.68913   | 1.632921071 | -0.671194077 | Higher in PyMT Control | P32067;A2AR07;D6  | P32067;A2AR07     |
| 29.77706 | 29.65096 | 29.6764  | 28.98414 | 28.93157 | 29.1795    | 2.859233792 | -0.669739405 | Higher in PyMT Control | P48678;D3YU7F     | P48678            |
| 29.96774 | 29.94    | 30.00838 | 29.24672 | 29.32603 | 29.34038   | 4.314409394 | -0.666765849 | Higher in PyMT Control | P18242;F8W1R1;F6  | P18242;F8W1R1;F6  |
| 24.9838  | 24.55801 | 24.50446 | 23.68646 | 23.89504 | 24.00196   | 2.652305045 | -0.659130732 | Higher in PyMT Control | Q9QY77            | Q9QY77            |
| 27.98685 | 27.92025 | 28.0296  | 27.1795  | 27.42342 | 27.35783   | 2.935609042 | -0.658650716 | Higher in PyMT Control | P47879;H3BLB7;H3  | P47879;H3BLB7;H3  |
| 30.90455 | 31.00169 | 30.83092 | 30.28692 | 30.26472 | 30.21928   | 3.599666221 | -0.655412674 | Higher in PyMT Control | J3QNY1;B2RXM2;A2  | J3QNY1;B2RXM2;A2  |
| 28.38629 | 28.21234 | 28.31527 | 27.67976 | 27.66628 | 27.61105   | 3.543648571 | -0.65247345  | Higher in PyMT Control | O88325            | O88325            |
| 24.59263 | 24.54038 | 24.93157 | 24.17188 | 24.11744 | 23.82881   | 1.790809888 | -0.648817698 | Higher in PyMT Control | Q80UM7            | Q80UM7            |
| 27.84446 | 27.89157 | 28.15074 | 27.41538 | 27.46295 | 27.07112   | 1.843093644 | -0.645771027 | Higher in PyMT Control | P29416            | P29416            |
| 24.41054 | 24.8811  | 24.46762 | 23.72858 | 23.99335 | 24.10949   | 1.584311897 | -0.642616908 | Higher in PyMT Control | P83887;Q8VCK3     | P83887;Q8VCK3     |
| 30.4334  | 30.36202 | 30.41337 | 29.87644 | 29.82639 | 29.68479   | 3.758283834 | -0.637062073 | Higher in PyMT Control | P24369            | P24369            |
| 28.42342 | 28.49762 | 28.45905 | 27.75175 | 27.87408 | 27.87994   | 3.733981094 | -0.624774933 | Higher in PyMT Control | Q640N1;AOA0R4I0   | Q640N1            |
| 29.06599 | 28.92025 | 29.19835 | 28.33671 | 28.51653 | 28.45905   | 2.535411152 | -0.624105453 | Higher in PyMT Control | Q61937;Q9DAY9;Q   | Q61937;Q9DAY9;Q   |
| 27.97049 | 28.14589 | 28.3662  | 27.46295 | 27.53148 | 27.63893   | 2.099421718 | -0.616404851 | Higher in PyMT Control | P23780;AOA115S1   | P23780            |
| 26.89735 | 26.52103 | 26.46139 | 25.98685 | 26.14492 | 25.90426   | 1.79230616  | -0.614582062 | Higher in PyMT Control | Q921M3            | Q921M3            |
| 28.63547 | 28.56456 | 28.57903 | 28.09648 | 27.96499 | 27.87994   | 3.110055414 | -0.612552643 | Higher in PyMT Control | AOA087WPL5;E9Q    | AOA087WPL5;E9Q    |
| 27.08132 | 27.00838 | 27.15074 | 26.56384 | 26.49686 | 26.34604   | 2.878204765 | -0.611232758 | Higher in PyMT Control | G5E924;Q8R081;G   | G5E924;Q8R081;G   |
| 25.1946  | 25.14492 | 24.94056 | 24.40406 | 24.73376 | 24.31008   | 1.816583985 | -0.610726674 | Higher in PyMT Control | AOA0R4I138;P504   | AOA0R4I138;P504   |
| 22.56384 | 22.69073 | 22.45056 | 21.94235 | 22.20658 | 21.74714   | 1.78713016  | -0.601184209 | Higher in PyMT Control | Q9D771            | Q9D771            |
| 28.39917 | 28.35363 | 28.45513 | 27.84446 | 27.76446 | 27.80809   | 4.047011259 | -0.596978505 | Higher in PyMT Control | Q8BF84;AOA1W2P8   | Q8BF84            |
| 33.7751  | 33.79459 | 33.78488 | 33.1916  | 33.15436 | 33.21784   | 5.190204464 | -0.596921285 | Higher in PyMT Control | Q101853           | Q101853           |
| 26.92025 | 27.18896 | 26.82639 | 26.55655 | 26.29439 | 1.89118564 | 1.89118564  | -0.596756617 | Higher in PyMT Control | G3AXA21;EOC222;D3 | G3AXA21;EOC222;D3 |
| 24.91342 | 25.32732 | 24.87643 | 24.33074 | 24.52253 | 24.51653   | 1.679220449 | -0.582454681 | Higher in PyMT Control | Q8BL66            | Q8BL66            |
| 27.83244 | 27.89735 | 27.86821 | 27.15074 | 27.23535 | 27.47846   | 2.351061334 | -0.577814738 | Higher in PyMT Control | Q921F2;AOA087WR   | Q921F2;AOA087WR   |
| 26.52552 | 26.71293 | 26.81421 | 26.04218 | 26.02327 | 26.26964   | 2.107796077 | -0.572524389 | Higher in PyMT Control | Q8VEH3;F6QK2      | Q8VEH3;F6QK2      |
| 25.85281 | 26.07521 | 26.1035  | 25.42662 | 25.48922 | 25.4008    | 2.622899227 | -0.571622213 | Higher in PyMT Control | P27048;P61363;AO  | P27048;P61363;AO  |
| 24.42982 | 24.02749 | 24.24345 | 23.57542 | 23.66492 | 23.72858   | 1.995993999 | -0.570910772 | Higher in PyMT Control | Q60972            | Q60972            |
| 26.81421 | 26.92025 | 26.53297 | 26.04427 | 26.20583 | 26.31872   | 1.804817821 | -0.566203435 | Higher in PyMT Control | Q9DB73;G3UZG6;G   | Q9DB73;G3UZG6;G   |
| 25.37119 | 25.41377 | 25.58692 | 25.05258 | 24.77455 | 24.84805   | 2.223582957 | -0.565568288 | Higher in PyMT Control | P24638;B7ZCF4;B7  | P24638            |
| 25.9428  | 25.74663 | 26.05051 | 25.42982 | 25.317   | 25.30313   | 2.349682029 | -0.563330968 | Higher in PyMT Control | Q78XF5            | Q78XF5            |
| 26.78955 | 26.65949 | 26.54628 | 26.16615 | 26.2021  | 25.94503   | 2.201293182 | -0.560680389 | Higher in PyMT Control | E9Q153;Q01405     | E9Q153;Q01405     |
| 28.53519 | 28.46295 | 28.4746  | 27.85043 | 28.06085 | 27.88577   | 2.902433797 | -0.55856514  | Higher in PyMT Control | Q9D1D4;AOA1Y7V    | Q9D1D4;AOA1Y7V    |
| 27.39917 | 27.34942 | 27.42342 | 26.81421 | 26.85043 | 26.85043   | 4.611408735 | -0.552314123 | Higher in PyMT Control | P17439;AOA0G2JD   | P17439;AOA0G2JD   |
| 26.90885 | 27.12139 | 26.97596 | 26.45199 | 26.4567  | 26.47537   | 2.991126054 | -0.540714264 | Higher in PyMT Control | P62320;AOA1W2P7   | P62320;AOA1W2P7   |
| 27.4073  | 27.54628 | 27.15074 | 26.75175 | 26.86231 | 26.87408   | 1.934680559 | -0.538727442 | Higher in PyMT Control | Q9CQ22;AOA0A6YX   | Q9CQ22            |
| 26.20583 | 26.21327 | 26.15267 | 25.45513 | 25.72598 | 25.78706   | 2.171407418 | -0.534531275 | Higher in PyMT Control | O35215;G3UZN1;G   | O35215;G3UZN1;G   |
| 25.86231 | 25.89504 | 25.81421 | 25.37451 | 25.48616 | 25.12928   | 2.08898416  | -0.527204514 | Higher in PyMT Control | E9PUX0;Q8OW17;F6  | E9PUX0;Q8OW17;F6  |
| 29.28692 | 29.16279 | 29.21002 | 28.49762 | 28.77077 | 28.81115   | 2.131921851 | -0.526727041 | Higher in PyMT Control | E9QN70;P02469     | E9QN70;P02469     |
| 29.58978 | 29.708   | 29.6372  | 29.11892 | 29.13614 | 29.12139   | 3.932400706 | -0.519510269 | Higher in PyMT Control | P61979;B2M1R6;A6  | P61979;B2M1R6;A6  |
| 24.8811  | 24.87173 | 25.06624 | 24.33756 | 24.48616 | 24.38443   | 2.955431925 | -0.516978582 | Higher in PyMT Control | E9QAN4;G3UW47;G   | E9QAN4;G3UW47;G   |
| 26.04635 | 26.0041  | 26.06907 | 25.39754 | 25.4008  | 25.77957   | 1.795133644 | -0.513872147 | Higher in PyMT Control | Q9CXE7;E9PXY3;D3  | Q9CXE7;E9PXY3;D3  |
| 28.20303 | 28.1795  | 28.12633 | 27.71293 | 27.73247 | 27.55362   | 2.928729717 | -0.503278732 | Higher in PyMT Control | P54116            | P54116            |
| 27.13124 | 26.99766 | 27.34942 | 26.60399 | 26.61807 | 26.75175   | 1.947440606 | -0.501502991 | Higher in PyMT Control | Q3TCN2            | Q3TCN2            |
| 29.34308 | 29.21002 | 29.391   | 28.71293 | 28.81726 | 28.91171   | 2.500476726 | -0.500731786 | Higher in PyMT Control | P37889            | P37889            |
| 27.2803  | 27.07112 | 27.00838 | 26.56238 | 26.77706 | 26.55215   | 1.946622027 | -0.489401499 | Higher in PyMT Control | Q99K11;AOA286YD   | Q99K11;AOA286YD   |
| 28.20303 | 28.01372 | 28.37036 | 27.73892 | 27.69975 | 27.71293   | 2.00391063  | -0.478501638 | Higher in PyMT Control | P12023            | P12023            |
| 28.78019 | 28.91741 | 28.74535 | 28.391   | 28.3452  | 28.28472   | 2.833605662 | -0.474013011 | Higher in PyMT Control | Q60963;E9Q330;E9  | Q60963;E9Q330;E9  |
| 28.95535 | 29.01109 | 29.06477 | 28.50468 | 28.59432 | 28.51206   | 3.442183516 | -0.473379771 | Higher in PyMT Control | AOA087WR50;Q3U    | AOA087WR50;Q3U    |
| 26.09144 | 26.11744 | 26.06907 | 25.76446 | 25.67034 | 25.43619   | 2.049392163 | -0.468988419 | Higher in PyMT Control | AOA0R4I123;Q9CR   | AOA0R4I123;Q9CR   |
| 26.61807 | 26.65949 | 26.56384 | 26.09144 | 26.07928 | 26.26428   | 2.686674225 | -0.468798319 | Higher in PyMT Control | Q61235;B7ZNU9     | Q61235;B7ZNU9     |
| 27.56819 | 27.56092 |          |          |          |            |             |              |                        |                   |                   |

|          |          |          |          |          |          |              |             |                   |                   |                  |
|----------|----------|----------|----------|----------|----------|--------------|-------------|-------------------|-------------------|------------------|
| 28.44727 | 28.41538 | 28.43964 | 28.72598 | 28.70306 | 28.76446 | 3.895835385  | 0.297161738 | Higher in PyMT RT | A0A0R4I2W8;O884   | A0A0R4I2W8;O884  |
| 32.89374 | 32.91171 | 32.83281 | 33.13614 | 33.18719 | 33.21928 | 3.048744402  | 0.30144755  | Higher in PyMT RT | Q9JHU4;F6ZX84     | Q9JHU4           |
| 30.74535 | 30.71293 | 30.72923 | 30.96774 | 31.08639 | 31.04791 | 2.96406423   | 0.304843903 | Higher in PyMT RT | P62754            | P62754           |
| 28.77706 | 28.78019 | 28.82335 | 29.07877 | 29.09396 | 29.12386 | 3.972297781  | 0.305330276 | Higher in PyMT RT | P34022;H7BX22     | P34022;H7BX22    |
| 29.92592 | 29.86673 | 29.91171 | 30.23078 | 30.23078 | 30.17236 | 3.520237613  | 0.309848785 | Higher in PyMT RT | Q99K85;Q3U6K9;E9  | Q99K85;Q3U6K9    |
| 30.62854 | 30.57542 | 30.57542 | 30.83846 | 30.94    | 30.95394 | 2.648601529  | 0.317668915 | Higher in PyMT RT | Q8CGC7;A0A0A6YV   | Q8CGC7           |
| 31.50616 | 31.5389  | 31.4919  | 31.87921 | 31.81955 | 31.79266 | 3.399870808  | 0.318150202 | Higher in PyMT RT | P40124;B1ARS0     | P40124           |
| 27.90885 | 27.93157 | 27.86231 | 28.14589 | 28.27142 | 28.24898 | 2.738859445  | 0.321188609 | Higher in PyMT RT | P00493            | P00493           |
| 34.03485 | 34.00169 | 34.02663 | 34.38921 | 34.33031 | 34.31013 | 3.630534177  | 0.322157542 | Higher in PyMT RT | P10126;D3Y268;D3  | P10126;D3Y268;D3 |
| 31.08005 | 31.02828 | 31.0927  | 31.31959 | 31.44825 | 31.41337 | 2.786517114  | 0.326725642 | Higher in PyMT RT | Q61753;F6Z587     | Q61753           |
| 29.69644 | 29.67303 | 29.79885 | 30.03486 | 30.09899 | 30.02168 | 2.715396135  | 0.329067866 | Higher in PyMT RT | O70503            | O70503           |
| 28.69644 | 28.64238 | 28.76129 | 29.04009 | 29.0531  | 29.0296  | 3.204035092  | 0.340895971 | Higher in PyMT RT | Q99M1N1;Q8R2P8    | Q99M1N1;Q8R2P8   |
| 27.52402 | 27.51653 | 27.45513 | 27.85638 | 27.85043 | 27.81421 | 3.747058473  | 0.341779073 | Higher in PyMT RT | Q9C230;B1AYJ9     | Q9C230           |
| 32.69851 | 32.74735 | 32.71088 | 33.14224 | 33.02003 | 33.02828 | 2.917179632  | 0.344601949 | Higher in PyMT RT | P18760;F8WGL3     | P18760;F8WGL3    |
| 29.98142 | 30.00838 | 29.91171 | 30.31959 | 30.27586 | 30.34096 | 3.245630401  | 0.344966253 | Higher in PyMT RT | Q99I24;P36536;A0A | Q99I24;P36536    |
| 30.36202 | 30.26472 | 30.33031 | 30.67976 | 30.67976 | 30.64581 | 3.463093462  | 0.349426905 | Higher in PyMT RT | Q9CZD3            | Q9CZD3           |
| 28.64238 | 28.66289 | 28.63201 | 29.05051 | 28.96499 | 28.97869 | 3.637258563  | 0.352308273 | Higher in PyMT RT | Q62426            | Q62426           |
| 32.0414  | 32.11148 | 32.2106  | 32.48712 | 32.42842 | 32.52262 | 2.506351304  | 0.358229319 | Higher in PyMT RT | P17751;H7BXC3     | P17751;H7BXC3    |
| 30.4334  | 30.41337 | 30.55728 | 30.87555 | 30.80809 | 30.81574 | 2.734607933  | 0.365107854 | Higher in PyMT RT | E905G3;A0A115R9   | E905G3;A0A115R9  |
| 28.90885 | 28.85011 | 28.87994 | 29.26919 | 29.18187 | 29.24898 | 3.08619317   | 0.368747711 | Higher in PyMT RT | P67984            | P67984           |
| 31.26472 | 31.20769 | 31.12386 | 31.5527  | 31.55728 | 31.59335 | 2.999124015  | 0.369016647 | Higher in PyMT RT | P68040            | P68040           |
| 27.86821 | 28.02433 | 27.90311 | 28.30226 | 28.26696 | 28.25783 | 2.649380856  | 0.377134323 | Higher in PyMT RT | P63168;Q80Z57     | P63168           |
| 29.69478 | 29.71457 | 29.76604 | 30.12386 | 30.13614 | 30.07368 | 3.760834301  | 0.386096319 | Higher in PyMT RT | Q3TGU7;P50580     | Q3TGU7;P50580    |
| 32.31149 | 32.44825 | 32.36984 | 32.85155 | 32.69851 | 32.73933 | 2.510997374  | 0.386601766 | Higher in PyMT RT | P14069            | P14069           |
| 27.79576 | 27.77957 | 27.90885 | 28.21234 | 28.20303 | 28.18896 | 3.860222805  | 0.386933645 | Higher in PyMT RT | P83882;A0A0A6YV   | P83882;A0A0A6YV  |
| 29.46684 | 29.48808 | 29.34731 | 29.82031 | 29.81268 | 29.84296 | 3.025525403  | 0.391241709 | Higher in PyMT RT | Q00612;A3K636;G3  | Q00612;A3K636    |
| 29.66966 | 29.57001 | 29.61456 | 29.94    | 29.98142 | 30.11148 | 3.2573879266 | 0.392887115 | Higher in PyMT RT | Q61768;E9QAK5;P3  | Q61768;E9QAK5    |
| 29.30878 | 29.19131 | 29.20536 | 29.58978 | 29.64238 | 29.66966 | 3.091847426  | 0.398787816 | Higher in PyMT RT | Q920N1;A2AAW9;Q9  | Q920N1;A2AAW9    |
| 28.75494 | 28.77392 | 28.78332 | 29.0531  | 29.20303 | 29.26249 | 2.513705316  | 0.4021492   | Higher in PyMT RT | P70698            | P70698           |
| 28.01903 | 28.06599 | 27.97596 | 28.4073  | 28.45905 | 28.41135 | 3.713481075  | 0.405569077 | Higher in PyMT RT | Q99KJ8            | Q99KJ8           |
| 29.30226 | 29.15074 | 29.33245 | 29.70306 | 29.66628 | 29.64065 | 2.638323036  | 0.40818278  | Higher in PyMT RT | P06867            | P06867           |
| 31.88649 | 31.75332 | 31.84595 | 32.25912 | 32.2535  | 32.20478 | 3.212125635  | 0.409210841 | Higher in PyMT RT | P35700;B1AXW5;B3  | P35700;B1AXW5    |
| 28.20769 | 28.24445 | 28.20303 | 28.61807 | 28.61105 | 28.70306 | 3.715640354  | 0.425666173 | Higher in PyMT RT | E905G6;E9Q3M3;O9  | E905G6;E9Q3M3    |
| 29.62157 | 29.52776 | 29.509   | 29.94    | 30.04791 | 30.09394 | 3.037279767  | 0.427841187 | Higher in PyMT RT | Q9R0P5            | Q9R0P5           |
| 30.14831 | 30.08639 | 30.14831 | 30.42342 | 30.65438 | 30.59335 | 2.398665921  | 0.429377874 | Higher in PyMT RT | P63325;Q3UW83     | P63325;Q3UW83    |
| 30.4919  | 30.39305 | 30.50142 | 30.87555 | 30.91883 | 30.88285 | 3.498747311  | 0.430287043 | Higher in PyMT RT | P35279            | P35279           |
| 29.99496 | 29.95394 | 29.84595 | 30.35153 | 30.33031 | 30.41337 | 2.980117498  | 0.43345197  | Higher in PyMT RT | Q8C483;P26638;A2  | Q8C483;P26638    |
| 29.37036 | 29.32174 | 29.27808 | 29.7162  | 29.7162  | 29.85935 | 2.890570138  | 0.440524419 | Higher in PyMT RT | Q61171;D3Z444     | Q61171;D3Z444    |
| 28.74855 | 28.66289 | 28.76446 | 29.1712  | 29.14346 | 29.1866  | 3.693282572  | 0.443759918 | Higher in PyMT RT | P61514;A0A1D5R1R  | P61514;A0A1D5R1R |
| 28.23535 | 28.07623 | 27.97049 | 28.60399 | 28.62157 | 28.41135 | 1.937507981  | 0.451615016 | Higher in PyMT RT | Q9J18             | Q9J18            |
| 28.43539 | 28.41941 | 28.4746  | 28.77706 | 28.97049 | 28.94559 | 2.71048939   | 0.454577764 | Higher in PyMT RT | P62900;A0A0A6YX2  | P62900;A0A0A6YX2 |
| 25.1488  | 25.317   | 25.23169 | 25.73892 | 25.81421 | 25.51653 | 1.964795016  | 0.457391739 | Higher in PyMT RT | Q9ER41;F6VK94;D6  | Q9ER41;F6VK94    |
| 31.41337 | 31.32496 | 31.30334 | 31.79653 | 31.88649 | 31.73731 | 2.953273454  | 0.459553401 | Higher in PyMT RT | Q62465            | Q62465           |
| 30.67135 | 30.55728 | 30.61105 | 31.04791 | 31.08639 | 31.08639 | 3.097221709  | 0.460336685 | Higher in PyMT RT | P35441;E9PWF0;Q9  | P35441           |
| 27.92592 | 27.85043 | 28.09144 | 28.41538 | 28.35363 | 28.48616 | 2.335760507  | 0.462460836 | Higher in PyMT RT | P21550;Q5SX59;J3  | P21550           |
| 27.5969  | 27.42342 | 27.42342 | 27.86231 | 27.8577  | 28.09648 | 2.110977253  | 0.466932933 | Higher in PyMT RT | E99YH2;Q91V12     | E99YH2;Q91V12    |
| 28.42342 | 28.4073  | 28.35783 | 28.6764  | 28.88577 | 29.0531  | 1.896144484  | 0.475570679 | Higher in PyMT RT | Q8C522;A0A115S8   | Q8C522           |
| 28.85757 | 28.70767 | 28.75939 | 28.26785 | 28.34435 | 28.41488 | 2.571812096  | 0.478791555 | Higher in PyMT RT | H7BWZ1;D3YV97;H7  | H7BWZ1;D3YV97    |
| 27.95947 | 27.91947 | 27.91456 | 28.29789 | 28.26696 | 28.48616 | 2.072516795  | 0.485833486 | Higher in PyMT RT | Q5UE59;E9Q7C9;Q   | Q5UE59;E9Q7C9    |
| 33.72517 | 33.74535 | 33.80424 | 34.25491 | 34.26192 | 34.22647 | 1.932851927  | 0.489513397 | Higher in PyMT RT | P58252            | P58252           |
| 27.94574 | 24.58031 | 24.80931 | 25.07316 | 25.24627 | 25.23732 | 4.956585975  | 0.494969686 | Higher in PyMT RT | Q61655;Q8R3C7;Q8  | Q61655;Q8R3C7    |
| 29.96774 | 30.02168 | 29.95394 | 30.52962 | 30.45317 | 30.45317 | 3.95749681   | 0.497533162 | Higher in PyMT RT | Q6ZW26;F7AEH4;A6  | Q6ZW26;F7AEH4    |
| 25.06970 | 25.27498 | 25.12139 | 25.67842 | 25.68646 | 25.60116 | 2.751993248  | 0.500198364 | Higher in PyMT RT | Q91ZR1;P56371     | Q91ZR1           |
| 29.55179 | 29.44332 | 29.52589 | 30.02168 | 29.98142 | 30.02168 | 3.842693563  | 0.50125885  | Higher in PyMT RT | P61164            | P61164           |
| 28.52028 | 28.41538 | 28.53519 | 28.99226 | 28.99496 | 28.99766 | 3.743153475  | 0.504674911 | Higher in PyMT RT | Q9ER72;A0A140L1B  | Q9ER72           |
| 24.64856 | 24.77453 | 24.79452 | 25.15267 | 25.43619 | 25.14492 | 2.05053259   | 0.505385081 | Higher in PyMT RT | P70202            | P70202           |
| 28.34096 | 28.15557 | 28.07112 | 28.63547 | 28.67303 | 28.79576 | 2.1271588675 | 0.512203852 | Higher in PyMT RT | Q90D819           | Q90D819          |
| 27.38278 | 27.47073 | 27.65267 | 27.87994 | 28.05569 | 28.12633 | 2.062513737  | 0.518592199 | Higher in PyMT RT | P28474;A0A0G2G3   | P28474           |
| 23.64306 | 23.68646 | 23.66492 | 24.20955 | 24.20955 | 24.15653 | 4.771368553  | 0.527065913 | Higher in PyMT RT | Q8BY18            | Q8BY18           |
| 21.6201  | NaN      | 21.44253 | 22.15808 | 22.01563 | 22.0258  | 1.979250947  | 0.529236158 | Higher in PyMT RT | Q8R317            | Q8R317           |
| 27.79576 | 27.81421 | 27.92592 | 28.43539 | 28.41538 | 28.27586 | 2.92104831   | 0.530251185 | Higher in PyMT RT | Q60817;P70670     | Q60817;P70670    |
| 24.16423 | 23.89504 | 24.12534 | 24.74919 | 24.53445 | 24.49838 | 2.010809178  | 0.53247261  | Higher in PyMT RT | A0A0N45W5D;Q9C    | A0A0N45W5D;Q9C   |
| 29.4174  | 29.17236 | 29.31095 | 29.87994 | 29.89735 | 29.73892 | 2.462740937  | 0.538502375 | Higher in PyMT RT | F70DB3;Q3URZ6     | F70DB3           |
| 24.42342 | 24.14102 | 24.42342 | 24.90426 | 25.00624 | 24.78457 | 2.124822427  | 0.569068909 | Higher in PyMT RT | P99025            | P99025           |
| 24.83846 | 24.81421 | 24.67573 | 25.54038 | 25.08942 | 25.42662 | 1.786588263  | 0.576007843 | Higher in PyMT RT | D32390;Q921C5;A0  | D32390;Q921C5    |
| 28.47846 | 28.21697 | 28.56092 | 28.88867 | 29.06856 | 29.05827 | 2.10369742   | 0.586381912 | Higher in PyMT RT | P63005;Q5SW16     | P63005           |
| 22.36185 | 22.49228 | NaN      | 23.07398 | 22.96543 | NaN      | 1.701431534  | 0.592638016 | Higher in PyMT RT | P07742            | P07742           |
| 27.98142 | 28.16039 | 27.81421 | 28.55362 | 28.54995 | 28.64238 | 2.333455408  | 0.596645355 | Higher in PyMT RT | G3UYV7;P62858     | G3UYV7;P62858    |
| 24.28207 | 24.239   | 24.33756 | 25.08132 | 24.66492 | 24.90426 | 2.068703106  | 0.597291946 | Higher in PyMT RT | P62878            | P62878           |
| 24.67034 | 24.80931 | 24.58692 | 25.23535 | 25.31354 | 25.31008 | 2.992618165  | 0.597468058 | Higher in PyMT RT | P55821            | P55821           |
| 24.50446 | 24.31008 | 24.42982 | 24.85757 | 24.97158 | 25.21697 | 1.244413004  | 0.600589116 | Higher in PyMT RT | Q9CZWS            | Q9CZWS           |
| 28.10149 | 28.19366 | 28.06599 | 28.65267 | 28.78332 | 28.77077 | 3.39715848   | 0.615202586 | Higher in PyMT RT | P15532;Q5NC80;Q5  | P15532;Q5NC80    |
| 29.65267 | 29.53148 | 29.73085 | 30.29789 | 30.18423 | 30.28692 | 3.081118912  | 0.618015925 | Higher in PyMT RT | D3YT09;P62843     | D3YT09;P62843    |
| 25.43301 | 25.15267 | 25.42662 | 26.01691 | 25.93607 | 25.92025 | 2.10765724   | 0.620309194 | Higher in PyMT RT | A0A087WQ52;Q9C    | A0A087WQ52;Q9C   |
| 27.28912 | 27.16997 | 27.00838 | 27.74535 | 27.75812 | 27.86239 | 2.725494293  | 0.620791753 | Higher in PyMT RT | Q6Z371;A0A0A6YX   | Q6Z371           |
| 26.96499 | 26.82639 | 26.93157 | 27.42342 | 27.56819 | 27.60399 | 3.077122953  | 0.624221166 | Higher in PyMT RT | P13230;Q3UZG4;A0  | P13230;Q3UZG4    |
| 26.34266 | 26.86231 | 26.01478 | 26.76446 | 26.68646 | 26.65949 | 1.912233715  | 0.630219777 | Higher in PyMT RT | E9Q137            | E9Q137           |
| 24.91798 | 25.1757  | 24.82396 | 25.44569 | 25.53148 | 25.85043 | 1.767696348  | 0.636655807 | Higher in PyMT RT | Q91WG4            | Q91WG4           |
| 28.15557 | 28.07623 | 28.18896 | 28.65699 | 28.82639 | 28.88867 | 2.988798456  | 0.651262919 | Higher in PyMT RT | Q9CY58;A0A0N4S5   | Q9CY58;A0A0N4S5  |
| 26.50597 | 25.99118 | 26.48001 | 26.99766 | 27.09144 | 26.88577 | 1.699293374  | 0.665899913 | Higher in PyMT RT | B1AT82;Q9DOM1;B1  | B1AT82;Q9DOM1    |
| 26.18139 | 25.98251 | 26.06497 | 27.05051 | 26.5285  | 26.69975 | 1.850709     |             |                   |                   |                  |

|          |          |          |          |          |          |             |             |                   |                 |                |
|----------|----------|----------|----------|----------|----------|-------------|-------------|-------------------|-----------------|----------------|
| 23.96719 | 24.10949 | 24.28207 | 25.46762 | 24.98468 | 25.94726 | 2.000751876 | 1.346939723 | Higher in PyMT RT | Q8CBY8          | Q8CBY8         |
| 23.87643 | 22.9566  | 24.72858 | 25.22803 | 25.64856 | 25.19084 | 1.321056069 | 1.501939774 | Higher in PyMT RT | Q00780          | Q00780         |
| 24.90885 | 23.0258  | 24.26069 | 25.83605 | 26.34435 | 26.35783 | 1.664205218 | 2.114297231 | Higher in PyMT RT | F2Z4A3;A0A087WR | F2Z4A3;A0A087W |

| Protein names                                  | Gene names | GOBP name                                                                    | GOMF name                                                                         | GOCC name                                                                                                 | KEGG name                                                                    |
|------------------------------------------------|------------|------------------------------------------------------------------------------|-----------------------------------------------------------------------------------|-----------------------------------------------------------------------------------------------------------|------------------------------------------------------------------------------|
| Biliverdin reductase A                         | Bilvra     | catabolic process;cellular catabolic process;cell                            | biliverdin reductase activity;binding;catalytic acti                              | cell part;cytoplasm;intracellular part                                                                    | Porphyrin and chlorophyll metabolism                                         |
| Pigment epithelium-factor                      | Serpinf1   | biological regulation;negative regulation of angiogenesis                    | endopeptidase inhibitor activity;endopeptidase                                    | cell part;cytoplasmic membrane-bounded vesicle                                                            |                                                                              |
| Complement factor H                            | Cfh        | activation of immune response;biological regulation                          | binding;carbohydrate binding;glycosaminoglycan                                    | extracellular region                                                                                      | Complement and coagulation cascades;Staphylococcus aureus                    |
| Aggrin                                         | Agrr       | biological regulation;cell surface receptor linkage                          | acetylcholine receptor regulator activity;binding                                 | basal lamina;cell junction;cell part;cell surface;extracellular matrix;extracellular region;intracellular | ECM-receptor interaction                                                     |
| Insulin-like growth factor 1                   | Igf1bp7    | anatomical structure development;biological process                          | binding;DNA binding;nucleic acid binding                                          | cell part;chromatin;chromosomal part;intracellular                                                        |                                                                              |
| Histone H1.1                                   | Hist1h1a   | cellular component assembly;cellular component                               | binding;DNA binding;nucleic acid binding                                          | cell part;chromatin;chromosomal part;intracellular                                                        |                                                                              |
| Lysosomal alpha-mannosidase                    | Man2b1     | alcohol metabolic process;behavior;carbohydrate                              | alpha-mannosidase activity;binding;carbohydrate                                   | cell part;cytoplasmic part;intracellular membrane                                                         | Lysosome;Other glycan degradation                                            |
| Serotransferrin                                | Tf         | actin cytoskeleton organization;actin filament                               | binding;cation binding;ferric iron binding;ion binding                            | cell part;coated pit;cytoplasmic membrane-bounded vesicle                                                 | Mineral absorption                                                           |
| Junction plakoglobin                           | Jup        | anatomical structure development;anatomical structure                        | binding;cadherin binding;cell adhesion molecule                                   | actin cytoskeleton;adherens junction;anchoring junction                                                   | Acute myeloid leukemia;Arrhythmogenic right ventricular dysplasia            |
| Mannose-1-phosphate 6-epimerase                | Gmpmpa     | analog biosynthetic process;alcohol metabolic process                        | binding;catalytic activity;GTP binding;guananyl transferase activity              | cell part;coated pit;cytoplasmic membrane-bounded vesicle                                                 | Protein export                                                               |
| Predicted gene 20425                           | Gm20425    | biological regulation;cation homeostasis;cation transport                    | binding;cation binding;enzyme inhibitor activity                                  | cell part;coated pit;cytoplasmic membrane-bounded vesicle                                                 | Axon guidance                                                                |
| Semaphorin-7A                                  | Sema7a     | biological regulation;cell surface receptor linkage                          | receptor activity                                                                 | anchored to membrane;cell part;external side                                                              |                                                                              |
| Cathepsin Z                                    | Ctsz       | anatomical structure morphogenesis;branching morphogenesis                   | catalytic activity;cysteine-type peptidase activity                               | cell part;cytoplasmic part;endoplasmic reticulum                                                          | Lysosome                                                                     |
| Putative RNA-binding protein 1                 | Luc712     | biological regulation;negative regulation of biological process              | binding;nucleic acid binding                                                      | cell part;intracellular membrane-bounded organelle                                                        |                                                                              |
| Protein CTLA-2-alpha-1                         | Ctla2a     | biological regulation;negative regulation of biological process              | cysteine-type endopeptidase inhibitor activity;binding                            | cell part;cell projection;dendrite;extracellular region                                                   |                                                                              |
| Cathepsin L1;Cathepsin L                       | Ctsl       | aging;anatomical structure development;autophagy                             | aminopeptidase activity;binding;catalytic activity                                | cell part;cell projection;cytoplasmic part;external side                                                  | Antigen processing and presentation;Lysosome                                 |
| Sodium/potassium-transporting ATPase 1b        | Atp1b1     | biological adhesion;cell adhesion;cellular process                           | active transmembrane transporter activity;ATPase activity                         | apical plasma membrane;basolateral plasma membrane                                                        | Allosteric regulation of sodium reabsorption;Biliverdin reductase activity   |
| Gamma-interferon-inducible protein 30          | Irfi30     | antigen processing and presentation;antigen presentation                     | catalytic activity;disulfide oxidoreductase activity                              | cell junction;cell part;cytoplasmic part;extracellular matrix                                             | Antigen processing and presentation                                          |
| Histone H1.3                                   | Hist1h1d   | binding of sperm to zona pellucida;cell differentiation                      | binding;DNA binding;nucleic acid binding                                          | cell part;chromatin;chromosomal part;chromosome                                                           |                                                                              |
| High mobility group protein 1                  | Hmg1a      | aging;biological regulation;biosynthetic process                             | binding;cytokine activity;extracellular matrix binding                            | cell part;chromatin;chromosomal part;heterocytosol                                                        |                                                                              |
| Alpha-galactosidase A                          | Gla        | biological regulation;carbohydrate catabolic process                         | alpha-galactosidase activity;binding;carbohydrate                                 | cell part;cytoplasmic part;extracellular region;extracellular matrix                                      | Galactose metabolism;Glycerolipid metabolism                                 |
| Secretory carrier-associated protein 1         | Scamp1     | cellular component organization;cellular component                           | receptor activity                                                                 | cell part;clathrin coated vesicle membrane;coated pit                                                     | Axon guidance                                                                |
| Semaphorin-3G                                  | Sema3g     | developmental process;multicellular organism development                     | receptor activity                                                                 | cell part;extracellular region;membrane                                                                   |                                                                              |
| Macrophage colony-stimulating factor 1         | Csf1       | adipose tissue development;anatomical structure development                  | active transmembrane transporter activity;adenyl nucleotide binding               | cell part;cytoplasmic part;extracellular region                                                           | Cytokine-cytokine receptor interaction;Hematopoiesis                         |
| Antigen peptide transport                      | Tap1       | antigen processing and presentation;antigen presentation                     | active transmembrane transporter activity;adenyl nucleotide binding               | cell part;cytoplasmic part;cytoplasmic vesicle                                                            | ABC transporters;Antigen processing and presentation                         |
| H/ACA ribonucleoprotein complex                | Dkc1       | cellular macromolecule metabolic process;cellular component assembly         | binding;carbon-oxygen lyase activity;catalytic activity                           | Cajal body;cell part;intracellular non-membrane-bounded organelle                                         | Ribosome biogenesis in eukaryotes                                            |
| Osteopontin                                    | Spp1       | anatomical structure development;biological process                          | binding;cytokine activity;extracellular matrix binding                            | apical part of cell;cell part;cell projection;cytoplasmic part                                            | ECM-receptor interaction;Focal adhesion;Toll-like receptor signaling pathway |
| Histone H1.5                                   | Hist1h1b   | anatomical structure development;cellular component                          | binding;DNA binding;nucleic acid binding                                          | cell part;chromosomal part;intracellular membrane                                                         |                                                                              |
| Beta-2-microglobulin                           | B2m        | antigen processing and presentation;antigen presentation                     | binding;nucleic acid binding                                                      | cell part;cytoplasmic part;cytoplasmic vesicle                                                            | Antigen processing and presentation                                          |
| Serine/arginine-rich splicing factor 7         | Srsf7      | biological regulation;cellular macromolecule metabolic process               | binding;cation binding;ion binding;metal ion binding                              | cell part;intracellular membrane-bounded organelle                                                        | Spliceosome                                                                  |
| Nephrin                                        | Nrme       | aging;amine metabolic process;anatomical structure development               | binding;catalytic activity;cation binding;endopeptidase activity                  | axon;brush border;cell part;cell projection;cell junction                                                 | Alzheimer's disease;Hematopoietic cell lineage;Phagosome                     |
| tRNA (cytosine34)-cystathionine synthase       | Cst3       | cell cycle phase;cell cycle process;cell division                            | binding;catalytic activity;methyltransferase activity                             | cell part;cytoplasm;cytoskeletal part;intracellular                                                       |                                                                              |
| Vascular endothelial growth factor 1           | Vegfa      | anatomical structure development;apoptosis;biological process                | beta-amyloid binding;binding;cysteine-type endopeptidase activity                 | basement membrane;cell body;cell part;cell projection                                                     | Salivary secretion                                                           |
| Vasorin                                        | Vasn       | activation of protein kinase activity;adaptive immune response               | binding;carbohydrate binding;chemoattractant activity                             | basement membrane;cell part;cell surface;cytoplasm                                                        | Bladder cancer;Cytokine-cytokine receptor interaction                        |
| Heterogeneous nuclear RNA                      | Hnrrnp1    | cellular component organization;cellular component                           | binding;DNA binding;nucleic acid binding;nucleotide binding                       | cell part;cytoplasm;intracellular membrane-bounded organelle                                              | Spliceosome                                                                  |
| Histone H3.1                                   | Hist1h3a   | biological regulation;cellular component assembly                            | binding;DNA binding;nucleic acid binding                                          | cell part;chromosomal part;intracellular organelle                                                        | Systemic lupus erythematosus                                                 |
| Arylsulfatase A                                | Arsa       | binding of sperm to zona pellucida;cell recognition                          | binding;calcium ion binding;catalytic activity;cellular component assembly        | cell part;cytoplasmic part;integral to membrane                                                           | Lysosome;Sphingolipid metabolism                                             |
| DNA replication licensing factor 2             | Mcm2       | cell cycle;cellular component assembly;cellular component                    | adenyl nucleotide binding;adenyl ribonucleotide binding                           | cell part;chromatin;chromosomal part;intracellular                                                        | Cell cycle;Cell cycle - yeast;DNA replication;Meiosis                        |
| Transcobalamin-2                               | Tcn2       | cation transport;cellular metabolic process;cellular component organization  | binding;cation binding;cobalamin binding;ion binding                              | extracellular region                                                                                      | Vitamin digestion and absorption                                             |
| Nucleolar protein 58                           | Nop58      | cellular component biogenesis;cellular component organization                | binding;nucleic acid binding;ribonucleoprotein binding                            | Cajal body;cell part;cytoplasm;intracellular non-membrane-bounded organelle                               | Ribosome biogenesis in eukaryotes                                            |
| Heterogeneous nuclear RNA                      | Hnrrnp2    | biological regulation;cellular process;cellular process                      | catalytic activity;cysteine-type endopeptidase activity                           | cell part;cytoplasmic membrane-bounded vesicle                                                            | Antigen processing and presentation;Lysosome                                 |
| Cathepsin B                                    | Ctsb       | cell cycle;cellular process                                                  | binding;DNA binding;nucleic acid binding                                          | cell part;chromosomal part;intracellular membrane-bounded organelle                                       |                                                                              |
| Enhancer of rudimentation 1                    | Hist1h1e   | cellular component assembly;cellular component assembly                      | binding;DNA binding;nucleic acid binding                                          | cell part;chromosomal part;intracellular membrane-bounded organelle                                       | Systemic lupus erythematosus                                                 |
| Histone H2B type 1-C                           | Hist1h2bc  | cellular component assembly;cellular component assembly                      | binding;DNA binding;nucleic acid binding                                          | cell part;chromosomal part;intracellular membrane-bounded organelle                                       | Systemic lupus erythematosus                                                 |
| Histone H2A;Histone H2AF                       | H2afy      | cellular component assembly;cellular component assembly                      | binding;DNA binding;nucleic acid binding                                          | cell part;chromosomal part;intracellular membrane-bounded organelle                                       | Systemic lupus erythematosus                                                 |
| Heterogeneous nuclear RNA                      | Hnrrnp2b1  | biological regulation;cellular macromolecule metabolic process               | binding;DNA binding;nucleic acid binding;nucleotide binding                       | catalytic step 2 spliceosome;cell part;cytoplasm                                                          |                                                                              |
| C-type mannose receptor                        | Mrc2       | cellular component organization;cellular component organization              | binding;carbohydrate binding;collagen binding                                     | cell part;cell surface;integral to membrane;intracellular                                                 | ko05152;Phagosome                                                            |
| Matrix Gla protein                             | Mgp        | anatomical structure development;biological process                          | binding;calcium ion binding;cation binding;ion binding                            | extracellular matrix;extracellular region;extracellular matrix                                            |                                                                              |
| Histone H4                                     | Hist1h4a   | biological regulation;cellular component assembly                            | binding;DNA binding;nucleic acid binding                                          | cell part;chromosomal part;intracellular membrane-bounded organelle                                       | Systemic lupus erythematosus                                                 |
| Histone H2A.V;Histone H2AF                     | H2afy      | cellular component assembly;cellular component assembly                      | binding;DNA binding;nucleic acid binding                                          | cell part;chromosomal part;intracellular membrane-bounded organelle                                       | Systemic lupus erythematosus                                                 |
| Histone H1.2                                   | Hist1h1c   | cellular component assembly;cellular component assembly                      | binding;DNA binding;nucleic acid binding                                          | cell part;chromosomal part;intracellular membrane-bounded organelle                                       |                                                                              |
| Syndecan-4                                     | Sdc4       | anatomical structure development;biological process                          | binding;nucleic acid binding;receptor activity                                    | adherens junction;anchoring junction;cell junction                                                        | Cell adhesion molecules (CAMs);ECM-receptor interaction                      |
| Splicing factor, proline- and serine-rich 4    | Sfqa       | alternative nuclear mRNA splicing, via spliceosome                           | binding;DNA binding;nucleic acid binding;nucleotide binding                       | cell part;cytoplasm;intracellular organelle part;intracellular                                            |                                                                              |
| Fractalkine                                    | Cx3cl1     | anatomical structure formation involved in morphogenesis                     | binding;chemokine activity;chemokine receptor activity                            | cell part;cell surface;extracellular region part;extracellular matrix                                     | Chemokine signaling pathway;Cytokine-cytokine receptor interaction           |
| Protein SET (Fragment)                         | Set        | biological regulation;cellular component assembly                            | binding;DNA binding;nucleic acid binding                                          | cell part;cytoplasmic part;cytosol;endoplasmic reticulum                                                  |                                                                              |
| Gamma-glutamyl hydrolase                       | Ggh        | amine metabolic process;carboxylic acid metabolic process                    | catalytic activity;exopeptidase activity;gamma-glutamyl aminotransferase activity | cell part;cytoplasmic membrane-bounded vesicle                                                            | Folate biosynthesis                                                          |
| Hypermethylated in cancer 2                    | Hic2       | biological regulation;biosynthetic process;cellular component assembly       | binding;cation binding;DNA binding;ion binding                                    | adherens junction;anchoring junction;cell junction                                                        |                                                                              |
| Spliceosome RNA helicase                       | Ddx39b     | cellular component assembly;cellular component organization                  | adenyl nucleotide binding;adenyl ribonucleotide binding                           | cell part;cytoplasm;intracellular organelle part;intracellular                                            | mRNA surveillance pathway;RNA transport;Splicing factor                      |
| High mobility group protein 1                  | Hmg2       | adipose tissue development;adrenal gland development                         | 5'-deoxyribose-5-phosphate lyase activity;ATPase activity                         | cell part;chromatin;chromosomal part;chromosome                                                           |                                                                              |
| Serine/arginine-rich splicing factor 3         | Srsf3      | biological regulation;cell surface receptor linkage                          | binding;nucleic acid binding;nucleotide binding                                   | cell part;intracellular organelle part;intracellular                                                      | Spliceosome                                                                  |
| Protein RCC2                                   | Rcc2       | cell cycle phase;cell cycle process;cell division                            | binding;nucleic acid binding;nucleotide binding                                   | cell part;chromosomal part;chromosome, centromere                                                         |                                                                              |
| Glutathione peroxidase 4                       | Gpx4       | cellular component organization;cellular component organization              | antioxidant activity;catalytic activity;glutathione peroxidase activity           | cell part;cytoplasmic part;cytosol;envelope;intracellular                                                 | Glutathione metabolism                                                       |
| Pentraxin-related protein 3                    | Ptx3       | biological regulation;immune effector process                                | binding;1,3-beta-D-glucan binding;binding;carbohydrate                            | extracellular region                                                                                      |                                                                              |
| Splicing factor 3B subunit 1                   | Sf3b1      | anterior/posterior pattern specification;cellular component organization     | binding;chromatin binding                                                         | catalytic step 2 spliceosome;cell part;intracellular                                                      | Spliceosome                                                                  |
| Carboxypeptidase-LysC                          | Ctcla      | macromolecule metabolic process;metabolic process                            | carboxypeptidase activity;catalytic activity;exopeptidase activity                | cell part;cytoplasmic part;intracellular membrane-bounded organelle                                       | Lysosome;Renin-angiotensin system                                            |
| Serine/arginine-rich splicing factor 1         | Srsf1      | biological regulation;cardiac muscle contraction                             | binding;nucleic acid binding;nucleotide binding                                   | catalytic step 2 spliceosome;cell part;cytoplasm                                                          | Spliceosome                                                                  |
| Vesicle transport protein 1                    | Golt1b     | biological regulation;cellular process;establishment of biological potential | molecular transducer activity;signal transducer activity                          | cell part;cytoplasmic part;endoplasmic reticulum                                                          |                                                                              |
| Angiotensin-converting enzyme 2                | Ace2       | aging;anatomical structure development;anatomical structure                  | binding;carboxypeptidase activity;catalytic activity                              | cell part;extracellular region;integral to membrane                                                       | Chagas disease (American trypanosomiasis);Hypertension                       |
| Calysentinin-1                                 | Cltn1      | biological adhesion;biological regulation;calcium ion binding                | binding;calcium ion binding;cation binding;ion binding                            | cell junction;cell part;cell projection;cytoplasm                                                         |                                                                              |
| Carboxypeptidase Q                             | Cpq        | alcohol metabolic process;amine metabolic process                            | binding;carboxypeptidase activity;catalytic activity                              | cell part;cytoplasmic part;endoplasmic reticulum                                                          |                                                                              |
| Hepatitis B virus protein X                    | Hdgf       | biological regulation;biosynthetic process;cellular component assembly       | binding;carbohydrate binding;DNA binding;glycosaminoglycan binding                | cell part;cytoplasm;extracellular region part;extracellular matrix                                        |                                                                              |
| RNA-binding protein 39                         | Rbm39      | biological regulation;biosynthetic process;cellular component assembly       | binding;nucleic acid binding;nucleotide binding                                   | cell part;centrosome;cytoplasmic part;cytoskeleton                                                        |                                                                              |
| Zinc transporter 7                             | Slc30a7    | biological regulation;cation transport;divalent cation transport             | binding;cation binding;cation transmembrane transporter activity                  | cell part;cytoplasmic membrane-bounded vesicle                                                            |                                                                              |
| DEAD (Asp-Glu-Ala-Asp) domain protein 6        | Ddx5       | biological regulation;biosynthetic process;cellular component assembly       | adenyl nucleotide binding;adenyl ribonucleotide binding                           | catalytic step 2 spliceosome;cell part;intracellular                                                      | Spliceosome                                                                  |
| Heterogeneous nuclear RNA                      | Hnrrnp3    | biological adhesion;biological regulation;cellular component organization    | catalytic activity;disulfide oxidoreductase activity                              | cell part;cytoplasmic membrane-bounded vesicle                                                            | Protein processing in endoplasmic reticulum                                  |
| Parathyroid hormone-related protein            | Pthrrp     | cellular macromolecule metabolic process;cellular component assembly         | binding;mRNA binding;nucleic acid binding;nucleotide binding                      | catalytic step 2 spliceosome;cell part;intracellular                                                      | Spliceosome                                                                  |
| Histone H1.0                                   | H1f0       | cellular component assembly;cellular component assembly                      | binding;DNA binding;nucleic acid binding                                          | cell part;chromatin;chromosomal part;cytoplasm                                                            |                                                                              |
| Histone H1.3                                   | Pik3r4     | adenyl nucleotide binding;adenyl ribonucleotide binding                      | binding;adenyl nucleotide binding;nucleotide binding                              | cell part;cytoplasmic part;endosome;intracellular                                                         | Regulation of autophagy                                                      |
| Phosphoinositide 3-kinase                      | Pik3r4     | adenyl nucleotide binding;adenyl ribonucleotide binding                      | binding;adenyl nucleotide binding;nucleotide binding                              | catalytic step 2 spliceosome;cell part;intracellular                                                      | Spliceosome                                                                  |
| Heterogeneous nuclear RNA                      | Hnrrnp4    | alternative nuclear mRNA splicing, via spliceosome                           | binding;nucleic acid binding;nucleotide binding                                   | catalytic step 2 spliceosome;cell part;intracellular                                                      | Spliceosome                                                                  |
| Heterogeneous nuclear RNA                      | Hnrrnp5    | 3'-UTR-mediated mRNA stabilization;biological process                        | AU-rich element binding;binding;nucleic acid binding                              | cell part;intracellular membrane-bounded organelle                                                        |                                                                              |
| Acidic leucine-rich nuclear phosphoprotein 32e | Anp32e     | enzyme inhibitor activity;enzyme regulator activity                          | binding;enzyme inhibitor activity;enzyme regulator activity                       | cell part;cytoplasmic membrane-bounded vesicle                                                            |                                                                              |
| Heterogeneous nuclear RNA                      | Hnrrnp6    | biological regulation;cellular macromolecule metabolic process               | adenyl nucleotide binding;adenyl ribonucleotide binding                           | catalytic step 2 spliceosome;cell part;cell surface                                                       | Spliceosome                                                                  |
| WNT1 inducible signaling pathway protein 2     | Wisp2      | biological adhesion;biological regulation;cellular component organization    | binding;growth factor activity;protein binding                                    | cell part;extracellular region;extracellular region                                                       |                                                                              |
| Small ubiquitin-related protein 3              | Sumo3      | biological regulation;cellular localization;cellular component organization  | acid-amino acid ligase activity;binding;catalytic activity                        | cell part;cytoplasm;intracellular organelle part;intracellular                                            | RNA transport                                                                |
| Acidic leucine-rich nuclear phosphoprotein 32b | Anp32b     | anatomical structure development;developmental process                       | adenyl nucleotide binding;adenyl ribonucleotide binding                           | cell part;intracellular membrane-bounded organelle                                                        |                                                                              |
| DNA replication licensing factor 3             | Mcm3       | cell cycle;cellular macromolecule metabolic process                          | adenyl nucleotide binding;adenyl ribonucleotide binding                           | cell part;centrosome;chromosomal part;cytoplasm                                                           | Cell cycle;Cell cycle - yeast;DNA replication;Meiosis                        |
| DNA replication licensing factor 7             | Mcm7       | biological regulation;cell cycle;cell proliferation                          | adenyl nucleotide binding;adenyl ribonucleotide binding                           | cell part;chromosomal part;cytoplasmic part;cytoskeleton                                                  | Cell cycle;Cell cycle - yeast;DNA replication;Meiosis                        |
| Cystatin A                                     | Csta       | anatomical structure development;developmental process                       | cysteine-type endopeptidase inhibitor activity;binding                            | cell part;cornified envelope;cytoskeleton;intracellular                                                   |                                                                              |
| RNA-binding protein E1                         | Ewrs1      | biological regulation;biosynthetic process;cellular component assembly       | binding;cation binding;ion binding;metal ion binding                              | cell part;cytoplasm;intracellular membrane-bounded organelle                                              |                                                                              |
| Beta-hexosaminidase S                          | Hexb       | amine metabolic process;aminoglycan metabolic process                        | beta-N-acetylhexosaminidase activity;binding                                      | acrosomal vesicle;cell part;cytoplasmic membrane-bounded organelle                                        | Amino sugar and nucleotide sugar metabolism;                                 |
| Non-POU domain-containing protein 1            | Nono       | biological regulation;biosynthetic process;cellular component assembly       | binding;DNA binding;nucleic acid binding;nucleotide binding                       | cell part;intracellular non-membrane-bounded organelle                                                    |                                                                              |
| Ceruloplasmin                                  | Cp         | biological regulation;cation homeostasis;cation transport                    | binding;catalytic activity;cation binding;copper binding                          | extracellular region part;extracellular space                                                             | Porphyrin and chlorophyll metabolism                                         |
| Small nuclear ribonucleoprotein D              | Snrpd1     | cellular macromolecule metabolic process;cellular component organization     | adenyl nucleotide binding;adenyl ribonucleotide binding                           | catalytic step 2 spliceosome;cell part;cytoplasm                                                          | Spliceosome;Systemic lupus erythematosus                                     |
| Laminin subunit gamma 1                        | Lamc1      | anatomical structure morphogenesis;biological process                        | binding;extracellular matrix structural constituent activity                      | extracellular matrix part;extracellular membrane                                                          | Amoebiasis;ECM-receptor interaction;Focal adhesion                           |
| WASH complex subunit 3                         | Wash3      | cellular component organization;cellular component organization              | binding;calcium ion binding;cation binding;DNA binding                            | cell part;cytoplasmic part;cytoskeleton;endoplasmic reticulum                                             |                                                                              |
| Nucleobindin-1;Nucleolin                       | Nucb1      | biological regulation;cellular component organization                        | binding;calcium ion binding;cation binding;DNA binding                            | cell part;cytoplasmic part;cytoskeleton;endoplasmic reticulum                                             |                                                                              |
| Proliferating cell nuclear antigen             | Pcna-ps2   | base-excision repair, gap-filling;biological regulation                      | binding;DNA binding;DNA polymerase process                                        | cell part;chromosomal part;cyclin-dependent protein complex                                               | Base excision repair;Cell cycle;DNA replication;                             |
| MG21719;Regulator of G-protein signaling 5     | Lamtors5   | biological regulation;cellular component organization                        | enzyme regulator activity;GTPase regulator activity                               | cell part;cytoplasmic part;cytosol;endoplasmic reticulum                                                  |                                                                              |
| rRNA 2-O-methyltransferase                     | Fbl        | cellular macromolecule metabolic process;cellular component organization     | binding;catalytic activity;methyltransferase activity                             | Cajal body;cell part;dense fibrillar component                                                            | Ribosome biogenesis in eukaryotes                                            |

|                                               |               |                                                    |                                                    |                                                    |                                                     |
|-----------------------------------------------|---------------|----------------------------------------------------|----------------------------------------------------|----------------------------------------------------|-----------------------------------------------------|
| Beta-glucuronidase                            | Gusb          | carbohydrate metabolic process;metabolic pro       | beta-glucuronidase activity;catalytic activity;hy  | cell part;cytoplasmic part;endoplasmic reticul     | Drug metabolism - other enzymes;Flavone and         |
| Collagen alpha-1(V) chain                     | Col5a1        | anatomical structure development;anatomical        | binding;carbohydrate binding;extracellular ma      | basement membrane;collagen;collagen type V         | Amoebiasis;ECM-receptor interaction;Focal ad        |
| Heterogeneous nucleolar protein               | Hnrnpd        | biological regulation;biosynthetic process;cellu   | binding;DNA binding;nucleic acid binding;nucle     | cell part;cytoplasm;intracellular membrane-bo      |                                                     |
| Transaldolase                                 | Taldo1        | alcohol metabolic process;carbohydrate metab       | binding;carbohydrate binding;catalytic activity    | cell part;cytoplasmic part;cytosol;intracellular   | Pentose phosphate pathway                           |
| Small nuclear ribonucleoprotein               | Snrpd2        | cellular macromolecule metabolic process;cell      |                                                    | catalytic step 2 spliceosome;cell part;intracellu  | Spliceosome                                         |
| Protein canopy homolog                        | Cnpyp3        | defense response;immune response;immune s          |                                                    | cell part;cytoplasmic part;endoplasmic reticul     |                                                     |
| Nucleobindin-2                                | Nucb2         | biological regulation;calcium ion homeostasis;     | binding;calcium ion binding;cation binding;DNA     | cell part;cytoplasmic part;endoplasmic reticul     |                                                     |
| Regulator complex protein                     | Lamt0r2       | activation of MAPK activity;activation of prote    | enzyme regulator activity;GTPase regulator act     | cell part;cytoplasmic part;endosomal part;end      |                                                     |
| ATP-dependent RNA helicase                    | Ddx39a;Ddx39b | cellular macromolecule metabolic process;cell      | adenyl nucleotide binding;adenyl ribonucleoti      | cell part;cytoplasm;intracellular membrane-bo      |                                                     |
| Semaphorin-3A (Fragm)                         | Sema3a        | ameboidal cell migration;anatomical structure      | chemorepellent activity;receptor activity          | axon;cell part;cell projection;dendrite;extracel   | Axon guidance                                       |
| Twisted gastrulation protein                  | Twsig1        | anatomical structure development;anatomical        |                                                    | extracellular region part;extracellular space      |                                                     |
| Heterogeneous nucleolar protein               | Hnrnph1       | biological regulation;cellular macromolecule m     | binding;nucleic acid binding;nucleotide binding    | actin cytoskeleton;catalytic step 2 spliceosome    |                                                     |
| Heterogeneous nucleolar protein               | Hnrnpab       | anatomical structure morphogenesis;biological      | binding;DNA binding;nucleic acid binding;nucle     | cell part;cytoplasm;intracellular membrane-bo      |                                                     |
| V-type proton ATPase                          | Atp6v1c1      | ATP hydrolysis coupled proton transport;cation     | active transmembrane transporter activity;ATP      | apical part of cell;cell part;cytoplasmic part;cyt | Collecting duct acid secretion;Epithelial cell sigr |
| Podoplanin                                    | Pdpn          | anatomical structure development;anatomical        |                                                    | apical plasma membrane;cell part;cell projecti     |                                                     |
| Lysosomal alpha-glucosidase                   | Gaa           | anatomical structure development;anatomical        | alpha-glucosidase activity;binding;carbohydrat     | cell part;cytoplasmic part;intracellular membra    | Galactose metabolism;Lysosome;Starch and su         |
| Phospholipid scramblase                       | Plscr2        | cellular process;cellular response to biotic stim  | binding;cation binding;ion binding;metal ion bi    | cell part;cytoplasm;integral to membrane;intra     |                                                     |
| N(4)-(beta-N-acetyl)glucosaminase             | Agaa          | cellular macromolecule metabolic process;cell      | asparaginase activity;catalytic activity;hydrolas  | cell part;cytoplasmic part;endoplasmic reticul     | Lysosome;Other glycan degradation                   |
| Myb-binding protein 1                         | Mybbp1a       | biological regulation;biosynthetic process;cell    | binding;catalytic activity;cation binding;DNA bi   | cell part;cytoplasm;intracellular non-membran      |                                                     |
| Choline transporter-like 1                    | Slc44a1       | active transmembrane transporter activity;ami      | binding;nucleic acid binding;nucleotide binding    | cell part;cytoplasmic part;integral to membran     |                                                     |
| RNA-binding protein FUS                       | Fus           | binding;cation binding;DNA binding;ion binding     |                                                    | cell part;cytoplasm;intracellular membrane-bo      |                                                     |
| MCG8382, isoform CRA B                        | Gm21992;Rbrn  | biological regulation;biosynthetic process;cellu   | binding;cation binding;ion binding;ligand-depe     | cell part;intracellular non-membrane-bounded       |                                                     |
| Cbx3 protein;Chromobox 3                      | Cbx3          | biological regulation;biosynthetic process;cellu   | binding;chromatin binding;histone binding;me       | cell part;centromeric heterochromatin;chroma       |                                                     |
| Protein ERGIC-53                              | Lman1         | biological regulation;cellular component organ     | binding;cation binding;ion binding;metal ion bi    | cell part;contractile fiber part;cytoplasmic part  | Protein processing in endoplasmic reticulum         |
| Epididymal secretory protein                  | Npc2          | alcohol metabolic process;biological regulatio     | binding;cholesterol binding;lipid binding;sterol   | cell part;cytoplasmic part;endoplasmic reticul     | Lysosome                                            |
| Small nuclear ribonucleoprotein               | Snrpe         | cellular macromolecule metabolic process;cell      | binding;nucleic acid binding;RNA binding           | catalytic step 2 spliceosome;cell part;intracellu  | Spliceosome                                         |
| Heterogeneous nucleolar protein               | Hnrnrf        | biological regulation;cellular macromolecule m     | binding;nucleic acid binding;nucleotide binding    | cell part;intracellular organelle part;intracellu  |                                                     |
| SPARC                                         | Sparc         | anatomical structure development;biological r      | binding;calcium ion binding;cation binding;extr    | basement membrane;cell part;cytoplasm;extra        |                                                     |
| Mammalian epidymidial secretory protein       | Epdrl         | biological adhesion;cell adhesion;cell-matrix a    | binding;calcium ion binding;cation binding;ion     | cell part;cytoplasmic part;extracellular region;in |                                                     |
| Collagen C-endopeptidase                      | Pcolce        | macromolecule metabolic process;metabolic p        | binding;carbohydrate binding;collagen binding      | extracellular matrix;extracellular membrane-bo     |                                                     |
| Lupus L1 protein homolog                      | Ssb           | cellular macromolecule metabolic process;cell      | binding;nucleic acid binding;nucleotide binding    | cell part;intracellular membrane-bounded orga      | Systemic lupus erythematosus                        |
| Prelamin-A/C                                  | Lmna          | anatomical structure development;biological r      | structural molecule activity                       | cell part;cytoplasmic part;cytoskeletal part;env   | Arrhythmogenic right ventricular cardiomyopat       |
| Cathepsin D;Uncharacterized                   | Ctsd          | autophagic vacuole assembly;cellular compone       | aspartic-type endopeptidase activity;aspartic-t    | cell part;cytoplasmic membrane-bounded vesic       | ko05152;Lysosome                                    |
| Endothelial cell-specific protein             | Esm1          | anatomical structure formation involved in mo      |                                                    | extracellular region                               |                                                     |
| Insulin-like growth factor 1                  | Igf1bp4       | biological regulation;cell proliferation;defens    |                                                    | extracellular region part;extracellular space      |                                                     |
| Predicted pseudogene                          | Gm9242;Gm9243 | cellular macromolecule metabolic process;cell      | binding;nucleic acid binding;nucleotide binding    | catalytic step 2 spliceosome;cell part;intracellu  | Spliceosome                                         |
| Alpha-N-acetylglucosaminase 2                 | Naglu         | anatomical structure development;anatomical        |                                                    | cell part;cytoplasmic part;endoplasmic reticul     | Glycosaminoglycan degradation;Lysosome              |
| Mannosyl-oligosaccharinase                    | Mogs          | carbohydrate metabolic process;metabolic pro       | catalytic activity;glucosidase activity;hydrolas   | cell part;cytoplasmic part;endoplasmic reticul     | N-Glycan biosynthesis;Protein processing in en      |
| Beta-hexosaminidase 5                         | Hexa          | adult behavior;adult locomotory behavior;adu       | binding;nucleic acid binding;nucleotide binding    | cell part;cytoplasmic part;intracellular membra    | Amino sugar and nucleotide sugar metabolism;        |
| Tubulin gamma-1 chain                         | Tubg1;Tubg2   | biological regulation;cell cycle process;cellula   | binding;catalytic activity;GTP binding;GTPase a    | apical part of cell;cell leading edge;cell part;c  |                                                     |
| Peptidyl-prolyl cis-trans isomerase           | Ppiib         | cellular macromolecule metabolic process;cell      | binding;catalytic activity;cis-trans isomerase ac  | cell part;cytoplasmic membrane-bounded vesic       |                                                     |
| Adipocyte enhancer-1                          | Aebp1         | biological adhesion;biological regulation;biosy    | binding;carboxypeptidase activity;catalytic acti   | cell part;cytoplasm;extracellular matrix;extrac    |                                                     |
| Nucleophosmin                                 | Npm1          | aging;biological regulation;cell aging;cell cycle  | binding;DNA binding;enzyme inhibitor activity;     | cell part;centrosome;cytoplasmic part;cytoske      |                                                     |
| Beta-galactosidase                            | Gbl1          | alcohol catabolic process;alcohol metabolic pr     | beta-galactosidase activity;binding;carbohydr      | cell part;cytoplasmic part;intracellular membra    | Galactose metabolism;Glycosaminoglycan degra        |
| Splicing factor 3B subunit 5                  | Sf3b3         | cellular macromolecule metabolic process;cell      | binding;nucleic acid binding                       | catalytic step 2 spliceosome;cell part;intracellu  | Spliceosome                                         |
| ATP-dependent RNA helicase                    | Dhx9          | biological regulation;cellular macromolecule m     | adenyl nucleotide binding;adenyl ribonucleoti      | cell part;centrosome;CRD-mediated mRNA stat        |                                                     |
| Heterogeneous nucleolar protein               | Hnrnpl        | cellular macromolecule metabolic process;cell      | binding;DNA binding;nucleic acid binding;nucle     | cell part;cytoplasm;intracellular membrane-bo      |                                                     |
| Arylsulfatase B                               | Ar5b          | anatomical structure development;autophagy;        | arylsulfatase activity;binding;catalytic activity; | cell part;cytoplasmic part;endoplasmic reticul     | Glycosaminoglycan degradation;Lysosome              |
| Transmembrane protein 206                     | Tmem206       | amine metabolic process;aminoglycan metabo         | binding;catalytic activity;cation binding;hydrol   | cell part;cytoplasmic part;intracellular membra    | Glycosaminoglycan degradation;Lysosome              |
| N-acetylglucosaminase 6                       | Gns           | activation of caspase activity;aggresome assem     | adenyl nucleotide binding;adenyl ribonucleoti      | cell part;chromosomal part;cytoplasmic part;cy     | Protein processing in endoplasmic reticulum         |
| Transitional endoplasmic reticulum chaperone  | Vcp           | cellular component organization;cellular comp      | 1-phosphatidylinositol binding;binding;cation      | cell part;cytoplasmic part;cytosol;early endoso    | Endocytosis;ko05152;Phagosome                       |
| MCG134445, isoform C                          | Mroh1         | 3'-UTR-mediated mRNA stabilization;biological      | binding;DNA binding;double-stranded DNA bin        | cell part;intracellular membrane-bounded orga      |                                                     |
| Small nuclear ribonucleoprotein               | Snrnpb        | biological regulation;cell cycle phase;cell cycle  | binding;GTP binding;guanyl nucleotide binding      | cell part;cytoplasmic part;cytoskeletal part;end   |                                                     |
| ADP-ribosylation factor 1                     | Arl8a         | cellular macromolecule metabolic process;cell      | binding;histone pre-mRNA DCP binding;nucleic       | catalytic step 2 spliceosome;cell part;cytoplasm   | Spliceosome;Systemic lupus erythematosus            |
| Histone-binding protein                       | Rbbp4         | biological regulation;biosynthetic process;cell    | ATPase activity;ATPase activity, coupled;cataly    | CAF-1 complex;cell part;chromatin assembly co      |                                                     |
| NADH-cytochrome b5                            | Cyb5r1        | alcohol metabolic process;biosynthetic process     | catalytic activity;cytochrome-b5 reductase act     | cell part;cytoplasmic part;integral to membran     | Amino sugar and nucleotide sugar metabolism         |
| Lysosomal acid phosphatase                    | Acp2          | anatomical structure development;cellular comp     | acid phosphatase activity;catalytic activity;hyd   | cell part;cytoplasmic part;integral to membran     | Riboflavin metabolism                               |
| Oligosaccharyl transferase                    | Ostc          | cellular process;ER to Golgi vesicle-mediated tr   | binding;cation binding;ion binding;metal ion bi    | cell part;integral to membrane;intrinsic to men    |                                                     |
| Protein transport protein                     | Sec23a        | amylloid precursor protein catabolic process;an    |                                                    | cell part;COPII vesicle coat;cytoplasmic part;cyt  | Protein processing in endoplasmic reticulum         |
| Transmembrane emp24 protein                   | Tmed10        | alcohol biosynthetic process;alcohol metabolic     | catalytic activity;ceramidase activity;glucosylce  | cell part;cis-Golgi network;clathrin-coated vesic  |                                                     |
| Glucosylceramidase                            | Gba           | cellular macromolecule metabolic process;cell      | binding;histone pre-mRNA DCP binding;nucleic       | cell part;cytoplasmic part;intracellular organelle | Lysosome;Other glycan degradation;Sphingolip        |
| Small nuclear ribonucleoprotein               | Snrpd3        | biological regulation;cell growth;cellular comp    | enzyme regulator activity;GTPase regulator act     | catalytic step 2 spliceosome;cell part;cytoplasm   | Spliceosome;Systemic lupus erythematosus            |
| Regulator complex protein                     | Lamt0r1       | biological regulation;cellular macromolecule m     | carbon-carbon lyase activity;carboxy-lyase acti    | cell part;cytoplasmic part;endosomal part;Golg     |                                                     |
| D-dopachrome decarboxylase                    | Ddt;Gm20441   | biological regulation;cellular biosynthetic proc   | binding;NF-kappaB binding;protein binding;pr       | apical plasma membrane;cell junction;cell part     |                                                     |
| Protein LYRIC                                 | Mtdh          | anatomical structure morphogenesis;behavior        | binding;extracellular matrix structural constitu   | cell part;cytoplasmic part;extracellular matrix p  | Amoebiasis;ECM-receptor interaction;Focal ad        |
| Laminin subunit beta-1                        | Lamb1         | biological regulation;cellular macromolecule m     | binding;core promoter proximal region DNA bi       | catalytic step 2 spliceosome;cell junction;cell p  | Spliceosome                                         |
| Heterogeneous nucleolar protein               | Hnrnkp        | anterograde axon cargo transport;axon cargo        | adenyl nucleotide binding;adenyl ribonucleoti      | cell body;cell part;cell projection;cytoplasm;cyt  |                                                     |
| Kinesin-like protein KIF1A                    | Kif1a         | cellular component organization;cellular comp      |                                                    | cell part;cis-Golgi network;cytoplasmic part;env   |                                                     |
| Transmembrane emp24 protein                   | Tmed5         | cellular component assembly;cellular compone       |                                                    | cell part;cytoplasmic membrane-bounded vesic       |                                                     |
| Erythrocyte band 7 integral membrane protein  | Stom          | catabolic process;lipid catabolic process;lipid m  | catalytic activity;hydrolase activity              | cell part;cytoplasmic part;intracellular membra    |                                                     |
| Putative phospholipase                        | Pldb2         | biological regulation;positive regulation of biol  | binding;calcium ion binding;cation binding;extr    | extracellular matrix;extracellular region part;pr  |                                                     |
| Fibulin-2                                     | Fbln2         | biological regulation;cellular component organ     | binding;carbohydrate binding;cation binding;D      | apical part of cell;axon;cell part;cell projectio  | Alzheimer's disease                                 |
| Transmembrane emp24 protein                   | Tmed9         | adult behavior;adult locomotory behavior;alco      | 1-alkyl-2-acetylglucerocephosphocholine ester      | extracellular region part;low-density lipoprote    | Either lipid metabolism                             |
| Platelet-activating factor 1                  | Pla2g7        | biological regulation;catalytic process;cellular   | enzyme activator activity;enzyme regulator act     | apical plasma membrane;basement membrane           | Amoebiasis;Bacterial invasion of epithelial cells   |
| Fibronectin                                   | Fn1           | biological adhesion;calcium-independent cell-      |                                                    | cell part;cytoplasmic membrane-bounded vesic       |                                                     |
| Transmembrane protein                         | Tmem33        | binding;lipid binding;phospholipid binding         |                                                    | cell junction;cell part;cytoplasmic part;cytoplas  |                                                     |
| Beta-2-syntrophin                             | Sntb2         | catalytic activity;oxidoreductase activity;oxidor  | endopeptidase inhibitor activity;endopeptidase     | cell part;extracellular matrix;extracellular regio |                                                     |
| Thioredoxin domain-containing protein         | Txndc12       | biological regulation;cell redox homeostasis;ce    | binding;calcium ion binding;cation binding;ion     | cell part;extracellular matrix;extracellular regio |                                                     |
| Collagen, type VI, alpha 1                    | Col6a3        | biological regulation;blood coagulation;coagula    | binding;ribonucleoprotein binding;ribosome bi      | cell part;cytoplasmic part;endoplasmic reticul     | Phagosome;Protein export;Protein processing i       |
| EGF-containing fibulin-1                      | Efemp2        | catabolic process;cellular catabolic process;cell  | binding;nucleic acid binding;nucleotide binding    | cell part;cytoplasmic part;extracellular region    | Lysosome                                            |
| Protein transport protein                     | Sec61b;Gm1023 | biological regulation;cell differentiation;cellula |                                                    | mRNA surveillance pathway;RNA degradation;f        |                                                     |
| Prosaposin                                    | Pspap         | anatomical structure formation involved in mo      | binding;DNA binding;nucleic acid binding;nucle     | cell cortex;cell part;cytoplasmic part;intracellu  | Pathogenic Escherichia coli infection               |
| Polyadenylate-binding protein                 | Pabpc4;Pabpc5 | immune response;immune system process;ma           | binding;carbohydrate binding;cargo receptor        | cell part;cytoplasm;extracellular matrix;extrac    |                                                     |
| Nucleolin                                     | Ncl           | anatomical structure development;anatomical        | adenyl nucleotide binding;adenyl ribonucleoti      | cell part;cytoplasmic part;intracellular non-me    |                                                     |
| Tubulointerstitial nephritis susceptibility 2 | Hspg2         | aging;biological regulation;catabolic process;ce   | biological regulation;cell redox homeostasis;ce    | cell part;cell surface;cytoplasmic membrane-bo     | Protein processing in endoplasmic reticulum;Vi      |
| Protein disulfide-isomerase                   | Pdia4         | anatomical structure development;biological r      | binding;protein binding;SNARE binding;syntaxi      | apical plasma membrane;cell part;cytoplasmic       |                                                     |
| Syntaxin-binding protein                      | Stxbp3        | binding;calcium ion binding;cation binding;ion     |                                                    | cell part;cytoplasmic membrane-bounded vesic       |                                                     |
| Calumenin;Calumenin                           | Calu          | apoptosis;apoptosis in response to endoplasm       | binding;catalytic activity;coenzyme binding;col    | cell part;cytoplasmic part;endoplasmic reticul     | Protein processing in endoplasmic reticulum;Vi      |
| ERO1-like protein alpha                       | Ero1a         | biological regulation;blastocyst hatching;devel    |                                                    | cell part;cytoplasmic part;extracellular region p  |                                                     |
| Granulins;Granulins (Family 1)                | Grn           | cellular process;endosome transport;establis       | binding;calcium ion binding;calcium-dependen       | cell part;cytoplasmic part;early endosome;early    |                                                     |
| WASH complex subunit 2                        | Washc2        | cellular component organization;cellular comp      | binding;cation binding;copper ion binding;extr     | azurophilic granule;cell part;cytoplasm;cytoplasm  |                                                     |
| Annexin A11;Annexin                           | Anxa11        | anatomical structure formation involved in mo      | adenyl nucleotide binding;adenyl ribonucleoti      | anchored to membrane;cell part;cytoplasmic p       |                                                     |
| Glypican-1                                    | Gpc1          | activation of signaling protein activity involve   | adenyl nucleotide binding;adenyl ribonucleoti      | cell part;cell surface;cytoplasmic membrane-bo     | Prion diseases;Protein export;Protein processin     |
| 78 kDa glucose-regulated protein              | Hspa5         | biological regulation;calcium ion transport;cati   | binding;calcium ion binding;calcium-dependen       | cell part;cytoplasmic part;intracellular part;per  |                                                     |
| Annexin                                       | Anxa6         | actin cytoskeleton organization;actin filament     | binding;calcium ion binding;calcium-dependen       | cell part;cytoplasmic membrane-bounded vesic       | NOD-like receptor signaling pathway;Pathways        |
| Endoplasmin;Endoplasmic reticulum chaperone   | Hsp90b1       | biological adhesion;cell adhesion;cellular proc    | binding;calcium ion binding;calcium-dependen       | cell part;extracellular matrix;extracellular mem   |                                                     |
| Galectin-3-binding protein                    | Lgals3bp      | anatomical structure formation involved in mo      | amine metabolic process;amino acid activation      | basement membrane;cell part;cytoplasmic mem        |                                                     |
| Annexin A2;Annexin (Family 2)                 | Anxa2         | adenyl nucleotide binding;adenyl ribonucleoti      | alcohol biosynthetic process;alcohol catabolic     | cell part;cytoplasmic part;intracellular membra    | Aminoacyl-tRNA biosynthesis                         |
| Asparagine-tRNA ligase                        | Nars          | binding;2,3-bisphosphoglycerate-dependent phosphog |                                                    | cell part;cytoplasmic part;cytosol;intracellular   | Glycolysis / Gluconeogenesis;Methane metabo         |
| Phosphoglycerate mutase                       | Pgam1         |                                                    |                                                    |                                                    |                                                     |

|                                                     |                 |                                                                                            |                                                      |
|-----------------------------------------------------|-----------------|--------------------------------------------------------------------------------------------|------------------------------------------------------|
| Calpain small subunit 1                             | Capns1          | binding;calcium ion binding;calcium-dependen                                               | cell part;cytoplasm;intracellular part;membran       |
| Cytoplasmic dynein 1 heavy chain                    | Dync1h1         | ATP catabolic process;ATP metabolic process;biological regulation;biosynthetic process;car | cell part;cytoplasm;intracellular part;macro         |
| 40S ribosomal protein Rps6                          | Rps6            | structural constituent of ribosome;structural m                                            | cell part;intracellular non-membrane-bounde          |
| Ran-specific GTPase-associated protein              | Ranbp1          | enzyme activator activity;enzyme regulator act                                             | cell part;cytoplasm;cytoplasmic part                 |
| Phosphoserine aminotransferase                      | Psat1           | amine biosynthetic process;amine metabolic pr                                              |                                                      |
| Bifunctional glutamate epimerase                    | Eprs            | amine metabolic process;amino acid activation                                              | cell part;cytoplasm;intracellular part;macro         |
| Adenylyl cyclase-associated protein 1               | Cap1            | actin cytoskeleton organization;actin filament                                             | cell cortex part;cell part;cortical actin cytoskele  |
| Hypoxanthine-guanine phosphoribosyltransferase 1    | Hprt1           | adenine biosynthetic process;adenine metabol                                               | cell part;cytoplasmic part;cytosol;intracellular     |
| Elongation factor 1-alpha                           | Eef1a1          | biological regulation;catabolic process;cellular                                           | cell body;cell part;cytoplasm;cytoplasmic part       |
| D-3-phosphoglycerate kinase                         | Phgdh           | amine biosynthetic process;amine metabolic p                                               | binding;catalytic activity;coenzyme binding;cof      |
| Very-long-chain 3-oxoacyl-CoA synthase 1            | Hsd17b12        | biological regulation;biosynthetic process;car                                             | binding;carbohydrate binding;catalytic activity      |
| Lysine-tRNA ligase                                  | Kars            | amine metabolic process;amino acid activation                                              | aminoacyl-tRNA synthetase multi-enzyme comp          |
| Obg-like ATPase 1                                   | Ola1            | ATP catabolic process;ATP metabolic process;c                                              | cell part;cytoplasm;intracellular non-membran        |
| Cofilin-1                                           | Cfl1            | actin cytoskeleton organization;actin filament                                             | cell cortex part;cell part;cell projection;cell pro  |
| GTP-binding protein Sar1a                           | Sar1a           | cellular process;establishment of localization;e                                           | binding;GTP binding;guanyl nucleotide binding        |
| Glycine-tRNA ligase                                 | Gars            | amine metabolic process;amino acid activation                                              | cell part;cytoplasmic membrane-bounded vesic         |
| Cystatin-B                                          | Cstb            | adult behavior;adult locomotory behavior;beh                                               | cysteine-type endopeptidase inhibitor activity       |
| Triosephosphate isomerase                           | Tpi1            | alcohol biosynthetic process;alcohol catabolic                                             | structural constituent of ribosome;structural m      |
| Kinesin-like protein KIF23                          | KIF23           | cell cycle process;cellular component assembly                                             | adenyl nucleotide binding;adenyl ribonucleoti        |
| 60S ribosomal protein Rpl22                         | Rpl22           | alpha-beta T cell activation;alpha-beta T cell di                                          | binding;carbohydrate binding;glycosaminoglyc         |
| Receptor of activated C-kinase 1                    | Rack1           | anatomical structure morphogenesis;biological                                              | apoptotic protease activator activity;binding;ca     |
| Dynein light chain 1, cytoplasmic                   | Dync1l1         | apoptosis;biological regulation;biosynthetic pr                                            | catalytic activity;enzyme regulator activity;hyd     |
| Proliferation-associated protein S100-A6            | Pa2g4           | biological regulation;biosynthetic process;cellu                                           | binding;DNA binding;nucleic acid binding;nucle       |
| 60S ribosomal protein Rpl36a;Gm55                   | Rpl36a;Gm55     | biosynthetic process;cellular biosynthetic proc                                            | binding;calcium ion binding;cation binding;ion       |
| Glucose-6-phosphate isomerase                       | G6pdx           | alcohol biosynthetic process;alcohol catabolic                                             | binding;catalytic activity;coenzyme binding;cof      |
| Kinesin-1 heavy chain; KIF5B                        | KIF5b           | biological regulation;cellular chemical homeos                                             | adenyl nucleotide binding;adenyl ribonucleoti        |
| Eukaryotic translation Initiation Factor 2E         | EIF2S3x         | catabolic process;cellular catabolic process;cell                                          | binding;catalytic activity;GTP binding;GTPase a      |
| CTP synthase 1                                      | Ctps1           | amine metabolic process;biosynthetic process;                                              | adenyl nucleotide binding;adenyl ribonucleoti        |
| Dynactin subunit 2                                  | Dctn2           | cell cycle phase;cell cycle process;cell prolifera                                         | catalytic activity;hydrolase activity;hydrolase a    |
| 40S ribosomal protein Rps20                         | Rps20           | biosynthetic process;cellular biosynthetic proc                                            | binding;nucleic acid binding;RNA binding;struc       |
| Peroxisomal membrane protein 1                      | Pmp13           | biological regulation;catabolic process;cell killi                                         | antioxidant activity;binding;catalytic activity;ca   |
| Dynactin subunit 1                                  | Dctn1           | establishment of localization;transport                                                    | catalytic activity;hydrolase activity;hydrolase a    |
| Destrin                                             | Dstn            | actin cytoskeleton organization;actin filament                                             | cell cortex part;cell part;cortical actin cytoskele  |
| 40S ribosomal protein Rps10                         | Rps10           | cellular component assembly;cellular compone                                               | structural constituent of ribosome;structural m      |
| Ras-related protein Rab6a                           | Rab6a           | biological regulation;cellular macromolecule                                               | ATPase activator activity;ATPase regulator activ     |
| Serine-tRNA ligase; CysS                            | Sars            | amine metabolic process;amino acid activation                                              | adenyl nucleotide binding;adenyl ribonucleoti        |
| Peroxisomal membrane protein 2; Peroxi              | Pmp22           | activation of MAPK activity;anatomical structu                                             | antioxidant activity;binding;catalytic activity;ox   |
| 60S ribosomal protein Rpl37a                        | Rpl37a          | biosynthetic process;cellular biosynthetic proc                                            | binding;cation binding;ion binding;metal ion bi      |
| 60S ribosomal protein Rpl38                         | Rpl38           | 90S preribosome assembly;anatomical structu                                                | structural constituent of ribosome;structural m      |
| 60S ribosomal protein Rpl31                         | Rpl31           | biosynthetic process;cellular biosynthetic proc                                            | structural constituent of ribosome;structural m      |
| Torsin-1B; Torsin-1B Fr                             | Tor1b           | cellular component assembly;cellular compone                                               | adenyl nucleotide binding;adenyl ribonucleoti        |
| Synaptic vesicle membrane protein 1                 | Vat1            | biological regulation;negative regulation of bio                                           | binding;catalytic activity;cation binding;ion bin    |
| Thrombospondin-1                                    | Thbs1           | anatomical structure development;anatomical                                                | binding;calcium ion binding;carbohydrate bind        |
| Beta-enolase                                        | Eno3            | aging;alcohol catabolic process;alcohol metab                                              | binding;carbon-oxygen lyase activity;catalytic a     |
| Cytosolic acyl coenzyme A synthase 1                | Aco1            | carboxylic acid catabolic process;carboxylic aci                                           | acyl-CoA thioesterase activity;carboxylesterase      |
| Endonuclease domain-containing protein 1            | Endod1          | cellular metabolic process;cellular nitrogen cor                                           | binding;catalytic activity;cation binding;endon      |
| Ubiquitin-fold modifier 1                           | Ufm1            | cellular macromolecule metabolic process;cellu                                             | cell part;cytoplasm;intracellular membrane-bo        |
| Kinesin light chain 1                               | Klc1            | axon cargo transport;cellular component disas                                              | catalytic activity;hydrolase activity;hydrolase a    |
| Elongation factor 2                                 | Eef2            | biosynthetic process;cellular biosynthetic proc                                            | binding;catalytic activity;GTP binding;GTPase a      |
| ATP-dependent RNA helicase DDX19A;Ddx1              | DDX19A;Ddx1     | anatomical structure development;biological r                                              | adenyl nucleotide binding;adenyl ribonucleoti        |
| 40S ribosomal protein Rps12-ps3;Rps12               | Rps12-ps3;Rps12 | biosynthetic process;cellular biosynthetic proc                                            | structural constituent of ribosome;structural m      |
| Ras-related protein Rab4b                           | Rab4b           | biological regulation;cellular process;cellular r                                          | binding;catalytic activity;GDP binding;GTP bind      |
| Alpha-actinin-1                                     | Actr1a          | amine metabolic process;amino acid activation                                              | adenyl nucleotide binding;adenyl ribonucleoti        |
| Cysteine-tRNA ligase; CysS                          | Cars            | defense response;detection of abiotic stimulus                                             | binding;carbohydrate binding;endopeptidase in        |
| Lactate dehydrogenase 1                             | Ldha            | cellular metabolic process;cellular process;met                                            | binding;catalytic activity;cation binding;hydro      |
| Inorganic pyrophosphatase 2                         | Ppa2            | cellular metabolic process;cellular process;met                                            | binding;catalytic activity;cation binding;hydro      |
| Alcohol dehydrogenase 1                             | Adh5            | aging;alcohol catabolic process;alcohol metab                                              | alcohol dehydrogenase (NAD) activity;binding;        |
| Protein FAM234B                                     | Fam234b         | biological regulation;cellular process;cellular r                                          | binding;enzyme binding;intermediate filament         |
| Ubiquilin-1                                         | Ubln1           | biological regulation;cellular process;cellular r                                          | binding;DNA binding;nucleic acid binding;prote       |
| Nascent polypeptide-associated protein 1 (Fragment) | Napa1           | cellular process;establishment of localization;e                                           | catalytic activity;dipeptidase activity;exopeptid    |
| AHNAK nucleoprotein                                 | Ahnak2          | binding;nucleic acid binding                                                               |                                                      |
| GTP cytohydrolase 1                                 | Gchfr           | biological regulation;cellular component assem                                             | amine binding;amino acid binding;binding;carb        |
| Bicoid 2                                            | Bicd2           | biological regulation;cellular component move                                              | cell part;cell projection;cytoplasmic membrane       |
| Platelet-activating factor acetyltransferase 1      | Paafah1b1       | acrosome assembly;actin cytoskeleton organiz                                               | binding;cytoskeletal protein binding;microtubu       |
| Ribonucleoside-diphosphate kinase 1                 | Rps28           | biosynthetic process;cellular biosynthetic proc                                            | adenyl nucleotide binding;adenyl ribonucleoti        |
| 40S ribosomal protein Rps28                         | Rps28           | structural constituent of ribosome;structural m                                            | cell part;cytosolic small ribosomal subunit;intra    |
| E3 ubiquitin-protein ligase Rbx1                    | Rbx1            | catabolic process;cellular catabolic process;cell                                          | acid-amino acid ligase activity;binding;catalytic    |
| Stathmin-2                                          | Stmn2           | biological regulation;negative regulation of bio                                           | binding;binding;                                     |
| Mitochondrial import receptor 1                     | Tomm70          | anatomical structure development;biological r                                              | adenyl nucleotide binding;adenyl ribonucleoti        |
| Nucleoside diphosphate kinase 1                     | Nme1            | biosynthetic process;cellular biosynthetic proc                                            | binding;nucleic acid binding;RNA binding;struc       |
| 40S ribosomal protein Rps15                         | Rps15           | biological regulation;biosynthetic process;cellu                                           |                                                      |
| Basic leucine zipper transcription factor 2         | Bztf2           | anatomical structure development;biological r                                              | adenyl nucleotide binding;adenyl ribonucleoti        |
| Discoidin domain-containing protein 2               | Ddr2            | alcohol metabolic process;anatomical structure                                             | binding;cytokine activity;identical protein bind     |
| Aminoacyl-tRNA synthetase 1                         | Aimp1           |                                                                                            | aminoacyl-tRNA synthetase multi-enzyme comp          |
| Testis-expressed gene 264                           | Tex264          |                                                                                            |                                                      |
| Elongator complex protein 2                         | Elp2            | biological regulation;biosynthetic process;cellu                                           | binding;DNA binding;endopeptidase activator          |
| Plasminogen activator                               | Serpb1          | binding;mRNA 3'-UTR binding;mRNA binding;n                                                 | cell part;cytoplasm;cytoplasmic part;intracellu      |
| MCG6846, isoform CRA b                              | Prpsap1         | biological regulation;biosynthetic process;cellu                                           | binding;catalytic activity;cation binding;diphos     |
| Tumor protein p53-inducible protein 2               | Tp53inp2;Tp     | autophagic vacuole assembly;biological regulat                                             | binding;autophagic vacuole assembly;biological regul |
| GTP-binding protein 1                               | Gtbbp1          | binding;catalytic activity;GTP binding;GTPase a                                            | cell part;cytoplasmic exosome (RNase complex         |
| Microtubule-associated protein 1B                   | Map1b           | anatomical structure development;axon extend                                               | binding;catalytic activity;cytoskeletal protein bi   |
| Atlastin-2                                          | Atl2            | catabolic process;cellular catabolic process;cell                                          | binding;catalytic activity;GTP binding;GTPase a      |
| Leucine-rich repeat family protein 1                | Lrrfip1         | biological regulation;biosynthetic process;cell                                            | binding;DNA binding;nucleic acid binding             |
| Inosine triphosphate phosphatase 1                  | Itpa            | catabolic process;cellular catabolic process;cell                                          | binding;catalytic activity;cation binding;dITP di    |
| Geranylgeranyl transferase 1                        | Rabggt1         | cellular macromolecule metabolic process;cellu                                             | binding;catalytic activity;cation binding;ion bin    |
| Beta-actin                                          | Actr1b          | adenyl nucleotide binding;adenyl ribonucleoti                                              | cell part;cytoplasm;cytoplasmic part                 |
| Protein arginine N-methyltransferase 1              | Prmt3           | cellular macromolecule metabolic process;cellu                                             | arginine N-methyltransferase activity;binding;c      |
| Proteasome subunit beta 5                           | Psm5b           | catabolic process;cellular catabolic process;cell                                          | catalytic activity;endopeptidase activity;hydro      |
| Fasciculation and elongation factor 2               | Fez2            |                                                                                            |                                                      |
| Ras-related protein Rab1b                           | Rab1b           | biological regulation;cellular process;cellular r                                          | binding;GTP binding;guanyl nucleotide binding        |
| Metalloproteinase inhibitor 1                       | Timp3           | biological regulation;cellular process;cellular r                                          | binding;cation binding;endopeptidase inhibitor       |
| HEAT repeat-containing protein 5a                   | Heat5a          |                                                                                            |                                                      |
| Serine hydroxymethyltransferase 1                   | Shmt1           | amine biosynthetic process;amine catabolic pr                                              | aldehyde-lyase activity;amine binding;amino a        |
| Methylthioinosine phosphorylase 1                   | Mri1            | amine biosynthetic process;amine metabolic p                                               | catalytic activity;intramolecular oxidoreductase     |
| Protein PBDC1                                       | Pbdc1           |                                                                                            |                                                      |
| 4-hydroxyproline metabolic process; amine me        | P4ha2           | binding;carboxylic acid binding;catalytic activit                                          | cell part;collagen;cytoplasmic part;endoplasmic      |
| 60S ribosomal protein Rpl39                         | Rpl39           | biosynthetic process;cellular biosynthetic proc                                            | structural constituent of ribosome;structural m      |
| Teneurin-4                                          | Tenn4           | anatomical structure formation involved in mo                                              | binding;identical protein binding;protein bindin     |
| 40S ribosomal protein Rps21                         | Rps21           | biosynthetic process;cellular biosynthetic proc                                            | binding;ribonucleoprotein binding;ribosome bi        |
| Protein prune homolog 1                             | Prune2          | apoptosis;cell death;cellular process;death;pro                                            | catalytic activity;hydrolase activity;hydrolase a    |
| Triple functional domain protein 1                  | Trio            | biological regulation;regulation of biological pr                                          | adenyl nucleotide binding;adenyl ribonucleoti        |
| Eukaryotic translation Initiation Factor 4e         | Eif4e           | anatomical structure development;biological r                                              | binding;nucleic acid binding;RNA binding;trans       |
| 40S ribosomal protein Rps29                         | Rps29           | biosynthetic process;cellular biosynthetic proc                                            | binding;cation binding;ion binding;metal ion bi      |
|                                                     |                 |                                                                                            | cell part;cytosolic small ribosomal subunit;intra    |
|                                                     |                 |                                                                                            | Ribosome                                             |
|                                                     |                 |                                                                                            | Phagosome;Vasopressin-regulated water reabs          |
|                                                     |                 |                                                                                            | Insulin signaling pathway;mTOR signaling pathw       |
|                                                     |                 |                                                                                            | Glycine, serine and threonine metabolism;Met         |
|                                                     |                 |                                                                                            | Aminoacyl-tRNA biosynthesis;Porphyrin and ch         |
|                                                     |                 |                                                                                            | Drug metabolism - other enzymes;Purine meta          |
|                                                     |                 |                                                                                            | RNA transport                                        |
|                                                     |                 |                                                                                            | Glycine, serine and threonine metabolism;Met         |
|                                                     |                 |                                                                                            | Biosynthesis of unsaturated fatty acids;Steroid      |
|                                                     |                 |                                                                                            | Aminoacyl-tRNA biosynthesis                          |
|                                                     |                 |                                                                                            | Axon guidance;Fc gamma R-mediated phagocyt           |
|                                                     |                 |                                                                                            | Protein processing in endoplasmic reticulum          |
|                                                     |                 |                                                                                            | Aminoacyl-tRNA biosynthesis                          |
|                                                     |                 |                                                                                            | Cellular process;establishment of localization;e     |
|                                                     |                 |                                                                                            | Carbon fixation in photosynthetic organisms;Fr       |
|                                                     |                 |                                                                                            | cell part;centralspindlin complex;centrosome;c       |
|                                                     |                 |                                                                                            | cell part;cytoplasmic part;cytosolic large ribos     |
|                                                     |                 |                                                                                            | Ribosome                                             |
|                                                     |                 |                                                                                            | cell body;cell part;cell projection;cytoplasmic p    |
|                                                     |                 |                                                                                            | Measles                                              |
|                                                     |                 |                                                                                            | cell part;cytoplasm;chromosomal part;cytoplas        |
|                                                     |                 |                                                                                            | Vasopressin-regulated water reabsorption             |
|                                                     |                 |                                                                                            | cell part;cytoplasm;intracellular membrane-bo        |
|                                                     |                 |                                                                                            | cell part;cell projection;cytoplasmic part;cytos     |
|                                                     |                 |                                                                                            | Ribosome                                             |
|                                                     |                 |                                                                                            | cell part;cytoplasm;intracellular non-membran        |
|                                                     |                 |                                                                                            | Glutathione metabolism;Pentose phosphate pa          |
|                                                     |                 |                                                                                            | cell part;cell projection;cell projection part;cilia |
|                                                     |                 |                                                                                            | RNA transport                                        |
|                                                     |                 |                                                                                            | Pyrimidine metabolism                                |
|                                                     |                 |                                                                                            | cell part;cell projection part;centrosome;chrom      |
|                                                     |                 |                                                                                            | Huntington's disease;Vasopressin-regulated wa        |
|                                                     |                 |                                                                                            | cell part;cytosolic small ribosomal subunit;intra    |
|                                                     |                 |                                                                                            | Ribosome                                             |
|                                                     |                 |                                                                                            | cell part;chromatin;chromosomal part;cytoplas        |
|                                                     |                 |                                                                                            | Peroxisome                                           |
|                                                     |                 |                                                                                            | cell leading edge;cell part;centrosome;chromo        |
|                                                     |                 |                                                                                            | Huntington's disease;Vasopressin-regulated wa        |
|                                                     |                 |                                                                                            | cell cortex part;cell part;cortical actin cytoskele  |
|                                                     |                 |                                                                                            | Ribosome                                             |
|                                                     |                 |                                                                                            | cell part;cytoplasmic part;endoplasmic reticulu      |
|                                                     |                 |                                                                                            | organellar part;intracellular part                   |
|                                                     |                 |                                                                                            | ECM-receptor interaction;Focal adhesion;Malai        |
|                                                     |                 |                                                                                            | cell part;cytoplasmic part;cytosolic part;intra      |
|                                                     |                 |                                                                                            | Glycolysis / Gluconeogenesis;Methane metabo          |
|                                                     |                 |                                                                                            | cell body;cell part;cell projection;cytoplasmic      |
|                                                     |                 |                                                                                            | Biosynthesis of unsaturated fatty acids              |
|                                                     |                 |                                                                                            | extracellular region                                 |
|                                                     |                 |                                                                                            | Apoptosis                                            |
|                                                     |                 |                                                                                            | cell part;cytoplasm;intracellular membrane-bo        |
|                                                     |                 |                                                                                            | axon;cell body;cell part;cell projection;cell proj   |
|                                                     |                 |                                                                                            | cell part;cytoplasm;intracellular part;macro         |
|                                                     |                 |                                                                                            | cell part;chromatid body;cytoplasm;cytoplasm         |
|                                                     |                 |                                                                                            | cell part;cytoplasmic part;cytosolic small ribos     |
|                                                     |                 |                                                                                            | Ribosome                                             |
|                                                     |                 |                                                                                            | cell part;cytoplasmic part;cytoplasmic vesicle n     |
|                                                     |                 |                                                                                            | Endocytosis                                          |
|                                                     |                 |                                                                                            | cell part;cytoplasm;cytoplasmic part                 |
|                                                     |                 |                                                                                            | Aminoacyl-tRNA biosynthesis                          |
|                                                     |                 |                                                                                            | cell part;cytoplasm;intracellular part               |
|                                                     |                 |                                                                                            | Oxidative phosphorylation                            |
|                                                     |                 |                                                                                            | cell part;cytoplasmic part;intracellular membra      |
|                                                     |                 |                                                                                            | Chloroalkane and chloroalkene degradation;Dr         |
|                                                     |                 |                                                                                            | cell part;integral to membrane;intrinsic to mem      |
|                                                     |                 |                                                                                            | cell part;cytoplasmic part;endoplasmic reticulu      |
|                                                     |                 |                                                                                            | Protein processing in endoplasmic reticulum          |
|                                                     |                 |                                                                                            | cell part;cytoplasm;intracellular membrane-bo        |
|                                                     |                 |                                                                                            | cell part;cytoplasm;intracellular organelle part;    |
|                                                     |                 |                                                                                            |                                                      |
|                                                     |                 |                                                                                            | cell part;cytoplasmic part;cytoplasmic membrane      |
|                                                     |                 |                                                                                            | cell part;cytoplasmic part;cytoplasmic vesicle;c     |
|                                                     |                 |                                                                                            | Ether lipid metabolism                               |
|                                                     |                 |                                                                                            | cell part;cytoplasmic part;intracellular part;ma     |
|                                                     |                 |                                                                                            | Glutathione metabolism;Purine metabolism;Py          |
|                                                     |                 |                                                                                            | cell part;cytosolic small ribosomal subunit;intra    |
|                                                     |                 |                                                                                            | Ribosome                                             |
|                                                     |                 |                                                                                            | cell part;cytoplasmic part;integral to membran       |
|                                                     |                 |                                                                                            | axon;cell part;cell projection;cell projection pa    |
|                                                     |                 |                                                                                            | cell part;cytoplasmic part;integral to membran       |
|                                                     |                 |                                                                                            | cell part;centrosome;cytoplasmic part;cytoske        |
|                                                     |                 |                                                                                            | Purine metabolism;Pyrimidine metabolism              |
|                                                     |                 |                                                                                            | cell part;intracellular organelle part;intracellular |
|                                                     |                 |                                                                                            | Ribosome                                             |
|                                                     |                 |                                                                                            | cell part;integral to membrane;intrinsic to mem      |
|                                                     |                 |                                                                                            | aminoacyl-tRNA synthetase multi-enzyme comp          |
|                                                     |                 |                                                                                            | cell part;cytoplasm;Elongator holoenzyme com         |
|                                                     |                 |                                                                                            | cell part;cytoplasm;cytoplasmic part;intracellu      |
|                                                     |                 |                                                                                            | macromolecular complex;protein complex;ribo          |
|                                                     |                 |                                                                                            | autophagic vacuole;cell part;cytoplasmic part;c      |
|                                                     |                 |                                                                                            | cell part;cytoplasmic exosome (RNase complex         |
|                                                     |                 |                                                                                            | cell junction;cell part;cell projection;cell projec  |
|                                                     |                 |                                                                                            | cell part;cytoplasmic part;endoplasmic reticulu      |
|                                                     |                 |                                                                                            | cell part;cytoplasm;intracellular membrane-bo        |
|                                                     |                 |                                                                                            | cell part;cytoplasm;intracellular part               |
|                                                     |                 |                                                                                            | Drug metabolism - other enzymes;Purine meta          |
|                                                     |                 |                                                                                            | cell part;cytoplasmic part;cytosol;intracellular     |
|                                                     |                 |                                                                                            | Cyanoamino acid metabolism;Glycine, serine ar        |
|                                                     |                 |                                                                                            | cell part;cytoplasmic part;cytosol;intracellular     |
|                                                     |                 |                                                                                            | Cysteine and methionine metabolism                   |
|                                                     |                 |                                                                                            | cell part;collagen;cytoplasmic part;endoplasmic      |
|                                                     |                 |                                                                                            | Arginine and proline metabolism                      |
|                                                     |                 |                                                                                            | cell part;cytoplasmic part;intracellular non-me      |
|                                                     |                 |                                                                                            | Ribosome                                             |
|                                                     |                 |                                                                                            | axon;cell part;cell projection;cytoplasm;cytopla     |
|                                                     |                 |                                                                                            | Ribosome                                             |
|                                                     |                 |                                                                                            | cell part;cytoplasmic part;Golgi apparatus;intra     |
|                                                     |                 |                                                                                            | cell part;cytoplasm;intracellular part               |
|                                                     |                 |                                                                                            | Insulin signaling pathway;mTOR signaling pathw       |
|                                                     |                 |                                                                                            | cell part;chromatid body;cytoplasmic mRNA p          |
|                                                     |                 |                                                                                            | Ribosome                                             |

|                         |        |                                                |                                                  |                                                      |
|-------------------------|--------|------------------------------------------------|--------------------------------------------------|------------------------------------------------------|
| Dynactin subunit 4      | Dctn4  |                                                | cell part;centrosome;contractile fiber part;cyto | Huntington's disease;Vasopressin-regulated wa        |
| Collagen alpha-1(VIII)  | Col8a1 | anatomical structure formation involved in mo  | basement membrane;collagen;extracellular ma      |                                                      |
| FAT atypical cadherin 1 | Fat1   | actin cytoskeleton organization;actin filament | binding;calcium ion binding;cation binding;ion   | cell junction;cell part;cell projection;cell-cell ju |

**Supplemental table 4: Immune system-related proteins in EMT/6**

| Selection value                      | -Log t-test P-value<br>EMT/6 Control vs RT | t-test difference<br>EMT/6 Control vs RT | Protein name                                                      | Gene name |
|--------------------------------------|--------------------------------------------|------------------------------------------|-------------------------------------------------------------------|-----------|
| Overexpressed in EMT/6 Control group | 1.564964956                                | -2.082789103                             | Complement component 1, s subcomponent 1;Complement C1s-4         | C1s1;C1sa |
| Overexpressed in EMT/6 Control group | 2.274859318                                | -1.688479106                             | Complement factor H                                               | Cfh       |
| Overexpressed in EMT/6 Control group | 2.774803021                                | -1.572367986                             | Fractalkine                                                       | Cx3cl1    |
| Overexpressed in EMT/6 Control group | 1.222555596                                | -1.520752589                             | Inhibitor of nuclear factor kappa-B kinase subunit beta (Fragment | Ikbkb     |
| Overexpressed in EMT/6 Control group | 2.313794333                                | -1.324079514                             | Vascular endothelial growth factor A                              | Vegfa     |
| Overexpressed in EMT/6 Control group | 2.7212314                                  | -1.149957657                             | C-X-C motif chemokine 5                                           | Cxcl5     |
| Overexpressed in EMT/6 Control group | 1.911601251                                | -0.891702016                             | C-X-C motif chemokine 3                                           | Cxcl3     |
| Overexpressed in EMT/6 Control group | 1.64024887                                 | -0.467979431                             | Osteopontin                                                       | Spp1      |
| Overexpressed in EMT/6 Control group | 3.24275804                                 | -0.850516001                             | Disintegrin and metalloproteinase domain-containing protein 10    | Adam10    |
| Overexpressed in EMT/6 Control group | 1.367017024                                | -0.82421875                              | Tyrosine-protein kinase Tec;Tyrosine-protein kinase               | Tec       |
| Overexpressed in EMT/6 Control group | 1.826763218                                | -0.807607015                             | Prefoldin 1;Prefoldin subunit 1                                   | Pfdn1     |
| Overexpressed in EMT/6 Control group | 1.504544329                                | -0.80054601                              | Complement C1r-A subcomponent;Complement C1r-B subcompo           | C1ra;C1rb |
| Overexpressed in EMT/6 Control group | 2.118481252                                | -0.73431778                              | C-type lectin domain family 2 member D                            | Clec2d    |
| Overexpressed in EMT/6 Control group | 1.540510327                                | -0.705455144                             | Epidermal growth factor receptor                                  | Egfr      |
| Overexpressed in EMT/6 Control group | 1.686627859                                | -0.683345159                             | Integrin alpha-6                                                  | Itga6     |
| Overexpressed in EMT/6 Control group | 3.580388975                                | -0.677254995                             | Proteasome activator complex subunit 1 (Fragment);Proteasome      | Psme1     |
| Overexpressed in EMT/6 Control group | 4.701501834                                | -0.592772166                             | Nck-associated protein 1                                          | Nckap1    |
| Overexpressed in EMT/6 Control group | 1.66038175                                 | -0.581769943                             | Dipeptidyl peptidase 1                                            | Ctsc      |
| Overexpressed in EMT/6 Control group | 5.072144227                                | -0.566053391                             | Macrophage migration inhibitory factor                            | Mif       |
| Overexpressed in EMT/6 Control group | 2.18375626                                 | -0.558676402                             | Ubiquitin-conjugating enzyme E2 N                                 | Ube2n     |
| Overexpressed in EMT/6 Control group | 2.18221965                                 | -0.542819341                             | Peptidyl-prolyl cis-trans isomerase FKBP1A                        | Fkbp1a    |
| Overexpressed in EMT/6 Control group | 2.091304007                                | -0.53572464                              | Pentraxin-related protein PTX3                                    | Ptx3      |
| Overexpressed in EMT/6 Control group | 2.789816234                                | -0.53094101                              | Neurogenic locus notch homolog protein 2                          | Notch2    |
| Overexpressed in EMT/6 Control group | 2.693112541                                | -0.527263641                             | Protein NDRG1                                                     | Ndrp1     |
| Overexpressed in EMT/6 Control group | 2.813250172                                | -0.369141897                             | Galectin-1                                                        | Lgals1    |
| Overexpressed in EMT/6 Control group | 2.847286833                                | -0.360414505                             | Galectin;Galectin-3                                               | Lgals3    |
| Overexpressed in EMT/6 Control group | 2.749924628                                | -0.313562393                             | Superoxide dismutase [Cu-Zn]                                      | Sod1      |
| Overexpressed in EMT/6 RT group      | 2.253748407                                | 0.345085144                              | Dolichyl-diphosphooligosaccharide--protein glycosyltransferase 4  | Ddost     |
| Overexpressed in EMT/6 RT group      | 2.468897916                                | 0.357931773                              | Caveolin-1;Caveolin (Fragment)                                    | Cav1      |
| Overexpressed in EMT/6 RT group      | 3.975965801                                | 0.487415314                              | Annexin A3                                                        | Anxa3     |
| Overexpressed in EMT/6 RT group      | 1.810869016                                | 0.48900795                               | RAC-alpha serine/threonine-protein kinase                         | Akt1      |
| Overexpressed in EMT/6 RT group      | 1.782900815                                | 0.610490163                              | Complement component 1 Q subcomponent-binding protein, mit        | C1qbp     |
| Overexpressed in EMT/6 RT group      | 1.3920395                                  | 0.66785113                               | SPI6                                                              | Serpinb9  |
| Overexpressed in EMT/6 RT group      | 4.355034047                                | 0.694709142                              | 60 kDa heat shock protein, mitochondrial                          | Hspd1     |
| Overexpressed in EMT/6 RT group      | 1.672428934                                | 0.774076462                              | Nuclear factor NF-kappa-B p100 subunit                            | Nfkb2     |
| Overexpressed in EMT/6 RT group      | 3.798183545                                | 0.947730382                              | Ferritin heavy chain                                              | Fth1      |
| Overexpressed in EMT/6 RT group      | 5.023851988                                | 1.005846024                              | Tubulointerstitial nephritis antigen-like                         | Tinagl1   |

**Supplemental table 5: Immune system-related proteins in PyMT**

| Selection value                      | -Log t-test P-value<br>PyMT Control vs RT | t-test difference<br>PyMT Control vs RT | Protein name                                  | Gene name |
|--------------------------------------|-------------------------------------------|-----------------------------------------|-----------------------------------------------|-----------|
| Overexpressed in EMT/6 Control group | 2.735926848                               | -3.123858134                            | Complement factor H                           | Cfh       |
| Overexpressed in EMT/6 Control group | 2.782136599                               | -1.646229426                            | Protein CTLA-2-alpha;Uncharacterized protein  | Ctla2a    |
| Overexpressed in EMT/6 Control group | 2.840269096                               | -1.444316228                            | Gamma-interferon-inducible lysosomal thiol re | Ifi30     |
| Overexpressed in EMT/6 Control group | 2.344985299                               | -1.386327744                            | Macrophage colony-stimulating factor 1;Macro  | Csf1      |
| Overexpressed in EMT/6 Control group | 1.556270295                               | -1.375341415                            | Antigen peptide transporter 1                 | Tap1      |
| Overexpressed in EMT/6 Control group | 4.505391367                               | -1.333791097                            | Osteopontin                                   | Spp1      |
| Overexpressed in EMT/6 Control group | 2.588120991                               | -1.324750264                            | Beta-2-microglobulin                          | B2m       |
| Overexpressed in EMT/6 Control group | 2.438440466                               | -1.245669683                            | Vascular endothelial growth factor A          | Vegfa     |
| Overexpressed in EMT/6 Control group | 3.093332461                               | -1.068702062                            | Fractalkine                                   | Cx3cl1    |
| Overexpressed in EMT/6 Control group | 1.819320811                               | -1.014217377                            | Pentraxin-related protein PTX3                | Ptx3      |
| Overexpressed in EMT/6 Control group | 2.278765773                               | -0.999883652                            | Angiotensin-converting enzyme;Angiotensin-co  | Ace       |
| Overexpressed in EMT/6 Control group | 1.617174647                               | -0.7658933                              | Protein canopy homolog 3                      | Cnpy3     |
| Overexpressed in EMT/6 Control group | 2.13935466                                | -0.405347824                            | Tubulointerstitial nephritis antigen-like     | Tinagl1   |
| Overexpressed in EMT/6 RT group      | 2.738859445                               | 0.321188609                             | Hypoxanthine-guanine phosphoribosyltransfera  | Hprt1     |
| Overexpressed in EMT/6 RT group      | 3.08619317                                | 0.368747711                             | 60S ribosomal protein L22                     | Rpl22     |
| Overexpressed in EMT/6 RT group      | 3.212125635                               | 0.409210841                             | Peroxiredoxin-1;Peroxiredoxin-1 (Fragment)    | Prdx1     |
| Overexpressed in EMT/6 RT group      | 2.890570138                               | 0.440524419                             | Peroxiredoxin-2;Peroxiredoxin-2 (Fragment)    | Prdx2     |
| Overexpressed in EMT/6 RT group      | 3.077122953                               | 0.624221166                             | Aminoacyl tRNA synthase complex-interacting   | Aimp1     |

**Supplemental table 6: Fisher exact test for the comparison between EMT/6 Control and EMT/6 RT. FDR threshold: 0.02**

| Selection value                 | Category column | Category value                                                                                | Total size | Selection size | Category size | Intersection size | Enrichment factor | P value   | Benj. Hoch. FDR |
|---------------------------------|-----------------|-----------------------------------------------------------------------------------------------|------------|----------------|---------------|-------------------|-------------------|-----------|-----------------|
| Enriched in EMT/6 RT group      | GOBP name       | acetyl-CoA catabolic process                                                                  | 2975       | 246            | 22            | 14                | 7.6959            | 8.22E-11  | 1.20E-07        |
| Enriched in EMT/6 RT group      | GOBP name       | acetyl-CoA metabolic process                                                                  | 2975       | 246            | 27            | 14                | 6.2707            | 3.42E-09  | 2.13E-06        |
| Enriched in EMT/6 Control group | GOMF name       | adenyl nucleotide binding                                                                     | 2975       | 243            | 395           | 13                | 0.40293           | 1.60E-05  | 0.0023883       |
| Enriched in EMT/6 Control group | GOMF name       | adenyl ribonucleotide binding                                                                 | 2975       | 243            | 393           | 13                | 0.40498           | 1.80E-05  | 0.0024033       |
| Enriched in EMT/6 Control group | GOBP name       | alcohol catabolic process                                                                     | 2975       | 243            | 43            | 12                | 3.4166            | 8.36E-05  | 0.018511        |
| Enriched in EMT/6 RT group      | KEGG name       | Alzheimer's disease                                                                           | 2975       | 246            | 80            | 26                | 3.9304            | 2.27E-10  | 1.92E-08        |
| Enriched in EMT/6 RT group      | KEGG name       | Arginine and proline metabolism                                                               | 2975       | 246            | 22            | 9                 | 4.9473            | 2.65E-05  | 0.0010322       |
| Enriched in EMT/6 Control group | GOMF name       | ATP binding                                                                                   | 2975       | 243            | 390           | 13                | 0.40809           | 2.16E-05  | 0.0026815       |
| Enriched in EMT/6 RT group      | GOBP name       | ATP biosynthetic process                                                                      | 2975       | 246            | 19            | 13                | 8.2745            | 1.04E-10  | 1.24E-07        |
| Enriched in EMT/6 RT group      | GOBP name       | ATP hydrolysis coupled proton transport                                                       | 2975       | 246            | 13            | 10                | 9.3027            | 2.81E-09  | 2.16E-06        |
| Enriched in EMT/6 RT group      | GOBP name       | ATP metabolic process                                                                         | 2975       | 246            | 39            | 16                | 4.9614            | 1.76E-08  | 9.21E-06        |
| Enriched in EMT/6 RT group      | GOBP name       | ATP synthesis coupled proton transport                                                        | 2975       | 246            | 13            | 11                | 10.233            | 6.63E-11  | 1.24E-07        |
| Enriched in EMT/6 RT group      | GOMF name       | ATPase activity, coupled to movement of substances                                            | 2975       | 246            | 40            | 11                | 3.3257            | 0.0002089 | 0.018119        |
| Enriched in EMT/6 RT group      | GOMF name       | ATPase activity, coupled to transmembrane movement of ions                                    | 2975       | 246            | 26            | 10                | 4.6513            | 1.77E-05  | 0.0024451       |
| Enriched in EMT/6 RT group      | GOMF name       | ATPase activity, coupled to transmembrane movement of substances                              | 2975       | 246            | 40            | 11                | 3.3257            | 0.0002089 | 0.017707        |
| Enriched in EMT/6 RT group      | KEGG name       | Benzoate degradation                                                                          | 2975       | 246            | 7             | 5                 | 8.6382            | 6.60E-05  | 0.002386        |
| Enriched in EMT/6 RT group      | GOMF name       | binding                                                                                       | 2975       | 246            | 1700          | 112               | 0.79675           | 3.62E-05  | 0.00397         |
| Enriched in EMT/6 RT group      | GOBP name       | biological regulation                                                                         | 2975       | 246            | 1348          | 79                | 0.70874           | 3.54E-06  | 0.0013232       |
| Enriched in EMT/6 RT group      | GOBP name       | biosynthetic process                                                                          | 2975       | 246            | 496           | 76                | 1.853             | 3.27E-09  | 2.14E-06        |
| Enriched in EMT/6 RT group      | KEGG name       | Butanoate metabolism                                                                          | 2975       | 246            | 11            | 7                 | 7.6959            | 5.76E-06  | 0.00029144      |
| Enriched in EMT/6 Control group | GOMF name       | carbohydrate binding                                                                          | 2975       | 243            | 86            | 22                | 3.1319            | 5.23E-07  | 9.29E-05        |
| Enriched in EMT/6 Control group | GOBP name       | carbohydrate catabolic process                                                                | 2975       | 243            | 44            | 13                | 3.6172            | 2.23E-05  | 0.0059565       |
| Enriched in EMT/6 RT group      | KEGG name       | Cardiac muscle contraction                                                                    | 2975       | 246            | 29            | 12                | 5.0042            | 1.02E-06  | 6.42E-05        |
| Enriched in EMT/6 Control group | GOMF name       | catalytic activity                                                                            | 2975       | 243            | 1230          | 76                | 0.75647           | 0.0001927 | 0.017115        |
| Enriched in EMT/6 RT group      | GOMF name       | cation transmembrane transporter activity                                                     | 2975       | 246            | 81            | 30                | 4.4791            | 1.71E-13  | 1.28E-10        |
| Enriched in EMT/6 RT group      | GOBP name       | cation transport                                                                              | 2975       | 246            | 88            | 27                | 3.7105            | 4.35E-10  | 4.06E-07        |
| Enriched in EMT/6 RT group      | GOMF name       | cation-transporting ATPase activity                                                           | 2975       | 246            | 16            | 7                 | 5.2909            | 0.0001311 | 0.012539        |
| Enriched in EMT/6 RT group      | GOCC name       | cell part                                                                                     | 2975       | 246            | 2689          | 238               | 1.0704            | 4.73E-05  | 0.0020885       |
| Enriched in EMT/6 Control group | GOCC name       | cell part                                                                                     | 2975       | 243            | 2689          | 203               | 0.92424           | 0.0001635 | 0.0067148       |
| Enriched in EMT/6 RT group      | GOBP name       | cellular biosynthetic process                                                                 | 2975       | 246            | 469           | 74                | 1.9081            | 1.47E-09  | 1.28E-06        |
| Enriched in EMT/6 Control group | GOBP name       | cellular carbohydrate catabolic process                                                       | 2975       | 243            | 40            | 13                | 3.9789            | 7.17E-06  | 0.0024679       |
| Enriched in EMT/6 Control group | GOBP name       | cellular component assembly at cellular level                                                 | 2975       | 243            | 231           | 36                | 1.908             | 4.03E-05  | 0.009955        |
| Enriched in EMT/6 RT group      | GOBP name       | cellular ketone metabolic process                                                             | 2975       | 246            | 207           | 33                | 1.9279            | 6.83E-05  | 0.015414        |
| Enriched in EMT/6 RT group      | GOBP name       | cellular macromolecule biosynthetic process                                                   | 2975       | 246            | 237           | 39                | 1.9901            | 7.21E-06  | 0.0024186       |
| Enriched in EMT/6 RT group      | GOBP name       | cellular metabolic process                                                                    | 2975       | 246            | 1279          | 143               | 1.3521            | 2.25E-07  | 9.48E-05        |
| Enriched in EMT/6 Control group | GOBP name       | chromatin assembly                                                                            | 2975       | 243            | 6             | 5                 | 10.202            | 1.93E-05  | 0.0054954       |
| Enriched in EMT/6 Control group | GOBP name       | chromatin organization                                                                        | 2975       | 243            | 56            | 17                | 3.7166            | 8.19E-07  | 0.00032464      |
| Enriched in EMT/6 Control group | GOCC name       | chromosomal part                                                                              | 2975       | 243            | 98            | 18                | 2.2487            | 0.0004841 | 0.016764        |
| Enriched in EMT/6 RT group      | GOCC name       | chromosomal part                                                                              | 2975       | 246            | 98            | 0                 | 0                 | 0.0001831 | 0.0073477       |
| Enriched in EMT/6 Control group | GOBP name       | chromosome organization                                                                       | 2975       | 243            | 75            | 18                | 2.9383            | 1.45E-05  | 0.0042238       |
| Enriched in EMT/6 RT group      | KEGG name       | Citrate cycle (TCA cycle)                                                                     | 2975       | 246            | 26            | 16                | 7.4422            | 7.14E-12  | 9.03E-10        |
| Enriched in EMT/6 RT group      | GOBP name       | coenzyme catabolic process                                                                    | 2975       | 246            | 24            | 14                | 7.0545            | 4.28E-10  | 4.31E-07        |
| Enriched in EMT/6 RT group      | GOBP name       | coenzyme metabolic process                                                                    | 2975       | 246            | 72            | 18                | 3.0234            | 9.49E-06  | 0.0030303       |
| Enriched in EMT/6 RT group      | GOBP name       | cofactor catabolic process                                                                    | 2975       | 246            | 26            | 14                | 6.5119            | 1.79E-09  | 1.46E-06        |
| Enriched in EMT/6 RT group      | GOBP name       | cofactor metabolic process                                                                    | 2975       | 246            | 89            | 19                | 2.5818            | 5.52E-05  | 0.013132        |
| Enriched in EMT/6 RT group      | KEGG name       | Collecting duct acid secretion                                                                | 2975       | 246            | 12            | 8                 | 8.0623            | 6.97E-07  | 5.04E-05        |
| Enriched in EMT/6 RT group      | GOMF name       | cytochrome-c oxidase activity                                                                 | 2975       | 246            | 10            | 8                 | 9.6748            | 7.49E-08  | 2.33E-05        |
| Enriched in EMT/6 RT group      | GOCC name       | cytoplasm                                                                                     | 2975       | 246            | 679           | 27                | 0.48089           | 3.49E-07  | 2.05E-05        |
| Enriched in EMT/6 RT group      | GOCC name       | cytoplasmic part                                                                              | 2975       | 246            | 1672          | 186               | 1.3453            | 2.22E-11  | 3.27E-09        |
| Enriched in EMT/6 Control group | GOCC name       | cytoplasmic part                                                                              | 2975       | 243            | 1672          | 114               | 0.83474           | 0.0005405 | 0.018356        |
| Enriched in EMT/6 RT group      | GOCC name       | cytosolic large ribosomal subunit                                                             | 2975       | 246            | 26            | 13                | 6.0467            | 2.25E-08  | 1.65E-06        |
| Enriched in EMT/6 RT group      | GOCC name       | cytosolic small ribosomal subunit                                                             | 2975       | 246            | 24            | 8                 | 4.0312            | 0.0003782 | 0.013359        |
| Enriched in EMT/6 RT group      | GOBP name       | dicarboxylic acid metabolic process                                                           | 2975       | 246            | 19            | 8                 | 5.092             | 5.92E-05  | 0.013823        |
| Enriched in EMT/6 Control group | GOMF name       | DNA binding                                                                                   | 2975       | 243            | 164           | 32                | 2.3888            | 1.03E-06  | 0.00016771      |
| Enriched in EMT/6 RT group      | GOBP name       | energy coupled proton transport, against electrochemical gradient                             | 2975       | 246            | 13            | 10                | 9.3027            | 2.81E-09  | 2.04E-06        |
| Enriched in EMT/6 RT group      | GOBP name       | energy coupled proton transport, down electrochemical gradient                                | 2975       | 246            | 13            | 11                | 10.233            | 6.63E-11  | 1.09E-07        |
| Enriched in EMT/6 RT group      | KEGG name       | Epithelial cell signaling in Helicobacter pylori infection                                    | 2975       | 246            | 28            | 9                 | 3.8872            | 0.0002228 | 0.0070459       |
| Enriched in EMT/6 Control group | GOCC name       | ESCRT 1 complex                                                                               | 2975       | 243            | 4             | 4                 | 12.243            | 4.35E-05  | 0.0019702       |
| Enriched in EMT/6 Control group | GOCC name       | extracellular matrix                                                                          | 2975       | 243            | 61            | 20                | 4.014             | 2.04E-08  | 1.56E-06        |
| Enriched in EMT/6 Control group | GOCC name       | extracellular matrix part                                                                     | 2975       | 243            | 55            | 13                | 2.8938            | 0.0002533 | 0.0093208       |
| Enriched in EMT/6 Control group | GOCC name       | extracellular region                                                                          | 2975       | 243            | 121           | 21                | 2.1248            | 0.000376  | 0.013551        |
| Enriched in EMT/6 Control group | GOCC name       | extracellular region part                                                                     | 2975       | 243            | 235           | 57                | 2.9695            | 1.54E-15  | 3.89E-13        |
| Enriched in EMT/6 Control group | GOCC name       | extracellular space                                                                           | 2975       | 243            | 127           | 32                | 3.0848            | 1.80E-09  | 1.77E-07        |
| Enriched in EMT/6 RT group      | GOMF name       | heme-copper terminal oxidase activity                                                         | 2975       | 246            | 10            | 8                 | 9.6748            | 7.49E-08  | 2.15E-05        |
| Enriched in EMT/6 RT group      | GOBP name       | heterocycle biosynthetic process                                                              | 2975       | 246            | 79            | 18                | 2.7555            | 3.56E-05  | 0.0089494       |
| Enriched in EMT/6 Control group | GOBP name       | hexose catabolic process                                                                      | 2975       | 243            | 30            | 11                | 4.489             | 1.01E-05  | 0.0031469       |
| Enriched in EMT/6 RT group      | KEGG name       | Huntington's disease                                                                          | 2975       | 246            | 82            | 28                | 4.1295            | 1.15E-11  | 1.16E-09        |
| Enriched in EMT/6 RT group      | GOMF name       | hydrogen ion transmembrane transporter activity                                               | 2975       | 246            | 38            | 28                | 8.911             | 2.46E-23  | 9.17E-20        |
| Enriched in EMT/6 RT group      | GOMF name       | hydrogen ion transporting ATP synthase activity, rotational mechanism                         | 2975       | 246            | 8             | 6                 | 9.0701            | 7.15E-06  | 0.0011108       |
| Enriched in EMT/6 RT group      | GOBP name       | hydrogen transport                                                                            | 2975       | 246            | 27            | 22                | 9.854             | 3.41E-20  | 4.47E-16        |
| Enriched in EMT/6 RT group      | GOMF name       | hydrogen-exporting ATPase activity, phosphorylative mechanism                                 | 2975       | 246            | 6             | 5                 | 10.078            | 2.05E-05  | 0.0026403       |
| Enriched in EMT/6 Control group | GOMF name       | hydrolase activity, acting on acid anhydrides                                                 | 2975       | 243            | 263           | 6                 | 0.2793            | 2.27E-05  | 0.0027294       |
| Enriched in EMT/6 RT group      | GOMF name       | hydrolase activity, acting on acid anhydrides, catalyzing transmembrane movement of substance | 2975       | 246            | 41            | 12                | 3.5396            | 5.71E-05  | 0.0059204       |
| Enriched in EMT/6 Control group | GOMF name       | hydrolase activity, acting on acid anhydrides, in phosphorus-containing anhydrides            | 2975       | 243            | 260           | 6                 | 0.28253           | 2.78E-05  | 0.0032445       |
| Enriched in EMT/6 RT group      | GOMF name       | inorganic cation transmembrane transporter activity                                           | 2975       | 246            | 57            | 30                | 6.365             | 1.09E-18  | 1.35E-15        |
| Enriched in EMT/6 RT group      | GOCC name       | intracellular organelle lumen                                                                 | 2975       | 246            | 105           | 29                | 3.3401            | 1.49E-09  | 1.54E-07        |
| Enriched in EMT/6 RT group      | GOCC name       | intracellular organelle part                                                                  | 2975       | 246            | 1383          | 176               | 1.539             | 6.29E-17  | 2.22E-14        |
| Enriched in EMT/6 Control group | GOCC name       | intracellular organelle part                                                                  | 2975       | 243            | 1383          | 85                | 0.75245           | 4.28E-05  | 0.0019868       |
| Enriched in EMT/6 RT group      | GOCC name       | intracellular part                                                                            | 2975       | 246            | 2443          | 226               | 1.1188            | 3.18E-06  | 0.00017522      |
| Enriched in EMT/6 RT group      | GOBP name       | ion transmembrane transport                                                                   | 2975       | 246            | 35            | 20                | 6.9106            | 1.06E-13  | 2.31E-10        |
| Enriched in EMT/6 RT group      | GOMF name       | ion transmembrane transporter activity                                                        | 2975       | 246            | 98            | 31                | 3.8255            | 8.25E-12  | 5.13E-09        |
| Enriched in EMT/6 RT group      | GOBP name       | ion transport                                                                                 | 2975       | 246            | 100           | 29                | 3.5071            | 4.21E-10  | 4.59E-07        |
| Enriched in EMT/6 RT group      | GOCC name       | large ribosomal subunit                                                                       | 2975       | 246            | 31            | 14                | 5.4616            | 3.26E-08  | 2.22E-06        |
| Enriched in EMT/6 RT group      | GOCC name       | macromolecular complex                                                                        | 2975       | 246            | 994           | 112               | 1.3626            | 1.12E-05  | 0.00054819      |
| Enriched in EMT/6 RT group      | GOBP name       | macromolecule biosynthetic process                                                            | 2975       | 246            | 243           | 39                | 1.9409            | 1.30E-05  | 0.0038654       |
| Enriched in EMT/6 RT group      | GOCC name       | membrane part                                                                                 | 2975       | 246            | 916           | 100               | 1.3203            | 0.0001568 | 0.0065918       |
| Enriched in EMT/6 RT group      | GOCC name       | membrane-enclosed lumen                                                                       | 2975       | 246            | 125           | 31                | 2.9992            | 6.72E-09  | 5.65E-07        |
| Enriched in EMT/6 RT group      | GOBP name       | metabolic process                                                                             | 2975       | 246            | 1428          | 154               | 1.3042            | 5.43E-07  | 0.00022203      |
| Enriched in EMT/6 RT group      | GOCC name       | mitochondrial inner membrane                                                                  | 2975       | 246            | 109           | 48                | 5.3256            | 3.58E-25  | 3.16E-22        |
| Enriched in EMT/6 RT group      | GOCC name       | mitochondrial matrix                                                                          | 2975       | 246            | 48            | 21                | 5.2909            | 2.14E-11  | 3.44E-09        |
| Enriched in EMT/6 RT group      | GOCC name       | mitochondrial membrane                                                                        | 2975       | 246            | 156           | 53                | 4.1087            | 2.16E-21  | 9.51E-19        |
| Enriched in EMT/6 RT group      | GOCC name       | mitochondrial membrane part                                                                   | 2975       | 246            | 55            | 24                | 5.2772            | 7.82E-13  | 1.53E-10        |
| Enriched in EMT/6 RT group      | GOCC name       | mitochondrial nucleoid                                                                        | 2975       | 246            | 18            | 10                | 6.7186            | 2.84E-07  | 1.73E-05        |
| Enriched in EMT/6 RT group      | GOCC name       | mitochondrial part                                                                            | 2975       | 246            | 239           | 83                | 4.1998            | 3.51E-35  | 6.19E-32        |
| Enriched in EMT/6 RT group      | GOCC name       | mitochondrial proton-transporting ATP synthase complex                                        | 2975       | 246            | 15            | 12                | 9.6748            | 2.83E-11  | 3.84E-09        |
| Enriched in EMT/6 RT group      | GOCC name       | mitochondrial proton-transporting ATP synthase complex, coupling factor F(0)                  | 2975       | 246            | 7             | 7                 | 12.093            | 2.44E-08  | 1.73E-06        |
| Enriched in EMT/6 RT group      | GOCC name       | mitochondrial respiratory chain complex III                                                   | 2975       | 246            | 6             | 4                 | 8.0623            | 0.0005785 | 0.018919        |
| Enriched in EMT/6 RT group      | GOCC name       | mitochondrion                                                                                 | 2975       | 246            | 330           | 54                | 1.9789            | 1.22E-07  | 7.72E-06        |
| Enriched in EMT/6 Control group | GOMF name       | monosaccharide binding                                                                        | 2975       | 243            | 20            | 8                 | 4.8971            | 8.32E-05  | 0.0083826       |
| Enriched in EMT/6 Control group | GOBP name       | monosaccharide catabolic process                                                              | 2975       | 243            | 32            | 11                | 4.2085            | 2.02E-05  | 0.0055191       |
| Enriched in EMT/6 RT group      | GOMF name       | monovalent inorganic cation transmembrane transporter activity                                | 2975       | 246            | 51            | 29                | 6.8767            | 2.39E-19  | 4.46E-16        |
| Enriched in EMT/6 RT group      | GOBP name       | monovalent inorganic cation transport                                                         | 2975       | 246            | 39            | 23                | 7.1321            | 5.09E-16  | 1.66E-12        |
| Enriched in EMT/6 RT group      | GOCC name       | nucleoid                                                                                      | 2975       | 246            | 19            | 10                | 6.365             | 5.51E-07  | 3.14E-05        |
| Enriched in EMT/6 RT group      | GOBP name       | nucleoside triphosphate biosynthetic process                                                  | 2975       | 246            | 28            | 13                | 5.6148            | 6.86E-08  | 3.33E-05        |
| Enriched in EMT/6 RT group      | GOBP name       | nucleoside triphosphate metabolic process                                                     | 2975       | 246            | 71            | 17                | 2.8956            | 3.01E-05  | 0.0077233       |
| Enriched in EMT/6 Control group | GOMF name       | nucleoside-triphosphatase activity                                                            | 2975       | 243            | 248           | 5                 | 0.24683           | 1.61E-05  | 0.0023119       |
| Enriched in EMT/6 Control group | GOCC name       | nucleosome                                                                                    | 2975       | 243            | 17            | 12                | 8.642             | 2.82E-10  | 3.11E-08        |
| Enriched in EMT/6 Control group | GOBP name       | nucleosome assembly                                                                           | 2975       | 243            | 21            | 12                | 6.9959            | 9.68E-09  | 5.51E-06        |

|                                 |           |                                                                               |      |     |      |     |         |           |            |
|---------------------------------|-----------|-------------------------------------------------------------------------------|------|-----|------|-----|---------|-----------|------------|
| Enriched in EMT/6 Control group | GOBP name | nucleosome organization                                                       | 2975 | 243 | 24   | 12  | 6.1214  | 6.97E-08  | 3.26E-05   |
| Enriched in EMT/6 Control group | GOMF name | nucleotide binding                                                            | 2975 | 243 | 656  | 33  | 0.61587 | 0.0001699 | 0.015456   |
| Enriched in EMT/6 RT group      | GOCC name | nucleus                                                                       | 2975 | 246 | 625  | 32  | 0.61919 | 0.0002525 | 0.0094869  |
| Enriched in EMT/6 RT group      | GOCC name | organelle inner membrane                                                      | 2975 | 246 | 120  | 49  | 4.9382  | 6.84E-24  | 4.03E-21   |
| Enriched in EMT/6 RT group      | GOCC name | organelle lumen                                                               | 2975 | 246 | 106  | 29  | 3.3086  | 1.89E-09  | 1.76E-07   |
| Enriched in EMT/6 RT group      | GOCC name | organelle membrane                                                            | 2975 | 246 | 585  | 81  | 1.6745  | 1.03E-07  | 6.74E-06   |
| Enriched in EMT/6 RT group      | GOCC name | organelle part                                                                | 2975 | 246 | 1407 | 176 | 1.5128  | 5.39E-16  | 1.59E-13   |
| Enriched in EMT/6 Control group | GOCC name | organelle part                                                                | 2975 | 243 | 1407 | 86  | 0.74832 | 2.65E-05  | 0.0012671  |
| Enriched in EMT/6 RT group      | KEGG name | Oxidative phosphorylation                                                     | 2975 | 246 | 70   | 37  | 6.3923  | 5.52E-23  | 2.79E-20   |
| Enriched in EMT/6 RT group      | GOMF name | oxidoreductase activity                                                       | 2975 | 246 | 230  | 41  | 2.1558  | 5.10E-07  | 9.51E-05   |
| Enriched in EMT/6 RT group      | GOMF name | oxidoreductase activity, acting on a heme group of donors                     | 2975 | 246 | 11   | 8   | 8.7953  | 2.52E-07  | 4.96E-05   |
| Enriched in EMT/6 RT group      | GOMF name | oxidoreductase activity, acting on a heme group of donors, oxygen as acceptor | 2975 | 246 | 10   | 8   | 9.6748  | 7.49E-08  | 1.99E-05   |
| Enriched in EMT/6 RT group      | KEGG name | Parkinson's disease                                                           | 2975 | 246 | 65   | 28  | 5.2095  | 1.26E-14  | 2.13E-12   |
| Enriched in EMT/6 Control group | KEGG name | Pentose phosphate pathway                                                     | 2975 | 243 | 20   | 7   | 4.285   | 0.0005898 | 0.016579   |
| Enriched in EMT/6 RT group      | KEGG name | Phagosome                                                                     | 2975 | 246 | 72   | 15  | 5.2195  | 0.0004161 | 0.012385   |
| Enriched in EMT/6 RT group      | GOMF name | protein binding                                                               | 2975 | 246 | 376  | 13  | 0.41813 | 3.75E-05  | 0.0039975  |
| Enriched in EMT/6 Control group | GOCC name | proteinaceous extracellular matrix                                            | 2975 | 243 | 35   | 11  | 3.8477  | 5.12E-05  | 0.0022039  |
| Enriched in EMT/6 Control group | GOCC name | protein-DNA complex                                                           | 2975 | 243 | 20   | 13  | 7.9578  | 2.35E-10  | 2.76E-08   |
| Enriched in EMT/6 Control group | GOBP name | protein-DNA complex assembly                                                  | 2975 | 243 | 21   | 12  | 6.9959  | 9.68E-09  | 5.28E-06   |
| Enriched in EMT/6 Control group | GOBP name | protein-DNA complex subunit organization                                      | 2975 | 243 | 24   | 12  | 6.1214  | 6.97E-08  | 3.15E-05   |
| Enriched in EMT/6 RT group      | GOBP name | proton transport                                                              | 2975 | 246 | 27   | 22  | 9.854   | 3.41E-20  | 2.23E-16   |
| Enriched in EMT/6 RT group      | GOCC name | proton-transporting ATP synthase complex                                      | 2975 | 246 | 15   | 12  | 9.6748  | 2.83E-11  | 3.57E-09   |
| Enriched in EMT/6 RT group      | GOCC name | proton-transporting ATP synthase complex, catalytic core F(1)                 | 2975 | 246 | 5    | 4   | 9.6748  | 0.0002099 | 0.008239   |
| Enriched in EMT/6 RT group      | GOCC name | proton-transporting ATP synthase complex, coupling factor F(o)                | 2975 | 246 | 8    | 8   | 12.093  | 1.97E-09  | 1.74E-07   |
| Enriched in EMT/6 RT group      | GOMF name | proton-transporting ATPase activity, rotational mechanism                     | 2975 | 246 | 9    | 7   | 9.4061  | 7.43E-07  | 0.00012602 |
| Enriched in EMT/6 RT group      | GOCC name | proton-transporting two-sector ATPase complex                                 | 2975 | 246 | 19   | 15  | 9.5475  | 1.08E-13  | 2.39E-11   |
| Enriched in EMT/6 RT group      | GOCC name | proton-transporting two-sector ATPase complex, catalytic domain               | 2975 | 246 | 11   | 9   | 9.8947  | 7.35E-09  | 5.90E-07   |
| Enriched in EMT/6 RT group      | GOCC name | proton-transporting two-sector ATPase complex, proton-transporting domain     | 2975 | 246 | 12   | 11  | 11.086  | 1.11E-11  | 1.96E-09   |
| Enriched in EMT/6 RT group      | GOCC name | proton-transporting V-type ATPase, V1 domain                                  | 2975 | 246 | 5    | 4   | 9.6748  | 0.0002099 | 0.0080599  |
| Enriched in EMT/6 RT group      | GOBP name | purine nucleoside triphosphate biosynthetic process                           | 2975 | 246 | 24   | 13  | 6.5506  | 6.36E-09  | 3.78E-06   |
| Enriched in EMT/6 RT group      | GOBP name | purine nucleoside triphosphate metabolic process                              | 2975 | 246 | 65   | 17  | 3.1629  | 8.88E-06  | 0.0029051  |
| Enriched in EMT/6 Control group | GOMF name | purine nucleotide binding                                                     | 2975 | 243 | 531  | 16  | 0.3689  | 7.62E-08  | 1.90E-05   |
| Enriched in EMT/6 RT group      | GOBP name | purine nucleotide biosynthetic process                                        | 2975 | 246 | 43   | 13  | 3.6562  | 1.94E-05  | 0.005409   |
| Enriched in EMT/6 Control group | GOMF name | purine ribonucleoside triphosphate binding                                    | 2975 | 243 | 525  | 16  | 0.37311 | 1.14E-07  | 2.35E-05   |
| Enriched in EMT/6 RT group      | GOBP name | purine ribonucleoside triphosphate biosynthetic process                       | 2975 | 246 | 23   | 13  | 6.8355  | 3.16E-09  | 2.18E-06   |
| Enriched in EMT/6 RT group      | GOBP name | purine ribonucleoside triphosphate metabolic process                          | 2975 | 246 | 63   | 17  | 3.2633  | 5.67E-06  | 0.0020621  |
| Enriched in EMT/6 Control group | GOMF name | purine ribonucleotide binding                                                 | 2975 | 243 | 529  | 16  | 0.37029 | 8.71E-08  | 2.03E-05   |
| Enriched in EMT/6 RT group      | GOBP name | purine ribonucleotide biosynthetic process                                    | 2975 | 246 | 39   | 13  | 4.0312  | 6.01E-06  | 0.0021243  |
| Enriched in EMT/6 Control group | GOMF name | pyrophosphatase activity                                                      | 2975 | 243 | 260  | 6   | 0.28253 | 2.78E-05  | 0.0031462  |
| Enriched in EMT/6 RT group      | GOCC name | pyruvate dehydrogenase complex                                                | 2975 | 246 | 3    | 3   | 12.093  | 0.0005591 | 0.018629   |
| Enriched in EMT/6 RT group      | KEGG name | Pyruvate metabolism                                                           | 2975 | 246 | 26   | 8   | 3.7211  | 0.000679  | 0.018083   |
| Enriched in EMT/6 RT group      | GOBP name | regulation of biological process                                              | 2975 | 246 | 1279 | 69  | 0.65242 | 1.72E-07  | 7.49E-05   |
| Enriched in EMT/6 Control group | GOBP name | regulation of cell aging                                                      | 2975 | 243 | 4    | 4   | 12.243  | 4.35E-05  | 0.010544   |
| Enriched in EMT/6 RT group      | GOBP name | regulation of cellular process                                                | 2975 | 246 | 1169 | 65  | 0.67244 | 3.39E-06  | 0.0013062  |
| Enriched in EMT/6 RT group      | GOCC name | respiratory chain complex III                                                 | 2975 | 246 | 6    | 4   | 8.0623  | 0.0005785 | 0.018575   |
| Enriched in EMT/6 RT group      | KEGG name | Rheumatoid arthritis                                                          | 2975 | 246 | 18   | 9   | 6.0467  | 3.62E-06  | 0.00020359 |
| Enriched in EMT/6 RT group      | GOCC name | ribonucleoprotein complex                                                     | 2975 | 246 | 243  | 40  | 1.9907  | 5.43E-06  | 0.00029068 |
| Enriched in EMT/6 RT group      | GOBP name | ribonucleoside triphosphate biosynthetic process                              | 2975 | 246 | 26   | 13  | 6.0467  | 2.25E-08  | 1.13E-05   |
| Enriched in EMT/6 RT group      | GOBP name | ribonucleoside triphosphate metabolic process                                 | 2975 | 246 | 66   | 17  | 3.115   | 1.10E-05  | 0.0033535  |
| Enriched in EMT/6 Control group | GOMF name | ribonucleotide binding                                                        | 2975 | 243 | 529  | 16  | 0.37029 | 8.71E-08  | 1.91E-05   |
| Enriched in EMT/6 RT group      | GOBP name | ribonucleotide biosynthetic process                                           | 2975 | 246 | 48   | 13  | 3.2753  | 6.77E-05  | 0.015545   |
| Enriched in EMT/6 RT group      | KEGG name | Ribosome                                                                      | 2975 | 246 | 79   | 33  | 5.0517  | 1.37E-16  | 3.46E-14   |
| Enriched in EMT/6 RT group      | GOCC name | ribosome                                                                      | 2975 | 246 | 39   | 13  | 4.0312  | 6.01E-06  | 0.00031197 |
| Enriched in EMT/6 RT group      | GOBP name | small molecule metabolic process                                              | 2975 | 246 | 472  | 62  | 1.5886  | 2.60E-05  | 0.0068058  |
| Enriched in EMT/6 RT group      | GOCC name | small ribosomal subunit                                                       | 2975 | 246 | 34   | 12  | 4.2683  | 7.09E-06  | 0.00035784 |
| Enriched in EMT/6 RT group      | GOMF name | structural constituent of ribosome                                            | 2975 | 246 | 83   | 31  | 4.5168  | 4.99E-14  | 4.65E-11   |
| Enriched in EMT/6 RT group      | GOMF name | structural molecule activity                                                  | 2975 | 246 | 159  | 37  | 2.8142  | 1.40E-09  | 5.78E-07   |
| Enriched in EMT/6 RT group      | GOMF name | substrate-specific transmembrane transporter activity                         | 2975 | 246 | 125  | 34  | 3.2894  | 8.05E-11  | 3.75E-08   |
| Enriched in EMT/6 RT group      | GOMF name | substrate-specific transporter activity                                       | 2975 | 246 | 167  | 35  | 2.5346  | 6.88E-08  | 2.33E-05   |
| Enriched in EMT/6 Control group | GOMF name | sugar binding                                                                 | 2975 | 243 | 20   | 8   | 4.8971  | 8.32E-05  | 0.008162   |
| Enriched in EMT/6 Control group | KEGG name | Systemic lupus erythematosus                                                  | 2975 | 243 | 20   | 8   | 4.8971  | 8.32E-05  | 0.002805   |
| Enriched in EMT/6 RT group      | GOMF name | transferase activity, transferring phosphorus-containing groups               | 2975 | 246 | 173  | 3   | 0.20971 | 0.0001526 | 0.014228   |
| Enriched in EMT/6 RT group      | GOBP name | translation                                                                   | 2975 | 246 | 81   | 31  | 4.6284  | 2.27E-14  | 5.94E-11   |
| Enriched in EMT/6 RT group      | GOBP name | transmembrane transport                                                       | 2975 | 246 | 54   | 27  | 6.0467  | 3.63E-16  | 1.58E-12   |
| Enriched in EMT/6 RT group      | GOMF name | transmembrane transporter activity                                            | 2975 | 246 | 141  | 37  | 3.1735  | 3.44E-11  | 1.83E-08   |
| Enriched in EMT/6 RT group      | GOMF name | transporter activity                                                          | 2975 | 246 | 198  | 40  | 2.4431  | 2.16E-08  | 8.07E-06   |
| Enriched in EMT/6 RT group      | GOBP name | tricarboxylic acid cycle                                                      | 2975 | 246 | 22   | 14  | 7.6959  | 8.22E-11  | 1.08E-07   |
| Enriched in EMT/6 RT group      | KEGG name | Valine, leucine and isoleucine degradation                                    | 2975 | 246 | 27   | 10  | 4.4791  | 2.59E-05  | 0.0010904  |
| Enriched in EMT/6 RT group      | KEGG name | Vibrio cholerae infection                                                     | 2975 | 246 | 29   | 11  | 4.5872  | 7.81E-06  | 0.0003594  |

Supplemental table 7: Fisher exact test for the comparison between PyMT Control and PyMT RT. FDR threshold: 0.02

| Selection value                | Category column | Category value                                         | Total size | Selection size | Category size | Intersection size | Enrichment factor | P value  | Benj. Hoch. FDR |
|--------------------------------|-----------------|--------------------------------------------------------|------------|----------------|---------------|-------------------|-------------------|----------|-----------------|
| Enriched in PyMT RT group      | KEGG name       | Aminoacyl-tRNA biosynthesis                            | 2975       | 110            | 21            | 6                 | 7.7273            | 7.10E-05 | 0.0044887       |
| Enriched in PyMT RT group      | GOBP name       | biosynthetic process                                   | 2975       | 110            | 496           | 38                | 2.072             | 1.70E-06 | 0.0014827       |
| Enriched in PyMT Control group | GOCC name       | catalytic step 2 spliceosome                           | 2975       | 205            | 33            | 16                | 7.0362            | 5.59E-11 | 1.97E-08        |
| Enriched in PyMT RT group      | GOBP name       | cellular biosynthetic process                          | 2975       | 110            | 469           | 38                | 2.1913            | 4.10E-07 | 0.00038329      |
| Enriched in PyMT RT group      | GOBP name       | cellular macromolecule biosynthetic process            | 2975       | 110            | 237           | 23                | 2.6247            | 7.32E-06 | 0.005039        |
| Enriched in PyMT RT group      | GOCC name       | centrosome                                             | 2975       | 110            | 73            | 11                | 4.0753            | 4.54E-05 | 0.0040123       |
| Enriched in PyMT Control group | GOBP name       | chromatin assembly                                     | 2975       | 205            | 6             | 6                 | 14.512            | 9.99E-08 | 0.00010898      |
| Enriched in PyMT Control group | GOBP name       | chromatin assembly or disassembly                      | 2975       | 205            | 8             | 6                 | 10.884            | 2.44E-06 | 0.0019921       |
| Enriched in PyMT Control group | GOBP name       | chromatin organization                                 | 2975       | 205            | 56            | 19                | 4.9238            | 1.43E-09 | 2.08E-06        |
| Enriched in PyMT Control group | GOCC name       | chromosomal part                                       | 2975       | 205            | 98            | 21                | 3.1098            | 1.25E-06 | 0.0001703       |
| Enriched in PyMT Control group | GOBP name       | chromosome organization                                | 2975       | 205            | 75            | 19                | 3.6764            | 2.75E-07 | 0.0002773       |
| Enriched in PyMT RT group      | GOCC name       | cytosolic small ribosomal subunit                      | 2975       | 110            | 24            | 6                 | 6.7614            | 0.000158 | 0.010339        |
| Enriched in PyMT Control group | GOMF name       | DNA binding                                            | 2975       | 205            | 164           | 40                | 3.5396            | 1.31E-13 | 4.88E-10        |
| Enriched in PyMT Control group | GOCC name       | extracellular matrix                                   | 2975       | 205            | 61            | 13                | 3.0928            | 0.000141 | 0.0099514       |
| Enriched in PyMT Control group | GOCC name       | extracellular region                                   | 2975       | 205            | 121           | 27                | 3.2383            | 1.43E-08 | 2.82E-06        |
| Enriched in PyMT Control group | GOCC name       | extracellular region part                              | 2975       | 205            | 235           | 39                | 2.4084            | 5.03E-08 | 8.08E-06        |
| Enriched in PyMT Control group | GOCC name       | extracellular space                                    | 2975       | 205            | 127           | 28                | 3.1995            | 1.01E-08 | 2.22E-06        |
| Enriched in PyMT Control group | KEGG name       | Glycosaminoglycan degradation                          | 2975       | 205            | 8             | 7                 | 12.698            | 5.00E-08 | 8.44E-06        |
| Enriched in PyMT Control group | GOMF name       | hydrolase activity, acting on glycosyl bonds           | 2975       | 205            | 22            | 9                 | 5.9368            | 6.06E-06 | 0.0037653       |
| Enriched in PyMT Control group | GOMF name       | hydrolase activity, hydrolyzing O-glycosyl compounds   | 2975       | 205            | 17            | 9                 | 7.6829            | 4.17E-07 | 0.00051865      |
| Enriched in PyMT RT group      | GOCC name       | integral to membrane                                   | 2975       | 110            | 568           | 7                 | 0.33331           | 7.94E-05 | 0.0058458       |
| Enriched in PyMT RT group      | GOCC name       | intrinsic to membrane                                  | 2975       | 110            | 586           | 7                 | 0.32307           | 4.49E-05 | 0.0041737       |
| Enriched in PyMT Control group | KEGG name       | Lysosome                                               | 2975       | 205            | 57            | 20                | 5.092             | 2.60E-10 | 1.31E-07        |
| Enriched in PyMT Control group | GOCC name       | lysosome                                               | 2975       | 205            | 83            | 28                | 4.8957            | 1.59E-13 | 2.81E-10        |
| Enriched in PyMT Control group | GOBP name       | lysosome organization                                  | 2975       | 205            | 9             | 6                 | 9.6748            | 6.82E-06 | 0.0049558       |
| Enriched in PyMT Control group | GOCC name       | lytic vacuole                                          | 2975       | 205            | 83            | 28                | 4.8957            | 1.59E-13 | 1.41E-10        |
| Enriched in PyMT RT group      | GOBP name       | macromolecule biosynthetic process                     | 2975       | 110            | 243           | 23                | 2.5599            | 1.10E-05 | 0.0072078       |
| Enriched in PyMT Control group | GOCC name       | melanosome                                             | 2975       | 205            | 71            | 15                | 3.066             | 4.94E-05 | 0.0041531       |
| Enriched in PyMT RT group      | GOCC name       | membrane part                                          | 2975       | 110            | 916           | 11                | 0.32478           | 9.98E-08 | 1.47E-05        |
| Enriched in PyMT RT group      | KEGG name       | Methane metabolism                                     | 2975       | 110            | 16            | 6                 | 10.142            | 1.25E-05 | 0.00090547      |
| Enriched in PyMT RT group      | GOCC name       | microtubule associated complex                         | 2975       | 110            | 33            | 9                 | 7.376             | 1.56E-06 | 0.00019724      |
| Enriched in PyMT Control group | GOCC name       | mitochondrial part                                     | 2975       | 205            | 239           | 3                 | 0.18216           | 2.15E-05 | 0.002114        |
| Enriched in PyMT Control group | GOBP name       | mRNA metabolic process                                 | 2975       | 205            | 100           | 31                | 4.4988            | 9.78E-14 | 1.28E-09        |
| Enriched in PyMT Control group | GOBP name       | mRNA processing                                        | 2975       | 205            | 85            | 27                | 4.6098            | 2.31E-12 | 1.51E-08        |
| Enriched in PyMT Control group | GOCC name       | nuclear body                                           | 2975       | 205            | 55            | 14                | 3.694             | 9.89E-06 | 0.0010912       |
| Enriched in PyMT Control group | GOCC name       | nuclear part                                           | 2975       | 205            | 430           | 58                | 1.9575            | 4.43E-08 | 7.82E-06        |
| Enriched in PyMT Control group | GOMF name       | nucleic acid binding                                   | 2975       | 205            | 408           | 67                | 2.3831            | 2.43E-13 | 4.54E-10        |
| Enriched in PyMT Control group | GOBP name       | nucleic acid metabolic process                         | 2975       | 205            | 351           | 52                | 2.15              | 1.13E-08 | 1.34E-05        |
| Enriched in PyMT RT group      | GOBP name       | nucleobase-containing small molecule metabolic process | 2975       | 110            | 147           | 17                | 3.1277            | 1.38E-05 | 0.0085845       |
| Enriched in PyMT Control group | GOBP name       | nucleobase-containing small molecule metabolic process | 2975       | 205            | 147           | 0                 | 0                 | 2.10E-05 | 0.012482        |
| Enriched in PyMT Control group | GOCC name       | nucleoplasm part                                       | 2975       | 205            | 106           | 19                | 2.6012            | 5.44E-05 | 0.0041767       |
| Enriched in PyMT Control group | GOCC name       | nucleosome                                             | 2975       | 205            | 17            | 11                | 9.3902            | 1.06E-09 | 3.13E-07        |
| Enriched in PyMT Control group | GOBP name       | nucleosome assembly                                    | 2975       | 205            | 21            | 13                | 8.9837            | 6.54E-11 | 1.71E-07        |
| Enriched in PyMT Control group | GOBP name       | nucleosome organization                                | 2975       | 205            | 24            | 13                | 7.8608            | 6.56E-10 | 1.23E-06        |
| Enriched in PyMT Control group | GOCC name       | organelle                                              | 2975       | 205            | 1600          | 134               | 1.2154            | 0.000141 | 0.0095764       |
| Enriched in PyMT Control group | KEGG name       | Other glycan degradation                               | 2975       | 205            | 9             | 6                 | 9.6748            | 6.82E-06 | 0.00057489      |
| Enriched in PyMT Control group | GOCC name       | pigment granule                                        | 2975       | 205            | 71            | 15                | 3.066             | 4.94E-05 | 0.0039643       |
| Enriched in PyMT Control group | GOCC name       | protein-DNA complex                                    | 2975       | 205            | 20            | 13                | 9.4329            | 2.66E-11 | 1.18E-08        |
| Enriched in PyMT Control group | GOBP name       | protein-DNA complex assembly                           | 2975       | 205            | 21            | 13                | 8.9837            | 6.54E-11 | 1.43E-07        |
| Enriched in PyMT Control group | GOBP name       | protein-DNA complex subunit organization               | 2975       | 205            | 24            | 13                | 7.8608            | 6.56E-10 | 1.07E-06        |
| Enriched in PyMT RT group      | GOCC name       | ribonucleoprotein complex                              | 2975       | 110            | 243           | 20                | 2.226             | 0.000281 | 0.017695        |
| Enriched in PyMT RT group      | KEGG name       | Ribosome                                               | 2975       | 110            | 79            | 14                | 4.7929            | 5.54E-07 | 7.00E-05        |
| Enriched in PyMT Control group | GOMF name       | RNA binding                                            | 2975       | 205            | 266           | 38                | 2.0732            | 3.53E-06 | 0.002637        |
| Enriched in PyMT Control group | GOBP name       | RNA metabolic process                                  | 2975       | 205            | 273           | 45                | 2.3921            | 4.85E-09 | 6.35E-06        |
| Enriched in PyMT Control group | GOBP name       | RNA processing                                         | 2975       | 205            | 117           | 30                | 3.7211            | 5.54E-11 | 1.81E-07        |
| Enriched in PyMT Control group | GOBP name       | RNA splicing                                           | 2975       | 205            | 75            | 25                | 4.8374            | 4.79E-12 | 2.09E-08        |
| Enriched in PyMT RT group      | GOCC name       | small ribosomal subunit                                | 2975       | 110            | 34            | 9                 | 7.1591            | 2.05E-06 | 0.00024177      |
| Enriched in PyMT Control group | GOCC name       | spliceosomal complex                                   | 2975       | 205            | 61            | 19                | 4.5202            | 7.20E-09 | 1.82E-06        |
| Enriched in PyMT Control group | KEGG name       | Spliceosome                                            | 2975       | 205            | 54            | 18                | 4.8374            | 5.45E-09 | 1.38E-06        |
| Enriched in PyMT RT group      | GOMF name       | structural constituent of ribosome                     | 2975       | 110            | 83            | 14                | 4.5619            | 1.03E-06 | 0.00095875      |
| Enriched in PyMT Control group | KEGG name       | Systemic lupus erythematosus                           | 2975       | 205            | 20            | 9                 | 6.5305            | 2.35E-06 | 0.00023743      |
| Enriched in PyMT RT group      | GOBP name       | translation                                            | 2975       | 110            | 81            | 13                | 4.3406            | 4.50E-06 | 0.0034664       |
| Enriched in PyMT Control group | GOCC name       | U12-type spliceosomal complex                          | 2975       | 205            | 14            | 7                 | 7.2561            | 1.42E-05 | 0.0014721       |
| Enriched in PyMT Control group | GOCC name       | vacuole                                                | 2975       | 205            | 89            | 28                | 4.5656            | 1.14E-12 | 6.72E-10        |

Supplemental table 8: T cell suppressing effect of TMPs extracted from the irradiated cells, as presented by a ratio between PD-L1-positive TMPs and T cell activation

|                    | <i>EMT/6</i>                                                                                   | <i>4T1</i>                                                                                     |
|--------------------|------------------------------------------------------------------------------------------------|------------------------------------------------------------------------------------------------|
| <i>Control</i>     | <b>0.073</b><br>(2.39% PD-L1 <sup>+</sup> TMPs /<br>3.27% CD8 <sup>+</sup> CD25 <sup>+</sup> ) | <b>0.157</b><br>(4.91% PD-L1 <sup>+</sup> TMPs /<br>3.12% CD8 <sup>+</sup> CD25 <sup>+</sup> ) |
| <i>2 Gy</i>        | <b>0.479</b><br>(9.22% PD-L1 <sup>+</sup> TMPs /<br>1.93% CD8 <sup>+</sup> CD25 <sup>+</sup> ) | <b>0.176</b><br>(5.61% PD-L1 <sup>+</sup> TMPs /<br>3.17% CD8 <sup>+</sup> CD25 <sup>+</sup> ) |
| <i>Fold change</i> | <b>6.56</b>                                                                                    | <b>1.12</b>                                                                                    |
